# Supplementary material for: Din Oversees Mesenchymal Stem Cell Homeostasis in Mouse Incisors
Source: Research Square preprint supplement (doi:10.21203/rs.3.rs-6568233/v1), 2025-05-14
Supplement: Supplementary file 1 [file 8b1fda7132ab390752b810e5.xlsx]

## Sheet: Proteins
Protein FDR Confidence: Combined	Master	Accession	Description	Coverage [%]	# Peptides	# PSMs	# Unique Peptides	MW [kDa]	Gene Symbol	Abundance_867048	Abundance_867049	Abundance_867050	Abundance_867051	Abundance_867052	Abundance_867053	Abundance_867054	Abundance_867055
High	Master Protein	A0A075B5P4	Ig gamma-1 chain C region secreted form (Fragment) OS=Mus musculus OX=10090 GN=Ighg1 PE=1 SV=1	69	21	1907	3	35.7		4.25016e+08	1.48531e+08	1.77076e+08	1.43655e+08	2.35767e+08	4.82878e+08	4.61348e+06	2.51548e+06
High	Master Protein	P01868	Ig gamma-1 chain C region secreted form OS=Mus musculus OX=10090 GN=Ighg1 PE=1 SV=1	80	24	1554	6	35.7	Ighg1	1.78907e+09	8.12011e+08	1.125e+09	7.66476e+08	1.52052e+09	1.97587e+09	1.71219e+07	3.1448e+07
High	Master Protein	P99024	Tubulin beta-5 chain OS=Mus musculus OX=10090 GN=Tubb5 PE=1 SV=1	83	31	1357	5	49.6	Tubb5	3.39747e+07	2.58269e+07	2.67275e+07	1.63223e+07	2.67862e+07	4.85277e+07	1.99441e+08	8.8714e+07
High	Master Protein	P20152	Vimentin OS=Mus musculus OX=10090 GN=Vim PE=1 SV=3	93	67	1261	57	53.7	Vim	6.44546e+07	3.64895e+07	8.03215e+07	3.64111e+07	3.47359e+07	1.18321e+08	4.54521e+09	2.2802e+09
High	Master Protein	P68372	Tubulin beta-4B chain OS=Mus musculus OX=10090 GN=Tubb4b PE=1 SV=1	83	31	1129	1	49.8	Tubb4b	6.88183e+07	3.84109e+07	5.03468e+07	4.13966e+07	7.6324e+07	1.11616e+08	8.02738e+08	3.42563e+08
High	Master Protein	Q9CWF2	Tubulin beta-2B chain OS=Mus musculus OX=10090 GN=Tubb2b PE=1 SV=1	76	28	1077	1	49.9	Tubb2b	1.02304e+06	626744	438569	125401	807459	2.17074e+06	1.5571e+07	5.47283e+06
High	Master Protein	Q7TMM9	Tubulin beta-2A chain OS=Mus musculus OX=10090 GN=Tubb2a PE=1 SV=1	67	27	1075	1	49.9	Tubb2a	239843	178474	167800		339790	532950	5.67226e+06	2.18093e+06
High	Master Protein	Q9QXS1	Plectin OS=Mus musculus OX=10090 GN=Plec PE=1 SV=3	59	259	1021	254	533.9	Plec	4.70733e+07	3.04163e+07	4.66074e+07	6.76842e+06	2.24862e+07	6.31837e+07	7.32825e+08	4.74087e+08
High	Master Protein	P63017	Heat shock cognate 71 kDa protein OS=Mus musculus OX=10090 GN=Hspa8 PE=1 SV=1	76	48	918	32	70.8	Hspa8	7.23888e+07	3.97339e+07	5.5803e+07	2.28038e+07	8.52674e+07	1.34743e+08	9.43947e+08	4.05517e+08
High	Master Protein	P68373	Tubulin alpha-1C chain OS=Mus musculus OX=10090 GN=Tuba1c PE=1 SV=1	64	28	839	1	49.9	Tuba1c	2.15265e+06	2.71818e+06	1.83715e+06	1.64818e+06	2.06976e+06	5.22267e+06	1.54768e+07	6.01486e+06
High	Master Protein	P68369	Tubulin alpha-1A chain OS=Mus musculus OX=10090 GN=Tuba1a PE=1 SV=1	69	29	833	2	50.1	Tuba1a	6.02747e+07	4.63501e+07	4.77133e+07	2.82706e+07	6.61306e+07	1.17982e+08	7.48795e+08	2.99114e+08
High	Master Protein	Q9D6F9	Tubulin beta-4A chain OS=Mus musculus OX=10090 GN=Tubb4a PE=1 SV=3	71	23	817	1	49.6	Tubb4a	29026.8					20182.6	820044	817527
High	Master Protein	P07724	Albumin OS=Mus musculus OX=10090 GN=Alb PE=1 SV=3	78	55	717	55	68.6	Alb	3.09995e+07	2.06946e+07	3.49348e+07	1.72567e+08	5.9872e+07	1.88662e+08	6.59561e+09	3.0479e+09
High	Master Protein	P20029	Endoplasmic reticulum chaperone BiP OS=Mus musculus OX=10090 GN=Hspa5 PE=1 SV=3	57	48	673	46	72.4	Hspa5	3.51578e+07	2.01124e+07	2.53455e+07	8.56717e+06	3.75864e+07	6.47433e+07	6.40963e+08	2.08256e+08
High	Master Protein	Q9ERD7	Tubulin beta-3 chain OS=Mus musculus OX=10090 GN=Tubb3 PE=1 SV=1	64	23	668	6	50.4	Tubb3	29492	74592.3	29591.4	2.10696e+06	239045	5.0265e+06	1.87811e+07	3.23728e+06
High	Master Protein	A0A0A0MQA5	Tubulin alpha chain (Fragment) OS=Mus musculus OX=10090 GN=Tuba4a PE=1 SV=1	54	24	653	4	52.9		550376	541701	463849	1.02299e+06	1.73469e+06	1.35387e+06	5.0408e+06	2.45518e+06
High	Master Protein	Q60847	Collagen alpha-1(XII) chain OS=Mus musculus OX=10090 GN=Col12a1 PE=2 SV=3	56	147	618	147	340	Col12a1	5.2235e+06	2.77378e+06	3.28986e+06	468157	4.6878e+06	2.74305e+07	1.19997e+09	1.24792e+09
High	Master Protein	Q80Z71	Tenascin-N OS=Mus musculus OX=10090 GN=Tnn PE=1 SV=2	64	91	617	91	173	Tnn	7.31215e+06	4.21856e+06	6.08633e+06	974101	7.86063e+06	5.80231e+07	2.75896e+09	1.66495e+09
High	Master Protein	E9Q616	AHNAK nucleoprotein (desmoyokin) OS=Mus musculus OX=10090 GN=Ahnak PE=1 SV=1	71	205	612	205	603.9	Ahnak	9.80058e+06	4.49639e+06	5.98487e+06	4.44463e+06	9.26779e+06	3.45109e+07	6.96323e+08	2.758e+08
High	Master Protein	P10126	Elongation factor 1-alpha 1 OS=Mus musculus OX=10090 GN=Eef1a1 PE=1 SV=3	59	27	609	16	50.1	Eef1a1; LOC101056619	8.1599e+07	7.42126e+07	5.57805e+07	3.17255e+07	1.05721e+08	1.3073e+08	6.80392e+08	3.71344e+08
High	Master Protein	P01837	Immunoglobulin kappa constant OS=Mus musculus OX=10090 GN=Igkc PE=1 SV=2	100	17	564	17	11.9		4.65522e+08	2.12272e+08	1.17186e+08	3.69481e+08	6.43644e+08	5.26935e+08	2.421e+07	3.1739e+07
High	Master Protein	P01865	Ig gamma-2A chain C region, membrane-bound form OS=Mus musculus OX=10090 GN=Igh-1a PE=1 SV=3	39	15	545	13	43.9	Ighg2a; Ighg	5.41399e+07	2.98162e+07	2.86763e+07	3.38449e+07	6.09876e+07	8.22866e+07	8.91867e+06	1.02726e+07
High	Master Protein	Q922F4	Tubulin beta-6 chain OS=Mus musculus OX=10090 GN=Tubb6 PE=1 SV=1	72	24	493	10	50.1	Tubb6	1.53814e+06	786535	1.09944e+06	155229	1.36567e+06	2.71828e+06	1.39342e+07	2.66817e+06
High	Master Protein	P52480	Pyruvate kinase PKM OS=Mus musculus OX=10090 GN=Pkm PE=1 SV=4	73	37	492	37	57.8	Pkm	2.36291e+07	2.00852e+07	1.79006e+07	6.16987e+06	4.48226e+07	4.91421e+07	4.50729e+08	2.71708e+08
High	Master Protein	P58252	Elongation factor 2 OS=Mus musculus OX=10090 GN=Eef2 PE=1 SV=2	70	57	476	56	95.3	Eef2	1.52682e+07	1.30759e+07	1.27165e+07	1.64086e+06	3.02064e+07	4.10908e+07	7.42264e+08	2.40333e+08
High	Master Protein	P56480	ATP synthase subunit beta, mitochondrial OS=Mus musculus OX=10090 GN=Atp5f1b PE=1 SV=2	76	29	451	29	56.3	Atp5b	1.39717e+07	5.796e+06	7.46322e+06	3.10549e+06	1.14529e+07	2.7745e+07	6.41796e+08	4.5597e+08
High	Master Protein	P17182	Alpha-enolase OS=Mus musculus OX=10090 GN=Eno1 PE=1 SV=3	82	37	436	31	47.1	Eno1; Gm5506; Eno1b	1.90769e+07	1.34463e+07	1.20408e+07	2.74147e+06	3.17233e+07	4.496e+07	6.60851e+08	3.52671e+08
High	Master Protein	Q8BTM8	Filamin-A OS=Mus musculus OX=10090 GN=Flna PE=1 SV=5	57	114	434	102	281	Flna	9.06439e+06	5.80049e+06	8.54276e+06	536262	1.09774e+07	4.12814e+07	1.4668e+09	7.1295e+08
High	Master Protein	Q03265	ATP synthase subunit alpha, mitochondrial OS=Mus musculus OX=10090 GN=Atp5f1a PE=1 SV=1	68	38	429	38	59.7	Atp5a1	1.93799e+07	1.25187e+07	1.40159e+07	3.30378e+06	1.921e+07	3.83943e+07	8.14654e+08	5.73896e+08
High	Master Protein	P62270	40S ribosomal protein S18 OS=Mus musculus OX=10090 GN=Rps18 PE=1 SV=3	72	23	428	23	17.7	Rps18	1.97107e+08	9.4631e+07	4.96569e+07	4.43782e+07	1.85569e+08	2.35027e+08	4.18375e+07	3.11556e+07
High	Master Protein	Q62009	Periostin OS=Mus musculus OX=10090 GN=Postn PE=1 SV=2	72	55	406	50	93.1	Postn	4.50852e+08	2.16158e+08	4.0087e+08	316825	4.60045e+08	5.87346e+08	1.70342e+09	9.21539e+08
High	Master Protein	P19324	Serpin H1 OS=Mus musculus OX=10090 GN=Serpinh1 PE=1 SV=3	66	30	400	30	46.5	Serpinh1	1.26911e+07	9.41098e+06	4.9385e+06	1.6201e+06	2.07035e+07	4.856e+07	1.25141e+09	8.06474e+08
High	Master Protein	P62702	40S ribosomal protein S4, X isoform OS=Mus musculus OX=10090 GN=Rps4x PE=1 SV=2	82	30	396	30	29.6	Rps4x	7.35809e+07	3.03246e+07	9.1917e+06	2.75758e+07	9.17431e+07	9.66677e+07	2.5799e+07	2.04029e+07
High	Master Protein	Q7TNC4	Putative RNA-binding protein Luc7-like 2 OS=Mus musculus OX=10090 GN=Luc7l2 PE=1 SV=1	49	26	389	18	46.6	Luc7l2	5.99609e+07	4.2453e+07	5.19735e+07	1.77005e+07	6.24423e+07	5.9851e+07	1.50537e+07	1.09461e+07
High	Master Protein	A0A0B4J1H7	Immunoglobulin kappa variable 1-135 (Fragment) OS=Mus musculus OX=10090 GN=Igkv1-135 PE=4 SV=1	35	8	381	8	13.3	Igkv1-135	9.64295e+08	6.95243e+08	2.05536e+08	3.38808e+08	1.35243e+09	1.28196e+09	1.25913e+08	1.41765e+08
High	Master Protein	P62908	40S ribosomal protein S3 OS=Mus musculus OX=10090 GN=Rps3 PE=1 SV=1	87	26	378	26	26.7	Rps3	6.23584e+07	2.63986e+07	1.28975e+07	1.97259e+07	6.92298e+07	7.41698e+07	3.44593e+07	2.85351e+07
High	Master Protein	P11499	Heat shock protein HSP 90-beta OS=Mus musculus OX=10090 GN=Hsp90ab1 PE=1 SV=3	57	48	363	28	83.2	Hsp90ab1	3.36753e+07	1.86291e+07	1.47578e+07	6.23164e+06	4.40511e+07	5.33746e+07	7.70491e+07	5.24238e+07
High	Master Protein	E9PWQ3	Collagen, type VI, alpha 3 OS=Mus musculus OX=10090 GN=Col6a3 PE=1 SV=2	45	115	356	115	353.7		1.95079e+06	1.66182e+06	2.06202e+06	186900	2.49075e+06	8.3954e+06	3.30414e+08	1.99939e+08
High	Master Protein	Q8VDD5	Myosin-9 OS=Mus musculus OX=10090 GN=Myh9 PE=1 SV=4	48	95	355	82	226.2	Myh9	1.38117e+07	5.57975e+06	8.44884e+06	2.91603e+06	1.6107e+07	2.02695e+07	2.87951e+08	6.11711e+07
High	Master Protein	Q01853	Transitional endoplasmic reticulum ATPase OS=Mus musculus OX=10090 GN=Vcp PE=1 SV=4	70	55	352	54	89.3	Vcp	1.22725e+07	4.22281e+06	4.49071e+06	1.00266e+06	1.06949e+07	1.87071e+07	4.53931e+08	1.20458e+08
High	Master Protein	P57780	Alpha-actinin-4 OS=Mus musculus OX=10090 GN=Actn4 PE=1 SV=1	76	63	351	43	104.9	Actn4	6.56322e+06	2.15121e+06	3.28752e+06	539555	3.62331e+06	1.65289e+07	5.27376e+08	2.30271e+08
High	Master Protein	P48678	Prelamin-A/C OS=Mus musculus OX=10090 GN=Lmna PE=1 SV=2	76	63	335	62	74.2	Lmna	1.32676e+07	7.44304e+06	1.40539e+07	2.68079e+06	1.30708e+07	3.92871e+07	1.10387e+09	3.01846e+08
High	Master Protein	Q8BMK4	Cytoskeleton-associated protein 4 OS=Mus musculus OX=10090 GN=Ckap4 PE=1 SV=2	76	43	319	43	63.7	Ckap4	3.27149e+07	6.42036e+06	8.90324e+06	2.34465e+06	1.23404e+07	3.08765e+07	9.40552e+08	4.61384e+08
High	Master Protein	Q7TPR4	Alpha-actinin-1 OS=Mus musculus OX=10090 GN=Actn1 PE=1 SV=1	69	55	316	32	103	Actn1	5.53415e+06	1.09613e+06	2.3022e+06	182492	2.70326e+06	6.42532e+06	1.68947e+08	58409483
High	Master Protein	P17156	Heat shock-related 70 kDa protein 2 OS=Mus musculus OX=10090 GN=Hspa2 PE=1 SV=2	54	32	313	15	69.6	Hspa2	309810	232093	424175	20524.1	260422	1.32484e+06	3.97069e+07	1.8127e+07
High	Master Protein	P27773	Protein disulfide-isomerase A3 OS=Mus musculus OX=10090 GN=Pdia3 PE=1 SV=2	64	38	310	38	56.6	Pdia3	9.08014e+06	4.81106e+06	5.8887e+06	2.122e+06	1.48851e+07	2.65175e+07	6.95367e+08	2.15295e+08
High	Master Protein	P26041	Moesin OS=Mus musculus OX=10090 GN=Msn PE=1 SV=3	72	49	303	37	67.7	Msn	1.53691e+07	8.88597e+06	1.05402e+07	938720	2.19616e+07	2.97499e+07	2.34214e+08	5.94673e+07
High	Master Protein	P63276	40S ribosomal protein S17 OS=Mus musculus OX=10090 GN=Rps17 PE=1 SV=2	73	14	299	14	15.5	Rps17	3.81004e+07	1.26155e+07	9.09556e+06	2.92018e+07	3.65202e+07	4.09136e+07	1.34993e+07	9.42485e+06
High	Master Protein	Q62191	E3 ubiquitin-protein ligase TRIM21 OS=Mus musculus OX=10090 GN=Trim21 PE=1 SV=1	48	27	292	2	54.1	Trim21	2.53599e+07	1.1528e+07	1.74808e+07	2.33408e+07	2.51835e+07	3.251e+07	4.03185e+06	4.60108e+06
High	Master Protein	Q3U7K7	RING-type E3 ubiquitin transferase OS=Mus musculus OX=10090 GN=Trim21 PE=1 SV=1	48	26	284	1	53.3	Trim21	1.97925e+06	1.32549e+06	1.71928e+06	439831	1.7797e+06	2.98218e+06	7.70516e+06
High	Master Protein	Q91V55	40S ribosomal protein S5 OS=Mus musculus OX=10090 GN=Rps5 PE=1 SV=1	57	16	282	16	22.9	Rps5	4.09361e+07	1.99875e+07	9.44333e+06	2.21082e+07	5.66892e+07	5.04107e+07	2.18606e+07	1.50117e+07
High	Master Protein	P63038	60 kDa heat shock protein, mitochondrial OS=Mus musculus OX=10090 GN=Hspd1 PE=1 SV=1	79	40	274	40	60.9	Hspd1	1.31176e+07	6.93345e+06	7.70827e+06	687219	1.76519e+07	2.09488e+07	2.57581e+08	1.06856e+08
High	Master Protein	Q6ZWV3	60S ribosomal protein L10 OS=Mus musculus OX=10090 GN=Rpl10 PE=1 SV=3	66	21	269	21	24.6	Rpl10; Rpl10-ps1	3.69639e+07	1.70128e+07	6.39765e+06	1.47099e+07	5.16932e+07	4.46203e+07	1.4446e+07	7.47867e+06
High	Master Protein	P11087	Collagen alpha-1(I) chain OS=Mus musculus OX=10090 GN=Col1a1 PE=1 SV=4	40	43	259	43	137.9	Col1a1	7.97253e+06	3.41209e+06	2.66787e+06	9.97102e+06	4.10362e+06	3.76124e+07	1.62449e+09	1.10895e+09
High	Master Protein	A2AVJ7	Ribosome-binding protein 1 OS=Mus musculus OX=10090 GN=Rrbp1 PE=1 SV=1	46	62	257	62	158.3	Rrbp1	5.0867e+06	2.49846e+06	3.71299e+06	319625	5.5039e+06	1.63925e+07	6.00637e+08	2.78961e+08
High	Master Protein	Q9CYI4	Putative RNA-binding protein Luc7-like 1 OS=Mus musculus OX=10090 GN=Luc7l PE=1 SV=2	51	26	255	18	43.9	Luc7l	1.50671e+07	8.64592e+06	1.37501e+07	3.39824e+06	1.58684e+07	1.35274e+07	5.21924e+06	2.96323e+06
High	Master Protein	P26039	Talin-1 OS=Mus musculus OX=10090 GN=Tln1 PE=1 SV=2	51	94	255	81	269.7	Tln1	1.00884e+06	888738	774781	554300	1.23838e+06	4.78543e+06	2.17656e+08	7.65645e+07
High	Master Protein	A0A0A6YVP0	Immunoglobulin heavy constant gamma 2B (Fragment) OS=Mus musculus OX=10090 GN=Ighg2b PE=1 SV=2	44	14	254	1	44.3		1.28148e+07	9.50949e+06	8.63058e+06	6.47344e+06	1.59729e+07	1.72737e+07	2.2027e+07	1.99815e+07
High	Master Protein	P62983	Ubiquitin-40S ribosomal protein S27a OS=Mus musculus OX=10090 GN=Rps27a PE=1 SV=2	69	15	253	7	17.9	Rps27a; Rps27a-ps2; LOC100042019	1.68326e+07	5.26997e+06	7.33172e+06	1.01028e+07	2.88782e+07	2.76159e+07	1.96575e+08	1.46319e+08
High	Master Protein	Q921I1	Serotransferrin OS=Mus musculus OX=10090 GN=Tf PE=1 SV=1	54	48	249	47	76.7	Trf	1.73839e+06	1.1419e+06	1.03698e+06	229306	5.87238e+06	1.88817e+07	7.34544e+08	4.23492e+08
High	Master Protein	P01027	Complement C3 OS=Mus musculus OX=10090 GN=C3 PE=1 SV=3	37	51	245	51	186.4	C3	9.35995e+06	6.40074e+06	7.36894e+06	1.01182e+06	1.05777e+07	1.42593e+07	7.60497e+07	4.4029e+07
High	Master Protein	P62631	Elongation factor 1-alpha 2 OS=Mus musculus OX=10090 GN=Eef1a2 PE=1 SV=1	30	12	245	1	50.4	Eef1a2								317242
High	Master Protein	P62830	60S ribosomal protein L23 OS=Mus musculus OX=10090 GN=Rpl23 PE=1 SV=1	69	11	241	11	14.9	Rpl23; LOC100044627; LOC100862455	3.3613e+07	1.50398e+07	1.16803e+07	2.10325e+07	4.81342e+07	5.13784e+07	2.21624e+07	9.90914e+06
High	Master Protein	E9Q447	Spectrin alpha chain, non-erythrocytic 1 OS=Mus musculus OX=10090 GN=Sptan1 PE=1 SV=1	59	116	240	2	285.2	Spna2; Sptan1	47499.8		43743.9				1.18486e+06	587665
High	Master Protein	P16546	Spectrin alpha chain, non-erythrocytic 1 OS=Mus musculus OX=10090 GN=Sptan1 PE=1 SV=4	58	116	239	2	284.4	Spna2; Sptan1	1.20287e+06	493369	1.20008e+06	756051	1.69221e+06	4.14799e+06	1.72992e+08	9.50134e+07
High	Master Protein	P62082	40S ribosomal protein S7 OS=Mus musculus OX=10090 GN=Rps7 PE=2 SV=1	76	19	236	19	22.1	Rps7	3.11838e+07	1.31634e+07	6.51336e+06	9.81003e+06	4.00394e+07	4.06336e+07	4.3345e+07	2.41897e+07
High	Master Protein	A0A0A0MQF6	Glyceraldehyde-3-phosphate dehydrogenase OS=Mus musculus OX=10090 GN=Gapdh PE=1 SV=1	58	19	231	2	38.6	Gapdh	1.10268e+07	6.57745e+06	1.71545e+06	2.87861e+06	1.97031e+07	2.19829e+07	1.39539e+08	1.22578e+08
High	Master Protein	P11276	Fibronectin OS=Mus musculus OX=10090 GN=Fn1 PE=1 SV=4	36	57	221	3	272.4	Fn1	6.78643e+06	2.98249e+06	5.66273e+06	547927	2.71042e+06	7.20404e+06	1.22572e+08	9.81014e+07
High	Master Protein	B2M1R6	Heterogeneous nuclear ribonucleoprotein K OS=Mus musculus OX=10090 GN=Hnrnpk PE=1 SV=1	65	30	220	1	48.5	Hnrnpk	4.44604e+06	2.71689e+06	3.0541e+06	646742	5.86677e+06	1.13697e+07	2.90921e+08	1.0541e+08
High	Master Protein	P61979	Heterogeneous nuclear ribonucleoprotein K OS=Mus musculus OX=10090 GN=Hnrnpk PE=1 SV=1	67	30	219	1	50.9	Hnrnpk					18356.5		510972	72273.5
High	Master Protein	Q921R2	40S ribosomal protein S13 OS=Mus musculus OX=10090 GN=Rps13 PE=1 SV=1	55	13	218	13	16.1	Rps13	3.66542e+07	1.72984e+07	1.13703e+07	1.36933e+07	4.08607e+07	4.75092e+07	5.91316e+06	4.03129e+06
High	Master Protein	A0A1D5RLD8	Glyceraldehyde-3-phosphate dehydrogenase OS=Mus musculus OX=10090 GN=Gm10358 PE=1 SV=1	62	18	216	1	35.8		208521	53445			172292	452610	2832000	2442611
High	Master Protein	A0A087WSN6	Fibronectin OS=Mus musculus OX=10090 GN=Fn1 PE=1 SV=1	38	55	213	1	252.9	Fn1							65565.7	76489.8
High	Master Protein	Q9D0E1	Heterogeneous nuclear ribonucleoprotein M OS=Mus musculus OX=10090 GN=Hnrnpm PE=1 SV=3	59	40	213	40	77.6	Hnrnpm	5.05568e+06	3.06138e+06	6.61681e+06	867819	4.81333e+06	1.04094e+07	2.80005e+08	1.07902e+08
High	Master Protein	P48962	ADP/ATP translocase 1 OS=Mus musculus OX=10090 GN=Slc25a4 PE=1 SV=4	65	21	212	11	32.9	Slc25a4	3.55048e+07	2.44982e+07	5.99689e+06	9.79087e+06	5.06931e+07	5.62084e+07	3.04082e+07	3.31523e+07
High	Master Protein	P97351	40S ribosomal protein S3a OS=Mus musculus OX=10090 GN=Rps3a PE=1 SV=3	71	23	210	23	29.9	Rps3a; Rps3a1	1.96689e+07	9.0412e+06	3.15218e+06	7.38494e+06	2.47678e+07	2.6105e+07	5.98193e+07	3.14067e+07
High	Master Protein	P08113	Endoplasmin OS=Mus musculus OX=10090 GN=Hsp90b1 PE=1 SV=2	46	37	210	35	92.4	Hsp90b1	1.19894e+07	7.16006e+06	7.03647e+06	955151	1.66989e+07	2.00978e+07	5.29482e+07	4.00508e+06
High	Master Protein	Q64727	Vinculin OS=Mus musculus OX=10090 GN=Vcl PE=1 SV=4	69	62	205	62	116.6	Vcl	1.34919e+06	1.34014e+06	1.41734e+06	1.2054e+06	3.17366e+06	1.01687e+07	2.87492e+08	8.49219e+07
High	Master Protein	A8DUK4	Beta-globin OS=Mus musculus OX=10090 GN=Hbb-bs PE=1 SV=1	96	16	203	10	15.7	Beta-s; Hbb-bs; Hbb-bt; Hbb-b1	6.61805e+06	4.27445e+06	4.00806e+06	1.73521e+06	1.07547e+07	6.73989e+07	9.86229e+08	9.0489e+08
High	Master Protein	P07901	Heat shock protein HSP 90-alpha OS=Mus musculus OX=10090 GN=Hsp90aa1 PE=1 SV=4	41	36	197	18	84.7	Hsp90aa1	5.8988e+06	3.21661e+06	2.82825e+06	251867	9.28826e+06	1.07584e+07	1.0061e+06	1.29711e+06
High	Master Protein	Q5SX40	Myosin-1 OS=Mus musculus OX=10090 GN=Myh1 PE=1 SV=1	50	100	197	17	223.2	Myh1	2.09475e+06	974194	5.90072e+06	410030	2.69695e+06	3.46211e+06	1.2971e+07	4.17918e+08
High	Master Protein	Q99KI0	Aconitate hydratase, mitochondrial OS=Mus musculus OX=10090 GN=Aco2 PE=1 SV=1	49	35	195	35	85.4	Aco2	1.74272e+06	1.13724e+06	1.10013e+06	166190	2.27532e+06	8.25298e+06	2.67158e+08	1.82659e+08
High	Master Protein	P51881	ADP/ATP translocase 2 OS=Mus musculus OX=10090 GN=Slc25a5 PE=1 SV=3	55	17	195	7	32.9	Slc25a5	7.0315e+06	4.52383e+06	1.27272e+06	3.40216e+06	9.84143e+06	1.05079e+07	6.94245e+06	6.79769e+06
High	Master Protein	P29341	Polyadenylate-binding protein 1 OS=Mus musculus OX=10090 GN=Pabpc1 PE=1 SV=2	63	32	193	23	70.6	Pabpc1	1.7148e+07	5.43677e+06	1.42418e+07	1.67451e+06	1.16342e+07	1.96297e+07	9.94557e+07	4.69587e+07
High	Master Protein	P62754	40S ribosomal protein S6 OS=Mus musculus OX=10090 GN=Rps6 PE=1 SV=1	50	18	191	18	28.7	Rps6-ps4; Rps6; LOC105244208	2.15791e+07	6.59627e+06	5.03872e+06	7.22449e+06	2.42352e+07	2.44281e+07	2.05334e+07	3.05518e+07
High	Master Protein	Q8CGP1	Histone H2B type 1-K OS=Mus musculus OX=10090 GN=H2bc12 PE=1 SV=3	59	9	191	9	13.9	Hist1h2bk	9.58678e+06	1.03569e+07	8.43429e+06	1.13898e+07	1.04522e+07	6.27819e+07	1.00488e+09	8.62685e+08
High	Master Protein	P14131	40S ribosomal protein S16 OS=Mus musculus OX=10090 GN=Rps16 PE=1 SV=4	60	12	190	12	16.4	Rps16-ps2; Rps16	3.21135e+07	1.48366e+07	8.2601e+06	1.1773e+07	3.30797e+07	4.50437e+07	3.28288e+07	2.66923e+07
High	Master Protein	P62806	Histone H4 OS=Mus musculus OX=10090 GN=H4c1 PE=1 SV=2	59	13	189	13	11.4	Hist4h4; Hist1h4a; Hist1h4k; Hist1h4c; Hist1h4i; Hist1h4n; Hist1h4h; Hist1h4f; Hist1h4j; Hist1h4b; Hist1h4m; Hist1h4d; Hist2h4; LOC100862646; LOC102641229	8.16113e+06	3.6633e+06	7.3827e+06	8.36182e+06	8.51934e+06	5.02286e+07	5.95773e+08	5.22731e+08
High	Master Protein	P62267	40S ribosomal protein S23 OS=Mus musculus OX=10090 GN=Rps23 PE=1 SV=3	57	9	182	9	15.8	Rps23	9.25261e+07	3.66349e+07	2.22085e+07	3.06538e+07	1.27103e+08	1.2858e+08	5.4989e+06	5.03222e+06
High	Master Protein	P05064	Fructose-bisphosphate aldolase A OS=Mus musculus OX=10090 GN=Aldoa PE=1 SV=2	73	29	180	29	39.3	Aldoa	6.23806e+06	4.05668e+06	1.22531e+06	858012	1.70722e+07	1.63473e+07	1.66156e+08	2.86732e+08
High	Master Protein	P01867	Ig gamma-2B chain C region OS=Mus musculus OX=10090 GN=Igh-3 PE=1 SV=3	39	13	180	2	44.2	Ighg2b	1.03781e+06	842486	144107	2.05238e+06	544012	4.09511e+06	757049	362400
High	Master Protein	P40142	Transketolase OS=Mus musculus OX=10090 GN=Tkt PE=1 SV=1	57	31	180	31	67.6	Tkt	3.09677e+06	2.18564e+06	2.2675e+06	82536.9	5.72758e+06	1.06338e+07	3.11993e+08	1.13775e+08
High	Master Protein	P09103	Protein disulfide-isomerase OS=Mus musculus OX=10090 GN=P4hb PE=1 SV=2	74	38	179	38	57	P4hb	4.76939e+06	3.18975e+06	3.78055e+06	345892	1.01131e+07	1.29453e+07	4.00366e+08	8.8978e+07
High	Master Protein	Q8VIJ6	Splicing factor, proline- and glutamine-rich OS=Mus musculus OX=10090 GN=Sfpq PE=1 SV=1	49	34	173	33	75.4	Sfpq	6.22957e+06	4.56785e+06	7.5517e+06	931425	8.00582e+06	1.59504e+07	2.6401e+08	1.22292e+08
High	Master Protein	G3UW82	Myosin, heavy polypeptide 2, skeletal muscle, adult OS=Mus musculus OX=10090 GN=Myh2 PE=1 SV=1	45	87	171	10	223.1	Myh2	73374.7	114825	129923	10742.9	270794	666013	9.68612e+06	3.24621e+07
High	Master Protein	Q8VH51	RNA-binding protein 39 OS=Mus musculus OX=10090 GN=Rbm39 PE=1 SV=2	52	24	171	5	59.4	Rbm39	1.13075e+07	6.03624e+06	9.14371e+06	3.56376e+06	8.86357e+06	1.27083e+07	700249	620968
High	Master Protein	P09411	Phosphoglycerate kinase 1 OS=Mus musculus OX=10090 GN=Pgk1 PE=1 SV=4	69	26	170	26	44.5	Pgk1	5.71366e+06	3.99681e+06	793571	591125	1.36642e+07	1.37019e+07	1.13157e+08	6.47616e+07
High	Master Protein	P62281	40S ribosomal protein S11 OS=Mus musculus OX=10090 GN=Rps11 PE=1 SV=3	73	20	168	20	18.4	Rps11	3.24213e+07	1.66984e+07	7.22293e+06	1.12065e+07	5.32642e+07	4.24839e+07	9.36454e+06	9.1776e+06
High	Master Protein	Q91VB8	Alpha globin 1 OS=Mus musculus OX=10090 GN=Hba-a1 PE=1 SV=1	92	10	166	10	15.1	Hba-a1; Hba-a2	4.57091e+06	1.21689e+06	2.77947e+06	513522	5.81325e+06	3.97516e+07	5.27419e+08	6.46321e+08
High	Master Protein	P14733	Lamin-B1 OS=Mus musculus OX=10090 GN=Lmnb1 PE=1 SV=3	75	51	166	43	66.7	Lmnb1	927430	912134	1.81627e+06	414487	1.55355e+06	6.93322e+06	2.89865e+08	1.35353e+08
High	Master Protein	Q01149	Collagen alpha-2(I) chain OS=Mus musculus OX=10090 GN=Col1a2 PE=1 SV=2	27	28	160	28	129.5	Col1a2	2.24272e+06	1.35836e+06	1.67452e+06	3.45763e+06	2.76832e+06	2.03886e+07	1.04001e+09	8.80262e+08
High	Master Protein	P62984	Ubiquitin-60S ribosomal protein L40 OS=Mus musculus OX=10090 GN=Uba52 PE=1 SV=2	51	9	159	1	14.7	Uba52; Gm11808				375116
High	Master Protein	Q91YQ5	Dolichyl-diphosphooligosaccharide--protein glycosyltransferase subunit 1 OS=Mus musculus OX=10090 GN=Rpn1 PE=1 SV=1	53	28	158	28	68.5	Rpn1	3.98515e+06	2.6625e+06	3.40072e+06	1.01922e+06	4.45387e+06	8.67976e+06	1.40452e+08	7.93116e+07
High	Master Protein	Q8VDN2	Sodium/potassium-transporting ATPase subunit alpha-1 OS=Mus musculus OX=10090 GN=Atp1a1 PE=1 SV=1	46	41	158	27	112.9	Atp1a1	3.40604e+06	2.34049e+06	3.2619e+06	4.44831e+06	3.56726e+06	1.1814e+07	2.50226e+08	1.41129e+08
High	Master Protein	O55143	Sarcoplasmic/endoplasmic reticulum calcium ATPase 2 OS=Mus musculus OX=10090 GN=Atp2a2 PE=1 SV=2	37	35	155	23	114.8	Atp2a2	4.40913e+06	3.70438e+06	3.61724e+06	901460	6.2758e+06	8.13653e+06	4.92383e+07	6.33685e+07
High	Master Protein	Q8VDJ3	Vigilin OS=Mus musculus OX=10090 GN=Hdlbp PE=1 SV=1	47	55	155	55	141.7	Hdlbp	1.81014e+06	1.44814e+06	1.66713e+06	221999	2.11968e+06	6.54473e+06	1.82321e+08	6.08844e+07
High	Master Protein	P51885	Lumican OS=Mus musculus OX=10090 GN=Lum PE=1 SV=2	43	17	154	17	38.2	Lum	1.03377e+06	378195	665808	19524.9	781366	9.92199e+06	5.25157e+08	2.91841e+08
High	Master Protein	P38647	Stress-70 protein, mitochondrial OS=Mus musculus OX=10090 GN=Hspa9 PE=1 SV=3	48	31	152	30	73.4	Hspa9	5.73616e+06	2.44723e+06	4.37349e+06	681139	6.82694e+06	8.2021e+06	1.09305e+08	4.97966e+07
High	Master Protein	P07356	Annexin A2 OS=Mus musculus OX=10090 GN=Anxa2 PE=1 SV=2	72	31	151	31	38.7	Anxa2	6.12276e+06	3.54719e+06	1.74226e+06	329980	1.2348e+07	1.56668e+07	1.07031e+08	5.04053e+07
High	Master Protein	Q9JI91	Alpha-actinin-2 OS=Mus musculus OX=10090 GN=Actn2 PE=1 SV=2	67	57	150	39	103.8	Actn2	1.6368e+06	539259	2.16006e+06	1.50668e+06	922760	2.00326e+06	2.6659e+07	1.87176e+08
High	Master Protein	Q78PY7	Staphylococcal nuclease domain-containing protein 1 OS=Mus musculus OX=10090 GN=Snd1 PE=1 SV=1	57	43	150	43	102	Snd1	1.64326e+06	1.14577e+06	1.10385e+06	180794	1.74761e+06	5.24848e+06	1.34518e+08	5.56177e+07
High	Master Protein	Q9CXW4	60S ribosomal protein L11 OS=Mus musculus OX=10090 GN=Rpl11 PE=1 SV=4	64	12	149	12	20.2	Rpl11	2.03296e+07	7.52547e+06	4.30499e+06	9.72909e+06	2.26539e+07	2.80863e+07	1.05866e+07	1.17472e+07
High	Master Protein	E9Q8F0	RNA-binding protein 39 OS=Mus musculus OX=10090 GN=Rbm39 PE=1 SV=1	57	20	147	1	47		298330	347780			116758	275601	587796	442847
High	Master Protein	Q80X90	Filamin-B OS=Mus musculus OX=10090 GN=Flnb PE=1 SV=3	37	71	146	62	277.7	Flnb	5.18832e+07	1.26793e+07	1.93867e+07	646829	2.50204e+07	9.10594e+07	8.25549e+07	7.08156e+07
High	Master Protein	P26043	Radixin OS=Mus musculus OX=10090 GN=Rdx PE=1 SV=3	37	25	146	13	68.5	Rdx	303912	271432	249398		610783	1.1419e+06	2.90201e+07	7.84229e+06
High	Master Protein	Q04447	Creatine kinase B-type OS=Mus musculus OX=10090 GN=Ckb PE=1 SV=1	67	19	145	18	42.7	Ckb	304814	262255	392192	93654.7	614910	6.08173e+06	1.22557e+08	1.08755e+08
High	Master Protein	Q61696	Heat shock 70 kDa protein 1A OS=Mus musculus OX=10090 GN=Hspa1a PE=1 SV=2	42	21	143	14	70	Hspa1a; Hspa1b	230274	403070	206286	138290	418286	588152	2.1982e+07	4.25347e+06
High	Master Protein	P48036	Annexin A5 OS=Mus musculus OX=10090 GN=Anxa5 PE=1 SV=1	76	26	142	26	35.7	Anxa5	2.60466e+06	1.66474e+06	464794	438914	4.52815e+06	1.12104e+07	1.67771e+08	8.55541e+07
High	Master Protein	P28653	Biglycan OS=Mus musculus OX=10090 GN=Bgn PE=1 SV=1	54	20	142	19	41.6	Bgn	606762	446365	406612	186517	925228	5.82497e+06	2.79353e+08	1.64631e+08
High	Master Protein	P13020	Gelsolin OS=Mus musculus OX=10090 GN=Gsn PE=1 SV=3	59	36	142	28	85.9	Gsn	1.40481e+07	1.06e+07	5798054	752048	2.2271e+07	2.83928e+07	3.65305e+08	1.47581e+08
High	Master Protein	P01872	Immunoglobulin heavy constant mu OS=Mus musculus OX=10090 GN=Ighm PE=1 SV=2	36	17	141	17	49.9	Ighm	9.26817e+06	5.47189e+06	7.48414e+06	2.23137e+06	1.02026e+07	1.36729e+07	1.66324e+07	9.63127e+06
High	Master Protein	Q8BHN3	Neutral alpha-glucosidase AB OS=Mus musculus OX=10090 GN=Ganab PE=1 SV=1	50	38	141	38	106.8	Ganab	1.7826e+06	3.59894e+07	721385	1.14248e+06	3.70471e+07	6.25896e+06	1.59381e+08	8.36148e+07
High	Master Protein	P97298	Pigment epithelium-derived factor OS=Mus musculus OX=10090 GN=Serpinf1 PE=1 SV=2	60	24	141	24	46.2	Serpinf1	988920	879491	723910	151187	1.1803e+06	7.34155e+06	3.32344e+08	2.858e+08
High	Master Protein	P62843	40S ribosomal protein S15 OS=Mus musculus OX=10090 GN=Rps15 PE=1 SV=2	61	7	140	7	17	Rps15	1.72056e+07	4.79702e+06	3.49612e+06	6.35178e+06	1.94542e+07	2.01151e+07	3.99404e+06	3.14146e+06
High	Master Protein	P80314	T-complex protein 1 subunit beta OS=Mus musculus OX=10090 GN=Cct2 PE=1 SV=4	72	32	140	32	57.4	Cct2	4.89263e+06	3.28746e+06	3.74856e+06	1.45841e+06	5.66134e+06	7.37822e+06	1.0966e+08	3.31805e+07
High	Master Protein	Q02053	Ubiquitin-like modifier-activating enzyme 1 OS=Mus musculus OX=10090 GN=Uba1 PE=1 SV=1	52	42	138	42	117.7	Uba1	1.06558e+06	1.1206e+06	827804	143120	2.1565e+06	4.50329e+06	1.38098e+08	4.13198e+07
High	Master Protein	A0A1C7CYV0	Plastin-3 (Fragment) OS=Mus musculus OX=10090 GN=Pls3 PE=1 SV=1	56	33	137	27	70.6		3.17436e+06	1.60384e+06	1.23424e+06	1.05974e+06	4.68226e+06	7.61337e+06	1.55372e+08	6.8929e+07
High	Master Protein	Q5SX39	Myosin-4 OS=Mus musculus OX=10090 GN=Myh4 PE=2 SV=1	40	73	136	11	222.7	Myh4	3964.83	11034.3				94039.7	393403	1.73848e+07
High	Master Protein	P08249	Malate dehydrogenase, mitochondrial OS=Mus musculus OX=10090 GN=Mdh2 PE=1 SV=3	65	19	134	19	35.6	Mdh2	3.54134e+06	2.08395e+06	679769	272335	6.36491e+06	9.77997e+06	1.30063e+08	1.36842e+08
High	Master Protein	P26040	Ezrin OS=Mus musculus OX=10090 GN=Ezr PE=1 SV=3	37	25	133	14	69.4	Ezr	192067	46973.7	212894	1.18587e+06	297273	783906	3.1677e+07	7.40357e+06
High	Master Protein	Q3UEB3	Poly(U)-binding-splicing factor PUF60 OS=Mus musculus OX=10090 GN=Puf60 PE=1 SV=2	36	16	132	16	60.2	Puf60	4.52154e+06	3.01266e+06	3.7734e+06	1.04986e+06	4.08694e+06	6.78191e+06	7.89211e+06	2.72421e+06
High	Master Protein	Q922I7	Polypyrimidine tract-binding protein 1 OS=Mus musculus OX=10090 GN=Ptbp1 PE=1 SV=1	51	19	132	16	59.3	Ptbp1	2.31431e+06	1.42824e+06	2.05359e+06	4.61156e+06	2.87726e+06	4.65028e+06	9.2101e+07	3.68464e+07
High	Master Protein	P26369	Splicing factor U2AF 65 kDa subunit OS=Mus musculus OX=10090 GN=U2af2 PE=1 SV=3	51	16	132	16	53.5	U2af2	5.8555e+06	1.92155e+06	3.84296e+06	1.63336e+06	4.31982e+06	4.64235e+06	8.11165e+06	2.42086e+06
High	Master Protein	A0A2R8VHP3	Predicted pseudogene 5478 OS=Mus musculus OX=10090 GN=Gm5478 PE=1 SV=1	18	13	131	4	57.9		9.04752e+06	4077594	5.40653e+06	1.2769e+06	3.6849e+06	5.90183e+07	4.88902e+06	9.66885e+06
High	Master Protein	A0A0A6YY53	Immunoglobulin heavy constant gamma 2C (Fragment) OS=Mus musculus OX=10090 GN=Ighg2c PE=1 SV=1	24	7	130	5	36.5	LOC100048855		67537.3	35691.3		35408.1	139268	6.16158e+06	2.74945e+07
High	Master Protein	Q61838	Pregnancy zone protein OS=Mus musculus OX=10090 GN=Pzp PE=1 SV=3	31	36	130	36	165.7	Pzp	6.03946e+06	4.76273e+06	3.57588e+06	1.75644e+06	8.57951e+06	1.17199e+07	4.38013e+07	2.49797e+07
High	Master Protein	Q6ZWN5	40S ribosomal protein S9 OS=Mus musculus OX=10090 GN=Rps9 PE=1 SV=3	65	19	127	19	22.6	Rps9	2.55512e+07	1.00587e+07	6.15474e+06	4.97038e+06	3.14487e+07	29426142	2.91556e+06	2.52459e+06
High	Master Protein	A0A0A6YXN4	Immunoglobulin heavy variable V1-18 (Fragment) OS=Mus musculus OX=10090 GN=Ighv1-18 PE=1 SV=1	39	4	125	2	12.9		2.03095e+08	1.79407e+08	1.83132e+08	5.18438e+07	2.39794e+08	2.67427e+08	3.05871e+06	6.12746e+06
High	Master Protein	E9PWE8	Dihydropyrimidinase-related protein 3 OS=Mus musculus OX=10090 GN=Dpysl3 PE=1 SV=1	57	29	124	24	73.8	Dpysl3	1.06823e+06	761052	850511	312000	1.78671e+06	4.15699e+06	1.45642e+08	5.27013e+07
High	Master Protein	Q99K48	Non-POU domain-containing octamer-binding protein OS=Mus musculus OX=10090 GN=Nono PE=1 SV=3	66	29	124	27	54.5	Nono	4.88185e+06	3.06602e+06	5.27219e+06	236332	8.1003e+06	8.02221e+06	1.27916e+08	5.99066e+07
High	Master Protein	P09242	Alkaline phosphatase, tissue-nonspecific isozyme OS=Mus musculus OX=10090 GN=Alpl PE=1 SV=2	54	26	123	26	57.5	Alpl	404976	208512	465764	272663	773002	5.3287e+06	2.91061e+08	1.38777e+08
High	Master Protein	Q9CZU6	Citrate synthase, mitochondrial OS=Mus musculus OX=10090 GN=Cs PE=1 SV=1	50	21	123	21	51.7	Cs	2.66573e+06	825375	626097	218820	3.30738e+06	6.07753e+06	1.32133e+08	1.27336e+08
High	Master Protein	Q9D8N0	Elongation factor 1-gamma OS=Mus musculus OX=10090 GN=Eef1g PE=1 SV=3	60	21	123	21	50	Eef1g	7.50039e+06	4.37176e+06	4.00096e+06	831270	1.09115e+07	1.70574e+07	1.57772e+08	7.8232e+07
High	Master Protein	Q64523	Histone H2A type 2-C OS=Mus musculus OX=10090 GN=H2ac20 PE=1 SV=3	59	8	123	2	14	Hist2h2ac	6.33511e+06	2.93629e+06	5.67915e+06	7.57633e+06	8.4989e+06	4.34607e+07	5.4075e+08	5.16095e+08
High	Master Protein	P70669	Phosphate-regulating neutral endopeptidase PHEX OS=Mus musculus OX=10090 GN=Phex PE=1 SV=1	52	33	122	33	86.4	Phex	1.17711e+06	1.22437e+06	1.42544e+06	21569.1	2.39782e+06	4.36221e+06	1.63411e+08	1.313e+08
High	Master Protein	O08553	Dihydropyrimidinase-related protein 2 OS=Mus musculus OX=10090 GN=Dpysl2 PE=1 SV=2	66	25	121	20	62.2	Dpysl2	1.46966e+07	8.06409e+06	4.38847e+06	95598.7	1.95589e+07	1.62222e+07	9.11678e+07	4.03094e+07
High	Master Protein	Q8BFU2	Histone H2A type 3 OS=Mus musculus OX=10090 GN=H2aw PE=1 SV=3	36	7	121	2	14.1	Hist3h2a	1.03356e+07	6369088	8.86682e+06	7074.79	9620605	7.9006e+06	2.27308e+07	3.3342e+07
High	Master Protein	P27546	Microtubule-associated protein 4 OS=Mus musculus OX=10090 GN=Map4 PE=1 SV=3	50	41	120	41	117.4	Map4; Mtap4	1.11411e+06	521484	779881	192635	2.01151e+06	4.44023e+06	1.33183e+08	5.64119e+07
High	Master Protein	Q6NVF9	Cleavage and polyadenylation specificity factor subunit 6 OS=Mus musculus OX=10090 GN=Cpsf6 PE=1 SV=1	27	15	119	15	59.1	Cpsf6	7.70256e+06	2.84613e+06	5.33374e+06	2.12417e+06	7.27834e+06	9.24246e+06	1.49394e+07	3.58124e+06
High	Master Protein	Q9JIF7	Coatomer subunit beta OS=Mus musculus OX=10090 GN=Copb1 PE=1 SV=1	48	34	118	34	107	Copb1	866593	379611	406119	974312	641479	2.92387e+06	9.04646e+07	4.19081e+07
High	Master Protein	P14824	Annexin A6 OS=Mus musculus OX=10090 GN=Anxa6 PE=1 SV=3	63	42	117	42	75.8	Anxa6	935134	552577	501957	220726	1.31067e+06	5.37117e+06	1.72745e+08	2.46301e+07
High	Master Protein	Q68FD5	Clathrin heavy chain 1 OS=Mus musculus OX=10090 GN=Cltc PE=1 SV=3	34	42	117	42	191.4	Cltc	1.92063e+06	1.02872e+06	1.49499e+06	107731	2.52195e+06	3.82865e+06	4.74231e+07	3.27924e+07
High	Master Protein	Q3UL36	Arginine and glutamate-rich protein 1 OS=Mus musculus OX=10090 GN=Arglu1 PE=1 SV=2	34	15	115	15	32.9	Arglu1	2.50128e+07	1.5387e+07	9.48061e+06	4.98737e+06	3.09501e+07	2.67458e+07	1.22171e+07	3.43599e+06
High	Master Protein	B7ZNH7	Collagen alpha-1(XIV) chain OS=Mus musculus OX=10090 GN=Col14a1 PE=1 SV=1	33	42	115	1	192.6	Col14a1	167466	286989	188863	38260	177898	915840	5.88746e+07	5.53852e+07
High	Master Protein	Q8C2Q7	Heterogeneous nuclear ribonucleoprotein H OS=Mus musculus OX=10090 GN=Hnrnph1 PE=1 SV=1	43	14	115	7	51.2	Hnrnph1	2.96401e+06	1.77829e+06	2.58692e+06	1.14338e+06	3.68893e+06	5.62331e+06	1.00803e+08	5.96706e+07
High	Master Protein	P13542	Myosin-8 OS=Mus musculus OX=10090 GN=Myh8 PE=2 SV=2	30	60	115	2	222.6	Myh8		29459.5			33169.2			1.28863e+06
High	Master Protein	Q8BMS1	Trifunctional enzyme subunit alpha, mitochondrial OS=Mus musculus OX=10090 GN=Hadha PE=1 SV=1	51	29	115	29	82.6	Hadha	1.35715e+06	1.26482e+06	1.22377e+06	387407	2.33231e+06	3.75572e+06	7.9288e+07	5.02901e+07
High	Master Protein	P14206	40S ribosomal protein SA OS=Mus musculus OX=10090 GN=Rpsa PE=1 SV=4	59	12	113	12	32.8	Rpsa; LOC100045332; LOC100505031; LOC102642689	3.45729e+06	2.81222e+06	961918	5.51345e+06	5.44939e+06	7.01425e+06	5.52747e+07	5.06643e+07
High	Master Protein	Q8CAQ8	MICOS complex subunit Mic60 OS=Mus musculus OX=10090 GN=Immt PE=1 SV=1	58	41	113	13	83.8	Immt	2.06954e+06	1.52741e+06	2.42035e+06	205139	2.578e+06	5.15097e+06	1.05082e+08	4.99661e+07
High	Master Protein	P63101	14-3-3 protein zeta/delta OS=Mus musculus OX=10090 GN=Ywhaz PE=1 SV=1	79	21	112	15	27.8	Ywhaz	1.81229e+06	1.19603e+06	247706	228201	5.54792e+06	6.34863e+06	1.14043e+08	7.50129e+07
High	Master Protein	Q60597	2-oxoglutarate dehydrogenase, mitochondrial OS=Mus musculus OX=10090 GN=Ogdh PE=1 SV=3	43	37	112	27	116.4	Ogdh	803972	407296	1.1729e+06	87982	1.36769e+06	3.22916e+06	1.04687e+08	6.86325e+07
High	Master Protein	Q6ZWV7	60S ribosomal protein L35 OS=Mus musculus OX=10090 GN=Rpl35 PE=1 SV=1	38	9	112	9	14.5	Rpl35	3.7027e+07	1.34334e+07	7.18236e+06	9.46165e+06	4.95177e+07	6.0379e+07	236042	75055.4
High	Master Protein	P28654	Decorin OS=Mus musculus OX=10090 GN=Dcn PE=1 SV=1	45	18	112	17	39.8	Dcn	402104	162904	358986	96109.1	449221	5.83405e+06	1.95492e+08	1.17425e+08
High	Master Protein	Q80X19	Collagen alpha-1(XIV) chain OS=Mus musculus OX=10090 GN=Col14a1 PE=1 SV=2	33	42	111	1	192.9	Col14a1				45040.4	13386.8		34185.1	58978.3
High	Master Protein	P31001	Desmin OS=Mus musculus OX=10090 GN=Des PE=1 SV=3	39	19	111	13	53.5	Des	175974	169538	120435	77929.1	244216	370556	1.62214e+06	9.48821e+06
High	Master Protein	P01644	Ig kappa chain V-V region HP R16.7 OS=Mus musculus OX=10090 PE=1 SV=1	68	8	110	5	11.9	Ce9	9.34084e+06	3.01548e+06	2.65363e+06	4.8038e+06	1.32318e+07	1.20625e+07	870838	1.66055e+06
High	Master Protein	A0A075B5Y4	Immunoglobulin heavy variable 1-81 (Fragment) OS=Mus musculus OX=10090 GN=Ighv1-81 PE=4 SV=1	21	2	109	1	13		1.52127e+06	599503	847388	1062613	1.07876e+06	2.51753e+06	17217.5
High	Master Protein	A0A1L1SQA8	40S ribosomal protein S25 OS=Mus musculus OX=10090 GN=Rps25 PE=1 SV=1	65	9	108	9	10.3		3.73257e+07	1.54301e+07	9.37382e+06	1.3466e+07	4.45618e+07	4.04531e+07	2.67364e+07	1.8176e+07
High	Master Protein	P47738	Aldehyde dehydrogenase, mitochondrial OS=Mus musculus OX=10090 GN=Aldh2 PE=1 SV=1	54	23	108	22	56.5	Aldh2	1.56227e+06	1.41027e+06	1.13231e+06	3.30163e+06	2.85343e+06	5.31308e+06	9.55565e+07	6.20962e+07
High	Master Protein	Q61656	Probable ATP-dependent RNA helicase DDX5 OS=Mus musculus OX=10090 GN=Ddx5 PE=1 SV=2	45	25	108	17	69.2	Ddx5	5.33078e+06	2.42436e+06	6.23579e+06	1.32906e+06	5.61982e+06	7.76936e+06	4.40197e+07	1.39031e+07
High	Master Protein	P80315	T-complex protein 1 subunit delta OS=Mus musculus OX=10090 GN=Cct4 PE=1 SV=3	57	26	108	26	58	Cct4	4.41338e+06	2.53662e+06	2.64041e+06	538068	6.59873e+06	7.07472e+06	8.32442e+07	2.67871e+07
High	Master Protein	P60843	Eukaryotic initiation factor 4A-I OS=Mus musculus OX=10090 GN=Eif4a1 PE=1 SV=1	46	19	107	8	46.1	Eif4a1	2.87448e+06	1.41786e+06	630016	286991	4.44431e+06	7.19085e+06	6.86794e+07	2.86544e+07
High	Master Protein	A0A0R4J0X5	Alpha-1-antitrypsin 1-3 OS=Mus musculus OX=10090 GN=Serpina1c PE=1 SV=1	52	16	105	6	45.8	Serpina1c	632523	235113	509495	491547	394736	1.14477e+06	6.81864e+07	3.22147e+07
High	Master Protein	Q02105	Complement C1q subcomponent subunit C OS=Mus musculus OX=10090 GN=C1qc PE=1 SV=2	31	7	105	7	26	C1qc	1.83261e+07	7.16914e+06	5.6034e+06	5.00579e+06	2.46409e+07	2.35633e+07	497358	408563
High	Master Protein	P54071	Isocitrate dehydrogenase [NADP], mitochondrial OS=Mus musculus OX=10090 GN=Idh2 PE=1 SV=3	55	25	105	24	50.9	Idh2	2.65468e+06	2.05943e+06	622182	1.77701e+06	3.22442e+06	5.19146e+06	7.73726e+07	6.03208e+07
High	Master Protein	P60335	Poly(rC)-binding protein 1 OS=Mus musculus OX=10090 GN=Pcbp1 PE=1 SV=1	53	12	104	8	37.5	Pcbp1	4.20262e+06	2.41409e+06	512039	1.57462e+06	7.44062e+06	6.42171e+06	3.27271e+07	1.80826e+07
High	Master Protein	Q3UPL0	Protein transport protein Sec31A OS=Mus musculus OX=10090 GN=Sec31a PE=1 SV=2	32	36	104	8	133.5	Sec31a	1.4648e+06	1.10314e+06	1.48116e+06	16827.2	2.19942e+06	5.21915e+06	1.25812e+08	5.38013e+07
High	Master Protein	P42932	T-complex protein 1 subunit theta OS=Mus musculus OX=10090 GN=Cct8 PE=1 SV=3	49	24	103	24	59.5	Cct8	4.14513e+06	2.42088e+06	2.78564e+06	559633	5.10921e+06	7.97378e+06	1.0288e+08	2.2604e+07
High	Master Protein	A0A1Y7VJN6	Immunoglobulin heavy constant gamma 3 (Fragment) OS=Mus musculus OX=10090 GN=Ighg3 PE=4 SV=1	44	13	102	13	44		8.24129e+06	3.72615e+06	5.93423e+06	2.26797e+06	5.70831e+06	1.04858e+07	4.13723e+07	3.84951e+07
High	Master Protein	Q3TML0	Protein disulfide-isomerase A6 OS=Mus musculus OX=10090 GN=Pdia6 PE=1 SV=1	42	15	102	1	48.7	Pdia6	1.84972e+06	1.41896e+06	1.10608e+06	343684	1.89397e+06	4.36719e+06	8.54838e+07	3.63819e+07
High	Master Protein	Q8R429	Sarcoplasmic/endoplasmic reticulum calcium ATPase 1 OS=Mus musculus OX=10090 GN=Atp2a1 PE=1 SV=1	35	34	102	22	109.4	Atp2a1	670571	122366	227106	214772	388488	405933	1.40321e+06	8.48483e+07
High	Master Protein	Q9CPR4	60S ribosomal protein L17 OS=Mus musculus OX=10090 GN=Rpl17 PE=1 SV=3	48	15	101	15	21.4	Rpl17	1.45928e+07	5.99465e+06	2.78125e+06	6.67563e+06	2.08285e+07	1.91406e+07	3.3887e+06	1.58503e+06
High	Master Protein	P11983	T-complex protein 1 subunit alpha OS=Mus musculus OX=10090 GN=Tcp1 PE=1 SV=3	53	23	100	23	60.4	Tcp1	4.10891e+06	2.7122e+06	2.7798e+06	60223.7	4.22149e+06	5.72831e+06	3.86679e+07	2.24702e+07
High	Master Protein	Q62318	Transcription intermediary factor 1-beta OS=Mus musculus OX=10090 GN=Trim28 PE=1 SV=3	33	22	100	22	88.8	Trim28	1.83661e+06	890104	1.33018e+06	2.66188e+06	2.17056e+06	4.70792e+06	8.40553e+07	3.52878e+07
High	Master Protein	P83882	60S ribosomal protein L36a OS=Mus musculus OX=10090 GN=Rpl36a PE=3 SV=2	48	11	99	11	12.4	Rpl36al; Rpl36a; Rpl36a-ps3	6.00997e+06	2.38392e+06	1.53565e+06	3.62083e+06	2.27194e+07	1.17784e+07	3.67419e+06	1.20872e+06
High	Master Protein	P40124	Adenylyl cyclase-associated protein 1 OS=Mus musculus OX=10090 GN=Cap1 PE=1 SV=4	68	26	99	26	51.5	Cap1	1.63023e+06	1.34178e+06	908798	432726	4.54387e+06	3.76708e+06	9.0732e+07	2.71759e+07
High	Master Protein	P21550	Beta-enolase OS=Mus musculus OX=10090 GN=Eno3 PE=1 SV=3	60	23	99	17	47	Eno3	1.06814e+06	355802	317745	33000.2	577457	2.51626e+06	8.62592e+06	3.74155e+07
High	Master Protein	Q8VHX6	Filamin-C OS=Mus musculus OX=10090 GN=Flnc PE=1 SV=3	24	50	99	38	290.9	Flnc	884722	636839	837594	113084	825986	1.13565e+06	1.22028e+07	2.5964e+07
High	Master Protein	P62242	40S ribosomal protein S8 OS=Mus musculus OX=10090 GN=Rps8 PE=1 SV=2	59	12	98	12	24.2	Rps8; Gm15501	8.21918e+06	1.8804e+06	891516	2.05636e+06	8.5596e+06	1.00703e+07	3.61067e+06	2.824e+06
High	Master Protein	Q9Z2X1	Heterogeneous nuclear ribonucleoprotein F OS=Mus musculus OX=10090 GN=Hnrnpf PE=1 SV=3	45	12	98	10	45.7	Hnrnpf	1.85464e+06	965001	1.1913e+06	198601	1.74064e+06	5.25524e+06	4.20797e+07	2.1302e+07
High	Master Protein	P70168	Importin subunit beta-1 OS=Mus musculus OX=10090 GN=Kpnb1 PE=1 SV=2	27	20	96	20	97.1	Kpnb1	2.82963e+06	2.25168e+06	2.2942e+06	2.21218e+06	4.53544e+06	4.51084e+06	5.50055e+07	9.16977e+06
High	Master Protein	P06151	L-lactate dehydrogenase A chain OS=Mus musculus OX=10090 GN=Ldha PE=1 SV=3	48	16	96	15	36.5	Ldha	4.27808e+06	2.77072e+06	683150	520119	1.08669e+07	7.97922e+06	49727909	4.32203e+07
High	Master Protein	Q922R8	Protein disulfide-isomerase A6 OS=Mus musculus OX=10090 GN=Pdia6 PE=1 SV=3	43	15	96	1	48.1	Pdia6	235324	110330	74573.6	114862	177204	326392
High	Master Protein	P62751	60S ribosomal protein L23a OS=Mus musculus OX=10090 GN=Rpl23a PE=1 SV=1	56	14	95	14	17.7	Rpl23a	1.57185e+07	6.13072e+06	3.98585e+06	2.69989e+06	2.05815e+07	2.07154e+07	1.2907e+07	4.22175e+06
High	Master Protein	P98086	Complement C1q subcomponent subunit A OS=Mus musculus OX=10090 GN=C1qa PE=1 SV=2	30	5	94	5	26	C1qa	7.27268e+06	2.45863e+06	1.74643e+06	2.40362e+06	7.93079e+06	1.07976e+07	1.44363e+06	228079
High	Master Protein	P26443	Glutamate dehydrogenase 1, mitochondrial OS=Mus musculus OX=10090 GN=Glud1 PE=1 SV=1	56	24	94	24	61.3	Glud1	1.62881e+06	899371	995043	107765	1.97062e+06	3.74217e+06	1.00288e+08	4.87268e+07
High	Master Protein	Q5SUF2	Luc7-like protein 3 OS=Mus musculus OX=10090 GN=Luc7l3 PE=1 SV=1	37	17	94	17	51.4	Luc7l3	6.7361e+06	3.56286e+06	5.11946e+06	1.28867e+06	6.3966e+06	7.29904e+06	1.44955e+07	9.98063e+06
High	Master Protein	A0A0R4J0G0	Phosphoenolpyruvate carboxykinase (GTP) OS=Mus musculus OX=10090 GN=Pck2 PE=1 SV=1	47	25	94	25	73.4	Pck2	1.14327e+06	473389	647450	174997	768835	1.99071e+06	8.87882e+07	6.44573e+07
High	Master Protein	Q8BH59	Calcium-binding mitochondrial carrier protein Aralar1 OS=Mus musculus OX=10090 GN=Slc25a12 PE=1 SV=1	47	25	93	21	74.5	Slc25a12	2.57168e+06	2.57495e+06	3.13996e+06	390583	2.22805e+06	4.29212e+06	1.9637e+07	1.8394e+07
High	Master Protein	Q9JKF1	Ras GTPase-activating-like protein IQGAP1 OS=Mus musculus OX=10090 GN=Iqgap1 PE=1 SV=2	30	37	93	35	188.6	Iqgap1	8.35612e+06	2.26335e+06	4.05649e+06	994753	3.73832e+06	1.11352e+07	1.06246e+08	3.56235e+07
High	Master Protein	Q62167	ATP-dependent RNA helicase DDX3X OS=Mus musculus OX=10090 GN=Ddx3x PE=1 SV=3	41	22	92	4	73.1	Ddx3x	3.48298e+06	2.07532e+06	2.90154e+06	878099	3.70997e+06	4.38542e+06	1.49419e+07	4.4704e+06
High	Master Protein	Q76MZ3	Serine/threonine-protein phosphatase 2A 65 kDa regulatory subunit A alpha isoform OS=Mus musculus OX=10090 GN=Ppp2r1a PE=1 SV=3	54	26	92	21	65.3	Ppp2r1a	845309	823514	516407	220343	1.36096e+06	2.67483e+06	7.76652e+07	2.26552e+07
High	Master Protein	Q00897	Alpha-1-antitrypsin 1-4 OS=Mus musculus OX=10090 GN=Serpina1d PE=1 SV=1	48	17	91	7	46	Serpina1d	1.83846e+06	1.22709e+06	1.97959e+06	362391	1.81528e+06	4.36512e+06	2.02888e+08	9.31276e+07
High	Master Protein	P15331	Peripherin OS=Mus musculus OX=10090 GN=Prph PE=1 SV=2	28	14	91	9	54.2	Prph	480767	25958.3	47218.9	69961.4	83220.8	509624	9.14092e+06	2.5429e+06
High	Master Protein	P22599	Alpha-1-antitrypsin 1-2 OS=Mus musculus OX=10090 GN=Serpina1b PE=1 SV=2	50	16	90	6	45.9	Serpina1b	101749	63552.5	128615		97209.4	570269	3.89285e+07	1.51784e+07
High	Master Protein	P80317	T-complex protein 1 subunit zeta OS=Mus musculus OX=10090 GN=Cct6a PE=1 SV=3	43	20	90	20	58	Cct6a	4.2217e+06	2.59844e+06	2.2513e+06	1.17674e+06	4.46376e+06	6.19743e+06	6.5667e+07	2.20289e+07
High	Master Protein	Q9D0K2	Succinyl-CoA:3-ketoacid coenzyme A transferase 1, mitochondrial OS=Mus musculus OX=10090 GN=Oxct1 PE=1 SV=1	50	18	89	18	56	Oxct1	553145	535439	433322	65627	1.10718e+06	2.24259e+06	7.61322e+07	4.18786e+07
High	Master Protein	P62264	40S ribosomal protein S14 OS=Mus musculus OX=10090 GN=Rps14 PE=1 SV=3	42	9	88	9	16.3	Rps14	1.01889e+07	3.81158e+06	2.81986e+06	2.82365e+06	9.33181e+06	1.39463e+07	1.4264e+07	1.29248e+07
High	Master Protein	P14106	Complement C1q subcomponent subunit B OS=Mus musculus OX=10090 GN=C1qb PE=1 SV=2	31	6	88	6	26.7	C1qb	1.49599e+07	7.13359e+06	3.83473e+06	5.12744e+06	1.32286e+07	1.74127e+07	1.48061e+06	1.31098e+06
High	Master Protein	P15864	Histone H1.2 OS=Mus musculus OX=10090 GN=H1-2 PE=1 SV=2	32	12	88	4	21.3	Hist1h1c	6.52466e+06	3.2459e+06	4.63524e+06	2.23206e+06	9.27269e+06	1.2914e+07	9.28621e+07	4.28511e+07
High	Master Protein	Q9JKR6	Hypoxia up-regulated protein 1 OS=Mus musculus OX=10090 GN=Hyou1 PE=1 SV=1	36	29	88	29	111.1	Hyou1	3.27248e+06	1.61112e+06	3.57923e+06	421530	871435	3.08858e+06	5.53328e+07	1.98076e+07
High	Master Protein	Q9R0B9	Procollagen-lysine,2-oxoglutarate 5-dioxygenase 2 OS=Mus musculus OX=10090 GN=Plod2 PE=1 SV=2	39	26	88	26	84.4	Plod2	392357	257808	442531	57687.1	643609	2.60991e+06	1.13346e+08	4.22255e+07
High	Master Protein	B1B0C7	Basement membrane-specific heparan sulfate proteoglycan core protein OS=Mus musculus OX=10090 GN=Hspg2 PE=1 SV=1	16	47	87	47	468.7	Hspg2	1.0407e+06	321205	421106	91903.4	677697	1.46052e+06	4.86909e+07	4.96635e+07
High	Master Protein	P06745	Glucose-6-phosphate isomerase OS=Mus musculus OX=10090 GN=Gpi PE=1 SV=4	48	23	87	23	62.7	Gpi1	1.84949e+06	1.17944e+06	1.12413e+06	94671.1	2.69385e+06	3.85907e+06	9.2635e+07	4.31595e+07
High	Master Protein	Q3U2G2	Heat shock 70 kDa protein 4 OS=Mus musculus OX=10090 GN=Hspa4 PE=1 SV=1	42	31	87	28	94.1	Hspa4	2.48423e+06	1.55528e+06	1.39018e+06	250281	4.16923e+06	5.19004e+06	6.5706e+07	2.11832e+07
High	Master Protein	P17742	Peptidyl-prolyl cis-trans isomerase A OS=Mus musculus OX=10090 GN=Ppia PE=1 SV=2	73	12	87	11	18	Ppia	1.14589e+06	582109	657282	665406	1.71468e+06	5.04237e+06	6.26456e+07	3.52231e+07
High	Master Protein	Q9CZX8	40S ribosomal protein S19 OS=Mus musculus OX=10090 GN=Rps19 PE=1 SV=3	58	13	86	13	16.1	Rps19	9.91598e+06	3.86162e+06	2.31005e+06	3.10328e+06	1.21783e+07	1.70954e+07	4.1208e+07	2.77124e+07
High	Master Protein	P80316	T-complex protein 1 subunit epsilon OS=Mus musculus OX=10090 GN=Cct5 PE=1 SV=1	62	26	86	26	59.6	Cct5	2.57833e+06	1.64837e+06	1.96098e+06	620475	3.27787e+06	4.49814e+06	4.24563e+07	1.16506e+07
High	Master Protein	P43274	Histone H1.4 OS=Mus musculus OX=10090 GN=H1-4 PE=1 SV=2	28	10	85	3	22	Hist1h1e	1.21642e+06	528355	1.02008e+06	1.01447e+06	1.4723e+06	1.85149e+06	1.88864e+07	6.74788e+06
High	Master Protein	P09405	Nucleolin OS=Mus musculus OX=10090 GN=Ncl PE=1 SV=2	29	18	85	18	76.7	Ncl	5.91352e+06	3.37203e+06	4.07317e+06	5.20191e+06	6.51238e+06	7.21908e+06	6.645e+06	1.41332e+06
High	Master Protein	A3KFU5	Polyadenylate-binding protein OS=Mus musculus OX=10090 GN=Pabpc4 PE=1 SV=1	31	18	85	9	69.4	Pabpc4	1.07121e+06	314874	763451	103050	865641	1.22331e+06	6.50849e+06	4.11925e+06
High	Master Protein	S4R2A9	Protein transport protein Sec31A (Fragment) OS=Mus musculus OX=10090 GN=Sec31a PE=1 SV=1	36	29	85	1	101		69090		79542.7				438936	191311
High	Master Protein	P10107	Annexin A1 OS=Mus musculus OX=10090 GN=Anxa1 PE=1 SV=2	71	24	84	23	38.7	Anxa1	2.64511e+06	1.7663e+06	254047	350733	4.98512e+06	5.10095e+06	6.324e+07	3.41397e+07
High	Master Protein	P43277	Histone H1.3 OS=Mus musculus OX=10090 GN=H1-3 PE=1 SV=2	28	10	84	1	22.1	Hist1h1d	1.15703e+06	539004	990352	1.4396e+06	1.77825e+06	2.49089e+06	3.08944e+07	9.81387e+06
High	Master Protein	P62259	14-3-3 protein epsilon OS=Mus musculus OX=10090 GN=Ywhae PE=1 SV=1	75	22	83	19	29.2	Ywhae	1.82215e+06	1.04706e+06	451649	53304.9	4.9445e+06	5.96375e+06	8.33515e+07	4.85534e+07
High	Master Protein	O88990	Alpha-actinin-3 OS=Mus musculus OX=10090 GN=Actn3 PE=2 SV=1	45	37	83	23	103	Actn3	820167	1.91252e+06	610722	156946	1.23513e+06	1.33743e+06	9.68554e+06	3.2756e+07
High	Master Protein	Q8VCQ8	Caldesmon 1 OS=Mus musculus OX=10090 GN=Cald1 PE=1 SV=1	43	29	83	29	60.4	Cald1	1.20728e+06	346703	343735	74608.8	1.33321e+06	4.53404e+06	1.31195e+08	2.56824e+07
High	Master Protein	Q91VD9	NADH-ubiquinone oxidoreductase 75 kDa subunit, mitochondrial OS=Mus musculus OX=10090 GN=Ndufs1 PE=1 SV=2	39	27	83	27	79.7	Ndufs1	690757	515045	631218	440314	2.04342e+06	2.02471e+06	5.97229e+07	4.56046e+07
High	Master Protein	P01670	Ig kappa chain V-III region PC 6684 OS=Mus musculus OX=10090 PE=1 SV=1	88	5	82	1	12	Igkv3-12	6.94661e+06	5.67197e+06	1.84085e+06	6.93064e+06	1.02285e+07	1.20329e+07	619998	756484
High	Master Protein	Q8VEM8	Phosphate carrier protein, mitochondrial OS=Mus musculus OX=10090 GN=Slc25a3 PE=1 SV=1	36	13	82	13	39.6	Slc25a3	1.0212e+07	5.18023e+06	2.26293e+06	1.40611e+06	1.5931e+07	1.32518e+07	1.00464e+07	1.37102e+07
High	Master Protein	P80313	T-complex protein 1 subunit eta OS=Mus musculus OX=10090 GN=Cct7 PE=1 SV=1	55	22	82	22	59.6	Cct7	3.13545e+06	2.30282e+06	2.39074e+06	261482	5.76985e+06	4.52745e+06	3.77541e+07	1.4223e+07
High	Master Protein	A0A0R4J0I1	Serine protease inhibitor A3K OS=Mus musculus OX=10090 GN=Serpina3k PE=1 SV=1	48	19	80	7	46.6	Serpina3k	1.21804e+06	3.89443e+06	833139	63023.9	637616	2.41629e+06	6.71988e+07	1.48426e+07
High	Master Protein	P10630	Eukaryotic initiation factor 4A-II OS=Mus musculus OX=10090 GN=Eif4a2 PE=1 SV=2	37	15	79	4	46.4	Eif4a2	150321	108986	94934.4		853093	552155	3.08868e+06	1.42454e+06
High	Master Protein	P70333	Heterogeneous nuclear ribonucleoprotein H2 OS=Mus musculus OX=10090 GN=Hnrnph2 PE=1 SV=1	33	11	79	5	49.2	Hnrnph2	27515.3	16360.4	34278.2		28006	186262	5.55849e+06	2.66217e+06
High	Master Protein	G3UVV4	Hexokinase OS=Mus musculus OX=10090 GN=Hk1 PE=1 SV=1	40	34	79	30	101.8	Hk1	918358	568037	583533	109969	1.14994e+06	3.06463e+06	9.05182e+07	4.47532e+07
High	Master Protein	A0A0U1RP81	MICOS complex subunit MIC60 OS=Mus musculus OX=10090 GN=Immt PE=1 SV=1	59	29	79	1	53.7		51353.8	22344.5	40080.4		51992.7	104075	4013188	1580936
High	Master Protein	Q501J6	Probable ATP-dependent RNA helicase DDX17 OS=Mus musculus OX=10090 GN=Ddx17 PE=1 SV=1	34	21	79	13	72.4	Ddx17	1.05893e+06	381631	665649	173579	604520	1.25357e+06	1.63067e+07	5.42869e+06
High	Master Protein	A0A0R4J0I9	Prolow-density lipoprotein receptor-related protein 1 OS=Mus musculus OX=10090 GN=Lrp1 PE=1 SV=1	11	40	79	40	504.4	Lrp1	790326	955881	2.23919e+06	242516	1.55075e+06	1.95243e+06	5.34396e+07	6.35966e+07
High	Master Protein	P80318	T-complex protein 1 subunit gamma OS=Mus musculus OX=10090 GN=Cct3 PE=1 SV=1	53	27	79	27	60.6	Cct3	3.05691e+06	2.0654e+06	6.91564e+06	51852.3	3.58134e+06	1.74203e+07	7.14559e+07	2.32892e+07
High	Master Protein	P07310	Creatine kinase M-type OS=Mus musculus OX=10090 GN=Ckm PE=1 SV=1	61	24	78	23	43	Ckm	470471	381897	400698	300434	898904	1.30939e+06	3.71223e+07	1.54193e+08
High	Master Protein	Q8BFR5	Elongation factor Tu, mitochondrial OS=Mus musculus OX=10090 GN=Tufm PE=1 SV=1	45	17	78	17	49.5	Tufm	2.35958e+06	1.74086e+06	693036	228205	3.45132e+06	5.22131e+06	5.15533e+07	3.30242e+07
High	Master Protein	Q02257	Junction plakoglobin OS=Mus musculus OX=10090 GN=Jup PE=1 SV=3	41	25	78	23	81.7	Jup	4.48919e+06	215106	556947	54307.9	829251	5.64929e+06	4.23449e+07	1.02341e+07
High	Master Protein	Q99KE1	NAD-dependent malic enzyme, mitochondrial OS=Mus musculus OX=10090 GN=Me2 PE=1 SV=1	57	27	78	27	65.8	Me2	2.36258e+06	3.49761e+06	1.3012e+06	104051	203124	3.61661e+06	7.27385e+07	4.56455e+07
High	Master Protein	Q6P5H2	Nestin OS=Mus musculus OX=10090 GN=Nes PE=1 SV=1	32	40	78	40	207	Nes	466949	526059	107084	38293.8	950259	1.34684e+06	6.14276e+07	5.58966e+07
High	Master Protein	P61255	60S ribosomal protein L26 OS=Mus musculus OX=10090 GN=Rpl26 PE=1 SV=1	54	13	77	13	17.2	Rpl26; Gm15772	1.1858e+07	3.63722e+06	2.43027e+06	1.07198e+06	1.2642e+07	1.3003e+07	1.75805e+07	1.35642e+07
High	Master Protein	P29699	Alpha-2-HS-glycoprotein OS=Mus musculus OX=10090 GN=Ahsg PE=1 SV=1	55	13	77	13	37.3	Ahsg	630925	566567	567134	971649	3.29661e+06	5.32147e+06	1.90556e+08	1.77035e+08
High	Master Protein	A0A075B5V6	Immunoglobulin heavy variable V1-42 OS=Mus musculus OX=10090 GN=Ighv1-42 PE=1 SV=1	51	4	77	2	10.8		2.75487e+06	1.37032e+06	952887	1.26329e+06	1.55283e+06	3.37641e+06	313304	332396
High	Master Protein	E9Q7G0	Nuclear mitotic apparatus protein 1 OS=Mus musculus OX=10090 GN=Numa1 PE=1 SV=1	30	45	77	45	235.5	Numa1	267634	175232	346707	161046	524328	1.31971e+06	5.18986e+07	2.23857e+07
High	Master Protein	Q61576	Peptidyl-prolyl cis-trans isomerase FKBP10 OS=Mus musculus OX=10090 GN=Fkbp10 PE=1 SV=2	40	24	77	23	64.7	Fkbp10	771751	712572	1.03227e+06	68947.1	1.16232e+06	5.79036e+06	1.77592e+08	1.14393e+08
High	Master Protein	A0A0G2JGX4	Sodium/potassium-transporting ATPase subunit alpha OS=Mus musculus OX=10090 GN=Atp1a3 PE=1 SV=1	19	17	76	1	112.9	Atp1a3	92930.5	93466.2	116867		96768.3	416430	2.02274e+07	1.19171e+07
High	Master Protein	A0A140T8Q3	Immunoglobulin kappa variable 6-17 (Fragment) OS=Mus musculus OX=10090 GN=Igkv6-17 PE=1 SV=2	45	5	75	1	12.8	Igkv6-17	900475	74977.3	43327.9	648964	636257	2.00336e+06	314815	81358.1
High	Master Protein	Q62261	Spectrin beta chain, non-erythrocytic 1 OS=Mus musculus OX=10090 GN=Sptbn1 PE=1 SV=2	24	42	75	42	274.1	Spnb2; Sptbn1	1.42079e+06	339661	1.03613e+06	164677	569662	2.32472e+06	4.82314e+07	2.50654e+07
High	Master Protein	P97807	Fumarate hydratase, mitochondrial OS=Mus musculus OX=10090 GN=Fh PE=1 SV=3	53	21	74	21	54.3	Fh1	443373	578106	419861	128201	868865	1.5856e+06	3.48941e+07	2.49345e+07
High	Master Protein	G5E924	Heterogeneous nuclear ribonucleoprotein L (Fragment) OS=Mus musculus OX=10090 GN=Hnrnpl PE=1 SV=1	40	21	73	21	66.9		1.09773e+06	228011	658249	73426.5	885596	3.22486e+06	1.22342e+08	5.55767e+07
High	Master Protein	P01654	Ig kappa chain V-III region PC 2880/PC 1229 OS=Mus musculus OX=10090 PE=1 SV=1	63	4	73	2	12		2.43259e+06	466935	459218	1.24556e+06	1.80401e+06	2.63568e+06	26410	101222
High	Master Protein	F7C9H0	Periostin (Fragment) OS=Mus musculus OX=10090 GN=Postn PE=1 SV=1	54	6	73	1	11.7		59496.9	14197.9	33056		82597.3	1.07247e+06	4.41051e+07	2.81152e+07
High	Master Protein	Q640N1	Adipocyte enhancer-binding protein 1 OS=Mus musculus OX=10090 GN=Aebp1 PE=1 SV=1	26	24	72	24	128.3	Aebp1	559160	455904	622355	26993.9	986524	3.19293e+06	1.35501e+08	8.06382e+07
High	Master Protein	Q04857	Collagen alpha-1(VI) chain OS=Mus musculus OX=10090 GN=Col6a1 PE=1 SV=1	24	22	72	22	108.4	Col6a1	151353	302335	564670	88739.9	416938	2.55446e+06	8.06382e+07	4.21245e+07
High	Master Protein	O88569	Heterogeneous nuclear ribonucleoproteins A2/B1 OS=Mus musculus OX=10090 GN=Hnrnpa2b1 PE=1 SV=2	56	18	72	16	37.4	Hnrnpa2b1	1.22738e+06	596116	335928	30492.3	2.18518e+06	4.04397e+06	1.09088e+08	8.29612e+07
High	Master Protein	Q80UM7	Mannosyl-oligosaccharide glucosidase OS=Mus musculus OX=10090 GN=Mogs PE=1 SV=1	36	22	72	22	91.8	Mogs	1.22461e+06	1.04815e+06	1.21485e+06	346602	1.77043e+06	3.07012e+06	2.65697e+07	1.87445e+07
High	Master Protein	Q62073	Mitogen-activated protein kinase kinase kinase 7 OS=Mus musculus OX=10090 GN=Map3k7 PE=1 SV=1	15	7	72	7	64.2	Map3k7	4.68153e+06	853017	901396	1.53791e+06	366215	376252	314770	245461
High	Master Protein	Q80YX1	Tenascin OS=Mus musculus OX=10090 GN=Tnc PE=1 SV=1	24	36	72	36	231.7	Tnc	1.3178e+06	1.47975e+06	1.2511e+06	76266.6	1.48569e+06	2.44457e+06	8.00193e+07	5.23463e+07
High	Master Protein	Q61598	Rab GDP dissociation inhibitor beta OS=Mus musculus OX=10090 GN=Gdi2 PE=1 SV=1	62	23	71	18	50.5	Gdi2	1.30163e+06	681015	590810	144017	1.30488e+06	2.69186e+06	5.66221e+07	2.19983e+07
High	Master Protein	D3YYN7	Sodium/potassium-transporting ATPase subunit alpha OS=Mus musculus OX=10090 GN=Atp1a2 PE=1 SV=1	21	16	71	2	103.5				24967.4		19374.9			243197
High	Master Protein	P28658	Ataxin-10 OS=Mus musculus OX=10090 GN=Atxn10 PE=1 SV=2	41	17	70	17	53.7	Atxn10	2.65659e+06	1.98893e+06	2.29203e+06	161273	2.87364e+06	3.73391e+06	1.03244e+07	4.61647e+06
High	Master Protein	Q61990	Poly(rC)-binding protein 2 OS=Mus musculus OX=10090 GN=Pcbp2 PE=1 SV=1	32	8	70	4	38.2	Pcbp2	1.84691e+06	1.94118e+06	1.84622e+06	220640	806889	722651	6.85225e+06	4.59349e+06
High	Master Protein	Q80YQ1	Thrombospondin-1 OS=Mus musculus OX=10090 GN=Thbs1 PE=1 SV=1	25	27	70	27	129.6	Thbs1	795451	530885	677418	143972	1.05378e+06	3.4078e+06	8.98702e+07	7.77416e+07
High	Master Protein	P56399	Ubiquitin carboxyl-terminal hydrolase 5 OS=Mus musculus OX=10090 GN=Usp5 PE=1 SV=1	48	26	70	26	95.8	Usp5	359048	256519	157067	287902	547006	1.26861e+06	4.62756e+07	1.44799e+07
High	Master Protein	Q62095	ATP-dependent RNA helicase DDX3Y OS=Mus musculus OX=10090 GN=Ddx3y PE=1 SV=2	30	19	69	1	73.4	Ddx3y	143653		41563.1		22932.7	184731	352634	122319
High	Master Protein	Q3U0V1	Far upstream element-binding protein 2 OS=Mus musculus OX=10090 GN=Khsrp PE=1 SV=2	40	25	69	24	76.7	Khsrp	1.38014e+06	6.83776e+06	1.22809e+06	336791	8.70294e+06	2.62103e+06	5.79847e+07	2.2595e+07
High	Master Protein	P01663	Ig kappa chain V-III region PC 4050 OS=Mus musculus OX=10090 PE=1 SV=1	53	3	69	1	12		905622	848791	275212	756382	1.24539e+06	1.90106e+06
High	Master Protein	Q9D824	Pre-mRNA 3'-end-processing factor FIP1 OS=Mus musculus OX=10090 GN=Fip1l1 PE=1 SV=1	41	17	69	17	64.9	Fip1l1	3.02861e+06	1.22143e+06	2.14296e+06	798525	2.39265e+06	3.26298e+06	2.5361e+06	1.64145e+06
High	Master Protein	Q91VN6	Probable ATP-dependent RNA helicase DDX41 OS=Mus musculus OX=10090 GN=Ddx41 PE=1 SV=2	44	24	69	24	69.8	Ddx41	3.51335e+06	2.56166e+06	3.15871e+06	1.22856e+06	4.30659e+06	6.64467e+06	1.88232e+07	1.12487e+07
High	Master Protein	Q61398	Procollagen C-endopeptidase enhancer 1 OS=Mus musculus OX=10090 GN=Pcolce PE=1 SV=2	49	16	69	16	50.1	Pcolce	1.48272e+06	1.23353e+06	1.51942e+06	329779	1.94879e+06	2.77607e+06	3.44011e+07	2.06899e+07
High	Master Protein	Q8K2B3	Succinate dehydrogenase [ubiquinone] flavoprotein subunit, mitochondrial OS=Mus musculus OX=10090 GN=Sdha PE=1 SV=1	42	22	69	22	72.5	Sdha	1.37398e+06	704149	612367	1.56781e+06	2.87747e+06	3.78291e+06	9.05512e+07	6.07327e+07
High	Master Protein	P50544	Very long-chain specific acyl-CoA dehydrogenase, mitochondrial OS=Mus musculus OX=10090 GN=Acadvl PE=1 SV=3	50	24	69	24	70.8	Acadvl	758874	349774	596542	176481	548560	1.77977e+06	4.71313e+07	3.40306e+07
High	Master Protein	P62892	60S ribosomal protein L39 OS=Mus musculus OX=10090 GN=Rpl39 PE=1 SV=2	24	2	68	2	6.4	Rpl39	15837364	1.34767e+06	921102	8.32039e+06	1.72875e+07	2.03973e+07	655346	333741
High	Master Protein	Q8QZT1	Acetyl-CoA acetyltransferase, mitochondrial OS=Mus musculus OX=10090 GN=Acat1 PE=1 SV=1	48	16	68	16	44.8	Acat1	502274	268204	140300	56732.1	636074	2.11649e+06	4.7135e+07	4.9935e+07
High	Master Protein	Q5XJY5	Coatomer subunit delta OS=Mus musculus OX=10090 GN=Arcn1 PE=1 SV=2	57	26	68	26	57.2	Arcn1	637648	660183	629335	20305.5	1.33911e+06	2.63524e+06	7.06654e+07	2.54251e+07
High	Master Protein	Q8VEK3	Heterogeneous nuclear ribonucleoprotein U OS=Mus musculus OX=10090 GN=Hnrnpu PE=1 SV=1	23	15	68	15	87.9	Hnrnpu	3.84699e+06	1.80026e+06	2.35913e+06	253779	3.92808e+06	4.7429e+06	2.69933e+07	3.94593e+06
High	Master Protein	P50580	Proliferation-associated protein 2G4 OS=Mus musculus OX=10090 GN=Pa2g4 PE=1 SV=3	43	18	68	18	43.7	Pa2g4	2.89137e+06	1.79766e+06	1.13702e+06	73171.3	4.12992e+06	4.59981e+06	4.24344e+07	1.80332e+07
High	Master Protein	Q9DB77	Cytochrome b-c1 complex subunit 2, mitochondrial OS=Mus musculus OX=10090 GN=Uqcrc2 PE=1 SV=1	44	18	67	18	48.2	Uqcrc2	786055	710127	447645	186942	1.11887e+06	2.60368e+06	6.19473e+07	5.26634e+07
High	Master Protein	P01660	Ig kappa chain V-III region PC 3741/TEPC 111 OS=Mus musculus OX=10090 PE=1 SV=1	49	3	67	1	12.1	LOC676215	3.74529e+06	2.37163e+06	1.12059e+06	984468	5.74497e+06	4.93143e+06	226517	247050
High	Master Protein	E9Q8K5	Titin OS=Mus musculus OX=10090 GN=Ttn PE=1 SV=1	3	64	67	64	3713.7		462870	275191	304793	144578	418102	866356	4.73437e+06	1.57795e+07
High	Master Protein	P25444	40S ribosomal protein S2 OS=Mus musculus OX=10090 GN=Rps2 PE=1 SV=3	47	13	66	13	31.2	Rps2; Rps2-ps13	5.57092e+06	2.82759e+06	924763	1.0234e+06	7.93031e+06	6.96139e+06	2.15675e+07	1.50363e+07
High	Master Protein	Q8CGC7	Bifunctional glutamate/proline--tRNA ligase OS=Mus musculus OX=10090 GN=Eprs1 PE=1 SV=4	28	31	66	31	170	Eprs	770818	615755	920646	178481	1.01187e+06	2.57126e+06	4.50808e+07	1.30787e+07
High	Master Protein	Q8K0E8	Fibrinogen beta chain OS=Mus musculus OX=10090 GN=Fgb PE=1 SV=1	47	21	66	21	54.7	Fgb	1.10516e+06	665708	748229	11159.6	1.55616e+06	2.92249e+06	8.22694e+07	3.61801e+07
High	Master Protein	P01643	Ig kappa chain V-V region MOPC 173 OS=Mus musculus OX=10090 PE=1 SV=1	43	4	66	1	11.8			16816.3				115205
High	Master Protein	Q62000	Mimecan OS=Mus musculus OX=10090 GN=Ogn PE=1 SV=1	39	12	66	12	34	Ogn	153729	111695	63456.7	5288.7	201466	1.83938e+06	4.78512e+07	4.53349e+07
High	Master Protein	Q9DBJ1	Phosphoglycerate mutase 1 OS=Mus musculus OX=10090 GN=Pgam1 PE=1 SV=3	64	13	66	9	28.8	Pgam1	1.93503e+06	814489	214375	196139	3.67041e+06	4.91107e+06	4.29236e+07	4.07767e+07
High	Master Protein	Q9CQV8	14-3-3 protein beta/alpha OS=Mus musculus OX=10090 GN=Ywhab PE=1 SV=3	48	14	65	6	28.1	Ywhab	316177	147469	14123.7		574346	804865	1.77561e+07	1.11284e+07
High	Master Protein	Q02788	Collagen alpha-2(VI) chain OS=Mus musculus OX=10090 GN=Col6a2 PE=1 SV=3	25	23	65	23	110.3	Col6a2	582505	251826	429545	3320.18	510210	2.94844e+06	9.51801e+07	4.71548e+07
High	Master Protein	P27661	Histone H2AX OS=Mus musculus OX=10090 GN=H2ax PE=1 SV=2	32	6	65	1	15.1	H2afx		36735.7					2.96282e+06	1.59829e+06
High	Master Protein	P07759	Serine protease inhibitor A3K OS=Mus musculus OX=10090 GN=Serpina3k PE=1 SV=2	41	15	65	3	46.9	Serpina3k	199720	125785	207771	2804.58	110808	256865	305775	236088
High	Master Protein	Q8BGQ7	Alanine--tRNA ligase, cytoplasmic OS=Mus musculus OX=10090 GN=Aars1 PE=1 SV=1	31	25	64	25	106.8	Aars	1.27915e+06	1.53676e+06	903410	17478.7	1.88557e+06	2.11761e+06	3.52727e+07	1.55621e+07
High	Master Protein	P03977	Ig kappa chain V-III region 50S10.1 OS=Mus musculus OX=10090 PE=1 SV=1	41	3	64	1	12		327074	282730	50916.9		617645	492433
High	Master Protein	A0A0A6YYE7	Immunoglobulin kappa variable 4-57 (Fragment) OS=Mus musculus OX=10090 GN=Igkv4-57 PE=4 SV=2	39	3	64	1	12.7	Igkv4-57	3.91649e+06	980186	977053	992459	1.43846e+06	3.71373e+06	396605
High	Master Protein	Q5SV64	Myosin-10 OS=Mus musculus OX=10090 GN=Myh10 PE=1 SV=1	19	30	64	19	232.3	Myh10	690137	378776	509602		1.0679e+06	990005	6.21294e+06	2.28631e+06
High	Master Protein	O08749	Dihydrolipoyl dehydrogenase, mitochondrial OS=Mus musculus OX=10090 GN=Dld PE=1 SV=2	44	17	63	17	54.2	Dld	889472	460301	477682	13323.7	1.1418e+06	1.90542e+06	7.0548e+07	3.86675e+07
High	Master Protein	Q9DBG6	Dolichyl-diphosphooligosaccharide--protein glycosyltransferase subunit 2 OS=Mus musculus OX=10090 GN=Rpn2 PE=1 SV=1	31	15	63	15	69	Rpn2	1.16051e+06	1.05124e+06	879798	22536.6	1.79566e+06	2.64955e+06	1.5409e+07	1.02333e+07
High	Master Protein	Q9D0F9	Phosphoglucomutase-1 OS=Mus musculus OX=10090 GN=Pgm1 PE=1 SV=4	60	26	63	26	61.4	Pgm2	985528	804477	666230	449610	1.29845e+06	2.15979e+06	4.72461e+07	2.64386e+07
High	Master Protein	Q62465	Synaptic vesicle membrane protein VAT-1 homolog OS=Mus musculus OX=10090 GN=Vat1 PE=1 SV=3	52	17	63	17	43.1	Vat1	1.11001e+06	933643	849550	4619.52	1.2117e+06	3.15314e+06	5.72591e+07	3.36612e+07
High	Master Protein	Q9CZ13	Cytochrome b-c1 complex subunit 1, mitochondrial OS=Mus musculus OX=10090 GN=Uqcrc1 PE=1 SV=2	46	17	62	16	52.8	Uqcrc1	357406	260063	264359	41785.2	464267	1.33563e+06	5.69261e+07	4.67238e+07
High	Master Protein	P50516	V-type proton ATPase catalytic subunit A OS=Mus musculus OX=10090 GN=Atp6v1a PE=1 SV=2	57	27	62	27	68.3	Atp6v1a	2.91044e+06	1.86365e+06	2.8742e+06	71138.3	1.51294e+06	4.06542e+06	7.40464e+07	2.75142e+07
High	Master Protein	P63325	40S ribosomal protein S10 OS=Mus musculus OX=10090 GN=Rps10 PE=1 SV=1	41	8	61	7	18.9	Rps10	2.63606e+06	736897	431714	76392.1	1.85519e+06	3.87274e+06	1.13854e+07	1.07966e+07
High	Master Protein	P62849	40S ribosomal protein S24 OS=Mus musculus OX=10090 GN=Rps24 PE=1 SV=1	41	6	61	6	15.4	Rps24; LOC677113; LOC102642752	3.43646e+06	1.46551e+06	1.07889e+06	1.66776e+06	3.52487e+06	5.094e+06	1.18442e+06	947901
High	Master Protein	Q9D8E6	60S ribosomal protein L4 OS=Mus musculus OX=10090 GN=Rpl4 PE=1 SV=3	40	16	61	16	47.1	Rpl4	3.05869e+06	1.53298e+06	1.50703e+06	180671	3.88698e+06	5.18777e+06	4.51322e+07	2.57521e+07
High	Master Protein	P51410	60S ribosomal protein L9 OS=Mus musculus OX=10090 GN=Rpl9 PE=2 SV=2	48	8	61	8	21.9	Rpl9	2.63119e+06	1.03274e+06	444762	620523	2.6281e+06	3.43614e+06	4.08554e+06	3.1357e+06
High	Master Protein	Q9CWJ9	Bifunctional purine biosynthesis protein ATIC OS=Mus musculus OX=10090 GN=Atic PE=1 SV=2	56	24	61	24	64.2	Atic	2.97158e+06	1.61194e+07	2.85973e+06	221201	1.31183e+06	3.02884e+06	2.78454e+07	9.88236e+06
High	Master Protein	Q9JHU4	Cytoplasmic dynein 1 heavy chain 1 OS=Mus musculus OX=10090 GN=Dync1h1 PE=1 SV=2	12	43	61	43	531.7	Dync1h1	728457	616597	689210	176621	502101	1.34925e+06	1.91587e+07	8.61172e+06
High	Master Protein	E9PZF0	Nucleoside diphosphate kinase OS=Mus musculus OX=10090 GN=Gm20390 PE=3 SV=1	63	11	61	4	30.2		3.75066e+06	1.01075e+06	585894	140104	2.17353e+06	6.51877e+06	6.99439e+07	5.85824e+07
High	Master Protein	Q3V1T4	Prolyl 3-hydroxylase 1 OS=Mus musculus OX=10090 GN=P3h1 PE=1 SV=2	40	25	61	25	83.6	Lepre1; P3h1	405692	131578	300098	528256	460133	1.69929e+06	8.70537e+07	4.27388e+07
High	Master Protein	A0A0R4J259	Heterogeneous nuclear ribonucleoprotein Q OS=Mus musculus OX=10090 GN=Syncrip PE=1 SV=1	42	21	60	17	62.5	Syncrip	1.20614e+06	642406	1.08e+06	264647	1.70264e+06	2.72483e+06	5.34769e+07	2.23443e+07
High	Master Protein	A0A140T8N3	Immunoglobulin kappa chain variable 13-84 (Fragment) OS=Mus musculus OX=10090 GN=Igkv13-84 PE=4 SV=2	37	4	60	3	12.6	Igkv13-84	6.62034e+06	1.79753e+06	677877	2.46847e+06	4.28856e+06	6.60481e+06		137677
High	Master Protein	Q61391	Neprilysin OS=Mus musculus OX=10090 GN=Mme PE=1 SV=3	40	22	60	22	85.6	Mme	122583	104134	21649.9	18194.5	186761	820188	5.28046e+07	3.34393e+07
High	Master Protein	P01638	Ig kappa chain V-V region L6 (Fragment) OS=Mus musculus OX=10090 PE=4 SV=1	41	4	59	3	13	Igk-V9; Igkv14-111	3.62951e+06	2.24971e+06	821010	2.88215e+06	4.51187e+06	4.6781e+06	304417	436606
High	Master Protein	A0A140T8N9	Immunoglobulin kappa variable 6-32 (Fragment) OS=Mus musculus OX=10090 GN=Igkv6-32 PE=4 SV=2	45	5	59	3	12.6	Igkv6-32	7.56203e+06	2.1121e+06	1.18124e+06	4.58462e+06	1.12344e+07	9.90895e+06	7.74372e+06	6.85101e+06
High	Master Protein	Q02819	Nucleobindin-1 OS=Mus musculus OX=10090 GN=Nucb1 PE=1 SV=2	60	25	59	25	53.4	Nucb1	454457	297582	437781	185761	268647	1.60161e+06	7.01283e+07	3.27554e+07
High	Master Protein	Q60932	Voltage-dependent anion-selective channel protein 1 OS=Mus musculus OX=10090 GN=Vdac1 PE=1 SV=3	68	15	59	3	32.3	Vdac1	707415	211467	59574.4	43456.5	1.26275e+06	2.37799e+06	3.37156e+07	4.07431e+07
High	Master Protein	P17427	AP-2 complex subunit alpha-2 OS=Mus musculus OX=10090 GN=Ap2a2 PE=1 SV=2	39	26	58	19	104	Ap2a2	438197	445015	462764	140532	788600	1.27113e+06	2.7462e+07	1.21052e+07
High	Master Protein	Q61140	Breast cancer anti-estrogen resistance protein 1 OS=Mus musculus OX=10090 GN=Bcar1 PE=1 SV=2	30	17	58	17	94.2	Bcar1	1.95596e+06	1.55663e+06	1.77575e+06	230494	2.78339e+06	2.38843e+06	660717	445011
High	Master Protein	P02089	Hemoglobin subunit beta-2 OS=Mus musculus OX=10090 GN=Hbb-b2 PE=1 SV=2	45	7	58	1	15.9	Hbb-b2	37403.7	47708	140674		86672.7	384864	3.19516e+06	3.75012e+06
High	Master Protein	Q3THW5	Histone H2A.V OS=Mus musculus OX=10090 GN=H2az2 PE=1 SV=3	31	5	58	3	13.5	H2afv	66708.6	46860	30946.2	130953	56789.9	869663	1.71175e+07	1.25374e+07
High	Master Protein	Q99JY0	Trifunctional enzyme subunit beta, mitochondrial OS=Mus musculus OX=10090 GN=Hadhb PE=1 SV=1	50	18	58	18	51.4	Hadhb	830095	930359	747451	28411.3	1.12089e+06	2.27826e+06	4.05224e+07	3.41345e+07
High	Master Protein	P61982	14-3-3 protein gamma OS=Mus musculus OX=10090 GN=Ywhag PE=1 SV=2	46	14	57	6	28.3	Ywhag	1.42721e+06	876930	183650	46298.3	3.56455e+06	3.3444e+06	5.40517e+07	3.40276e+07
High	Master Protein	Q8BMF4	Dihydrolipoyllysine-residue acetyltransferase component of pyruvate dehydrogenase complex, mitochondrial OS=Mus musculus OX=10090 GN=Dlat PE=1 SV=2	36	17	57	17	67.9	Dlat	535815	574804	499586	164460	881046	1.89529e+06	4.51966e+07	3.00068e+07
High	Master Protein	Q99K41	EMILIN-1 OS=Mus musculus OX=10090 GN=Emilin1 PE=1 SV=1	33	27	57	27	107.5	Emilin1	255838	333317	248327	365930	590537	1.23226e+06	4.69756e+07	3.37291e+07
High	Master Protein	A0A140T8M5	Immunoglobulin kappa variable 6-15 (Fragment) OS=Mus musculus OX=10090 GN=Igkv6-15 PE=1 SV=2	40	4	57	3	12.7	Igkv6-15	5.15252e+06	2.06824e+06	739766	1.03778e+06	4.85488e+06	5.06028e+06	513037	1.01216e+06
High	Master Protein	Q8BKG3	Inactive tyrosine-protein kinase 7 OS=Mus musculus OX=10090 GN=Ptk7 PE=1 SV=1	36	26	57	26	117.5	Ptk7	427581	257611	434963	14148.7	499354	2.0748e+06	5.5169e+07	3.15842e+07
High	Master Protein	Q80UG5	Septin-9 OS=Mus musculus OX=10090 GN=Septin9 PE=1 SV=1	33	17	57	17	65.5	Sept9	1.24994e+06	708253	895370	524418	1.43851e+06	3.06118e+06	4.91934e+07	1.78165e+07
High	Master Protein	P62814	V-type proton ATPase subunit B, brain isoform OS=Mus musculus OX=10090 GN=Atp6v1b2 PE=1 SV=1	61	21	57	21	56.5	Atp6v1b2	256290	218998	178007		350536	807312	3.19008e+07	9.72062e+06
High	Master Protein	Q62351	Transferrin receptor protein 1 OS=Mus musculus OX=10090 GN=Tfrc PE=1 SV=1	36	23	56	23	85.7	Tfrc	2.51071e+06	694405	820411	296566	1.10453e+06	5.22097e+06	4.61214e+07	9.09693e+06
High	Master Protein	A0A494BBA8	40S ribosomal protein S30 OS=Mus musculus OX=10090 GN=Fau PE=1 SV=1	12	4	55	4	10.9		5.40353e+06	820018	603481	4.12645e+07	2.60467e+06	1.37234e+07	870818	511995
High	Master Protein	Q8VCM7	Fibrinogen gamma chain OS=Mus musculus OX=10090 GN=Fgg PE=1 SV=1	41	15	55	15	49.4	Fgg	615594	356407	480509	5860.98	584579	1.809e+06	5.56118e+07	3.46478e+07
High	Master Protein	P01807	Ig heavy chain V region X44 OS=Mus musculus OX=10090 PE=1 SV=1	62	7	55	3	13.2		2.5426e+06	1.39974e+06	1.82726e+06	1.15929e+06	2.74533e+06	3.03962e+06	709300	552942
High	Master Protein	P01665	Ig kappa chain V-III region PC 7043 OS=Mus musculus OX=10090 PE=1 SV=1	53	3	55	2	12	Igkv3-4	436030	187742	80683.7	622822	543820	925750	34980.2
High	Master Protein	Q61768	Kinesin-1 heavy chain OS=Mus musculus OX=10090 GN=Kif5b PE=1 SV=3	46	37	55	37	109.5	Kif5b	372495	449778	377029	47150.2	1.01823e+06	1.78197e+06	6.18169e+07	2.9547e+07
High	Master Protein	Q99MN1	Lysine--tRNA ligase OS=Mus musculus OX=10090 GN=Kars1 PE=1 SV=1	32	18	55	18	67.8	Kars	1.29914e+06	810108	1.09402e+06	105145	1.26502e+06	2.11884e+06	2.45221e+07	1.29311e+07
High	Master Protein	A0A5H1ZRL7	Transformation-related protein 53-binding protein 1 OS=Mus musculus OX=10090 GN=Trp53bp1 PE=1 SV=1	14	20	55	20	207.5		3.45963e+06	1.06878e+06	2.36872e+06	1.39079e+06	2.38296e+06	2.19897e+06	7.785e+07	6.24071e+07
High	Master Protein	P68254	14-3-3 protein theta OS=Mus musculus OX=10090 GN=Ywhaq PE=1 SV=1	46	13	54	7	27.8	Ywhaq; LOC102634437; Gm11226; Ywhaq-ps3; Cdk5rap2	285872	177540	55187.3	23613.2	923599	894782	1.3579e+07	8.05852e+06
High	Master Protein	Q60604	Adseverin OS=Mus musculus OX=10090 GN=Scin PE=1 SV=3	47	26	54	26	80.2	Scin	441226	231755	55340.4	75413.4	395350	1.05913e+06	5.31383e+07	2.57391e+07
High	Master Protein	Q6P5F9	Exportin-1 OS=Mus musculus OX=10090 GN=Xpo1 PE=1 SV=1	28	24	54	24	123	Xpo1	1.65712e+06	801098	1.09252e+06	1.20552e+07	1.44603e+06	2.32585e+06	1.60794e+07	5.03195e+06
High	Master Protein	E9PV24	Fibrinogen alpha chain OS=Mus musculus OX=10090 GN=Fga PE=1 SV=1	25	17	54	17	87.4	Fga	731661	285754	468961	52858.2	853973	1.99933e+06	6.60063e+07	3.1109e+07
High	Master Protein	E9Q1S3	Protein transport protein SEC23 OS=Mus musculus OX=10090 GN=Sec23a PE=1 SV=1	29	18	54	15	82.9		429864	319421	329994	53311.3	568961	2.34977e+06	6.90469e+07	3.48559e+07
High	Master Protein	Q60864	Stress-induced-phosphoprotein 1 OS=Mus musculus OX=10090 GN=Stip1 PE=1 SV=1	46	25	54	25	62.5	Stip1	742618	966194	503758	114926	2.27077e+06	3.2391e+06	5.50513e+07	1.53348e+07
High	Master Protein	F8WJ41	40S ribosomal protein S15a (Fragment) OS=Mus musculus OX=10090 GN=Rps15a PE=1 SV=1	59	8	53	8	12.3		6.8591e+06	3.90847e+06	1.4683e+06	649228	8.67063e+06	9.91281e+06	8.87291e+06	9.4878e+06
High	Master Protein	P97449	Aminopeptidase N OS=Mus musculus OX=10090 GN=Anpep PE=1 SV=4	35	25	53	25	109.6	Anpep	7.95774e+06	845180	1.05463e+06	163628	1.44929e+06	5.17863e+06	1.01701e+08	3.68445e+07
High	Master Protein	Q00623	Apolipoprotein A-I OS=Mus musculus OX=10090 GN=Apoa1 PE=1 SV=2	60	20	53	20	30.6	Apoa1	875340	554589	393563	16553.3	1.07465e+06	3.07981e+06	6.59838e+07	5.71696e+07
High	Master Protein	P84228	Histone H3.2 OS=Mus musculus OX=10090 GN=H3c2 PE=1 SV=2	52	7	53	7	15.4	Hist1h3d; Hist1h3f; Hist2h3c1; Hist2h3b; Hist2h3c2; Hist1h3c; Hist1h3e; Hist1h3b	6.87864e+06	2.78543e+06	5.02843e+06	2.86815e+06	4.49095e+06	2.59953e+07	2.70023e+08	245728083
High	Master Protein	Q9CY58	Plasminogen activator inhibitor 1 RNA-binding protein OS=Mus musculus OX=10090 GN=Serbp1 PE=1 SV=2	43	15	53	15	44.7	Serbp1	1.1255e+06	435467	592352	145510	1.25984e+06	2.3896e+06	6.67079e+07	2.35316e+07
High	Master Protein	P68040	Receptor of activated protein C kinase 1 OS=Mus musculus OX=10090 GN=Rack1 PE=1 SV=3	65	16	53	16	35.1	Gnb2l1; Rack1	1.74309e+06	5.52726e+06	292872	241001	2.8787e+06	3.28731e+06	2.40605e+07	2.03107e+07
High	Master Protein	A0A1L1SQ51	Talin-2 OS=Mus musculus OX=10090 GN=Tln2 PE=1 SV=1	15	29	53	16	271.8	Tln2	369837	182953	183920	86143.4	666457	1.30131e+06	1.62939e+07	9.87e+06
High	Master Protein	P82198	Transforming growth factor-beta-induced protein ig-h3 OS=Mus musculus OX=10090 GN=Tgfbi PE=1 SV=1	38	18	53	18	74.6	Tgfbi	2.04063e+07	114078	3.5916e+06	95650.7	324507	841604	3.4804e+07	1.73031e+07
High	Master Protein	P60867	40S ribosomal protein S20 OS=Mus musculus OX=10090 GN=Rps20 PE=1 SV=1	33	6	52	6	13.4	Rps20	6.94915e+06	2.30344e+06	1.73677e+06	956300	7.62776e+06	8.76133e+06	1.4035e+07	1.36963e+07
High	Master Protein	O54734	Dolichyl-diphosphooligosaccharide--protein glycosyltransferase 48 kDa subunit OS=Mus musculus OX=10090 GN=Ddost PE=1 SV=2	52	14	52	14	49	Ddost	1.55264e+06	639572	669952	151186	912264	2.8326e+06	2.89742e+07	1.76638e+07
High	Master Protein	Q8CI11	Guanine nucleotide-binding protein-like 3 OS=Mus musculus OX=10090 GN=Gnl3 PE=1 SV=2	39	16	52	16	60.7	Gnl3	3.6926e+06	826330	1.14824e+06	222704	2.21854e+06	2.55102e+06	3.35698e+06	2.38577e+06
High	Master Protein	P01633	Ig kappa chain V19-17 OS=Mus musculus OX=10090 GN=Igk-V19-17 PE=1 SV=1	35	5	52	1	16.4	Igkv6-17	2.65695e+07	7.74836e+06	3.8637e+06	2.65633e+06	1.92779e+07	2.71186e+07	3.97616e+06	8.04781e+06
High	Master Protein	P21619	Lamin-B2 OS=Mus musculus OX=10090 GN=Lmnb2 PE=1 SV=2	39	23	52	15	67.3	Lmnb2	82780	25160.4	103797	5066.94	39092.9	275476	1.87802e+07	6.26398e+06
High	Master Protein	P29758	Ornithine aminotransferase, mitochondrial OS=Mus musculus OX=10090 GN=Oat PE=1 SV=1	54	17	52	17	48.3	Oat	177651	205982	116134	16917.9	541469	1.04617e+06	2.43965e+07	1.81315e+07
High	Master Protein	Q8C1B7	Septin-11 OS=Mus musculus OX=10090 GN=Septin11 PE=1 SV=4	39	16	52	9	49.7	Sept11	1.96166e+06	1.36541e+06	1.38512e+06	138450	2.89635e+06	4.39015e+06	6.89454e+07	2.13992e+07
High	Master Protein	Q8R310	Transmembrane and coiled-coil domain protein 3 OS=Mus musculus OX=10090 GN=Tmcc3 PE=1 SV=2	40	17	52	17	53.7	Tmcc3	2.78534e+06	2.09985e+06	2.88713e+06	275667	4.7416e+06	4.78122e+06	1.82325e+06	1.11004e+06
High	Master Protein	P17751	Triosephosphate isomerase OS=Mus musculus OX=10090 GN=Tpi1 PE=1 SV=5	63	14	52	14	26.7	Tpi1	1.45871e+06	489500	126289	34532.6	3.46432e+06	2.73897e+06	3.27325e+07	3.19848e+07
High	Master Protein	Q6PCW7	Amelogenin, X isoform OS=Mus musculus OX=10090 GN=Amelx PE=2 SV=1	17	6	51	5	24.7	Amelx	1.03891e+06	905949	880782	254983	2.62733e+06	1.76535e+07	3.98983e+08	1.24499e+08
High	Master Protein	Q9QYJ0	DnaJ homolog subfamily A member 2 OS=Mus musculus OX=10090 GN=Dnaja2 PE=1 SV=1	49	16	51	16	45.7	Dnaja2	2.29668e+06	1.53957e+06	1.0976e+06	595156	3.25483e+06	3.18706e+06	871153	1.08358e+06
High	Master Protein	P62962	Profilin-1 OS=Mus musculus OX=10090 GN=Pfn1 PE=1 SV=2	74	10	51	10	14.9	Pfn1	613389	321505	235900	57685.1	1.30308e+06	1.97918e+06	1.99249e+07	1.2334e+07
High	Master Protein	Q61753	D-3-phosphoglycerate dehydrogenase OS=Mus musculus OX=10090 GN=Phgdh PE=1 SV=3	23	11	50	11	56.5	Phgdh	2.42761e+06	1.48689e+06	1.82488e+06	111625	3.11237e+06	2.74614e+06	1.75141e+07	3.61063e+06
High	Master Protein	Q91X72	Hemopexin OS=Mus musculus OX=10090 GN=Hpx PE=1 SV=2	34	15	50	15	51.3	Hpx	151043	535830	109354	76002.3	179005	856004	4.93462e+07	1.60831e+07
High	Master Protein	P49312	Heterogeneous nuclear ribonucleoprotein A1 OS=Mus musculus OX=10090 GN=Hnrnpa1 PE=1 SV=2	45	13	50	11	34.2	Hnrnpa1	1.67907e+06	336901	626227	12055.6	1.75125e+06	2.24336e+06	4.53521e+07	4.70498e+07
High	Master Protein	P18528	Ig heavy chain V region 6.96 OS=Mus musculus OX=10090 PE=4 SV=1	42	3	50	2	11	Gm16971; Ighv5-4	612702	241191	364922	109446	214888	1.71338e+06	849833	504843
High	Master Protein	A0A075B5N7	Immunoglobulin kappa variable 6-13 OS=Mus musculus OX=10090 GN=Igkv6-13 PE=1 SV=7	55	5	50	2	10.4		401713	201531	81042.3	332034	677760	2.64376e+06	482107	284684
High	Master Protein	P50396	Rab GDP dissociation inhibitor alpha OS=Mus musculus OX=10090 GN=Gdi1 PE=1 SV=3	55	18	50	13	50.5	Gdi1	85706.4	230286	153055	19714.4	129130	269542	1.59667e+07	7.13168e+06
High	Master Protein	P56959	RNA-binding protein FUS OS=Mus musculus OX=10090 GN=Fus PE=1 SV=1	21	11	50	9	52.6	Fus	909380	296034	473634	447910	378382	2.17249e+06	5.16646e+07	1.97282e+07
High	Master Protein	Q99LF4	RNA-splicing ligase RtcB homolog OS=Mus musculus OX=10090 GN=Rtcb PE=1 SV=1	47	18	50	18	55.2	D10Wsu52e; Rtcb	728493	364045	414638	164082	749258	1.49837e+06	4.06796e+07	1.46012e+07
High	Master Protein	P68510	14-3-3 protein eta OS=Mus musculus OX=10090 GN=Ywhah PE=1 SV=2	49	13	49	7	28.2	Ywhah	340492	231520	74601		552000	827522	1.06805e+07	7.36724e+06
High	Master Protein	Q91VR5	ATP-dependent RNA helicase DDX1 OS=Mus musculus OX=10090 GN=Ddx1 PE=1 SV=1	32	21	49	21	82.4	Ddx1	617274	517400	506211	452154	768891	1.80796e+06	3.51683e+07	1.46455e+07
High	Master Protein	P35564	Calnexin OS=Mus musculus OX=10090 GN=Canx PE=1 SV=1	20	10	49	10	67.2	Canx	1.33771e+06	788234	584158	565339	1.82093e+06	3.05376e+06	3.91948e+06	409451
High	Master Protein	P14211	Calreticulin OS=Mus musculus OX=10090 GN=Calr PE=1 SV=1	54	21	49	21	48	Calr	6.47675e+06	3.94849e+06	2.42061e+06	3.09048e+06	1.04224e+07	1.3341e+07	5.59406e+07	1.36103e+07
High	Master Protein	P01029	Complement C4-B OS=Mus musculus OX=10090 GN=C4b PE=1 SV=3	11	11	49	11	192.8	C4b	1.07267e+06	719238	889157	106967	676493	1.36681e+06	3.13588e+06	1.17985e+06
High	Master Protein	Q64449	C-type mannose receptor 2 OS=Mus musculus OX=10090 GN=Mrc2 PE=1 SV=3	15	20	49	20	167	Mrc2	373053	263071	211925	1.38056e+06	676739	1.56838e+06	5.31006e+07	3.01146e+07
High	Master Protein	P01631	Ig kappa chain V-II region 26-10 OS=Mus musculus OX=10090 PE=1 SV=1	42	5	49	5	12.3	Igkv1-117	6.17709e+06	4.82935e+06	2.0189e+06	1.61109e+06	9.64202e+06	7.44856e+06	893737	2.37756e+06
High	Master Protein	F6RPJ9	Insulin-degrading enzyme (Fragment) OS=Mus musculus OX=10090 GN=Ide PE=1 SV=1	28	23	49	23	114.2		1.03242e+07	339385	1.11063e+06	99587.5	371104	5.54261e+06	2.64282e+07	1.11214e+07
High	Master Protein	A0A0R4J2B2	BTB/POZ domain-containing protein KCTD12 OS=Mus musculus OX=10090 GN=Kctd12 PE=1 SV=1	57	17	48	17	35.9	Kctd12	118547	144372	126023	37211.4	220958	1.32954e+06	3.05013e+07	3.30911e+07
High	Master Protein	Q9CZN7	Serine hydroxymethyltransferase, mitochondrial OS=Mus musculus OX=10090 GN=Shmt2 PE=1 SV=1	44	16	48	16	55.7	Shmt2	2.7951e+06	2.131e+06	1.93721e+06	55870.1	3.479e+06	3.74225e+06	2.0129e+07	1.62241e+07
High	Master Protein	E9PXX7	Thioredoxin domain-containing protein 5 OS=Mus musculus OX=10090 GN=Txndc5 PE=1 SV=1	59	14	48	14	38.5	Txndc5	318687	179085	136244	42193.5	363258	1.27211e+06	4.33989e+07	2.54434e+07
High	Master Protein	Q8K2J0	1-phosphatidylinositol 4,5-bisphosphate phosphodiesterase delta-3 OS=Mus musculus OX=10090 GN=Plcd3 PE=1 SV=2	21	13	47	13	88.6	Plcd3	1.94275e+06	888389	1.79761e+06	214074	1.76539e+06	2.08804e+06	456668	713339
High	Master Protein	Q8BWT1	3-ketoacyl-CoA thiolase, mitochondrial OS=Mus musculus OX=10090 GN=Acaa2 PE=1 SV=3	59	19	47	19	41.8	Acaa2	398341	670728	321979	104229	635315	1.56462e+06	2.89927e+07	3.678e+07
High	Master Protein	Q9JJI8	60S ribosomal protein L38 OS=Mus musculus OX=10090 GN=Rpl38 PE=1 SV=3	53	5	47	5	8.2	Rpl38; Rpl38-ps1; Rpl38-ps2	935418	325944	293500	271091	1.17057e+06	1.94084e+06	1.91328e+06	1.23892e+06
High	Master Protein	P05202	Aspartate aminotransferase, mitochondrial OS=Mus musculus OX=10090 GN=Got2 PE=1 SV=1	36	15	47	15	47.4	Got2	1.13422e+06	942919	204580	25076.7	2.38208e+06	3.8273e+06	3.61432e+07	5.3376e+07
High	Master Protein	A0A0A6YY47	Neural cell adhesion molecule 1 OS=Mus musculus OX=10090 GN=Ncam1 PE=1 SV=1	31	19	47	1	93.4	Ncam1		54290.8	10807.4			69451.5	3.19489e+06	1.43046e+06
High	Master Protein	Q9R112	Sulfide:quinone oxidoreductase, mitochondrial OS=Mus musculus OX=10090 GN=Sqor PE=1 SV=3	33	11	47	11	50.3	Sqrdl; Sqor	1.2874e+06	1.18817e+06	246547	871573	2.26125e+06	2.27035e+06	1.34122e+06	1.30655e+06
High	Master Protein	O88342	WD repeat-containing protein 1 OS=Mus musculus OX=10090 GN=Wdr1 PE=1 SV=3	40	17	47	17	66.4	Wdr1	784372	770836	537573	155059	1.26674e+06	2.90191e+06	6.28077e+07	2.22688e+07
High	Master Protein	Q9DCD0	6-phosphogluconate dehydrogenase, decarboxylating OS=Mus musculus OX=10090 GN=Pgd PE=1 SV=3	34	16	46	16	53.2	Pgd	665564	713678	467921		1.31367e+06	1.5319e+06	2.94343e+07	1.45066e+07
High	Master Protein	Q9QXX4	Calcium-binding mitochondrial carrier protein Aralar2 OS=Mus musculus OX=10090 GN=Slc25a13 PE=1 SV=1	24	12	46	8	74.4	Slc25a13	379308	469863	615516		481658	746626	2.1123e+06	1.30454e+06
High	Master Protein	P23953	Carboxylesterase 1C OS=Mus musculus OX=10090 GN=Ces1c PE=1 SV=4	39	17	46	17	61	Ces1c	82578.9	43947.8	101238	15842.7	158673	840254	6.37871e+07	3.70293e+07
High	Master Protein	E9Q557	Desmoplakin OS=Mus musculus OX=10090 GN=Dsp PE=1 SV=1	12	32	46	32	332.7	Dsp	6.31859e+06	335915	773151		934296	5.9569e+06	5.0365e+06	4.1846e+06
High	Master Protein	P43276	Histone H1.5 OS=Mus musculus OX=10090 GN=H1-5 PE=1 SV=2	28	8	46	7	22.6	Hist1h1b	1.49927e+06	765746	1.06344e+06	475918	1.99205e+06	2.90548e+06	2.25865e+07	1.02258e+07
High	Master Protein	P01673	Ig kappa chain V-III region PC 2485/PC 4039 OS=Mus musculus OX=10090 PE=1 SV=1	50	3	46	1	12		118097	84115	18957.7		194489	452271
High	Master Protein	A0A0B4J1I9	Immunoglobulin kappa variable 4-55 (Fragment) OS=Mus musculus OX=10090 GN=Igkv4-55 PE=1 SV=1	27	2	46	1	12.7	Igkv4-55	851153	388218	162705	473185	585050	1.10822e+06	13955.6	11379.1
High	Master Protein	P09055	Integrin beta-1 OS=Mus musculus OX=10090 GN=Itgb1 PE=1 SV=1	16	13	46	13	88.2	Itgb1	252272	187898	224265		619844	1.40721e+06	4.12985e+07	2.33608e+07
High	Master Protein	P24527	Leukotriene A-4 hydrolase OS=Mus musculus OX=10090 GN=Lta4h PE=1 SV=4	42	21	46	21	69	Lta4h	838124	656370	788931	561667	1.12141e+06	1.86731e+06	4.07418e+07	1.38309e+07
High	Master Protein	Q5SX75	Procollagen-proline 4-dioxygenase OS=Mus musculus OX=10090 GN=P4ha2 PE=1 SV=1	34	15	46	15	61	P4ha2	766171	339264	521974	32510	1.02246e+06	1.21313e+06	3.05616e+07	1.54628e+07
High	Master Protein	P46471	26S proteasome regulatory subunit 7 OS=Mus musculus OX=10090 GN=Psmc2 PE=1 SV=5	54	21	45	21	48.6	Psmc2	502721	349616	307496	19479.5	906064	1.13949e+06	2.06809e+07	7.03612e+06
High	Master Protein	P62196	26S proteasome regulatory subunit 8 OS=Mus musculus OX=10090 GN=Psmc5 PE=1 SV=1	60	20	45	18	45.6	Psmc5	1.30099e+06	918151	316251	27185.1	1.97305e+06	3.73858e+06	5.10167e+07	1.72937e+07
High	Master Protein	P62855	40S ribosomal protein S26 OS=Mus musculus OX=10090 GN=Rps26 PE=1 SV=3	50	5	45	5	13	Rps26; Rps26-ps1	6.10286e+06	3.44364e+06	1.84144e+06	3.91431e+06	7.74749e+06	8.51304e+06	3.31172e+06	2.09001e+06
High	Master Protein	P18760	Cofilin-1 OS=Mus musculus OX=10090 GN=Cfl1 PE=1 SV=3	69	10	45	8	18.5	Cfl1	1.16994e+06	759388	242669	251735	2.93303e+06	3.08791e+06	4.32812e+07	2.82764e+07
High	Master Protein	Q9D2G2	Dihydrolipoyllysine-residue succinyltransferase component of 2-oxoglutarate dehydrogenase complex, mitochondrial OS=Mus musculus OX=10090 GN=Dlst PE=1 SV=1	27	11	45	11	49	Dlst	1.30172e+06	527279	655953	12681.4	1.36305e+06	2.3688e+06	3.03253e+07	2.62079e+07
High	Master Protein	A0A140T8N5	Immunoglobulin kappa variable 6-23 (Fragment) OS=Mus musculus OX=10090 GN=Igkv6-23 PE=4 SV=2	39	4	45	1	12.8	Igkv6-23	380169	105888	9703.4	275721	178580	709048	159336	64438.4
High	Master Protein	O88844	Isocitrate dehydrogenase [NADP] cytoplasmic OS=Mus musculus OX=10090 GN=Idh1 PE=1 SV=2	53	20	45	19	46.6	Idh1	271035	178436	78837.2	1.0809e+06	580770	1.23553e+06	3.05007e+07	7.48881e+06
High	Master Protein	E9QB01	Neural cell adhesion molecule 1 OS=Mus musculus OX=10090 GN=Ncam1 PE=1 SV=2	31	19	45	1	93.6	Ncam1	191531	282430	85694.6	22962.2	116536	948200	4.51008e+07	2.12241e+07
High	Master Protein	P35700	Peroxiredoxin-1 OS=Mus musculus OX=10090 GN=Prdx1 PE=1 SV=1	61	14	45	12	22.2	Prdx1	3.06411e+06	1.93933e+06	1.00089e+06	207290	5.18184e+06	6.17635e+06	4.38511e+07	2.89194e+07
High	Master Protein	Q61233	Plastin-2 OS=Mus musculus OX=10090 GN=Lcp1 PE=1 SV=4	39	21	45	15	70.1	Lcp1	136654	121884	135015	47281.6	154272	200755	1.13491e+07	3.05398e+06
High	Master Protein	A0A0R4J0Z1	Protein disulfide-isomerase A4 OS=Mus musculus OX=10090 GN=Pdia4 PE=1 SV=1	38	21	45	21	72.3	Pdia4	1.49436e+06	722989	987438	79170	1.92537e+06	3.0986e+06	3.49877e+07	2.5857e+06
High	Master Protein	O70456	14-3-3 protein sigma OS=Mus musculus OX=10090 GN=Sfn PE=1 SV=2	38	9	44	4	27.7	Sfn	11052	43361.8	56806.9			289612	6.67302e+06	2.21076e+06
High	Master Protein	O88685	26S proteasome regulatory subunit 6A OS=Mus musculus OX=10090 GN=Psmc3 PE=1 SV=2	49	18	44	5	49.5	Psmc3	233958	435413	205319	1.56452e+06	693889	1.19224e+06	2.24812e+07	9.94801e+06
High	Master Protein	Q922D8	C-1-tetrahydrofolate synthase, cytoplasmic OS=Mus musculus OX=10090 GN=Mthfd1 PE=1 SV=4	25	21	44	21	101.1	Mthfd1	1.51602e+06	1.19245e+06	1.0205e+06	230065	1.95456e+06	2.74176e+06	2.97415e+07	1.03771e+07
High	Master Protein	P30275	Creatine kinase U-type, mitochondrial OS=Mus musculus OX=10090 GN=Ckmt1 PE=1 SV=1	46	16	44	15	47	Ckmt1	128013	58920.9	278234	38754.8	199649	1.03612e+06	4.63064e+07	2.18604e+07
High	Master Protein	Q91VC3	Eukaryotic initiation factor 4A-III OS=Mus musculus OX=10090 GN=Eif4a3 PE=1 SV=3	40	14	44	10	46.8	Eif4a3	483671	193542	282563	222084	507090	687140	1.26332e+07	5.80104e+06
High	Master Protein	Q9CZD3	Glycine--tRNA ligase OS=Mus musculus OX=10090 GN=Gars1 PE=1 SV=1	26	16	44	16	81.8	Gars	358910	279217	258839	83203.4	575755	1.57792e+06	3.09205e+07	1.32116e+07
High	Master Protein	A0A0G2JE99	Immunoglobulin lambda constant 1 (Fragment) OS=Mus musculus OX=10090 GN=Iglc1 PE=4 SV=1	80	5	44	5	11.7		2.26951e+06	1.21352e+06	355184	511175	3.07681e+06	3.75637e+06	659141	488986
High	Master Protein	O70475	UDP-glucose 6-dehydrogenase OS=Mus musculus OX=10090 GN=Ugdh PE=1 SV=1	40	14	44	14	54.8	Ugdh	1.49572e+06	1.39934e+06	1.41009e+06		2.28552e+06	2.73451e+06	1.51651e+07	5.95129e+06
High	Master Protein	Q6P5E4	UDP-glucose:glycoprotein glucosyltransferase 1 OS=Mus musculus OX=10090 GN=Uggt1 PE=1 SV=4	23	27	44	27	176.3	Uggt1	522821	371325	520621	341328	558875	1.14315e+06	3.19349e+07	1.23702e+07
High	Master Protein	P62192	26S proteasome regulatory subunit 4 OS=Mus musculus OX=10090 GN=Psmc1 PE=1 SV=1	49	18	43	16	49.2	Psmc1	2.71494e+06	1.22443e+06	1.21241e+06	1.66289e+06	4.84564e+06	4.83929e+06	2.83421e+07	9.27989e+06
High	Master Protein	P54775	26S proteasome regulatory subunit 6B OS=Mus musculus OX=10090 GN=Psmc4 PE=1 SV=2	63	19	43	18	47.4	Psmc4	918291	443532	490913	66838.2	1.19072e+06	1.50977e+06	2.03033e+07	5.90863e+06
High	Master Protein	Q8BP67	60S ribosomal protein L24 OS=Mus musculus OX=10090 GN=Rpl24 PE=1 SV=2	32	6	43	6	17.8	Rpl24	3.58749e+06	828008	644205	943155	4.32597e+06	4.50985e+06	1.56765e+06	901783
High	Master Protein	H3BKM0	AP complex subunit beta OS=Mus musculus OX=10090 GN=Ap2b1 PE=1 SV=1	31	22	43	16	101.3		895018	586497	551504	157032	716846	1.43784e+06	3.44721e+07	5.72661e+06
High	Master Protein	Q8BG05	Heterogeneous nuclear ribonucleoprotein A3 OS=Mus musculus OX=10090 GN=Hnrnpa3 PE=1 SV=1	45	17	43	16	39.6	Hnrnpa3	513852	329483	146034	310661	1.11352e+06	2.06586e+06	4.93269e+07	4.94238e+07
High	Master Protein	F8VQJ3	Laminin subunit gamma-1 OS=Mus musculus OX=10090 GN=Lamc1 PE=1 SV=1	16	20	43	20	177.1	Lamc1	188027	188265	265576	220061	333267	236066	1.9674e+07	1.29803e+07
High	Master Protein	P24369	Peptidyl-prolyl cis-trans isomerase B OS=Mus musculus OX=10090 GN=Ppib PE=1 SV=2	51	12	43	12	23.7	Ppib	360812	307517	274048	40971.1	582321	2.68499e+06	3.48534e+07	2.42725e+07
High	Master Protein	Q61171	Peroxiredoxin-2 OS=Mus musculus OX=10090 GN=Prdx2 PE=1 SV=3	41	9	43	9	21.8	Prdx2	647623	507542	134978	69969.2	1.15091e+06	2.43814e+06	4.15327e+07	3.55641e+07
High	Master Protein	P14148	60S ribosomal protein L7 OS=Mus musculus OX=10090 GN=Rpl7 PE=1 SV=2	42	13	42	13	31.4	Rpl7	2.30703e+06	784760	467642	122204	3.5736e+06	3.13147e+06	9.30588e+06	7.86156e+06
High	Master Protein	P61205	ADP-ribosylation factor 3 OS=Mus musculus OX=10090 GN=Arf3 PE=2 SV=2	64	9	42	6	20.6	Arf3	987137	446744	227663	71442.7	921221	2.44764e+06	1.92167e+07	1.55561e+07
High	Master Protein	O35887	Calumenin OS=Mus musculus OX=10090 GN=Calu PE=1 SV=1	46	13	42	2	37	Calu	676463	525765	169749	5018.3	1.16198e+06	2.61792e+06	6.27261e+07	3.19211e+07
High	Master Protein	P24788	Cyclin-dependent kinase 11B OS=Mus musculus OX=10090 GN=Cdk11b PE=1 SV=2	23	17	42	17	91.5	Cdk11b	7.72174e+06	1.67983e+06	3.11575e+06	401721	3.74742e+06	2.68183e+06	4.93717e+06	1.98063e+06
High	Master Protein	Q61699	Heat shock protein 105 kDa OS=Mus musculus OX=10090 GN=Hsph1 PE=1 SV=2	19	15	42	13	96.3	Hsph1	3.21681e+06	1.72683e+06	967263	97216.4	7.15414e+06	3.83691e+06	6.87117e+06	2.02929e+06
High	Master Protein	Q99PT1	Rho GDP-dissociation inhibitor 1 OS=Mus musculus OX=10090 GN=Arhgdia PE=1 SV=3	69	11	42	11	23.4	Arhgdia	2.39105e+06	215177	237937	71192.3	950348	3.00745e+06	4.19504e+07	2.58682e+07
High	Master Protein	P28271	Cytoplasmic aconitate hydratase OS=Mus musculus OX=10090 GN=Aco1 PE=1 SV=3	30	18	41	18	98.1	Aco1	122636	193095	143755	213029	261871	454906	1.66788e+07	6.04742e+06
High	Master Protein	P50608	Fibromodulin OS=Mus musculus OX=10090 GN=Fmod PE=2 SV=1	28	9	41	9	43	Fmod	348261	50075	192236	67350.9	386886	1.02315e+06	4.78977e+07	4.7045e+07
High	Master Protein	O08795	Glucosidase 2 subunit beta OS=Mus musculus OX=10090 GN=Prkcsh PE=1 SV=1	22	14	41	14	58.8	Prkcsh	772538	477366	850386	116443	1.14057e+06	1.92783e+06	6.28979e+07	3.16583e+07
High	Master Protein	A0A140T8M2	Immunoglobulin kappa variable 12-44 (Fragment) OS=Mus musculus OX=10090 GN=Igkv12-44 PE=4 SV=2	41	4	41	3	12.5	Igkv12-44	6.48195e+06	4.37771e+06	1.948e+06	1.86121e+06	8.41247e+06	7.47953e+06	366569	984237
High	Master Protein	A0A140T8P1	Immunoglobulin kappa variable 6-14 (Fragment) OS=Mus musculus OX=10090 GN=Igkv6-14 PE=4 SV=2	34	4	41	2	12.8	Igkv6-14	765173	262908	155659	100520	952234	828297	1.14536e+06	1.379e+06
High	Master Protein	A0A6I8MX27	L-lactate dehydrogenase OS=Mus musculus OX=10090 GN=Ldhb PE=1 SV=1	38	12	41	11	37.3		294752	250608	167897	41952.7	690048	2.02111e+06	3.54946e+07	2.93201e+07
High	Master Protein	G5E829	Plasma membrane calcium-transporting ATPase 1 OS=Mus musculus OX=10090 GN=Atp2b1 PE=1 SV=1	13	12	41	6	134.7	Atp2b1	757203	657846	818988	24062.6	1.02526e+06	1.50928e+06	1.11017e+07	5.63282e+06
High	Master Protein	Q8BW10	RNA-binding protein NOB1 OS=Mus musculus OX=10090 GN=Nob1 PE=1 SV=1	33	12	41	12	45.4	Nob1	3.37245e+06	2.24849e+06	1.88586e+06	277188	2.86321e+06	3.95956e+06	861174	614675
High	Master Protein	E9Q1G8	Septin-7 OS=Mus musculus OX=10090 GN=Septin7 PE=1 SV=2	37	15	41	14	50.6	Sept7	769061	528320	428383	78424.6	754054	1.77573e+06	4.22642e+07	11197081
High	Master Protein	Q8BG32	26S proteasome non-ATPase regulatory subunit 11 OS=Mus musculus OX=10090 GN=Psmd11 PE=1 SV=3	39	15	40	15	47.4	Psmd11	696330	300572	323942	45521.3	602742	1.37659e+06	2.20094e+07	7.78306e+06
High	Master Protein	Q91XV3	Brain acid soluble protein 1 OS=Mus musculus OX=10090 GN=Basp1 PE=1 SV=3	85	11	40	11	22.1	Basp1	302856	291432	121577		472902	1.1868e+06	2.76203e+07	1.40964e+07
High	Master Protein	A0A075B5N9	Immunoglobulin kappa variable 3-7 OS=Mus musculus OX=10090 GN=Igkv3-7 PE=4 SV=7	56	3	40	2	10.8		3.24504e+06	2.06131e+06	705507		3.49896e+06	3.02259e+06	1.70912e+06	209773
High	Master Protein	B1AR69	Myosin, heavy polypeptide 13, skeletal muscle OS=Mus musculus OX=10090 GN=Myh13 PE=1 SV=1	15	26	40	2	223.4	Myh13	10663.4						115289	6.56067e+06
High	Master Protein	P15532	Nucleoside diphosphate kinase A OS=Mus musculus OX=10090 GN=Nme1 PE=1 SV=1	67	10	40	3	17.2	Nme1	127726	114864	37461.4		235915	796201	1.09676e+07	1.23938e+07
High	Master Protein	Q9Z247	Peptidyl-prolyl cis-trans isomerase FKBP9 OS=Mus musculus OX=10090 GN=Fkbp9 PE=1 SV=1	30	16	40	15	63	Fkbp9	221238	135085	545574	105548	423003	968730	5.81324e+07	3.33365e+07
High	Master Protein	Q9CY21	Probable 18S rRNA (guanine-N(7))-methyltransferase OS=Mus musculus OX=10090 GN=Bud23 PE=1 SV=1	34	6	40	6	31.6	Wbscr22; Bud23	2.14194e+06	978376	213856	564238	2.25096e+06	2.74526e+06	14928
High	Master Protein	Q8R1F1	Protein Niban 2 OS=Mus musculus OX=10090 GN=Niban2 PE=1 SV=2	34	17	40	17	84.8	Fam129b	312505	183492	237356	93022.2	376965	689919	2.15227e+07	6.63733e+06
High	Master Protein	F6T4M4	Serine/arginine repetitive matrix protein 1 (Fragment) OS=Mus musculus OX=10090 GN=Srrm1 PE=1 SV=1	6	1	40	1	16.2		8.30472e+07	1.01005e+08	1.31049e+08	9780895	9.8819e+07	1.17851e+08	2.35935e+08	2.09544e+08
High	Master Protein	Q8BTI8	Serine/arginine repetitive matrix protein 2 OS=Mus musculus OX=10090 GN=Srrm2 PE=1 SV=3	8	15	40	15	294.7	Srrm2	2.47421e+06	1.39573e+06	2.54655e+06	46435.2	1.88612e+06	1.70872e+06	1.54147e+06	686319
High	Master Protein	Q8C483	Seryl-tRNA synthetase OS=Mus musculus OX=10090 GN=Sars PE=1 SV=1	39	17	40	17	61.1	Sars	288508	245204	286116	126514	743678	926333	1.76787e+07	5.5459e+06
High	Master Protein	Q9Z1N5	Spliceosome RNA helicase Ddx39b OS=Mus musculus OX=10090 GN=Ddx39b PE=1 SV=1	42	15	40	8	49	Ddx39b	451729	350748	323030	543478	774670	1.12114e+06	2.83584e+07	4.95701e+06
High	Master Protein	Q3TTL0	Uncharacterized protein C3orf38 homolog OS=Mus musculus OX=10090 PE=2 SV=1	70	15	40	15	39.5	4930453N24Rik	978660	64906.2	44978.9	962329	7.52562e+06	6.72261e+06	2.6016e+06	756560
High	Master Protein	Q6ZWU9	40S ribosomal protein S27 OS=Mus musculus OX=10090 GN=Rps27 PE=1 SV=3	40	5	39	3	9.5	Rps27; Gm9846; Rps27rt	2.96975e+06	770265	390887	1.13531e+06	4.02092e+06	5.82819e+06	2.89051e+06	4.99889e+06
High	Master Protein	Q07076	Annexin A7 OS=Mus musculus OX=10090 GN=Anxa7 PE=1 SV=2	30	13	39	13	49.9	Anxa7	648434	321285	323576	6631.47	836037	1.16699e+06	2.22736e+07	1.2188e+07
High	Master Protein	P32261	Antithrombin-III OS=Mus musculus OX=10090 GN=Serpinc1 PE=1 SV=1	42	16	39	16	52	Serpinc1	266437	149382	253796	221354	316598	563020	2.6957e+07	9.84428e+06
High	Master Protein	Q6XLQ8	Calumenin OS=Mus musculus OX=10090 GN=Calu PE=1 SV=1	45	12	39	1	37.1	Calu							147334	87716.6
High	Master Protein	P63037	DnaJ homolog subfamily A member 1 OS=Mus musculus OX=10090 GN=Dnaja1 PE=1 SV=1	41	12	39	12	44.8	Dnaja1	3.00874e+06	957287	1.48954e+06	337018	2.67738e+06	3.74627e+06	5.58768e+06	1.63617e+06
High	Master Protein	Q99KV1	DnaJ homolog subfamily B member 11 OS=Mus musculus OX=10090 GN=Dnajb11 PE=1 SV=1	26	9	39	9	40.5	Dnajb11	2.93182e+06	633812	1.59932e+06	564834	2.35133e+06	2.93017e+06	8.74787e+06	6.69741e+06
High	Master Protein	P18527	Ig heavy chain V region 914 OS=Mus musculus OX=10090 PE=1 SV=1	39	3	39	2	10.7	Gm16949	1.292e+06	42860.2	1.29796e+06	381105	883938	2.34966e+06	65194.2	32565.4
High	Master Protein	A0A075B5Q4	Immunoglobulin heavy variable 5-12 (Fragment) OS=Mus musculus OX=10090 GN=Ighv5-12 PE=4 SV=1	31	3	39	1	13.1	LOC674114	1.71063e+06	1.1873e+06	1.59111e+06	509869	3.39269e+06	2.14807e+06	348662
High	Master Protein	P13541	Myosin-3 OS=Mus musculus OX=10090 GN=Myh3 PE=2 SV=2	14	25	39	1	223.7	Myh3		24393.1	20508.6			16214.1		97547.2
High	Master Protein	P50247	Adenosylhomocysteinase OS=Mus musculus OX=10090 GN=Ahcy PE=1 SV=3	37	14	38	14	47.7	Ahcy; Gm4737	1.29696e+06	758048	220143	287545	2.20156e+06	2.63873e+06	3.55703e+07	1.34269e+07
High	Master Protein	P61750	ADP-ribosylation factor 4 OS=Mus musculus OX=10090 GN=Arf4 PE=1 SV=2	54	7	38	3	20.4	Arf4	1.1819e+06	764724	541553	68413.8	1.27529e+06	2.17363e+06	1.58671e+07	1.00934e+07
High	Master Protein	Q9D0I9	Arginine--tRNA ligase, cytoplasmic OS=Mus musculus OX=10090 GN=Rars1 PE=1 SV=2	27	16	38	16	75.6	Rars	917820	681484	668183	65636.8	1.48798e+06	1.89964e+06	1.28849e+07	4.21965e+06
High	Master Protein	E9QAI5	Aspartate carbamoyltransferase OS=Mus musculus OX=10090 GN=Cad PE=1 SV=1	12	21	38	20	236.1		1.10535e+06	1.33809e+06	1.73479e+06	103557	1.87609e+06	2.38418e+06	9196067	8.66569e+06
High	Master Protein	E9QN70	Laminin subunit beta-1 OS=Mus musculus OX=10090 GN=Lamb1 PE=1 SV=1	13	21	38	21	202.3	Lamb1	477724	352063	446344	8000.09	501974	849438	2.16275e+07	1.47299e+07
High	Master Protein	P10493	Nidogen-1 OS=Mus musculus OX=10090 GN=Nid1 PE=1 SV=2	21	19	38	18	136.5	Nid1	323065	187249	518685	52353.7	326958	1.0084e+06	2.22353e+07	1.52882e+07
High	Master Protein	P30412	Peptidyl-prolyl cis-trans isomerase C OS=Mus musculus OX=10090 GN=Ppic PE=1 SV=1	43	10	38	10	22.8	Ppic	63955	75538.7	10220	54387	133644	1.0409e+06	1.71895e+07	1.41201e+07
High	Master Protein	Q9D0F3	Protein ERGIC-53 OS=Mus musculus OX=10090 GN=Lman1 PE=1 SV=1	33	15	38	15	57.8	Lman1	595727	502267	703214	4818.41	1.04551e+06	2.30798e+06	8.63241e+07	4.61214e+07
High	Master Protein	Q60598	Src substrate cortactin OS=Mus musculus OX=10090 GN=Cttn PE=1 SV=2	31	17	38	17	61.2	Cttn	4.37945e+06	2.49366e+06	3.35476e+06	364839	5.87323e+06	8.88506e+06	1.00264e+08	3.85585e+07
High	Master Protein	P61922	4-aminobutyrate aminotransferase, mitochondrial OS=Mus musculus OX=10090 GN=Abat PE=1 SV=1	41	13	37	13	56.4	Abat	91907.4	16585.3	110693		93046.7	242971	9.64094e+06	6.56495e+06
High	Master Protein	P47963	60S ribosomal protein L13 OS=Mus musculus OX=10090 GN=Rpl13 PE=1 SV=3	29	7	37	7	24.3	Rpl13	3.95377e+06	1.43282e+06	784712	430049	4.14983e+06	4.09741e+06	5.9557e+06	3.14378e+06
High	Master Protein	Q00898	Alpha-1-antitrypsin 1-5 OS=Mus musculus OX=10090 GN=Serpina1e PE=1 SV=1	28	10	37	3	45.9	Serpina1e							1.03743e+06	161806
High	Master Protein	Q9R045	Angiopoietin-related protein 2 OS=Mus musculus OX=10090 GN=Angptl2 PE=2 SV=2	29	11	37	11	57.1	Angptl2	1.24831e+06	757097	1.13849e+06	110646	1.51623e+06	2.02885e+06	4.14632e+06	2.7502e+06
High	Master Protein	B1AU25	Apoptosis-inducing factor 1, mitochondrial OS=Mus musculus OX=10090 GN=Aifm1 PE=1 SV=1	36	15	37	15	66.1	Aifm1	1.10249e+06	755044	818287	1.2965e+06	1.48781e+06	1.61761e+06	2.45802e+07	1.42127e+07
High	Master Protein	G3X8Q5	Ceruloplasmin OS=Mus musculus OX=10090 GN=Cp PE=1 SV=1	23	17	37	17	124.1	Cp	788475	944863	701439	212150	973628	1.24091e+06	1.76371e+07	9.3632e+06
High	Master Protein	P06802	Ectonucleotide pyrophosphatase/phosphodiesterase family member 1 OS=Mus musculus OX=10090 GN=Enpp1 PE=1 SV=4	25	17	37	17	103.1	Enpp1	175846	174455	82274.2	55140	253482	279440	2.08646e+07	1.7011e+07
High	Master Protein	Q60668	Heterogeneous nuclear ribonucleoprotein D0 OS=Mus musculus OX=10090 GN=Hnrnpd PE=1 SV=2	38	16	37	2	38.3	Hnrnpd	293730	59178.5	19230.2		208150	922652	2.84104e+07	2.24017e+07
High	Master Protein	Q61739	Integrin alpha-6 OS=Mus musculus OX=10090 GN=Itga6 PE=1 SV=3	21	20	37	6	122.1	Itga6	396629	51583.7	166004	24788.9	125798	359906	1.66866e+07	1.07684e+07
High	Master Protein	A2AKI5	Integrin alpha-V OS=Mus musculus OX=10090 GN=Itgav PE=1 SV=1	24	19	37	19	111.4	Itgav	31279.9	295606	341703	20484.6	152283	854520	2.06653e+07	1.15536e+07
High	Master Protein	Q61029	Lamina-associated polypeptide 2, isoforms beta/delta/epsilon/gamma OS=Mus musculus OX=10090 GN=Tmpo PE=1 SV=4	40	12	37	5	50.3	Tmpo	1.26748e+06	622189	1.05221e+06	422724	1.14156e+06	1.72214e+06	4.41883e+06	1.55959e+06
High	Master Protein	F8WID5	Tropomyosin alpha-1 chain OS=Mus musculus OX=10090 GN=Tpm1 PE=1 SV=1	51	23	37	1	37.4		508642	204650	76386.9	86549.1	848655	1.98054e+06	3.49069e+07	5.23889e+07
High	Master Protein	P35979	60S ribosomal protein L12 OS=Mus musculus OX=10090 GN=Rpl12 PE=1 SV=2	48	6	36	6	17.8	Rpl12	829615	629333	424497	7519.74	1.47641e+06	1.77578e+06	1.19017e+07	8.73018e+06
High	Master Protein	P61164	Alpha-centractin OS=Mus musculus OX=10090 GN=Actr1a PE=1 SV=1	47	11	36	5	42.6	Actr1a		45038.6			32233.8	211130	3.54705e+06	1.84452e+06
High	Master Protein	P16045	Galectin-1 OS=Mus musculus OX=10090 GN=Lgals1 PE=1 SV=3	62	7	36	7	14.9	Lgals1	436913	95817.4	125296	115606	1.66614e+06	1.45039e+06	1.5068e+07	1.95485e+07
High	Master Protein	A0A075B5Q9	Immunoglobulin heavy variable 5-15 OS=Mus musculus OX=10090 GN=Ighv5-15 PE=4 SV=1	33	3	36	1	12.9		117735	71316.9	130233		147074	145039	1.73646e+06
High	Master Protein	A0A075B5R1	Immunoglobulin heavy variable 5-17 (Fragment) OS=Mus musculus OX=10090 GN=Ighv5-17 PE=1 SV=1	19	2	36	1	12.9		111819	103434	78822.3	211132	176934	386397	63399.9	47063.3
High	Master Protein	A0A140T8P6	Immunoglobulin kappa variable 12-46 (Fragment) OS=Mus musculus OX=10090 GN=Igkv12-46 PE=1 SV=2	41	3	36	2	12.6	Igkv12-46	418356	458669	161543	235022	352652	824919		38792.5
High	Master Protein	Q9CXY6	Interleukin enhancer-binding factor 2 OS=Mus musculus OX=10090 GN=Ilf2 PE=1 SV=1	47	12	36	12	43	Ilf2	123495	114756	19867	20833	149691	504945	1.42836e+07	8.22153e+06
High	Master Protein	Q9DCN2	NADH-cytochrome b5 reductase 3 OS=Mus musculus OX=10090 GN=Cyb5r3 PE=1 SV=3	42	10	36	10	34.1	Cyb5r3	491871	321778	36097	83007.4	1.15494e+06	2.19262e+06	2.24956e+07	1.5339e+07
High	Master Protein	Q99KP6	Pre-mRNA-processing factor 19 OS=Mus musculus OX=10090 GN=Prpf19 PE=1 SV=1	42	13	36	13	55.2	Prpf19	554811	156923	305580	6932.85	307067	1.22453e+06	2.71171e+07	9.82933e+06
High	Master Protein	Q3UW53	Protein Niban 1 OS=Mus musculus OX=10090 GN=Niban1 PE=1 SV=2	25	20	36	20	102.6	Fam129a	272726	222742	252458	58080.9	1.00024e+06	613825	1.95818e+07	4.8123e+06
High	Master Protein	Q9CWK8	Sorting nexin-2 OS=Mus musculus OX=10090 GN=Snx2 PE=1 SV=2	39	17	36	16	58.4	Snx2	504621	369274	246585	10951.4	305966	2.53438e+06	3.92713e+07	1.41105e+07
High	Master Protein	Q9D0R2	Threonine--tRNA ligase 1, cytoplasmic OS=Mus musculus OX=10090 GN=Tars1 PE=1 SV=2	24	15	36	15	83.3	Tars	783681	402306	483276	116868	872989	1.47063e+06	1.41582e+07	5.67453e+06
High	Master Protein	P58774	Tropomyosin beta chain OS=Mus musculus OX=10090 GN=Tpm2 PE=1 SV=1	58	21	36	1	32.8	Tpm2					25264.5	19127.5		2.73472e+06
High	Master Protein	Q9CQF3	Cleavage and polyadenylation specificity factor subunit 5 OS=Mus musculus OX=10090 GN=Nudt21 PE=1 SV=1	59	10	35	10	26.2	Nudt21	2.25967e+06	543967	313895	294005	2.1119e+06	2.54768e+06	1.08691e+06	1.07591e+06
High	Master Protein	Q9D1A2	Cytosolic non-specific dipeptidase OS=Mus musculus OX=10090 GN=Cndp2 PE=1 SV=1	42	14	35	14	52.7	Cndp2	251731	68316.7	121227		304461	383131	21517302	8.69489e+06
High	Master Protein	Q99LC5	Electron transfer flavoprotein subunit alpha, mitochondrial OS=Mus musculus OX=10090 GN=Etfa PE=1 SV=2	59	13	35	13	35	Etfa	139138	138989	51451.3		258773	593134	1.2683e+07	2.09844e+07
High	Master Protein	O55196	Enamelin OS=Mus musculus OX=10090 GN=Enam PE=1 SV=1	23	19	35	19	140.9	Enam	172696	26085.4	248929		742809	1.02739e+06	8.9313e+07	3.05996e+06
High	Master Protein	Q64521	Glycerol-3-phosphate dehydrogenase, mitochondrial OS=Mus musculus OX=10090 GN=Gpd2 PE=1 SV=2	35	19	35	19	80.9	Gpd2	344733	319097	286779	17966.3	444634	948239	1.57139e+07	8.74023e+06
High	Master Protein	C0HKD9	Microfibrillar-associated protein 1B OS=Mus musculus OX=10090 GN=Mfap1b PE=1 SV=1	34	11	35	11	51.9	Mfap1a; Mfap1b	2.3626e+06	1.06662e+06	2.39736e+06	301708	2.25615e+06	3.06228e+06	2.81997e+06	809532
High	Master Protein	B7ZN28	Papilin OS=Mus musculus OX=10090 GN=Papln PE=1 SV=1	26	23	35	23	141.3	Papln	88337.1	124567	121527	190699	92564.9	1.27105e+06	5.96761e+07	3.92608e+06
High	Master Protein	Q60715	Prolyl 4-hydroxylase subunit alpha-1 OS=Mus musculus OX=10090 GN=P4ha1 PE=1 SV=2	33	15	35	15	60.9	P4ha1	953823	434602	621175	75964.9	1.17276e+06	1.5124e+06	1.67306e+07	4.83351e+06
High	Master Protein	P35486	Pyruvate dehydrogenase E1 component subunit alpha, somatic form, mitochondrial OS=Mus musculus OX=10090 GN=Pdha1 PE=1 SV=1	38	15	35	15	43.2	Pdha1	241592	123098	105905		508337	443990	1.94915e+07	2.22098e+07
High	Master Protein	P62821	Ras-related protein Rab-1A OS=Mus musculus OX=10090 GN=Rab1A PE=1 SV=3	64	12	35	6	22.7	Rab1; Rab1a	2.02969e+06	388716	187126	26497.7	989933	2.23721e+06	4.1907e+07	3.03318e+07
High	Master Protein	P60122	RuvB-like 1 OS=Mus musculus OX=10090 GN=Ruvbl1 PE=1 SV=1	38	12	35	12	50.2	Ruvbl1	478940	444359	440454	39047.4	808992	923820	1.50358e+07	6.71924e+06
High	Master Protein	A2AIM4	Tropomyosin beta chain OS=Mus musculus OX=10090 GN=Tpm2 PE=1 SV=1	56	21	35	1	33	Tpm2	30004.6	8676.17	33444.3		37821.7	99809.5	1.4181e+06	9.60168e+06
High	Master Protein	A0A087WPH7	26S proteasome regulatory subunit 6A (Fragment) OS=Mus musculus OX=10090 GN=Psmc3 PE=1 SV=6	58	14	34	1	34			16754.1					247689	125487
High	Master Protein	P17426	AP-2 complex subunit alpha-1 OS=Mus musculus OX=10090 GN=Ap2a1 PE=1 SV=1	29	20	34	13	107.6	Ap2a1	73070.9	82771.8	67542.8	27890.3	384556	495185	1.0695e+07	5.00344e+06
High	Master Protein	P06728	Apolipoprotein A-IV OS=Mus musculus OX=10090 GN=Apoa4 PE=1 SV=3	63	18	34	18	45	Apoa4	1.91644e+06	185896	822358	26990.7	271403	3.40607e+06	3.38553e+07	2.5536e+07
High	Master Protein	Q3V117	ATP-citrate synthase OS=Mus musculus OX=10090 GN=Acly PE=1 SV=1	22	20	34	20	120.7	Acly	654716	974781	929444	28269.8	1.70513e+06	1.74475e+06	7.843e+06	3.0369e+06
High	Master Protein	A0A0G2JFY5	Far upstream element-binding protein 1 OS=Mus musculus OX=10090 GN=Fubp1 PE=1 SV=1	36	17	34	16	68.8	Fubp1	799318	440758	547425	9768.7	660620	1.46272e+06	3.90416e+07	1.56167e+07
High	Master Protein	Q9CQN1	Heat shock protein 75 kDa, mitochondrial OS=Mus musculus OX=10090 GN=Trap1 PE=1 SV=1	28	14	34	13	80.2	Trap1	258260	293360	363514	68080.2	592252	686231	7.77354e+06	3.82188e+06
High	Master Protein	Q64522	Histone H2A type 2-B OS=Mus musculus OX=10090 GN=H2ac21 PE=1 SV=3	58	5	34	1	14	Hist2h2ab						145612	2554615	3.28574e+06
High	Master Protein	P06801	NADP-dependent malic enzyme OS=Mus musculus OX=10090 GN=Me1 PE=1 SV=2	41	15	34	15	63.9	Me1	175481	246240	235144	198886	299763	561561	1.32173e+07	4.1564e+06
High	Master Protein	Q8CI51	PDZ and LIM domain protein 5 OS=Mus musculus OX=10090 GN=Pdlim5 PE=1 SV=4	32	13	34	8	63.3	Pdlim5	1.01639e+06	245275	595539		917750	1.70715e+06	1.12823e+07	6.41381e+06
High	Master Protein	A0A5F8MQ58	Periaxin (Fragment) OS=Mus musculus OX=10090 GN=Prx PE=1 SV=1	21	20	34	20	162.3		182903	169103	92267.7	256038	292452	628353	1.24808e+07	4.5192e+06
High	Master Protein	Q9WU78	Programmed cell death 6-interacting protein OS=Mus musculus OX=10090 GN=Pdcd6ip PE=1 SV=3	34	23	34	23	96	Pdcd6ip	456363	299794	249889	7256.37	629659	1.04854e+06	19554017	5.2455e+06
High	Master Protein	Q3U4F0	Sideroflexin-3 OS=Mus musculus OX=10090 GN=Sfxn3 PE=1 SV=1	54	10	34	8	30.9	Sfxn3	1.49526e+06	782181	186364	95416	1.16431e+06	1.16027e+06	7.13174e+06	4.78181e+06
High	Master Protein	E9Q456	Tropomyosin alpha-1 chain OS=Mus musculus OX=10090 GN=Tpm1 PE=1 SV=1	59	18	34	2	28.7		18178.4					31126.8	13437	1.85863e+06
High	Master Protein	P10852	4F2 cell-surface antigen heavy chain OS=Mus musculus OX=10090 GN=Slc3a2 PE=1 SV=1	31	14	33	14	58.3	Slc3a2	665425	781108	459213		1.10358e+06	1.50794e+06	2.82686e+07	1.47123e+07
High	Master Protein	P14115	60S ribosomal protein L27a OS=Mus musculus OX=10090 GN=Rpl27a PE=1 SV=5	31	6	33	6	16.6	Rpl27a	4.73248e+06	703765	1.02442e+06	1.9597e+06	1.8747e+06	5.30037e+06	1.76741e+07	1.66221e+07
High	Master Protein	Q02248	Catenin beta-1 OS=Mus musculus OX=10090 GN=Ctnnb1 PE=1 SV=1	27	18	33	16	85.4	Ctnnb1	209600	204951	271649		756368	514962	2.11919e+07	6.45629e+06
High	Master Protein	Q64739	Collagen alpha-2(XI) chain OS=Mus musculus OX=10090 GN=Col11a2 PE=2 SV=3	10	14	33	14	171.4	Col11a2	75927.3	52022.6	107555	29514.3	107536	1.06584e+06	2.47527e+07	3.67272e+07
High	Master Protein	G5E8G0	Heterogeneous nuclear ribonucleoprotein D0 OS=Mus musculus OX=10090 GN=Hnrnpd PE=1 SV=1	41	15	33	1	30.6	Hnrnpd							517060	133097
High	Master Protein	P14152	Malate dehydrogenase, cytoplasmic OS=Mus musculus OX=10090 GN=Mdh1 PE=1 SV=3	38	10	33	10	36.5	Mdh1	299408	128819	79148.2	87523.3	1.15599e+06	2.01714e+06	2.54057e+07	1.66521e+07
High	Master Protein	Q3UQ28	Peroxidasin homolog OS=Mus musculus OX=10090 GN=Pxdn PE=1 SV=2	12	14	33	14	165	Pxdn	6.24768e+06	3.59745e+06	2.79685e+06	157643	8.16911e+06	7.03812e+06	5.671e+06	3.91144e+06
High	Master Protein	G5E8R1	Tropomyosin alpha-1 chain OS=Mus musculus OX=10090 GN=Tpm1 PE=1 SV=1	54	18	33	0	28.5	Tpm1		9848.09			21699.8	68865.8	895000	592882
High	Master Protein	A0A1B0GQU8	60S ribosomal protein L18 OS=Mus musculus OX=10090 GN=Rpl18 PE=1 SV=1	45	7	32	7	18.1		1.59806e+06	1.22626e+06	897672	434618	2.44086e+06	2.26628e+06	6.97904e+06	4.47517e+06
High	Master Protein	P24270	Catalase OS=Mus musculus OX=10090 GN=Cat PE=1 SV=4	36	13	32	13	59.8	Cat	248759	96056.8	153978	55864.4	365909	795545	1.71213e+07	8.26267e+06
High	Master Protein	Q6P1J1	Crmp1 protein OS=Mus musculus OX=10090 GN=Crmp1 PE=1 SV=1	21	10	32	6	74.2	Crmp1	34726.1	8023.33	32805.8		140444	53443	2.54558e+06	1.61673e+06
High	Master Protein	P39054	Dynamin-2 OS=Mus musculus OX=10090 GN=Dnm2 PE=1 SV=2	29	21	32	15	98.1	Dnm2	458661	512576	471763	200271	938004	1.5387e+06	2.51361e+07	1.31029e+07
High	Master Protein	Q921G7	Electron transfer flavoprotein-ubiquinone oxidoreductase, mitochondrial OS=Mus musculus OX=10090 GN=Etfdh PE=1 SV=1	35	18	32	18	68	Etfdh	941458	1.3076e+06	1.10412e+06	27597.1	231519	1.9526e+06	2.47588e+07	1.83411e+07
High	Master Protein	P43275	Histone H1.1 OS=Mus musculus OX=10090 GN=H1-1 PE=1 SV=2	37	7	32	4	21.8	Hist1h1a	7099.37	36162.2	4191.26		108073	568395	1.13378e+07	3.90883e+06
High	Master Protein	Q61425	Hydroxyacyl-coenzyme A dehydrogenase, mitochondrial OS=Mus musculus OX=10090 GN=Hadh PE=1 SV=2	40	10	32	10	34.4	Hadh	127666	140383	78552.7	202860	111297	489337	9.78759e+06	1.24369e+07
High	Master Protein	Q9CPN8	Insulin-like growth factor 2 mRNA-binding protein 3 OS=Mus musculus OX=10090 GN=Igf2bp3 PE=1 SV=1	21	9	32	6	63.5	Igf2bp3	1.12018e+06	963173	1.10647e+06	12354.6	1.74339e+06	1.4944e+06	7.57045e+06	3.45646e+06
High	Master Protein	Q3V3R1	Monofunctional C1-tetrahydrofolate synthase, mitochondrial OS=Mus musculus OX=10090 GN=Mthfd1l PE=1 SV=2	20	16	32	16	105.7	Mthfd1l	532390	247607	256617	787540	478039	970780	8.78495e+06	4.24515e+06
High	Master Protein	Q6URW6	Myosin-14 OS=Mus musculus OX=10090 GN=Myh14 PE=1 SV=1	14	20	32	16	228.4	Myh14	421240	22000.3	381044		98135.8	754639	4.93845e+06	3.6833e+06
High	Master Protein	O35074	Prostacyclin synthase OS=Mus musculus OX=10090 GN=Ptgis PE=1 SV=1	35	14	32	14	57	Ptgis	221102	212047	199322	309568	282901	873188	1.80518e+07	1.36546e+07
High	Master Protein	Q8K1G9	RNA helicase OS=Mus musculus OX=10090 GN=Dhx35 PE=1 SV=1	25	13	32	13	75.8	Dhx35	2.0792e+06	1.37418e+06	2.8694e+06	187797	1.79168e+06	1.65274e+06	1.73395e+07	1.74573e+07
High	Master Protein	Q921F2	TAR DNA-binding protein 43 OS=Mus musculus OX=10090 GN=Tardbp PE=1 SV=1	38	10	32	9	44.5	Tardbp	1.00314e+06	518599	64498.2	19735.5	675022	1.58773e+06	3.49464e+07	2.19967e+07
High	Master Protein	P21614	Vitamin D-binding protein OS=Mus musculus OX=10090 GN=Gc PE=1 SV=2	30	13	32	13	53.6	Gc	182152	174138	209783	49141.6	373982	1.10401e+06	4.25809e+07	1.6112e+07
High	Master Protein	Q6ZWY3	40S ribosomal protein S27-like OS=Mus musculus OX=10090 GN=Rps27l PE=1 SV=3	38	3	31	1	9.5	Rps27l	132867	27129.4	30890	4792.46	211736	239207
High	Master Protein	P27659	60S ribosomal protein L3 OS=Mus musculus OX=10090 GN=Rpl3 PE=1 SV=3	33	14	31	14	46.1	Rpl3	2.82554e+06	1.9218e+06	1.12383e+06	260201	4.70554e+06	4.53989e+06	2.34293e+07	8.53746e+06
High	Master Protein	F7DBB3	AHNAK nucleoprotein 2 (Fragment) OS=Mus musculus OX=10090 GN=Ahnak2 PE=1 SV=1	20	7	31	7	166.4		416515	269595	389215		642571	1.11281e+06	1.48908e+07	5.64259e+06
High	Master Protein	P63277	Amelogenin, X isoform OS=Mus musculus OX=10090 GN=Amelx PE=2 SV=1	8	2	31	1	23.5	Amelx	70568.4	41931.4	53083.9		169292	695693	16243913	10025090
High	Master Protein	Q99MQ4	Asporin OS=Mus musculus OX=10090 GN=Aspn PE=1 SV=1	35	13	31	13	42.5	Aspn	36491.2	22170.5			144395	357540	2.5963e+07	8.25557e+06
High	Master Protein	Q91YH5	Atlastin-3 OS=Mus musculus OX=10090 GN=Atl3 PE=1 SV=1	35	13	31	13	60.5	Atl3	192986	67318.9	44142.2	886386	101757	255994	1.86751e+07	7.07699e+06
High	Master Protein	Q8BMD8	Calcium-binding mitochondrial carrier protein SCaMC-1 OS=Mus musculus OX=10090 GN=Slc25a24 PE=1 SV=1	43	14	31	14	52.9	Slc25a24	3.47961e+06	1.37542e+06	499889	355396	4.31725e+06	3.07133e+06	1.83037e+07	1.00452e+07
High	Master Protein	Q3TPJ8	Cytoplasmic dynein 1 intermediate chain 2 OS=Mus musculus OX=10090 GN=Dync1i2 PE=1 SV=1	30	12	31	10	70.6	Dync1i2	329757	191451	245370		494950	839265	1.58323e+07	5.40009e+06
High	Master Protein	E9Q586	Dynactin subunit 1 OS=Mus musculus OX=10090 GN=Dctn1 PE=1 SV=1	26	24	31	24	136.8	Dctn1	344248	321897	215645	468043	595502	1.00043e+06	1.7966e+07	4.94264e+06
High	Master Protein	Q924C1	Exportin-5 OS=Mus musculus OX=10090 GN=Xpo5 PE=1 SV=1	12	11	31	11	136.9	Xpo5	991405	933525	1.12614e+06	257960	1.16471e+06	1.24367e+06	2.96509e+06	3.24674e+06
High	Master Protein	A2AJ72	Far upstream element (FUSE)-binding protein 3 OS=Mus musculus OX=10090 GN=Fubp3 PE=1 SV=1	33	17	31	16	61.4	Fubp3	266328	169826	206294	72074.2	114858	279548	1.20887e+07	5.24614e+06
High	Master Protein	E9QMH7	Inhibitor of nuclear factor kappa-B kinase-interacting protein OS=Mus musculus OX=10090 GN=Ikbip PE=1 SV=1	42	14	31	14	42.5	Ikbip	143341	129800	109708	33173.1	93785.2	358053	2.84787e+07	1.45701e+07
High	Master Protein	Q9DCL9	Multifunctional protein ADE2 OS=Mus musculus OX=10090 GN=Paics PE=1 SV=4	33	13	31	13	47	Paics	857787	486997	204995	164978	851139	1.20435e+06	1.19443e+07	4.7817e+06
High	Master Protein	Q91WD5	NADH dehydrogenase [ubiquinone] iron-sulfur protein 2, mitochondrial OS=Mus musculus OX=10090 GN=Ndufs2 PE=1 SV=1	43	15	31	15	52.6	Ndufs2	369374	252321	235230	275031	451095	497523	1.36018e+07	1.18114e+07
High	Master Protein	B2RXT3	Ogdhl protein OS=Mus musculus OX=10090 GN=Ogdhl PE=1 SV=1	15	15	31	5	114.5	Ogdhl	76426.9	32790.5	34075.9	73702.7	90293.1	174028	2.03021e+06	980505
High	Master Protein	Q11011	Puromycin-sensitive aminopeptidase OS=Mus musculus OX=10090 GN=Npepps PE=1 SV=2	29	20	31	20	103.3	Npepps	1.10669e+06	200986	599291	104981	1.24822e+06	1.81495e+06	7.68938e+07	4.71383e+07
High	Master Protein	Q9EPU0	Regulator of nonsense transcripts 1 OS=Mus musculus OX=10090 GN=Upf1 PE=1 SV=2	23	20	31	20	123.9	Upf1	783586	580438	704762	99728.5	713358	2.03528e+06	2.01097e+07	7.24944e+06
High	Master Protein	B7ZC46	Septin-8 OS=Mus musculus OX=10090 GN=Septin8 PE=1 SV=1	32	12	31	7	50.9	Sept8	123977	135838	87073.2	20845	152568	219309	7.66732e+06	3.01232e+06
High	Master Protein	A2AL85	Aspartyl/asparaginyl beta-hydroxylase OS=Mus musculus OX=10090 GN=Asph PE=1 SV=1	26	15	30	15	81.4	Asph	403697	286717	298604	35916.7	453109	1.25719e+06	1.74055e+07	4.06502e+06
High	Master Protein	P00920	Carbonic anhydrase 2 OS=Mus musculus OX=10090 GN=Ca2 PE=1 SV=4	63	11	30	11	29	Car2	56420.1	53849.2	13519.6	17300	64898.7	1.04205e+06	3.1662e+07	2.84836e+07
High	Master Protein	P97399	Dentin sialophosphoprotein OS=Mus musculus OX=10090 GN=Dspp PE=1 SV=2	11	6	30	6	93.9	Dspp				8596.01	18386	1.02151e+06	4.28427e+07	2.59999e+07
High	Master Protein	Q99KJ8	Dynactin subunit 2 OS=Mus musculus OX=10090 GN=Dctn2 PE=1 SV=3	47	14	30	14	44.1	Dctn2		140656	27872.7	22145.5	116263	485386	2.08194e+07	9.48267e+06
High	Master Protein	Q61553	Fascin OS=Mus musculus OX=10090 GN=Fscn1 PE=1 SV=4	34	14	30	14	54.5	Fscn1	307989	249002	152741	175576	863553	1.0801e+06	2.93976e+07	7.73755e+06
High	Master Protein	Q61584	Fragile X mental retardation syndrome-related protein 1 OS=Mus musculus OX=10090 GN=Fxr1 PE=1 SV=2	11	8	30	6	76.2	Fxr1	1.66789e+06	1.21076e+06	1.90974e+06	469162	1.25264e+06	1.65668e+06	4.54463e+06	2.42896e+06
High	Master Protein	Q922Q8	Leucine-rich repeat-containing protein 59 OS=Mus musculus OX=10090 GN=Lrrc59 PE=1 SV=1	47	11	30	11	34.9	Lrrc59	399725	348579	23938.4	190829	726606	958957	1.0198e+07	1.06226e+07
High	Master Protein	D3YUM1	NADH dehydrogenase [ubiquinone] flavoprotein 1, mitochondrial OS=Mus musculus OX=10090 GN=Ndufv1 PE=1 SV=1	36	14	30	14	49.9		213999	262221	236552	77196.6	271208	656764	2.36992e+07	1.94735e+07
High	Master Protein	Q5SWD9	Pre-rRNA-processing protein TSR1 homolog OS=Mus musculus OX=10090 GN=Tsr1 PE=1 SV=1	17	9	30	9	92	Tsr1	757066	268934	471880	64436.4	383374	976930	223416	256572
High	Master Protein	P67778	Prohibitin OS=Mus musculus OX=10090 GN=Phb PE=1 SV=1	56	13	30	13	29.8	Phb	638670	432093	136712	3.71889e+06	623153	1.3941e+06	1.77272e+07	1.22931e+07
High	Master Protein	A0A1B0GSG5	Ribonuclease inhibitor OS=Mus musculus OX=10090 GN=Rnh1 PE=1 SV=1	29	10	30	10	53.9	Rnh1	194751	291105	199717		746578	941984	2.12821e+07	9.56677e+06
High	Master Protein	Q9EQH3	Vacuolar protein sorting-associated protein 35 OS=Mus musculus OX=10090 GN=Vps35 PE=1 SV=1	28	19	30	19	91.7	Vps35	418371	241666	283333		655908	1.11307e+06	1.89033e+07	2.56123e+06
High	Master Protein	P62960	Y-box-binding protein 1 OS=Mus musculus OX=10090 GN=Ybx1 PE=1 SV=3	57	8	30	5	35.7	Ybx1	2.03751e+06	287396	514877	87179.6	977230	6.4711e+06	8.49331e+06	6.53598e+06
High	Master Protein	P14685	26S proteasome non-ATPase regulatory subunit 3 OS=Mus musculus OX=10090 GN=Psmd3 PE=1 SV=3	28	12	29	12	60.7	Psmd3	878139	474765	509679	65267.5	829034	1.16199e+06	4.55849e+06	1.46754e+06
High	Master Protein	G3UYV7	40S ribosomal protein S28 (Fragment) OS=Mus musculus OX=10090 GN=Rps28 PE=1 SV=1	57	3	29	3	6.3		548693	442602	230343	440038	1.11808e+06	1.56687e+06	2.3232e+06	1.88807e+06
High	Master Protein	Q8R5C5	Beta-centractin OS=Mus musculus OX=10090 GN=Actr1b PE=1 SV=1	55	12	29	6	42.3	Actr1b	107659	51441.6	6818.38	88163.9	89241.7	292618	7.54884e+06	4.78053e+06
High	Master Protein	Q99LB4	Capping protein (Actin filament), gelsolin-like OS=Mus musculus OX=10090 GN=Capg PE=1 SV=1	41	10	29	10	38.7	Capg	290506	301681	43486.1	76453.8	1.08286e+06	1.57083e+06	2.0585e+07	1.67454e+07
High	Master Protein	Q9ERK4	Exportin-2 OS=Mus musculus OX=10090 GN=Cse1l PE=1 SV=1	18	15	29	15	110.4	Cse1l	1.20573e+06	804061	1.03741e+06	103310	1.32871e+06	1.71131e+06	7.62095e+06	1.4453e+06
High	Master Protein	Q80XR6	Heterogeneous nuclear ribonucleoprotein A/B OS=Mus musculus OX=10090 GN=Hnrnpab PE=1 SV=1	30	9	29	9	33.8	Hnrnpab	229770	68592.9	29743.4		309463	997003	1.06697e+07	7.39712e+06
High	Master Protein	Q8VHM5	Heterogeneous nuclear ribonucleoprotein R OS=Mus musculus OX=10090 GN=Hnrnpr PE=1 SV=1	28	14	29	10	70.8	Hnrnpr	40117.8	69596.9	118679	123807	50105.8	311882	1.19364e+07	3.62768e+06
High	Master Protein	Q9EPL8	Importin-7 OS=Mus musculus OX=10090 GN=Ipo7 PE=1 SV=2	16	12	29	12	119.4	Ipo7	749798	815908	813601	237534	980697	1.113e+06	957537	344061
High	Master Protein	Q61033	Lamina-associated polypeptide 2, isoforms alpha/zeta OS=Mus musculus OX=10090 GN=Tmpo PE=1 SV=4	23	10	29	3	75.1	Tmpo	141616	50525.9	127375	8168.59	56660.8	99301.2	218581	175868
High	Master Protein	A0A0R4J086	Olfactomedin-like protein 3 OS=Mus musculus OX=10090 GN=Olfml3 PE=1 SV=1	25	11	29	11	45.8	Olfml3	195657	82706.6	136847	47797.5	153030	705091	3.19251e+07	1.80577e+07
High	Master Protein	P30416	Peptidyl-prolyl cis-trans isomerase FKBP4 OS=Mus musculus OX=10090 GN=Fkbp4 PE=1 SV=5	25	9	29	9	51.5	Fkbp4	615626	510160	358185	23706.9	1.10149e+06	1.4496e+06	1.58773e+07	4.61191e+06
High	Master Protein	Q9CQF9	Prenylcysteine oxidase OS=Mus musculus OX=10090 GN=Pcyox1 PE=1 SV=1	38	12	29	12	56.5	Pcyox1	52394.9		81006.1	54720.2	79947.2	147275	1.17368e+07	6.52977e+06
High	Master Protein	Q99JI6	Ras-related protein Rap-1b OS=Mus musculus OX=10090 GN=Rap1b PE=1 SV=2	42	9	29	9	20.8	Rap1b	177093	170486	96000.9		345347	726430	1.28438e+07	1.01332e+07
High	Master Protein	Q99P72	Reticulon-4 OS=Mus musculus OX=10090 GN=Rtn4 PE=1 SV=2	14	8	29	8	126.5	Rtn4	914716	806433	119208		2.45854e+06	1.94151e+06	1.93141e+06	2.94398e+06
High	Master Protein	G3X8T9	Serine protease inhibitor A3N OS=Mus musculus OX=10090 GN=Serpina3n PE=1 SV=1	24	8	29	6	46.7	Serpina3n	43454.7	35066.6	36084.4		15503.7	498665	1.9753e+07	2.20063e+07
High	Master Protein	Q9WVA4	Transgelin-2 OS=Mus musculus OX=10090 GN=Tagln2 PE=1 SV=4	72	13	29	13	22.4	Tagln2	373927	186431	18529.5	28744.3	919526	1.28032e+06	2.11589e+07	1.02008e+07
High	Master Protein	Q99N15	17beta-hydroxysteroid dehydrogenase type 10/short chain L-3-hydroxyacyl-CoA dehydrogenase OS=Mus musculus OX=10090 GN=Hsd17b10 PE=1 SV=1	59	11	28	11	27.3	Hsd17b10	107520	23496.6	24300.1		138838	284824	6.72272e+06	6.9626e+06
High	Master Protein	P47739	Aldehyde dehydrogenase, dimeric NADP-preferring OS=Mus musculus OX=10090 GN=Aldh3a1 PE=1 SV=2	29	14	28	13	50.4	Aldh3a1	546995	369061	324084		656857	1.56442e+06	7.40134e+07	5.18211e+06
High	Master Protein	O55189	Ameloblastin OS=Mus musculus OX=10090 GN=Ambn PE=2 SV=1	26	6	28	6	43.6	Ambn	1.1637e+06	360085	230932	845221	784949	2.51364e+06	2.27669e+07	7.24746e+06
High	Master Protein	Q9DB20	ATP synthase subunit O, mitochondrial OS=Mus musculus OX=10090 GN=Atp5po PE=1 SV=1	69	13	28	13	23.3	Atp5o; LOC100047429; LOC102641678	398639	167482	51250.3	23953.7	467599	1.27198e+06	1.57303e+07	2.01936e+07
High	Master Protein	Q9Z1Q5	Chloride intracellular channel protein 1 OS=Mus musculus OX=10090 GN=Clic1 PE=1 SV=3	47	9	28	8	27	Clic1	613090	295827	70248.9		1.12027e+06	1.01491e+06	1.17945e+07	6.49892e+06
High	Master Protein	Q99KK7	Dipeptidyl peptidase 3 OS=Mus musculus OX=10090 GN=Dpp3 PE=1 SV=2	23	15	28	15	82.8	Dpp3	103706	114692	51591.7	106912	205945	667748	2.55442e+07	6.33832e+06
High	Master Protein	P60229	Eukaryotic translation initiation factor 3 subunit E OS=Mus musculus OX=10090 GN=Eif3e PE=1 SV=1	38	14	28	14	52.2	Eif3e	1.12605e+06	1.31895e+06	926411	649578	1.4281e+06	1.64298e+06	1.68668e+07	7.22385e+06
High	Master Protein	E9Q0B5	Fc fragment of IgG-binding protein OS=Mus musculus OX=10090 GN=Fcgbp PE=1 SV=1	0	1	28	1	275		35293792	5.6421e+06	10569073	3.08182e+06	16012323	45565312	2702057	15794823
High	Master Protein	F8WHM5	Golgi apparatus protein 1 (Fragment) OS=Mus musculus OX=10090 GN=Glg1 PE=1 SV=1	14	17	28	17	132.3		203636	57123.8	69959.6	901170	208449	733719	2.33148e+07	8.94351e+06
High	Master Protein	P01812	Ig heavy chain V region MOPC 173 OS=Mus musculus OX=10090 PE=1 SV=1	48	5	28	1	13		35666.8	51316.1	16660.8	36305.7	43213	98445	7760.14
High	Master Protein	A0A075B5N4	Immunoglobulin kappa chain variable 8-27 OS=Mus musculus OX=10090 GN=Igkv8-27 PE=4 SV=1	61	5	28	2	11		361027	182521	32123.2		461412	491868
High	Master Protein	Q80X72	Leucine-rich repeat-containing protein 15 OS=Mus musculus OX=10090 GN=Lrrc15 PE=2 SV=1	32	11	28	11	64.1	Lrrc15	31130.9	22914.6	37726.6	24547.8		33043.6	2.15645e+07	7.52643e+06
High	Master Protein	Q9CR62	Mitochondrial 2-oxoglutarate/malate carrier protein OS=Mus musculus OX=10090 GN=Slc25a11 PE=1 SV=3	40	11	28	11	34.1	Slc25a11	797144	416241	29565.5	334511	1.1767e+06	1.43617e+06	1.27704e+06	1.66825e+06
High	Master Protein	P08553	Neurofilament medium polypeptide OS=Mus musculus OX=10090 GN=Nefm PE=1 SV=4	4	4	28	1	95.9	Nefm						13838.3	371317
High	Master Protein	Q8C0C7	Phenylalanine--tRNA ligase alpha subunit OS=Mus musculus OX=10090 GN=Farsa PE=1 SV=1	36	15	28	15	57.6	Farsa	618878	426601	397160		776106	924012	1.01797e+07	2.90225e+06
High	Master Protein	P97370	Sodium/potassium-transporting ATPase subunit beta-3 OS=Mus musculus OX=10090 GN=Atp1b3 PE=1 SV=1	41	11	28	11	31.8	Atp1b3	83164.4	62849.3	4467.1		72095	674522	2.54962e+07	3.67809e+07
High	Master Protein	Q9D1D4	Transmembrane emp24 domain-containing protein 10 OS=Mus musculus OX=10090 GN=Tmed10 PE=1 SV=1	44	8	28	8	24.9	Tmed10	221282	44175.9	32733.5	19891.6	220408	872583	1.16471e+07	1.24127e+07
High	Master Protein	G3UY93	Valyl-tRNA synthetase (Fragment) OS=Mus musculus OX=10090 GN=Vars PE=1 SV=1	17	16	28	16	141.3		924237	1.20579e+06	644541	478070	1.34802e+06	1.57542e+06	1.04106e+07	4.1538e+06
High	Master Protein	Q8VDM4	26S proteasome non-ATPase regulatory subunit 2 OS=Mus musculus OX=10090 GN=Psmd2 PE=1 SV=1	10	7	27	7	100.1	Psmd2	817589	758201	642554		1.25154e+06	1.08291e+06	2.81782e+06	995416
High	Master Protein	P12970	60S ribosomal protein L7a OS=Mus musculus OX=10090 GN=Rpl7a PE=1 SV=2	33	10	27	10	30	Rpl7a	2.04804e+06	529381	380935	131924	2.71531e+06	2.41157e+06	7.79426e+06	6.21175e+06
High	Master Protein	P12658	Calbindin OS=Mus musculus OX=10090 GN=Calb1 PE=1 SV=2	62	13	27	13	30	Calb1	200158	106604	138943	29617	159619	1.1261e+06	2.48171e+07	3.98004e+06
High	Master Protein	Q9QZE5	Coatomer subunit gamma-1 OS=Mus musculus OX=10090 GN=Copg1 PE=1 SV=1	16	10	27	10	97.5	Copg; Copg1	555937	377275	443119	132031	761654	804991	1.36446e+07	3.96471e+06
High	Master Protein	Q8JZN5	Complex I assembly factor ACAD9, mitochondrial OS=Mus musculus OX=10090 GN=Acad9 PE=1 SV=2	27	13	27	13	68.7	Acad9	221553	74092	160206	15328.3	122061	523714	1.21079e+07	5.52593e+06
High	Master Protein	Q9WVK4	EH domain-containing protein 1 OS=Mus musculus OX=10090 GN=Ehd1 PE=1 SV=1	43	18	27	15	60.6	Ehd1	555850	238692	272069	302634	704922	1.06398e+06	1.43443e+07	3.67677e+06
High	Master Protein	Q922J9	Fatty acyl-CoA reductase 1 OS=Mus musculus OX=10090 GN=Far1 PE=1 SV=1	26	12	27	12	59.4	Far1	2.46907e+06	1.28766e+06	2.06395e+06	12908	2.41512e+06	2.59929e+06	929492	603922
High	Master Protein	P47791	Glutathione reductase, mitochondrial OS=Mus musculus OX=10090 GN=Gsr PE=1 SV=3	35	11	27	11	53.6	Gsr	176686	393682	541819		116933	579013	1.82289e+07	9.91035e+06
High	Master Protein	O09131	Glutathione S-transferase omega-1 OS=Mus musculus OX=10090 GN=Gsto1 PE=1 SV=2	40	10	27	10	27.5	Gsto1	623992	407109	636381		2.44681e+06	1.64704e+06	5.93365e+06	1.39318e+06
High	Master Protein	P01635	Ig kappa chain V-V region K2 (Fragment) OS=Mus musculus OX=10090 PE=1 SV=1	28	3	27	1	12.6	Igkv12-41	3.44599e+06	2.05333e+06	935153	516612	4.47311e+06	4.27676e+06	1.01625e+06	653411
High	Master Protein	A0A075B5M2	Immunoglobulin kappa chain variable 4-61 OS=Mus musculus OX=10090 GN=Igkv4-61 PE=4 SV=7	31	2	27	2	10.1		3.3693e+06	2.04186e+06	833321	647863	4.19321e+06	3.62302e+06	69171.6	25072.2
High	Master Protein	A0A140T8M3	Immunoglobulin kappa chain variable 8-30 (Fragment) OS=Mus musculus OX=10090 GN=Igkv8-30 PE=4 SV=2	50	5	27	2	13.3	Igkv8-30	1.50806e+06	652793	199712	846979	1.51728e+06	3.49749e+06	1.76344e+06	1.0124e+06
High	Master Protein	A0A075B5K2	Immunoglobulin kappa chain variable 9-124 OS=Mus musculus OX=10090 GN=Igkv9-124 PE=1 SV=7	34	2	27	2	10.4		1.05264e+06	439473	202673	360786	736985	946066	450066	541646
High	Master Protein	A0A075B5M4	Immunoglobulin kappa variable 4-57-1 (Fragment) OS=Mus musculus OX=10090 GN=Igkv4-57-1 PE=4 SV=1	32	3	27	2	12.7	LOC675950	1.42314e+06	346995	225873	1.36229e+06	1.67103e+06	2.97812e+06	9.97365e+06	1.98154e+06
High	Master Protein	A0A140T8M4	Immunoglobulin kappa variable 8-19 OS=Mus musculus OX=10090 GN=Igkv8-19 PE=1 SV=2	46	4	27	1	11.1		153935	61011.4		47560	162072	158637	43778.8
High	Master Protein	P21956	Lactadherin OS=Mus musculus OX=10090 GN=Mfge8 PE=1 SV=3	30	12	27	12	51.2	Mfge8	4.43991e+06	1.16215e+06	1.16717e+06	15193.4	1.38087e+06	1.78132e+06	1.34211e+07	9.81844e+06
High	Master Protein	A0A5F8MPM4	Myelin peripheral protein OS=Mus musculus OX=10090 GN=Mpz PE=1 SV=1	23	8	27	8	34.5		182783	169960	218475	24520	373122	2.3303e+06	4.45359e+07	2.51937e+07
High	Master Protein	O35129	Prohibitin-2 OS=Mus musculus OX=10090 GN=Phb2 PE=1 SV=1	53	13	27	13	33.3	Phb2	589261	280200	83930.3	10127.6	795499	1.05793e+06	1.22734e+07	1.18141e+07
High	Master Protein	E9Q3E2	Synaptopodin OS=Mus musculus OX=10090 GN=Synpo PE=1 SV=1	23	20	27	6	117.4	Synpo	4.23221e+06	808860	2.19875e+06	14711.9	310947	562520	1.19909e+07	5.54191e+06
High	Master Protein	D3Z2H9	Tropomyosin 3, related sequence 7 OS=Mus musculus OX=10090 GN=Tpm3-rs7 PE=3 SV=1	41	14	27	2	29		133980	111833	77791.3		562888	447254	4.21776e+06	2.18764e+06
High	Master Protein	Q3U367	4-trimethylaminobutyraldehyde dehydrogenase OS=Mus musculus OX=10090 GN=Aldh9a1 PE=1 SV=1	29	12	26	12	55.9	Aldh9a1	289011	146557	153704	26678.7	335812	724482	2.73395e+07	1.57994e+07
High	Master Protein	E9PUD2	Dynamin-1-like protein OS=Mus musculus OX=10090 GN=Dnm1l PE=1 SV=1	33	15	26	15	79.5	Dnm1l	94204	141291	95625.5	4217.82	352871	412179	6.38418e+06	2.23717e+06
High	Master Protein	A0A0A6YX66	Immunoglobulin heavy variable V1-20 (Fragment) OS=Mus musculus OX=10090 GN=Ighv1-20 PE=4 SV=1	35	4	26	2	13.1	LOC672918	2.71664e+06	2.03937e+06	1.91218e+06	1.20834e+06	4.64974e+06	4.25648e+06	1.11782e+07	9.91835e+06
High	Master Protein	Q9R0E1	Multifunctional procollagen lysine hydroxylase and glycosyltransferase LH3 OS=Mus musculus OX=10090 GN=Plod3 PE=1 SV=1	16	10	26	9	84.9	Plod3	715513	297553	667954		598000	951020	7.42341e+06	3.96388e+06
High	Master Protein	A0A1W2P6F6	Myosin light polypeptide 6 OS=Mus musculus OX=10090 GN=Myl6 PE=1 SV=1	63	8	26	8	17		231388	177824	137211	70320.1	581800	1.15944e+06	1.52345e+07	1.18151e+07
High	Master Protein	A0A571BEN1	Myosin-binding protein C, slow-type OS=Mus musculus OX=10090 GN=Mybpc1 PE=1 SV=1	24	24	26	23	127.9		7.67866e+06	5.50752e+06	3.59019e+06	5.51073e+06	1.19685e+07	1.20629e+07	1.00725e+07	2.29761e+07
High	Master Protein	Q7M739	Nucleoprotein TPR OS=Mus musculus OX=10090 GN=Tpr PE=1 SV=1	11	19	26	19	266.8	Tpr	63655	98538.4	159606	45925.8	33951.6	94252	1.13019e+07	6.15395e+06
High	Master Protein	Q91ZA3	Propionyl-CoA carboxylase alpha chain, mitochondrial OS=Mus musculus OX=10090 GN=Pcca PE=1 SV=2	30	16	26	16	79.9	Pcca	4.62889e+06	637471	3.04478e+06		13813	3.16964e+06	1.58295e+07	9.36745e+06
High	Master Protein	Q922Q2	Serine/threonine-protein kinase RIO1 OS=Mus musculus OX=10090 GN=Riok1 PE=1 SV=2	16	8	26	8	64.9	Riok1	1.39335e+06	1.04333e+06	948932	165192	1.92801e+06	2.46124e+06	1.03247e+07	2.51431e+06
High	Master Protein	Q921M3	Splicing factor 3B subunit 3 OS=Mus musculus OX=10090 GN=Sf3b3 PE=1 SV=1	15	14	26	14	135.5	Sf3b3	565876	313823	842811	10461.8	435428	530353	1.0018e+07	3.63794e+06
High	Master Protein	D3Z6I8	Tropomyosin alpha-3 chain OS=Mus musculus OX=10090 GN=Tpm3 PE=1 SV=1	40	13	26	1	28.7	Tpm3	29998.8		13607.2	29253.5	24214.6		395371
High	Master Protein	P84084	ADP-ribosylation factor 5 OS=Mus musculus OX=10090 GN=Arf5 PE=1 SV=2	49	6	25	2	20.5	Arf5		21433.3		10464			1.21299e+06	576540
High	Master Protein	Q9CYD3	Cartilage-associated protein OS=Mus musculus OX=10090 GN=Crtap PE=1 SV=3	26	11	25	11	46.1	Crtap	161899	86544	169636	82661.3	173258	594445	2.4105e+07	7.39853e+06
High	Master Protein	E9QAH1	Golgi autoantigen, golgin subfamily b, macrogolgin 1 OS=Mus musculus OX=10090 GN=Golgb1 PE=1 SV=1	8	20	25	20	365.1	Golgb1	147218	93709.9	49577.2	32734.8	142885	73204.6	9.04222e+06	5.98269e+06
High	Master Protein	Q60972	Histone-binding protein RBBP4 OS=Mus musculus OX=10090 GN=Rbbp4 PE=1 SV=5	24	9	25	3	47.6	Rbbp4	168135	120184	182533	9851.77	299699	329354	7.03354e+06	3.76094e+06
High	Master Protein	F6VSK8	Integrin alpha-6 (Fragment) OS=Mus musculus OX=10090 GN=Itga6 PE=1 SV=1	27	15	25	1	75							21202.9	602564	187717
High	Master Protein	A0A1L1STE6	Isocitrate dehydrogenase [NAD] subunit, mitochondrial OS=Mus musculus OX=10090 GN=Idh3a PE=1 SV=1	26	10	25	10	41.5		2.9669e+06	2.14351e+06	797448		4.59479e+06	6.34973e+06	9.60958e+07	6.21603e+07
High	Master Protein	Q924C6	Lysyl oxidase homolog 4 OS=Mus musculus OX=10090 GN=Loxl4 PE=2 SV=2	20	14	25	14	84.7	Loxl4	49804	98615	65144	60197	136061	356908	1.57289e+07	1.18142e+07
High	Master Protein	Q8VCW8	Medium-chain acyl-CoA ligase ACSF2, mitochondrial OS=Mus musculus OX=10090 GN=Acsf2 PE=1 SV=1	37	14	25	14	67.9	Acsf2	223259	242838	120281	234533	205748	644381	2.15683e+07	9.22046e+06
High	Master Protein	P17563	Methanethiol oxidase OS=Mus musculus OX=10090 GN=Selenbp1 PE=1 SV=2	47	16	25	16	52.5	Selenbp1	128817	118852	106276	77984.9	94808.7	428007	2.15976e+07	5.24696e+06
High	Master Protein	B1ARU4	Microtubule-actin cross-linking factor 1 OS=Mus musculus OX=10090 GN=Macf1 PE=1 SV=1	3	17	25	1	831.1	Macf1	118001	34879.4	49389.1	104471	19401.8	274339	6.77779e+06	2.20175e+06
High	Master Protein	Q7TPV4	Myb-binding protein 1A OS=Mus musculus OX=10090 GN=Mybbp1a PE=1 SV=2	9	8	25	8	151.9	Mybbp1a	762877	473240	629753	33078.2	839411	864382	2.20143e+06	1.01208e+06
High	Master Protein	Q02566	Myosin-6 OS=Mus musculus OX=10090 GN=Myh6 PE=1 SV=2	9	18	25	1	223.4	Myh6						85879.2	139186	6.76307e+06
High	Master Protein	P20918	Plasminogen OS=Mus musculus OX=10090 GN=Plg PE=1 SV=3	16	14	25	14	90.7	Plg	98599.9	86351.7	177960	10693.7	187043	554039	2.78056e+07	1.71657e+07
High	Master Protein	Q9R0E2	Procollagen-lysine,2-oxoglutarate 5-dioxygenase 1 OS=Mus musculus OX=10090 GN=Plod1 PE=1 SV=1	20	12	25	11	83.5	Plod1	149809	79963.8	153213		118283	435474	1.28268e+07	5.97163e+06
High	Master Protein	Q62433	Protein NDRG1 OS=Mus musculus OX=10090 GN=Ndrg1 PE=1 SV=1	33	8	25	8	43	Ndrg1	73422.3	135851	65872.9	89328	354391	476367	1.40187e+07	5.88607e+06
High	Master Protein	Q05186	Reticulocalbin-1 OS=Mus musculus OX=10090 GN=Rcn1 PE=1 SV=1	47	11	25	11	38.1	Rcn1	183448	152808	13320.7	112859	586567	1.33157e+06	2.3652e+07	1.57863e+07
High	Master Protein	Q9CZC8	Secernin-1 OS=Mus musculus OX=10090 GN=Scrn1 PE=1 SV=1	27	9	25	9	46.3	Scrn1	35190.7	18054.1	72817.4		22110.5	256015	1.70772e+07	7.75533e+06
High	Master Protein	P62274	40S ribosomal protein S29 OS=Mus musculus OX=10090 GN=Rps29 PE=1 SV=2	50	4	24	4	6.7	Rps29	2.38344e+06	792617	762034	1.53673e+06	4.21542e+06	2.84777e+06	530121	376419
High	Master Protein	Q61503	5'-nucleotidase OS=Mus musculus OX=10090 GN=Nt5e PE=1 SV=2	24	11	24	11	63.8	Nt5e		207111			201786	173261	9.61412e+06	6.80443e+06
High	Master Protein	P14869	60S acidic ribosomal protein P0 OS=Mus musculus OX=10090 GN=Rplp0 PE=1 SV=3	31	7	24	7	34.2	Rplp0	1.29884e+06	869517	119197	140432	2.25802e+06	2.10168e+06	2.80634e+06	3.4222e+06
High	Master Protein	P47911	60S ribosomal protein L6 OS=Mus musculus OX=10090 GN=Rpl6 PE=1 SV=3	35	9	24	9	33.5	Rpl6	1.68614e+06	644990	283190		2.65055e+06	2.84653e+06	5.02826e+06	2.02384e+06
High	Master Protein	P97384	Annexin A11 OS=Mus musculus OX=10090 GN=Anxa11 PE=1 SV=2	29	14	24	13	54	Anxa11	131282	125542	120390	12000.4	253420	703882	1.4183e+07	6.44794e+06
High	Master Protein	Q3TVK3	Aspartyl aminopeptidase OS=Mus musculus OX=10090 GN=Dnpep PE=1 SV=1	37	11	24	11	52.4	Dnpep	86820.1	82372	33230.7	487690	168055	434347	1.02785e+07	4.54378e+06
High	Master Protein	Q8VDW0	ATP-dependent RNA helicase DDX39A OS=Mus musculus OX=10090 GN=Ddx39a PE=1 SV=1	22	9	24	2	49	Ddx39	77231.7		42002.4	9333.12		44202.4	84922.7	139084
High	Master Protein	Q9WV92	Band 4.1-like protein 3 OS=Mus musculus OX=10090 GN=Epb41l3 PE=1 SV=1	18	12	24	12	103.3	Epb4.1l3; Epb41l3	1.09543e+06	680991	699247	36309.9	1.12181e+06	1.29388e+06	6.68307e+06	2.82618e+06
High	Master Protein	P26231	Catenin alpha-1 OS=Mus musculus OX=10090 GN=Ctnna1 PE=1 SV=1	26	17	24	14	100	Ctnna1	783599	112576	236544	336149	316975	1.02863e+06	1.6095e+07	2.71029e+06
High	Master Protein	P00405	Cytochrome c oxidase subunit 2 OS=Mus musculus OX=10090 GN=Mtco2 PE=1 SV=1	26	5	24	5	26	COX2	180182	133624	36451.9	116319	170198	690846	1.38388e+07	1.55473e+07
High	Master Protein	D3Z158	Glutaminyl-tRNA synthetase OS=Mus musculus OX=10090 GN=Qars PE=1 SV=2	28	17	24	17	85		705209	353175	824430	90730	574750	1.2018e+06	1.41615e+07	6.32421e+06
High	Master Protein	Q60973	Histone-binding protein RBBP7 OS=Mus musculus OX=10090 GN=Rbbp7 PE=1 SV=1	23	9	24	3	47.8	Rbbp7	434895	209945	215945		627149	1.29127e+06	2.22774e+07	9.88028e+06
High	Master Protein	P18524	Ig heavy chain V region RF OS=Mus musculus OX=10090 PE=1 SV=1	27	3	24	1	12.9	LOC641088	1.04868e+06	811814	625127	174724	1.33609e+06	1.53835e+06	479296	231319
High	Master Protein	A0A075B6A7	Immunoglobulin heavy variable 2-6 (Fragment) OS=Mus musculus OX=10090 GN=Ighv2-6 PE=4 SV=1	19	2	24	1	12.6	LOC674132	135272	104911	163895		560629	267157
High	Master Protein	A0A140T8N0	Immunoglobulin kappa chain variable 9-120 (Fragment) OS=Mus musculus OX=10090 GN=Igkv9-120 PE=1 SV=2	31	2	24	2	12.8		930404	295298	137622	649388	452734	862218	54444.1	548894
High	Master Protein	A0A075B5M7	Immunoglobulin kappa variable 5-39 OS=Mus musculus OX=10090 GN=Igkv5-39 PE=1 SV=7	38	3	24	1	10.3		2.89697e+06	1.3991e+06	592590	502942	3.73045e+06	2.88519e+06	2.96478e+06	2.14031e+06
High	Master Protein	E9QKZ2	Importin-9 OS=Mus musculus OX=10090 GN=Ipo9 PE=1 SV=1	13	10	24	10	115.9	Ipo9	949730	661320	884355	173891	1.16329e+06	1.29113e+06	198102	315839
High	Master Protein	Q5SF07	Insulin-like growth factor 2 mRNA-binding protein 2 OS=Mus musculus OX=10090 GN=Igf2bp2 PE=1 SV=1	20	8	24	6	65.5	Igf2bp2	437669	338969	476013	12674.5	572598	553066	481817	249229
High	Master Protein	A2A863	Integrin beta-4 OS=Mus musculus OX=10090 GN=Itgb4 PE=1 SV=1	14	18	24	18	201.5	Itgb4		43574.6	84015.7		173636	82181	1.23783e+07	6.8138e+06
High	Master Protein	Q60749	KH domain-containing, RNA-binding, signal transduction-associated protein 1 OS=Mus musculus OX=10090 GN=Khdrbs1 PE=1 SV=2	24	8	24	7	48.3	Khdrbs1	547264	330796	708353		683595	1.26276e+06	2.23005e+07	8.12375e+06
High	Master Protein	Q9Z2I0	Mitochondrial proton/calcium exchanger protein OS=Mus musculus OX=10090 GN=Letm1 PE=1 SV=1	29	13	24	13	82.9	Letm1	102836	454284	109774	791843	148785	1.83372e+06	1.11607e+07	3.71169e+06
High	Master Protein	P05977	Myosin light chain 1/3, skeletal muscle isoform OS=Mus musculus OX=10090 GN=Myl1 PE=1 SV=2	70	13	24	12	20.6	Myl1	65359.9	57600.9	157487	294401	154968	63153.6	839625	8.08015e+07
High	Master Protein	P08551	Neurofilament light polypeptide OS=Mus musculus OX=10090 GN=Nefl PE=1 SV=5	12	6	24	4	61.5	Nefl	15971.8	33388.7	32203.4		29326.1	110146	6.81076e+06	1.55035e+06
High	Master Protein	Q61937	Nucleophosmin OS=Mus musculus OX=10090 GN=Npm1 PE=1 SV=1	21	6	24	6	32.5	Npm1	1.22055e+06	627526	122520	5238.19	2.4725e+06	2.2165e+06	266078	181045
High	Master Protein	A0A1L1SSH9	Osteonectin OS=Mus musculus OX=10090 GN=Sparc PE=1 SV=1	18	7	24	7	37.8		486939				99236	1.15174e+06	2.9545e+07	3.59648e+07
High	Master Protein	G3UXA6	Polypyrimidine tract-binding protein 3 OS=Mus musculus OX=10090 GN=Ptbp3 PE=1 SV=1	20	8	24	5	59.7	Ptbp3; Rod1		17111.5	21303.1		54280.8	148556	4.13604e+06	1.86582e+06
High	Master Protein	Q8K411	Presequence protease, mitochondrial OS=Mus musculus OX=10090 GN=Pitrm1 PE=1 SV=1	20	16	24	16	117.3	Pitrm1	229099	159465	195919	58493.3	431220	562051	1.21812e+07	5.42971e+06
High	Master Protein	Q6PDI5	Proteasome adapter and scaffold protein ECM29 OS=Mus musculus OX=10090 GN=Ecpas PE=1 SV=3	10	13	24	13	203.6	AI314180	445537	258184	428435	56985.8	289076	750456	3.42937e+06	1.20279e+06
High	Master Protein	A0A0N4SW73	Rab11 family-interacting protein 5 OS=Mus musculus OX=10090 GN=Rab11fip5 PE=1 SV=1	12	11	24	11	139.5	Rab11fip5	1.03185e+06	696664	966224	18094.7	778491	1.15471e+06	2.83557e+06	314489
High	Master Protein	H3BKU1	Serine/threonine-protein phosphatase 2A 65 kDa regulatory subunit A beta isoform OS=Mus musculus OX=10090 GN=Ppp2r1b PE=1 SV=1	15	8	24	3	73.3	Ppp2r1b		32628.2	10582.2		23300.7	74543.7	1.21096e+06	292335
High	Master Protein	Q9D8L3	Signal sequence receptor subunit delta OS=Mus musculus OX=10090 GN=Ssr4 PE=1 SV=1	40	6	24	6	19	Ssr4	1.119e+06	424668	323168	106847	791619	2.03789e+06	1.64424e+07	1.69697e+07
High	Master Protein	A0A0G2JDV6	Ubiquitin-associated protein 2-like OS=Mus musculus OX=10090 GN=Ubap2l PE=1 SV=1	12	9	24	9	112.4	Ubap2l	193147	246115	517402		354416	654074	6.90107e+06	2.70004e+06
High	Master Protein	Q3TW96	UDP-N-acetylhexosamine pyrophosphorylase-like protein 1 OS=Mus musculus OX=10090 GN=Uap1l1 PE=1 SV=1	26	12	24	12	56.6	Uap1l1	308259	142878	237116	54911.9	426261	673778	1.89319e+07	9.43057e+06
High	Master Protein	Q5SVG5	AP complex subunit beta OS=Mus musculus OX=10090 GN=Ap1b1 PE=1 SV=1	26	15	23	9	101.1	Ap1b1	77947.9	143804	83974.9	296137	117788	46015.6	6.40547e+06	1.01607e+06
High	Master Protein	P10605	Cathepsin B OS=Mus musculus OX=10090 GN=Ctsb PE=1 SV=2	31	8	23	8	37.3	Ctsb	240482	174420	338088	21580	504792	802185	1.33247e+07	1.28543e+07
High	Master Protein	Q61245	Collagen alpha-1(XI) chain OS=Mus musculus OX=10090 GN=Col11a1 PE=1 SV=2	6	7	23	6	180.9	Col11a1		11442.5	15201.6		27939.9	65398.4	4.77072e+06	4.68593e+06
High	Master Protein	Q00612	Glucose-6-phosphate 1-dehydrogenase X OS=Mus musculus OX=10090 GN=G6pdx PE=1 SV=3	28	12	23	12	59.2	G6pdx	603366	524531	602211	13555.3	1.0936e+06	1.45338e+06	1.71073e+07	6.64837e+06
High	Master Protein	D3YVW2	Golgi integral membrane protein 4 OS=Mus musculus OX=10090 GN=Golim4 PE=1 SV=1	24	13	23	13	79.9	Golim4	94644.6	56245.9	224751	13718.5	7.68613e+06	558090	1.92667e+07	8.36966e+06
High	Master Protein	Q8BKC5	Importin-5 OS=Mus musculus OX=10090 GN=Ipo5 PE=1 SV=3	15	12	23	12	123.5	Ipo5	350803	249870	196150	28209.2	400079	740678	5.0558e+06	523814
High	Master Protein	O88477	Insulin-like growth factor 2 mRNA-binding protein 1 OS=Mus musculus OX=10090 GN=Igf2bp1 PE=1 SV=1	19	9	23	8	63.4	Igf2bp1	1.15731e+06	737090	896701	101035	1.48641e+06	1.71435e+06	8.00695e+06	2.76169e+06
High	Master Protein	Q61703	Inter-alpha-trypsin inhibitor heavy chain H2 OS=Mus musculus OX=10090 GN=Itih2 PE=1 SV=1	18	12	23	12	105.9	Itih2	385450	92490.2	178783	60347.5	261870	505813	1.38042e+07	6.98478e+06
High	Master Protein	O08677	Kininogen-1 OS=Mus musculus OX=10090 GN=Kng1 PE=1 SV=1	19	12	23	10	73.1	Kng1	336905	300353	543802	84139.6	282111	895897	4.87404e+07	1.56991e+07
High	Master Protein	P26645	Myristoylated alanine-rich C-kinase substrate OS=Mus musculus OX=10090 GN=Marcks PE=1 SV=2	30	6	23	6	29.6	Marcks	411425	310042	243063	3771.02	609973	1.99021e+06	4.21252e+07	2.35578e+07
High	Master Protein	P37040	NADPH--cytochrome P450 reductase OS=Mus musculus OX=10090 GN=Por PE=1 SV=2	25	11	23	11	77	Por	364048	148050	136619		390371	831178	12975756	7.49952e+06
High	Master Protein	Q8BSH9	Nucleosome assembly protein 1-like 1 OS=Mus musculus OX=10090 GN=Nap1l1 PE=1 SV=1	20	6	23	6	44.6	Nap1l1	490757	256015	211679	63857.2	365847	868979	1.27351e+06	777336
High	Master Protein	O70250	Phosphoglycerate mutase 2 OS=Mus musculus OX=10090 GN=Pgam2 PE=1 SV=3	29	8	23	4	28.8	Pgam2		8175.84		3572.31		18826.4	740132	3.36371e+06
High	Master Protein	Q5SUR0	Phosphoribosylformylglycinamidine synthase OS=Mus musculus OX=10090 GN=Pfas PE=1 SV=1	15	14	23	14	144.5	Pfas	81613.8	58738.4	92058.5	506604	208643	540983	8.1888e+06	4.09523e+06
High	Master Protein	Q3UPH1	Protein PRRC1 OS=Mus musculus OX=10090 GN=Prrc1 PE=1 SV=1	26	8	23	8	46.3	Prrc1	122275	106337	138544	13801.4	117032	418431	1.99809e+07	8.33522e+06
High	Master Protein	Q9WTM5	RuvB-like 2 OS=Mus musculus OX=10090 GN=Ruvbl2 PE=1 SV=3	30	12	23	12	51.1	Ruvbl2	891865	302104	394871	41187.9	558551	1.01395e+06	1.37145e+07	5.57182e+06
High	Master Protein	Q9JMH6	Thioredoxin reductase 1, cytoplasmic OS=Mus musculus OX=10090 GN=Txnrd1 PE=1 SV=3	28	12	23	12	67	Txnrd1	164696	88584.7	120957	188963	299956	579085	1.49447e+07	6.17479e+06
High	Master Protein	Q9D7S7	60S ribosomal protein L22-like 1 OS=Mus musculus OX=10090 GN=Rpl22l1 PE=1 SV=1	32	3	22	3	14.5	Rpl22l1	2.56808e+06	920937	706775	728684	3.10437e+06	3.80887e+06
High	Master Protein	P45376	Aldo-keto reductase family 1 member B1 OS=Mus musculus OX=10090 GN=Akr1b1 PE=1 SV=3	34	9	22	9	35.7	Akr1b3	494122	471338	44385	111731	1.31849e+06	1.13436e+06	1.29831e+07	1.27017e+07
High	Master Protein	Q7SIG6	Arf-GAP with SH3 domain, ANK repeat and PH domain-containing protein 2 OS=Mus musculus OX=10090 GN=Asap2 PE=1 SV=3	1	1	22	1	106.7	Asap2	1.16622e+07	4573894	4.82441e+06	2.1544e+06	8.39645e+06	31558840	7388442	22447392
High	Master Protein	Q9QXS6	Drebrin OS=Mus musculus OX=10090 GN=Dbn1 PE=1 SV=4	20	12	22	12	77.2	Dbn1	182671	92161.4	199501	16868.4	101792	434934	1.5952e+07	6.35719e+06
High	Master Protein	P46935	E3 ubiquitin-protein ligase NEDD4 OS=Mus musculus OX=10090 GN=Nedd4 PE=1 SV=3	16	11	22	11	102.6	Nedd4	572495	390963	319731	121438	884409	1.04854e+06	1.23366e+06	187291
High	Master Protein	E9PVA8	eIF-2-alpha kinase activator GCN1 OS=Mus musculus OX=10090 GN=Gcn1 PE=1 SV=1	7	14	22	14	292.8	Gcn1l1	344139	330643	363761	29741.6	255992	797888	2.79341e+06	1.09719e+06
High	Master Protein	P19096	Fatty acid synthase OS=Mus musculus OX=10090 GN=Fasn PE=1 SV=2	7	13	22	13	272.3	Fasn	517725	386737	402488		778294	1.18169e+06	1.73192e+06	1.3005e+06
High	Master Protein	Q6P5B5	Fragile X mental retardation syndrome-related protein 2 OS=Mus musculus OX=10090 GN=Fxr2 PE=1 SV=1	14	6	22	4	74.2	Fxr2	315428	152077	390195		453806	388811	1.09065e+06	696960
High	Master Protein	P01801	Ig heavy chain V-III region J606 OS=Mus musculus OX=10090 PE=1 SV=1	45	5	22	3	12.8	Ighv6-6	1.57577e+06	804977	949507	318651	1.38249e+06	2.44896e+06	1.03306e+06	1.03211e+06
High	Master Protein	A0A140T8P7	Immunoglobulin kappa variable 8-21 (Fragment) OS=Mus musculus OX=10090 GN=Igkv8-21 PE=1 SV=2	33	4	22	1	13.1	Igkv8-21	466445	258596	115040		623949	722895
High	Master Protein	A0A075B5N3	Immunoglobulin kappa variable 8-28 OS=Mus musculus OX=10090 GN=Igkv8-28 PE=1 SV=7	46	4	22	2	10.9		853954	408932	151662	99857.7	917035	967036		61608.3
High	Master Protein	Q8BIJ6	Isoleucine--tRNA ligase, mitochondrial OS=Mus musculus OX=10090 GN=Iars2 PE=1 SV=1	14	10	22	10	112.7	Iars2	41854.3	53923.3	79351.4		18430	73477.7	5.43065e+06	3.32825e+06
High	Master Protein	P45952	Medium-chain specific acyl-CoA dehydrogenase, mitochondrial OS=Mus musculus OX=10090 GN=Acadm PE=1 SV=1	27	11	22	11	46.5	Acadm	257927	116604	51919.8	69417.5	566159	725616	1.10889e+07	1.62196e+07
High	Master Protein	Q791V5	Mitochondrial carrier homolog 2 OS=Mus musculus OX=10090 GN=Mtch2 PE=1 SV=1	28	5	22	5	33.5	Mtch2	297692	26768.1	20335	79030.9	102592	459250	467214	583569
High	Master Protein	Q9CZ44	NSFL1 cofactor p47 OS=Mus musculus OX=10090 GN=Nsfl1c PE=1 SV=1	39	11	22	11	40.7	Nsfl1c	110644	104662		22076.9	273873	435984	1.19834e+07	4.33105e+06
High	Master Protein	P99029	Peroxiredoxin-5, mitochondrial OS=Mus musculus OX=10090 GN=Prdx5 PE=1 SV=2	40	8	22	8	21.9	Prdx5	149264	79813	23925.5	63677.8	167704	660758	6.42824e+06	5633306
High	Master Protein	Q6GT24	Peroxiredoxin-6 OS=Mus musculus OX=10090 GN=Prdx6 PE=1 SV=1	53	9	22	9	24.8	Prdx6	187716	53838.4	53097.4	406290	300363	433994	3.75756e+06	2.34738e+06
High	Master Protein	Q9D662	Protein transport protein Sec23B OS=Mus musculus OX=10090 GN=Sec23b PE=1 SV=1	14	9	22	6	86.4	Sec23b			23726.4	58004.8		10452	3.09236e+06	1.17047e+06
High	Master Protein	Q3UHX9	Putative methyltransferase C9orf114 homolog OS=Mus musculus OX=10090 GN=Spout1 PE=1 SV=1	23	6	22	6	42.9	D2Wsu81e; Spout1	872441	419652	490487	392273	883957	708388	195252
High	Master Protein	Q9D051	Pyruvate dehydrogenase E1 component subunit beta, mitochondrial OS=Mus musculus OX=10090 GN=Pdhb PE=1 SV=1	33	9	22	9	38.9	Pdhb	77734.6	71232.9	8893.56	595511	384203	493590	7.23366e+06	8.5886e+06
High	Master Protein	Q497W9	RNA helicase OS=Mus musculus OX=10090 GN=Dhx15 PE=1 SV=1	14	9	22	9	79.9	Dhx15	650682	841850	993557		1.36106e+06	626067	1.10392e+06	195562
High	Master Protein	Q02614	SAP30-binding protein OS=Mus musculus OX=10090 GN=Sap30bp PE=1 SV=2	33	10	22	10	33.8	Sap30bp	1.9224e+06	686758	917035	306350	2.41864e+06	2.53649e+06	1.6641e+06	1.01481e+06
High	Master Protein	Q6NXL1	Sec24-related gene family, member D (S. cerevisiae) OS=Mus musculus OX=10090 GN=Sec24d PE=1 SV=1	11	10	22	10	112.6	Sec24d		49931.7		534885	221744	191434	1.06159e+07	4.35082e+06
High	Master Protein	P53026	60S ribosomal protein L10a OS=Mus musculus OX=10090 GN=Rpl10a PE=1 SV=3	26	7	21	7	24.9	Rpl10a	1.05022e+06	640770	249698	37407.7	1.17207e+06	2.30283e+06	1.23716e+07	1.11359e+07
High	Master Protein	P16460	Argininosuccinate synthase OS=Mus musculus OX=10090 GN=Ass1 PE=1 SV=1	21	9	21	9	46.6	Ass1	2.14325e+06	1.5774e+06	904071		1.72747e+06	1.89148e+06	6.51808e+06	6.63126e+06
High	Master Protein	Q9DAW9	Calponin-3 OS=Mus musculus OX=10090 GN=Cnn3 PE=1 SV=1	29	7	21	6	36.4	Cnn3	1.47996e+06	1.14785e+06	1.13977e+06	64951	3.05128e+06	2.10716e+06	1.6375e+07	1.20315e+07
High	Master Protein	P52825	Carnitine O-palmitoyltransferase 2, mitochondrial OS=Mus musculus OX=10090 GN=Cpt2 PE=1 SV=2	20	11	21	11	73.9	Cpt2	462387	283866	579706		530780	728031	2.49188e+07	1.65792e+07
High	Master Protein	P60766	Cell division control protein 42 homolog OS=Mus musculus OX=10090 GN=Cdc42 PE=1 SV=2	37	5	21	4	21.2	Cdc42	159862	76279.4	19347.5		373502	564616	8.05919e+06	7.32235e+06
High	Master Protein	Q8CG14	Complement C1s-A subcomponent OS=Mus musculus OX=10090 GN=C1sa PE=2 SV=2	10	5	21	5	76.8	C1s; C1s1	1.17676e+06	838385	734320	164753	1.3313e+06	2.72213e+06	3.39756e+07	1.97957e+07
High	Master Protein	Q6P8J7	Creatine kinase S-type, mitochondrial OS=Mus musculus OX=10090 GN=Ckmt2 PE=1 SV=1	32	13	21	12	47.4	Ckmt2	65763	20991.9		135270	36040.5	2413.98	186264	1.22979e+07
High	Master Protein	P39053	Dynamin-1 OS=Mus musculus OX=10090 GN=Dnm1 PE=1 SV=2	21	15	21	9	97.7	Dnm1	40062.5	133694	115566		115547	164651	3.38715e+06	628098
High	Master Protein	Q9DCW4	Electron transfer flavoprotein subunit beta OS=Mus musculus OX=10090 GN=Etfb PE=1 SV=3	35	9	21	9	27.6	Etfb	228577	147442	76394		450829	951562	1.10851e+07	1.28476e+07
High	Master Protein	Q8QZY1	Eukaryotic translation initiation factor 3 subunit L OS=Mus musculus OX=10090 GN=Eif3l PE=1 SV=1	25	12	21	12	66.6	Eif3l	5.97672e+07	1.97806e+07	1.9862e+07	59453.1	3.16594e+07	2.30664e+07	1.26228e+07	4.69139e+06
High	Master Protein	P62827	GTP-binding nuclear protein Ran OS=Mus musculus OX=10090 GN=Ran PE=1 SV=3	45	8	21	8	24.4	LOC100045999; Ran; LOC102641332	1.63276e+06	1.02563e+06	259171	172657	3.25487e+06	2.34519e+06	1.74987e+07	1.09593e+07
High	Master Protein	A0A140T8P2	Immunoglobulin kappa variable 6-20 (Fragment) OS=Mus musculus OX=10090 GN=Igkv6-20 PE=4 SV=2	40	4	21	3	12.6	Igkv6-20	1.41613e+06	913316	345988	750221	1.93471e+06	2.20218e+06	16174.8	148210
High	Master Protein	E9Q5L2	Inter alpha-trypsin inhibitor, heavy chain 4 OS=Mus musculus OX=10090 GN=Itih4 PE=1 SV=1	26	14	21	14	102.8	Itih4	97882.8	170203	165322	106132	221588	338403	1.0418e+07	4.95033e+06
High	Master Protein	P28665	Murinoglobulin-1 OS=Mus musculus OX=10090 GN=Mug1 PE=1 SV=3	12	12	21	12	165.2	Mug1	617585	119555	251097	93084.2	387003	896896	5.99859e+06	4.30633e+06
High	Master Protein	Q9CPT5	Nucleolar protein 16 OS=Mus musculus OX=10090 GN=Nop16 PE=1 SV=1	53	10	21	10	21.1	Nop16	916644	487172	160946	178452	1.11373e+06	1.38019e+06	769997	75133
High	Master Protein	E9PVD3	Protocadherin-16 OS=Mus musculus OX=10090 GN=Dchs1 PE=1 SV=1	7	13	21	13	346.2	Dchs1			20036.8		89001.4	20535.9	7.4158e+06	2.22465e+06
High	Master Protein	P13439	Uridine 5'-monophosphate synthase OS=Mus musculus OX=10090 GN=Umps PE=1 SV=3	20	7	21	7	52.3	Umps	306204	186470	217225	3186.07	389357	508197	1.92764e+06	831102
High	Master Protein	P62900	60S ribosomal protein L31 OS=Mus musculus OX=10090 GN=Rpl31 PE=1 SV=1	40	6	20	6	14.5	Rpl31	3.37281e+06	1.54256e+06	913180	408924	4070271	4.81925e+06	6.87116e+06	4.34541e+06
High	Master Protein	P54822	Adenylosuccinate lyase OS=Mus musculus OX=10090 GN=Adsl PE=1 SV=2	24	8	20	8	54.8	Adsl	366483	268983	287398	148073	410938	673064	8.69168e+06	3.04835e+06
High	Master Protein	O35841	Apoptosis inhibitor 5 OS=Mus musculus OX=10090 GN=Api5 PE=1 SV=2	30	14	20	14	56.8	Api5	178956	1.41796e+06	82613.8		751056	461427	1.68181e+07	3.21581e+06
High	Master Protein	Q922B2	Aspartate--tRNA ligase, cytoplasmic OS=Mus musculus OX=10090 GN=Dars1 PE=1 SV=2	27	12	20	12	57.1	Dars	698092	505092	563922		1.03052e+06	1.95242e+06	1.87434e+07	8.82319e+06
High	Master Protein	P18242	Cathepsin D OS=Mus musculus OX=10090 GN=Ctsd PE=1 SV=1	30	9	20	9	44.9	Ctsd	388830	190992	200052	216735	586994	645921	1.31032e+07	9.82999e+06
High	Master Protein	Q8VHY0	Chondroitin sulfate proteoglycan 4 OS=Mus musculus OX=10090 GN=Cspg4 PE=1 SV=3	10	15	20	15	252.2	Cspg4	176391	97432.3	105362	135506	489092	257468	6405149	5.27959e+06
High	Master Protein	Q8CIE6	Coatomer subunit alpha OS=Mus musculus OX=10090 GN=Copa PE=1 SV=2	12	12	20	12	138.3	Copa	364890	2.30557e+06	335147	146089	1.78496e+06	817620	3.671e+06	2.30566e+06
High	Master Protein	O55029	Coatomer subunit beta' OS=Mus musculus OX=10090 GN=Copb2 PE=1 SV=2	11	8	20	8	102.4	Copb2	821456	465211	560653		475896	1.05482e+06	5.33869e+06	2.18967e+06
High	Master Protein	Q9CPY7	Cytosol aminopeptidase OS=Mus musculus OX=10090 GN=Lap3 PE=1 SV=3	32	11	20	11	56.1	Lap3	343788	138972	233479	9769.7	586590	578540	1.08776e+07	6.05758e+06
High	Master Protein	Q9DCH4	Eukaryotic translation initiation factor 3 subunit F OS=Mus musculus OX=10090 GN=Eif3f PE=1 SV=2	30	8	20	8	38	Eif3f	284586	107467	205404	102956	183509	585724	1.01736e+07	4.37971e+06
High	Master Protein	P62874	Guanine nucleotide-binding protein G(I)/G(S)/G(T) subunit beta-1 OS=Mus musculus OX=10090 GN=Gnb1 PE=1 SV=3	30	9	20	3	37.4	Gnb1	440324	223574	122800		598963	1.54382e+06	2.45348e+07	2.11205e+07
High	Master Protein	P62880	Guanine nucleotide-binding protein G(I)/G(S)/G(T) subunit beta-2 OS=Mus musculus OX=10090 GN=Gnb2 PE=1 SV=3	31	8	20	2	37.3	Gnb2	53572.4	30515.6			57747.3	101934	1.71548e+06	2.43389e+06
High	Master Protein	P01819	Ig heavy chain V region MOPC 141 OS=Mus musculus OX=10090 PE=4 SV=1	35	3	20	2	15.7		5.64881e+06	5.05744e+06	4.21784e+06	1.17932e+06	7.73536e+06	7.88612e+06	561179	537733
High	Master Protein	A0A075B5Q2	Immunoglobulin heavy variable 5-9 (Fragment) OS=Mus musculus OX=10090 GN=Ighv5-9 PE=4 SV=1	19	2	20	1	12.8	LOC674130	701354	311907	389581	291103	626552	770312	166856	21524.2
High	Master Protein	Q8BFW7	Lipoma-preferred partner homolog OS=Mus musculus OX=10090 GN=Lpp PE=1 SV=1	26	8	20	8	65.8	Lpp	110508	49786.5	58437.3	26583	155840	304212	1.18483e+07	4.03145e+06
High	Master Protein	G3UX26	Outer mitochondrial membrane protein porin 2 OS=Mus musculus OX=10090 GN=Vdac2 PE=1 SV=1	36	8	20	8	30.4		454151	120223	92338.6	33252.7	426932	1.02571e+06	1.92187e+07	1.88294e+07
High	Master Protein	A0A2I3BRL8	Predicted gene 7324 OS=Mus musculus OX=10090 GN=Gm7324 PE=4 SV=1	23	9	20	2	42.2		435575	93789.3	25786	99599.2	429032	568394	6.89095e+07	4.31838e+07
High	Master Protein	Q9WV91	Prostaglandin F2 receptor negative regulator OS=Mus musculus OX=10090 GN=Ptgfrn PE=1 SV=2	15	12	20	12	98.7	Ptgfrn	47550.3	590655	418150	138074	191709	826241	2.07768e+07	9.56589e+06
High	Master Protein	P46638	Ras-related protein Rab-11B OS=Mus musculus OX=10090 GN=Rab11b PE=1 SV=3	49	10	20	10	24.5	Rab11b	632539	335059	99527.4	62746.1	743417	1.54524e+06	2.41867e+07	2.1368e+07
High	Master Protein	Q8CIN4	Serine/threonine-protein kinase PAK 2 OS=Mus musculus OX=10090 GN=Pak2 PE=1 SV=1	21	10	20	6	57.9	Pak2	213200	54017.8		77064.6	271278	519767	9.73235e+06	3.46287e+06
High	Master Protein	Q9R0P3	S-formylglutathione hydrolase OS=Mus musculus OX=10090 GN=Esd PE=1 SV=1	32	6	20	6	31.3	Esd	127239	112105	91680.3		553696	509942	4.78801e+06	4.27679e+06
High	Master Protein	Q9D883	Splicing factor U2AF 35 kDa subunit OS=Mus musculus OX=10090 GN=U2af1 PE=1 SV=4	30	7	20	7	27.8	U2af1	2.32346e+06	1.86812e+06	847696	885905	4.18397e+06	3.69817e+06	500715	1.45111e+06
High	Master Protein	A0A0R4IZY0	Thimet oligopeptidase OS=Mus musculus OX=10090 GN=Thop1 PE=1 SV=1	19	10	20	10	78	Thop1	70031.3	36246.7	24695.8	8360.43	190746	493187	1.5369e+07	5.10341e+06
High	Master Protein	Q9Z1T2	Thrombospondin-4 OS=Mus musculus OX=10090 GN=Thbs4 PE=1 SV=1	6	5	20	4	106.3	Thbs4	112599	28841.5	72839.8		76366.4	490472	2.14239e+07	8.05217e+06
High	Master Protein	Q9DBP5	UMP-CMP kinase OS=Mus musculus OX=10090 GN=Cmpk1 PE=1 SV=1	58	10	20	10	22.2	Cmpk1	67665.3	30564.4		42906.9	86760.8	384476	4.50065e+06	4.33922e+06
High	Master Protein	Q99KC8	von Willebrand factor A domain-containing protein 5A OS=Mus musculus OX=10090 GN=Vwa5a PE=1 SV=2	21	13	20	13	87.1	Vwa5a	35700.3	47376.6	53203.6		388033	433925	1.30541e+07	4.54861e+06
High	Master Protein	P62889	60S ribosomal protein L30 OS=Mus musculus OX=10090 GN=Rpl30 PE=1 SV=2	37	3	19	3	12.8	Rpl30; Rpl30-ps8; Gm12191	687122	353674	178487	305371	1.31322e+06	1.1461e+06	534992	3.5326e+06
High	Master Protein	Q9JII6	Aldo-keto reductase family 1 member A1 OS=Mus musculus OX=10090 GN=Akr1a1 PE=1 SV=3	32	9	19	9	36.6	Akr1a1	332509	301298	196483	104392	550959	680283	11269642	8.46804e+06
High	Master Protein	Q61247	Alpha-2-antiplasmin OS=Mus musculus OX=10090 GN=Serpinf2 PE=1 SV=1	18	7	19	7	54.9	Serpinf2	62399.5	93349.4	66343.1		12340.7	272996	9.58211e+06	4.75942e+06
High	Master Protein	Q9DBF1	Alpha-aminoadipic semialdehyde dehydrogenase OS=Mus musculus OX=10090 GN=Aldh7a1 PE=1 SV=4	30	11	19	11	58.8	Aldh7a1	23359.9	34305.3	8927.52	6097.91	93386.3	157379	8.15664e+06	3.77328e+06
High	Master Protein	P23780	Beta-galactosidase OS=Mus musculus OX=10090 GN=Glb1 PE=1 SV=1	19	10	19	10	73.1	Glb1	78407.9		36992		88709.7	190288	8.48405e+06	3.57088e+06
High	Master Protein	P0DP27	Calmodulin-2 OS=Mus musculus OX=10090 GN=Calm2 PE=1 SV=1	40	5	19	5	16.8	Calm3; Calm1; Calm2	23389.2	34885.8	42553.2		76195.9	534367	3.0474e+06	3.14482e+06
High	Master Protein	Q60865	Caprin-1 OS=Mus musculus OX=10090 GN=Caprin1 PE=1 SV=2	13	8	19	8	78.1	Caprin1	289193	14421.3	273811	437947	466704	805450	9.22072e+06	3.21007e+06
High	Master Protein	Q8K4Q8	Collectin-12 OS=Mus musculus OX=10090 GN=Colec12 PE=1 SV=1	15	10	19	10	81.3	Colec12	92332.2	21567.7	72210.4	77296.4	59581.8	170564	1.18286e+07	5.42171e+06
High	Master Protein	P04186	Complement factor B OS=Mus musculus OX=10090 GN=Cfb PE=1 SV=2	21	13	19	13	85	Cfb	160669	138731	253345	25756.1	139138	649268	2.58768e+07	1.45441e+07
High	Master Protein	P29391	Ferritin light chain 1 OS=Mus musculus OX=10090 GN=Ftl1 PE=1 SV=2	57	9	19	9	20.8	Ftl1	141876	41039.6	190218	344281	93323.6	1.34902e+06	2.54196e+07	2.59855e+06
High	Master Protein	P16110	Galectin-3 OS=Mus musculus OX=10090 GN=Lgals3 PE=1 SV=3	25	6	19	6	27.5	Lgals3	151578	50175.4	20564.6	49715.9	259324	1.03702e+06	7.21114e+06	4.97207e+06
High	Master Protein	Q9WTP7	GTP:AMP phosphotransferase AK3, mitochondrial OS=Mus musculus OX=10090 GN=Ak3 PE=1 SV=3	59	11	19	11	25.4	Ak3	40068	34638.9	17231.6	40995.5	150029	239328	5.87379e+06	5.43138e+06
High	Master Protein	P63094	Guanine nucleotide-binding protein G(s) subunit alpha isoforms short OS=Mus musculus OX=10090 GN=Gnas PE=1 SV=1	27	8	19	7	45.6	Gnas	261073	189496	143428	32009.1	196892	459553	5.81798e+06	3.52888e+06
High	Master Protein	P48722	Heat shock 70 kDa protein 4L OS=Mus musculus OX=10090 GN=Hspa4l PE=1 SV=2	19	12	19	10	94.3	Hspa4l	123034	46770.5	38544.9		227871	373992	3.14078e+06	1.59759e+06
High	Master Protein	P52293	Importin subunit alpha-1 OS=Mus musculus OX=10090 GN=Kpna2 PE=1 SV=2	22	7	19	7	57.9	Kpna2	436874	476556	369216	13172	494767	526403	741633	60883.6
High	Master Protein	F8WJ05	Inter-alpha-trypsin inhibitor heavy chain H1 OS=Mus musculus OX=10090 GN=Itih1 PE=1 SV=1	26	12	19	12	101.6	Itih1	114917	98657	25286.2	10210.3	74114	141724	5.0653e+06	4.03722e+06
High	Master Protein	F7ACR9	Microtubule-actin cross-linking factor 1 (Fragment) OS=Mus musculus OX=10090 GN=Macf1 PE=1 SV=1	4	16	19	1	607.9	D830031N03Rik; Macf1		17657.2	17457.8		9233149		425480	146278
High	Master Protein	Q9DCT2	NADH dehydrogenase [ubiquinone] iron-sulfur protein 3, mitochondrial OS=Mus musculus OX=10090 GN=Ndufs3 PE=1 SV=2	40	10	19	10	30.1	Ndufs3	24324.9	7820.27	90188.3	66447.4	96593.4	225191	3.28634e+06	4.47287e+06
High	Master Protein	Q9R1P4	Proteasome subunit alpha type-1 OS=Mus musculus OX=10090 GN=Psma1 PE=1 SV=1	41	8	19	8	29.5	Psma1	348291	378008	108018	13347.9	652531	920974	8.15825e+06	5.56646e+06
High	Master Protein	Q9JLF6	Protein-glutamine gamma-glutamyltransferase K OS=Mus musculus OX=10090 GN=Tgm1 PE=1 SV=2	14	10	19	10	89.8	Tgm1	327405	68305	70503	8866.21	138505	712995	9.89114e+06	7.09549e+06
High	Master Protein	P28301	Protein-lysine 6-oxidase OS=Mus musculus OX=10090 GN=Lox PE=1 SV=1	25	7	19	7	46.7	Lox	626671	323451	550711		402126	517611	2.17061e+06	4.0861e+06
High	Master Protein	Q922Q4	Pyrroline-5-carboxylate reductase 2 OS=Mus musculus OX=10090 GN=Pycr2 PE=1 SV=1	24	6	19	4	33.6	Pycr2	135299	142425			181638	276915	1.31069e+06	1.35765e+06
High	Master Protein	Q3TU36	RAP1, GTP-GDP dissociation stimulator 1 OS=Mus musculus OX=10090 GN=Rap1gds1 PE=1 SV=1	25	11	19	11	66	Rap1gds1	285009	105791	239944	107698	431824	536969	1.24449e+07	3.61741e+06
High	Master Protein	Q5FWK3	Rho GTPase-activating protein 1 OS=Mus musculus OX=10090 GN=Arhgap1 PE=1 SV=1	28	10	19	10	50.4	Arhgap1	138481	76924	106374		153134	444157	1.55581e+07	5.10513e+06
High	Master Protein	Q9WV02	RNA-binding motif protein, X chromosome OS=Mus musculus OX=10090 GN=Rbmx PE=1 SV=1	21	8	19	1	42.3	Rbmx							50417.2	57614.8
High	Master Protein	Q8BRF7	Sec1 family domain-containing protein 1 OS=Mus musculus OX=10090 GN=Scfd1 PE=1 SV=1	31	14	19	14	72.3	Scfd1	70586.4	52725.4	70904.7	61140.8	39159.3	284020	8.67565e+06	2.7694e+06
High	Master Protein	Q99JR1	Sideroflexin-1 OS=Mus musculus OX=10090 GN=Sfxn1 PE=1 SV=3	36	8	19	6	35.6	Sfxn1	1.365e+06	1.29488e+06	477639		675270	883169	1.5467e+06	1.54903e+06
High	Master Protein	Q9Z2I9	Succinate--CoA ligase [ADP-forming] subunit beta, mitochondrial OS=Mus musculus OX=10090 GN=Sucla2 PE=1 SV=2	38	14	19	14	50.1	Sucla2	381603	194874	74245.3	23378.8	567187	1.22358e+06	1.47981e+07	1.43741e+07
High	Master Protein	Q9D8W5	26S proteasome non-ATPase regulatory subunit 12 OS=Mus musculus OX=10090 GN=Psmd12 PE=1 SV=4	18	7	18	7	52.9	Psmd12	179518	226726	203960	11863.4	447966	416582	6.22107e+06	1.81391e+06
High	Master Protein	P62918	60S ribosomal protein L8 OS=Mus musculus OX=10090 GN=Rpl8 PE=1 SV=2	25	8	18	8	28	Rpl8	1.76502e+06	974771	400483	3497.52	3.04537e+06	2.74415e+06	8.02477e+06	4.41209e+06
High	Master Protein	Q99LE6	ATP-binding cassette sub-family F member 2 OS=Mus musculus OX=10090 GN=Abcf2 PE=1 SV=1	19	10	18	10	71.7	Abcf2	462025	580059	886175	196211	1.25507e+06	1.53476e+06	1.19321e+06	597045
High	Master Protein	P08121	Collagen alpha-1(III) chain OS=Mus musculus OX=10090 GN=Col3a1 PE=1 SV=4	9	9	18	9	138.9	Col3a1	93822.2	20294	21639.2	206838	115309	1.85555e+06	9.59448e+07	7.94788e+07
High	Master Protein	P06909	Complement factor H OS=Mus musculus OX=10090 GN=Cfh PE=1 SV=2	9	10	18	8	139	Cfh	178120	186157	87346		164140	659000	2.61518e+07	1.30896e+07
High	Master Protein	P62897	Cytochrome c, somatic OS=Mus musculus OX=10090 GN=Cycs PE=1 SV=2	57	8	18	8	11.6	Cycs; Gm10053	38086	68158.4	53272.8	12669.5	114313	482935	4.80237e+06	6.29817e+06
High	Master Protein	Q62418	Drebrin-like protein OS=Mus musculus OX=10090 GN=Dbnl PE=1 SV=2	31	10	18	10	48.7	Dbnl	965188	33193.4	199300	57413.9	871578	1.30819e+06	1.40893e+07	3.97568e+06
High	Master Protein	A2AMW0	F-actin-capping protein subunit beta OS=Mus musculus OX=10090 GN=Capzb PE=1 SV=1	51	10	18	2	29.3	Capzb	598807	240742	91281.6	242523	472238	974772	1.38045e+07	1.1062e+07
High	Master Protein	Q920E5	Farnesyl pyrophosphate synthase OS=Mus musculus OX=10090 GN=Fdps PE=1 SV=1	20	5	18	5	40.6	Fdps	227296	152435	29645.6	47452	667842	437986	873867	386471
High	Master Protein	Q3TDN2	FAS-associated factor 2 OS=Mus musculus OX=10090 GN=Faf2 PE=1 SV=2	21	7	18	7	52.4	Faf2	504827	172881	423313	32355	563327	836751	1.11339e+07	4.33468e+06
High	Master Protein	A0A1Y7VJW9	Fibulin-5 OS=Mus musculus OX=10090 GN=Fbln5 PE=1 SV=1	13	5	18	5	51.7	Fbln5	135294	103880	164268	62436.5	151438	469956	1.18356e+07	5.46229e+06
High	Master Protein	P08752	Guanine nucleotide-binding protein G(i) subunit alpha-2 OS=Mus musculus OX=10090 GN=Gnai2 PE=1 SV=5	36	9	18	6	40.5	Gnai2	526361	331537	248632		498384	523281	9.99725e+06	8.17267e+06
High	Master Protein	Q9ERG0	LIM domain and actin-binding protein 1 OS=Mus musculus OX=10090 GN=Lima1 PE=1 SV=3	20	12	18	12	84	Lima1	686859	179951	307065	12709.7	36600.3	315609	1.47125e+07	3.72009e+06
High	Master Protein	P57748	Matrix metalloproteinase-20 OS=Mus musculus OX=10090 GN=Mmp20 PE=2 SV=1	26	11	18	11	54.3	Mmp20	47159.1	94471.2	96291.4	98379.4	70031.2	260885	1.25521e+07	9.09688e+06
High	Master Protein	Q9EQ20	Methylmalonate-semialdehyde dehydrogenase [acylating], mitochondrial OS=Mus musculus OX=10090 GN=Aldh6a1 PE=1 SV=1	24	9	18	9	57.9	Aldh6a1	28984.3	792611	290157	135381	1.75528e+06	239233	1.23587e+07	8.08931e+06
High	Master Protein	P97457	Myosin regulatory light chain 2, skeletal muscle isoform OS=Mus musculus OX=10090 GN=Mylpf PE=1 SV=3	69	10	18	10	18.9	Mylpf	833856	121783	163524	12473	341166	429095	463678	2.38788e+07
High	Master Protein	Q99MN9	Propionyl-CoA carboxylase beta chain, mitochondrial OS=Mus musculus OX=10090 GN=Pccb PE=1 SV=2	29	10	18	10	58.4	Pccb	24868.1	66424.4	37735	74491.4	8041.53	239052	6.13853e+06	4.27797e+06
High	Master Protein	Q9D945	Protein LLP homolog OS=Mus musculus OX=10090 GN=Llph PE=1 SV=1	29	2	18	2	15.4	Llph	284175	11123	47831.5	72685.1	363479	530429	297001	95355.1
High	Master Protein	Q9D281	Protein Noxp20 OS=Mus musculus OX=10090 GN=Fam114a1 PE=1 SV=1	25	11	18	11	61	Fam114a1	80155.2	71045.5	124638	160983	84276.8	305577	2.08053e+07	1.08409e+07
Medium	Master Protein	Q9QYX7	Protein piccolo OS=Mus musculus OX=10090 GN=Pclo PE=1 SV=4	0	1	18	1	550.5	Pclo	4.67308e+06	1.07739e+06	9.36676e+06		3.06834e+06	3.79037e+06	384370	368861
High	Master Protein	Q5SUT0	RNA-binding protein EWS OS=Mus musculus OX=10090 GN=Ewsr1 PE=1 SV=1	14	5	18	5	64.9	Ewsr1	215033	128086	137877		310044	957813	1.46105e+07	6.83882e+06
High	Master Protein	Q3THS6	S-adenosylmethionine synthase isoform type-2 OS=Mus musculus OX=10090 GN=Mat2a PE=1 SV=2	19	7	18	7	43.7	Mat2a	367998	159671	221688	660575	144256	549626	8.01166e+06	2991664
High	Master Protein	Q93092	Transaldolase OS=Mus musculus OX=10090 GN=Taldo1 PE=1 SV=2	31	11	18	11	37.4	Taldo1	402065	202328	98675.2	4592.39	831883	999879	1.64745e+07	9.77064e+06
High	Master Protein	P54728	UV excision repair protein RAD23 homolog B OS=Mus musculus OX=10090 GN=Rad23b PE=1 SV=2	19	7	18	7	43.5	Rad23b	246847	216297	34658.1	45834	258205	334071	1.20076e+07	2.81037e+06
High	Master Protein	Q9QWR8	Alpha-N-acetylgalactosaminidase OS=Mus musculus OX=10090 GN=Naga PE=1 SV=2	19	8	17	8	47.2	Naga		19625.1	24890.3		482163	69274.5	1.02109e+07	7.20296e+06
High	Master Protein	Q01339	Beta-2-glycoprotein 1 OS=Mus musculus OX=10090 GN=Apoh PE=1 SV=1	27	7	17	7	38.6	Apoh	65884.2	20387.2	25879		91850.4	60382.3	8.03231e+06	5.36595e+06
High	Master Protein	P29416	Beta-hexosaminidase subunit alpha OS=Mus musculus OX=10090 GN=Hexa PE=1 SV=2	15	7	17	7	60.6	Hexa	96196.3	75964.6	114144		108138	360659	1.22279e+07	4.82738e+06
High	Master Protein	Q9DBC7	cAMP-dependent protein kinase type I-alpha regulatory subunit OS=Mus musculus OX=10090 GN=Prkar1a PE=1 SV=3	25	9	17	9	43.2	Prkar1a	737283	275270	241785	64523.4	216484	369795	7.05395e+06	3.78345e+06
High	Master Protein	Q6ZQ06	Centrosomal protein of 162 kDa OS=Mus musculus OX=10090 GN=Cep162 PE=1 SV=2	1	1	17	1	160.8	4922501C03Rik; Cep162	3.44442e+06	585931	2.45804e+06		2.67303e+06	2.64595e+06	685822	576352
High	Master Protein	O88207	Collagen alpha-1(V) chain OS=Mus musculus OX=10090 GN=Col5a1 PE=1 SV=2	8	9	17	8	183.6	Col5a1	155242	217910	315044		12368	231108	1.42384e+07	5.45344e+06
High	Master Protein	P19783	Cytochrome c oxidase subunit 4 isoform 1, mitochondrial OS=Mus musculus OX=10090 GN=Cox4i1 PE=1 SV=2	42	6	17	6	19.5	Cox4i1	160788	173570	176232	7064.03	143831	714692	8.31692e+06	1.42974e+07
High	Master Protein	P31428	Dipeptidase 1 OS=Mus musculus OX=10090 GN=Dpep1 PE=1 SV=2	22	7	17	7	45.7	Dpep1	149216	100254	34610.4		105848	314500	1.13641e+07	6.09399e+06
High	Master Protein	Q8BFW6	Ectonucleoside triphosphate diphosphohydrolase 3 OS=Mus musculus OX=10090 GN=Entpd3 PE=1 SV=1	20	10	17	10	58.9	Entpd3	73676.5	39333.1	13648.7	27295.4	55432.9	57577.8	1.30993e+07	7.0922e+06
High	Master Protein	A0A2I3BRT4	Epiplakin OS=Mus musculus OX=10090 GN=Eppk1 PE=1 SV=1	4	4	17	1	381.5								87508.8	6569538
High	Master Protein	Q9Z0N1	Eukaryotic translation initiation factor 2 subunit 3, X-linked OS=Mus musculus OX=10090 GN=Eif2s3x PE=1 SV=2	24	8	17	8	51	Eif2s3x	1.08241e+06	539554	834013		1.22148e+06	1.24341e+06	4.06221e+06	1.00775e+06
High	Master Protein	P47757	F-actin-capping protein subunit beta OS=Mus musculus OX=10090 GN=Capzb PE=1 SV=3	47	9	17	1	31.3	Capzb							77361.6	124815
High	Master Protein	Q6PD26	GPI transamidase component PIG-S OS=Mus musculus OX=10090 GN=Pigs PE=1 SV=3	15	6	17	6	61.7	Pigs	159866	57392.1	128730	74959.2	75016	169001	3.08846e+06	1.41181e+06
High	Master Protein	Q9CX86	Heterogeneous nuclear ribonucleoprotein A0 OS=Mus musculus OX=10090 GN=Hnrnpa0 PE=1 SV=1	30	6	17	6	30.5	Hnrnpa0	102317	45511.9	74203.3	35814.1	144759	244228	8.97985e+06	7.84265e+06
High	Master Protein	Q6GU68	Immunoglobulin superfamily containing leucine-rich repeat protein OS=Mus musculus OX=10090 GN=Islr PE=1 SV=1	19	7	17	7	45.6	Islr	10495.1			23255		134811	8.28757e+06	5.11969e+06
High	Master Protein	Q91VA7	Isocitrate dehydrogenase [NAD] subunit, mitochondrial OS=Mus musculus OX=10090 GN=Idh3b PE=1 SV=1	31	8	17	8	42.2	Idh3b	499216	335554	71866.1		852912	748470	4.99088e+06	8.73961e+06
High	Master Protein	A0A087WS29	Kinectin OS=Mus musculus OX=10090 GN=Ktn1 PE=1 SV=1	13	14	17	14	140.8	Ktn1	190904	78769.3	71487.6		292674	341387	1.07597e+07	3.56955e+06
High	Master Protein	P51174	Long-chain specific acyl-CoA dehydrogenase, mitochondrial OS=Mus musculus OX=10090 GN=Acadl PE=1 SV=2	27	11	17	11	47.9	Acadl	280929	236878	133832	34442	305072	786005	8.6212e+06	1.16664e+07
High	Master Protein	Q9EQK5	Major vault protein OS=Mus musculus OX=10090 GN=Mvp PE=1 SV=4	23	14	17	14	95.9	Mvp	258656	237202	224754	24135.9	580055	681357	1.05074e+07	2.71043e+06
High	Master Protein	G5E898	Periplakin OS=Mus musculus OX=10090 GN=Ppl PE=1 SV=1	10	17	17	17	203.7	Ppl	306154	122675	93615.8	34049.9	315874	267828	1.11334e+07	1.04147e+06
High	Master Protein	P54823	Probable ATP-dependent RNA helicase DDX6 OS=Mus musculus OX=10090 GN=Ddx6 PE=1 SV=1	25	8	17	8	54.2	Ddx6	393408	273567	234532		149041	504101	3.21887e+06	1.17217e+06
High	Master Protein	Q921X9	Protein disulfide-isomerase A5 OS=Mus musculus OX=10090 GN=Pdia5 PE=1 SV=1	22	8	17	8	59.2	Pdia5	54942.2	13370.6	43016.6		54419.3	190609	7.25397e+06	2.18263e+06
High	Master Protein	P61620	Protein transport protein Sec61 subunit alpha isoform 1 OS=Mus musculus OX=10090 GN=Sec61a1 PE=1 SV=2	17	6	17	6	52.2	Sec61a1	751762	605793	99539.6	4477.84	1.72902e+06	1.64152e+06	3.21552e+06	2.61855e+06
High	Master Protein	Q922W5	Pyrroline-5-carboxylate reductase 1, mitochondrial OS=Mus musculus OX=10090 GN=Pycr1 PE=1 SV=1	34	8	17	6	32.4	Pycr1	406510	171330	144126	108039	428145	493248	4980910	6.33715e+06
High	Master Protein	Q9D1G1	Ras-related protein Rab-1B OS=Mus musculus OX=10090 GN=Rab1b PE=1 SV=1	61	10	17	4	22.2	Rab1b	75132.3	37327.9	11975.6	96067.6	138992	202568	2.41741e+06	2.83543e+06
High	Master Protein	Q8BGH2	Sorting and assembly machinery component 50 homolog OS=Mus musculus OX=10090 GN=Samm50 PE=1 SV=1	20	8	17	8	51.8	Samm50	331361	261142	424968		345461	673963	1.50764e+07	1.11221e+07
High	Master Protein	E9Q4Q2	Splicing factor 1 OS=Mus musculus OX=10090 GN=Sf1 PE=1 SV=1	26	9	17	9	59.7	Sf1	565774	491020	296594	76388.5	914989	712610	1.18369e+07	3.9093e+06
High	Master Protein	Q6AXB7	Synaptic functional regulator FMR1 OS=Mus musculus OX=10090 GN=Fmr1 PE=1 SV=1	7	4	17	3	68.8	Fmr1	442234	149778	339328		383394	215307	957074
High	Master Protein	Q9DBS1	Transmembrane protein 43 OS=Mus musculus OX=10090 GN=Tmem43 PE=1 SV=1	40	10	17	10	44.8	Tmem43				10117.9		226566	5.13338e+06	5.16072e+06
High	Master Protein	Q8BVE3	V-type proton ATPase subunit H OS=Mus musculus OX=10090 GN=Atp6v1h PE=1 SV=1	17	7	17	7	55.8	Atp6v1h	450032	264723	266622	17641.4	449193	654147	3.06201e+06	321394
High	Master Protein	Q3UE92	Xaa-Pro aminopeptidase 1 OS=Mus musculus OX=10090 GN=Xpnpep1 PE=1 SV=1	20	10	17	10	74.5	Xpnpep1	35028.7	42135.9	24264.1	4416.77	154462	308987	8.43349e+06	3.69148e+06
High	Master Protein	A0A1L1SSF2	ADP-dependent glucokinase OS=Mus musculus OX=10090 GN=Adpgk PE=1 SV=1	27	9	16	9	53.9	Adpgk	100192	98939.6	75578.2	25433.1	131342	447204	8.46152e+06	6.73112e+06
High	Master Protein	P55302	Alpha-2-macroglobulin receptor-associated protein OS=Mus musculus OX=10090 GN=Lrpap1 PE=1 SV=1	25	8	16	8	42.2	Lrpap1	17401.3	62753.3	13663.8	1.51686e+06	134125	310048	7.27385e+06	5.29918e+06
High	Master Protein	Q9CQQ7	ATP synthase F(0) complex subunit B1, mitochondrial OS=Mus musculus OX=10090 GN=Atp5pb PE=1 SV=1	30	8	16	8	28.9	Atp5f1	495608	313874	265869	88602.9	1.04805e+06	2.10026e+06	2.43458e+07	2.48079e+07
High	Master Protein	Q8CE80	Calpain inhibitor OS=Mus musculus OX=10090 GN=Cast PE=1 SV=1	22	9	16	9	81.4	Cast	116393	64196.7	29141		151912	381128	6.73306e+06	2.62029e+06
High	Master Protein	H7BX88	Carnitine O-acetyltransferase OS=Mus musculus OX=10090 GN=Crat PE=1 SV=1	15	8	16	8	68.6		102220	13889.4	259212	40010.4	120039	19628.9	3.7138e+06	4.23942e+06
High	Master Protein	Q9CR68	Cytochrome b-c1 complex subunit Rieske, mitochondrial OS=Mus musculus OX=10090 GN=Uqcrfs1 PE=1 SV=1	43	9	16	9	29.3	Uqcrfs1	226054	137958	34456.9		380587	665462	1.12426e+07	1.0786e+07
High	Master Protein	Q3U9G9	Delta(14)-sterol reductase LBR OS=Mus musculus OX=10090 GN=Lbr PE=1 SV=2	10	5	16	5	71.4	Lbr	679902	538575	512611	138244	826989	1.27238e+06	699868	486151
High	Master Protein	Q9Z110	Delta-1-pyrroline-5-carboxylate synthase OS=Mus musculus OX=10090 GN=Aldh18a1 PE=1 SV=2	20	11	16	11	87.2	Aldh18a1	13403.6	74631.1	528283	60843.1	81286.5	307452	5.4587e+06	2.33244e+06
High	Master Protein	P49718	DNA replication licensing factor MCM5 OS=Mus musculus OX=10090 GN=Mcm5 PE=1 SV=2	7	4	16	4	82.4		405210	762792	585530		421443	402608	325390	109465
High	Master Protein	Q9D1Q6	Endoplasmic reticulum resident protein 44 OS=Mus musculus OX=10090 GN=Erp44 PE=1 SV=1	19	7	16	6	46.8	Erp44	82632.1	175171	80024.9	45965.4	289787	387226	1.2032e+07	6.05143e+06
High	Master Protein	P09528	Ferritin heavy chain OS=Mus musculus OX=10090 GN=Fth1 PE=1 SV=2	44	6	16	6	21.1	Fth1	93127.3	43670.6	48210.1	33127.6	149760	885400	1.83818e+07	4.01415e+06
High	Master Protein	Q8CI94	Glycogen phosphorylase, brain form OS=Mus musculus OX=10090 GN=Pygb PE=1 SV=3	15	12	16	8	96.7	Pygb	308611	64248.1	75454.9	174027	106637	478920	7.99824e+06	2.52733e+06
High	Master Protein	Q3THK7	GMP synthase [glutamine-hydrolyzing] OS=Mus musculus OX=10090 GN=Gmps PE=1 SV=2	17	10	16	10	76.7	Gmps	231804	1.00136e+06	392086	23051.5	159665	287164	6.62539e+06	1.66103e+06
High	Master Protein	Q99JX3	Golgi reassembly-stacking protein 2 OS=Mus musculus OX=10090 GN=Gorasp2 PE=1 SV=3	21	7	16	7	47	Gorasp2	259081	283334	29661.9	40542.5	349170	511004	1.37517e+07	1.23607e+07
High	Master Protein	Q61035	Histidine--tRNA ligase, cytoplasmic OS=Mus musculus OX=10090 GN=Hars1 PE=1 SV=2	21	9	16	8	57.4	Hars	409306	401031	310213	254924	381799	850434	1.32041e+07	4.04601e+06
High	Master Protein	P04940	Ig kappa chain V-VI region NQ2-17.4.1 OS=Mus musculus OX=10090 PE=2 SV=1	15	3	16	2	11.6		6.49158e+06	2.84509e+06	1.45133e+06	892305	8.3179e+06	7.00267e+06
High	Master Protein	A0A075B677	Immunoglobulin kappa variable 4-53 OS=Mus musculus OX=10090 GN=Igkv4-53 PE=1 SV=1	64	3	16	3	10.4		286036	238934	30446.5	433781	251630	543758	257981	658141
High	Master Protein	Q8VCM8	Nicalin OS=Mus musculus OX=10090 GN=Ncln PE=1 SV=2	17	8	16	8	62.9	Ncln	511617	435099	534993		797804	723112	5.11704e+06	2.09187e+06
High	Master Protein	Q8R326	Paraspeckle component 1 OS=Mus musculus OX=10090 GN=Pspc1 PE=1 SV=1	18	7	16	6	58.7	Pspc1	42605.6	10306.7	83662.3	12313030		79746.4	5.83715e+06	2.74503e+06
High	Master Protein	Q9CRA2	PDZ and LIM domain protein 5 OS=Mus musculus OX=10090 GN=Pdlim5 PE=1 SV=1	42	6	16	1	23.8	Pdlim5		4283.97						137454
High	Master Protein	Q6Q477	Plasma membrane calcium-transporting ATPase 4 OS=Mus musculus OX=10090 GN=Atp2b4 PE=1 SV=1	8	7	16	1	133	Atp2b4							332822	190351
High	Master Protein	Q8CG70	Prolyl 3-hydroxylase 3 OS=Mus musculus OX=10090 GN=P3h3 PE=1 SV=1	19	10	16	10	81.7	Leprel2; P3h3	214948	63185	99216.8		147474	128183	1.11081e+07	3.30244e+06
High	Master Protein	O09061	Proteasome subunit beta type-1 OS=Mus musculus OX=10090 GN=Psmb1 PE=1 SV=1	33	6	16	6	26.4	Psmb1	160049	80380.9	90494.2	21489.3	216593	748475	7.70464e+06	7.31288e+06
High	Master Protein	P97855	Ras GTPase-activating protein-binding protein 1 OS=Mus musculus OX=10090 GN=G3bp1 PE=1 SV=1	27	9	16	8	51.8	G3bp1	697110	314326	468694		641975	1.20775e+06	8.35137e+06	2.57765e+06
High	Master Protein	P53994	Ras-related protein Rab-2A OS=Mus musculus OX=10090 GN=Rab2a PE=1 SV=1	48	9	16	9	23.5	Rab2a	82955.7				147955	220899	6.44199e+06	6.20796e+06
High	Master Protein	A0A1B0GR19	Reticulocalbin-3 (Fragment) OS=Mus musculus OX=10090 GN=Rcn3 PE=1 SV=1	42	8	16	8	31.8		134559	190635	108225	649114	177939	343899	8.84394e+06	6.24332e+06
High	Master Protein	Q9D7H3	RNA 3'-terminal phosphate cyclase OS=Mus musculus OX=10090 GN=RtcA PE=1 SV=2	19	5	16	5	39.2	Rtca; Rtcd1	506250	189718			428060	601001	293100	246529
High	Master Protein	Q03350	Thrombospondin-2 OS=Mus musculus OX=10090 GN=Thbs2 PE=1 SV=2	5	4	16	4	129.8	Thbs2	156167	32073	166152	6188.79	124138	308785	2.46064e+06	1.21183e+06
High	Master Protein	P62334	26S proteasome regulatory subunit 10B OS=Mus musculus OX=10090 GN=Psmc6 PE=1 SV=1	31	8	15	8	44.1	Psmc6	177795	186215	154743	139887	221193	308007	4.9869e+06	3.70492e+06
High	Master Protein	Q9CR57	60S ribosomal protein L14 OS=Mus musculus OX=10090 GN=Rpl14 PE=1 SV=3	21	4	15	4	23.5	Rpl14	4.14546e+06	1.29444e+06	6.13696e+06	227229	4.801e+06	5.5676e+06	3.26194e+06	2.63499e+06
High	Master Protein	Q9CZM2	60S ribosomal protein L15 OS=Mus musculus OX=10090 GN=Rpl15 PE=1 SV=4	26	5	15	5	24.1	Rpl15	618720	321548	195722	89757.1	893661	968176	6.33881e+06	2.0519e+06
High	Master Protein	P41105	60S ribosomal protein L28 OS=Mus musculus OX=10090 GN=Rpl28 PE=1 SV=2	33	6	15	6	15.7	Rpl28	1.1983e+06	467610	203740	50858.4	1.91144e+06	1.69849e+06	4.19026e+06	3.45098e+06
High	Master Protein	P47915	60S ribosomal protein L29 OS=Mus musculus OX=10090 GN=Rpl29 PE=1 SV=2	19	3	15	3	17.6	Rpl29; Gm8210	1.40955e+06	598661	582684	709535	2.29123e+06	2.05558e+06	1.61332e+06	624490
High	Master Protein	Q7TT36	Adhesion G protein-coupled receptor A3 OS=Mus musculus OX=10090 GN=Adgra3 PE=2 SV=3	9	10	15	10	144.6	Gpr125; Adgra2; Adgra3	804462	536621	850497	131571	1.11236e+06	1.10356e+06	1.95616e+06	661068
High	Master Protein	P05201	Aspartate aminotransferase, cytoplasmic OS=Mus musculus OX=10090 GN=Got1 PE=1 SV=3	27	9	15	9	46.2	Got1	58872.5	166738	74210.4	25774.1	110694	594791	1.83554e+07	1.03894e+07
High	Master Protein	Q8R016	Bleomycin hydrolase OS=Mus musculus OX=10090 GN=Blmh PE=1 SV=1	25	9	15	9	52.5	Blmh	20231.2	120195	105573	35802.2	58333.9	662575	1.02291e+07	3.55776e+06
High	Master Protein	A0A0J9YU62	C-terminal-binding protein 1 OS=Mus musculus OX=10090 GN=Ctbp1 PE=1 SV=1	23	8	15	7	46.5	Ctbp1	697034	187968	1.10994e+06		644504	1.63927e+06	3.8983e+07	3.15173e+07
High	Master Protein	Q6ZQ73	Cullin-associated NEDD8-dissociated protein 2 OS=Mus musculus OX=10090 GN=Cand2 PE=1 SV=2	9	8	15	8	135.5	Cand2	411806	314759	530322		275938	498968	1.1312e+06	1.30403e+06
High	Master Protein	O35492	Dual specificity protein kinase CLK3 OS=Mus musculus OX=10090 GN=Clk3 PE=1 SV=2	14	7	15	7	73.8	Clk3	648843	406384	383084		727746	1.44029e+06	5.09732e+06	5.56163e+06
High	Master Protein	P70372	ELAV-like protein 1 OS=Mus musculus OX=10090 GN=Elavl1 PE=1 SV=2	25	7	15	7	36.1	Elavl1	303473	179334	48446.2	31922.7	427442	364262	1.02028e+07	8.47502e+06
High	Master Protein	Q8JZQ9	Eukaryotic translation initiation factor 3 subunit B OS=Mus musculus OX=10090 GN=Eif3b PE=1 SV=1	15	9	15	9	91.3	Eif3b	495773	215272	191259	281370	645430	752048	3.53464e+06	455592
High	Master Protein	P47754	F-actin-capping protein subunit alpha-2 OS=Mus musculus OX=10090 GN=Capza2 PE=1 SV=3	29	6	15	5	32.9	Capza2	316818	91277.4	86993.9	43203.1	201319	650591	8.06334e+06	7.6749e+06
High	Master Protein	P19157	Glutathione S-transferase P 1 OS=Mus musculus OX=10090 GN=Gstp1 PE=1 SV=2	35	6	15	6	23.6	Gstp1	128752	1.06094e+06	97933.6	10002.4	2.21153e+06	1.61172e+07	7.16343e+06	5.89951e+06
High	Master Protein	Q9QZF2	Glypican-1 OS=Mus musculus OX=10090 GN=Gpc1 PE=1 SV=1	23	8	15	8	61.3	Gpc1	52367.2	28232.9	34237.9	32991.4	98677.3	148948	7.4455e+06	3.442e+06
High	Master Protein	Q6PGG6	Guanine nucleotide-binding protein-like 3-like protein OS=Mus musculus OX=10090 GN=Gnl3l PE=1 SV=1	12	6	15	6	65.2	Gnl3l	595983	476897	735607		780450	1.01183e+06	892199	342785
High	Master Protein	P01878	Ig alpha chain C region OS=Mus musculus OX=10090 PE=1 SV=1	30	7	15	7	36.9	Igh-VJ558	5.57209e+06	2.84622e+06	4.02517e+06	64745.8	4.14342e+06	8.88735e+06	3.91046e+07	1.69584e+07
High	Master Protein	P01679	Ig kappa chain V-VI region J539 OS=Mus musculus OX=10090 PE=1 SV=1	24	2	15	1	11.5		91923	34881.6		69739	59054.7	135872	36091.1	26136.2
High	Master Protein	A0A075B5T3	Immunoglobulin heavy variable 6-6 (Fragment) OS=Mus musculus OX=10090 GN=Ighv6-6 PE=4 SV=1	50	5	15	3	13.3	LOC677040	347049	313847	213057		657262	589822	3.48649e+06	1.23177e+06
High	Master Protein	A0A075B5T5	Immunoglobulin heavy variable V1-5 OS=Mus musculus OX=10090 GN=Ighv1-5 PE=4 SV=1	19	1	15	1	10.8	LOC671380	2.24231e+06		422373	628126	99970.5	2.15971e+06	26627.9	813419
High	Master Protein	A0A140T8P5	Immunoglobulin kappa chain variable 8-24 (Fragment) OS=Mus musculus OX=10090 GN=Igkv8-24 PE=4 SV=2	36	4	15	2	13.3	Igkv8-24	373263	67992.5	64816.8		260590	395708	87966	49551
High	Master Protein	A0A0B4J1I1	Immunoglobulin kappa variable 16-104 (Fragment) OS=Mus musculus OX=10090 GN=Igkv16-104 PE=4 SV=1	23	2	15	2	12.9	Igkv16-104	344805	73509.2	39837.7	210568	283946	597603	26841.9	13057.7
High	Master Protein	A0A075B5L7	Immunoglobulin kappa variable 4-80 (Fragment) OS=Mus musculus OX=10090 GN=Igkv4-80 PE=4 SV=2	14	1	15	1	12.6	Igkv4-80	401973	90631.2	47680.5	198885	159964	448936	204814	153009
High	Master Protein	A0A0B4J1F0	Integrin alpha-11 OS=Mus musculus OX=10090 GN=Itga11 PE=1 SV=1	9	11	15	11	133	Itga11	21270	16679.2	129788	100664	43219.8	102299	8.81001e+06	6.05638e+06
High	Master Protein	Q6PE70	Integrin beta OS=Mus musculus OX=10090 GN=Itgb5 PE=1 SV=1	15	9	15	9	88	Itgb5	41930.9			1.07989e+06		47922.1	6.15111e+06	3.53046e+06
High	Master Protein	Q505F5	Leucine-rich repeat-containing protein 47 OS=Mus musculus OX=10090 GN=Lrrc47 PE=1 SV=1	27	9	15	9	63.6	Lrrc47	33900	92972.6	28468.9	55113.9	18620.4	26792.1	4.55465e+06	1.49236e+06
High	Master Protein	A0A286YDF5	Myoferlin OS=Mus musculus OX=10090 GN=Myof PE=1 SV=1	7	10	15	10	234.4		515126	518407	459572	12864.9	1.31514e+06	1.14547e+06	4.76001e+06	1.47654e+06
High	Master Protein	O88322	Nidogen-2 OS=Mus musculus OX=10090 GN=Nid2 PE=1 SV=2	10	10	15	9	153.8	Nid2	20458.7	31442.1	17048.4	20026.9	22319.8	156391	5.37282e+06	3.17012e+06
High	Master Protein	Q8BJ71	Nuclear pore complex protein Nup93 OS=Mus musculus OX=10090 GN=Nup93 PE=1 SV=1	14	7	15	7	93.2	Nup93	301075	243375	529640		279555	496815	4.05004e+06	2.10704e+06
High	Master Protein	Q99LX0	Parkinson disease protein 7 homolog OS=Mus musculus OX=10090 GN=Park7 PE=1 SV=1	48	7	15	7	20	Park7	131495	62788.3	101645	58408.4	131125	443636	1.01351e+07	7.71272e+06
High	Master Protein	Q7M6Y3	Phosphatidylinositol-binding clathrin assembly protein OS=Mus musculus OX=10090 GN=Picalm PE=1 SV=1	26	9	15	3	71.5	Picalm	197200	80758.1	95657.8		86119.7	563757	1.14903e+07	3.48435e+06
High	Master Protein	Q9CYR6	Phosphoacetylglucosamine mutase OS=Mus musculus OX=10090 GN=Pgm3 PE=1 SV=1	16	7	15	7	59.4	Pgm3		12364.3	54462.6	13297.5	31455.4	64488.1	11653478	3.82914e+06
High	Master Protein	Q9QUR6	Prolyl endopeptidase OS=Mus musculus OX=10090 GN=Prep PE=1 SV=1	14	8	15	8	80.7	Prep	1.58755e+07	2.62395e+06	4.72251e+06	972418	3.063e+06	9.03649e+06	3.51682e+08	1.8022e+08
High	Master Protein	Q9Z2U0	Proteasome subunit alpha type-7 OS=Mus musculus OX=10090 GN=Psma7 PE=1 SV=1	42	8	15	8	27.8	Psma7	355160	121298	3089.59	119574	494372	605174	7.80729e+06	3.36785e+06
High	Master Protein	Q8BUK6	Protein Hook homolog 3 OS=Mus musculus OX=10090 GN=Hook3 PE=1 SV=2	17	9	15	9	83.2	Hook3	259482	102571	42834.5		164902	240804	6.74481e+06	2.7295e+06
High	Master Protein	A0A0R4J034	Pyridoxal-dependent decarboxylase domain-containing protein 1 OS=Mus musculus OX=10090 GN=Pdxdc1 PE=1 SV=1	15	8	15	8	87.4	Pdxdc1	53132.3	103153	86815.7	35881.5	168490	274592	9.51582e+06	3.45115e+06
High	Master Protein	P35278	Ras-related protein Rab-5C OS=Mus musculus OX=10090 GN=Rab5c PE=1 SV=2	36	6	15	4	23.4	Rab5c	159821				241866	495657	9.78991e+06	6.41656e+06
High	Master Protein	Q9CQS5	Serine/threonine-protein kinase RIO2 OS=Mus musculus OX=10090 GN=Riok2 PE=1 SV=1	15	7	15	7	62.5	Riok2	938155	728967	726544		1.10292e+06	1.2537e+06	1.77691e+06	1.49176e+06
High	Master Protein	Q9R1B9	Slit homolog 2 protein OS=Mus musculus OX=10090 GN=Slit2 PE=2 SV=2	7	9	15	9	168.7	Slit2	827698	484878	650251	178110	537452	1.04308e+06	4.99212e+06	1.68202e+06
High	Master Protein	Q9CQ65	S-methyl-5'-thioadenosine phosphorylase OS=Mus musculus OX=10090 GN=Mtap PE=1 SV=1	29	6	15	6	31	Mtap	555529	565079	161584		1.43769e+06	821035	8.97254e+06	5.58776e+06
High	Master Protein	P42669	Transcriptional activator protein Pur-alpha OS=Mus musculus OX=10090 GN=Pura PE=1 SV=1	24	5	15	5	34.9	Pura	1.04294e+06	784384	981578	1.13459e+06	1.16599e+06	929975	6.75538e+06	5.8684e+06
High	Master Protein	Q9QUI0	Transforming protein RhoA OS=Mus musculus OX=10090 GN=Rhoa PE=1 SV=1	28	5	15	5	21.8	Rhoa	69872.7	30041.5			330082	608622	6.27093e+06	5.34303e+06
High	Master Protein	Q6IRU2	Tropomyosin alpha-4 chain OS=Mus musculus OX=10090 GN=Tpm4 PE=1 SV=3	30	9	15	8	28.5	Tpm4	263128	68813.1	168421	50186.3	439257	664247	7.00589e+06	1.49442e+06
High	Master Protein	Q792Z1	Trypsin 10 OS=Mus musculus OX=10090 GN=Try10 PE=1 SV=1	8	1	15	1	26.2	Try10	547676	541914	427317			921265	1.715e+06	1.3412e+06
High	Master Protein	J3QMG3	Voltage-dependent anion-selective channel protein 3 OS=Mus musculus OX=10090 GN=Vdac3 PE=1 SV=1	28	7	15	6	30.8		437504	243510	1.2105e+06	9312.75	345543	411924	4.34573e+06	4.74996e+06
High	Master Protein	P33434	72 kDa type IV collagenase OS=Mus musculus OX=10090 GN=Mmp2 PE=1 SV=1	25	10	14	10	74.1	Mmp2	88424.7	63814.6	60248.7		57455.9	237776	3.73172e+06	990893
High	Master Protein	Q9CPQ8	ATP synthase subunit g, mitochondrial OS=Mus musculus OX=10090 GN=Atp5mg PE=1 SV=1	42	3	14	3	11.4	Atp5l	32165	31364.9	47258.2	5982.66	36938.7	425970	3.76468e+06	5.23284e+06
High	Master Protein	P16015	Carbonic anhydrase 3 OS=Mus musculus OX=10090 GN=Ca3 PE=1 SV=3	37	7	14	7	29.3	Car3	26331	33879.2	24264.6		63951.4	189902	5.93577e+06	6.59062e+06
High	Master Protein	P48758	Carbonyl reductase [NADPH] 1 OS=Mus musculus OX=10090 GN=Cbr1 PE=1 SV=3	33	6	14	6	30.6	Cbr1	118732	66575.8	149924	10043.8	218401	403230	5.78139e+06	2.93573e+06
High	Master Protein	Q9WVJ3	Carboxypeptidase Q OS=Mus musculus OX=10090 GN=Cpq PE=1 SV=1	24	7	14	7	51.8	Cpq; Pgcp	33264.9	3565.49	10662.5	461830		47942.5	5.42595e+06	3.12667e+06
High	Master Protein	Q8CG16	Complement C1r-A subcomponent OS=Mus musculus OX=10090 GN=C1ra PE=1 SV=1	11	5	14	5	80	C1ra	1.59851e+06	1.25234e+06	1.69892e+06	62105.9	2.28105e+06	1.64278e+07	5.33099e+08	6.02876e+08
High	Master Protein	Q9WUM3	Coronin-1B OS=Mus musculus OX=10090 GN=Coro1b PE=1 SV=1	27	7	14	7	53.9	Coro1b	17492.1	19773.5	59622.9		78176.5	241848	1.20321e+07	4.611e+06
High	Master Protein	P57759	Endoplasmic reticulum resident protein 29 OS=Mus musculus OX=10090 GN=Erp29 PE=1 SV=2	24	5	14	5	28.8	Erp29	1.35649e+06	1.10829e+06	975684	290380	3.73301e+06	2.55895e+06	2.83219e+06	1.80782e+06
High	Master Protein	Q08879	Fibulin-1 OS=Mus musculus OX=10090 GN=Fbln1 PE=1 SV=2	9	5	14	5	78	Fbln1	60408.4	56603.8	91425.4	260558	120839	236035	9.48738e+06	3.80614e+06
High	Master Protein	Q3UHU8	General transcription factor II-I OS=Mus musculus OX=10090 GN=Gtf2i PE=1 SV=1	12	8	14	8	108.3	Gtf2i	298207	61959	114318		151696	404388	9.41947e+06	3.54792e+06
High	Master Protein	P01786	Ig heavy chain V region MOPC 47A OS=Mus musculus OX=10090 PE=1 SV=1	21	2	14	1	13	Ighvhs107.a3.106	1.17248e+06	360842	959930	257059	670342	788123
High	Master Protein	P01642	Ig kappa chain V-V region L7 (Fragment) OS=Mus musculus OX=10090 GN=Gm10881 PE=1 SV=1	23	2	14	2	12.6	Igkv5-48; Igkv12-47	1.478e+06	764737	323732	285684	1.35231e+06	1.54245e+06	821470	80895.3
High	Master Protein	A0A075B5X4	Immunoglobulin heavy variable V8-11 (Fragment) OS=Mus musculus OX=10090 GN=Ighv8-11 PE=4 SV=2	22	2	14	2	13.1		476236	319342	332698	68656.5	1.05111e+06	618603		170624
High	Master Protein	A0A0G2JDE1	Immunoglobulin heavy variable V8-12 (Fragment) OS=Mus musculus OX=10090 GN=Ighv8-12 PE=1 SV=1	18	2	14	2	13.3		1.2834e+06	989411	890780	227112	2.16351e+06	1.62067e+06	362882	571265
High	Master Protein	A0A0B4J1J2	Immunoglobulin kappa chain variable 5-43 (Fragment) OS=Mus musculus OX=10090 GN=Igkv5-43 PE=1 SV=1	23	2	14	1	12.6	Igkv5-43	241159		14691.3			407403		142099
High	Master Protein	A0A075B5M1	Immunoglobulin kappa variable 4-63 OS=Mus musculus OX=10090 GN=Igkv4-63 PE=1 SV=1	27	2	14	2	10.2		1.0063e+06	364551	181369	42100.6	846162	1.11851e+06	1.19603e+06	801934
High	Master Protein	Q9DBD0	Inhibitor of carbonic anhydrase OS=Mus musculus OX=10090 GN=Ica PE=1 SV=1	3	3	14	2	76.7	1300017J02Rik			134409	11747.3		22124.7	960384	501626
High	Master Protein	Q61087	Laminin subunit beta-3 OS=Mus musculus OX=10090 GN=Lamb3 PE=1 SV=2	8	9	14	9	128.8	Lamb3	120302	37283.4	23117.7		430315	114156	8.19843e+06	4.33628e+06
High	Master Protein	Q8CGK3	Lon protease homolog, mitochondrial OS=Mus musculus OX=10090 GN=Lonp1 PE=1 SV=2	18	12	14	12	105.8	Lonp1	29873.4	64272.6	37511.1	2806.3	96856.9	340926	6.32784e+06	6.63667e+06
High	Master Protein	Q8BP40	Lysophosphatidic acid phosphatase type 6 OS=Mus musculus OX=10090 GN=Acp6 PE=1 SV=1	22	7	14	7	47.6	Acp6	77515.6	256217	283082		54377.2	176421	4.58923e+06	3.98102e+06
High	Master Protein	Q9WUA2	Phenylalanine--tRNA ligase beta subunit OS=Mus musculus OX=10090 GN=Farsb PE=1 SV=2	14	8	14	8	65.7	Farsb	420527	126318	168177	151156	333862	594006	5.36573e+06	3.00759e+06
High	Master Protein	Q8K297	Procollagen galactosyltransferase 1 OS=Mus musculus OX=10090 GN=Colgalt1 PE=1 SV=2	11	6	14	6	71	Glt25d1; Colgalt1	350256	226204	309087		418237	749248	4.78626e+06	2.39439e+06
High	Master Protein	P21981	Protein-glutamine gamma-glutamyltransferase 2 OS=Mus musculus OX=10090 GN=Tgm2 PE=1 SV=4	10	6	14	6	77	Tgm2	85251.1	120228	61613.7	16832.8	48837.3	166592	3.4347e+06	2.17024e+06
High	Master Protein	Q91V41	Ras-related protein Rab-14 OS=Mus musculus OX=10090 GN=Rab14 PE=1 SV=3	60	10	14	9	23.9	Rab14	706597	264814	116621	76279.6	715353	604415	3.76977e+06	5.96793e+06
High	Master Protein	P51150	Ras-related protein Rab-7a OS=Mus musculus OX=10090 GN=Rab7a PE=1 SV=2	29	5	14	5	23.5	Rab7	406161	223751	138068	9984.27	512935	672284	4.49343e+06	4.50796e+06
High	Master Protein	Q8BP92	Reticulocalbin-2 OS=Mus musculus OX=10090 GN=Rcn2 PE=1 SV=1	39	8	14	8	37.2	Rcn2	33014.5	49967.5			93209.4	293630	4.46632e+06	2.09136e+06
High	Master Protein	E9QNN1	RNA helicase OS=Mus musculus OX=10090 GN=Dhx9 PE=1 SV=1	7	8	14	8	149.6	Dhx9	263568	53498	225696	50673.9	184587	279988	3.11189e+06	3.71831e+06
High	Master Protein	Q9R1T4	Septin-6 OS=Mus musculus OX=10090 GN=Septin6 PE=1 SV=4	16	7	14	2	49.6	Sept6					14922.3	18014	597848	176389
High	Master Protein	Q9D8U8	Sorting nexin-5 OS=Mus musculus OX=10090 GN=Snx5 PE=1 SV=1	22	9	14	8	46.8	Snx5	128539	155208	132941		365910	414949	6.02039e+06	2.34227e+06
High	Master Protein	Q9Z2I8	Succinate--CoA ligase [GDP-forming] subunit beta, mitochondrial OS=Mus musculus OX=10090 GN=Suclg2 PE=1 SV=3	27	8	14	8	46.8	Suclg2	86941.7	59752.7			83153.9	339593	6.44629e+06	4.79301e+06
High	Master Protein	P29788	Vitronectin OS=Mus musculus OX=10090 GN=Vtn PE=1 SV=2	11	4	14	4	54.8	Vtn	315508	169815	302611	28916.4	240124	492299	2.41142e+06	1.67056e+06
High	Master Protein	Q31125	Zinc transporter SLC39A7 OS=Mus musculus OX=10090 GN=Slc39a7 PE=1 SV=2	13	5	14	5	50.6	Slc39a7	135646	41456.8	51525.4		71727.9	92681.6	1.07257e+07	6.86826e+06
High	Master Protein	G3UZ34	116 kDa U5 small nuclear ribonucleoprotein component OS=Mus musculus OX=10090 GN=Eftud2 PE=1 SV=1	2	2	13	1	108.3		352157	78280.8	211050		174510	97021.5
High	Master Protein	Q9CQ62	2,4-dienoyl-CoA reductase, mitochondrial OS=Mus musculus OX=10090 GN=Decr1 PE=1 SV=1	31	7	13	7	36.2	Decr1	16574.7	14470.5			19770.6	155924	6.37499e+06	6.25927e+06
High	Master Protein	Q9WVJ2	26S proteasome non-ATPase regulatory subunit 13 OS=Mus musculus OX=10090 GN=Psmd13 PE=1 SV=1	27	8	13	8	42.8	Psmd13	95503.7	194792	101688	28233.2	546023	427504	2.70341e+06	2.55256e+06
High	Master Protein	H3BKL5	3-ketoacyl-CoA thiolase A, peroxisomal OS=Mus musculus OX=10090 GN=Acaa1a PE=1 SV=1	26	6	13	6	38.3				15523.4	42332.3	10680.1	34965.5	912140	1.05206e+06
High	Master Protein	Q9D1R9	60S ribosomal protein L34 OS=Mus musculus OX=10090 GN=Rpl34 PE=1 SV=2	29	5	13	5	13.3	Rpl34-ps1; Rpl34; Gm4705	1.49202e+06	742183	391479	176085	1.58744e+06	1.9711e+06	1.77013e+06	2.35042e+06
High	Master Protein	Q9R0X4	Acyl-coenzyme A thioesterase 9, mitochondrial OS=Mus musculus OX=10090 GN=Acot9 PE=1 SV=1	23	9	13	9	50.5	Acot9	138588	138480	117724	46067.2	227543	440370	4.67668e+06	3.00359e+06
High	Master Protein	B1AV77	Aldehyde dehydrogenase OS=Mus musculus OX=10090 GN=Aldh3a2 PE=1 SV=1	9	3	13	2	54.3	Aldh3a2	31859.2	13626.1	17144.4		27087.5	65529.5	947797	751901
High	Master Protein	Q8VCT3	Aminopeptidase B OS=Mus musculus OX=10090 GN=Rnpep PE=1 SV=2	16	8	13	8	72.4	Rnpep	78880.2	14665.1	26666.8			48396.8	3.74147e+06	999174
High	Master Protein	P56135	ATP synthase subunit f, mitochondrial OS=Mus musculus OX=10090 GN=Atp5mf PE=1 SV=3	38	3	13	3	10.3	Atp5j2	662649	351968	296571	126456	581088	191561	2.27206e+06	3.57151e+06
High	Master Protein	O88967	ATP-dependent zinc metalloprotease YME1L1 OS=Mus musculus OX=10090 GN=Yme1l1 PE=1 SV=1	14	7	13	7	80	Yme1l1	404169	345279	359600		332590	649220	5.7467e+06	2.61577e+06
High	Master Protein	Q9DBL7	Bifunctional coenzyme A synthase OS=Mus musculus OX=10090 GN=Coasy PE=1 SV=2	18	7	13	7	62	Coasy	123304	36813	42177.4	11211.3	53226.8	69496.8	3.32388e+06	1.61682e+06
High	Master Protein	Q8R422	CD109 antigen OS=Mus musculus OX=10090 GN=Cd109 PE=1 SV=1	6	5	13	5	161.6	Cd109	159559	183250	53284.8	51517.1	472489	185817	889986	396802
High	Master Protein	Q3U962	Collagen alpha-2(V) chain OS=Mus musculus OX=10090 GN=Col5a2 PE=1 SV=1	7	7	13	7	144.9	Col5a2	5.25035e+06	802436	2.41318e+06	8953.58	1.80665e+06	5.66811e+06	1.11065e+07	7.20384e+06
High	Master Protein	Q62425	Cytochrome c oxidase subunit NDUFA4 OS=Mus musculus OX=10090 GN=Ndufa4 PE=1 SV=2	56	5	13	5	9.3	Ndufa4	863881	380247	236438		1.14333e+06	1.30672e+06	7.27919e+06	1.05179e+07
High	Master Protein	Q9D0M3	Cytochrome c1, heme protein, mitochondrial OS=Mus musculus OX=10090 GN=Cyc1 PE=1 SV=1	31	8	13	8	35.3	Cyc1	111571	48303	19847.9		167795	317574	6.90237e+06	7.82008e+06
High	Master Protein	Q8R1Q8	Cytoplasmic dynein 1 light intermediate chain 1 OS=Mus musculus OX=10090 GN=Dync1li1 PE=1 SV=1	28	10	13	10	56.6	Dync1li1	137969	113732	204148	1.02648e+06	263009	248781	8.24088e+06	1.19117e+06
High	Master Protein	P25206	DNA replication licensing factor MCM3 OS=Mus musculus OX=10090 GN=Mcm3 PE=1 SV=2	10	6	13	6	91.5	Mcm3	91884.4	229727	203917	17046.9	464298	180691	18388.9	36148.7
High	Master Protein	A0A494BAK4	Endoplasmic reticulum-Golgi intermediate compartment protein 1 OS=Mus musculus OX=10090 GN=Ergic1 PE=1 SV=1	26	5	13	5	27.7		272841	196430	28125.2	25967.1	369090	513614	3.00144e+06	2.65819e+06
High	Master Protein	Q4PZA2	Endothelin-converting enzyme 1 OS=Mus musculus OX=10090 GN=Ece1 PE=1 SV=1	11	7	13	7	87	Ece1	50784.9	31481.1	54865.6	30194.4	61786.9	560937	4.66358e+06	2.3973e+06
High	Master Protein	P23116	Eukaryotic translation initiation factor 3 subunit A OS=Mus musculus OX=10090 GN=Eif3a PE=1 SV=5	5	6	13	6	161.8	Eif3a	284562	108665	200806		286657	392153	961394	340545
High	Master Protein	A0A0A0MQM0	Eukaryotic translation initiation factor 5A (Fragment) OS=Mus musculus OX=10090 GN=Eif5a PE=1 SV=1	42	5	13	5	16.3	Eif5a	147017	84731	73871	50894.1	463950	525015	5.75925e+06	2801019
High	Master Protein	D3YX76	Glutathione S-transferase OS=Mus musculus OX=10090 GN=Gstm2 PE=1 SV=1	30	5	13	2	21.7							42193.1	1.66187e+06	982782
High	Master Protein	P51855	Glutathione synthetase OS=Mus musculus OX=10090 GN=Gss PE=1 SV=1	21	7	13	7	52.2	Gss	26158.6	37259.7	204709		29291.3	88290.2	3.35784e+06	1.25924e+06
High	Master Protein	A0A0R4J039	Histidine-rich glycoprotein OS=Mus musculus OX=10090 GN=Hrg PE=1 SV=1	12	7	13	7	60.4	Hrg	78608.7	168412	88127.9	25122.1	202442	130549	4.18215e+06	2.17879e+06
High	Master Protein	A0A0G2JFZ3	Immunoglobulin kappa chain variable 19-93 (Fragment) OS=Mus musculus OX=10090 GN=Igkv19-93 PE=1 SV=4	29	3	13	2	12.8	Igkv19-93	417533	257048	78999.2	305587	459414	966729		111739
High	Master Protein	A0A075B5P1	Immunoglobulin kappa variable 3-1 (Fragment) OS=Mus musculus OX=10090 GN=Igkv3-1 PE=1 SV=7	13	1	13	1	13		270604	55494.6	45860.8	118967	145017	296246	401430	1.048e+06
High	Master Protein	P24547	Inosine-5'-monophosphate dehydrogenase 2 OS=Mus musculus OX=10090 GN=Impdh2 PE=1 SV=2	17	7	13	6	55.8	Impdh2	6.1976e+06	231971	405350	30114	752605	1.03942e+06	1.23362e+07	3.84928e+06
High	Master Protein	Q9JHU9	Inositol-3-phosphate synthase 1 OS=Mus musculus OX=10090 GN=Isyna1 PE=1 SV=1	14	6	13	6	60.9	Isyna1	59768.4					87325.1	5.00224e+06	1.14244e+06
High	Master Protein	E9PYJ9	LIM domain-binding protein 3 OS=Mus musculus OX=10090 GN=Ldb3 PE=1 SV=1	23	11	13	11	72.3	Ldb3	134504	426002	516373	233091	150809	179741	463521	7.46578e+06
High	Master Protein	P53690	Matrix metalloproteinase-14 OS=Mus musculus OX=10090 GN=Mmp14 PE=2 SV=3	9	5	13	5	65.9	Mmp14	5.93069e+06	1.7079e+06	5.10336e+06		6.07686e+06	6.19753e+06	3.65332e+06	3.98361e+06
High	Master Protein	E9QB02	Methionine--tRNA ligase, cytoplasmic OS=Mus musculus OX=10090 GN=Mars1 PE=1 SV=1	15	9	13	9	102.3	Mars	248662	225609	267219	17463	346346	502212	3.69407e+06	1.51835e+06
High	Master Protein	A2ATP6	Myelin expression factor 2 OS=Mus musculus OX=10090 GN=Myef2 PE=1 SV=2	19	9	13	9	61.1	Myef2	178349	54913.4	209014	36562.9	168335	456998	9.47539e+06	2.80276e+06
High	Master Protein	Q9DBG5	Perilipin-3 OS=Mus musculus OX=10090 GN=Plin3 PE=1 SV=1	30	7	13	7	47.2	Plin3	189440	111131	106820		225230	277565	6.4885e+06	1.86983e+06
High	Master Protein	P70296	Phosphatidylethanolamine-binding protein 1 OS=Mus musculus OX=10090 GN=Pebp1 PE=1 SV=3	55	5	13	5	20.8	Pebp1	97081.9	13435			126379	363809	4.87708e+06	2.15249e+06
High	Master Protein	Q6PB93	Polypeptide N-acetylgalactosaminyltransferase 2 OS=Mus musculus OX=10090 GN=Galnt2 PE=1 SV=1	18	9	13	9	64.5	Galnt2	527412	94396.6	224782	2409	274245	464166	6.16041e+06	3.91518e+06
High	Master Protein	Q569Z5	Probable ATP-dependent RNA helicase DDX46 OS=Mus musculus OX=10090 GN=Ddx46 PE=1 SV=2	7	7	13	7	117.4	Ddx46	864237	467185	706354		714208	791513	3.97075e+06	244578
High	Master Protein	Q8CE08	Prostatic acid phosphatase OS=Mus musculus OX=10090 GN=Acp3 PE=2 SV=1	19	6	13	6	43.7	Acpp	98545.5	17592	114610	270255	43092.5	147977	2.49815e+06	1.7667e+06
High	Master Protein	P49722	Proteasome subunit alpha type-2 OS=Mus musculus OX=10090 GN=Psma2 PE=1 SV=3	37	6	13	6	25.9	Psma2	179111	23625.1	31664	71225.6	24214.6	125987	2.71521e+06	2.10843e+06
High	Master Protein	Q9QUM9	Proteasome subunit alpha type-6 OS=Mus musculus OX=10090 GN=Psma6 PE=1 SV=1	26	5	13	5	27.4	Psma6	338509	96786.6	20990.7		436295	879746	5.75385e+06	4.51699e+06
High	Master Protein	P08207	Protein S100-A10 OS=Mus musculus OX=10090 GN=S100a10 PE=1 SV=2	32	3	13	3	11.2	S100a10	76047.5	17520.4	37008.5		119048	454638	9.77697e+06	1.02024e+07
High	Master Protein	Q3UQ44	Ras GTPase-activating-like protein IQGAP2 OS=Mus musculus OX=10090 GN=Iqgap2 PE=1 SV=2	8	9	13	7	180.4	Iqgap2	81696.5	52209.4	22197.7		14569.9	51789.2	2.37429e+06	219510
High	Master Protein	Q3TLP8	Ras-related C3 botulinum toxin substrate 1 OS=Mus musculus OX=10090 GN=Rac1 PE=1 SV=1	29	7	13	6	23.4	Rac1	294585	108759	169738	8654.09	688406	772189	8.31295e+06	6.70603e+06
High	Master Protein	P35279	Ras-related protein Rab-6A OS=Mus musculus OX=10090 GN=Rab6a PE=1 SV=4	37	7	13	7	23.6	Rab6a	253244	160597	245322		714358	691763	1.3353e+07	1.09605e+07
High	Master Protein	Q8C850	Scavenger receptor class A member 3 OS=Mus musculus OX=10090 GN=Scara3 PE=2 SV=1	15	8	13	8	65.4	Scara3	39314.3				30874.1		1.20946e+07	7.52015e+06
High	Master Protein	Q60854	Serpin B6 OS=Mus musculus OX=10090 GN=Serpinb6 PE=1 SV=1	28	10	13	10	42.6	Serpinb6a	837207	353033	258037	4436.59	867916	2.31148e+06	2.58124e+07	1.27704e+07
High	Master Protein	A0A0B4J1E2	SNW domain-containing protein 1 OS=Mus musculus OX=10090 GN=Snw1 PE=1 SV=1	25	9	13	9	61.4	Snw1	193169	946225	120717	99467.3	101985	183837	3.61021e+06	289655
High	Master Protein	Q3UTJ2	Sorbin and SH3 domain-containing protein 2 OS=Mus musculus OX=10090 GN=Sorbs2 PE=1 SV=2	11	8	13	8	132.3	Sorbs2	12431.9	6432.54	52185		33749.5	148366	7.7756e+06	3.59616e+06
High	Master Protein	A0A1B0GR78	Stromal interaction molecule 1 OS=Mus musculus OX=10090 GN=Stim1 PE=1 SV=1	14	6	13	6	62.2	Stim1	220239	8993.06	17949.6	42436.4	87724.8	63366.3	5.61599e+06	2.00994e+06
High	Master Protein	E9Q512	Thyroid hormone receptor interactor 11 OS=Mus musculus OX=10090 GN=Trip11 PE=1 SV=1	6	9	13	9	226.3	Trip11	49632.7	44619.6		106123	91216.4	38229	3.50696e+06	1.80111e+06
High	Master Protein	Q8R2Q0	Tripartite motif-containing protein 29 OS=Mus musculus OX=10090 GN=Trim29 PE=1 SV=1	19	12	13	12	65.8	Trim29	118982	79046.7	86787.6	8197.58	102857	335961	2.21025e+07	3.01475e+06
High	Master Protein	Q91WQ3	Tyrosine--tRNA ligase, cytoplasmic OS=Mus musculus OX=10090 GN=Yars1 PE=1 SV=3	22	11	13	11	59.1	Yars	540186	362318	263941		638747	876531	1.06195e+07	3.37909e+06
High	Master Protein	Q9JKB3	Y-box-binding protein 3 OS=Mus musculus OX=10090 GN=Ybx3 PE=1 SV=2	18	5	13	2	38.8	Csda; Ybx3		44533.7			106818		977015	547001
High	Master Protein	Q8BJY1	26S proteasome non-ATPase regulatory subunit 5 OS=Mus musculus OX=10090 GN=Psmd5 PE=1 SV=4	20	8	12	8	55.9	Psmd5	165947	159023	92124.8	7598.04	264339	497747	2.84226e+06	1.58067e+06
High	Master Protein	Q9JHW9	Aldehyde dehydrogenase family 1 member A3 OS=Mus musculus OX=10090 GN=Aldh1a3 PE=1 SV=1	20	8	12	7	56.1	Aldh1a3						14142.5	8.2785e+06	1.04991e+06
High	Master Protein	Q9DCX2	ATP synthase subunit d, mitochondrial OS=Mus musculus OX=10090 GN=Atp5pd PE=1 SV=3	53	7	12	7	18.7	Atp5h	114685	33873.7	12524.1	3708.82	55090.4	65761.7	2.49567e+06	2.97723e+06
High	Master Protein	P59017	Bcl-2-like protein 13 OS=Mus musculus OX=10090 GN=Bcl2l13 PE=1 SV=2	28	7	12	7	46.7	Bcl2l13	54110.6	33899.2	16302.3		47065.3	240282	8.18517e+06	6.63569e+06
High	Master Protein	E9Q906	Catenin delta-1 OS=Mus musculus OX=10090 GN=Ctnnd1 PE=1 SV=1	9	7	12	7	93.4		182781	126511	99457.1		234397	299771	4.15574e+06	1.18918e+06
High	Master Protein	P45591	Cofilin-2 OS=Mus musculus OX=10090 GN=Cfl2 PE=1 SV=1	28	4	12	2	18.7	Cfl2						29993.3	590978	864034
High	Master Protein	Q9WUM4	Coronin-1C OS=Mus musculus OX=10090 GN=Coro1c PE=1 SV=2	24	9	12	9	53.1	Coro1c	337094	66491.9	89956.5		231311	373630	1.51087e+07	7.6598e+06
High	Master Protein	Q8CHT0	Delta-1-pyrroline-5-carboxylate dehydrogenase, mitochondrial OS=Mus musculus OX=10090 GN=Aldh4a1 PE=1 SV=3	14	6	12	6	61.8	Aldh4a1	232613	58833.2	61566.3		153721	129613	8.9925e+06	3.42994e+06
High	Master Protein	Q9EQP2	EH domain-containing protein 4 OS=Mus musculus OX=10090 GN=Ehd4 PE=1 SV=1	26	11	12	9	61.4	Ehd4		32822.2	25538.6	8803.32	15810.4	111991	4.27372e+06	1.07721e+06
High	Master Protein	Q8BH95	Enoyl-CoA hydratase, mitochondrial OS=Mus musculus OX=10090 GN=Echs1 PE=1 SV=1	22	5	12	5	31.5	Echs1	174888	27687.9		4833.8	93798.4	168496	3.78314e+06	3.70034e+06
High	Master Protein	F8VPU2	FERM, ARHGEF and pleckstrin domain-containing protein 1 OS=Mus musculus OX=10090 GN=Farp1 PE=1 SV=1	6	5	12	5	118.8	Farp1	628293	263528	471749		480857	533977	1.02619e+06	271382
High	Master Protein	P37889	Fibulin-2 OS=Mus musculus OX=10090 GN=Fbln2 PE=1 SV=2	6	7	12	7	131.7	Fbln2	757112	690717	915815		812146	725296	4.30779e+06	2.80984e+06
High	Master Protein	P10649	Glutathione S-transferase Mu 1 OS=Mus musculus OX=10090 GN=Gstm1 PE=1 SV=2	24	5	12	2	26	Gstm1	80741.4	201133	112111		535463	388250	7.90836e+06	4.45121e+06
High	Master Protein	A0A6I8MX07	Golgin subfamily A member 2 OS=Mus musculus OX=10090 GN=Golga2 PE=4 SV=1	9	8	12	8	116.2		340431	286357	134676	12964.8	694254	862344	1.25704e+07	4.97581e+06
High	Master Protein	Q08048	Hepatocyte growth factor OS=Mus musculus OX=10090 GN=Hgf PE=1 SV=1	10	7	12	7	82.9	Hgf	477716	266339	262955	8011.02	569281	703110	689838	564403
High	Master Protein	P10922	Histone H1.0 OS=Mus musculus OX=10090 GN=H1-0 PE=2 SV=4	28	5	12	5	20.8	H1f0	829066	676038	654715	231617	339561	2.61985e+06	1.3941e+08	4.45996e+07
High	Master Protein	Q8VD75	Huntingtin-interacting protein 1 OS=Mus musculus OX=10090 GN=Hip1 PE=1 SV=2	8	8	12	8	115.1	Hip1					9510.53	31065.9	3.5489e+06	1.91663e+06
High	Master Protein	Q9QUP5	Hyaluronan and proteoglycan link protein 1 OS=Mus musculus OX=10090 GN=Hapln1 PE=1 SV=1	26	8	12	8	40.5	Hapln1	74501.4	62843.3	72255	26989	18434.5	379665	1.14425e+07	9.37196e+06
High	Master Protein	P18531	Ig heavy chain V region 3-6 OS=Mus musculus OX=10090 GN=Ighv3-6 PE=1 SV=1	22	2	12	2	13.1	Gm16932; Ighv3-6	173603	103257	259336	116902	332307	225117	261562	463986
High	Master Protein	O55222	Integrin-linked protein kinase OS=Mus musculus OX=10090 GN=Ilk PE=1 SV=2	15	7	12	7	51.3	Ilk	197016	185298	198503	144926	209990	294061	6.86762e+06	1.87079e+06
High	Master Protein	A0A1L1STE4	Interleukin enhancer-binding factor 3 OS=Mus musculus OX=10090 GN=Ilf3 PE=1 SV=1	9	7	12	7	97.4	Ilf3	152335	31507.6	99997.5	8607.44	125122	158965	6.31971e+06	1.88008e+06
High	Master Protein	Q8BU30	Isoleucine--tRNA ligase, cytoplasmic OS=Mus musculus OX=10090 GN=Iars1 PE=1 SV=2	10	10	12	10	144.2	Iars	1.73573e+06	581214	890623	116601	862642	2.15954e+06	4.0073e+06	948840
High	Master Protein	Q9JHI5	Isovaleryl-CoA dehydrogenase, mitochondrial OS=Mus musculus OX=10090 GN=Ivd PE=1 SV=1	20	7	12	7	46.3	Ivd		92326.5	18320	407222	124705	284344	9002070	7.45496e+06
High	Master Protein	Q6PB66	Leucine-rich PPR motif-containing protein, mitochondrial OS=Mus musculus OX=10090 GN=Lrpprc PE=1 SV=2	9	10	12	10	156.5	Lrpprc	252438	163643	157105	75915.7	288455	507180	2.98031e+06	757051
High	Master Protein	P17047	Lysosome-associated membrane glycoprotein 2 OS=Mus musculus OX=10090 GN=Lamp2 PE=1 SV=2	10	5	12	5	45.7	Lamp2	17639.8	139352	106469		175410	287749	1.26583e+07	5.0903e+06
High	Master Protein	P63085	Mitogen-activated protein kinase 1 OS=Mus musculus OX=10090 GN=Mapk1 PE=1 SV=3	18	7	12	6	41.2	Mapk1	383999	449568	465587	131949	805906	604375	2.75513e+06	2.96189e+06
High	Master Protein	Q99LX5	Multiple myeloma tumor-associated protein 2 homolog OS=Mus musculus OX=10090 GN=Mmtag2 PE=2 SV=1	19	4	12	4	29.3	2310033P09Rik	288011	138596	49521	76990.8	635392	676917	876477	627793
High	Master Protein	H3BIX4	Neuroplastin (Fragment) OS=Mus musculus OX=10090 GN=Nptn PE=1 SV=1	19	4	12	4	24.4		101033	46721.8	129324		184928	211578	8.27998e+06	5.66837e+06
High	Master Protein	Q9CZ30	Obg-like ATPase 1 OS=Mus musculus OX=10090 GN=Ola1 PE=1 SV=1	14	5	12	5	44.7	Ola1	204262	209861	20627.6	40523.8	229436	443364	3924306	1.06419e+06
High	Master Protein	Q9JK53	Prolargin OS=Mus musculus OX=10090 GN=Prelp PE=1 SV=2	13	5	12	5	43.3	Prelp	70458.6	114418	20307.9	5518.39		51640.3	6.53866e+06	4.07625e+06
High	Master Protein	G3X928	SEC23-interacting protein OS=Mus musculus OX=10090 GN=Sec23ip PE=1 SV=1	11	7	12	7	110.7	Sec23ip	81431.4	60222.7	75844.8	42884.6	50689.1	217937	4.97571e+06	1.49336e+06
High	Master Protein	O08665	Semaphorin-3A OS=Mus musculus OX=10090 GN=Sema3a PE=1 SV=2	12	9	12	9	88.8	Sema3a	547660	228263	447397		714358	928729	876585	613471
High	Master Protein	P14094	Sodium/potassium-transporting ATPase subunit beta-1 OS=Mus musculus OX=10090 GN=Atp1b1 PE=1 SV=1	16	5	12	5	35.2	Atp1b1			31831	7979.19		286090	1.35578e+07	6.43762e+06
High	Master Protein	Q9CW03	Structural maintenance of chromosomes protein 3 OS=Mus musculus OX=10090 GN=Smc3 PE=1 SV=2	10	10	12	10	141.5	Smc3	15454.6	42029.5	104767	53648.1	126709	286133	5.21568e+06	1.16489e+06
High	Master Protein	Q9WUM5	Succinate--CoA ligase [ADP/GDP-forming] subunit alpha, mitochondrial OS=Mus musculus OX=10090 GN=Suclg1 PE=1 SV=4	16	5	12	5	36.1	Suclg1	43640.1	40908.1	45535.3		212977	313942	7.25269e+06	1.0777e+07
High	Master Protein	Q8BFY9	Transportin-1 OS=Mus musculus OX=10090 GN=Tnpo1 PE=1 SV=2	8	7	12	7	102.3	Tnpo1	444035	180936	254242	9373.35	477151	604651	1.52271e+06	613849
High	Master Protein	E9PYH0	Versican core protein OS=Mus musculus OX=10090 GN=Vcan PE=1 SV=1	2	5	12	5	366.7	Vcan		25905.4	55114.8	12648.4	95197.8	129869	5.24707e+06	3.70278e+06
High	Master Protein	O08547	Vesicle-trafficking protein SEC22b OS=Mus musculus OX=10090 GN=Sec22b PE=1 SV=3	39	8	12	8	24.7	Sec22b	88962.9	123357	108205	25422	212927	638617	8.2866e+06	8.80486e+06
High	Master Protein	Q9DB42	Zinc finger protein 593 OS=Mus musculus OX=10090 GN=Znf593 PE=1 SV=2	19	2	12	2	15.1	Zfp593	423342	336536	163668		1.13694e+06	886492	4.58783e+06	3.08574e+06
High	Master Protein	P19253	60S ribosomal protein L13a OS=Mus musculus OX=10090 GN=Rpl13a PE=1 SV=4	21	5	11	5	23.4	Rpl13a	1.07589e+06	515699	165356	12972.5	1.44052e+06	1.18323e+06	1.28047e+06	1.04363e+06
High	Master Protein	P84099	60S ribosomal protein L19 OS=Mus musculus OX=10090 GN=Rpl19 PE=1 SV=1	17	4	11	4	23.5	Rpl19; Rpl19-ps11	1.41401e+06	550644	288528		1.78505e+06	1.85145e+06	1.48135e+06	1.10354e+06
High	Master Protein	Q9CQ60	6-phosphogluconolactonase OS=Mus musculus OX=10090 GN=Pgls PE=1 SV=1	43	6	11	6	27.2	Pgls	24819	71259.2				69729.4	1.19121e+06	1.15761e+06
High	Master Protein	K3W4Q8	Basigin OS=Mus musculus OX=10090 GN=Bsg PE=1 SV=1	23	4	11	4	24.1	Bsg	123163	151767	131193		334593	663178	1.50042e+07	1.19713e+07
High	Master Protein	Q61335	B-cell receptor-associated protein 31 OS=Mus musculus OX=10090 GN=Bcap31 PE=1 SV=4	22	6	11	6	27.9	Bcap31	17338.4	29288.6	6491.94		134435	297119	6.19834e+06	3.43207e+06
High	Master Protein	Q80V42	Carboxypeptidase M OS=Mus musculus OX=10090 GN=Cpm PE=1 SV=2	19	7	11	7	50.5	Cpm						32028.8	4.03597e+06	2.80977e+06
High	Master Protein	Q99LM2	CDK5 regulatory subunit-associated protein 3 OS=Mus musculus OX=10090 GN=Cdk5rap3 PE=1 SV=1	18	6	11	6	57	Cdk5rap3	272584	60306	133975	4854.72	28850		2.09278e+06	865949
High	Master Protein	Q06890	Clusterin OS=Mus musculus OX=10090 GN=Clu PE=1 SV=1	17	5	11	5	51.6	Clu	126845	140024	47583.2	634898	310869	508138	6.14641e+06	3.46473e+06
High	Master Protein	Q3U1J4	DNA damage-binding protein 1 OS=Mus musculus OX=10090 GN=Ddb1 PE=1 SV=2	12	10	11	10	126.8	Ddb1	713265	514265	638202	31308.2	1.11924e+06	1.15101e+06	6.51697e+06	3.37933e+06
High	Master Protein	P46978	Dolichyl-diphosphooligosaccharide--protein glycosyltransferase subunit STT3A OS=Mus musculus OX=10090 GN=Stt3a PE=1 SV=1	10	7	11	7	80.5	Stt3a	877626	405514	567500	33016.3	853113	1.46713e+06	3.03888e+06	2.42292e+06
High	Master Protein	P42125	Enoyl-CoA delta isomerase 1, mitochondrial OS=Mus musculus OX=10090 GN=Eci1 PE=1 SV=2	22	5	11	5	32.2	Eci1	49622.4	19098.5	29011		13660.4	103373	1.81459e+06	3.48473e+06
High	Master Protein	Q8BWY3	Eukaryotic peptide chain release factor subunit 1 OS=Mus musculus OX=10090 GN=Etf1 PE=1 SV=4	21	7	11	7	49	Etf1	289224	64189.6	156659		447470	511758	4.1734e+06	1.2269e+06
High	Master Protein	Q8BGD9	Eukaryotic translation initiation factor 4B OS=Mus musculus OX=10090 GN=Eif4b PE=1 SV=1	11	5	11	5	68.8	Eif4b	538063	176759	477376	29722.2	617511	698308	298775	68684.1
High	Master Protein	Q3TZZ7	Extended synaptotagmin-2 OS=Mus musculus OX=10090 GN=Esyt2 PE=1 SV=1	14	7	11	7	94.1	Esyt2	377079	259113	256054	134235	413785	456718	324628	195978
High	Master Protein	Q8K0C9	GDP-mannose 4,6 dehydratase OS=Mus musculus OX=10090 GN=Gmds PE=1 SV=1	24	8	11	8	42	Gmds	76112.3	17020.6	29638.4	13061.4	145933	149456	3.82491e+06	4.02303e+06
High	Master Protein	D3Z7P4	Glutaminase OS=Mus musculus OX=10090 GN=Gls PE=1 SV=1	11	5	11	5	54.7		399780	424049	239399		722750	1.11931e+06	1.10603e+07	4.58536e+06
High	Master Protein	Q9WUB3	Glycogen phosphorylase, muscle form OS=Mus musculus OX=10090 GN=Pygm PE=1 SV=3	10	7	11	3	97.2	Pygm							364971	431564
High	Master Protein	Q9CZJ2	Heat shock 70 kDa protein 12B OS=Mus musculus OX=10090 GN=Hspa12b PE=1 SV=1	13	6	11	6	76.1	Hspa12b	473991	150824	261086	118317	300398	679420	13438.1
High	Master Protein	P14602	Heat shock protein beta-1 OS=Mus musculus OX=10090 GN=Hspb1 PE=1 SV=3	44	6	11	6	23	Hspb1		29186.6	10839.8		178620	126140	5.71642e+06	1.95785e+06
High	Master Protein	Q61191	Host cell factor 1 OS=Mus musculus OX=10090 GN=Hcfc1 PE=1 SV=2	7	10	11	10	210.3	Hcfc1	98322.2	61826.7	88427.5		140138	380124	5.95925e+06	2.05149e+06
High	Master Protein	A0A075B5S9	Immunoglobulin heavy variable 9-4 OS=Mus musculus OX=10090 GN=Ighv9-4 PE=4 SV=1	23	2	11	2	10.9		862316	970866	769266	358635	1.53993e+06	1.22792e+06
High	Master Protein	A0A0B4J1H6	Immunoglobulin kappa chain variable 2-137 (Fragment) OS=Mus musculus OX=10090 GN=Igkv2-137 PE=4 SV=1	20	2	11	2	13.1	Igkv2-137	1.28448e+06	461795	692115	79755.9	853567	1.25916e+06	234648	43641.9
High	Master Protein	Q60793	Krueppel-like factor 4 OS=Mus musculus OX=10090 GN=Klf4 PE=1 SV=3	12	3	11	3	51.8	Klf4	210859	47145.5	241490		274469	458039	113189	59149.2
High	Master Protein	Q61292	Laminin subunit beta-2 OS=Mus musculus OX=10090 GN=Lamb2 PE=1 SV=2	8	10	11	10	196.5	Lamb2	644578	42477.7	491931	33461.3	189638	192995	2.40956e+06	2.00157e+06
High	Master Protein	Q8BMJ2	Leucine--tRNA ligase, cytoplasmic OS=Mus musculus OX=10090 GN=Lars1 PE=1 SV=2	11	9	11	9	134.1	Lars	113344	74790.2	126790		169945	375925	1.7182e+06	389498
High	Master Protein	P32067	Lupus La protein homolog OS=Mus musculus OX=10090 GN=Ssb PE=1 SV=1	11	4	11	4	47.7	Ssb	206940	106095	106229		254031	247431	437978	52208.9
High	Master Protein	O89029	Matrilin-4 OS=Mus musculus OX=10090 GN=Matn4 PE=1 SV=1	14	7	11	7	68.9	Matn4	109816	243876	134018	33443.1	180129	177734	2.67252e+06	1.6508e+06
High	Master Protein	P14873	Microtubule-associated protein 1B OS=Mus musculus OX=10090 GN=Map1b PE=1 SV=2	5	9	11	8	270.1	Map1b; Mtap1b		792350	265037		33959.8	67784.6	3.04024e+06	1.2393e+06
High	Master Protein	Q9D880	Mitochondrial import inner membrane translocase subunit TIM50 OS=Mus musculus OX=10090 GN=Timm50 PE=1 SV=1	18	5	11	5	39.8	Timm50	1.50238e+06	1.94236e+06	785830	18016.4	1.45105e+06	1.68106e+06	2.36208e+06	2.53119e+06
High	Master Protein	Q9CZW5	Mitochondrial import receptor subunit TOM70 OS=Mus musculus OX=10090 GN=Tomm70 PE=1 SV=2	12	6	11	6	67.5	Tomm70a	85238.7	46128	47765.1		91735.4	165479	5.62742e+06	1.29997e+06
High	Master Protein	Q9CZR2	N-acetylated-alpha-linked acidic dipeptidase 2 OS=Mus musculus OX=10090 GN=Naalad2 PE=1 SV=2	16	8	11	8	82.7	Naalad2		351095	19708.9		71110.1	21781	2.27005e+06	1.15754e+06
High	Master Protein	Q8BKJ9	NAD-dependent protein deacetylase sirtuin-7 OS=Mus musculus OX=10090 GN=Sirt7 PE=1 SV=2	7	2	11	2	45.1	Sirt7	121073	79763.9	72815.9		86490.4	163456
High	Master Protein	P97350	Plakophilin-1 OS=Mus musculus OX=10090 GN=Pkp1 PE=1 SV=1	8	5	11	5	80.8	Pkp1	170723	23784.1	48461.3	12322.4	220605	276366	6.82113e+06	1.41464e+06
High	Master Protein	Q9DBE9	pre-rRNA 2'-O-ribose RNA methyltransferase FTSJ3 OS=Mus musculus OX=10090 GN=Ftsj3 PE=1 SV=1	14	8	11	8	95.5	Ftsj3	338813	137463	263509		342706	464626		83892.9
High	Master Protein	P17918	Proliferating cell nuclear antigen OS=Mus musculus OX=10090 GN=Pcna PE=1 SV=2	18	5	11	5	28.8	Pcna	466111	225804	40818.1	19679.5	767109	617511	2.34452e+06	1.18058e+06
High	Master Protein	Q9R1P1	Proteasome subunit beta type-3 OS=Mus musculus OX=10090 GN=Psmb3 PE=1 SV=1	27	4	11	4	22.9	Psmb3	676010	223379	32334.3	136722	273881	472125	1.66076e+06	1.92325e+06
High	Master Protein	J3QNM3	Protein enabled homolog OS=Mus musculus OX=10090 GN=Enah PE=1 SV=1	16	10	11	10	84.5		49811.4	72749.9	64783.8		148161	178941	1.17905e+07	2.95839e+06
High	Master Protein	Q8BK67	Protein RCC2 OS=Mus musculus OX=10090 GN=Rcc2 PE=1 SV=1	12	6	11	6	55.9	Rcc2	725665	254963	485560	27608.4	779957	839004	532575	249717
High	Master Protein	Q543K9	Purine nucleoside phosphorylase OS=Mus musculus OX=10090 GN=Pnp PE=1 SV=1	23	5	11	5	32.2	Pnp	100638	77511.2	30706.4		156780	320146	3.03268e+06	2.3151e+06
High	Master Protein	G5E8R3	Pyruvate carboxylase OS=Mus musculus OX=10090 GN=Pcx PE=1 SV=1	9	7	11	7	129.6	Pcx	21124.4	47332.1	20805.7		24272.9	106558	1.94026e+06	1.23226e+06
High	Master Protein	Q8BKZ9	Pyruvate dehydrogenase protein X component, mitochondrial OS=Mus musculus OX=10090 GN=Pdhx PE=1 SV=1	14	6	11	6	54	Pdhx	53133.6	24101.4	25543.4		51303.6	93423.5	4.71175e+06	2.98071e+06
High	Master Protein	Q8VE37	Regulator of chromosome condensation OS=Mus musculus OX=10090 GN=Rcc1 PE=1 SV=1	21	8	11	8	44.9	Rcc1	122226	121920	267406	10749.1	79431.6	203886	7.14297e+06	5.01662e+06
High	Master Protein	Q8C2Q3	RNA-binding protein 14 OS=Mus musculus OX=10090 GN=Rbm14 PE=1 SV=1	8	4	11	4	69.4	Rbm14	147395	160559	242584	33993.7	191918	253901	1.43682e+06	1.26669e+06
High	Master Protein	B2RY56	RNA-binding protein 25 OS=Mus musculus OX=10090 GN=Rbm25 PE=1 SV=2	8	4	11	4	99.5	Rbm25	369365	84895.3	261209	47748.8	326712	463596	107420	80629.7
High	Master Protein	Q8C650	Septin-10 OS=Mus musculus OX=10090 GN=Septin10 PE=1 SV=1	6	3	11	1	52.4	Sept10	57793.3		44342.8		22263.2	54157.4	649751
High	Master Protein	G3X9V8	Serine (or cysteine) peptidase inhibitor, clade B (ovalbumin), member 3A OS=Mus musculus OX=10090 GN=Serpinb3a PE=1 SV=1	30	10	11	10	44.4	Serpinb3a	226694	189727	238173	20734.3	377818	668793	1.60949e+07	6.02227e+06
High	Master Protein	Q9R118	Serine protease HTRA1 OS=Mus musculus OX=10090 GN=Htra1 PE=1 SV=2	22	9	11	9	51.2	Htra1	107915	20969.1	54264.6	21207.9	100731	16534.6	2.04995e+06	2.14283e+06
High	Master Protein	P63328	Serine/threonine-protein phosphatase 2B catalytic subunit alpha isoform OS=Mus musculus OX=10090 GN=Ppp3ca PE=1 SV=1	14	6	11	5	58.6	Ppp3ca	18894.1	33038.8	27654.9		82247.6	37924.6	6.21915e+06	2.55314e+06
High	Master Protein	Q9WVB4	Slit homolog 3 protein OS=Mus musculus OX=10090 GN=Slit3 PE=2 SV=2	6	8	11	8	167.6	Slit3	570117	161573	239132		260403	806343	465491	69779.4
High	Master Protein	P08228	Superoxide dismutase [Cu-Zn] OS=Mus musculus OX=10090 GN=Sod1 PE=1 SV=2	46	7	11	7	15.9	Sod1	94461.4	88047	15653.2	3080.42	211598	720541	1.1611e+07	8.59524e+06
High	Master Protein	Q70IV5	Synemin OS=Mus musculus OX=10090 GN=Synm PE=1 SV=2	8	9	11	9	173.1	Synm	82599.9	104180	78690	41999.9	38757.5	114094	3.24357e+06	1.87498e+06
High	Master Protein	A0A498WGD8	Thioredoxin-like protein 1 OS=Mus musculus OX=10090 GN=Txnl1 PE=1 SV=1	33	6	11	6	32.7		100280	59341.7	70136.1		57246.7	238915	2.32246e+06	1.58646e+06
High	Master Protein	A0A0R4J1Z3	Transmembrane protein 33 OS=Mus musculus OX=10090 GN=Tmem33 PE=1 SV=1	15	4	11	4	27.9	Tmem33	320336	354699	67136.1	12729.2	598846	619061	300018	104059
High	Master Protein	Q8JZU2	Tricarboxylate transport protein, mitochondrial OS=Mus musculus OX=10090 GN=Slc25a1 PE=1 SV=1	19	6	11	6	33.9	Slc25a1	687570	372072	67570.8	20104	1.46979e+06	1.71653e+06	2.32445e+06	1.79219e+06
High	Master Protein	E9PYI8	Ubiquitin carboxyl-terminal hydrolase OS=Mus musculus OX=10090 GN=Usp14 PE=1 SV=1	22	8	11	8	52.3	Usp14	387872	175217	186299	12398.6	529202	526788	4.72325e+06	1.78467e+06
High	Master Protein	P46460	Vesicle-fusing ATPase OS=Mus musculus OX=10090 GN=Nsf PE=1 SV=2	11	8	11	8	82.6	Nsf	408374	138928	256090	53653.8	478450	555765	8.50108e+06	2.53912e+06
High	Master Protein	Q9DBH5	Vesicular integral-membrane protein VIP36 OS=Mus musculus OX=10090 GN=Lman2 PE=1 SV=2	27	8	11	8	40.4	Lman2	238377	121335	121953		168511	343707	6.84678e+06	6.08406e+06
High	Master Protein	Q62523	Zyxin OS=Mus musculus OX=10090 GN=Zyx PE=1 SV=2	17	7	11	7	60.5	Zyx	239027	189060	183246		429590	528996	2.55535e+07	8.97344e+06
High	Master Protein	P63323	40S ribosomal protein S12 OS=Mus musculus OX=10090 GN=Rps12 PE=1 SV=2	31	3	10	3	14.5	Rps12	188621	164957	94237.6	55583.2	391310	646503	4.35692e+06	4.77624e+06
High	Master Protein	P61358	60S ribosomal protein L27 OS=Mus musculus OX=10090 GN=Rpl27 PE=1 SV=2	36	4	10	4	15.8	Rpl27; LOC108167922	1.11347e+06	441209	271859	97809.8	1.36956e+06	1.346e+06	2.78106e+06	2.49471e+06
High	Master Protein	A0A0R4J107	Acyl-peptide hydrolase (Fragment) OS=Mus musculus OX=10090 GN=Apeh PE=1 SV=1	16	8	10	8	79.8		132102	78228.1	79035.9	13908	32478.6	126467	4.18823e+06	1.73437e+06
High	Master Protein	P55264	Adenosine kinase OS=Mus musculus OX=10090 GN=Adk PE=1 SV=2	12	5	10	5	40.1	Adk	155509	45785		12126.9	35828.4	415233	1.11986e+07	4.08322e+06
High	Master Protein	Q9R0Y5	Adenylate kinase isoenzyme 1 OS=Mus musculus OX=10090 GN=Ak1 PE=1 SV=1	29	4	10	4	21.5	Ak1	9732.08	7461.29	8755.22		57264.3	47532.5	2.56223e+06	2.12274e+06
High	Master Protein	P09470	Angiotensin-converting enzyme OS=Mus musculus OX=10090 GN=Ace PE=1 SV=3	6	6	10	6	150.8	Ace	23550.7	8078.06	23890.2		5446.49	29494.2	1.89037e+06	1.39441e+06
High	Master Protein	Q8C2Q8	ATP synthase subunit gamma OS=Mus musculus OX=10090 GN=Atp5c1 PE=1 SV=1	26	6	10	6	30.2	Atp5c1	1.03523e+07	6.48288e+06	8.89086e+06	42579.2	1.0193e+07	7.32392e+06	2.26408e+07	2.67777e+07
High	Master Protein	Q925I1	ATPase family AAA domain-containing protein 3 OS=Mus musculus OX=10090 GN=Atad3 PE=1 SV=1	8	5	10	5	66.7	Atad3a	214790	114702	196662	7126.02	182264	417502	3.44765e+06	431523
High	Master Protein	Q9JLV1	BAG family molecular chaperone regulator 3 OS=Mus musculus OX=10090 GN=Bag3 PE=1 SV=2	11	5	10	5	61.8	Bag3	439885	205162	272714		565151	646294	1.15977e+07	3.29099e+06
High	Master Protein	Q8BGS1	Band 4.1-like protein 5 OS=Mus musculus OX=10090 GN=Epb41l5 PE=1 SV=1	11	5	10	5	81.6	Epb4.1l5; Epb41l5	374955	262918	359396		515247	535806	190038	74193.8
High	Master Protein	P20060	Beta-hexosaminidase subunit beta OS=Mus musculus OX=10090 GN=Hexb PE=1 SV=2	13	6	10	6	61.1	Hexb	106174	40137.7	47306.6	5954.21		47276.3	5.99505e+06	3.05885e+06
High	Master Protein	P15327	Bisphosphoglycerate mutase OS=Mus musculus OX=10090 GN=Bpgm PE=1 SV=2	23	5	10	5	30	Bpgm	109820	127843	104455		79747.5	239940	6.34813e+06	5.34217e+06
High	Master Protein	A2APM3	CD44 antigen OS=Mus musculus OX=10090 GN=Cd44 PE=1 SV=1	9	4	10	4	50.7	Cd44	149424	67960.8	67521.9	459959	168936	410612	2.70798e+07	1.4628e+07
High	Master Protein	Q8R2Y2	Cell surface glycoprotein MUC18 OS=Mus musculus OX=10090 GN=Mcam PE=1 SV=1	12	6	10	6	71.5	Mcam	34398.6	21190.2	27671.5		45688.1	291194	7.9576e+06	6.01785e+06
High	Master Protein	E9QLK9	Clathrin coat assembly protein AP180 OS=Mus musculus OX=10090 GN=Snap91 PE=1 SV=2	16	8	10	6	91.8		21505.4	9424.66	8843.4	26830.1		53519.2	1.34853e+06	470166
High	Master Protein	Q91W50	Cold shock domain-containing protein E1 OS=Mus musculus OX=10090 GN=Csde1 PE=1 SV=1	8	6	10	6	88.7	Csde1	129024	157017	161701	7074.28	311883	494805	4.51193e+06	1.86575e+06
High	Master Protein	Q80T06	Elongation factor 1-delta OS=Mus musculus OX=10090 GN=Eef1d PE=1 SV=1	16	3	10	3	31.3	Eef1d	587741	251948	117246		623022	700005	1.45598e+06	959331
High	Master Protein	Q8BFZ9	Erlin-2 OS=Mus musculus OX=10090 GN=Erlin2 PE=1 SV=1	15	5	10	3	37.8	Erlin2	42689.8	146930	17330.3		320473	234025	2.96879e+06	2.46836e+06
High	Master Protein	Q8BJW6	Eukaryotic translation initiation factor 2A OS=Mus musculus OX=10090 GN=Eif2a PE=1 SV=2	14	6	10	6	64.4	Eif2a	169507	100498	251315		343062	358523	5.32483e+06	1.66061e+06
High	Master Protein	P47753	F-actin-capping protein subunit alpha-1 OS=Mus musculus OX=10090 GN=Capza1 PE=1 SV=4	20	4	10	3	32.9	Capza1	140773	54627.7			207122	337727	2.27424e+06	2.31654e+06
High	Master Protein	Q61554	Fibrillin-1 OS=Mus musculus OX=10090 GN=Fbn1 PE=1 SV=2	1	5	10	4	312.1	Fbn1	75432.1	48949.4	66760.7	5943.53	51155.5	314798	1.10084e+07	7.55092e+06
High	Master Protein	Q8VHI3	GDP-fucose protein O-fucosyltransferase 2 OS=Mus musculus OX=10090 GN=Pofut2 PE=1 SV=1	13	4	10	4	49.4	Pofut2		28890.6	11752.3		10854.6	42589.2	2.07111e+06	1.24171e+06
High	Master Protein	P46412	Glutathione peroxidase 3 OS=Mus musculus OX=10090 GN=Gpx3 PE=1 SV=2	25	5	10	5	25.4	Gpx3		71011.4		19279.7	23754.5	174609	2.49169e+06	2.32477e+06
High	Master Protein	A0A0A6YY34	Glutathione peroxidase OS=Mus musculus OX=10090 GN=Gpx1 PE=1 SV=1	47	5	10	5	16.3			39648.7	28228			96742.1	1.69701e+06	1.56768e+06
High	Master Protein	Q8BGN3	Glycerophosphocholine cholinephosphodiesterase ENPP6 OS=Mus musculus OX=10090 GN=Enpp6 PE=1 SV=1	17	6	10	6	50.6	Enpp6				14371.5	19451.9	11013.6	2.48299e+06	1.22876e+06
Medium	Master Protein	A2A930	Histone-lysine N-methyltransferase PRDM16 OS=Mus musculus OX=10090 GN=Prdm16 PE=1 SV=1	1	1	10	1	138.8	Prdm16	768091	1.11568e+06	640287	303072	1.46681e+06	1.01415e+06	1.21818e+06	881098
High	Master Protein	P01723	Ig lambda-1 chain V region OS=Mus musculus OX=10090 PE=1 SV=2	36	2	10	2	12.2	Iglv1	2.19632e+06	1.55568e+06	514162		3.50791e+06	3.02078e+06	106812
High	Master Protein	A0A0B4J1J6	Immunoglobulin heavy variable 10-1 (Fragment) OS=Mus musculus OX=10090 GN=Ighv10-1 PE=4 SV=1	28	4	10	2	13.5	Igh-V10	942468	662917	627663	95501.5	1.38427e+06	1.8379e+06	284858	376274
High	Master Protein	A0A075B5W2	Immunoglobulin heavy variable 1-52 OS=Mus musculus OX=10090 GN=Ighv1-52 PE=4 SV=1	30	3	10	2	13		97112.4	22183.3	198765		110378	92259.8
High	Master Protein	A0A075B5Q3	Immunoglobulin heavy variable 2-5 OS=Mus musculus OX=10090 GN=Ighv2-5 PE=4 SV=1	25	2	10	2	12.5		430431	333231	376143		572053	717344		195309
High	Master Protein	A0A075B5R9	Immunoglobulin heavy variable V14-3 (Fragment) OS=Mus musculus OX=10090 GN=Ighv14-3 PE=4 SV=1	20	2	10	1	13	LOC544904	1.16184e+06	34406.7	130687	336873	104470	1.32371e+06	696126	210193
High	Master Protein	O35343	Importin subunit alpha-3 OS=Mus musculus OX=10090 GN=Kpna4 PE=1 SV=1	19	6	10	4	57.9	Kpna4	39618.4	11134	24794.2		96818.6	51510.1	3.07695e+06	853078
High	Master Protein	O35344	Importin subunit alpha-4 OS=Mus musculus OX=10090 GN=Kpna3 PE=1 SV=1	17	6	10	4	57.7	Kpna3	24310.3	76508	58622		54050.4	219155	3.24388e+06	877919
High	Master Protein	A0A2I3BRQ3	Inter-alpha-trypsin inhibitor heavy chain H3 OS=Mus musculus OX=10090 GN=Itih3 PE=1 SV=1	10	6	10	6	78		142793	83439.7	104475	173668	107219	233895	3.31292e+06	4.43975e+06
High	Master Protein	P70699	Lysosomal alpha-glucosidase OS=Mus musculus OX=10090 GN=Gaa PE=1 SV=2	11	7	10	7	106.2	Gaa	58049.9	51905.5	75697.1		118733	165559	5.6059e+06	2.89243e+06
High	Master Protein	Q7TMR0	Lysosomal Pro-X carboxypeptidase OS=Mus musculus OX=10090 GN=Prcp PE=1 SV=2	14	5	10	5	55	Prcp	32410.2	15461.6	105075	33927.8	52517.4	98567.2	5.7728e+06	3.45381e+06
High	Master Protein	Q3ULD5	Methylcrotonoyl-CoA carboxylase beta chain, mitochondrial OS=Mus musculus OX=10090 GN=Mccc2 PE=1 SV=1	20	8	10	8	61.3	Mccc2						739568	1.91719e+06	1.14098e+06
High	Master Protein	Q63844	Mitogen-activated protein kinase 3 OS=Mus musculus OX=10090 GN=Mapk3 PE=1 SV=5	17	6	10	5	43	Mapk3	99773.1	85215.4	54873.4	33060.2	195599	249299	2.91293e+06	1.73285e+06
High	Master Protein	Q4FZC9	Nesprin-3 OS=Mus musculus OX=10090 GN=Syne3 PE=1 SV=1	8	6	10	6	112	4831426I19Rik; Syne3		20172.4	19067.6	69571.9	58138.8	32670.6	1.72937e+06	778323
High	Master Protein	Q9CR16	Peptidyl-prolyl cis-trans isomerase D OS=Mus musculus OX=10090 GN=Ppid PE=1 SV=3	13	5	10	4	40.7	Ppid	78909.2	9641.03			237337	285310	2.87479e+06	1.35476e+06
High	Master Protein	A2ATR8	Plasma protease C1 inhibitor OS=Mus musculus OX=10090 GN=Serping1 PE=1 SV=1	25	5	10	5	37.6	Serping1	11938.2	56862.3	20303.9		123988	100076	2.56531e+06	1.00072e+06
High	Master Protein	B2RXS4	Plexin-B2 OS=Mus musculus OX=10090 GN=Plxnb2 PE=1 SV=1	5	7	10	7	206.1	Plxnb2	106918	122270	78076.5	56638.4	52133.1	14887.9	2.88223e+06	1.33491e+06
High	Master Protein	P99026	Proteasome subunit beta type-4 OS=Mus musculus OX=10090 GN=Psmb4 PE=1 SV=1	38	6	10	6	29.1	Psmb4	150096	99786.8	59940		180101	468019	4.3359e+06	2.79601e+06
High	Master Protein	Q6P1F6	Serine/threonine-protein phosphatase 2A 55 kDa regulatory subunit B alpha isoform OS=Mus musculus OX=10090 GN=Ppp2r2a PE=1 SV=1	21	8	10	8	51.7	Ppp2r2a	266555	141658	96093.6	130395	248075	172337	6.9653e+06	1.50993e+06
High	Master Protein	Q07417	Short-chain specific acyl-CoA dehydrogenase, mitochondrial OS=Mus musculus OX=10090 GN=Acads PE=1 SV=2	29	8	10	8	44.9	Acads	27705.8	29979	34034.4		109659	32593.3	1.50024e+06	3.49213e+06
High	Master Protein	P42227	Signal transducer and activator of transcription 3 OS=Mus musculus OX=10090 GN=Stat3 PE=1 SV=2	13	6	10	6	88	Stat3	42541.9	31247.1	45659	28033.3	85038.5	168685	4.35623e+06	1.40541e+06
High	Master Protein	Q8JZX4	Splicing factor 45 OS=Mus musculus OX=10090 GN=Rbm17 PE=1 SV=1	16	5	10	5	45.3	Rbm17	539641	316546	419070	447683	854336	605155	29313.2	154650
High	Master Protein	Q9CQA3	Succinate dehydrogenase [ubiquinone] iron-sulfur subunit, mitochondrial OS=Mus musculus OX=10090 GN=Sdhb PE=1 SV=1	24	6	10	6	31.8	Sdhb	43367.7		12863		52860.9	179828	4.59764e+06	6.1439e+06
High	Master Protein	Q8BWF0	Succinate-semialdehyde dehydrogenase, mitochondrial OS=Mus musculus OX=10090 GN=Aldh5a1 PE=1 SV=1	17	7	10	7	55.9	Aldh5a1	17749			22652	19997.7	43589.3	3.21597e+06	1.67098e+06
High	Master Protein	Q8BND5	Sulfhydryl oxidase 1 OS=Mus musculus OX=10090 GN=Qsox1 PE=1 SV=1	11	8	10	8	82.7	Qsox1	57352.1	62555.4	7441.66	8968.83	38535.9	67723.7	5.17673e+06	2.07576e+06
High	Master Protein	Q8BQ46	TAF15 RNA polymerase II, TATA box binding protein (TBP)-associated factor OS=Mus musculus OX=10090 GN=Taf15 PE=1 SV=1	11	3	10	1	58.6	Taf15							129225	21358.6
High	Master Protein	P62996	Transformer-2 protein homolog beta OS=Mus musculus OX=10090 GN=Tra2b PE=1 SV=1	17	4	10	4	33.6	Tra2b	365459	56623.5	66746.4	117311	454839	341528	731210	38706.9
High	Master Protein	Q9ET30	Transmembrane 9 superfamily member 3 OS=Mus musculus OX=10090 GN=Tm9sf3 PE=1 SV=1	10	6	10	6	67.5	Tm9sf3	338117	321673	261295	7336.72	951193	742704	743678	290688
High	Master Protein	Q64737	Trifunctional purine biosynthetic protein adenosine-3 OS=Mus musculus OX=10090 GN=Gart PE=1 SV=3	12	8	10	8	107.4	Gart	95800.5	113485	161466		271152	465574	6.98168e+06	3.59612e+06
High	Master Protein	E9Q6R7	Utrophin OS=Mus musculus OX=10090 GN=Utrn PE=1 SV=1	4	9	10	9	392.5	Utrn	52768.3	11682.2			11695.8	73886.3	3.00507e+06	1.08828e+06
High	Master Protein	Q9WV55	Vesicle-associated membrane protein-associated protein A OS=Mus musculus OX=10090 GN=Vapa PE=1 SV=2	31	7	10	6	27.8	Vapa	87039.5	52814.3	57611.8		101540	379581	5.06993e+06	4.58383e+06
High	Master Protein	Q8CC88	von Willebrand factor A domain-containing protein 8 OS=Mus musculus OX=10090 GN=Vwa8 PE=1 SV=2	5	7	10	7	213.3	Vwa8	11742.2	19358.2	97570.2			20813.2	1.08971e+06	795834
High	Master Protein	Q9QYR9	Acyl-coenzyme A thioesterase 2, mitochondrial OS=Mus musculus OX=10090 GN=Acot2 PE=1 SV=2	15	5	9	2	49.6	Acot2	99736.6	71509.9	28713.9	51335	163272	262982	4.15916e+06	4.89998e+06
High	Master Protein	P28650	Adenylosuccinate synthetase isozyme 1 OS=Mus musculus OX=10090 GN=Adss1 PE=1 SV=2	16	5	9	5	50.2	Adssl1				36138.9		21549.6	143370	1.10658e+06
High	Master Protein	P46664	Adenylosuccinate synthetase isozyme 2 OS=Mus musculus OX=10090 GN=Adss2 PE=1 SV=2	13	4	9	4	50	Adss		12058.9			20422.9	63164.9	3.60728e+06	1.60817e+06
High	Master Protein	P97429	Annexin A4 OS=Mus musculus OX=10090 GN=Anxa4 PE=1 SV=4	27	7	9	7	35.9	Anxa4	47054.1	73934.4		7147.33	336976	175438	3.88851e+06	2.01624e+06
High	Master Protein	P08226	Apolipoprotein E OS=Mus musculus OX=10090 GN=Apoe PE=1 SV=2	27	7	9	7	35.8	Apoe	30213.6	33400.3	31718.2	12749.7	145033	273483	7.91322e+06	1.86452e+07
High	Master Protein	A0A498WGK2	Asparagine--tRNA ligase OS=Mus musculus OX=10090 GN=Nars PE=1 SV=1	15	6	9	6	64.2		10459.8	10924.3	12792.8	8560.47	65280.6	139439	1.4801e+06	315023
High	Master Protein	Q3TGG2	Ataxin-2-like protein OS=Mus musculus OX=10090 GN=Atxn2l PE=1 SV=1	7	6	9	6	105.4	Atxn2l	253389	127335	134779	13090.1	313817	444222	8.70946e+06	3.11695e+06
High	Master Protein	P61222	ATP-binding cassette sub-family E member 1 OS=Mus musculus OX=10090 GN=Abce1 PE=1 SV=1	12	5	9	5	67.3	Abce1	276357	165949	160151		377281	407612	1.66214e+06	602886
High	Master Protein	Q9JLV6	Bifunctional polynucleotide phosphatase/kinase OS=Mus musculus OX=10090 GN=Pnkp PE=1 SV=2	13	6	9	6	57.2	Pnkp	1.05655e+07	2.12686e+06	3.08057e+06	15149.7	1.11219e+07	9251674	4.75517e+06	3.2825e+06
High	Master Protein	Q08093	Calponin-2 OS=Mus musculus OX=10090 GN=Cnn2 PE=1 SV=1	26	6	9	5	33.1	Cnn2	98784.7	19489.9	79134.4		122535	125815	2.67286e+06	1.06694e+06
High	Master Protein	Q2UY11	Collagen alpha-1(XXVIII) chain OS=Mus musculus OX=10090 GN=Col28a1 PE=2 SV=1	6	5	9	5	118.7	Col28a1	29015.1		16758		33553.6	38911.3	3.17047e+06	1.96004e+06
High	Master Protein	O88543	COP9 signalosome complex subunit 3 OS=Mus musculus OX=10090 GN=Cops3 PE=1 SV=3	11	4	9	4	47.8	Cops3	54758.2	81131.2		22373.9	172418	235059	3.83877e+06	2.0964e+06
High	Master Protein	Q8C166	Copine-1 OS=Mus musculus OX=10090 GN=Cpne1 PE=1 SV=1	13	6	9	6	58.8	Cpne1	326343	25265	75620.8	35700.6	142707	333724	3.13325e+06	966456
High	Master Protein	Q9QZQ8	Core histone macro-H2A.1 OS=Mus musculus OX=10090 GN=Macroh2a1 PE=1 SV=3	15	4	9	2	39.7	H2afy		28590.5		12735.7	34571.2		800319	583572
High	Master Protein	Q9R0P5	Destrin OS=Mus musculus OX=10090 GN=Dstn PE=1 SV=3	27	4	9	3	18.5	Dstn	42970.4	16918.7	16264.3	123843	121888	293524	5.88339e+06	3.50279e+06
High	Master Protein	O09110	Dual specificity mitogen-activated protein kinase kinase 3 OS=Mus musculus OX=10090 GN=Map2k3 PE=1 SV=2	11	4	9	4	39.3	Map2k3	460384	149710	11996.6		625739	560911	737240	341604
High	Master Protein	Q8CBY8	Dynactin subunit 4 OS=Mus musculus OX=10090 GN=Dctn4 PE=1 SV=1	20	6	9	6	53	Dctn4	320362	216400	284270	86864.1	304072	303916	2.15148e+06	964845
High	Master Protein	Q8BL66	Early endosome antigen 1 OS=Mus musculus OX=10090 GN=Eea1 PE=1 SV=2	7	8	9	8	160.8	Eea1	19718.5	49066.9	9912.59		94964.8	146250	4.08341e+06	1.67677e+06
High	Master Protein	Q62419	Endophilin-A2 OS=Mus musculus OX=10090 GN=Sh3gl1 PE=1 SV=1	18	6	9	6	41.5	Sh3gl1	131601	96861	148178	1652071	155518	201535	5.09166e+06	1.68669e+06
High	Master Protein	Q8R180	ERO1-like protein alpha OS=Mus musculus OX=10090 GN=Ero1a PE=1 SV=2	11	4	9	4	54.1	Ero1l	63609.6	91513.7	78144.6	26875.5	223004	153319	2.0191e+06	950663
High	Master Protein	Q923D2	Flavin reductase (NADPH) OS=Mus musculus OX=10090 GN=Blvrb PE=1 SV=3	31	6	9	6	22.2	Blvrb	1.68477e+06	1.38937e+06	156148		3.95115e+06	4.08605e+06	6.45243e+06	5.88564e+06
High	Master Protein	Q60634	Flotillin-2 OS=Mus musculus OX=10090 GN=Flot2 PE=1 SV=2	19	6	9	6	47	Flot2	57363.9		19592			38592.1	2.11565e+06	1.21914e+06
High	Master Protein	Q80V26	Golgi-resident adenosine 3',5'-bisphosphate 3'-phosphatase OS=Mus musculus OX=10090 GN=Bpnt2 PE=1 SV=1	23	5	9	5	38.6	Impad1	15430.7				14063.9	25133	2.59431e+06	1.68512e+06
High	Master Protein	Q99JZ4	GTP-binding protein SAR1a OS=Mus musculus OX=10090 GN=Sar1a PE=1 SV=1	28	4	9	3	22.4	Sar1a	46006	27025.5	108207		39996.9	226237	2.12185e+06	2.22513e+06
High	Master Protein	P54869	Hydroxymethylglutaryl-CoA synthase, mitochondrial OS=Mus musculus OX=10090 GN=Hmgcs2 PE=1 SV=2	14	6	9	5	56.8	Hmgcs2	59407.9	45957.6	44270.3	9057.99	71270.1	171540	4.41972e+06	1.03233e+06
High	Master Protein	A0A0G2JFL3	Immunoglobulin heavy variable 1-71 (Fragment) OS=Mus musculus OX=10090 GN=Ighv1-71 PE=4 SV=1	20	2	9	2	13.4		240117	120098	272555	57481.2	267431	189959	1971674	1.46045e+06
High	Master Protein	A0A0B4J1I7	Immunoglobulin kappa variable 4-68 (Fragment) OS=Mus musculus OX=10090 GN=Igkv4-68 PE=4 SV=1	17	1	9	1	12.7	Igkv4-68	131524	161045	74300.9	446445	92854	177370	286774	99240.2
High	Master Protein	O35367	Keratocan OS=Mus musculus OX=10090 GN=Kera PE=2 SV=1	27	8	9	8	40.4	Kera	255120	427115	245367	79723.2	34985.9	57070.7	625660	6.92648e+06
High	Master Protein	P16332	Methylmalonyl-CoA mutase, mitochondrial OS=Mus musculus OX=10090 GN=Mmut PE=1 SV=2	12	6	9	6	82.8	Mut	29434.1	18384.4		19770.3	48856.7	120324	1.50466e+06	1.1796e+06
High	Master Protein	Q9DC61	Mitochondrial-processing peptidase subunit alpha OS=Mus musculus OX=10090 GN=Pmpca PE=1 SV=1	19	7	9	7	58.2	Pmpca	90047.1	33595.8	20771.9	95555		122880	3.24834e+06	2.45664e+06
High	Master Protein	Q9ERS2	NADH dehydrogenase [ubiquinone] 1 alpha subcomplex subunit 13 OS=Mus musculus OX=10090 GN=Ndufa13 PE=1 SV=3	30	4	9	4	16.8	Ndufa13	64025.1	21561.4	26504.3	8523.41	32631.7	183242	2.25652e+06	3.4592e+06
High	Master Protein	Q61578	NADPH:adrenodoxin oxidoreductase, mitochondrial OS=Mus musculus OX=10090 GN=Fdxr PE=1 SV=1	7	4	9	4	54.2	Fdxr	37640.5	85655.7	65846		196299	215834	1.36734e+06	875605
High	Master Protein	P70670	Nascent polypeptide-associated complex subunit alpha, muscle-specific form OS=Mus musculus OX=10090 GN=Naca PE=1 SV=2	3	4	9	4	220.4	Naca	171564	73052.8	71926.4	104987	383928	211837	254959	644196
High	Master Protein	P57716	Nicastrin OS=Mus musculus OX=10090 GN=Ncstn PE=1 SV=3	9	6	9	6	78.4	Ncstn			16536.1		21785.3	16137	4.39279e+06	2.44864e+06
High	Master Protein	O35685	Nuclear migration protein nudC OS=Mus musculus OX=10090 GN=Nudc PE=1 SV=1	15	4	9	4	38.3	Nudc	161316	93929.1	21254.6	20443.8	354253	382761	3.59315e+06	1.05236e+06
High	Master Protein	P60670	Nuclear protein localization protein 4 homolog OS=Mus musculus OX=10090 GN=Nploc4 PE=1 SV=3	18	6	9	6	68	Nploc4		60626.8	60352.5	11689.2	32710.9	82349.7	1.428e+06	731742
High	Master Protein	O35103	Osteomodulin OS=Mus musculus OX=10090 GN=Omd PE=2 SV=1	14	5	9	5	49.7	Omd		5968.25				9936.71	4.40404e+06	4.06521e+06
High	Master Protein	O08807	Peroxiredoxin-4 OS=Mus musculus OX=10090 GN=Prdx4 PE=1 SV=1	11	4	9	2	31	Prdx4	96560.8	43183.1	27002		165983	266013	1.96272e+06	1.32037e+06
High	Master Protein	A0A140LHQ8	Phosphatidylinositol-binding clathrin assembly protein (Fragment) OS=Mus musculus OX=10090 GN=Picalm PE=1 SV=1	22	5	9	1	57	Picalm							621039	177571
Medium	Master Protein	Q8BWJ3	Phosphorylase b kinase regulatory subunit alpha, liver isoform OS=Mus musculus OX=10090 GN=Phka2 PE=1 SV=1	1	1	9	1	138.4	Phka2	437354	10285.1	564763		361258	1.34919e+06	33247.5	44619.5
High	Master Protein	Q9CWT6	Probable ATP-dependent RNA helicase DDX28 OS=Mus musculus OX=10090 GN=Ddx28 PE=2 SV=2	16	6	9	6	59.5	Ddx28	360688	324119	472233		541448	340681	6.99916e+06	1.66109e+06
High	Master Protein	Q9R1P0	Proteasome subunit alpha type-4 OS=Mus musculus OX=10090 GN=Psma4 PE=1 SV=1	26	6	9	6	29.5	Psma4	256314	138759	19823.3		220542	825409	1.25776e+07	1.00352e+07
High	Master Protein	O55234	Proteasome subunit beta type-5 OS=Mus musculus OX=10090 GN=Psmb5 PE=1 SV=3	17	4	9	4	28.5	Psmb5	156545	78575.8	37373.6		67550	382364	3.96857e+06	3.22772e+06
High	Master Protein	Q9CQS8	Protein transport protein Sec61 subunit beta OS=Mus musculus OX=10090 GN=Sec61b PE=1 SV=3	39	3	9	3	10	Sec61b	193957	140296	104208		358135	1.03055e+06	1.0747e+07	1.02123e+07
High	Master Protein	Q9CQD1	Ras-related protein Rab-5A OS=Mus musculus OX=10090 GN=Rab5a PE=1 SV=1	27	5	9	3	23.6	Rab5a							2.28047e+06	1922469
High	Master Protein	P61021	Ras-related protein Rab-5B OS=Mus musculus OX=10090 GN=Rab5b PE=1 SV=1	22	4	9	2	23.7	Rab5b	16630	12550	8298.53			8425.28	571001	259994
High	Master Protein	P97347	Repetin OS=Mus musculus OX=10090 GN=Rptn PE=2 SV=2	9	4	9	4	128.5	Rptn	36052.5					214468	1.05171e+07	2367041
High	Master Protein	Q9CPN9	RIKEN cDNA 2210010C04 gene OS=Mus musculus OX=10090 GN=2210010C04Rik PE=1 SV=1	5	1	9	1	26.4	2210010C04Rik	252047	154851	230998	227498	325319	236951	411487	422242
High	Master Protein	Q8BG13	RNA-binding protein 3 OS=Mus musculus OX=10090 GN=Rbm3 PE=1 SV=1	56	5	9	5	16.8	Rbm3	25989.1			13604.7	37882.3	32033.8	2.33078e+06	2579274
High	Master Protein	Q7TQ48	Sarcalumenin OS=Mus musculus OX=10090 GN=Srl PE=1 SV=2	16	5	9	5	54.3		61935.5		23270	7263.14		51040.2	341790	3.75411e+06
High	Master Protein	G3X972	Sec24-related gene family, member C (S. cerevisiae) OS=Mus musculus OX=10090 GN=Sec24c PE=1 SV=1	9	7	9	7	118.5	Sec24c		154496	86994.3		52425.8	42414	3.33235e+06	1.37039e+06
High	Master Protein	Q8BH69	Selenide, water dikinase 1 OS=Mus musculus OX=10090 GN=Sephs1 PE=1 SV=1	20	5	9	5	42.9	Sephs1		76099.7	13967.1			50932.6	1.15659e+06	969405
High	Master Protein	P62137	Serine/threonine-protein phosphatase PP1-alpha catalytic subunit OS=Mus musculus OX=10090 GN=Ppp1ca PE=1 SV=1	9	3	9	1	37.5	Ppp1ca	83636.7	39569.6			104759	127883	1530843	1.22632e+06
High	Master Protein	P17809	Solute carrier family 2, facilitated glucose transporter member 1 OS=Mus musculus OX=10090 GN=Slc2a1 PE=1 SV=4	4	2	9	2	53.9	Slc2a1	739734	395792	516973	154348	573590	801074
High	Master Protein	Q78ZM0	Sorting nexin-3 OS=Mus musculus OX=10090 GN=Snx3 PE=1 SV=1	39	6	9	5	18.8	Snx3	58733.8	31694.8	46210.2		96223.1	157897	1.06722e+07	6.14642e+06
High	Master Protein	P09671	Superoxide dismutase [Mn], mitochondrial OS=Mus musculus OX=10090 GN=Sod2 PE=1 SV=3	23	3	9	3	24.6	Sod2	47295					89736.9	2.25109e+06	2.21122e+06
High	Master Protein	Q8C176	Transcription initiation factor TFIID subunit 2 OS=Mus musculus OX=10090 GN=Taf2 PE=2 SV=2	5	5	9	5	126.9	Taf2	373403	265698	468050	402143	378621	556900	375265	295197
High	Master Protein	Q9R099	Transducin beta-like protein 2 OS=Mus musculus OX=10090 GN=Tbl2 PE=1 SV=2	19	6	9	6	49.6	Tbl2	22947.4				50701.4	93918.7	4.42361e+06	2.25397e+06
High	Master Protein	Q99KF1	Transmembrane emp24 domain-containing protein 9 OS=Mus musculus OX=10090 GN=Tmed9 PE=1 SV=2	16	5	9	5	27.1	Tmed9	72304.5	106109	80431.7	559882	117007	718139	1.01174e+07	9.50973e+06
High	Master Protein	Q64514	Tripeptidyl-peptidase 2 OS=Mus musculus OX=10090 GN=Tpp2 PE=1 SV=3	7	7	9	7	139.8	Tpp2	104030	81143.9	89043.2	46175.4	159029	265462	3.85324e+06	1.14468e+06
High	Master Protein	P61089	Ubiquitin-conjugating enzyme E2 N OS=Mus musculus OX=10090 GN=Ube2n PE=1 SV=1	35	4	9	4	17.1	Ube2n	90194.8	49243.3	36223.5	5089.32	145436	229711	3.76202e+06	3.21731e+06
High	Master Protein	Q9WTI7	Unconventional myosin-Ic OS=Mus musculus OX=10090 GN=Myo1c PE=1 SV=2	8	7	9	7	121.9	Myo1c	1.06616e+06	734421	806131		841241	1.13953e+06	4.49403e+06	2.13023e+06
High	Master Protein	E9Q1X8	Voltage-dependent calcium channel subunit alpha-2/delta-1 OS=Mus musculus OX=10090 GN=Cacna2d1 PE=1 SV=2	9	8	9	8	123.1		156375	327908	152839		42211	26856.8	2.90942e+06	2.11738e+06
High	Master Protein	O35226	26S proteasome non-ATPase regulatory subunit 4 OS=Mus musculus OX=10090 GN=Psmd4 PE=1 SV=1	23	6	8	4	40.7	Psmd4		80163.9	93034.2	7283.42	28618.5	116744	7.95662e+06	2.07545e+06
High	Master Protein	P67984	60S ribosomal protein L22 OS=Mus musculus OX=10090 GN=Rpl22 PE=1 SV=2	23	3	8	3	14.8	Rpl22; LOC100047372; LOC100504863; LOC102642602	1.42637e+06	885741	383013	16821.8	2.23017e+06	2.08958e+06	484966	207355
High	Master Protein	P47962	60S ribosomal protein L5 OS=Mus musculus OX=10090 GN=Rpl5 PE=1 SV=3	14	4	8	4	34.4	Rpl5	283972	34780.2	24843.6	9883.62	480138	518747	2.47367e+06	496915
High	Master Protein	Q9WV54	Acid ceramidase OS=Mus musculus OX=10090 GN=Asah1 PE=1 SV=1	22	6	8	6	44.6	Asah1	11931.7	21077.4	72136.6		58100.3	56219.2	1.01257e+06	781163
High	Master Protein	O55137	Acyl-coenzyme A thioesterase 1 OS=Mus musculus OX=10090 GN=Acot1 PE=1 SV=1	12	4	8	1	46.1	Acot1							90777.8	77171.9
High	Master Protein	Q3TGS9	ADP-ribosylation factor GTPase-activating protein 1 OS=Mus musculus OX=10090 GN=Arfgap1 PE=1 SV=1	8	3	8	3	43.2	Arfgap1	19626.8	27628.4	87004.3	64255.8	8442.61	79158.8	1.12352e+06	396133
High	Master Protein	Q8JZQ2	AFG3-like protein 2 OS=Mus musculus OX=10090 GN=Afg3l2 PE=1 SV=1	7	6	8	4	89.5	Afg3l2	276456	237212	220532		239607	548301	6.63726e+06	2.95048e+06
High	Master Protein	Q9QYC0	Alpha-adducin OS=Mus musculus OX=10090 GN=Add1 PE=1 SV=2	10	5	8	5	80.6	Add1	149620	106379	61216.8		278474	289343	3.53733e+06	1.0485e+06
High	Master Protein	A0A5F8MPW1	Angiotensin 1-10 OS=Mus musculus OX=10090 GN=Agt PE=1 SV=1	14	4	8	4	52							41734.7	1.28437e+06	527032
High	Master Protein	Q06185	ATP synthase subunit e, mitochondrial OS=Mus musculus OX=10090 GN=Atp5me PE=1 SV=2	68	5	8	5	8.2	Atp5k	447193	360023	85229.8	13662.2	933382	1.29937e+06	4.99652e+06	7.16775e+06
High	Master Protein	P12382	ATP-dependent 6-phosphofructokinase, liver type OS=Mus musculus OX=10090 GN=Pfkl PE=1 SV=4	8	6	8	4	85.3	Pfkl	830271	398883	612510		786266	1269809	2.09326e+06	1.42781e+06
High	Master Protein	O70318	Band 4.1-like protein 2 OS=Mus musculus OX=10090 GN=Epb41l2 PE=1 SV=2	9	5	8	5	109.9	Epb4.1l2; Epb41l2	74511.8	57241.7	70307.8		68087.1	58029.4	2.14112e+06	851532
High	Master Protein	P15116	Cadherin-2 OS=Mus musculus OX=10090 GN=Cdh2 PE=1 SV=2	11	5	8	5	99.7	Cdh2	2.06427e+06	3.36087e+06	4734145		6.43765e+06	5.79473e+06	650502	427761
High	Master Protein	O88456	Calpain small subunit 1 OS=Mus musculus OX=10090 GN=Capns1 PE=1 SV=1	31	6	8	6	28.4	Capns1	137078	137730			95097.1	159652	2082365	1.85441e+06
High	Master Protein	O35646	Calpain-6 OS=Mus musculus OX=10090 GN=Capn6 PE=1 SV=2	7	4	8	4	74.5	Capn6	430438	467232	514855	439766	625015	494784	83415.2
High	Master Protein	Q8CCK0	Core histone macro-H2A.2 OS=Mus musculus OX=10090 GN=Macroh2a2 PE=1 SV=3	23	6	8	4	40.1	H2afy2	48342.4	48384.4	137761		26971.9	91393.4	2.15516e+06	1.25622e+06
High	Master Protein	P97315	Cysteine and glycine-rich protein 1 OS=Mus musculus OX=10090 GN=Csrp1 PE=1 SV=3	33	4	8	4	20.6	Csrp1	33747.9	20638.3	37914.5	71222.2	16192.3	412663	2.02295e+07	2.66282e+06
High	Master Protein	Q8K3H0	DCC-interacting protein 13-alpha OS=Mus musculus OX=10090 GN=Appl1 PE=1 SV=1	14	6	8	6	79.3	Appl1	61649.6	90834.4	53551.9	46077.2	75366.4	157326	4.75621e+06	594611
High	Master Protein	O35459	Delta(3,5)-Delta(2,4)-dienoyl-CoA isomerase, mitochondrial OS=Mus musculus OX=10090 GN=Ech1 PE=1 SV=1	20	5	8	5	36.1	Ech1			70303.2			26861.6	830708	1.13137e+06
High	Master Protein	Q3ULG5	DNA helicase OS=Mus musculus OX=10090 GN=Mcm6 PE=1 SV=1	6	4	8	4	89.7	Mcm6	260738	118620	179047	16192.7	280457	694262	1.79982e+06	604980
High	Master Protein	O70152	Dolichol-phosphate mannosyltransferase subunit 1 OS=Mus musculus OX=10090 GN=Dpm1 PE=1 SV=1	27	5	8	5	29.2	Dpm1	383468	220605	27748.4	42770	381925	740949	3.9005e+06	1.38171e+06
High	Master Protein	A0A3B2WB50	EMILIN-2 OS=Mus musculus OX=10090 GN=Emilin2 PE=1 SV=1	9	6	8	6	108.4		80827	11747.4	33207.4	77410.7	18802.4	89286	2.14516e+06	1.20782e+06
High	Master Protein	Q60902	Epidermal growth factor receptor substrate 15-like 1 OS=Mus musculus OX=10090 GN=Eps15l1 PE=1 SV=3	13	8	8	8	99.2	Eps15l1	2.6814e+06	4.12091e+06	3.08271e+06	9.03067e+06	2.25865e+06	2.47547e+06	1.57201e+06	600357
High	Master Protein	Q9QZD9	Eukaryotic translation initiation factor 3 subunit I OS=Mus musculus OX=10090 GN=Eif3i PE=1 SV=1	15	4	8	4	36.4	Eif3i	10313266	8.99651e+06	7647959		1.62151e+07	1.47685e+07	1.10879e+07	8.70616e+06
High	Master Protein	E9Q9E1	Eukaryotic translation initiation factor 4 gamma 1 OS=Mus musculus OX=10090 GN=Eif4g1 PE=1 SV=1	4	5	8	5	175.2	Eif4g1	283424	114985	152219		258791	352054	613486	74372
High	Master Protein	O55135	Eukaryotic translation initiation factor 6 OS=Mus musculus OX=10090 GN=Eif6 PE=1 SV=2	14	2	8	2	26.5	Eif6	140941	145367	31703		182862	227206	1.34958e+06	542598
High	Master Protein	Q9ET01	Glycogen phosphorylase, liver form OS=Mus musculus OX=10090 GN=Pygl PE=1 SV=4	4	4	8	1	97.4	Pygl							274109	32590.6
High	Master Protein	Q9QYE6	Golgin subfamily A member 5 OS=Mus musculus OX=10090 GN=Golga5 PE=1 SV=2	12	7	8	7	82.3	Golga5	14490.1	27311.4	11698.7		28097.9	80221.9	2.94298e+06	1.46103e+06
High	Master Protein	P21279	Guanine nucleotide-binding protein G(q) subunit alpha OS=Mus musculus OX=10090 GN=Gnaq PE=1 SV=4	21	6	8	6	42.1	Gnaq		63981.3	152291	50679.2	117620	51612.2	1.88903e+06	2.02615e+06
High	Master Protein	A0A075B5Y1	Immunoglobulin heavy variable V1-74 OS=Mus musculus OX=10090 GN=Ighv1-74 PE=4 SV=1	16	2	8	1	12.9		230013		32306.4		62918.7	251556
High	Master Protein	Q9Z1R2	Large proline-rich protein BAG6 OS=Mus musculus OX=10090 GN=Bag6 PE=1 SV=1	9	6	8	6	121	Bag6			18568.8			31867.8	2.86641e+06	712379
High	Master Protein	A2A6H0	LIM and SH3 domain protein 1 (Fragment) OS=Mus musculus OX=10090 GN=Lasp1 PE=1 SV=1	28	5	8	5	21.3	Lasp1	97453.4	35723.4	29337.2		80679.5	264951	5.40776e+06	4.01169e+06
High	Master Protein	Q8VCF0	Mitochondrial antiviral-signaling protein OS=Mus musculus OX=10090 GN=Mavs PE=1 SV=1	25	6	8	6	53.4	Mavs	85302.4		38853.9			7439.38	2.14622e+06	920481
High	Master Protein	G3X9U9	Mitochondrial fission 1 protein OS=Mus musculus OX=10090 GN=Fis1 PE=1 SV=1	26	3	8	3	16.3	Fis1	4787.9				13812.1	54623	1.82606e+06	1.91462e+06
High	Master Protein	Q8JZN7	Mitochondrial Rho GTPase 2 OS=Mus musculus OX=10090 GN=Rhot2 PE=1 SV=1	13	6	8	4	69	Rhot2	168791		72568.7		78705.4	217967	1.57057e+06	859252
High	Master Protein	A0A140LHA2	Mitotic checkpoint protein BUB3 OS=Mus musculus OX=10090 GN=Bub3 PE=1 SV=1	16	5	8	5	36.7		175779	147865	61081.1		2.09233e+06	304720	2.33685e+06	1.4252e+06
High	Master Protein	P97434	Myosin phosphatase Rho-interacting protein OS=Mus musculus OX=10090 GN=Mprip PE=1 SV=2	11	7	8	7	116.3	Mprip				8509.83	25124.5		2.55879e+06	458993
High	Master Protein	Q99LD8	N(G),N(G)-dimethylarginine dimethylaminohydrolase 2 OS=Mus musculus OX=10090 GN=Ddah2 PE=1 SV=1	35	6	8	5	29.6	Ddah2	68956	24811.7	11864.1		71254.8	109119	2.57216e+06	1.97378e+06
High	Master Protein	Q7TMF3	NADH dehydrogenase [ubiquinone] 1 alpha subcomplex subunit 12 OS=Mus musculus OX=10090 GN=Ndufa12 PE=1 SV=2	32	5	8	5	17.1	Ndufa12	42251.8	24303.8	35715.9		55783.3	137048	2.18522e+06	3.94831e+06
High	Master Protein	P51660	Peroxisomal multifunctional enzyme type 2 OS=Mus musculus OX=10090 GN=Hsd17b4 PE=1 SV=3	7	4	8	4	79.4	Hsd17b4	174133	106494	84270.9		140806	228901	843551	953119
High	Master Protein	G5DDB7	Phosphoinositide phospholipase C OS=Mus musculus OX=10090 GN=Plcd1 PE=1 SV=1	15	8	8	8	88.8	Plcd1	22738.3		31016.8		14940.9	81534.1	2.81455e+06	314819
High	Master Protein	P05622	Platelet-derived growth factor receptor beta OS=Mus musculus OX=10090 GN=Pdgfrb PE=1 SV=2	5	4	8	3	122.7			14791				47342.2	683141	417960
High	Master Protein	Q9R1P3	Proteasome subunit beta type-2 OS=Mus musculus OX=10090 GN=Psmb2 PE=1 SV=1	25	4	8	4	22.9	Psmb2	65122.3	25932.8	16219.6		94572.9	202056	2.92229e+06	2.54626e+06
High	Master Protein	Q810B6	Rabankyrin-5 OS=Mus musculus OX=10090 GN=Ankfy1 PE=1 SV=2	7	6	8	6	128.6	Ankfy1		45988.2	32112.2		7322.05	38899.1	1.24098e+06	461990
High	Master Protein	P61027	Ras-related protein Rab-10 OS=Mus musculus OX=10090 GN=Rab10 PE=1 SV=1	26	5	8	3	22.5	Rab10	59093.9	36032.4			66852.9	135614	1.72259e+06	1.55009e+06
High	Master Protein	P35293	Ras-related protein Rab-18 OS=Mus musculus OX=10090 GN=Rab18 PE=1 SV=2	37	6	8	6	23	Rab18	227519	82368.3	24182.9	11173.1	246461	321284	1.25627e+06	1.4311e+06
High	Master Protein	Q60838	Segment polarity protein dishevelled homolog DVL-2 OS=Mus musculus OX=10090 GN=Dvl2 PE=1 SV=2	5	3	8	3	78.8	Dvl2	123378	80071.1	153035		215531	272279	61449.1
High	Master Protein	Q64105	Sepiapterin reductase OS=Mus musculus OX=10090 GN=Spr PE=1 SV=1	32	6	8	6	27.9	Spr						131002	2.74591e+06	2.24282e+06
High	Master Protein	Q61036	Serine/threonine-protein kinase PAK 3 OS=Mus musculus OX=10090 GN=Pak3 PE=1 SV=2	9	5	8	1	62.4	Pak3							220948	47597.3
High	Master Protein	P70124	Serpin B5 OS=Mus musculus OX=10090 GN=Serpinb5 PE=1 SV=1	30	8	8	8	42.1	Serpinb5	20858.2		19124.6	13618.5	8612.92	70991.2	2.64403e+06	410647
High	Master Protein	P62315	Small nuclear ribonucleoprotein Sm D1 OS=Mus musculus OX=10090 GN=Snrpd1 PE=1 SV=1	28	2	8	2	13.3	Snrpd1	20816.8					117989	1657602	1.03297e+06
High	Master Protein	P62320	Small nuclear ribonucleoprotein Sm D3 OS=Mus musculus OX=10090 GN=Snrpd3 PE=1 SV=1	15	2	8	2	13.9	Snrpd3	172597	49010	57497.7		132777	362687	2.88177e+06	2.12062e+06
High	Master Protein	G5E866	Splicing factor 3B subunit 1 OS=Mus musculus OX=10090 GN=Sf3b1 PE=1 SV=1	6	5	8	5	145.7	Sf3b1	127545	63640.8	97560.2		211790	452975	2.2437e+06	527468
High	Master Protein	Q80X82	Symplekin OS=Mus musculus OX=10090 GN=Sympk PE=1 SV=2	6	5	8	5	142.5				25064.8	32915.6	21104.7	111803	1.84152e+06	907304
High	Master Protein	Q3UDC3	Target of Myb protein 1 OS=Mus musculus OX=10090 GN=Tom1 PE=1 SV=1	16	5	8	5	57.1	Tom1				9402.7		9645.74	1.57734e+06	503049
High	Master Protein	P20108	Thioredoxin-dependent peroxide reductase, mitochondrial OS=Mus musculus OX=10090 GN=Prdx3 PE=1 SV=1	14	3	8	3	28.1	Prdx3		8461.85				215545	2672965	3.62329e+06
High	Master Protein	Q569Z6	Thyroid hormone receptor-associated protein 3 OS=Mus musculus OX=10090 GN=Thrap3 PE=1 SV=1	5	5	8	5	108.1	Thrap3	786661	141995	292046	5591.99	456412	344451	795647	231710
High	Master Protein	O89090	Transcription factor Sp1 OS=Mus musculus OX=10090 GN=Sp1 PE=1 SV=2	6	2	8	2	80.7	Sp1	267710	177462	256030		261816	301288	138800
High	Master Protein	Q8BI84	Transport and Golgi organization protein 1 homolog OS=Mus musculus OX=10090 GN=Mia3 PE=1 SV=2	5	7	8	4	213.5	Mia3	220800	280106	29122.4		108143	109706	3.52843e+06	1.67625e+06
High	Master Protein	O89023	Tripeptidyl-peptidase 1 OS=Mus musculus OX=10090 GN=Tpp1 PE=1 SV=2	10	4	8	4	61.3	Tpp1	72914.4	45142.5	21868.8	9521.89	81223.6	253138	1.27959e+07	5.61014e+06
High	Master Protein	Q62189	U1 small nuclear ribonucleoprotein A OS=Mus musculus OX=10090 GN=Snrpa PE=1 SV=3	25	5	8	5	31.8	Snrpa	64450.1	39460	13683.5	38175.4	154237	157512	2.96229e+06	2.14421e+06
High	Master Protein	A0A0A0MQ80	Vesicle-fusing ATPase OS=Mus musculus OX=10090 GN=Spata5 PE=1 SV=1	4	3	8	2	97.1	Spata5	45099.3		91563.8			64916.8	218688
High	Master Protein	Q922H2	[Pyruvate dehydrogenase (acetyl-transferring)] kinase isozyme 3, mitochondrial OS=Mus musculus OX=10090 GN=Pdk3 PE=1 SV=1	14	5	7	5	47.9	Pdk3	319689	251804	78441.5		460834	400531	3.32003e+06	2.00171e+06
High	Master Protein	A2AJQ0	[Pyruvate dehydrogenase [acetyl-transferring]]-phosphatase 1, mitochondrial OS=Mus musculus OX=10090 GN=Pdp1 PE=1 SV=2	9	4	7	4	67.6	Pdp1	129761		70025.4			299749	738931	619601
High	Master Protein	O08848	60 kDa SS-A/Ro ribonucleoprotein OS=Mus musculus OX=10090 GN=RO60 PE=1 SV=1	4	2	7	2	60.1	Trove2	14676.6	12056.6				100412	678579	371670
High	Master Protein	Q8BK64	Activator of 90 kDa heat shock protein ATPase homolog 1 OS=Mus musculus OX=10090 GN=Ahsa1 PE=1 SV=2	9	2	7	2	38.1	Ahsa1	100749	19977.3	16847.5		303479	94816.5	897854	454555
High	Master Protein	A0A0R4J0T8	ADP-ribosylation factor GTPase-activating protein 3 OS=Mus musculus OX=10090 GN=Arfgap3 PE=1 SV=1	12	6	7	6	57.5	Arfgap3	47825.9	122358	81926.1	12818.6	30576.8	127553	2.36463e+06	960791
High	Master Protein	Q9EP71	Ankycorbin OS=Mus musculus OX=10090 GN=Rai14 PE=1 SV=1	8	6	7	6	108.8	Rai14	203904	109695	89058.8		216000	444450	3.75636e+06	2.31265e+06
High	Master Protein	Q9QYB1	Chloride intracellular channel protein 4 OS=Mus musculus OX=10090 GN=Clic4 PE=1 SV=3	13	3	7	2	28.7	Clic4	44778.9				61472.3	755086	1.31679e+06	635283
High	Master Protein	O89079	Coatomer subunit epsilon OS=Mus musculus OX=10090 GN=Cope PE=1 SV=3	18	3	7	3	34.5	Cope				39660.7		78504.7	1.28867e+06	1.14374e+06
High	Master Protein	Q9Z160	Conserved oligomeric Golgi complex subunit 1 OS=Mus musculus OX=10090 GN=Cog1 PE=1 SV=3	6	5	7	5	109	Cog1	252653	144041	22771.3	221715	16339	27611.3	1.69294e+06	249252
High	Master Protein	Q8C0L8	Conserved oligomeric Golgi complex subunit 5 OS=Mus musculus OX=10090 GN=Cog5 PE=1 SV=3	8	5	7	5	91.3	Cog5		67184.1	46607.4		66069.5	57977.6	1.85992e+06	722654
High	Master Protein	P55292	Desmocollin-2 OS=Mus musculus OX=10090 GN=Dsc2 PE=1 SV=1	8	6	7	6	99.9	Dsc2		59151.8	51277.1		87277.9		5.07881e+06	567874
High	Master Protein	P61804	Dolichyl-diphosphooligosaccharide--protein glycosyltransferase subunit DAD1 OS=Mus musculus OX=10090 GN=Dad1 PE=1 SV=3	29	3	7	3	12.5	Dad1	157061	26464.5	136048		138713	348876	3.03065e+06	2.9058e+06
High	Master Protein	E9Q3F3	EGF-containing fibulin-like extracellular matrix protein 2 (Fragment) OS=Mus musculus OX=10090 GN=Efemp2 PE=1 SV=1	20	4	7	4	31.6		197258	99507.1	120498		196031	195514	3.67128e+06	2.03521e+06
High	Master Protein	Q91V98	Endosialin OS=Mus musculus OX=10090 GN=Cd248 PE=1 SV=1	6	4	7	4	81.8	Cd248	29226.8	22167.2	36981.7	31046		44724.7	2.55352e+06	1.43079e+06
High	Master Protein	Q8BPU7	Engulfment and cell motility protein 1 OS=Mus musculus OX=10090 GN=Elmo1 PE=1 SV=2	10	6	7	6	83.9	Elmo1				13464.8	10368.1	30051.8	2.14116e+06	837467
High	Master Protein	Q6ZWX6	Eukaryotic translation initiation factor 2 subunit 1 OS=Mus musculus OX=10090 GN=Eif2s1 PE=1 SV=3	10	3	7	3	36.1	Eif2s1	395835	243895	31413.9	5357.09	725014	355416	1.50168e+06	467656
High	Master Protein	P16406	Glutamyl aminopeptidase OS=Mus musculus OX=10090 GN=Enpep PE=1 SV=1	8	6	7	6	107.9	Enpep	536782	92932	429286	13130.1	513038	761418	3.29017e+06	810341
High	Master Protein	Q9CQM9	Glutaredoxin-3 OS=Mus musculus OX=10090 GN=Glrx3 PE=1 SV=1	14	4	7	4	37.8	Glrx3	42572.9	9916.33	17718.1	1.68173e+06	71892	129194	2.95571e+06	1.94085e+06
High	Master Protein	Q60928	Glutathione hydrolase 1 proenzyme OS=Mus musculus OX=10090 GN=Ggt1 PE=1 SV=1	11	6	7	6	61.5	Ggt1		32447			66493.1	52057.8	1.95149e+06	3.42624e+06
High	Master Protein	Q9DC51	Guanine nucleotide-binding protein G(i) subunit alpha OS=Mus musculus OX=10090 GN=Gnai3 PE=1 SV=3	13	4	7	1	40.5	Gnai3	39168.2					32587.7	394798	284774
High	Master Protein	H3BK24	Homeobox protein cut-like OS=Mus musculus OX=10090 GN=Cux1 PE=1 SV=2	5	5	7	1	164.4	Cux1	64201.3	10428.3	76456.2	36367.7	6272.96	15237.1	979661	206871
High	Master Protein	P01653	Ig kappa chain V-V region W3082 OS=Mus musculus OX=10090 PE=1 SV=1	15	1	7	1	11.8	Igkv11-125	333937	237526	48137.1		39331.2	872574	54089.1
High	Master Protein	A0A075B5U5	Immunoglobulin heavy variable V1-19 OS=Mus musculus OX=10090 GN=Ighv1-19 PE=1 SV=1	41	2	7	1	12.8		731029	351139	161156	168350		1.14047e+06
High	Master Protein	A0A140T8P3	Immunoglobulin kappa chain variable 15-103 (Fragment) OS=Mus musculus OX=10090 GN=Igkv15-103 PE=4 SV=2	10	1	7	1	12.5	Igkv15-103	572090	305978	106134		796992	631777		243961
High	Master Protein	Q9D819	Inorganic pyrophosphatase OS=Mus musculus OX=10090 GN=Ppa1 PE=1 SV=1	21	6	7	6	32.6	Ppa1	525684	42975	470637	71882.2	187076	714008	2.881e+06	2.35188e+06
High	Master Protein	P11688	Integrin alpha-5 OS=Mus musculus OX=10090 GN=Itga5 PE=1 SV=3	7	5	7	5	115	Itga5	20627.7	16272.9	26800.4		76085.4	33063	1.84901e+06	1.24857e+06
High	Master Protein	Q9DBS5	Kinesin light chain 4 OS=Mus musculus OX=10090 GN=Klc4 PE=1 SV=1	12	5	7	4	68.6	Klc4	30385.8		25639.2		16615.8	41267.7	1.10826e+06	365093
High	Master Protein	A0A338P699	Kininogen 2 (Fragment) OS=Mus musculus OX=10090 GN=Kng2 PE=1 SV=1	20	3	7	1	15.3		31578.5	12654.9	37034.5	37224	33042.9	165832	10060145	1.87183e+06
High	Master Protein	G5E874	Laminin subunit gamma-2 OS=Mus musculus OX=10090 GN=Lamc2 PE=1 SV=1	6	5	7	5	130.3	Lamc2	33539.3	22754.3	31732.2			31976.1	2.43259e+06	819341
High	Master Protein	Q99M71	Mammalian ependymin-related protein 1 OS=Mus musculus OX=10090 GN=Epdr1 PE=1 SV=1	16	3	7	3	25.5	Epdr1	67828.2	131833	70129		237490	110128	5.71213e+06	4.34203e+06
High	Master Protein	Q922H4	Mannose-1-phosphate guanyltransferase alpha OS=Mus musculus OX=10090 GN=Gmppa PE=1 SV=1	14	5	7	5	46.2	Gmppa		16277.2	11716.8		50431	45634	2.43529e+06	1.86505e+06
High	Master Protein	Q8K009	Mitochondrial 10-formyltetrahydrofolate dehydrogenase OS=Mus musculus OX=10090 GN=Aldh1l2 PE=1 SV=2	10	6	7	6	101.5	Aldh1l2				9598.13			1.221e+06	809344
High	Master Protein	Q9QZD8	Mitochondrial dicarboxylate carrier OS=Mus musculus OX=10090 GN=Slc25a10 PE=1 SV=2	8	1	7	1	31.7	Slc25a10; 0610009L18Rik	40044.9	51463.3	6691.45	44740.9	69548.8	59817.9	22770.5	40120.3
High	Master Protein	Q8BG51	Mitochondrial Rho GTPase 1 OS=Mus musculus OX=10090 GN=Rhot1 PE=1 SV=1	6	4	7	2	72.2	Rhot1	77927.4	60248.9	88675.7	22904.6	98637.1	125405	402651	89329.3
High	Master Protein	P04370	Myelin basic protein OS=Mus musculus OX=10090 GN=Mbp PE=1 SV=2	12	4	7	4	27.2	Mbp	10911.4	33712	47814.2	420370	48301.3	222935	1.05451e+07	6.57676e+06
High	Master Protein	Q9DC50	Peroxisomal carnitine O-octanoyltransferase OS=Mus musculus OX=10090 GN=Crot PE=1 SV=1	11	4	7	4	70.2	Crot	113074	29287.4	64142.3	4.6917e+06	18456.8	163137	874210	376814
High	Master Protein	Q921K2	Poly [ADP-ribose] polymerase OS=Mus musculus OX=10090 GN=Parp1 PE=1 SV=1	7	6	7	6	112.7	Parp1	230817	183127	176243	10175.6	322038	368682	1.77658e+06	150299
High	Master Protein	P22437	Prostaglandin G/H synthase 1 OS=Mus musculus OX=10090 GN=Ptgs1 PE=1 SV=1	6	3	7	3	69	Ptgs1	119515	73447.8	66351.9		198501	213141	422331	203562
High	Master Protein	Q9JKV1	Proteasomal ubiquitin receptor ADRM1 OS=Mus musculus OX=10090 GN=Adrm1 PE=1 SV=2	9	3	7	3	42	Adrm1	90611.7	110002	77246.9		84075.4	144896	3.26425e+06	1.35989e+06
High	Master Protein	Q8BXZ1	Protein disulfide-isomerase TMX3 OS=Mus musculus OX=10090 GN=Tmx3 PE=1 SV=2	12	4	7	4	51.8	Tmx3	132976	84255.2	96761		146032	274295	4.99271e+06	2.08484e+06
High	Master Protein	Q80TL7	Protein MON2 homolog OS=Mus musculus OX=10090 GN=Mon2 PE=1 SV=2	3	4	7	4	189	Mon2	15188.3	25347.5	32782.6			171588	3.9264e+06	874215
High	Master Protein	P55258	Ras-related protein Rab-8A OS=Mus musculus OX=10090 GN=Rab8a PE=1 SV=2	27	5	7	3	23.7	Rab8a					9020.75		64780.7	51251.1
High	Master Protein	Q9CQE8	RNA transcription, translation and transport factor protein OS=Mus musculus OX=10090 GN=RTRAF PE=1 SV=1	25	4	7	4	28.1	2700060E02Rik; Rtraf	107047	172481	56439.4	45231.4		85021	882957	644997
High	Master Protein	P58389	Serine/threonine-protein phosphatase 2A activator OS=Mus musculus OX=10090 GN=Ptpa PE=1 SV=1	20	4	7	4	36.7	Ppp2r4; Ptpa				181559	32250.7	14175.4	1.01869e+06	842272
High	Master Protein	P62141	Serine/threonine-protein phosphatase PP1-beta catalytic subunit OS=Mus musculus OX=10090 GN=Ppp1cb PE=1 SV=3	17	5	7	2	37.2	Ppp1cb	35629.1	15997.7	82672.7	48925.2	575469	185682	2.46324e+06	1.92194e+06
High	Master Protein	P63087	Serine/threonine-protein phosphatase PP1-gamma catalytic subunit OS=Mus musculus OX=10090 GN=Ppp1cc PE=1 SV=1	14	4	7	1	37	Ppp1cc; Gm5601			30942.3		33423.8	36551.8		224083
High	Master Protein	A2AAY5	SH3 and PX domain-containing protein 2B OS=Mus musculus OX=10090 GN=Sh3pxd2b PE=1 SV=1	7	5	7	3	101.5	Sh3pxd2b	161873	75037.7	58448.1			277732	3.62713e+06	1.7353e+06
High	Master Protein	Q99J77	Sialic acid synthase OS=Mus musculus OX=10090 GN=Nans PE=1 SV=1	14	4	7	4	40	Nans	11195.1	11515	3648.26		15362.2	43809.2	2.08254e+06	739049
High	Master Protein	P14576	Signal recognition particle 54 kDa protein OS=Mus musculus OX=10090 GN=Srp54 PE=1 SV=2	17	7	7	7	55.7	Srp54a; Srp54b	84206.8	47388.7	87182.7	417352	135031	306084	4.62917e+06	1.11755e+06
High	Master Protein	P47758	Signal recognition particle receptor subunit beta OS=Mus musculus OX=10090 GN=Srprb PE=1 SV=1	29	6	7	6	29.6	Srprb	268558	260265	112484		474455	469125	2.23918e+06	2.06613e+06
High	Master Protein	Q8BMA6	Signal recognition particle subunit SRP68 OS=Mus musculus OX=10090 GN=Srp68 PE=1 SV=2	16	6	7	6	70.5	Srp68	41415.8	95801.6	24843.4	64535.7	119703	51543.6	2.15561e+06	138248
High	Master Protein	A0A286YDB7	Signal sequence receptor subunit alpha (Fragment) OS=Mus musculus OX=10090 GN=Ssr1 PE=1 SV=1	30	3	7	3	13.1		434926	218924	85772.3		670199	677336	2.3181e+06	2.3698e+06
High	Master Protein	Q6P8X1	Sorting nexin-6 OS=Mus musculus OX=10090 GN=Snx6 PE=1 SV=2	14	5	7	4	46.6	Snx6	15477.2	21469.3	13325.1			41365.9	714039	149413
High	Master Protein	D3YW09	Splicing factor 3A subunit 2 OS=Mus musculus OX=10090 GN=Sf3a2 PE=1 SV=1	29	4	7	4	22.1	Sf3a2	101472	33070.4	50852.6		74936.5	149848	2.7186e+06	1.16026e+06
High	Master Protein	Q8R086	Sulfite oxidase, mitochondrial OS=Mus musculus OX=10090 GN=Suox PE=1 SV=2	13	4	7	4	60.7	Suox			15827.2	6669.69	24646.3	24948.7	2.22808e+06	1.24503e+06
High	Master Protein	Q9Z1F9	SUMO-activating enzyme subunit 2 OS=Mus musculus OX=10090 GN=Uba2 PE=1 SV=1	9	5	7	5	70.5	Uba2	111145	85455.4	82373.4		300302	272776	3.767e+06	34382.3
High	Master Protein	Q3UTY6	Thrombospondin type-1 domain-containing protein 4 OS=Mus musculus OX=10090 GN=Thsd4 PE=1 SV=2	5	5	7	5	113.2	Thsd4	127739	411273	160259	4114.62	208705	451477	1.25289e+07	6.75239e+06
High	Master Protein	P63028	Translationally-controlled tumor protein OS=Mus musculus OX=10090 GN=Tpt1 PE=1 SV=1	49	4	7	4	19.5	Tpt1	11224.3	7384.49				126174	5.37465e+06	2.50312e+06
High	Master Protein	Q6P2B1	Transportin-3 OS=Mus musculus OX=10090 GN=Tnpo3 PE=1 SV=1	7	3	7	3	104.1	Tnpo3	115550	39584.8	29976.3			67932.7	485211	55381.1
High	Master Protein	P07309	Transthyretin OS=Mus musculus OX=10090 GN=Ttr PE=1 SV=1	39	3	7	3	15.8	Ttr		73769.2			43904.4	254513	2.41659e+06	2.49001e+06
High	Master Protein	B1ASP2	Tyrosine-protein kinase OS=Mus musculus OX=10090 GN=Jak1 PE=1 SV=1	5	5	7	5	133.3	Jak1	208575	123066	219020		319530	295230	461492	287821
High	Master Protein	P35235	Tyrosine-protein phosphatase non-receptor type 11 OS=Mus musculus OX=10090 GN=Ptpn11 PE=1 SV=3	9	5	7	5	68		22467.4	95077.8	80531.6	22361.6	82697.3	138474	3.74191e+06	1.20335e+06
High	Master Protein	Q6PB44	Tyrosine-protein phosphatase non-receptor type 23 OS=Mus musculus OX=10090 GN=Ptpn23 PE=1 SV=2	4	5	7	5	185.1	Ptpn23	42933.8				91312.7	34826.6	2.26593e+06	650760
High	Master Protein	Q8R317	Ubiquilin-1 OS=Mus musculus OX=10090 GN=Ubqln1 PE=1 SV=1	12	5	7	3	61.9	Ubqln1	180828	222142	127116		21900.1	37647	1.5124e+06	440502
High	Master Protein	Q9QZM0	Ubiquilin-2 OS=Mus musculus OX=10090 GN=Ubqln2 PE=1 SV=2	12	5	7	3	67.3	Ubqln2	55071	58854.8			12355.3	100188	2.90869e+06	1.48019e+06
High	Master Protein	Q8CGY8	UDP-N-acetylglucosamine--peptide N-acetylglucosaminyltransferase 110 kDa subunit OS=Mus musculus OX=10090 GN=Ogt PE=1 SV=2	8	6	7	6	116.9	Ogt	47910.5	76282.3	23117		26703.5		1.84192e+06	882247
High	Master Protein	Q8CGB3	Uveal autoantigen with coiled-coil domains and ankyrin repeats OS=Mus musculus OX=10090 GN=Uaca PE=1 SV=2	5	5	7	5	160.7	Uaca			9685.94			45803	3.48234e+06	910170
High	Master Protein	Q9CZT5	Vasorin OS=Mus musculus OX=10090 GN=Vasn PE=2 SV=2	8	4	7	4	72.2	Vasn		16454.7	71406.4	16542.1			1.35754e+06	681843
High	Master Protein	Q64433	10 kDa heat shock protein, mitochondrial OS=Mus musculus OX=10090 GN=Hspe1 PE=1 SV=2	31	4	6	4	11	Hspe1	61019.3	59547.6	46995.4		81952.3	154111	1.98054e+06	2.14293e+06
High	Master Protein	P58871	182 kDa tankyrase-1-binding protein OS=Mus musculus OX=10090 GN=Tnks1bp1 PE=1 SV=2	4	4	6	4	181.7	Tnks1bp1			12672.8		41216.7	26453.6	2.17656e+06	729303
High	Master Protein	Q5HZH2	18S rRNA aminocarboxypropyltransferase OS=Mus musculus OX=10090 GN=Tsr3 PE=1 SV=1	16	4	6	4	35.3	0610007P22Rik; Tsr3	355391	191220	163366		548408	666356		10842.2
High	Master Protein	P70290	55 kDa erythrocyte membrane protein OS=Mus musculus OX=10090 GN=Mpp1 PE=1 SV=1	11	3	6	3	52.2	Mpp1	14062.6			37437.7	14181	26161.3	598018	497385
High	Master Protein	Q8K010	5-oxoprolinase OS=Mus musculus OX=10090 GN=Oplah PE=1 SV=1	6	5	6	5	137.5	Oplah	10091.8		12145.2		15928.1	20550.5	752418	332576
High	Master Protein	A0A1D5RLW5	60S ribosomal protein L18a OS=Mus musculus OX=10090 GN=Rpl18a PE=1 SV=1	21	3	6	3	17.4		372627	204218	58743.6	60178.6	766518	547350	2.35123e+06	998792
High	Master Protein	Q9D823	60S ribosomal protein L37 OS=Mus musculus OX=10090 GN=Rpl37 PE=3 SV=3	7	2	6	2	11.1	Gm13826; Rpl37rt; Rpl37	3.13341e+06	1.05925e+06	718742		3.01e+06	3.11472e+06	880176
High	Master Protein	P61514	60S ribosomal protein L37a OS=Mus musculus OX=10090 GN=Rpl37a PE=1 SV=2	33	2	6	2	10.3	Rpl37a	143360	36983.1		186420	282609	213834	140819
High	Master Protein	Q9D2R0	Acetoacetyl-CoA synthetase OS=Mus musculus OX=10090 GN=Aacs PE=1 SV=1	5	4	6	4	75.2	Aacs	115033	274490	91709.4		155531	238645	756720	109731
High	Master Protein	E9Q3G5	ADP-ribosylation factor interacting protein 1 OS=Mus musculus OX=10090 GN=Arfip1 PE=1 SV=1	15	4	6	4	40.8		93856.6		26301.1	17125.9	900495	81020.6	2.8349e+06	1.29421e+06
High	Master Protein	Q920A7	AFG3-like protein 1 OS=Mus musculus OX=10090 GN=Afg3l1 PE=1 SV=2	4	4	6	2	87	Afg3l1	7.81649e+06	2.41642e+06	6.08123e+06	5.77472e+07	3.84193e+07	33219404	588276
High	Master Protein	P27046	Alpha-mannosidase 2 OS=Mus musculus OX=10090 GN=Man2a1 PE=1 SV=2	4	4	6	4	131.5	Man2a1	113759	38287.9	93423.1		91111.9	233925	2.13393e+06	358651
Medium	Master Protein	P19091	Androgen receptor OS=Mus musculus OX=10090 GN=Ar PE=1 SV=1	1	1	6	1	98.1	Ar	4.32849e+06	1746392	1701154	5964.38	2.76132e+06	118978	1.69579e+06	4.84589e+06
High	Master Protein	O35639	Annexin A3 OS=Mus musculus OX=10090 GN=Anxa3 PE=1 SV=4	12	4	6	3	36.4	Anxa3	9304.47	40918	7709.04	205244	155416	158189	783127	200144
High	Master Protein	Q8CBB7	AP-1 complex subunit gamma OS=Mus musculus OX=10090 GN=Ap1g1 PE=1 SV=1	6	3	6	3	91.7	Ap1g1	18779.3	16128	15712.9		49921.3	66714.4	3.17706e+06	607768
High	Master Protein	P50428	Arylsulfatase A OS=Mus musculus OX=10090 GN=Arsa PE=1 SV=2	17	4	6	3	53.7	Arsa	111563	80552.5	49767	136083	82170.4		2.96574e+06	1.87646e+06
High	Master Protein	E9Q7E2	AT-rich interactive domain-containing protein 2 OS=Mus musculus OX=10090 GN=Arid2 PE=1 SV=1	1	2	6	2	195.9	Arid2	161758	27429.5	120625		239376	2.28953e+06	1.76083e+08	1.28662e+08
High	Master Protein	Q6P1B9	Bin1 protein OS=Mus musculus OX=10090 GN=Bin1 PE=1 SV=1	12	3	6	3	52.7	Bin1	87234.5	31813.6	131270		132110	87585.5	1.11133e+06	137337
High	Master Protein	Q9WTR5	Cadherin-13 OS=Mus musculus OX=10090 GN=Cdh13 PE=1 SV=2	8	4	6	4	78.1	Cdh13							1.74372e+06	965491
High	Master Protein	O54724	Caveolae-associated protein 1 OS=Mus musculus OX=10090 GN=Cavin1 PE=1 SV=1	10	3	6	3	43.9	Ptrf; Cavin1	284783	121446	172625		345599	319960	938486	599464
High	Master Protein	Q91W92	Cdc42 effector protein 1 OS=Mus musculus OX=10090 GN=Cdc42ep1 PE=1 SV=1	11	3	6	3	43.1	Cdc42ep1	60393.4	101723	83492.7		193967	186399	135074
Low	Master Protein	B2RX82	Cholinergic receptor, nicotinic, alpha polypeptide 10 OS=Mus musculus OX=10090 GN=Chrna10 PE=2 SV=1	2	1	6	1	49.5	Chrna10		16041.2	11940.3	312953	10891	21834.3
High	Master Protein	O35206	Collagen alpha-1(XV) chain OS=Mus musculus OX=10090 GN=Col15a1 PE=1 SV=2	4	4	6	4	140.4	Col15a1				149147			628597	637121
High	Master Protein	A0A1W2P758	Cysteine and glycine-rich protein 2 (Fragment) OS=Mus musculus OX=10090 GN=Csrp2 PE=1 SV=1	26	2	6	2	14.7		22395					171004	3.48556e+06	1.72781e+06
High	Master Protein	Q9CPQ1	Cytochrome c oxidase subunit 6C OS=Mus musculus OX=10090 GN=Cox6c PE=1 SV=3	37	3	6	3	8.5	Cox6c	112280	95888.5	38339.5		273436	626331	2.76379e+06	5.59727e+06
High	Master Protein	Q3TYJ3	Cytoplasmic dynein 1 intermediate chain 1 OS=Mus musculus OX=10090 GN=Dync1i1 PE=1 SV=1	6	4	6	2	69.6	Dync1i1	13947.8		24116.4				1.18908e+06	707537
High	Master Protein	Q61495	Desmoglein-1-alpha OS=Mus musculus OX=10090 GN=Dsg1a PE=2 SV=2	4	5	6	5	114.5	Dsg1a	284551		14427	63243.6	26738.3	819985	707526	257157
High	Master Protein	Q9ET22	Dipeptidyl peptidase 2 OS=Mus musculus OX=10090 GN=Dpp7 PE=1 SV=2	8	4	6	4	56.2	Dpp7		15697.4		121894		62116.2	4118508	2.37982e+06
High	Master Protein	Q61881	DNA replication licensing factor MCM7 OS=Mus musculus OX=10090 GN=Mcm7 PE=1 SV=1	7	4	6	4	81.2	Mcm7	204069	99006	161022		89888.6	273382	593773
High	Master Protein	Q62165	Dystroglycan OS=Mus musculus OX=10090 GN=Dag1 PE=1 SV=4	9	5	6	5	96.8	Dag1	62727.6	29709.4	13320.5	67883.2	154998	76553.5	3.38719e+06	2.23578e+06
High	Master Protein	Q8BH64	EH domain-containing protein 2 OS=Mus musculus OX=10090 GN=Ehd2 PE=1 SV=1	6	3	6	2	61.1	Ehd2		8716.52	8173.49				251409	83225.7
High	Master Protein	F8VPM7	ELKS/Rab6-interacting/CAST family member 1 OS=Mus musculus OX=10090 GN=Erc1 PE=1 SV=1	7	6	6	6	128.3	Erc1	76002.2		21668.3		100112		4.39203e+06	819913
High	Master Protein	Q8K2B0	Endoplasmic reticulum protein SC65 OS=Mus musculus OX=10090 GN=P3h4 PE=1 SV=1	15	5	6	5	51.1	Leprel4; P3h4	177567	94109.6	88317.3		96631.8	351421	3.41082e+06	1.27899e+06
High	Master Protein	A0A0R4J1Q0	Enhancer of mRNA-decapping protein 4 OS=Mus musculus OX=10090 GN=Edc4 PE=1 SV=1	4	3	6	3	150.6	Edc4	27036.6	19003.1	29282.1		14925.5		644903	251902
High	Master Protein	F6W2Q5	Epidermal growth factor receptor substrate 15 OS=Mus musculus OX=10090 GN=Eps15 PE=1 SV=1	6	4	6	4	83.5		22057.5	30177.5	11631		20852.2		719205	347638
High	Master Protein	Q91X78	Erlin-1 OS=Mus musculus OX=10090 GN=Erlin1 PE=1 SV=2	10	3	6	1	39.2								201209	229163
High	Master Protein	Q9Z1D1	Eukaryotic translation initiation factor 3 subunit G OS=Mus musculus OX=10090 GN=Eif3g PE=1 SV=2	19	5	6	5	35.6	Eif3g	94463.7	25502.3	89912.8		38532.5	90439	3.47863e+06	909775
High	Master Protein	Q5MJS3	Extracellular serine/threonine protein kinase FAM20C OS=Mus musculus OX=10090 GN=Fam20c PE=1 SV=1	11	4	6	3	65.7	Fam20c						12153.5	1.30203e+06	778495
High	Master Protein	Q9WTJ4	Flt3-interacting zinc finger protein 1 OS=Mus musculus OX=10090 GN=Fiz1 PE=1 SV=1	11	2	6	2	52.7	Fiz1	97985.1	50794.2	69566.2		103099	101628
Medium	Master Protein	E9PUU4	Gem-associated protein 5 OS=Mus musculus OX=10090 GN=Gemin5 PE=1 SV=1	0	1	6	1	166.6	Gemin5	2.86999e+06	2.28028e+06	10414325	534831	4616675	2.17496e+06	718672	1220689
High	Master Protein	A0A0A0MQ68	Glutaryl-CoA dehydrogenase, mitochondrial OS=Mus musculus OX=10090 GN=Gcdh PE=1 SV=1	13	4	6	4	49.5	Gcdh					15663.4	58730.2	1.4541e+06	963539
High	Master Protein	Q52L67	Gpsn2 protein OS=Mus musculus OX=10090 GN=Tecr PE=1 SV=1	10	4	6	4	41.9	Tecr	239459	165217	57506.9	22460.1	710107	774181	3.64695e+06	1.92649e+06
High	Master Protein	B2RSH2	Guanine nucleotide-binding protein G(i) subunit alpha-1 OS=Mus musculus OX=10090 GN=Gnai1 PE=1 SV=1	13	4	6	1	40.3	Gnai1							8865717	5619954
High	Master Protein	P18872	Guanine nucleotide-binding protein G(o) subunit alpha OS=Mus musculus OX=10090 GN=Gnao1 PE=1 SV=3	11	3	6	1	40.1	Gnao1	26312.7				26964.3		291031	226770
High	Master Protein	P49182	Heparin cofactor 2 OS=Mus musculus OX=10090 GN=Serpind1 PE=1 SV=1	8	4	6	4	54.5	Serpind1		27064.8			17912.3	68518.2	752980	573489
High	Master Protein	F8WJK8	Hsc70-interacting protein OS=Mus musculus OX=10090 GN=St13 PE=1 SV=1	12	4	6	4	40.5		294896	259550	206001		704399	487306	399205	185618
High	Master Protein	P01725	Ig lambda-1 chain V region S178 OS=Mus musculus OX=10090 PE=1 SV=1	21	1	6	1	11.6	Iglv1	66243.8	36218.5			178587	156041	1.1633e+06	588835
High	Master Protein	A0A0G2JEU7	Immunoglobulin heavy variable 1-82 (Fragment) OS=Mus musculus OX=10090 GN=Ighv1-82 PE=1 SV=1	17	2	6	2	12.8		187811	129299	192531	20923.6	195437	250495	212674	565069
High	Master Protein	A0A075B5T6	Immunoglobulin heavy variable V10-3 (Fragment) OS=Mus musculus OX=10090 GN=Ighv10-3 PE=4 SV=1	28	3	6	1	13.5	LOC633728	88727	77468.2	35124.2	33699.2	123020	214444		59829.7
High	Master Protein	A0A075B5L6	Immunoglobulin kappa variable 4-81 OS=Mus musculus OX=10090 GN=Igkv4-81 PE=4 SV=7	19	1	6	1	10.2		156308	28966	17559.2	86069	83445.8	215535	214347	132935
High	Master Protein	P49442	Inositol polyphosphate 1-phosphatase OS=Mus musculus OX=10090 GN=Inpp1 PE=1 SV=2	13	4	6	4	43.3	Inpp1	23103.8	83463.6	24989.4		128555	318702	1.2449e+06	746902
High	Master Protein	F8VQ29	IQ motif-containing GTPase-activating protein 3 OS=Mus musculus OX=10090 GN=Iqgap3 PE=1 SV=1	2	4	6	3	185.2	Iqgap3	348608	357303	460425		115209	409221	7.86654e+06	5.98564e+06
High	Master Protein	P85094	Isochorismatase domain-containing protein 2A OS=Mus musculus OX=10090 GN=Isoc2a PE=1 SV=1	32	3	6	3	22.4	Isoc2a							313228	429310
High	Master Protein	Q9CX00	IST1 homolog OS=Mus musculus OX=10090 GN=Ist1 PE=1 SV=1	13	4	6	4	39.4	Ist1	78925.1	41829.1	25960.6	83991.3	90064.2	126905	3.04326e+06	978092
High	Master Protein	A0A2R8VHM1	KH domain-containing, RNA-binding, signal transduction-associated protein 3 (Fragment) OS=Mus musculus OX=10090 GN=Khdrbs3 PE=1 SV=1	13	2	6	1	14.4				24195.9	41520			485283	231337
High	Master Protein	Q9CPU0	Lactoylglutathione lyase OS=Mus musculus OX=10090 GN=Glo1 PE=1 SV=3	20	3	6	3	20.8	Glo1		14269.1		12721.5	17697.2	101054	2.16409e+06	1.65008e+06
High	Master Protein	P97927	Laminin subunit alpha-4 OS=Mus musculus OX=10090 GN=Lama4 PE=1 SV=2	4	4	6	4	201.7	Lama4	17077.6	8064.14	6545.7	542646	8671.15	44316.4	537128	578918
High	Master Protein	F6TFN2	LIM domain only 7 (Fragment) OS=Mus musculus OX=10090 GN=Lmo7 PE=1 SV=1	3	3	6	3	133.9		28529	7271.6	4519.89		33096.1	58043.2	1.52515e+06	464542
High	Master Protein	D3Z041	Long-chain-fatty-acid--CoA ligase 1 OS=Mus musculus OX=10090 GN=Acsl1 PE=1 SV=1	11	6	6	5	78		75101.8	75783.1	18216.8		37996.5	110221	659107	1.37355e+06
High	Master Protein	Q99LR1	Lysophosphatidylserine lipase ABHD12 OS=Mus musculus OX=10090 GN=Abhd12 PE=1 SV=2	15	5	6	5	45.2	Abhd12	27202.8		40736.6	23896.8	5497	44312.6	1.43652e+06	1.25768e+06
High	Master Protein	Q9Z2D6	Methyl-CpG-binding protein 2 OS=Mus musculus OX=10090 GN=Mecp2 PE=1 SV=1	13	4	6	4	52.3	Mecp2	515979	29396.3				14430.6	2.19774e+06	1.00222e+06
High	Master Protein	A0A1D5RLY6	Microtubule-associated protein 1S OS=Mus musculus OX=10090 GN=Map1s PE=1 SV=1	6	4	6	4	91		11990.2	15885.7	28033.3		13984.5	55579.2	1.52012e+06	454738
High	Master Protein	P53986	Monocarboxylate transporter 1 OS=Mus musculus OX=10090 GN=Slc16a1 PE=1 SV=1	9	3	6	3	53.2	Slc16a1	457910	301058	200754		619294	620443	441915	154234
High	Master Protein	Q9DCG9	Multifunctional methyltransferase subunit TRM112-like protein OS=Mus musculus OX=10090 GN=Trmt112 PE=1 SV=1	16	2	6	2	14.1	Gm13072; Trmt112-ps2; Trmt112	2.08745e+06	1.36634e+06	1.74016e+06	1.32313e+06	2276175	1.38923e+07	298219008	2.81935e+08
High	Master Protein	Q14BI5	Myomesin 2 OS=Mus musculus OX=10090 GN=Myom2 PE=1 SV=1	7	6	6	6	164.6	Myom2				263276		4321.6	158515	666325
High	Master Protein	Q5XKE0	Myosin-binding protein C, fast-type OS=Mus musculus OX=10090 GN=Mybpc2 PE=1 SV=1	8	6	6	5	127.3	Mybpc2	47734.2	28290.8	294684		53209	82777.2	54216.2	949505
High	Master Protein	A0A0R3P9C8	NADH dehydrogenase [ubiquinone] 1 alpha subcomplex subunit 9, mitochondrial OS=Mus musculus OX=10090 GN=Ndufa9 PE=1 SV=1	18	4	6	4	42.1		9440.01	6420.4			7343.9	9026.13	250038	478133
High	Master Protein	Q8VBW6	NEDD8-activating enzyme E1 regulatory subunit OS=Mus musculus OX=10090 GN=Nae1 PE=1 SV=1	8	4	6	4	60.2	Nae1							4.69746e+06	1.29186e+06
High	Master Protein	Q99KQ4	Nicotinamide phosphoribosyltransferase OS=Mus musculus OX=10090 GN=Nampt PE=1 SV=1	13	4	6	4	55.4	Nampt	30308.8	43746	29026.2			83829.7	1.6286e+06	608724
High	Master Protein	Q6GQT9	Nodal modulator 1 OS=Mus musculus OX=10090 GN=Nomo1 PE=1 SV=1	4	4	6	4	133.3	Nomo1	39890.5	45596.2	27954.6		12321.4	103248	1.193e+06	782327
High	Master Protein	B1AU76	Nuclear autoantigenic sperm protein OS=Mus musculus OX=10090 GN=Nasp PE=1 SV=1	6	3	6	3	48.7	Nasp	218229	210563	224768	13480.5	372090	306241	1.29809e+06	462399
High	Master Protein	Q99JX7	Nuclear RNA export factor 1 OS=Mus musculus OX=10090 GN=Nxf1 PE=1 SV=3	8	4	6	4	70.3	Nxf1	56963.6	41978	94542.7		48047	70141.4	1.06896e+06	298306
High	Master Protein	P81117	Nucleobindin-2 OS=Mus musculus OX=10090 GN=Nucb2 PE=1 SV=2	16	5	6	5	50.3	Nucb2	350783	115098	189997	15244.7	26167	188542	1.88533e+06	642025
High	Master Protein	Q3TJD7	PDZ and LIM domain protein 7 OS=Mus musculus OX=10090 GN=Pdlim7 PE=1 SV=1	11	4	6	4	50.1	Pdlim7	265045	127044	171823		208535	418783	3.41395e+06	1.5581e+06
High	Master Protein	Q7TSV4	Phosphoglucomutase-2 OS=Mus musculus OX=10090 GN=Pgm2 PE=1 SV=1	9	4	6	4	68.7	Pgm1	74759.2		66915.6	51443.1		27320.6	2.88586e+06	930489
High	Master Protein	A0A1L1SVK0	Platelet-activating factor acetylhydrolase IB subunit beta (Fragment) OS=Mus musculus OX=10090 GN=Pafah1b2 PE=1 SV=1	29	3	6	3	22		10924.7	10253	16621.7		7286.48	28428.2	509046	712939
High	Master Protein	Q9Z100	Probable carboxypeptidase X1 OS=Mus musculus OX=10090 GN=Cpxm1 PE=2 SV=2	9	4	6	4	80.9	Cpxm1	52445.2	12756.5	19004.8		57234.3	126425	2.64122e+06	1.67304e+06
High	Master Protein	P97371	Proteasome activator complex subunit 1 OS=Mus musculus OX=10090 GN=Psme1 PE=1 SV=2	22	5	6	5	28.7	Psme1	86483.6	34805.6	69836.3		48136.4	11860.6	1.32787e+06	1.05228e+06
High	Master Protein	Q60692	Proteasome subunit beta type-6 OS=Mus musculus OX=10090 GN=Psmb6 PE=1 SV=3	13	3	6	3	25.4	Psmb6	129746	173740	29454.7		155238	634219	6.47762e+06	4.48086e+06
High	Master Protein	H3BKT0	Protein CASP OS=Mus musculus OX=10090 GN=Cux1 PE=1 SV=1	9	5	6	1	77.1	Cux1		31968.6			116289	174774	454957	163501
High	Master Protein	Q9D6U8	Protein FAM162A OS=Mus musculus OX=10090 GN=Fam162a PE=1 SV=1	26	5	6	5	17.7	Fam162a	87404.3	7910.6	17378.7	82875.5	111590	140971	2468096	3.14484e+06
High	Master Protein	Q8C0Z1	Protein FAM234A OS=Mus musculus OX=10090 GN=Fam234a PE=1 SV=1	12	4	6	4	60.5	Itfg3; Fam234a	16865.6	35516.5	50905.8		10783.5		1.36143e+06	1.11334e+06
High	Master Protein	Q80WJ7	Protein LYRIC OS=Mus musculus OX=10090 GN=Mtdh PE=1 SV=1	10	4	6	4	63.8	Mtdh	26931.5			7912.69	163377	142120	1.71666e+06	438242
High	Master Protein	Q9EQQ9	Protein O-GlcNAcase OS=Mus musculus OX=10090 GN=Oga PE=1 SV=2	5	3	6	3	103.1	Mgea5	16776.9	15662.8	26689.6	37163.8	5597.19	17999.5	225642	61143.2
High	Master Protein	Q9JHP7	Protein O-glucosyltransferase 2 OS=Mus musculus OX=10090 GN=Poglut2 PE=1 SV=1	8	3	6	3	57.9	Kdelc1				9112.91			505495	230159
High	Master Protein	P50543	Protein S100-A11 OS=Mus musculus OX=10090 GN=S100a11 PE=1 SV=1	38	3	6	3	11.1	S100a11	12507.6	48802.2	52183.6	10493.5	110525	116692	1.60992e+06	2.47679e+06
High	Master Protein	Q9D1M0	Protein SEC13 homolog OS=Mus musculus OX=10090 GN=Sec13 PE=1 SV=3	22	4	6	4	35.5	Sec13	13009.2		10755.8		9780.3	33336.3	1.66502e+06	984023
High	Master Protein	Q4V9W2	Protein SREK1IP1 OS=Mus musculus OX=10090 GN=Srek1ip1 PE=1 SV=1	16	2	6	2	18.1	Srek1ip1	164874	90689.4	101550	124849	659987	109888	348379	209444
High	Master Protein	P59913	Protein-L-isoaspartate O-methyltransferase domain-containing protein 1 OS=Mus musculus OX=10090 GN=Pcmtd1 PE=1 SV=1	7	3	6	3	40.7	Pcmtd1	307007	166478	25417.4		442415	393387	113344	271666
High	Master Protein	Q8CID3	Pseudokinase FAM20A OS=Mus musculus OX=10090 GN=Fam20a PE=1 SV=1	13	5	6	4	61.5	Fam20a	60308.6	35105	16163.1		166051	278676	7.78019e+06	3.44459e+06
High	Master Protein	O88643	Serine/threonine-protein kinase PAK 1 OS=Mus musculus OX=10090 GN=Pak1 PE=1 SV=1	10	4	6	3	60.7	Pak1							1.37888e+06	262358
High	Master Protein	P62715	Serine/threonine-protein phosphatase 2A catalytic subunit beta isoform OS=Mus musculus OX=10090 GN=Ppp2cb PE=1 SV=1	17	3	6	3	35.6	Ppp2cb	17397.6			37350.7	28621.4	103480	1.3858e+06	1.05217e+06
High	Master Protein	P62317	Small nuclear ribonucleoprotein Sm D2 OS=Mus musculus OX=10090 GN=Snrpd2 PE=1 SV=1	39	3	6	3	13.5	Snrpd2	132944	76397.9	69411.2	20382.9	195902	455685	3.07273e+06	2.49245e+06
High	Master Protein	P27048	Small nuclear ribonucleoprotein-associated protein B OS=Mus musculus OX=10090 GN=Snrpb PE=1 SV=1	13	3	6	3	23.6	Snrpb	63894.6	81401.6	41589.1	17158.7	112443	102378	958713	873257
High	Master Protein	Q91VH2	Sorting nexin-9 OS=Mus musculus OX=10090 GN=Snx9 PE=1 SV=1	6	3	6	3	66.5	Snx9	35278.7	29622.3	30550.5	6922.96	104489	36851.4	1.0477e+06	91145.4
High	Master Protein	Q64674	Spermidine synthase OS=Mus musculus OX=10090 GN=Srm PE=1 SV=1	16	3	6	3	34	Srm	75372.6	486520	72230.5	96961.2	297405	121782	1.14397e+06	1.00324e+06
High	Master Protein	Q8K4Z5	Splicing factor 3A subunit 1 OS=Mus musculus OX=10090 GN=Sf3a1 PE=1 SV=1	4	3	6	3	88.5	Sf3a1	267364	203201	331315		286550	315161	831233	148891
High	Master Protein	Q9ER00	Syntaxin-12 OS=Mus musculus OX=10090 GN=Stx12 PE=1 SV=1	18	4	6	4	31.2	Stx12	126830	30754.1	26066.8	71421.1	124749	210175	2.76292e+06	1.91436e+06
High	Master Protein	D3YTS9	Testicular acid phosphatase OS=Mus musculus OX=10090 GN=Acp4 PE=1 SV=2	20	4	6	4	46.4	Acpt; Acp4							1.61023e+06	500088
High	Master Protein	E9PWF0	Thrombospondin-3 OS=Mus musculus OX=10090 GN=Thbs3 PE=1 SV=1	7	5	6	4	100.1		53243.6	58322.5	68962.1	6812.71	49383.8	122491	4.6092e+06	2.21159e+06
High	Master Protein	F6V6T4	Transmembrane emp24 domain-containing protein 2 (Fragment) OS=Mus musculus OX=10090 GN=Tmed2 PE=1 SV=1	13	2	6	2	20							207135	5.17893e+06	4.60248e+06
High	Master Protein	Q8R138	Transmembrane protein 119 OS=Mus musculus OX=10090 GN=Tmem119 PE=1 SV=1	18	3	6	3	29.4	Tmem119	32506	82722	925719	40187.2	80358.8	143834	4.4812e+06	2.35995e+06
High	Master Protein	Q9Z0L0	Trophoblast glycoprotein OS=Mus musculus OX=10090 GN=Tpbg PE=1 SV=3	13	4	6	4	46.4	Tpbg	11699.6		8316.44		10353.4	8202.05	548810	403523
High	Master Protein	A2A6K0	Troponin I, fast skeletal muscle (Fragment) OS=Mus musculus OX=10090 GN=Tnni2 PE=1 SV=1	38	5	6	5	15.7	Tnni2	156214	63421.5	49440.3		202839	41434.2	79755.3	5.00984e+06
High	Master Protein	P32921	Tryptophan--tRNA ligase, cytoplasmic OS=Mus musculus OX=10090 GN=Wars1 PE=1 SV=2	11	3	6	3	54.3	Wars	44674.5	24070.4	22381.6	55662.1	47847.3	76065.1	613328	352513
High	Master Protein	D3YWF6	Ubiquitinyl hydrolase 1 OS=Mus musculus OX=10090 GN=Otub1 PE=1 SV=1	15	3	6	3	28				10098.5		86624.3	196341	1.8026e+06	1113332
High	Master Protein	Q9D937	Uncharacterized protein C11orf98 homolog OS=Mus musculus OX=10090 PE=1 SV=1	31	3	6	3	14.1	1810009A15Rik; LOC105242733	357613	73782.2	60165.2	38796.6	294625	391826		53263.5
High	Master Protein	Q8VDP2	UPF0428 protein CXorf56 homolog OS=Mus musculus OX=10090 PE=1 SV=1	17	3	6	3	25.6	C330007P06Rik	271525	138713	47222.6	123759	237720	383974	813191	440821
High	Master Protein	Q91ZJ5	UTP--glucose-1-phosphate uridylyltransferase OS=Mus musculus OX=10090 GN=Ugp2 PE=1 SV=3	12	4	6	4	56.9	Ugp2	85055.7	28132.3			63834.1	151045	1.05402e+06	551315
High	Master Protein	F7AI87	26S proteasome non-ATPase regulatory subunit 4 (Fragment) OS=Mus musculus OX=10090 GN=Psmd4 PE=1 SV=1	24	3	5	1	21.3								560206
High	Master Protein	Q920L1	Acyl-CoA (8-3)-desaturase OS=Mus musculus OX=10090 GN=Fads1 PE=1 SV=1	8	3	5	3	52.3	Fads1	42167.5	21229.6		13597.4	189549	39284.1
High	Master Protein	Q9ESW4	Acylglycerol kinase, mitochondrial OS=Mus musculus OX=10090 GN=Agk PE=1 SV=1	11	3	5	3	46.9	Agk	107335	11850			39048.2	116082	345358	418481
High	Master Protein	Q64010	Adapter molecule crk OS=Mus musculus OX=10090 GN=Crk PE=1 SV=1	15	3	5	3	33.8	Crk							285214	204330
High	Master Protein	Q6P5E6	ADP-ribosylation factor-binding protein GGA2 OS=Mus musculus OX=10090 GN=Gga2 PE=1 SV=1	16	5	5	5	66	Gga2	13862.7				75031.9	114315	1.04297e+06	228596
High	Master Protein	Q9JM93	ADP-ribosylation factor-like protein 6-interacting protein 4 OS=Mus musculus OX=10090 GN=Arl6ip4 PE=1 SV=1	7	1	5	1	25.5	Arl6ip4	65141.1	51132.5	40121.5		100652	97305.2		272138
High	Master Protein	A0A1B0GSU0	Aldehyde dehydrogenase family 16 member A1 OS=Mus musculus OX=10090 GN=Aldh16a1 PE=1 SV=1	8	5	5	5	84.7	Aldh16a1	100301	68301	81426.5		93545.3	228309	9.60952e+06	8.41647e+06
High	Master Protein	Q9DBE8	Alpha-1,3/1,6-mannosyltransferase ALG2 OS=Mus musculus OX=10090 GN=Alg2 PE=1 SV=2	14	4	5	4	47.4	Alg2	125487	122425	17826.3		247955	152489	431353	246036
High	Master Protein	Q8BW75	Amine oxidase [flavin-containing] B OS=Mus musculus OX=10090 GN=Maob PE=1 SV=4	12	4	5	4	58.5	Maob	17569.4	52372.5				45733.9	1.81813e+06	1.00896e+06
High	Master Protein	P11609	Antigen-presenting glycoprotein CD1d1 OS=Mus musculus OX=10090 GN=Cd1d1 PE=1 SV=3	13	3	5	3	38.5	Cd1d1						13549.9	1.06879e+06	816214
High	Master Protein	Q9CZ42	ATP-dependent (S)-NAD(P)H-hydrate dehydratase OS=Mus musculus OX=10090 GN=Naxd PE=1 SV=1	23	5	5	5	36.7	Carkd; Naxd			45717.3		64426.3	39876	1.03928e+06	1.05943e+06
High	Master Protein	P04919	Band 3 anion transport protein OS=Mus musculus OX=10090 GN=Slc4a1 PE=1 SV=1	2	2	5	2	103.1	Slc4a1						5533.69	383634	265224
High	Master Protein	Q9R069	Basal cell adhesion molecule OS=Mus musculus OX=10090 GN=Bcam PE=1 SV=1	9	4	5	4	67.6	Bcam	25889.6			5537.95	42145.5	51604.2	2.34993e+06	851493
High	Master Protein	P11798	Calcium/calmodulin-dependent protein kinase type II subunit alpha OS=Mus musculus OX=10090 GN=Camk2a PE=1 SV=2	9	3	5	3	54.1	Camk2a	64880				21895.2	95129.8	589634	324124
High	Master Protein	G3X8T3	Carboxypeptidase OS=Mus musculus OX=10090 GN=Ctsa PE=1 SV=1	6	3	5	3	55.7	Ctsa	54225.4	11161.2		39541.8	33616.4	27154.6	1.73897e+06	1.18847e+06
High	Master Protein	E0CXB9	Catenin alpha-2 OS=Mus musculus OX=10090 GN=Ctnna2 PE=1 SV=1	5	4	5	1	106.7	Ctnna2						17937.1	237958	98919.2
High	Master Protein	Q6ZQ08	CCR4-NOT transcription complex subunit 1 OS=Mus musculus OX=10090 GN=Cnot1 PE=1 SV=2	2	4	5	4	266.6	Cnot1	15629.5	23637.9	40921.4	14283.9	42891.9	41542.3	365398	238296
High	Master Protein	E9QPX1	Collagen alpha-1(XVIII) chain OS=Mus musculus OX=10090 GN=Col18a1 PE=1 SV=1	4	4	5	4	182.2	Col18a1		179023		8387.41	210005	45575.1	939658	833718
High	Master Protein	E9QL65	Component of oligomeric Golgi complex 3 OS=Mus musculus OX=10090 GN=Cog3 PE=1 SV=1	5	3	5	3	94.1	Cog3	60130.4	22795.3	112075		53308	129244	6.91003e+06	2.6282e+06
High	Master Protein	Q99LD4	COP9 signalosome complex subunit 1 OS=Mus musculus OX=10090 GN=Gps1 PE=1 SV=1	15	5	5	5	53.4	Gps1	51506.5	25303.2	34554.3		544144	39917.6	2.05549e+06	417250
High	Master Protein	P59108	Copine-2 OS=Mus musculus OX=10090 GN=Cpne2 PE=1 SV=1	4	2	5	2	61	Cpne2	16065.8	21914.9			20856.6	50123	399154	204581
High	Master Protein	P56546	C-terminal-binding protein 2 OS=Mus musculus OX=10090 GN=Ctbp2 PE=1 SV=2	8	3	5	2	48.9	Ctbp2	812549		112244		201499	849906	566158	337138
High	Master Protein	O88200	C-type lectin domain family 11 member A OS=Mus musculus OX=10090 GN=Clec11a PE=1 SV=1	12	3	5	3	36.4	Clec11a		3383.19	4845.61	6986.01	62704.2	40673.3	2.91432e+06	2.07703e+06
High	Master Protein	Q6ZQ38	Cullin-associated NEDD8-dissociated protein 1 OS=Mus musculus OX=10090 GN=Cand1 PE=1 SV=2	3	3	5	3	136.2	Cand1	145181	114282	93962.1		204778	172076	36121.6	23552.8
High	Master Protein	Q9DBE0	Cysteine sulfinic acid decarboxylase OS=Mus musculus OX=10090 GN=Csad PE=1 SV=1	9	4	5	4	55.1	Csad		210625	232318		455664	886230	1.78605e+07	1.08993e+07
High	Master Protein	A0A0R4J119	Cytoplasmic FMR1-interacting protein OS=Mus musculus OX=10090 GN=Cyfip1 PE=1 SV=1	2	2	5	2	144.8	Cyfip1	127928	89165.6	125480		102211	97469.3	143070
High	Master Protein	Q80XN0	D-beta-hydroxybutyrate dehydrogenase, mitochondrial OS=Mus musculus OX=10090 GN=Bdh1 PE=1 SV=2	11	3	5	3	38.3	Bdh1	33425.2	33530.2		88427.2	10455.2		925032	392502
High	Master Protein	P98078	Disabled homolog 2 OS=Mus musculus OX=10090 GN=Dab2 PE=1 SV=2	5	3	5	3	82.3	Dab2		3640.44	33722		90980	19032	1.34967e+06	346451
High	Master Protein	P31938	Dual specificity mitogen-activated protein kinase kinase 1 OS=Mus musculus OX=10090 GN=Map2k1 PE=1 SV=2	16	5	5	4	43.4	Map2k1	112467	36561.9	32565.7		158241	185647	3.67186e+06	633702
High	Master Protein	F6UIS1	Endoplasmic reticulum-Golgi intermediate compartment protein 3 (Fragment) OS=Mus musculus OX=10090 GN=Ergic3 PE=1 SV=8	8	2	5	2	28			74068.1	18855.4		33523.5	140131	3.17233e+06	2.23583e+06
High	Master Protein	Q9D952	Envoplakin OS=Mus musculus OX=10090 GN=Evpl PE=1 SV=3	3	5	5	5	231.9	Evpl	55813.1		33653.1		144206	96146.3	2.268e+06	418688
High	Master Protein	Q8VEH5	EPM2A-interacting protein 1 OS=Mus musculus OX=10090 GN=Epm2aip1 PE=1 SV=1	13	5	5	5	70.1	Epm2aip1	151393			17966.3	55748.5	34165.2	2.33872e+06	1.02668e+06
High	Master Protein	Q80VP1	Epsin-1 OS=Mus musculus OX=10090 GN=Epn1 PE=1 SV=3	12	3	5	3	60.2	Epn1	851446		1392487			909602	1.12048e+06	365526
High	Master Protein	A0A087WS46	Eukaryotic translation elongation factor 1 beta 2 OS=Mus musculus OX=10090 GN=Eef1b2 PE=1 SV=1	20	3	5	3	20.1		150555	94402		3935.98	351075	284177	915640	622487
High	Master Protein	Q9WUK2	Eukaryotic translation initiation factor 4H OS=Mus musculus OX=10090 GN=Eif4h PE=1 SV=3	21	4	5	4	27.3	Eif4h	30849.7	35003.4	14018.6	17788.3	46850.7	299170	2.29649e+06	1.37195e+06
High	Master Protein	P11404	Fatty acid-binding protein, heart OS=Mus musculus OX=10090 GN=Fabp3 PE=1 SV=5	34	5	5	5	14.8	Fabp3	377724	202126	195450	4359.43	436788	639968	506454	2.70834e+06
High	Master Protein	Q9QXE7	F-box-like/WD repeat-containing protein TBL1X OS=Mus musculus OX=10090 GN=Tbl1x PE=1 SV=2	13	4	5	1	56.8	Tbl1x	437260	12415	94639.2				3.94625e+06	1.1239e+06
High	Master Protein	Q8BHJ5	F-box-like/WD repeat-containing protein TBL1XR1 OS=Mus musculus OX=10090 GN=Tbl1xr1 PE=1 SV=1	14	4	5	1	55.6	Tbl1xr1							166469	84025.4
High	Master Protein	Q6PKB0	Fcgrt protein OS=Mus musculus OX=10090 GN=Fcgrt PE=1 SV=1	5	3	5	3	40.5	Fcgrt	1.93111e+06	556914	776684	699138	678306	4.00339e+06	2.36743e+06	1.76081e+06
High	Master Protein	Q6YJU1	Fetuin-B OS=Mus musculus OX=10090 GN=Fetub PE=1 SV=1	12	3	5	3	33.9	Fetub	288714		51738.1			189010	5.00878e+06	1.69732e+06
High	Master Protein	Q6NWW9	Fibronectin type III domain-containing protein 3B OS=Mus musculus OX=10090 GN=Fndc3b PE=1 SV=1	3	3	5	3	132.7	Fndc3b		13583.6					459339	508105
High	Master Protein	Q501P1	Fibulin-7 OS=Mus musculus OX=10090 GN=Fbln7 PE=1 SV=1	7	3	5	3	47.9	Fbln7	60966	34709.7	115768		96458.8	112525	1.66378e+06	1.32269e+06
High	Master Protein	Q9R111	Guanine deaminase OS=Mus musculus OX=10090 GN=Gda PE=1 SV=1	11	4	5	4	51	Gda	161012			20452	247182	264950	1.50761e+06	965433
High	Master Protein	F6VQH5	Heterogeneous nuclear ribonucleoprotein D-like (Fragment) OS=Mus musculus OX=10090 GN=Hnrnpdl PE=1 SV=1	5	2	5	1	35.6		10838.3		10378.2	9011.85		32555.9	548485	554774
High	Master Protein	D3Z3N4	Heterogeneous nuclear ribonucleoprotein H3 OS=Mus musculus OX=10090 GN=Hnrnph3 PE=1 SV=1	10	3	5	3	36.8	Hnrnph3				36317.2	64316	8197.84	874519	777537
High	Master Protein	P52927	High mobility group protein HMGI-C OS=Mus musculus OX=10090 GN=Hmga2 PE=1 SV=1	21	2	5	2	11.8	Hmga2	141021	42542.4	37754.3	57821	171793	107921
High	Master Protein	Q8BY71	Histone acetyltransferase type B catalytic subunit OS=Mus musculus OX=10090 GN=Hat1 PE=1 SV=1	7	2	5	2	49.2	Hat1	112074	88623.5			98723.1	110630	42331.9
High	Master Protein	P09021	Homeobox protein Hox-A5 OS=Mus musculus OX=10090 GN=Hoxa5 PE=1 SV=1	13	2	5	2	29.2	Hoxa5	180241	78792.6	33953.3		238803	64134	256863	252271
High	Master Protein	P00493	Hypoxanthine-guanine phosphoribosyltransferase OS=Mus musculus OX=10090 GN=Hprt1 PE=1 SV=3	17	3	5	3	24.6	Hprt		11239	13565.7		79531.3	92217.4	822507	360952
High	Master Protein	A0A075B5R3	Immunoglobulin heavy variable 7-2 OS=Mus musculus OX=10090 GN=Ighv7-2 PE=4 SV=1	20	2	5	1	13.3		62074.4	58577.8	40386.3		92821.4	113090	152265	46153.6
High	Master Protein	Q4FJZ2	Importin subunit alpha OS=Mus musculus OX=10090 GN=Kpna6 PE=1 SV=1	10	3	5	2	59.6	Kpna6						20451.4	449348	190981
High	Master Protein	Q62469	Integrin alpha-2 OS=Mus musculus OX=10090 GN=Itga2 PE=1 SV=2	7	5	5	5	128.9	Itga2	67905.1			16628.7	69745.4		783533	613168
High	Master Protein	Q80W68	Kin of IRRE-like protein 1 OS=Mus musculus OX=10090 GN=Kirrel1 PE=1 SV=1	6	3	5	3	87.1	Kirrel	12053.6					23157.5	580944	86126.5
High	Master Protein	Q5UE59	Kinesin light chain OS=Mus musculus OX=10090 GN=Klc1 PE=1 SV=1	7	3	5	2	61.6	Klc1	32822.1	26178.5	33952.6		308079	43714.2	1.29937e+06	189177
High	Master Protein	Q61789	Laminin subunit alpha-3 OS=Mus musculus OX=10090 GN=Lama3 PE=1 SV=4	2	4	5	4	366	Lama3	9203.97						1.77277e+06	1.06496e+06
High	Master Protein	Q8K0C4	Lanosterol 14-alpha demethylase OS=Mus musculus OX=10090 GN=Cyp51a1 PE=1 SV=1	6	3	5	3	56.7	Cyp51	110942	93002.9	74222.4		204396	226669	626384	498436
High	Master Protein	A0A2R8VI94	Leukocyte surface antigen CD47 OS=Mus musculus OX=10090 GN=Cd47 PE=1 SV=1	5	1	5	1	30.4		10518.5	10670.5				31204.8	562930	668585
High	Master Protein	P53395	Lipoamide acyltransferase component of branched-chain alpha-keto acid dehydrogenase complex, mitochondrial OS=Mus musculus OX=10090 GN=Dbt PE=1 SV=2	7	3	5	3	53.2	Dbt	31742.2	10808.6		57810.9	1.23952e+06	55589.7	1.139e+06	711795
High	Master Protein	P17439	Lysosomal acid glucosylceramidase OS=Mus musculus OX=10090 GN=Gba PE=1 SV=1	13	3	5	3	57.6	Gba	38361.3	13661			524399	28971.9	788727	346538
High	Master Protein	P11438	Lysosome-associated membrane glycoprotein 1 OS=Mus musculus OX=10090 GN=Lamp1 PE=1 SV=2	6	2	5	2	43.8	Lamp1	78976.2	116838	31633.6		185216	474738	7.95449e+06	3.7669e+06
High	Master Protein	Q8BTZ7	Mannose-1-phosphate guanyltransferase beta OS=Mus musculus OX=10090 GN=Gmppb PE=1 SV=1	12	3	5	3	39.9	Gmppb						41309.4	897505	1.02382e+06
High	Master Protein	A2AD97	Matrix remodeling-associated protein 8 (Fragment) OS=Mus musculus OX=10090 GN=Mxra8 PE=1 SV=8	14	4	5	4	35		73454.4	23114.3			39776.1	171870	2.15137e+06	1.297e+06
High	Master Protein	Q9QYH6	Melanoma-associated antigen D1 OS=Mus musculus OX=10090 GN=Maged1 PE=1 SV=1	5	3	5	3	85.6	Maged1	139277	54005.9	123346	41458.2	206547	184176	411518	1.58409e+06
High	Master Protein	Q3TPJ7	Midnolin OS=Mus musculus OX=10090 GN=Midn PE=2 SV=1	5	2	5	2	49.2	Midn	87189.1	65029.2	88648.3		120321	99208.1
High	Master Protein	E9Q6M6	Mitochondrial glutamate carrier 1 OS=Mus musculus OX=10090 GN=Slc25a22 PE=1 SV=1	13	3	5	3	24.6		187819	161147			281906	361960	356451	404631
High	Master Protein	Q9D2Y4	Mixed lineage kinase domain-like protein OS=Mus musculus OX=10090 GN=Mlkl PE=1 SV=1	7	3	5	3	54.3	Mlkl	625470	417080	452983		586402	754917	13672972	5.8143e+06
High	Master Protein	P10404	MLV-related proviral Env polyprotein OS=Mus musculus OX=10090 PE=1 SV=3	6	3	5	3	69.6	Env	108251	31146.4	28298.4		45323.3	86234.5	296792	250816
High	Master Protein	Z4YJF5	Myomesin-1 OS=Mus musculus OX=10090 GN=Myom1 PE=1 SV=1	3	5	5	5	175.4									1.91471e+06
High	Master Protein	Q99LC3	NADH dehydrogenase [ubiquinone] 1 alpha subcomplex subunit 10, mitochondrial OS=Mus musculus OX=10090 GN=Ndufa10 PE=1 SV=1	23	4	5	4	40.6	Ndufa10	9647.67				39749.2	28726.2	194903	471855
High	Master Protein	Q9CQZ5	NADH dehydrogenase [ubiquinone] 1 alpha subcomplex subunit 6 OS=Mus musculus OX=10090 GN=Ndufa6 PE=1 SV=1	27	3	5	3	15.3	Ndufa6	10205.2					100182	1.01228e+06	1.42104e+06
High	Master Protein	P70257	Nuclear factor 1 X-type OS=Mus musculus OX=10090 GN=Nfix PE=1 SV=2	9	2	5	2	53.4	Nfix	145173	130236	99718	3829.61	81929.5		1.09575e+06	292362
High	Master Protein	Q921W2	Nucleolysin TIAR OS=Mus musculus OX=10090 GN=Tial1 PE=1 SV=1	9	3	5	3	41.5	Tial1	163963	157474	90022.9		174872	192585	1.75694e+06	1.38406e+06
High	Master Protein	Q8JZM7	Parafibromin OS=Mus musculus OX=10090 GN=Cdc73 PE=1 SV=1	7	3	5	3	60.5	Cdc73	9229.08	20700.4	10820.4			12304.4	410125	111426
High	Master Protein	P27612	Phospholipase A-2-activating protein OS=Mus musculus OX=10090 GN=Plaa PE=1 SV=4	3	2	5	2	87.2	Plaa	38855.3	78117.3	70109.9		103814	63001.4	2.02164e+06
High	Master Protein	B1AY85	Plexin domain-containing protein 2 OS=Mus musculus OX=10090 GN=Plxdc2 PE=1 SV=1	8	3	5	3	59.4	Plxdc2				5424.49	21780.7		1.38646e+06	788157
High	Master Protein	Q8K1R3	Polyribonucleotide nucleotidyltransferase 1, mitochondrial OS=Mus musculus OX=10090 GN=Pnpt1 PE=1 SV=1	3	3	5	3	85.6	Pnpt1	10066.7			33217.8		59094.3	85835.3	145480
High	Master Protein	E9Q8B6	Predicted gene 4788 OS=Mus musculus OX=10090 GN=Gm4788 PE=1 SV=1	4	3	5	1	92.8	Gm4788			14559				77611	40460.8
High	Master Protein	Q80VD1	Protein FAM98B OS=Mus musculus OX=10090 GN=Fam98b PE=1 SV=1	7	2	5	2	45.3	Fam98b			7349.9			58874.6	1.09388e+06	503545
High	Master Protein	A2BE93	Protein SET (Fragment) OS=Mus musculus OX=10090 GN=Set PE=1 SV=1	17	3	5	3	24.9	Set	350628	189327	7875.53		613002	643132	171761	258041
High	Master Protein	Q91XX1	Protocadherin gamma C3 OS=Mus musculus OX=10090 GN=Pcdhgc3 PE=1 SV=1	7	3	5	3	101	Pcdhgc3		12669.1	33547.3		7999.18	26639.8	123478	46558.4
High	Master Protein	A0A2C9F2A2	Ras and Rab interactor 1 OS=Mus musculus OX=10090 GN=Rin1 PE=1 SV=1	3	2	5	2	84.3		86776.1	12669.8	141743		23552.5	77309.4	2.86955e+06	1.75336e+06
High	Master Protein	Q01730	Ras suppressor protein 1 OS=Mus musculus OX=10090 GN=Rsu1 PE=1 SV=3	10	2	5	2	31.5	Rsu1							140916	106809
High	Master Protein	G3X8R0	Receptor expression-enhancing protein OS=Mus musculus OX=10090 GN=Reep5 PE=1 SV=1	12	3	5	3	21.4	Reep5	58943.2	69253.3		5634.44	21898	207000	5.86717e+06	5.82383e+06
High	Master Protein	Q5SWN2	Replication protein A subunit OS=Mus musculus OX=10090 GN=Rpa1 PE=1 SV=2	7	3	5	3	71.4	Rpa1	99097.8	30963	71423.1	21920.9	45199.2	138654	895976	155672
High	Master Protein	P70336	Rho-associated protein kinase 2 OS=Mus musculus OX=10090 GN=Rock2 PE=1 SV=1	4	5	5	3	160.5	Rock2	66457.5	29923.2	48173.9	63260.6	26794.1	116415	2.02684e+06	530646
High	Master Protein	P07742	Ribonucleoside-diphosphate reductase large subunit OS=Mus musculus OX=10090 GN=Rrm1 PE=1 SV=2	11	4	5	4	90.2	Rrm1	16461.3	34770.5			26029.7	48683.9	890889	229618
High	Master Protein	O35609	Secretory carrier-associated membrane protein 3 OS=Mus musculus OX=10090 GN=Scamp3 PE=1 SV=3	11	3	5	3	38.4	Scamp3	145119				57187.7	193515	2.78247e+06	1.29254e+06
High	Master Protein	Q9D2L9	Serine protease FAM111A OS=Mus musculus OX=10090 GN=Fam111a PE=2 SV=1	2	1	5	1	69.9	Fam111a	91762.3	34018.9	74546.7		100377	88790.3	649599	309273
High	Master Protein	Q60676	Serine/threonine-protein phosphatase 5 OS=Mus musculus OX=10090 GN=Ppp5c PE=1 SV=3	10	4	5	4	56.8	Ppp5c	13639.9	11364.5	5509.2	198393	130608	78196.5	3.26883e+06	671334
High	Master Protein	Q99K94	Signal transducer and activator of transcription OS=Mus musculus OX=10090 GN=Stat1 PE=1 SV=1	6	3	5	3	83.1	Stat1	29252.1	35152.2	28753		30434.6	64946.6	412894	148219
High	Master Protein	Q67BT3	Solute carrier family 13 member 5 OS=Mus musculus OX=10090 GN=Slc13a5 PE=2 SV=1	4	3	5	3	63.8	Slc13a5				30006.7		7929.5	785749	620209
High	Master Protein	Q6P069	Sorcin OS=Mus musculus OX=10090 GN=Sri PE=1 SV=1	15	3	5	3	21.6	Sri	45911.2					107723	3.3717e+06	3.28535e+06
High	Master Protein	Q3TGS7	Sorting nexin-12 OS=Mus musculus OX=10090 GN=Snx12 PE=1 SV=1	16	3	5	2	19.2	Snx12	13567.9	28128.5	21579.9		26714.3	83307.1	1.70295e+06	1.15512e+06
High	Master Protein	Q9CQW1	Synaptobrevin homolog YKT6 OS=Mus musculus OX=10090 GN=Ykt6 PE=1 SV=1	24	4	5	4	22.3	Ykt6	47482.7	21711.2	9939.46		19150	40834.9	1.31308e+06	938317
High	Master Protein	Q8R570	Synaptosomal-associated protein 47 OS=Mus musculus OX=10090 GN=Snap47 PE=1 SV=1	16	4	5	4	46.5	Snap47	159450	83164.6	29142		199699	233584	16288.8	62137.9
High	Master Protein	D6RH72	Testin (Fragment) OS=Mus musculus OX=10090 GN=Tes PE=1 SV=2	47	3	5	3	9		126455	89167.5	71535.1		301897	271412	2.14561e+06	973486
High	Master Protein	O08583	THO complex subunit 4 OS=Mus musculus OX=10090 GN=Alyref PE=1 SV=3	16	3	5	3	26.9	Alyref	39118.6	13668.6	12629.7	205758	79002.7	68527.4	798556	645978
High	Master Protein	Q921T2	Torsin-1A-interacting protein 1 OS=Mus musculus OX=10090 GN=Tor1aip1 PE=1 SV=3	8	3	5	3	66.7	Tor1aip1	42645.2	13519.6	23207	40223.2	35049.3	171533	2.01835e+06	1.11934e+06
High	Master Protein	P52875	Transmembrane protein 165 OS=Mus musculus OX=10090 GN=Tmem165 PE=1 SV=2	19	3	5	3	34.8	Tmem165						83241.1	842042	848252
High	Master Protein	Q9JHJ0	Tropomodulin-3 OS=Mus musculus OX=10090 GN=Tmod3 PE=1 SV=1	13	3	5	3	39.5	Tmod3	179602	105074	198415	8917.58	226740	1.75428e+06	6.81676e+07	7.29464e+07
High	Master Protein	Q3UDE2	Tubulin--tyrosine ligase-like protein 12 OS=Mus musculus OX=10090 GN=Ttll12 PE=1 SV=1	7	4	5	4	74	Ttll12	20178	35817.3	13361.1			14944	1.33696e+06	526907
High	Master Protein	P57784	U2 small nuclear ribonucleoprotein A' OS=Mus musculus OX=10090 GN=Snrpa1 PE=1 SV=2	13	3	5	3	28.3	Snrpa1	46587.6		66354.6			41215.4	1.72481e+06	1.26463e+06
High	Master Protein	F8WJC2	Vacuolar protein sorting-associated protein VTA1 homolog OS=Mus musculus OX=10090 GN=Vta1 PE=1 SV=1	39	1	5	1	4.3		19327.9	12428.6			28007.2	34899.8	258030	268455
High	Master Protein	Q9QY76	Vesicle-associated membrane protein-associated protein B OS=Mus musculus OX=10090 GN=Vapb PE=1 SV=3	12	3	5	2	26.9	Vapb						24274.3	490759	443197
High	Master Protein	P51863	V-type proton ATPase subunit d 1 OS=Mus musculus OX=10090 GN=Atp6v0d1 PE=1 SV=2	9	3	5	3	40.3	Atp6v0d1		12625.2		6075.46	13874	21588.2	1.75937e+06	1.57444e+06
High	Master Protein	A0A0N4SW07	V-type proton ATPase subunit E 1 (Fragment) OS=Mus musculus OX=10090 GN=Atp6v1e1 PE=1 SV=1	28	3	5	3	15.1		12359.3				15643.2	33751.5	2.457e+06	1.17646e+06
High	Master Protein	G5E8W8	Zinc finger protein 185 OS=Mus musculus OX=10090 GN=Zfp185 PE=1 SV=1	11	4	5	4	52.8	Zfp185							3.14404e+06	730204
High	Master Protein	Q3TXS7	26S proteasome non-ATPase regulatory subunit 1 OS=Mus musculus OX=10090 GN=Psmd1 PE=1 SV=1	5	3	4	3	105.7	Psmd1	191350	92657.4	198299		173243	134251	334552	56450.1
High	Master Protein	Q9CX56	26S proteasome non-ATPase regulatory subunit 8 OS=Mus musculus OX=10090 GN=Psmd8 PE=1 SV=2	9	3	4	3	39.9	Psmd8	48371.8	17864.1			100734	106257	1.69973e+06	1.18043e+06
High	Master Protein	Q99J99	3-mercaptopyruvate sulfurtransferase OS=Mus musculus OX=10090 GN=Mpst PE=1 SV=4	14	3	4	3	33.1		298789	123555	116566		342133	162434	1.0834e+06	937471
High	Master Protein	A0A494B923	3'-phosphoadenosine-5'-phosphosulfate synthase OS=Mus musculus OX=10090 GN=Papss2 PE=1 SV=1	7	3	4	3	69.4			13962	11035.9		45575.2		1.37308e+06	513647
High	Master Protein	D3Z7X0	Acyl-Coenzyme A dehydrogenase family, member 12 OS=Mus musculus OX=10090 GN=Acad12 PE=1 SV=1	8	3	4	3	61.4	Acad12	22723.5				15056	11729.6	346744	365429
High	Master Protein	E9Q852	Afadin OS=Mus musculus OX=10090 GN=Afdn PE=1 SV=2	1	2	4	2	204.4		38549.5	14316.3	18769.2	14755.9	43953.2	46219	492616
High	Master Protein	O89020	Afamin OS=Mus musculus OX=10090 GN=Afm PE=1 SV=2	5	3	4	3	69.3	Afm							539448	259469
High	Master Protein	P28474	Alcohol dehydrogenase class-3 OS=Mus musculus OX=10090 GN=Adh5 PE=1 SV=3	13	2	4	2	39.5	Adh5							320848	234191
High	Master Protein	O88325	Alpha-N-acetylglucosaminidase OS=Mus musculus OX=10090 GN=Naglu PE=1 SV=1	6	4	4	4	82.5	Naglu	18599.6		32698.1			21009.9	2.41279e+06	527990
High	Master Protein	Q9DB05	Alpha-soluble NSF attachment protein OS=Mus musculus OX=10090 GN=Napa PE=1 SV=1	8	2	4	2	33.2	Napa	91614.4	41514.5		21384.6	63359	39247.1	1.13111e+06	848739
High	Master Protein	Q6PAM1	Alpha-taxilin OS=Mus musculus OX=10090 GN=Txlna PE=1 SV=1	6	2	4	2	62.3	Txlna		52634.2			31682.6	59018.1	922213	409701
High	Master Protein	P84091	AP-2 complex subunit mu OS=Mus musculus OX=10090 GN=Ap2m1 PE=1 SV=1	5	3	4	3	49.6	Ap2m1	294972	217900	161911		338478	369391	1.02034e+06	499109
High	Master Protein	Q02013	Aquaporin-1 OS=Mus musculus OX=10090 GN=Aqp1 PE=1 SV=3	13	3	4	3	28.8	Aqp1	36844	4856.75				184626	6.57268e+06	3.28194e+06
High	Master Protein	Q6P8N8	ATP-dependent Clp protease ATP-binding subunit clpX-like, mitochondrial OS=Mus musculus OX=10090 GN=Clpx PE=1 SV=1	6	3	4	3	67.3	Clpx	34907.7		7727.02	23042.5		109995	1.00263e+06	209025
High	Master Protein	A2BH40	AT-rich interactive domain-containing protein 1A OS=Mus musculus OX=10090 GN=Arid1a PE=1 SV=1	1	3	4	2	241.9	Arid1a			10378.5	10448.5	33918		340789	154682
High	Master Protein	A0A0R4IZW5	Cadherin-1 OS=Mus musculus OX=10090 GN=Cdh1 PE=1 SV=1	5	3	4	3	98.2	Cdh1		11394.1	21053.1				344980	182955
Medium	Master Protein	Q8BWQ4	Cap-specific mRNA (nucleoside-2'-O-)-methyltransferase 2 OS=Mus musculus OX=10090 GN=Cmtr2 PE=2 SV=1	2	1	4	1	87.1	Cmtr2; Ftsjd1	2.31384e+06	66570.4	569362	60216	338923	5.94227e+06	38822.1	30419.9
High	Master Protein	Q8K1J6	CCA tRNA nucleotidyltransferase 1, mitochondrial OS=Mus musculus OX=10090 GN=Trnt1 PE=1 SV=1	7	3	4	3	49.9	Trnt1	43220.4	34386.1	52777		52625.1	109746	993655	379249
High	Master Protein	P40240	CD9 antigen OS=Mus musculus OX=10090 GN=Cd9 PE=1 SV=2	5	1	4	1	25.2	Cd9	236177	21213.3		12231.4		272182	2.50444e+06	1.04881e+06
High	Master Protein	Q8R349	Cell division cycle protein 16 homolog OS=Mus musculus OX=10090 GN=Cdc16 PE=1 SV=1	4	3	4	3	71.4	Cdc16	162813	177593	186277	85112.6	251713	218475	1.07996e+06	431032
High	Master Protein	Q8VBZ3	Cleft lip and palate transmembrane protein 1 homolog OS=Mus musculus OX=10090 GN=Clptm1 PE=1 SV=1	7	2	4	2	75.2	Clptm1	130099	25636.6	91154.4			274254
High	Master Protein	P61924	Coatomer subunit zeta-1 OS=Mus musculus OX=10090 GN=Copz1 PE=1 SV=1	21	3	4	3	20.2	Copz1					60050.8		519710	370275
High	Master Protein	Q9D024	Coiled-coil domain-containing protein 47 OS=Mus musculus OX=10090 GN=Ccdc47 PE=1 SV=2	10	3	4	3	55.8	Ccdc47	206769	150502	173703		296074	359695	810654	506535
High	Master Protein	Q63870	Collagen alpha-1(VII) chain OS=Mus musculus OX=10090 GN=Col7a1 PE=1 SV=3	2	3	4	3	295.1	Col7a1							180533	186104
High	Master Protein	Q921L5	Conserved oligomeric Golgi complex subunit 2 OS=Mus musculus OX=10090 GN=Cog2 PE=1 SV=2	8	4	4	4	82	Cog2	19881.9		18472.8				859842	130321
High	Master Protein	Q6A0A9	Constitutive coactivator of PPAR-gamma-like protein 1 OS=Mus musculus OX=10090 GN=FAM120A PE=1 SV=2	5	3	4	3	121.6	Fam120a	148130	63333.9	134759		501836	366953	201814	46546.1
High	Master Protein	Q06770	Corticosteroid-binding globulin OS=Mus musculus OX=10090 GN=Serpina6 PE=1 SV=1	10	3	4	3	44.7	Serpina6				7191.58	26786.4		1.78556e+06	415286
High	Master Protein	P97792	Coxsackievirus and adenovirus receptor homolog OS=Mus musculus OX=10090 GN=Cxadr PE=1 SV=1	9	3	4	3	39.9	Cxadr				15696.2			1.29828e+06	755025
High	Master Protein	P70698	CTP synthase 1 OS=Mus musculus OX=10090 GN=Ctps1 PE=1 SV=2	7	3	4	3	66.6	Ctps	18493.9		23307.1	20769.7	135069	76801.1		121228
High	Master Protein	E9Q4T8	Cullin-3 OS=Mus musculus OX=10090 GN=Cul3 PE=1 SV=1	7	3	4	3	81.1		22313.7	58493.6		159234	166874	16468.1	527011	85536.3
High	Master Protein	Q9CQ69	Cytochrome b-c1 complex subunit 8 OS=Mus musculus OX=10090 GN=Uqcrq PE=1 SV=3	26	2	4	2	9.8	Uqcrq	66311.9						1.49086e+06	1.22886e+06
High	Master Protein	P12787	Cytochrome c oxidase subunit 5A, mitochondrial OS=Mus musculus OX=10090 GN=Cox5a PE=1 SV=2	22	3	4	3	16.1	Cox5a	111418	137197	18100.3		103763	256269	1.89599e+06	3.81428e+06
High	Master Protein	A0A0J9YTU3	Cytospin-B OS=Mus musculus OX=10090 GN=Specc1 PE=1 SV=1	3	3	4	3	117	Specc1	18855.5	7894.09			20321.6		1.02398e+06	156758
High	Master Protein	Q9JII5	DAZ-associated protein 1 OS=Mus musculus OX=10090 GN=Dazap1 PE=1 SV=2	8	2	4	2	43.2	Dazap1	23027.4	16738.9		30437.5	96259.1	170925	2.62694e+06	1.37471e+06
High	Master Protein	Q60710	Deoxynucleoside triphosphate triphosphohydrolase SAMHD1 OS=Mus musculus OX=10090 GN=Samhd1 PE=1 SV=3	8	4	4	4	75.8			81840.5	185557	5197.99	872967	36503.3	1.13689e+06
High	Master Protein	P55850	Desmocollin-3 OS=Mus musculus OX=10090 GN=Dsc3 PE=1 SV=3	6	3	4	3	100.1	Dsc3				34735.2	16035.2	9012.17	306491	53151.7
High	Master Protein	H7BWY4	Disks large homolog 1 OS=Mus musculus OX=10090 GN=Dlg1 PE=1 SV=1	5	4	4	4	96.8	Dlg1	368873	496020	392283	574619	456981	551183	3.17133e+06	1.06505e+06
High	Master Protein	Q04750	DNA topoisomerase 1 OS=Mus musculus OX=10090 GN=Top1 PE=1 SV=2	5	3	4	3	90.8	Top1	2.03597e+06	1.23511e+06	1.26669e+06		3.28965e+06	4.89637e+06	57528084	3.69402e+07
High	Master Protein	P28352	DNA-(apurinic or apyrimidinic site) endonuclease OS=Mus musculus OX=10090 GN=Apex1 PE=1 SV=2	15	3	4	3	35.5	Apex1					27343		306793	291520
High	Master Protein	Q60611	DNA-binding protein SATB1 OS=Mus musculus OX=10090 GN=Satb1 PE=1 SV=2	10	4	4	4	85.8	Satb1						15702.8	800030	153482
High	Master Protein	O54946	DnaJ homolog subfamily B member 6 OS=Mus musculus OX=10090 GN=Dnajb6 PE=1 SV=4	12	3	4	3	39.8	Dnajb6	47287.4	24244.9	25290		101327	48408.4
High	Master Protein	Q91YW3	DnaJ homolog subfamily C member 3 OS=Mus musculus OX=10090 GN=Dnajc3 PE=1 SV=1	10	4	4	4	57.4	Dnajc3	148243		105949		298649	213781	2.27761e+06	339190
High	Master Protein	Q91YS7	Dual-specificity mitogen-activated protein kinase kinase 2 OS=Mus musculus OX=10090 GN=Map2k2 PE=1 SV=1	8	3	4	2	44.3	Map2k2	39614.3	101873	15583.4		31518.9	78814.5	974600	208660
High	Master Protein	A0A1D5RM94	Dynein light intermediate chain OS=Mus musculus OX=10090 GN=Dync1li2 PE=1 SV=1	10	3	4	3	51.5					29050.8	69243.8	99699.6	2431487	250920
High	Master Protein	P55772	Ectonucleoside triphosphate diphosphohydrolase 1 OS=Mus musculus OX=10090 GN=Entpd1 PE=1 SV=1	10	4	4	4	57.2	Entpd1	19409.6	8886.31			21457.4	71784	2.28141e+06	1.1253e+06
High	Master Protein	Q8BYW9	EGF domain-specific O-linked N-acetylglucosamine transferase OS=Mus musculus OX=10090 GN=Eogt PE=1 SV=1	6	3	4	3	61.4	Eogt	7658.32	8058.68				12346.8	1.33176e+06	883930
High	Master Protein	Q9WUR2	Enoyl-CoA delta isomerase 2 OS=Mus musculus OX=10090 GN=Eci2 PE=1 SV=2	5	2	4	2	43.2	Eci2		8975.77			4797.56		362925	354861
High	Master Protein	Q8R050	Eukaryotic peptide chain release factor GTP-binding subunit ERF3A OS=Mus musculus OX=10090 GN=Gspt1 PE=1 SV=2	3	2	4	2	68.6	Gspt1	169774	120571	114406		221987	262148	1950972	616915
High	Master Protein	Q99L45	Eukaryotic translation initiation factor 2 subunit 2 OS=Mus musculus OX=10090 GN=Eif2s2 PE=1 SV=1	9	3	4	3	38.1	Eif2s2	278499	150595	116160	4154.6	297238	234534	166405	85964.8
High	Master Protein	O70194	Eukaryotic translation initiation factor 3 subunit D OS=Mus musculus OX=10090 GN=Eif3d PE=1 SV=2	8	3	4	3	63.9	Eif3d	87749.4	106290	62685.5		287959	201714
High	Master Protein	Q62448	Eukaryotic translation initiation factor 4 gamma 2 OS=Mus musculus OX=10090 GN=Eif4g2 PE=1 SV=2	4	3	4	3	102	Eif4g2	101936	46822.7	46203.1		87354.9	88221.4	842766	202676
High	Master Protein	E9PUW7	Exportin-7 OS=Mus musculus OX=10090 GN=Xpo7 PE=1 SV=1	3	3	4	3	123.8		189490	178963	181349		256048	308905	2.09331e+06	316866
High	Master Protein	Q61555	Fibrillin-2 OS=Mus musculus OX=10090 GN=Fbn2 PE=1 SV=2	1	2	4	1	313.6	Fbn2					46897.5		1.14411e+06	1.02886e+06
High	Master Protein	Q9R0N0	Galactokinase OS=Mus musculus OX=10090 GN=Galk1 PE=1 SV=2	8	3	4	3	42.3	Galk1	27732.2		18156.2		82799.4	45141.2	2.77827e+06	1.91844e+06
High	Master Protein	Q8CFX1	GDH/6PGL endoplasmic bifunctional protein OS=Mus musculus OX=10090 GN=H6pd PE=1 SV=2	4	3	4	3	88.9	H6pd	8942.31			6334.76	14975.4	62602.3	644203	500627
High	Master Protein	Q99LJ6	Glutathione peroxidase 7 OS=Mus musculus OX=10090 GN=Gpx7 PE=1 SV=1	16	2	4	2	21	Gpx7		28218.1	14029		15662.1	35246.5	2.85015e+06	2.02003e+06
High	Master Protein	P48774	Glutathione S-transferase Mu 5 OS=Mus musculus OX=10090 GN=Gstm5 PE=1 SV=1	8	2	4	1	26.6	Gstm5							698379	322398
High	Master Protein	Q9R062	Glycogenin-1 OS=Mus musculus OX=10090 GN=Gyg1 PE=1 SV=3	12	3	4	3	37.4	Gyg							930999	1.02878e+06
High	Master Protein	Q9CQC9	GTP-binding protein SAR1b OS=Mus musculus OX=10090 GN=Sar1b PE=1 SV=1	20	2	4	1	22.4	Sar1b							77377.3	112960
High	Master Protein	P27601	Guanine nucleotide-binding protein subunit alpha-13 OS=Mus musculus OX=10090 GN=Gna13 PE=1 SV=1	6	2	4	1	44	Gna13		12893.3			8003.14	14825.5	62700.7	65210.8
High	Master Protein	P01899	H-2 class I histocompatibility antigen, D-B alpha chain OS=Mus musculus OX=10090 GN=H2-D1 PE=1 SV=2	14	4	4	3	40.8	H2-D1	122065	49258.9	37545.2		80673.2	176782	2.93088e+06	1.4948e+06
High	Master Protein	Q8BM72	Heat shock 70 kDa protein 13 OS=Mus musculus OX=10090 GN=Hspa13 PE=1 SV=1	8	3	4	3	51.7	Hspa13		66691.7	62044.5			54737.3	841163	533064
High	Master Protein	Q99LI8	Hepatocyte growth factor-regulated tyrosine kinase substrate OS=Mus musculus OX=10090 GN=Hgs PE=1 SV=2	4	3	4	3	86	Hgs	25008.3					55153.8	2.74075e+06	1282937
High	Master Protein	Q8VDM6	Heterogeneous nuclear ribonucleoprotein U-like protein 1 OS=Mus musculus OX=10090 GN=Hnrnpul1 PE=1 SV=1	4	3	4	3	95.9	Hnrnpul1							1.65988e+06	6517.59
High	Master Protein	P01592	Immunoglobulin J chain OS=Mus musculus OX=10090 GN=Jchain PE=1 SV=4	9	1	4	1	18	Igj; Jchain	69166	56175.2	59724.2		91351.2	115418
High	Master Protein	A0A0G2JEI7	Immunoglobulin kappa chain variable 12-38 (Fragment) OS=Mus musculus OX=10090 GN=Igkv12-38 PE=4 SV=4	24	2	4	2	12.5	Igkv12-38	71064.4	49885.2	24158	93454.8	103191	14341	15926.1
High	Master Protein	A0A075B5K9	Immunoglobulin kappa variable 12-98 OS=Mus musculus OX=10090 GN=Igkv12-98 PE=4 SV=7	17	1	4	1	12.3		39810.3	22440.9	12634		28239	58091.2	24025.7
High	Master Protein	O54890	Integrin beta-3 OS=Mus musculus OX=10090 GN=Itgb3 PE=1 SV=2	4	3	4	3	86.7	Itgb3						27373.5	2.40288e+06	705856
High	Master Protein	O89017	Legumain OS=Mus musculus OX=10090 GN=Lgmn PE=1 SV=1	4	1	4	1	49.3	Lgmn				18852		68169.2	340340	240064
Medium	Master Protein	Q80Y17	Lethal(2) giant larvae protein homolog 1 OS=Mus musculus OX=10090 GN=Llgl1 PE=1 SV=1	1	1	4	1	112.5	Llgl1	67469.3	33879.2	64957.1		54465.7	66622.5		126430
High	Master Protein	A0A5F8MPS7	Lysosomal acid phosphatase OS=Mus musculus OX=10090 GN=Acp2 PE=1 SV=1	6	3	4	3	49.6		26334.3					193848	1.23098e+06	723105
High	Master Protein	O09159	Lysosomal alpha-mannosidase OS=Mus musculus OX=10090 GN=Man2b1 PE=1 SV=4	4	3	4	3	114.6	Man2b1		23856.4	8651.13	6128.18		15234.6	500696	413814
High	Master Protein	O35114	Lysosome membrane protein 2 OS=Mus musculus OX=10090 GN=Scarb2 PE=1 SV=3	7	3	4	3	54	Scarb2	52024.1		152904		56880.2	47780.9	2.73153e+06	1.75574e+06
High	Master Protein	P58022	Lysyl oxidase homolog 2 OS=Mus musculus OX=10090 GN=Loxl2 PE=1 SV=2	5	3	4	3	86.9	Loxl2	23076.5	24703	7997.6		25005.1	8695.27	631993	340445
Medium	Master Protein	V9GX81	Maestro heat-like repeat family member 6 OS=Mus musculus OX=10090 GN=Mroh6 PE=1 SV=1	1	1	4	1	78.4	Gm19570; Mroh6	1.63603e+06	2236990	977278	624440	3337920	3343787	3.27879e+06	1.32716e+06
High	Master Protein	Q6ZQI3	Malectin OS=Mus musculus OX=10090 GN=Mlec PE=1 SV=2	22	4	4	4	32.3	Mlec		39915.1		7623.14	49500.7	43739.7	928004	190761
High	Master Protein	Q99MR8	Methylcrotonoyl-CoA carboxylase subunit alpha, mitochondrial OS=Mus musculus OX=10090 GN=Mccc1 PE=1 SV=2	3	2	4	2	79.3	Mccc1	171262	29088.8	98818.9		107979	281130	5.82249e+06	2.69551e+06
High	Master Protein	Q9D9P1	MICOS complex subunit Mic19 OS=Mus musculus OX=10090 GN=Chchd3 PE=1 SV=1	17	3	4	3	20.4	Chchd3					139577	96912.8	1.33063e+06	1.57346e+06
High	Master Protein	A0A0A0MQC7	Microtubule-associated protein OS=Mus musculus OX=10090 GN=Mapt PE=1 SV=1	9	3	4	3	76.2	Mapt			51351		25600.6		1.03132e+06	784330
High	Master Protein	Q61166	Microtubule-associated protein RP/EB family member 1 OS=Mus musculus OX=10090 GN=Mapre1 PE=1 SV=3	18	3	4	3	30	Mapre1				16870.5		265178	4.1233e+06	2.54499e+06
High	Master Protein	Q922Q1	Mitochondrial amidoxime reducing component 2 OS=Mus musculus OX=10090 GN=Mtarc2 PE=1 SV=1	7	3	4	3	38.2	Marc2; Mosc2	67582.3	61694.6	18759.5	7298.04	28744.7	113193	1.66547e+06	1.44128e+06
High	Master Protein	G3UY77	Mitochondrial import receptor subunit TOM40 homolog (Fragment) OS=Mus musculus OX=10090 GN=Tomm40 PE=1 SV=1	22	1	4	1	8						71913.2	29010.1	1.37572e+06	1.08334e+06
High	Master Protein	A0A0A6YWB0	Muscleblind-like protein 1 OS=Mus musculus OX=10090 GN=Mbnl1 PE=1 SV=1	9	3	4	3	37.8	Mbnl1					112136	71464.4	981822	477728
High	Master Protein	Q9CPT4	Myeloid-derived growth factor OS=Mus musculus OX=10090 GN=Mydgf PE=1 SV=1	7	1	4	1	18	D17Wsu104e; Mydgf	15566	5104.36			27392.1	93173	2.82855e+06	2.33175e+06
High	Master Protein	F8WGG3	MYG1 exonuclease (Fragment) OS=Mus musculus OX=10090 GN=Myg1 PE=1 SV=1	8	2	4	2	36.5		27312.9	56995.9	25693	17257.6		33566.4	356796	279097
High	Master Protein	Q8K4Z3	NAD(P)H-hydrate epimerase OS=Mus musculus OX=10090 GN=Naxe PE=1 SV=1	9	2	4	2	31	Apoa1bp; Naxe	131253	168306	153112			217775	1.63917e+06	1.48202e+06
High	Master Protein	Q9Z1P6	NADH dehydrogenase [ubiquinone] 1 alpha subcomplex subunit 7 OS=Mus musculus OX=10090 GN=Ndufa7 PE=1 SV=3	20	2	4	2	12.6	Ndufa7			24081.9	33862.3	75907.4		1.37688e+06	1.44228e+06
High	Master Protein	Q9DCJ5	NADH dehydrogenase [ubiquinone] 1 alpha subcomplex subunit 8 OS=Mus musculus OX=10090 GN=Ndufa8 PE=1 SV=3	25	3	4	3	20	Ndufa8	55806.5						1.41116e+06	1.84556e+06
High	Master Protein	Q9CQC7	NADH dehydrogenase [ubiquinone] 1 beta subcomplex subunit 4 OS=Mus musculus OX=10090 GN=Ndufb4 PE=1 SV=3	29	2	4	2	15.1	Gm3244; Ndufb4; Gm3873	708402	7164.98				22242.8	790515	1.65002e+06
High	Master Protein	Q8C878	NEDD8-activating enzyme E1 catalytic subunit OS=Mus musculus OX=10090 GN=Uba3 PE=1 SV=2	13	3	4	3	51.7	Uba3					5673.15		850021	442824
High	Master Protein	Q80U93	Nuclear pore complex protein Nup214 OS=Mus musculus OX=10090 GN=Nup214 PE=1 SV=2	2	4	4	4	212.8	Nup214	24549.2	12929.4			37903.4	57281.7	1.43371e+06	592895
High	Master Protein	P36552	Oxygen-dependent coproporphyrinogen-III oxidase, mitochondrial OS=Mus musculus OX=10090 GN=Cpox PE=1 SV=2	5	2	4	2	49.7	Cpox	11640.2	10360.4			13386.7		432600	481436
Medium	Master Protein	A0A0G2JF84	Paired immunoglobulin-like type 2 receptor beta-2 OS=Mus musculus OX=10090 GN=Pilrb2 PE=4 SV=1	8	1	4	1	25.4		411917		177011			124204	170118	1.51028e+06
High	Master Protein	P32848	Parvalbumin alpha OS=Mus musculus OX=10090 GN=Pvalb PE=1 SV=3	51	4	4	4	11.9	Pvalb	21951.2		19777.8		133806	37960.3	82019.4	2.21532e+06
High	Master Protein	A0A0J9YV30	Paxillin OS=Mus musculus OX=10090 GN=Pxn PE=1 SV=1	5	2	4	2	46.5		18837.7		13011.3	10811.3	39645.2	44270.9	979540	387440
High	Master Protein	O70400	PDZ and LIM domain protein 1 OS=Mus musculus OX=10090 GN=Pdlim1 PE=1 SV=4	13	3	4	3	35.8	Pdlim1	135986			10324.1	51266	170885	1.17284e+06	533387
High	Master Protein	Q9D1M7	Peptidyl-prolyl cis-trans isomerase FKBP11 OS=Mus musculus OX=10090 GN=Fkbp11 PE=1 SV=1	14	2	4	2	22.1	Fkbp11						121901	1653658	1.73262e+06
High	Master Protein	Q8R2Y8	Peptidyl-tRNA hydrolase 2, mitochondrial OS=Mus musculus OX=10090 GN=Ptrh2 PE=1 SV=1	20	2	4	2	19.5	Ptrh2				33862.5		14345.7	99097	142340
High	Master Protein	Q9R0H0	Peroxisomal acyl-coenzyme A oxidase 1 OS=Mus musculus OX=10090 GN=Acox1 PE=1 SV=5	9	3	4	3	74.6	Acox1	144451	47990.3			58624.4	302080	446925	262238
Medium	Master Protein	E9PXX4	Phosphodiesterase OS=Mus musculus OX=10090 GN=Pde8b PE=1 SV=1	1	1	4	1	82.6	Pde8b	445537	312173	164688	76634	350520	7.13047e+06	811474	895902
High	Master Protein	Q9QY23	Plakophilin-3 OS=Mus musculus OX=10090 GN=Pkp3 PE=1 SV=2	7	4	4	4	87.3	Pkp3	155673		20550.3			56452.4	569163
High	Master Protein	P63005	Platelet-activating factor acetylhydrolase IB subunit beta OS=Mus musculus OX=10090 GN=Pafah1b1 PE=1 SV=2	9	3	4	2	46.6	Pafah1b1	71139.5	34435.5	25495.9		236886	173328	862057
High	Master Protein	Q8CCS6	Polyadenylate-binding protein 2 OS=Mus musculus OX=10090 GN=Pabpn1 PE=1 SV=3	9	2	4	2	32.3	Pabpn1			128568			145086	3.19326e+06	1.57385e+06
Medium	Master Protein	Q8BHV4	Predicted gene 6377 OS=Mus musculus OX=10090 GN=Gm6377 PE=2 SV=1	2	1	4	1	34.4	Gm6377	4.53514e+06	1.46154e+06	1.2635e+06	1.2942e+06	5.62496e+06	5085969	169504	143115
High	Master Protein	Q9D0D4	Probable dimethyladenosine transferase OS=Mus musculus OX=10090 GN=Dimt1 PE=2 SV=1	10	3	4	3	35.3	Dimt1	85186.4	31417.1		35169.3	75695.7	205109
Medium	Master Protein	Q9D2Q2	Probable tRNA (uracil-O(2)-)-methyltransferase OS=Mus musculus OX=10090 GN=Trmt44 PE=2 SV=2	1	1	4	1	79.8	2310079F23Rik; Trmt44	60439	25391.8	43155	28714.4	32257.2	111214	7.55791e+06	989290
High	Master Protein	A2ADY9	Protein DDI1 homolog 2 OS=Mus musculus OX=10090 GN=Ddi2 PE=1 SV=1	11	3	4	3	44.6	Ddi2	17245.7	14456.8			15752.4	37765.2	1.12021e+06	519344
High	Master Protein	Q61239	Protein farnesyltransferase/geranylgeranyltransferase type-1 subunit alpha OS=Mus musculus OX=10090 GN=Fnta PE=1 SV=1	14	3	4	3	44	Fnta			17119		12097	27288.7	1.19741e+06	923815
High	Master Protein	Q8BYB9	Protein O-glucosyltransferase 1 OS=Mus musculus OX=10090 GN=Poglut1 PE=1 SV=2	7	2	4	2	46.4	Poglut1	20430.1	17049.4	9140.5		24099	34077.4	377304	259860
High	Master Protein	G5E897	Protein O-glucosyltransferase 3 OS=Mus musculus OX=10090 GN=Poglut3 PE=1 SV=1	7	2	4	2	57.7	Kdelc2				120326	15120.1	32864.3	795550	343913
High	Master Protein	P49443	Protein phosphatase 1A OS=Mus musculus OX=10090 GN=Ppm1a PE=1 SV=1	5	2	4	1	42.4	Ppm1a							442964	221014
High	Master Protein	Q3U2P1	Protein transport protein Sec24A OS=Mus musculus OX=10090 GN=Sec24a PE=1 SV=1	2	2	4	2	118.7	Sec24a	31726.7	28647.4	12986.9		54633.5	77550.7	1.05352e+06	2.77654e+06
High	Master Protein	Q8BP56	Protein-glucosylgalactosylhydroxylysine glucosidase OS=Mus musculus OX=10090 GN=Pgghg PE=1 SV=1	5	3	4	3	76.4	Athl1; Pgghg		13770.6	12387.4		19483.9	59223.9	859403	761635
High	Master Protein	Q99NF7	Protein-serine/threonine phosphatase OS=Mus musculus OX=10090 GN=Ppm1b PE=1 SV=1	8	3	4	2	52.1	Ppm1b					62298.3		1.43775e+06	973540
High	Master Protein	B2RXS8	Protein-tyrosine-phosphatase OS=Mus musculus OX=10090 GN=Ptprz1 PE=1 SV=1	3	2	4	2	164.3	Ptprz1							473256	370720
High	Master Protein	P63321	Ras-related protein Ral-A OS=Mus musculus OX=10090 GN=Rala PE=1 SV=1	23	4	4	4	23.5	Rala	32097.5	16509.1			47527.3	59257.5	1.26822e+06	1.40522e+06
High	Master Protein	Q61210	Rho guanine nucleotide exchange factor 1 OS=Mus musculus OX=10090 GN=Arhgef1 PE=1 SV=2	6	4	4	4	102.7	Arhgef1		87821.8	86162.7	78095.9	21621.2	32438.5	939754	187380
High	Master Protein	Q8C5R8	Ribose-phosphate diphosphokinase OS=Mus musculus OX=10090 GN=Prps1l1 PE=1 SV=1	7	2	4	2	34.8	Prps1l1	29138.9	84380.3	5609.15		229085	104660	1.552e+06	1.41604e+06
High	Master Protein	Q9Z2B9	Ribosomal protein S6 kinase alpha-4 OS=Mus musculus OX=10090 GN=Rps6ka4 PE=1 SV=2	4	3	4	3	85.6	Rps6ka4	243820	59396.5	175529	11886	68390.2	173156	29629.3
High	Master Protein	Q1HFZ0	RNA cytosine C(5)-methyltransferase NSUN2 OS=Mus musculus OX=10090 GN=Nsun2 PE=1 SV=2	5	3	4	3	85.4	Nsun2	41430.2	16002.7	16411	46048.6	98521.2	322921	1.77723e+06	704174
High	Master Protein	Q9D1J3	SAP domain-containing ribonucleoprotein OS=Mus musculus OX=10090 GN=Sarnp PE=1 SV=3	19	3	4	3	23.5	Sarnp; Gm6563	21015.7		40863.4	18225.6			1.26189e+06	847157
High	Master Protein	P42208	Septin-2 OS=Mus musculus OX=10090 GN=Septin2 PE=1 SV=2	12	3	4	3	41.5	Sept2	137358	115447			120950	214189	278925	126623
High	Master Protein	Q9EP89	Serine beta-lactamase-like protein LACTB, mitochondrial OS=Mus musculus OX=10090 GN=Lactb PE=1 SV=1	7	3	4	3	60.7	Lactb		31297		8112.68	106266		610339	271777
High	Master Protein	Q7TT50	Serine/threonine-protein kinase MRCK beta OS=Mus musculus OX=10090 GN=Cdc42bpb PE=1 SV=2	2	3	4	3	194.6	Cdc42bpb	119249	128333	175674	16459.7	138878	723187	17753144	10229691
High	Master Protein	Q8BX10	Serine/threonine-protein phosphatase PGAM5, mitochondrial OS=Mus musculus OX=10090 GN=Pgam5 PE=1 SV=1	5	2	4	2	32	Pgam5	219721	81875.3	73049.2		146157	171915	765789	759586
High	Master Protein	Q9Z1Z2	Serine-threonine kinase receptor-associated protein OS=Mus musculus OX=10090 GN=Strap PE=1 SV=2	10	3	4	3	38.4	Strap	44407.5	27286.5			70208.4	66890.6	897203	671277
High	Master Protein	Q9JJL8	Serine--tRNA ligase, mitochondrial OS=Mus musculus OX=10090 GN=Sars2 PE=1 SV=2	7	2	4	2	58.3	Sars2		7471.11			16625.5		409084	368712
High	Master Protein	Q62087	Serum paraoxonase/lactonase 3 OS=Mus musculus OX=10090 GN=Pon3 PE=1 SV=2	12	3	4	3	39.3	Pon3	28780.8	46444.4	30566.2			53663.6	787388	1.00008e+06
High	Master Protein	Q8R550	SH3 domain-containing kinase-binding protein 1 OS=Mus musculus OX=10090 GN=Sh3kbp1 PE=1 SV=1	7	4	4	4	78.1	Sh3kbp1	91134.8		19509.4		107218	298364	814817	141231
High	Master Protein	E9Q5L3	Short/branched chain-specific acyl-CoA dehydrogenase, mitochondrial OS=Mus musculus OX=10090 GN=Acadsb PE=1 SV=1	6	2	4	2	51.8		38074.9	37194.5	11596.9		85917	127125	684442	857980
High	Master Protein	D3YWT0	Signal peptidase complex catalytic subunit SEC11 OS=Mus musculus OX=10090 GN=Sec11a PE=1 SV=1	10	2	4	2	19.6		11760.1	33391			108610		368769	324864
High	Master Protein	E9Q740	Signal recognition particle subunit SRP72 OS=Mus musculus OX=10090 GN=Srp72 PE=1 SV=1	6	2	4	2	67.9		36870.7	13289.9	15829.8		53560.8
High	Master Protein	P62309	Small nuclear ribonucleoprotein G OS=Mus musculus OX=10090 GN=Snrpg PE=1 SV=1	26	2	4	2	8.5	Snrpg	29048.6				34302.8	81758.8	2.0502e+06	2.01272e+06
High	Master Protein	Q6PHU5	Sortilin OS=Mus musculus OX=10090 GN=Sort1 PE=1 SV=1	4	3	4	3	91.1	Sort1	19826	19621.4	59949.2	7194.6	12413.2	11786.5	1.23422e+06	852690
High	Master Protein	Q6NZD2	Sorting nexin-1 OS=Mus musculus OX=10090 GN=Snx1 PE=1 SV=1	5	2	4	1	58.8	Snx1						39839	503966	113283
High	Master Protein	D3Z3F8	Spastic paraplegia 20, spartin (Troyer syndrome) homolog (human) OS=Mus musculus OX=10090 GN=Spg20 PE=1 SV=1	9	3	4	3	63				18922.8	6568.09	103012	24959.5	1.89592e+06	986760
High	Master Protein	Q3UJB0	Splicing factor 3b, subunit 2 OS=Mus musculus OX=10090 GN=Sf3b2 PE=1 SV=1	4	3	4	3	98.1	Sf3b2	269659	157324	264732		260304	225821	1.21545e+06	1.07066e+06
High	Master Protein	O70551	SRSF protein kinase 1 OS=Mus musculus OX=10090 GN=Srpk1 PE=1 SV=2	8	3	4	3	73	Srpk1	82128.3	63845.8	41124.8	4557.34	107634	197452		12589.2
High	Master Protein	Q99JB2	Stomatin-like protein 2, mitochondrial OS=Mus musculus OX=10090 GN=Stoml2 PE=1 SV=1	8	2	4	2	38.4	Stoml2					8496.59	17024.6	664145	773195
High	Master Protein	E9QPB2	Suprabasin OS=Mus musculus OX=10090 GN=Sbsn PE=1 SV=1	8	3	4	3	70.5	Sbsn			9191.17	21156.4			2.13498e+06	125061
High	Master Protein	Q64310	Surfeit locus protein 4 OS=Mus musculus OX=10090 GN=Surf4 PE=1 SV=1	11	2	4	2	30.4	Surf4	60256.1	43880.4	39601.4		94657.3	67489.3	239372	97476.8
High	Master Protein	O54941	SWI/SNF-related matrix-associated actin-dependent regulator of chromatin subfamily E member 1 OS=Mus musculus OX=10090 GN=Smarce1 PE=1 SV=1	12	4	4	4	46.6	Smarce1	266374				24564.3	23135.4	2.62131e+06	1.09618e+06
High	Master Protein	Q6A028	Switch-associated protein 70 OS=Mus musculus OX=10090 GN=Swap70 PE=1 SV=2	5	3	4	3	69	Swap70	193788	170773	182495	17816.5	473161	390018	5.00034e+06	76582.6
High	Master Protein	Q9R233	Tapasin OS=Mus musculus OX=10090 GN=Tapbp PE=1 SV=2	5	2	4	2	49.7	Tapbp	73555.8	43348	56025.7	23843.3	65375.8	7364.02	521250	295059
High	Master Protein	A3KMP2	Tetratricopeptide repeat protein 38 OS=Mus musculus OX=10090 GN=Ttc38 PE=1 SV=2	8	3	4	3	52.2	Ttc38							623836	283603
High	Master Protein	Q9Z1A1	TFG protein OS=Mus musculus OX=10090 GN=Tfg PE=1 SV=1	5	2	4	2	43	Tfg	66543.7	101713	62977.4		176279	254976	4.73412e+06	1.52741e+06
High	Master Protein	Q62219	Transforming growth factor beta-1-induced transcript 1 protein OS=Mus musculus OX=10090 GN=Tgfb1i1 PE=1 SV=2	5	2	4	2	50.1	Tgfb1i1	24028.6	23906.1	10440.2			25728.1	327097	190706
High	Master Protein	Q9DCF9	Translocon-associated protein subunit gamma OS=Mus musculus OX=10090 GN=Ssr3 PE=1 SV=1	8	1	4	1	21.1	Ssr3	65220.7				43228	144547	491640	568465
High	Master Protein	Q5SVW9	Transmembrane emp24 domain-containing protein 4 (Fragment) OS=Mus musculus OX=10090 GN=Tmed4 PE=1 SV=1	20	3	4	3	19.1	Tmed4		13133.8				35191.7	806557	956545
High	Master Protein	E9Q7G1	Transmembrane p24-trafficking protein 7 OS=Mus musculus OX=10090 GN=Tmed7 PE=1 SV=1	21	3	4	3	21.3						12211.9	19618.3	580932	318270
High	Master Protein	J3KMG3	Transport and Golgi organization protein 1 homolog (Fragment) OS=Mus musculus OX=10090 GN=Mia3 PE=1 SV=3	6	4	4	1	94.8								1.61402e+06	830900
High	Master Protein	Q3TDT0	Tripartite motif-containing protein 3 OS=Mus musculus OX=10090 GN=Trim3 PE=1 SV=1	7	3	4	3	78.2	Trim3							851053	328378
High	Master Protein	P20801	Troponin C, skeletal muscle OS=Mus musculus OX=10090 GN=Tnnc2 PE=1 SV=2	28	3	4	3	18.1	Tnnc2	94678.2	97762.4	102218		49393.1	83702.7	10673.9	1.05772e+06
High	Master Protein	Q9DAW6	U4/U6 small nuclear ribonucleoprotein Prp4 OS=Mus musculus OX=10090 GN=Prpf4 PE=1 SV=1	8	3	4	3	58.3	Prpf4					9420.33	14925	1.26811e+06	364280
High	Master Protein	Q8VE47	Ubiquitin-like modifier-activating enzyme 5 OS=Mus musculus OX=10090 GN=Uba5 PE=1 SV=2	15	4	4	4	44.8	Uba5		31233.8	17447.4		51911.8	101276	1.54205e+06	532278
High	Master Protein	Q80U95	Ubiquitin-protein ligase E3C OS=Mus musculus OX=10090 GN=Ube3c PE=1 SV=2	2	1	4	1	123.9	Ube3c	32564.7	33522	34447.5		26656.4	41816.3
High	Master Protein	A0A0R4J078	UBX domain-containing protein 4 OS=Mus musculus OX=10090 GN=Ubxn4 PE=1 SV=1	9	3	4	3	56.4	Ubxn4		7232.62					1.04469e+06	536100
High	Master Protein	P97390	Vacuolar protein sorting-associated protein 45 OS=Mus musculus OX=10090 GN=Vps45 PE=1 SV=1	6	3	4	3	65	Vps45	10665.5				18362.2	13350.8	320533	178386
High	Master Protein	P46467	Vacuolar protein sorting-associated protein 4B OS=Mus musculus OX=10090 GN=Vps4b PE=1 SV=2	9	3	4	3	49.4	Vps4b	8435.54	14189.5		79498.9		39194.3	1.10037e+06	123778
High	Master Protein	Q9CR60	Vesicle transport protein GOT1B OS=Mus musculus OX=10090 GN=Golt1b PE=1 SV=1	11	2	4	2	15.4	Golt1b				22308	8720.83	20246.4	287609	343081
High	Master Protein	P16330	2',3'-cyclic-nucleotide 3'-phosphodiesterase OS=Mus musculus OX=10090 GN=Cnp PE=1 SV=3	6	2	3	2	47.1	Cnp	34504.1						1.01927e+06	654666
High	Master Protein	O35593	26S proteasome non-ATPase regulatory subunit 14 OS=Mus musculus OX=10090 GN=Psmd14 PE=1 SV=2	18	3	3	3	34.6	Psmd14						53178.1	1.28175e+06	1.19934e+06
High	Master Protein	P26516	26S proteasome non-ATPase regulatory subunit 7 OS=Mus musculus OX=10090 GN=Psmd7 PE=1 SV=2	12	3	3	3	36.5	Psmd7	11185.7	17486.8			68335.4	108231	777960	38609.6
High	Master Protein	Q8QZS1	3-hydroxyisobutyryl-CoA hydrolase, mitochondrial OS=Mus musculus OX=10090 GN=Hibch PE=1 SV=1	8	3	3	3	43	Hibch	7487.75	3198.47	5463.77		5229.64		257723	231615
High	Master Protein	A0A0G2JGI9	4-alpha-glucanotransferase OS=Mus musculus OX=10090 GN=Agl PE=1 SV=1	3	3	3	3	145			354094	233486		109182		299692	319713
High	Master Protein	O35405	5'-3' exonuclease PLD3 OS=Mus musculus OX=10090 GN=Pld3 PE=1 SV=1	6	3	3	3	54.4	Pld3	147058	107739	178772		175270	141765	3.49982e+06	2.27645e+06
High	Master Protein	Q9CQM8	60S ribosomal protein L21 OS=Mus musculus OX=10090 GN=Rpl21 PE=1 SV=1	16	2	3	2	18.6	Rpl21; Gm14648; Gm10240; Rpl21-ps15	214070	31882.4	164529		93317.8	1.77576e+06	8.63362e+07	2.91093e+07
High	Master Protein	P62911	60S ribosomal protein L32 OS=Mus musculus OX=10090 GN=Rpl32 PE=1 SV=2	18	2	3	2	15.9	Rpl32; Rpl32p	99527.8	24423	18151.1	8917.74	291848	72248.6	1212680	881966
High	Master Protein	Q6ZWZ4	60S ribosomal protein L36 OS=Mus musculus OX=10090 GN=Rpl36 PE=1 SV=1	18	2	3	2	12.2	Rpl36	128039	28550.3	13648.7		245924	226298	523021	370982
High	Master Protein	Q9Z0R9	Acyl-CoA 6-desaturase OS=Mus musculus OX=10090 GN=Fads2 PE=1 SV=1	6	3	3	3	52.4	Fads2	15554.9	19095.2	6637.95	50447	38814.1	42172.4		94385.8
High	Master Protein	Q9D7N9	Adipocyte plasma membrane-associated protein OS=Mus musculus OX=10090 GN=Apmap PE=1 SV=1	6	3	3	3	46.4	Apmap							1.30372e+06	822395
High	Master Protein	P62331	ADP-ribosylation factor 6 OS=Mus musculus OX=10090 GN=Arf6 PE=1 SV=2	12	2	3	2	20.1	Arf6				9195.62		47163.2	262614	164959
High	Master Protein	Q99K28	ADP-ribosylation factor GTPase-activating protein 2 OS=Mus musculus OX=10090 GN=Arfgap2 PE=1 SV=1	5	2	3	2	56.6	Arfgap2	14715.7	20338.2	30126.8		67747.8	44868	1.04897e+06	198977
High	Master Protein	Q8VEH3	ADP-ribosylation factor-like protein 8A OS=Mus musculus OX=10090 GN=Arl8a PE=1 SV=1	24	3	3	3	21.4	Arl8a			15531.2	38911.7	9242.44	48218.6	363211	384538
High	Master Protein	A0A668KLV9	A-kinase anchor protein 12 OS=Mus musculus OX=10090 GN=Akap12 PE=1 SV=1	2	2	3	2	172.5		23049.6	30325	11157.5		29539.6	26056.3	1.00426e+06	991976
High	Master Protein	Q9EPC1	Alpha-parvin OS=Mus musculus OX=10090 GN=Parva PE=1 SV=1	8	2	3	2	42.3	Parva	11746.3		7306.88		5498.7	22386.9	1.15001e+06	435874
High	Master Protein	Q9ESU7	Amino acid transporter OS=Mus musculus OX=10090 GN=Slc1a5 PE=1 SV=1	4	2	3	2	58.4	Slc1a5					18286.4		76650.2	74899
High	Master Protein	Q3UZG4	Aminoacyl tRNA synthase complex-interacting multifunctional protein 1 OS=Mus musculus OX=10090 GN=Aimp1 PE=1 SV=1	11	2	3	2	35.1	Aimp1		27452.9	10847.1		52829.3	38695.7	829072	406363
High	Master Protein	Q91YI0	Argininosuccinate lyase OS=Mus musculus OX=10090 GN=Asl PE=1 SV=1	7	2	3	2	51.7	Asl		29768.3				37933.6	720424	316591
High	Master Protein	Q91WU5	Arsenite methyltransferase OS=Mus musculus OX=10090 GN=As3mt PE=1 SV=2	5	1	3	1	41.8	As3mt							140095	186907
High	Master Protein	A0A0R4J138	Arylsulfatase B OS=Mus musculus OX=10090 GN=Arsb PE=1 SV=1	6	3	3	3	59.7	Arsb	32304.8	65024.2	41840.2		191655	151309	9.02469e+06	2.13926e+06
High	Master Protein	Q61024	Asparagine synthetase [glutamine-hydrolyzing] OS=Mus musculus OX=10090 GN=Asns PE=1 SV=3	6	3	3	3	64.2	Asns	151345	142155	91597.5	7816.21	279960	247308	109871	44160.2
Medium	Master Protein	Q3TPU9	Astrotactin-1 OS=Mus musculus OX=10090 GN=Astn1 PE=1 SV=1	1	1	3	1	93	Astn1	10313266	8.99928e+06	7647959	636927	16165402	14582161	4435522	3534064
High	Master Protein	P47857	ATP-dependent 6-phosphofructokinase, muscle type OS=Mus musculus OX=10090 GN=Pfkm PE=1 SV=3	4	3	3	1	85.2	Pfkm		8961.56	6782.99				224543	116532
High	Master Protein	Q8K363	ATP-dependent RNA helicase DDX18 OS=Mus musculus OX=10090 GN=Ddx18 PE=1 SV=1	3	2	3	2	74.1	Ddx18	88350.7	110962	87423	5150.13	131039	99684.6
High	Master Protein	A0A087WQS2	Basic leucine zipper and W2 domain-containing protein 1 OS=Mus musculus OX=10090 GN=Bzw1 PE=1 SV=1	6	3	3	3	51.2	Bzw1	357268	226705	22605.2		576549	569415	1.74369e+06	391025
High	Master Protein	Q61235	Beta-2-syntrophin OS=Mus musculus OX=10090 GN=Sntb2 PE=1 SV=2	4	2	3	2	56.3	Sntb2							142144	124774
High	Master Protein	J3QNU6	Beta-arrestin-1 OS=Mus musculus OX=10090 GN=Arrb1 PE=1 SV=1	7	2	3	2	47.1						10360.1	34639.9	1.14574e+06	573130
High	Master Protein	P55288	Cadherin-11 OS=Mus musculus OX=10090 GN=Cdh11 PE=1 SV=1	6	3	3	3	88.1	Cdh11	10052.5	8974.16		63115.8	17005.4		844015	890362
High	Master Protein	O08529	Calpain-2 catalytic subunit OS=Mus musculus OX=10090 GN=Capn2 PE=1 SV=4	5	3	3	3	79.8	Capn2	180584	79081.2	111758	4769.39	245708	168481	2.06514e+06	935113
High	Master Protein	P05132	cAMP-dependent protein kinase catalytic subunit alpha OS=Mus musculus OX=10090 GN=Prkaca PE=1 SV=3	6	2	3	1	40.5	Prkaca							94254	102217
High	Master Protein	P68181	cAMP-dependent protein kinase catalytic subunit beta OS=Mus musculus OX=10090 GN=Prkacb PE=1 SV=2	8	3	3	2	40.7	Prkacb	79690.5	40968.8	43323.7		170133	194903	4.20658e+06	1.07446e+06
High	Master Protein	P08074	Carbonyl reductase [NADPH] 2 OS=Mus musculus OX=10090 GN=Cbr2 PE=1 SV=1	16	2	3	2	25.9	Cbr2			4636.36	5195.91	11546.9	11306.1	478678	246384
High	Master Protein	Q9WUU7	Cathepsin Z OS=Mus musculus OX=10090 GN=Ctsz PE=1 SV=1	6	2	3	2	34	Ctsz	35347.3	29742.1		5471.06	72787.9	206180	4503723	3.7095e+06
Low	Master Protein	Q63918	Caveolae-associated protein 2 OS=Mus musculus OX=10090 GN=Cavin2 PE=1 SV=3	3	1	3	1	46.7	Sdpr; Cavin2	437934	287947	442660		569811	549384	428848	200128
High	Master Protein	Q9DCC5	Cbx3 protein OS=Mus musculus OX=10090 GN=Cbx3 PE=1 SV=1	16	2	3	2	20.8	Cbx3							612162	317035
High	Master Protein	A0A3B2W812	CD2-associated protein OS=Mus musculus OX=10090 GN=Cd2ap PE=1 SV=1	7	3	3	3	58.4		26263.7	15532.8	10647.9		44866.5	93794.3	1.85236e+06	394061
High	Master Protein	Q9QWK4	CD5 antigen-like OS=Mus musculus OX=10090 GN=Cd5l PE=1 SV=3	10	3	3	3	38.8	Cd5l	85566.5	56557	197586		577732	102259
High	Master Protein	Q8VDP4	Cell cycle and apoptosis regulator protein 2 OS=Mus musculus OX=10090 GN=Ccar2 PE=1 SV=2	6	3	3	3	102.9	2610301G19Rik; Ccar2			34470.7		18343.2		780199	387113
High	Master Protein	Q6A068	Cell division cycle 5-like protein OS=Mus musculus OX=10090 GN=Cdc5l PE=1 SV=2	5	2	3	2	92.1	Cdc5l	19165.1	16522.6	7382.59		35951.8	43760.3	252675	83959.4
High	Master Protein	O54692	Centromere/kinetochore protein zw10 homolog OS=Mus musculus OX=10090 GN=Zw10 PE=1 SV=3	3	1	3	1	88	Zw10	137224	63703.6	75079	138331	49527.7	149532	163293	54545
High	Master Protein	A2AEM2	Chloride channel CLIC-like protein 1 OS=Mus musculus OX=10090 GN=Clcc1 PE=1 SV=1	5	2	3	2	61.2	Clcc1	2.55043e+06	1.43119e+06	697933		3.35901e+06	3.16172e+06	873908	580898
High	Master Protein	Q58A65	C-Jun-amino-terminal kinase-interacting protein 4 OS=Mus musculus OX=10090 GN=Spag9 PE=1 SV=2	3	3	3	3	146.1	Spag9	38233.5		10495			23884.4	1.1517e+06	266785
High	Master Protein	Q6PFA2	Clathrin light chain OS=Mus musculus OX=10090 GN=Clta PE=1 SV=1	17	3	3	3	23.6	Clta	43242.8	15666.2	9558.13	27982.4	36449.4	233699	5.00467e+06	1.68042e+06
High	Master Protein	Q8BIQ5	Cleavage stimulation factor subunit 2 OS=Mus musculus OX=10090 GN=Cstf2 PE=1 SV=2	7	2	3	2	61.3	Cstf2				30027.3			256844	106923
High	Master Protein	A0A1D5RLP1	Coactosin-like protein OS=Mus musculus OX=10090 GN=Cotl1 PE=1 SV=1	13	2	3	2	13.1							89597	2.42335e+06	1.43737e+06
High	Master Protein	P08122	Collagen alpha-2(IV) chain OS=Mus musculus OX=10090 GN=Col4a2 PE=1 SV=4	1	1	3	1	167.2	Col4a2							2.13265e+06	1.62142e+06
Medium	Master Protein	Q9QZS0	Collagen alpha-3(IV) chain OS=Mus musculus OX=10090 GN=Col4a3 PE=1 SV=2	1	1	3	1	161.6	Col4a3		36732.1	47301.7	673701	76352.9	133109	5.40287e+06	6764083
High	Master Protein	Q8R5L1	Complement component 1 Q subcomponent-binding protein, mitochondrial OS=Mus musculus OX=10090 GN=C1qbp PE=1 SV=1	7	1	3	1	31	C1qbp						35426.5	448281	394374
High	Master Protein	O35864	COP9 signalosome complex subunit 5 OS=Mus musculus OX=10090 GN=Cops5 PE=1 SV=3	4	2	3	2	37.5	Cops5		13131.7			38618.6	52699.7	443546	307666
High	Master Protein	Q9D2V7	Coronin-7 OS=Mus musculus OX=10090 GN=Coro7 PE=1 SV=2	5	3	3	3	100.7	Coro7		7124.66		4496.71		9319.07	775431	365193
High	Master Protein	Q60632	COUP transcription factor 1 OS=Mus musculus OX=10090 GN=Nr2f1 PE=2 SV=2	7	3	3	3	46.1	Nr2f1	169944	157320	64068.5		197465	219864	155249
High	Master Protein	P11440	Cyclin-dependent kinase 1 OS=Mus musculus OX=10090 GN=Cdk1 PE=1 SV=3	7	2	3	2	34.1	Cdk1	363700	229250	55762.6	4555.28	479412	456301	9194742	5.32862e+06
High	Master Protein	Q9CQX2	Cytochrome b5 type B OS=Mus musculus OX=10090 GN=Cyb5b PE=1 SV=1	32	2	3	2	16.3	Cyb5b	38464.2	45440.4			39304.2	124869	411276	596028
High	Master Protein	P19536	Cytochrome c oxidase subunit 5B, mitochondrial OS=Mus musculus OX=10090 GN=Cox5b PE=1 SV=1	15	2	3	2	13.8	Cox5b			53900.6	8052.64			1.06617e+06	1.48377e+06
High	Master Protein	Q9Z2L7	Cytokine receptor-like factor 3 OS=Mus musculus OX=10090 GN=Crlf3 PE=1 SV=1	3	1	3	1	49.5	Crlf3			33586.2				1.38625e+06	301076
High	Master Protein	Q9CXI3	DBH-like monooxygenase protein 1 OS=Mus musculus OX=10090 GN=Moxd1 PE=1 SV=1	5	2	3	2	69.6	Moxd1		13839.2	7369.36		15773.2		275098	95519
High	Master Protein	O35215	D-dopachrome decarboxylase OS=Mus musculus OX=10090 GN=Ddt PE=1 SV=3	21	2	3	2	13.1	Ddt							211994	218617
High	Master Protein	Q99L04	Dehydrogenase/reductase SDR family member 1 OS=Mus musculus OX=10090 GN=Dhrs1 PE=1 SV=1	17	3	3	3	34	Dhrs1				71817.2	64692.8	84949.2	1.35241e+06	1.46057e+06
High	Master Protein	E9QQ29	Dermokine OS=Mus musculus OX=10090 GN=Dmkn PE=1 SV=1	6	3	3	3	52.1		17759.4			6270.42	5456.02	23473.7	1.85134e+06	109284
High	Master Protein	P43247	DNA mismatch repair protein Msh2 OS=Mus musculus OX=10090 GN=Msh2 PE=1 SV=1	3	3	3	3	104.1	Msh2	95051	76340.7	62231.3		136022	29382.6	327789	1.87863e+06
High	Master Protein	P49717	DNA replication licensing factor MCM4 OS=Mus musculus OX=10090 GN=Mcm4 PE=1 SV=1	4	3	3	3	96.7	Mcm4	50844.2	22835.7	17908.5		70477.1	99718.9	247493	80200.6
High	Master Protein	Q99M87	DnaJ homolog subfamily A member 3, mitochondrial OS=Mus musculus OX=10090 GN=Dnaja3 PE=1 SV=1	8	2	3	2	52.4	Dnaja3	144209				74966.5	191989	192357	141978
High	Master Protein	Q9DC23	DnaJ homolog subfamily C member 10 OS=Mus musculus OX=10090 GN=Dnajc10 PE=1 SV=2	5	2	3	2	90.5	Dnajc10	41781.2	37371.7	18134.8		35067.4	81466.8	221192	138436
High	Master Protein	A0A6I8MX00	DnaJ homolog subfamily C member 7 OS=Mus musculus OX=10090 GN=Dnajc7 PE=1 SV=1	5	2	3	2	55.3		16084.1	13330.8			58431.5	72086.8	424813	41382.2
High	Master Protein	A2A5R8	Double-stranded RNA-binding protein Staufen homolog 1 OS=Mus musculus OX=10090 GN=Stau1 PE=1 SV=1	8	3	3	3	53.7	Stau1	51792.1			15377.2	11553.5	51210	467434	248360
High	Master Protein	Q8BPB5	EGF-containing fibulin-like extracellular matrix protein 1 OS=Mus musculus OX=10090 GN=Efemp1 PE=1 SV=1	6	1	3	1	54.9	Efemp1	88900.3		26345.3
High	Master Protein	B1ATP7	ElaC homolog protein 2 OS=Mus musculus OX=10090 GN=Elac2 PE=1 SV=1	5	2	3	2	91.9	Elac2	45930.1	18263.3			24457.9	71469.6	82023.8
High	Master Protein	Q8K0D5	Elongation factor G, mitochondrial OS=Mus musculus OX=10090 GN=Gfm1 PE=1 SV=1	3	2	3	2	83.5	Gfm1					10477.4	30785.2	96722.6	53044.9
High	Master Protein	O08579	Emerin OS=Mus musculus OX=10090 GN=Emd PE=1 SV=1	20	3	3	3	29.4	Emd					41344.5	35433.6	1.2478e+06	230979
High	Master Protein	Q8C522	Endonuclease domain-containing 1 protein OS=Mus musculus OX=10090 GN=Endod1 PE=1 SV=2	5	2	3	2	55.2	Endod1					38271.1		575819	624026
High	Master Protein	Q9EQH2	Endoplasmic reticulum aminopeptidase 1 OS=Mus musculus OX=10090 GN=Erap1 PE=1 SV=2	3	2	3	2	106.5	Erap1							518060	283240
High	Master Protein	Q8VEH8	Endoplasmic reticulum lectin 1 OS=Mus musculus OX=10090 GN=Erlec1 PE=1 SV=1	4	2	3	2	54.9	Erlec1	26509.6	26056.3		250434	53959.2	70639	1.80439e+06	1.02884e+06
High	Master Protein	E9PWK1	Epoxide hydrolase OS=Mus musculus OX=10090 GN=Ephx1 PE=1 SV=1	7	2	3	2	50.9	Ephx1	19750.3						1.23109e+06	482416
High	Master Protein	Q8BWU8	Ethanolamine-phosphate phospho-lyase OS=Mus musculus OX=10090 GN=Etnppl PE=2 SV=1	7	3	3	3	55.5	Agxt2l1; Etnppl							1.18623e+06	784871
High	Master Protein	Q99JX4	Eukaryotic translation initiation factor 3 subunit M OS=Mus musculus OX=10090 GN=Eif3m PE=1 SV=1	5	1	3	1	42.5	Eif3m	51223.3	25918			31527.1	53842.1	99331.7	50030.3
High	Master Protein	Q9CZU3	Exosome RNA helicase MTR4 OS=Mus musculus OX=10090 GN=Mtrex PE=1 SV=1	2	2	3	2	117.6	Skiv2l2	23723.8		24969		44731.1	44879.2	659817	813369
High	Master Protein	Q3U7R1	Extended synaptotagmin-1 OS=Mus musculus OX=10090 GN=Esyt1 PE=1 SV=2	1	1	3	1	121.5	Esyt1							361461	165688
High	Master Protein	G3X9C2	F-box only protein 50 OS=Mus musculus OX=10090 GN=Nccrp1 PE=1 SV=2	9	2	3	2	30.4	Nccrp1	202633	10674.1	9082.45			399050	153078	155539
High	Master Protein	Q8CIB5	Fermitin family homolog 2 OS=Mus musculus OX=10090 GN=Fermt2 PE=1 SV=1	4	2	3	2	77.8	Fermt2				13458.7	35375.6	27139.1	1.24697e+06	1.06135e+06
High	Master Protein	P35505	Fumarylacetoacetase OS=Mus musculus OX=10090 GN=Fah PE=1 SV=2	13	3	3	3	46.1	Fah	55415.4	26436.6	66933.2		153777	53584.8	345462	337441
High	Master Protein	Q8K157	Galactose mutarotase OS=Mus musculus OX=10090 GN=Galm PE=1 SV=1	8	2	3	2	37.8	Galm			13455.5				833246	384033
High	Master Protein	Q07797	Galectin-3-binding protein OS=Mus musculus OX=10090 GN=Lgals3bp PE=1 SV=1	7	2	3	2	64.5	Lgals3bp		12934.3		50282.7		37838.1	475558	309323
High	Master Protein	Q810D6	Glutamate-rich WD repeat-containing protein 1 OS=Mus musculus OX=10090 GN=Grwd1 PE=1 SV=2	8	2	3	2	49.2	Grwd1	83273.1	13299.8	50421.3		42853.8	71893	15174.1
High	Master Protein	Q9D172	Glutamine amidotransferase-like class 1 domain-containing protein 3A, mitochondrial OS=Mus musculus OX=10090 GN=Gatd3a PE=1 SV=1	13	2	3	2	28.1	D10Jhu81e; LOC100046684; LOC102641949	4681.15				14291.7	32554.3	1.91654e+06	1.21936e+06
High	Master Protein	P15105	Glutamine synthetase OS=Mus musculus OX=10090 GN=Glul PE=1 SV=6	8	2	3	2	42.1	Glul		11342.7	14529.9	11832	21970.1	79043.2	2.24071e+06	1.47313e+06
High	Master Protein	G3X8R5	Glutamine-rich protein 1 OS=Mus musculus OX=10090 GN=Qrich1 PE=1 SV=1	5	2	3	2	86.5	Qrich1					27126.6		853817	203007
High	Master Protein	Q8VCU2	Glycosyl-phosphatidylinositol-specific phospholipase D OS=Mus musculus OX=10090 GN=Gpld1 PE=1 SV=1	2	2	3	2	93.6	Gpld1							431903	210804
High	Master Protein	O70310	Glycylpeptide N-tetradecanoyltransferase 1 OS=Mus musculus OX=10090 GN=Nmt1 PE=1 SV=1	5	2	3	2	56.9	Nmt1	62244	11863.4			70981	93488.1	561566
High	Master Protein	E9QP99	Golgin subfamily A member 3 OS=Mus musculus OX=10090 GN=Golga3 PE=1 SV=1	2	3	3	3	167.2	Golga3	128699		145064			87112.4	1.13964e+06	147999
Medium	Master Protein	F6UTM6	Group XIIB secretory phospholipase A2-like protein (Fragment) OS=Mus musculus OX=10090 GN=Pla2g12b PE=1 SV=1	17	1	3	1	11		8521.7	241002	283810		1.81e+06		36865.7
High	Master Protein	A0A1L1ST61	HIG1 domain family member 1A, mitochondrial (Fragment) OS=Mus musculus OX=10090 GN=Higd1a PE=1 SV=1	25	1	3	1	8.2		116091	64389.5	41629.6	55108.5	124061	117476		109726
High	Master Protein	G5E823	Histidine--tRNA ligase OS=Mus musculus OX=10090 GN=Hars2 PE=1 SV=1	4	2	3	1	48.2	Hars2		11324.1					444531	121894
High	Master Protein	Q8VHL1	Histone-lysine N-methyltransferase SETD7 OS=Mus musculus OX=10090 GN=Setd7 PE=1 SV=2	9	2	3	2	40.5	Setd7	602167	313060	333822	80144	524539	1.04577e+06	4.25306e+06	65116.6
High	Master Protein	P38060	Hydroxymethylglutaryl-CoA lyase, mitochondrial OS=Mus musculus OX=10090 GN=Hmgcl PE=1 SV=2	11	2	3	2	34.2	Hmgcl							103099	201747
High	Master Protein	Q8JZK9	Hydroxymethylglutaryl-CoA synthase, cytoplasmic OS=Mus musculus OX=10090 GN=Hmgcs1 PE=1 SV=1	7	3	3	2	57.5	Hmgcs1	60968	56052.7	29705.9		109028	119678	628554	89227.9
High	Master Protein	P01741	Ig heavy chain V region OS=Mus musculus OX=10090 PE=1 SV=1	11	1	3	1	12.5		207757	256402	151731		209760	341459
High	Master Protein	A0A075B5R7	Immunoglobulin heavy variable 14-2 (Fragment) OS=Mus musculus OX=10090 GN=Ighv14-2 PE=4 SV=1	18	2	3	1	13	LOC674140	22668.8	21201.8	17245.5		20611.6	25192.8	1.11104e+06	589056
High	Master Protein	A0A075B5R2	Immunoglobulin heavy variable 7-3 (Fragment) OS=Mus musculus OX=10090 GN=Ighv7-3 PE=4 SV=2	17	2	3	1	13.4		39630.8	35669.5	45137.1	25130.8	214215	154983		18006
High	Master Protein	A0A0A6YW37	Immunoglobulin heavy variable V1-9 (Fragment) OS=Mus musculus OX=10090 GN=Ighv1-9 PE=4 SV=1	21	1	3	1	13		34533.1					23284.9
High	Master Protein	A0A0G2JFA8	Immunoglobulin kappa variable 17-121 (Fragment) OS=Mus musculus OX=10090 GN=Igkv17-121 PE=4 SV=4	14	1	3	1	12.9	Igkv17-121	296619	7884.48		344534	6814.54	575011	108493	168245
High	Master Protein	A0A140T8P4	Immunoglobulin kappa variable 3-9 (Fragment) OS=Mus musculus OX=10090 GN=Igkv3-9 PE=4 SV=2	9	1	3	1	12.9	Igkv3-9	187162	45263.5	58081.2		132363	451313
High	Master Protein	A0A140T8N8	Immunoglobulin kappa variable 9-123 (Fragment) OS=Mus musculus OX=10090 GN=Igkv9-123 PE=4 SV=2	19	2	3	1	12.8	Igkv9-123	84341.9					79462.2
High	Master Protein	Q60960	Importin subunit alpha-5 OS=Mus musculus OX=10090 GN=Kpna1 PE=1 SV=2	6	2	3	1	60.1	Kpna1							187457	73339.8
High	Master Protein	E0CYE2	Inosine-5'-monophosphate dehydrogenase OS=Mus musculus OX=10090 GN=Impdh1 PE=1 SV=1	6	2	3	1	52.4								147005	30965
High	Master Protein	O89051	Integral membrane protein 2B OS=Mus musculus OX=10090 GN=Itm2b PE=1 SV=1	7	2	3	2	30.2	Itm2b		35100.4			57016.6	48547.9	809611	507329
High	Master Protein	Q8R0F6	Integrin-linked kinase-associated serine/threonine phosphatase 2C OS=Mus musculus OX=10090 GN=Ilkap PE=1 SV=1	5	2	3	2	42.7	Ilkap				29756.2			257717	164837
High	Master Protein	E9Q3I4	Intersectin-1 OS=Mus musculus OX=10090 GN=Itsn1 PE=1 SV=1	3	3	3	3	133.1			22178.8	27101.5			39975.9	1.15221e+06
High	Master Protein	P70404	Isocitrate dehydrogenase [NAD] subunit gamma 1, mitochondrial OS=Mus musculus OX=10090 GN=Idh3g PE=1 SV=1	13	3	3	3	42.8	Idh3g					63454.4	53191.1	1.29048e+06	1.59532e+06
High	Master Protein	F6RJV6	LanC-like protein 2 (Fragment) OS=Mus musculus OX=10090 GN=Lancl2 PE=1 SV=1	8	3	3	3	49.7			54532.1	24466.8			27653.4	967834	326156
High	Master Protein	D3Z598	Latent-transforming growth factor beta-binding protein 4 OS=Mus musculus OX=10090 GN=Ltbp4 PE=1 SV=1	2	3	3	3	166.7				13025.5		19294.7	65191.3	410412	1.44105e+06
High	Master Protein	Q91XL1	Leucine-rich HEV glycoprotein OS=Mus musculus OX=10090 GN=Lrg1 PE=1 SV=1	8	2	3	2	37.4	Lrg1				184318		16697.9	851140	481623
High	Master Protein	Q8JZR0	Long-chain-fatty-acid--CoA ligase 5 OS=Mus musculus OX=10090 GN=Acsl5 PE=1 SV=1	5	3	3	2	76.2	Acsl5	49606.3	20450.1	24975.3			69442.6	407014	22591.7
High	Master Protein	Q561M1	Low molecular weight cytosolic acid phosphatase OS=Mus musculus OX=10090 GN=Acp1 PE=1 SV=1	13	2	3	2	17.9	Acp1	40280.9	38711.2			46143.9	79228	660445	552267
High	Master Protein	P28667	MARCKS-related protein OS=Mus musculus OX=10090 GN=Marcksl1 PE=1 SV=2	14	2	3	2	20.2	Marcksl1	21312	19734.1	19234.9		48040.2	85229.6	1.47467e+06	548118
High	Master Protein	Q78IK4	MICOS complex subunit Mic27 OS=Mus musculus OX=10090 GN=Apool PE=1 SV=1	6	1	3	1	29.2	Apool							104758	182412
High	Master Protein	O35857	Mitochondrial import inner membrane translocase subunit TIM44 OS=Mus musculus OX=10090 GN=Timm44 PE=1 SV=2	8	3	3	3	51.1	Timm44					10318.6	24018.8	565145	432265
High	Master Protein	Q9CXT8	Mitochondrial-processing peptidase subunit beta OS=Mus musculus OX=10090 GN=Pmpcb PE=1 SV=1	4	2	3	1	54.6	Pmpcb	24761.8		28802.7		23702.8		479290	215806
High	Master Protein	E9Q3M0	Mothers against decapentaplegic homolog OS=Mus musculus OX=10090 GN=Smad2 PE=1 SV=1	6	2	3	2	48.7		21733.8	23498.1	15552.4		25956.4	31532.5	328279	133113
High	Master Protein	A0A0N4SW94	Myeloid-associated differentiation marker (Fragment) OS=Mus musculus OX=10090 GN=Myadm PE=1 SV=1	21	1	3	1	8.6			27285.6	17976.9		35183.9	56954
High	Master Protein	P04247	Myoglobin OS=Mus musculus OX=10090 GN=Mb PE=1 SV=3	24	3	3	3	17.1	Mb	6190.59	6180.39			29768.6	18181.8	267766	1.1758e+06
High	Master Protein	P70402	Myosin-binding protein H OS=Mus musculus OX=10090 GN=Mybph PE=2 SV=2	10	3	3	3	52.6	Mybph		64557.1			201039			492689
High	Master Protein	Q9JK37	Myozenin-1 OS=Mus musculus OX=10090 GN=Myoz1 PE=1 SV=1	17	3	3	3	31.4	Myoz1							266344	1.23803e+06
High	Master Protein	Q8BUU7	N-acetylgalactosamine kinase OS=Mus musculus OX=10090 GN=Galk2 PE=1 SV=1	5	2	3	2	49.3	Galk2						12951.3	597852	254486
High	Master Protein	Q8CC47	N-acetylgalactosamine-6-sulfatase OS=Mus musculus OX=10090 GN=Galns PE=1 SV=1	4	2	3	1	48.5	Galns							110031	121351
High	Master Protein	Q9DCS9	NADH dehydrogenase [ubiquinone] 1 beta subcomplex subunit 10 OS=Mus musculus OX=10090 GN=Ndufb10 PE=1 SV=3	19	2	3	2	21	Ndufb10					8273.09	19618.5	256886	545312
High	Master Protein	Q9DC70	NADH dehydrogenase [ubiquinone] iron-sulfur protein 7, mitochondrial OS=Mus musculus OX=10090 GN=Ndufs7 PE=1 SV=1	10	2	3	2	24.7	Ndufs7	87501.9	13573.4	29526.1	279739	19467.8	72228.5	481969	588364
High	Master Protein	P97333	Neuropilin-1 OS=Mus musculus OX=10090 GN=Nrp1 PE=1 SV=2	4	2	3	2	102.9	Nrp1							136516	92620.6
High	Master Protein	Q80TM9	Nischarin OS=Mus musculus OX=10090 GN=Nisch PE=1 SV=2	2	3	3	3	174.9	Nisch		31319.4		46841.9	32907.8	10714.7	494032	95613.6
High	Master Protein	A0A3Q4EGR2	Non-specific serine/threonine protein kinase OS=Mus musculus OX=10090 GN=Rock1 PE=1 SV=1	3	3	3	1	127.5		38294.2	44020.8	53059.1		50060.4	59204	370424
High	Master Protein	B1AXN9	Non-specific serine/threonine protein kinase OS=Mus musculus OX=10090 GN=Rps6ka3 PE=1 SV=1	6	3	3	3	80.6	Rps6ka3	6998.39	73204.2		4375.72	102480		1.2467e+06	415872
High	Master Protein	Q8BTS4	Nuclear pore complex protein Nup54 OS=Mus musculus OX=10090 GN=Nup54 PE=1 SV=1	9	3	3	3	55.7	Nup54	700032		566866	35179.2		769664	323223	131552
High	Master Protein	Q9ESX4	Nucleolar protein of 40 kDa OS=Mus musculus OX=10090 GN=Zcchc17 PE=1 SV=1	9	2	3	2	27.5	Zcchc17	60060.6	42527		34390.1	81825.2	72270	114419	114536
High	Master Protein	J3QPB5	Nucleoporin NDC1 OS=Mus musculus OX=10090 GN=Ndc1 PE=1 SV=1	8	2	3	2	60.3		16413.6		20419
High	Master Protein	P97346	Nucleoredoxin OS=Mus musculus OX=10090 GN=Nxn PE=1 SV=1	14	3	3	3	48.3	Nxn					33315.8	24821.9	471987	94422.8
High	Master Protein	Q9CRD0	OCIA domain-containing protein 1 OS=Mus musculus OX=10090 GN=Ociad1 PE=1 SV=1	11	2	3	2	27.6	Ociad1	668689	43109.2	230220		102846	170187	381296	380825
High	Master Protein	Q3UA06	Pachytene checkpoint protein 2 homolog OS=Mus musculus OX=10090 GN=Trip13 PE=1 SV=1	5	2	3	2	48.3	Trip13	137742	67167.6			59266.1	105426	877320	226647
High	Master Protein	Q8BFY6	Peflin OS=Mus musculus OX=10090 GN=Pef1 PE=1 SV=1	9	2	3	2	29.2	Pef1		10582.3			20790.1		115686	153058
High	Master Protein	Q62446	Peptidyl-prolyl cis-trans isomerase FKBP3 OS=Mus musculus OX=10090 GN=Fkbp3 PE=1 SV=2	5	1	3	1	25.1	Fkbp3					29624.7	65224.5	613710	244139
High	Master Protein	O35465	Peptidyl-prolyl cis-trans isomerase FKBP8 OS=Mus musculus OX=10090 GN=Fkbp8 PE=1 SV=2	9	3	3	3	43.5	Fkbp8	83961.3	56212.6	72040.9		198703	100750	559679	324304
High	Master Protein	Q8C0L6	Peroxisomal N(1)-acetyl-spermine/spermidine oxidase OS=Mus musculus OX=10090 GN=Paox PE=1 SV=3	5	2	3	2	55.4	Paox	30567.4	43219	32279.1		62610.2	65393	999541	718165
High	Master Protein	Q9D4J7	PHD finger protein 6 OS=Mus musculus OX=10090 GN=Phf6 PE=1 SV=1	9	3	3	3	41.1	Phf6	79594.1	34384.6	4612.74	8803.59	187890	203606	186278	141625
High	Master Protein	J3QPW1	Phosphatidylinositol transfer protein alpha isoform OS=Mus musculus OX=10090 GN=Pitpna PE=1 SV=1	8	1	3	1	32						14795.4	20893.3	220582	135524
High	Master Protein	Q9EP69	Phosphatidylinositol-3-phosphatase SAC1 OS=Mus musculus OX=10090 GN=Sacm1l PE=1 SV=1	4	2	3	2	66.9	Sacm1l	167952	100803	97027.2		205939	218180	875351	598845
High	Master Protein	A0A0R4J0B2	Phospholipase B-like OS=Mus musculus OX=10090 GN=Plbd1 PE=1 SV=1	6	3	3	3	63	Plbd1	18243.3	14419.1	13914.6		48294.5	54781.7	1.02078e+06	1.30068e+06
High	Master Protein	Q8C7U7	Polypeptide N-acetylgalactosaminyltransferase 6 OS=Mus musculus OX=10090 GN=Galnt6 PE=2 SV=1	6	3	3	3	71.5	Galnt6							464782	209031
High	Master Protein	Q9D7B7	Probable glutathione peroxidase 8 OS=Mus musculus OX=10090 GN=Gpx8 PE=1 SV=1	15	3	3	3	24.1	Gpx8		37134.8				19328.1	1.27252e+06	1.26328e+06
High	Master Protein	Q9JJV2	Profilin-2 OS=Mus musculus OX=10090 GN=Pfn2 PE=1 SV=3	10	1	3	1	15	Pfn2	31216.3	15350.7			56766.4	121060	1.25721e+06	862995
High	Master Protein	A0A494BA05	Programmed cell death protein 4 OS=Mus musculus OX=10090 GN=Pdcd4 PE=1 SV=1	8	2	3	2	35.3		45609.7	14677.6	13617.6			24264.7	990986	327974
High	Master Protein	K3W4L3	Prosaposin OS=Mus musculus OX=10090 GN=Psap PE=1 SV=1	4	1	3	1	61.3								242175	202964
High	Master Protein	Q9Z2U1	Proteasome subunit alpha type-5 OS=Mus musculus OX=10090 GN=Psma5 PE=1 SV=1	12	2	3	2	26.4	Psma5	185502	72413.3		4337.53	153118	344868	3.61544e+06	2.28742e+06
High	Master Protein	Q7TNV0	Protein DEK OS=Mus musculus OX=10090 GN=Dek PE=1 SV=1	6	2	3	2	43.1	Dek	60892.7	69139.5	109073		105373	80838.5
High	Master Protein	Q8VE88	Protein FAM114A2 OS=Mus musculus OX=10090 GN=Fam114a2 PE=1 SV=2	10	3	3	3	54	Fam114a2					6644.74		925463	369739
High	Master Protein	Q8K2F8	Protein LSM14 homolog A OS=Mus musculus OX=10090 GN=Lsm14a PE=1 SV=1	4	2	3	2	50.5	Lsm14a	36814	12943.4	8901.22	6271.9	54660.4		3.46733e+06	840961
High	Master Protein	Q08189	Protein-glutamine gamma-glutamyltransferase E OS=Mus musculus OX=10090 GN=Tgm3 PE=1 SV=2	5	3	3	3	77.3	Tgm3	54652.1	26898.5			38406.1	384024	2.01815e+06	104665
High	Master Protein	Q8BHD8	Protein-L-isoaspartate O-methyltransferase domain-containing protein 2 OS=Mus musculus OX=10090 GN=Pcmtd2 PE=2 SV=1	7	2	3	2	40.7	Pcmtd2	89119.9	28988.3	32950.6		97063.2	78407.8	73825.9	30118
High	Master Protein	P26350	Prothymosin alpha OS=Mus musculus OX=10090 GN=Ptma PE=1 SV=2	26	2	3	2	12.2	Ptma		40386.5		114070	509517	258898
High	Master Protein	F6YD01	Pumilio homolog 2 (Fragment) OS=Mus musculus OX=10090 GN=Pum2 PE=1 SV=1	5	1	3	1	25.3		130189	104292	107767		223266	234916	1.08037e+06	327361
High	Master Protein	Q8K183	Pyridoxal kinase OS=Mus musculus OX=10090 GN=Pdxk PE=1 SV=1	10	2	3	2	35	Pdxk	76125	48839.1			115697	138468	1.02214e+07	6.01307e+06
High	Master Protein	P47199	Quinone oxidoreductase OS=Mus musculus OX=10090 GN=Cryz PE=1 SV=1	6	2	3	2	35.2	Cryz	31935.4		96920.3	2964.68	82454.7	44424.7	184879	537097
High	Master Protein	Q62148	Retinal dehydrogenase 2 OS=Mus musculus OX=10090 GN=Aldh1a2 PE=1 SV=2	3	2	3	1	56.6	Aldh1a2				132624		11821.7	69959.7
High	Master Protein	Q920A5	Retinoid-inducible serine carboxypeptidase OS=Mus musculus OX=10090 GN=Scpep1 PE=1 SV=2	5	2	3	2	50.9	Scpep1					10246.8	33613.8	369927	208150
High	Master Protein	S4R189	Rho guanine nucleotide exchange factor 40 OS=Mus musculus OX=10090 GN=Arhgef40 PE=1 SV=1	2	3	3	3	166.1		106786	15777.6	144670		88422.9	25535	1.86218e+06	1.62266e+06
High	Master Protein	Q9CW46	Ribonucleoprotein PTB-binding 1 OS=Mus musculus OX=10090 GN=Raver1 PE=1 SV=2	10	3	3	3	79.3	Raver1; Raver1-fdx1l; Gm38431	13721.4		9947.25		12172.9	12502	485224	192806
High	Master Protein	Q9CQD0	Ribosomal protein L39-like OS=Mus musculus OX=10090 GN=Rpl39l PE=1 SV=1	12	1	3	1	6.3	Rpl39l	122082	129421	65154.3	209802	468988	272760	3.12615e+06	1.22773e+06
High	Master Protein	Q8BP71	RNA binding protein fox-1 homolog 2 OS=Mus musculus OX=10090 GN=Rbfox2 PE=1 SV=2	10	3	3	3	47.3	Rbfox2							915634	491679
High	Master Protein	Q8BTY8	Sec1 family domain-containing protein 2 OS=Mus musculus OX=10090 GN=Scfd2 PE=1 SV=1	6	3	3	3	74.7	Scfd2		4941.92		48058.4		13292.6	744475	346752
High	Master Protein	P84104	Serine/arginine-rich splicing factor 3 OS=Mus musculus OX=10090 GN=Srsf3 PE=1 SV=1	10	2	3	2	19.3	Srsf3	149640		32135	40325	130222	82486.4
High	Master Protein	Q9JLM8	Serine/threonine-protein kinase DCLK1 OS=Mus musculus OX=10090 GN=Dclk1 PE=1 SV=1	2	1	3	1	84.1	Dclk1	82138.6	26539.8	34323.3		68427.1		61920.9
High	Master Protein	Q9D7P9	Serpin B12 OS=Mus musculus OX=10090 GN=Serpinb12 PE=2 SV=1	12	3	3	3	47.8	Serpinb12	28169.1		39262.9	80336.8		10763.1	258877
High	Master Protein	Q99MR6	Serrate RNA effector molecule homolog OS=Mus musculus OX=10090 GN=Srrt PE=1 SV=1	4	3	3	3	100.4	Srrt	90877.2	42357.9	95669.8		77837.8	85692.7	127105	25613.5
High	Master Protein	Q62086	Serum paraoxonase/arylesterase 2 OS=Mus musculus OX=10090 GN=Pon2 PE=1 SV=2	5	1	3	1	39.6	Pon2	53977	18681.2	34914.6		48473.2	56380.2	234448	787042
High	Master Protein	P52633	Signal transducer and transcription activator 6 OS=Mus musculus OX=10090 GN=Stat6 PE=1 SV=2	4	3	3	3	93.4	Stat6			5938.81			29341.4	212786	41067.7
High	Master Protein	E9Q4F4	Small nuclear ribonucleoprotein E OS=Mus musculus OX=10090 GN=Snrpe PE=1 SV=1	12	1	3	1	10.9			22596.4			16760.4	78920.1	752126	662061
High	Master Protein	Q80UP8	Sodium-dependent phosphate transporter 2 OS=Mus musculus OX=10090 GN=Slc20a2 PE=1 SV=2	9	3	3	3	70.8	Slc20a2	148410	129768	57256.2		199565	348990	5.50719e+06	3.03898e+06
High	Master Protein	Q3UHD6	Sorting nexin-27 OS=Mus musculus OX=10090 GN=Snx27 PE=1 SV=2	5	2	3	2	61	Snx27							1.38819e+06	453573
High	Master Protein	Q8R0X7	Sphingosine-1-phosphate lyase 1 OS=Mus musculus OX=10090 GN=Sgpl1 PE=1 SV=1	5	3	3	3	63.6	Sgpl1	147222	100276	125135		225751	374185	695979	91776.3
High	Master Protein	Q9D554	Splicing factor 3A subunit 3 OS=Mus musculus OX=10090 GN=Sf3a3 PE=1 SV=2	6	3	3	3	58.8	Sf3a3	94306.7	37892	72107	76523.3	158663	33525.3	127104	66863
High	Master Protein	Q8VCC9	Spondin-1 OS=Mus musculus OX=10090 GN=Spon1 PE=1 SV=1	4	2	3	2	90.8	Spon1							615376	196597
High	Master Protein	B2RQS1	Striatin-3 OS=Mus musculus OX=10090 GN=Strn3 PE=1 SV=1	6	3	3	3	77.7	Strn3		22914.5	52790.2		129147	71318.4	1.11528e+06	518010
High	Master Protein	Q91VZ6	Stromal membrane-associated protein 1 OS=Mus musculus OX=10090 GN=Smap1 PE=1 SV=1	5	2	3	2	47.6	Smap1	19462.4		91875.8		34536.3	46045.5	1.78757e+06	900220
High	Master Protein	Q7TN29	Stromal membrane-associated protein 2 OS=Mus musculus OX=10090 GN=Smap2 PE=1 SV=1	3	1	3	1	46.5	Smap2						15718.9	1138795	328195
High	Master Protein	Q9R0M3	Sushi-repeat-containing protein SRPX OS=Mus musculus OX=10090 GN=Srpx PE=2 SV=1	5	2	3	2	51.5	Srpx						14873.2	459970	365327
High	Master Protein	Q3UID0	SWI/SNF complex subunit SMARCC2 OS=Mus musculus OX=10090 GN=Smarcc2 PE=1 SV=1	4	3	3	2	124.6	Smarcc2	4273.99				31303.3	10673	653053	120060
High	Master Protein	Q05117	Tartrate-resistant acid phosphatase type 5 OS=Mus musculus OX=10090 GN=Acp5 PE=1 SV=2	9	2	3	2	36.8	Acp5		13715.2			15927.2	79374	1828816	597804
High	Master Protein	Q99KW9	T-cell immunomodulatory protein OS=Mus musculus OX=10090 GN=Itfg1 PE=1 SV=2	4	2	3	2	67.4	Itfg1							1.01876e+06	650319
High	Master Protein	Q5SSZ5	Tensin-3 OS=Mus musculus OX=10090 GN=Tns3 PE=1 SV=1	3	2	3	2	155.5	Tns3		41099.9			64747.2	96892.1	376903	368774
High	Master Protein	A0A1W2P8C6	Tetraspanin (Fragment) OS=Mus musculus OX=10090 GN=Cd63 PE=1 SV=1	6	2	3	2	17.9			22217.6			195926	276191	3.18024e+06	1.94686e+06
High	Master Protein	P39447	Tight junction protein ZO-1 OS=Mus musculus OX=10090 GN=Tjp1 PE=1 SV=2	2	3	3	3	194.6	Tjp1	29416.2	22155.1			52777.9	41662.5	2.54903e+06	1.31003e+06
High	Master Protein	Q99LJ1	Tissue alpha-L-fucosidase OS=Mus musculus OX=10090 GN=Fuca1 PE=1 SV=1	5	2	3	2	52.2	Fuca1	20239				25625.9	21281	562114	603909
High	Master Protein	Q8K2L8	Trafficking protein particle complex subunit 12 OS=Mus musculus OX=10090 GN=Trappc12 PE=1 SV=2	3	2	3	2	87.6	Trappc12			82835.8		47620.1	13748	493248	225552
High	Master Protein	Q9ESX2	Transcription factor Sp6 OS=Mus musculus OX=10090 GN=Sp6 PE=2 SV=2	9	2	3	2	40	Sp6	146643		116066		161799	201747	2.87225e+06	959542
High	Master Protein	P62915	Transcription initiation factor IIB OS=Mus musculus OX=10090 GN=Gtf2b PE=1 SV=1	8	2	3	2	34.8	Gtf2b	34654.8				17156.4	103256	773861	322081
High	Master Protein	O35295	Transcriptional activator protein Pur-beta OS=Mus musculus OX=10090 GN=Purb PE=1 SV=3	12	2	3	2	33.9	Purb	25060.4	33615.3			97270	35421.9		393733
High	Master Protein	Q00899	Transcriptional repressor protein YY1 OS=Mus musculus OX=10090 GN=Yy1 PE=1 SV=1	9	3	3	3	44.7	Yy1	160161	60193.7	57706.9		175863	236597	797108	151493
High	Master Protein	Q8BM55	Transmembrane protein 214 OS=Mus musculus OX=10090 GN=Tmem214 PE=1 SV=1	4	3	3	3	76.4	Tmem214		83058.7			87374.8	108802	1.29096e+06	503298
High	Master Protein	Q91YR1	Twinfilin-1 OS=Mus musculus OX=10090 GN=Twf1 PE=1 SV=2	8	2	3	2	40.1	Twf1	48003.2	16130	11431.5		21587.9	60960.9	831166	352863
High	Master Protein	P08103	Tyrosine-protein kinase HCK OS=Mus musculus OX=10090 GN=Hck PE=1 SV=4	3	2	3	2	59.1	Hck						20305.3	180181	144842
High	Master Protein	Q9Z138	Tyrosine-protein kinase transmembrane receptor ROR2 OS=Mus musculus OX=10090 GN=Ror2 PE=1 SV=2	2	2	3	2	104.9	Ror2	69904.9	56194.3	63843.4		118396	201674	5.22926e+06	867838
High	Master Protein	Q6NV83	U2 snRNP-associated SURP motif-containing protein OS=Mus musculus OX=10090 GN=U2surp PE=1 SV=3	2	2	3	2	118.2	U2surp	132564	117529	96752.3	8856.09		121527	219475	131404
High	Master Protein	P70362	Ubiquitin recognition factor in ER-associated degradation protein 1 OS=Mus musculus OX=10090 GN=Ufd1 PE=1 SV=2	9	2	3	2	34.5	Ufd1l; Ufd1							182487	175115
High	Master Protein	A0A338P786	Ubiquitin-conjugating enzyme E2 L3 (Fragment) OS=Mus musculus OX=10090 GN=Ube2l3 PE=1 SV=1	15	1	3	1	16.9					47387.6	22207	28593.2	201909	156894
High	Master Protein	Q8C7R4	Ubiquitin-like modifier-activating enzyme 6 OS=Mus musculus OX=10090 GN=Uba6 PE=1 SV=1	2	2	3	2	117.9	Uba6			54597.8	57686.6		190558	2.70563e+06	501508
High	Master Protein	P70460	Vasodilator-stimulated phosphoprotein OS=Mus musculus OX=10090 GN=Vasp PE=1 SV=4	11	3	3	3	39.6	Vasp		46092.9			102542	156051	2.32863e+06	801948
High	Master Protein	O70503	Very-long-chain 3-oxoacyl-CoA reductase OS=Mus musculus OX=10090 GN=Hsd17b12 PE=1 SV=1	3	1	3	1	34.7	Hsd17b12	197258	139066			453827	358957	604280
High	Master Protein	Q91YT7	YTH domain-containing family protein 2 OS=Mus musculus OX=10090 GN=Ythdf2 PE=1 SV=1	6	3	3	2	62.2	Ythdf2	148357	118980	174153		169501	114396	1.68068e+06	249691
High	Master Protein	Q8BJ90	Zinc finger protein 771 OS=Mus musculus OX=10090 GN=Znf771 PE=2 SV=1	7	2	3	2	35.7	Zfp771	183670	37566	17287.7		337397	228085	671536	283503
High	Master Protein	P54923	[Protein ADP-ribosylarginine] hydrolase OS=Mus musculus OX=10090 GN=Adprh PE=1 SV=1	5	1	2	1	40	Adprh				68537.9			125514	109230
High	Master Protein	Q9DAK9	14 kDa phosphohistidine phosphatase OS=Mus musculus OX=10090 GN=Phpt1 PE=1 SV=1	16	1	2	1	14	Phpt1							116031	121578
High	Master Protein	P51432	1-phosphatidylinositol 4,5-bisphosphate phosphodiesterase beta-3 OS=Mus musculus OX=10090 GN=Plcb3 PE=1 SV=2	1	2	2	2	139.4	Plcb3	42648.6	46263.5				46577	456582	158491
High	Master Protein	Q3TIU4	2',5'-phosphodiesterase 12 OS=Mus musculus OX=10090 GN=Pde12 PE=1 SV=2	4	2	2	2	67.5	Pde12	12166.7	26694.6		163043	14474.8	103990	528759	175029
High	Master Protein	A0A286YDW8	26S proteasome non-ATPase regulatory subunit 6 (Fragment) OS=Mus musculus OX=10090 GN=Psmd6 PE=1 SV=1	14	2	2	2	22.8							138569	416626	37540.5
High	Master Protein	Q9D0G0	28S ribosomal protein S30, mitochondrial OS=Mus musculus OX=10090 GN=Mrps30 PE=1 SV=1	2	1	2	1	49.9	Mrps30	47123.5	80166.9	32518.7			62331.7	118646	141462
High	Master Protein	O88986	2-amino-3-ketobutyrate coenzyme A ligase, mitochondrial OS=Mus musculus OX=10090 GN=Gcat PE=1 SV=2	5	1	2	1	44.9	Gcat							108040	80466.5
High	Master Protein	Q9JKF7	39S ribosomal protein L39, mitochondrial OS=Mus musculus OX=10090 GN=Mrpl39 PE=1 SV=4	4	1	2	1	38.5	Mrpl39							43875.8	63601
High	Master Protein	P70245	3-beta-hydroxysteroid-Delta(8),Delta(7)-isomerase OS=Mus musculus OX=10090 GN=Ebp PE=1 SV=3	6	1	2	1	26.2	Ebp	23116.8		18809.7			34042.4	398754	321255
High	Master Protein	Q6NZM8	3'-phosphoadenosine-5'-phosphosulfate synthase OS=Mus musculus OX=10090 GN=Papss1 PE=1 SV=1	5	2	2	2	68.5	Papss1							16887.9
High	Master Protein	A0A2I3BQR1	5'-nucleotidase domain-containing 2 (Fragment) OS=Mus musculus OX=10090 GN=Nt5dc2 PE=1 SV=1	2	1	2	1	54.5		59377.6	26609.8	52139.2		75620	49873.3	230804	239606
High	Master Protein	P47955	60S acidic ribosomal protein P1 OS=Mus musculus OX=10090 GN=Rplp1 PE=1 SV=1	14	1	2	1	11.5	Rplp1	27420.9	13021.2	11354.5		21356.3	47202	79971.8	100543
High	Master Protein	A0A3B2WAL8	Acetyl-CoA acetyltransferase, cytosolic OS=Mus musculus OX=10090 GN=Acat2 PE=1 SV=1	3	1	2	1	35.9		47344	26221.3			118010		1.13885e+06	585226
High	Master Protein	Q9CQR4	Acyl-coenzyme A thioesterase 13 OS=Mus musculus OX=10090 GN=Acot13 PE=1 SV=1	7	1	2	1	15.2	Acot13		9704.82			42964.2		671173	733117
High	Master Protein	J3QP56	Acyl-protein thioesterase 1 OS=Mus musculus OX=10090 GN=Lypla1 PE=1 SV=1	5	1	2	1	23.7	Lypla1						25281.2	437236	316684
High	Master Protein	P08030	Adenine phosphoribosyltransferase OS=Mus musculus OX=10090 GN=Aprt PE=1 SV=2	14	2	2	2	19.7	Aprt	48291.8				15717.6	38711.2	233285	139240
High	Master Protein	E9PWU4	Adiponectin (Fragment) OS=Mus musculus OX=10090 GN=Adipoq PE=1 SV=1	5	1	2	1	17.9		29356.6		15030.8			32442.1	414108	276669
High	Master Protein	Q8CG76	Aflatoxin B1 aldehyde reductase member 2 OS=Mus musculus OX=10090 GN=Akr7a2 PE=1 SV=3	4	1	2	1	40.6	Akr7a5							218351	317122
High	Master Protein	P21300	Aldo-keto reductase family 1 member B7 OS=Mus musculus OX=10090 GN=Akr1b7 PE=1 SV=4	3	1	2	1	36	Akr1b7	68687.2	25938.2			114465	136919	1.96086e+06	1.90816e+06
High	Master Protein	Q8BHC9	Alpha-(1,3)-fucosyltransferase 11 OS=Mus musculus OX=10090 GN=Fut11 PE=1 SV=1	6	2	2	2	55.5	Fut11							191342	85766.1
High	Master Protein	A0A087WQK5	alpha-1,2-Mannosidase OS=Mus musculus OX=10090 GN=Edem3 PE=1 SV=1	2	1	2	1	102.5	Edem3							79632.3	69252.7
High	Master Protein	Q8R3V2	Aminoacyl tRNA synthase complex-interacting multifunctional protein 2 OS=Mus musculus OX=10090 GN=Aimp2 PE=1 SV=1	3	1	2	1	31.1	Aimp2				203462		12787	47107.1	64076.8
High	Master Protein	A2AE27	AMP deaminase OS=Mus musculus OX=10090 GN=Ampd2 PE=1 SV=1	2	2	2	2	94.6	Ampd2	23435.7	34522.5			26910.1	27625.9	797603	252407
High	Master Protein	Q3UHJ0	AP2-associated protein kinase 1 OS=Mus musculus OX=10090 GN=Aak1 PE=1 SV=2	4	2	2	2	103.3	Aak1						18396.2	530645	132899
High	Master Protein	P98203	Armadillo repeat protein deleted in velo-cardio-facial syndrome homolog OS=Mus musculus OX=10090 GN=Arvcf PE=1 SV=2	1	1	2	1	105	Arvcf	5876929	7067.24	101631		52110.3	70819.2	30885.8
Medium	Master Protein	Q9CR84	ATP synthase F(0) complex subunit C1, mitochondrial OS=Mus musculus OX=10090 GN=Atp5mc1 PE=1 SV=1	5	1	2	1	14.2	Atp5g1	2726.72					8931.02	20209.4	661873
High	Master Protein	P03930	ATP synthase protein 8 OS=Mus musculus OX=10090 GN=Mtatp8 PE=1 SV=1	15	1	2	1	7.8	ATP8	31741.8		14853.4	7329.63		182336	1.28515e+06	1.59887e+06
High	Master Protein	Q9D3D9	ATP synthase subunit delta, mitochondrial OS=Mus musculus OX=10090 GN=Atp5f1d PE=1 SV=1	29	2	2	2	17.6	Atp5d	103857	59647.6	51915.5		139861	177389	2.1964e+06	2616346
High	Master Protein	O54984	ATPase GET3 OS=Mus musculus OX=10090 GN=Get3 PE=1 SV=2	3	1	2	1	38.8	Asna1					23004.7	31231.6	366450	145997
High	Master Protein	Q6P542	ATP-binding cassette sub-family F member 1 OS=Mus musculus OX=10090 GN=Abcf1 PE=1 SV=1	2	1	2	1	94.9	Abcf1			32754.7		57978.2
High	Master Protein	O70126	Aurora kinase B OS=Mus musculus OX=10090 GN=Aurkb PE=1 SV=2	3	1	2	1	39.4	Aurkb	29056.5	30360.2			56763.9	57685.6
High	Master Protein	Q91WX5	Bak1 protein OS=Mus musculus OX=10090 GN=Bak1 PE=1 SV=1	17	1	2	1	16.4	Bak1							22535.8	60166
High	Master Protein	P15535	Beta-1,4-galactosyltransferase 1 OS=Mus musculus OX=10090 GN=B4galt1 PE=1 SV=1	2	1	2	1	44.4	B4galt1						27306.4	210497	180294
High	Master Protein	A0A2I3BPG4	Biotin--protein ligase OS=Mus musculus OX=10090 GN=Hlcs PE=1 SV=1	2	1	2	1	94.8								51534.7	33708.3
High	Master Protein	A0A1B0GX27	Branched-chain-amino-acid aminotransferase OS=Mus musculus OX=10090 GN=Bcat2 PE=1 SV=1	6	2	2	2	43.5			18190.1			24436.4		1.19293e+06	1.30397e+06
High	Master Protein	D3Z7P0	BRCA1-A complex subunit BRE OS=Mus musculus OX=10090 GN=Babam2 PE=1 SV=3	4	1	2	1	43.7								173819	91842.9
High	Master Protein	Q9QZK2	Breast cancer anti-estrogen resistance protein 3 homolog OS=Mus musculus OX=10090 GN=Bcar3 PE=1 SV=1	3	2	2	2	92.2	Bcar3	85976.7	47760.8	82290.3		66958.6	47585.9	113333	167994
High	Master Protein	A0A0A6YVS2	Calcium load-activated calcium channel (Fragment) OS=Mus musculus OX=10090 GN=Tmco1 PE=1 SV=1	8	1	2	1	22.4								50568.2	65742.9
High	Master Protein	Q06138	Calcium-binding protein 39 OS=Mus musculus OX=10090 GN=Cab39 PE=1 SV=2	3	1	2	1	39.8	Cab39							53618.3	61895.9
High	Master Protein	Q8C196	Carbamoyl-phosphate synthase [ammonia], mitochondrial OS=Mus musculus OX=10090 GN=Cps1 PE=1 SV=2	1	2	2	1	164.5	Cps1		63255.4	62345
High	Master Protein	Q9DBB9	Carboxypeptidase N subunit 2 OS=Mus musculus OX=10090 GN=Cpn2 PE=1 SV=2	3	1	2	1	60.4	Cpn2							180726	106963
High	Master Protein	Q60737	Casein kinase II subunit alpha OS=Mus musculus OX=10090 GN=Csnk2a1 PE=1 SV=2	8	2	2	2	45.1	Csnk2a1	11932		25621.4			18005.3	243927	175320
High	Master Protein	O88587	Catechol O-methyltransferase OS=Mus musculus OX=10090 GN=Comt PE=1 SV=2	9	1	2	1	29.5	Comt					7775.95	12373.8	71884.8	67256.3
High	Master Protein	Q8VE98	CD276 antigen OS=Mus musculus OX=10090 GN=Cd276 PE=1 SV=1	6	2	2	2	34	Cd276							589759	437614
High	Master Protein	A0A140LJL0	CD81 antigen (Fragment) OS=Mus musculus OX=10090 GN=Cd81 PE=1 SV=1	17	1	2	1	13.2			19168.9			15609.7	99814.4	232611	594763
High	Master Protein	Q8VEK0	Cell cycle control protein 50A OS=Mus musculus OX=10090 GN=Tmem30a PE=1 SV=1	2	1	2	1	41	Tmem30a	229902	110975	100001		291065	588874	1.26617e+06	768046
High	Master Protein	O35744	Chitinase-like protein 3 OS=Mus musculus OX=10090 GN=Chil3 PE=1 SV=2	7	2	2	2	44.4	Chi3l3; Chil3							354464	319085
High	Master Protein	F6S062	Choline kinase alpha (Fragment) OS=Mus musculus OX=10090 GN=Chka PE=1 SV=1	6	1	2	1	26.2			22587.8					106346	83394.9
High	Master Protein	A0A1Y7VJ97	Cleavage and polyadenylation-specificity factor subunit 3 (Fragment) OS=Mus musculus OX=10090 GN=Cpsf3 PE=1 SV=1	4	1	2	1	28		16638.5	24033.2	29054.2		15801.3	26223.4	116534	66512.2
High	Master Protein	Q99LC2	Cleavage stimulation factor subunit 1 OS=Mus musculus OX=10090 GN=Cstf1 PE=1 SV=1	4	2	2	2	48.4	Cstf1		8255.79	11489.7				972396	727150
High	Master Protein	Q80YC5	Coagulation factor XII OS=Mus musculus OX=10090 GN=F12 PE=1 SV=2	5	2	2	2	65.7	F12	143149	84739.6	35077.9			205295	3.05575e+06	774599
High	Master Protein	Q9JHH9	Coatomer subunit zeta-2 OS=Mus musculus OX=10090 GN=Copz2 PE=1 SV=1	14	2	2	2	22.9	Copz2							756822	548442
[truncated: 908 more rows]

## Sheet: KO
Protein FDR Confidence: Combined	Master	Accession	Description	Coverage [%]	# Peptides	# PSMs	# Unique Peptides	MW [kDa]	Gene Symbol	Abundance_867048	Abundance_867049	Abundance_867050	norm-ctrl1	norm-ctrol-2	norm-ctrl-3	WT average	Abundance_867051	Abundance_867052	Abundance_867053	norm-HA-1	norm-HA-2	norm-HA-3	average-HA	FC
High	Master Protein	P62631	Elongation factor 1-alpha 2 OS=Mus musculus OX=10090 GN=Eef1a2 PE=1 SV=1	30	12	245	1	50.4	Eef1a2				#VALUE!	#VALUE!	#VALUE!	#DIV/0!				#VALUE!	#VALUE!	#VALUE!	#DIV/0!	#DIV/0!
High	Master Protein	E9Q447	Spectrin alpha chain, non-erythrocytic 1 OS=Mus musculus OX=10090 GN=Sptan1 PE=1 SV=1	59	116	240	2	285.2	Spna2; Sptan1	47499.8		43743.9	0.000245715	#VALUE!	0.00140483	0.000825274				#VALUE!	#VALUE!	#VALUE!	#DIV/0!	#DIV/0!
High	Master Protein	P61979	Heterogeneous nuclear ribonucleoprotein K OS=Mus musculus OX=10090 GN=Hnrnpk PE=1 SV=1	67	30	219	1	50.9	Hnrnpk				#VALUE!	#VALUE!	#VALUE!	#DIV/0!		18356.5		#VALUE!	0.000136456	#VALUE!	0.000136456	#DIV/0!
High	Master Protein	A0A087WSN6	Fibronectin OS=Mus musculus OX=10090 GN=Fn1 PE=1 SV=1	38	55	213	1	252.9	Fn1				#VALUE!	#VALUE!	#VALUE!	#DIV/0!				#VALUE!	#VALUE!	#VALUE!	#DIV/0!	#DIV/0!
High	Master Protein	P62984	Ubiquitin-60S ribosomal protein L40 OS=Mus musculus OX=10090 GN=Uba52 PE=1 SV=2	51	9	159	1	14.7	Uba52; Gm11808				#VALUE!	#VALUE!	#VALUE!	#DIV/0!	375116			0.00654546	#VALUE!	#VALUE!	0.00654546	#DIV/0!
High	Master Protein	Q80X19	Collagen alpha-1(XIV) chain OS=Mus musculus OX=10090 GN=Col14a1 PE=1 SV=2	33	42	111	1	192.9	Col14a1				#VALUE!	#VALUE!	#VALUE!	#DIV/0!	45040.4	13386.8		0.000785917	9.95131e-05	#VALUE!	0.000442715	#DIV/0!
High	Master Protein	S4R2A9	Protein transport protein Sec31A (Fragment) OS=Mus musculus OX=10090 GN=Sec31a PE=1 SV=1	36	29	85	1	101		69090		79542.7	0.000357401	#VALUE!	0.00255451	0.00145596				#VALUE!	#VALUE!	#VALUE!	#DIV/0!	#DIV/0!
High	Master Protein	P27661	Histone H2AX OS=Mus musculus OX=10090 GN=H2ax PE=1 SV=2	32	6	65	1	15.1	H2afx		36735.7		#VALUE!	0.000362289	#VALUE!	0.000362289				#VALUE!	#VALUE!	#VALUE!	#DIV/0!	#DIV/0!
High	Master Protein	B1AR69	Myosin, heavy polypeptide 13, skeletal muscle OS=Mus musculus OX=10090 GN=Myh13 PE=1 SV=1	15	26	40	2	223.4	Myh13	10663.4			5.51616e-05	#VALUE!	#VALUE!	5.51616e-05				#VALUE!	#VALUE!	#VALUE!	#DIV/0!	#DIV/0!
High	Master Protein	Q6XLQ8	Calumenin OS=Mus musculus OX=10090 GN=Calu PE=1 SV=1	45	12	39	1	37.1	Calu				#VALUE!	#VALUE!	#VALUE!	#DIV/0!				#VALUE!	#VALUE!	#VALUE!	#DIV/0!	#DIV/0!
High	Master Protein	Q00898	Alpha-1-antitrypsin 1-5 OS=Mus musculus OX=10090 GN=Serpina1e PE=1 SV=1	28	10	37	3	45.9	Serpina1e				#VALUE!	#VALUE!	#VALUE!	#DIV/0!				#VALUE!	#VALUE!	#VALUE!	#DIV/0!	#DIV/0!
High	Master Protein	P58774	Tropomyosin beta chain OS=Mus musculus OX=10090 GN=Tpm2 PE=1 SV=1	58	21	36	1	32.8	Tpm2				#VALUE!	#VALUE!	#VALUE!	#DIV/0!		25264.5	19127.5	#VALUE!	0.000187808	7.27157e-05	0.000130262	#DIV/0!
High	Master Protein	A0A087WPH7	26S proteasome regulatory subunit 6A (Fragment) OS=Mus musculus OX=10090 GN=Psmc3 PE=1 SV=6	58	14	34	1	34			16754.1		#VALUE!	0.00016523	#VALUE!	0.00016523				#VALUE!	#VALUE!	#VALUE!	#DIV/0!	#DIV/0!
High	Master Protein	Q64522	Histone H2A type 2-B OS=Mus musculus OX=10090 GN=H2ac21 PE=1 SV=3	58	5	34	1	14	Hist2h2ab				#VALUE!	#VALUE!	#VALUE!	#DIV/0!			145612	#VALUE!	#VALUE!	0.000553565	0.000553565	#DIV/0!
High	Master Protein	G5E8G0	Heterogeneous nuclear ribonucleoprotein D0 OS=Mus musculus OX=10090 GN=Hnrnpd PE=1 SV=1	41	15	33	1	30.6	Hnrnpd				#VALUE!	#VALUE!	#VALUE!	#DIV/0!				#VALUE!	#VALUE!	#VALUE!	#DIV/0!	#DIV/0!
High	Master Protein	P97399	Dentin sialophosphoprotein OS=Mus musculus OX=10090 GN=Dspp PE=1 SV=2	11	6	30	6	93.9	Dspp				#VALUE!	#VALUE!	#VALUE!	#DIV/0!	8596.01	18386	1.02151e+06	0.000149993	0.000136676	0.0038834	0.00139002	#DIV/0!
High	Master Protein	P08553	Neurofilament medium polypeptide OS=Mus musculus OX=10090 GN=Nefm PE=1 SV=4	4	4	28	1	95.9	Nefm				#VALUE!	#VALUE!	#VALUE!	#DIV/0!			13838.3	#VALUE!	#VALUE!	5.26083e-05	5.26083e-05	#DIV/0!
High	Master Protein	F6VSK8	Integrin alpha-6 (Fragment) OS=Mus musculus OX=10090 GN=Itga6 PE=1 SV=1	27	15	25	1	75					#VALUE!	#VALUE!	#VALUE!	#DIV/0!			21202.9	#VALUE!	#VALUE!	8.06057e-05	8.06057e-05	#DIV/0!
High	Master Protein	Q02566	Myosin-6 OS=Mus musculus OX=10090 GN=Myh6 PE=1 SV=2	9	18	25	1	223.4	Myh6				#VALUE!	#VALUE!	#VALUE!	#DIV/0!			85879.2	#VALUE!	#VALUE!	0.000326481	0.000326481	#DIV/0!
High	Master Protein	Q9WV02	RNA-binding motif protein, X chromosome OS=Mus musculus OX=10090 GN=Rbmx PE=1 SV=1	21	8	19	1	42.3	Rbmx				#VALUE!	#VALUE!	#VALUE!	#DIV/0!				#VALUE!	#VALUE!	#VALUE!	#DIV/0!	#DIV/0!
High	Master Protein	A0A2I3BRT4	Epiplakin OS=Mus musculus OX=10090 GN=Eppk1 PE=1 SV=1	4	4	17	1	381.5					#VALUE!	#VALUE!	#VALUE!	#DIV/0!				#VALUE!	#VALUE!	#VALUE!	#DIV/0!	#DIV/0!
High	Master Protein	P47757	F-actin-capping protein subunit beta OS=Mus musculus OX=10090 GN=Capzb PE=1 SV=3	47	9	17	1	31.3	Capzb				#VALUE!	#VALUE!	#VALUE!	#DIV/0!				#VALUE!	#VALUE!	#VALUE!	#DIV/0!	#DIV/0!
High	Master Protein	Q9DBS1	Transmembrane protein 43 OS=Mus musculus OX=10090 GN=Tmem43 PE=1 SV=1	40	10	17	10	44.8	Tmem43				#VALUE!	#VALUE!	#VALUE!	#DIV/0!	10117.9		226566	0.00017655	#VALUE!	0.000861323	0.000518936	#DIV/0!
High	Master Protein	Q9CRA2	PDZ and LIM domain protein 5 OS=Mus musculus OX=10090 GN=Pdlim5 PE=1 SV=1	42	6	16	1	23.8	Pdlim5		4283.97		#VALUE!	4.22486e-05	#VALUE!	4.22486e-05				#VALUE!	#VALUE!	#VALUE!	#DIV/0!	#DIV/0!
High	Master Protein	Q6Q477	Plasma membrane calcium-transporting ATPase 4 OS=Mus musculus OX=10090 GN=Atp2b4 PE=1 SV=1	8	7	16	1	133	Atp2b4				#VALUE!	#VALUE!	#VALUE!	#DIV/0!				#VALUE!	#VALUE!	#VALUE!	#DIV/0!	#DIV/0!
High	Master Protein	Q9R1T4	Septin-6 OS=Mus musculus OX=10090 GN=Septin6 PE=1 SV=4	16	7	14	2	49.6	Sept6				#VALUE!	#VALUE!	#VALUE!	#DIV/0!		14922.3	18014	#VALUE!	0.000110928	6.84827e-05	8.97053e-05	#DIV/0!
High	Master Protein	D3YX76	Glutathione S-transferase OS=Mus musculus OX=10090 GN=Gstm2 PE=1 SV=1	30	5	13	2	21.7					#VALUE!	#VALUE!	#VALUE!	#DIV/0!			42193.1	#VALUE!	#VALUE!	0.000160403	0.000160403	#DIV/0!
High	Master Protein	Q9JHW9	Aldehyde dehydrogenase family 1 member A3 OS=Mus musculus OX=10090 GN=Aldh1a3 PE=1 SV=1	20	8	12	7	56.1	Aldh1a3				#VALUE!	#VALUE!	#VALUE!	#DIV/0!			14142.5	#VALUE!	#VALUE!	5.37645e-05	5.37645e-05	#DIV/0!
High	Master Protein	P45591	Cofilin-2 OS=Mus musculus OX=10090 GN=Cfl2 PE=1 SV=1	28	4	12	2	18.7	Cfl2				#VALUE!	#VALUE!	#VALUE!	#DIV/0!			29993.3	#VALUE!	#VALUE!	0.000114023	0.000114023	#DIV/0!
High	Master Protein	Q8VD75	Huntingtin-interacting protein 1 OS=Mus musculus OX=10090 GN=Hip1 PE=1 SV=2	8	8	12	8	115.1	Hip1				#VALUE!	#VALUE!	#VALUE!	#DIV/0!		9510.53	31065.9	#VALUE!	7.06984e-05	0.000118101	9.43999e-05	#DIV/0!
High	Master Protein	Q80V42	Carboxypeptidase M OS=Mus musculus OX=10090 GN=Cpm PE=1 SV=2	19	7	11	7	50.5	Cpm				#VALUE!	#VALUE!	#VALUE!	#DIV/0!			32028.8	#VALUE!	#VALUE!	0.000121762	0.000121762	#DIV/0!
High	Master Protein	Q9WUB3	Glycogen phosphorylase, muscle form OS=Mus musculus OX=10090 GN=Pygm PE=1 SV=3	10	7	11	3	97.2	Pygm				#VALUE!	#VALUE!	#VALUE!	#DIV/0!				#VALUE!	#VALUE!	#VALUE!	#DIV/0!	#DIV/0!
High	Master Protein	Q8BGN3	Glycerophosphocholine cholinephosphodiesterase ENPP6 OS=Mus musculus OX=10090 GN=Enpp6 PE=1 SV=1	17	6	10	6	50.6	Enpp6				#VALUE!	#VALUE!	#VALUE!	#DIV/0!	14371.5	19451.9	11013.6	0.00025077	0.0001446	4.18695e-05	0.000145746	#DIV/0!
High	Master Protein	Q3ULD5	Methylcrotonoyl-CoA carboxylase beta chain, mitochondrial OS=Mus musculus OX=10090 GN=Mccc2 PE=1 SV=1	20	8	10	8	61.3	Mccc2				#VALUE!	#VALUE!	#VALUE!	#DIV/0!			739568	#VALUE!	#VALUE!	0.00281157	0.00281157	#DIV/0!
High	Master Protein	Q8BQ46	TAF15 RNA polymerase II, TATA box binding protein (TBP)-associated factor OS=Mus musculus OX=10090 GN=Taf15 PE=1 SV=1	11	3	10	1	58.6	Taf15				#VALUE!	#VALUE!	#VALUE!	#DIV/0!				#VALUE!	#VALUE!	#VALUE!	#DIV/0!	#DIV/0!
High	Master Protein	P28650	Adenylosuccinate synthetase isozyme 1 OS=Mus musculus OX=10090 GN=Adss1 PE=1 SV=2	16	5	9	5	50.2	Adssl1				#VALUE!	#VALUE!	#VALUE!	#DIV/0!	36138.9		21549.6	0.000630594	#VALUE!	8.19236e-05	0.000356259	#DIV/0!
High	Master Protein	A0A140LHQ8	Phosphatidylinositol-binding clathrin assembly protein (Fragment) OS=Mus musculus OX=10090 GN=Picalm PE=1 SV=1	22	5	9	1	57	Picalm				#VALUE!	#VALUE!	#VALUE!	#DIV/0!				#VALUE!	#VALUE!	#VALUE!	#DIV/0!	#DIV/0!
High	Master Protein	Q9CQD1	Ras-related protein Rab-5A OS=Mus musculus OX=10090 GN=Rab5a PE=1 SV=1	27	5	9	3	23.6	Rab5a				#VALUE!	#VALUE!	#VALUE!	#DIV/0!				#VALUE!	#VALUE!	#VALUE!	#DIV/0!	#DIV/0!
High	Master Protein	O55137	Acyl-coenzyme A thioesterase 1 OS=Mus musculus OX=10090 GN=Acot1 PE=1 SV=1	12	4	8	1	46.1	Acot1				#VALUE!	#VALUE!	#VALUE!	#DIV/0!				#VALUE!	#VALUE!	#VALUE!	#DIV/0!	#DIV/0!
High	Master Protein	A0A5F8MPW1	Angiotensin 1-10 OS=Mus musculus OX=10090 GN=Agt PE=1 SV=1	14	4	8	4	52					#VALUE!	#VALUE!	#VALUE!	#DIV/0!			41734.7	#VALUE!	#VALUE!	0.00015866	0.00015866	#DIV/0!
High	Master Protein	Q9ET01	Glycogen phosphorylase, liver form OS=Mus musculus OX=10090 GN=Pygl PE=1 SV=4	4	4	8	1	97.4	Pygl				#VALUE!	#VALUE!	#VALUE!	#DIV/0!				#VALUE!	#VALUE!	#VALUE!	#DIV/0!	#DIV/0!
High	Master Protein	P97434	Myosin phosphatase Rho-interacting protein OS=Mus musculus OX=10090 GN=Mprip PE=1 SV=2	11	7	8	7	116.3	Mprip				#VALUE!	#VALUE!	#VALUE!	#DIV/0!	8509.83	25124.5		0.000148489	0.000186768	#VALUE!	0.000167629	#DIV/0!
High	Master Protein	Q64105	Sepiapterin reductase OS=Mus musculus OX=10090 GN=Spr PE=1 SV=1	32	6	8	6	27.9	Spr				#VALUE!	#VALUE!	#VALUE!	#DIV/0!			131002	#VALUE!	#VALUE!	0.000498023	0.000498023	#DIV/0!
High	Master Protein	Q61036	Serine/threonine-protein kinase PAK 3 OS=Mus musculus OX=10090 GN=Pak3 PE=1 SV=2	9	5	8	1	62.4	Pak3				#VALUE!	#VALUE!	#VALUE!	#DIV/0!				#VALUE!	#VALUE!	#VALUE!	#DIV/0!	#DIV/0!
High	Master Protein	Q3UDC3	Target of Myb protein 1 OS=Mus musculus OX=10090 GN=Tom1 PE=1 SV=1	16	5	8	5	57.1	Tom1				#VALUE!	#VALUE!	#VALUE!	#DIV/0!	9402.7		9645.74	0.000164069	#VALUE!	3.66696e-05	0.000100369	#DIV/0!
High	Master Protein	O89079	Coatomer subunit epsilon OS=Mus musculus OX=10090 GN=Cope PE=1 SV=3	18	3	7	3	34.5	Cope				#VALUE!	#VALUE!	#VALUE!	#DIV/0!	39660.7		78504.7	0.000692046	#VALUE!	0.000298446	0.000495246	#DIV/0!
High	Master Protein	Q8BPU7	Engulfment and cell motility protein 1 OS=Mus musculus OX=10090 GN=Elmo1 PE=1 SV=2	10	6	7	6	83.9	Elmo1				#VALUE!	#VALUE!	#VALUE!	#DIV/0!	13464.8	10368.1	30051.8	0.00023495	7.7073e-05	0.000114246	0.00014209	#DIV/0!
High	Master Protein	Q8K009	Mitochondrial 10-formyltetrahydrofolate dehydrogenase OS=Mus musculus OX=10090 GN=Aldh1l2 PE=1 SV=2	10	6	7	6	101.5	Aldh1l2				#VALUE!	#VALUE!	#VALUE!	#DIV/0!	9598.13			0.000167479	#VALUE!	#VALUE!	0.000167479	#DIV/0!
High	Master Protein	P55258	Ras-related protein Rab-8A OS=Mus musculus OX=10090 GN=Rab8a PE=1 SV=2	27	5	7	3	23.7	Rab8a				#VALUE!	#VALUE!	#VALUE!	#DIV/0!		9020.75		#VALUE!	6.70576e-05	#VALUE!	6.70576e-05	#DIV/0!
High	Master Protein	P58389	Serine/threonine-protein phosphatase 2A activator OS=Mus musculus OX=10090 GN=Ptpa PE=1 SV=1	20	4	7	4	36.7	Ppp2r4; Ptpa				#VALUE!	#VALUE!	#VALUE!	#DIV/0!	181559	32250.7	14175.4	0.00316806	0.000239742	5.38899e-05	0.0011539	#DIV/0!
High	Master Protein	Q9WTR5	Cadherin-13 OS=Mus musculus OX=10090 GN=Cdh13 PE=1 SV=2	8	4	6	4	78.1	Cdh13				#VALUE!	#VALUE!	#VALUE!	#DIV/0!				#VALUE!	#VALUE!	#VALUE!	#DIV/0!	#DIV/0!
High	Master Protein	O35206	Collagen alpha-1(XV) chain OS=Mus musculus OX=10090 GN=Col15a1 PE=1 SV=2	4	4	6	4	140.4	Col15a1				#VALUE!	#VALUE!	#VALUE!	#DIV/0!	149147			0.00260249	#VALUE!	#VALUE!	0.00260249	#DIV/0!
High	Master Protein	Q3TYJ3	Cytoplasmic dynein 1 intermediate chain 1 OS=Mus musculus OX=10090 GN=Dync1i1 PE=1 SV=1	6	4	6	2	69.6	Dync1i1	13947.8		24116.4	7.21515e-05	#VALUE!	0.000774497	0.000423324				#VALUE!	#VALUE!	#VALUE!	#DIV/0!	#DIV/0!
High	Master Protein	Q8BH64	EH domain-containing protein 2 OS=Mus musculus OX=10090 GN=Ehd2 PE=1 SV=1	6	3	6	2	61.1	Ehd2		8716.52	8173.49	#VALUE!	8.59625e-05	0.000262491	0.000174227				#VALUE!	#VALUE!	#VALUE!	#DIV/0!	#DIV/0!
High	Master Protein	Q91X78	Erlin-1 OS=Mus musculus OX=10090 GN=Erlin1 PE=1 SV=2	10	3	6	1	39.2					#VALUE!	#VALUE!	#VALUE!	#DIV/0!				#VALUE!	#VALUE!	#VALUE!	#DIV/0!	#DIV/0!
High	Master Protein	Q5MJS3	Extracellular serine/threonine protein kinase FAM20C OS=Mus musculus OX=10090 GN=Fam20c PE=1 SV=1	11	4	6	3	65.7	Fam20c				#VALUE!	#VALUE!	#VALUE!	#DIV/0!			12153.5	#VALUE!	#VALUE!	4.62033e-05	4.62033e-05	#DIV/0!
High	Master Protein	A0A0A0MQ68	Glutaryl-CoA dehydrogenase, mitochondrial OS=Mus musculus OX=10090 GN=Gcdh PE=1 SV=1	13	4	6	4	49.5	Gcdh				#VALUE!	#VALUE!	#VALUE!	#DIV/0!		15663.4	58730.2	#VALUE!	0.000116437	0.000223271	0.000169854	#DIV/0!
High	Master Protein	B2RSH2	Guanine nucleotide-binding protein G(i) subunit alpha-1 OS=Mus musculus OX=10090 GN=Gnai1 PE=1 SV=1	13	4	6	1	40.3	Gnai1				#VALUE!	#VALUE!	#VALUE!	#DIV/0!				#VALUE!	#VALUE!	#VALUE!	#DIV/0!	#DIV/0!
High	Master Protein	P85094	Isochorismatase domain-containing protein 2A OS=Mus musculus OX=10090 GN=Isoc2a PE=1 SV=1	32	3	6	3	22.4	Isoc2a				#VALUE!	#VALUE!	#VALUE!	#DIV/0!				#VALUE!	#VALUE!	#VALUE!	#DIV/0!	#DIV/0!
High	Master Protein	Q14BI5	Myomesin 2 OS=Mus musculus OX=10090 GN=Myom2 PE=1 SV=1	7	6	6	6	164.6	Myom2				#VALUE!	#VALUE!	#VALUE!	#DIV/0!	263276		4321.6	0.00459394	#VALUE!	1.64291e-05	0.00230518	#DIV/0!
High	Master Protein	Q8VBW6	NEDD8-activating enzyme E1 regulatory subunit OS=Mus musculus OX=10090 GN=Nae1 PE=1 SV=1	8	4	6	4	60.2	Nae1				#VALUE!	#VALUE!	#VALUE!	#DIV/0!				#VALUE!	#VALUE!	#VALUE!	#DIV/0!	#DIV/0!
High	Master Protein	Q9JHP7	Protein O-glucosyltransferase 2 OS=Mus musculus OX=10090 GN=Poglut2 PE=1 SV=1	8	3	6	3	57.9	Kdelc1				#VALUE!	#VALUE!	#VALUE!	#DIV/0!	9112.91			0.000159013	#VALUE!	#VALUE!	0.000159013	#DIV/0!
High	Master Protein	O88643	Serine/threonine-protein kinase PAK 1 OS=Mus musculus OX=10090 GN=Pak1 PE=1 SV=1	10	4	6	3	60.7	Pak1				#VALUE!	#VALUE!	#VALUE!	#DIV/0!				#VALUE!	#VALUE!	#VALUE!	#DIV/0!	#DIV/0!
High	Master Protein	D3YTS9	Testicular acid phosphatase OS=Mus musculus OX=10090 GN=Acp4 PE=1 SV=2	20	4	6	4	46.4	Acpt; Acp4				#VALUE!	#VALUE!	#VALUE!	#DIV/0!				#VALUE!	#VALUE!	#VALUE!	#DIV/0!	#DIV/0!
High	Master Protein	F6V6T4	Transmembrane emp24 domain-containing protein 2 (Fragment) OS=Mus musculus OX=10090 GN=Tmed2 PE=1 SV=1	13	2	6	2	20					#VALUE!	#VALUE!	#VALUE!	#DIV/0!			207135	#VALUE!	#VALUE!	0.000787453	0.000787453	#DIV/0!
High	Master Protein	F7AI87	26S proteasome non-ATPase regulatory subunit 4 (Fragment) OS=Mus musculus OX=10090 GN=Psmd4 PE=1 SV=1	24	3	5	1	21.3					#VALUE!	#VALUE!	#VALUE!	#DIV/0!				#VALUE!	#VALUE!	#VALUE!	#DIV/0!	#DIV/0!
High	Master Protein	Q64010	Adapter molecule crk OS=Mus musculus OX=10090 GN=Crk PE=1 SV=1	15	3	5	3	33.8	Crk				#VALUE!	#VALUE!	#VALUE!	#DIV/0!				#VALUE!	#VALUE!	#VALUE!	#DIV/0!	#DIV/0!
High	Master Protein	P11609	Antigen-presenting glycoprotein CD1d1 OS=Mus musculus OX=10090 GN=Cd1d1 PE=1 SV=3	13	3	5	3	38.5	Cd1d1				#VALUE!	#VALUE!	#VALUE!	#DIV/0!			13549.9	#VALUE!	#VALUE!	5.15118e-05	5.15118e-05	#DIV/0!
High	Master Protein	P04919	Band 3 anion transport protein OS=Mus musculus OX=10090 GN=Slc4a1 PE=1 SV=1	2	2	5	2	103.1	Slc4a1				#VALUE!	#VALUE!	#VALUE!	#DIV/0!			5533.69	#VALUE!	#VALUE!	2.10371e-05	2.10371e-05	#DIV/0!
High	Master Protein	E0CXB9	Catenin alpha-2 OS=Mus musculus OX=10090 GN=Ctnna2 PE=1 SV=1	5	4	5	1	106.7	Ctnna2				#VALUE!	#VALUE!	#VALUE!	#DIV/0!			17937.1	#VALUE!	#VALUE!	6.81902e-05	6.81902e-05	#DIV/0!
High	Master Protein	Q9QXE7	F-box-like/WD repeat-containing protein TBL1X OS=Mus musculus OX=10090 GN=Tbl1x PE=1 SV=2	13	4	5	1	56.8	Tbl1x	437260	12415	94639.2	0.00226194	0.000122437	0.00303933	0.0018079				#VALUE!	#VALUE!	#VALUE!	#DIV/0!	#DIV/0!
High	Master Protein	Q8BHJ5	F-box-like/WD repeat-containing protein TBL1XR1 OS=Mus musculus OX=10090 GN=Tbl1xr1 PE=1 SV=1	14	4	5	1	55.6	Tbl1xr1				#VALUE!	#VALUE!	#VALUE!	#DIV/0!				#VALUE!	#VALUE!	#VALUE!	#DIV/0!	#DIV/0!
High	Master Protein	Q6NWW9	Fibronectin type III domain-containing protein 3B OS=Mus musculus OX=10090 GN=Fndc3b PE=1 SV=1	3	3	5	3	132.7	Fndc3b		13583.6		#VALUE!	0.000133961	#VALUE!	0.000133961				#VALUE!	#VALUE!	#VALUE!	#DIV/0!	#DIV/0!
High	Master Protein	D3Z3N4	Heterogeneous nuclear ribonucleoprotein H3 OS=Mus musculus OX=10090 GN=Hnrnph3 PE=1 SV=1	10	3	5	3	36.8	Hnrnph3				#VALUE!	#VALUE!	#VALUE!	#DIV/0!	36317.2	64316	8197.84	0.000633705	0.000478106	3.11652e-05	0.000380992	#DIV/0!
High	Master Protein	Q4FJZ2	Importin subunit alpha OS=Mus musculus OX=10090 GN=Kpna6 PE=1 SV=1	10	3	5	2	59.6	Kpna6				#VALUE!	#VALUE!	#VALUE!	#DIV/0!			20451.4	#VALUE!	#VALUE!	7.77487e-05	7.77487e-05	#DIV/0!
High	Master Protein	Q61789	Laminin subunit alpha-3 OS=Mus musculus OX=10090 GN=Lama3 PE=1 SV=4	2	4	5	4	366	Lama3	9203.97			4.76119e-05	#VALUE!	#VALUE!	4.76119e-05				#VALUE!	#VALUE!	#VALUE!	#DIV/0!	#DIV/0!
High	Master Protein	Q8BTZ7	Mannose-1-phosphate guanyltransferase beta OS=Mus musculus OX=10090 GN=Gmppb PE=1 SV=1	12	3	5	3	39.9	Gmppb				#VALUE!	#VALUE!	#VALUE!	#DIV/0!			41309.4	#VALUE!	#VALUE!	0.000157043	0.000157043	#DIV/0!
High	Master Protein	Z4YJF5	Myomesin-1 OS=Mus musculus OX=10090 GN=Myom1 PE=1 SV=1	3	5	5	5	175.4					#VALUE!	#VALUE!	#VALUE!	#DIV/0!				#VALUE!	#VALUE!	#VALUE!	#DIV/0!	#DIV/0!
High	Master Protein	B1AY85	Plexin domain-containing protein 2 OS=Mus musculus OX=10090 GN=Plxdc2 PE=1 SV=1	8	3	5	3	59.4	Plxdc2				#VALUE!	#VALUE!	#VALUE!	#DIV/0!	5424.49	21780.7		9.46528e-05	0.000161911	#VALUE!	0.000128282	#DIV/0!
High	Master Protein	E9Q8B6	Predicted gene 4788 OS=Mus musculus OX=10090 GN=Gm4788 PE=1 SV=1	4	3	5	1	92.8	Gm4788			14559	#VALUE!	#VALUE!	0.000467562	0.000467562				#VALUE!	#VALUE!	#VALUE!	#DIV/0!	#DIV/0!
High	Master Protein	Q01730	Ras suppressor protein 1 OS=Mus musculus OX=10090 GN=Rsu1 PE=1 SV=3	10	2	5	2	31.5	Rsu1				#VALUE!	#VALUE!	#VALUE!	#DIV/0!				#VALUE!	#VALUE!	#VALUE!	#DIV/0!	#DIV/0!
High	Master Protein	Q67BT3	Solute carrier family 13 member 5 OS=Mus musculus OX=10090 GN=Slc13a5 PE=2 SV=1	4	3	5	3	63.8	Slc13a5				#VALUE!	#VALUE!	#VALUE!	#DIV/0!	30006.7		7929.5	0.000523592	#VALUE!	3.01451e-05	0.000276869	#DIV/0!
High	Master Protein	P52875	Transmembrane protein 165 OS=Mus musculus OX=10090 GN=Tmem165 PE=1 SV=2	19	3	5	3	34.8	Tmem165				#VALUE!	#VALUE!	#VALUE!	#DIV/0!			83241.1	#VALUE!	#VALUE!	0.000316452	0.000316452	#DIV/0!
High	Master Protein	Q9QY76	Vesicle-associated membrane protein-associated protein B OS=Mus musculus OX=10090 GN=Vapb PE=1 SV=3	12	3	5	2	26.9	Vapb				#VALUE!	#VALUE!	#VALUE!	#DIV/0!			24274.3	#VALUE!	#VALUE!	9.22821e-05	9.22821e-05	#DIV/0!
High	Master Protein	G5E8W8	Zinc finger protein 185 OS=Mus musculus OX=10090 GN=Zfp185 PE=1 SV=1	11	4	5	4	52.8	Zfp185				#VALUE!	#VALUE!	#VALUE!	#DIV/0!				#VALUE!	#VALUE!	#VALUE!	#DIV/0!	#DIV/0!
High	Master Protein	O89020	Afamin OS=Mus musculus OX=10090 GN=Afm PE=1 SV=2	5	3	4	3	69.3	Afm				#VALUE!	#VALUE!	#VALUE!	#DIV/0!				#VALUE!	#VALUE!	#VALUE!	#DIV/0!	#DIV/0!
High	Master Protein	P28474	Alcohol dehydrogenase class-3 OS=Mus musculus OX=10090 GN=Adh5 PE=1 SV=3	13	2	4	2	39.5	Adh5				#VALUE!	#VALUE!	#VALUE!	#DIV/0!				#VALUE!	#VALUE!	#VALUE!	#DIV/0!	#DIV/0!
High	Master Protein	A0A0R4IZW5	Cadherin-1 OS=Mus musculus OX=10090 GN=Cdh1 PE=1 SV=1	5	3	4	3	98.2	Cdh1		11394.1	21053.1	#VALUE!	0.000112369	0.000676121	0.000394245				#VALUE!	#VALUE!	#VALUE!	#DIV/0!	#DIV/0!
High	Master Protein	P61924	Coatomer subunit zeta-1 OS=Mus musculus OX=10090 GN=Copz1 PE=1 SV=1	21	3	4	3	20.2	Copz1				#VALUE!	#VALUE!	#VALUE!	#DIV/0!		60050.8		#VALUE!	0.000446399	#VALUE!	0.000446399	#DIV/0!
High	Master Protein	Q63870	Collagen alpha-1(VII) chain OS=Mus musculus OX=10090 GN=Col7a1 PE=1 SV=3	2	3	4	3	295.1	Col7a1				#VALUE!	#VALUE!	#VALUE!	#DIV/0!				#VALUE!	#VALUE!	#VALUE!	#DIV/0!	#DIV/0!
High	Master Protein	Q921L5	Conserved oligomeric Golgi complex subunit 2 OS=Mus musculus OX=10090 GN=Cog2 PE=1 SV=2	8	4	4	4	82	Cog2	19881.9		18472.8	0.000102849	#VALUE!	0.000593253	0.000348051				#VALUE!	#VALUE!	#VALUE!	#DIV/0!	#DIV/0!
High	Master Protein	Q06770	Corticosteroid-binding globulin OS=Mus musculus OX=10090 GN=Serpina6 PE=1 SV=1	10	3	4	3	44.7	Serpina6				#VALUE!	#VALUE!	#VALUE!	#DIV/0!	7191.58	26786.4		0.000125487	0.000199122	#VALUE!	0.000162305	#DIV/0!
High	Master Protein	P97792	Coxsackievirus and adenovirus receptor homolog OS=Mus musculus OX=10090 GN=Cxadr PE=1 SV=1	9	3	4	3	39.9	Cxadr				#VALUE!	#VALUE!	#VALUE!	#DIV/0!	15696.2			0.000273885	#VALUE!	#VALUE!	0.000273885	#DIV/0!
High	Master Protein	Q9CQ69	Cytochrome b-c1 complex subunit 8 OS=Mus musculus OX=10090 GN=Uqcrq PE=1 SV=3	26	2	4	2	9.8	Uqcrq	66311.9			0.00034303	#VALUE!	#VALUE!	0.00034303				#VALUE!	#VALUE!	#VALUE!	#DIV/0!	#DIV/0!
High	Master Protein	P55850	Desmocollin-3 OS=Mus musculus OX=10090 GN=Dsc3 PE=1 SV=3	6	3	4	3	100.1	Dsc3				#VALUE!	#VALUE!	#VALUE!	#DIV/0!	34735.2	16035.2	9012.17	0.0006061	0.000119201	3.4261e-05	0.000253187	#DIV/0!
High	Master Protein	P28352	DNA-(apurinic or apyrimidinic site) endonuclease OS=Mus musculus OX=10090 GN=Apex1 PE=1 SV=2	15	3	4	3	35.5	Apex1				#VALUE!	#VALUE!	#VALUE!	#DIV/0!		27343		#VALUE!	0.00020326	#VALUE!	0.00020326	#DIV/0!
High	Master Protein	Q60611	DNA-binding protein SATB1 OS=Mus musculus OX=10090 GN=Satb1 PE=1 SV=2	10	4	4	4	85.8	Satb1				#VALUE!	#VALUE!	#VALUE!	#DIV/0!			15702.8	#VALUE!	#VALUE!	5.96962e-05	5.96962e-05	#DIV/0!
[truncated: 2,813 more rows]

## Sheet: KO1 normalized
Protein FDR Confidence: Combined	Master	Accession	Description	Coverage [%]	# Peptides	# PSMs	# Unique Peptides	MW [kDa]	Gene Symbol	Fold Change
[truncated: 2,198 more rows]

[truncated: 1 more sheets: ENAM HomoVSWT]
