# Supplementary material for: Din Oversees Mesenchymal Stem Cell Homeostasis in Mouse Incisors
Source: Research Square preprint supplement (doi:10.21203/rs.3.rs-6568233/v1), 2025-05-14
Supplement: Supplementary file 2 [file e938fb23161abdf6f3428ff7.xlsx]

## Sheet: All Genes
gene	p_val	avg_log2FC	abs_log2FC	avg_1_KO	avg_2_WT	pct_1_KO	pct_2_WT	p_val_adj	stats
Gm42031	0.00021786	-4.33875	4.33875	0.00011093	0.00224461	0.000223314	0.00368369	0.00122934	1.91141e+07
Crhbp	8.95103e-05	-4.24749	4.24749	0.000298369	0.0056673	0.000893256	0.00564833	0.00056098	19102294
Hemgn	3.46669e-06	-3.91354	3.91354	0.000444445	0.00669748	0.000893256	0.00712181	3.09136e-05	19088872
Gm10874	0.00138925	-3.85739	3.85739	0.000154272	0.00223603	0.000446628	0.00343811	0.00617145	19118410
Cbln1	6.92571e-13	-3.53018	3.53018	0.00140904	0.0162785	0.00267977	0.0181729	1.88857e-11	19004213
Cldn13	0.000145687	-3.25743	3.25743	0.000320317	0.00306313	0.000446628	0.00442043	0.000862008	19109461
Clec2g	0.0119275	-3.19439	3.19439	0.000251934	0.00230619	0.000669942	0.00294695	0.0378522	1.91249e+07
Gm26760	1.00991e-05	-3.04045	3.04045	0.0006974	0.00573783	0.00133988	0.00761297	8.14762e-05	19088470
Stfa1	5.08899e-11	-2.93686	2.93686	0.00173237	0.0132655	0.00200983	0.0147348	1.08535e-09	19029660
Kcne3	0.0140486	-2.78086	2.78086	0.000538981	0.00370422	0.00111657	0.00368369	0.043357	1.91223e+07
Camp	3.54854e-27	-2.57368	2.57368	0.00577749	0.034395	0.0080393	0.0449411	3.31994e-25	1.88089e+07
Ly6d	0.000136078	-2.55176	2.55176	0.00278119	0.0163074	0.00267977	0.00884086	0.000811675	19089408
Cstdc4	0.000106734	-2.52813	2.52813	0.00141493	0.00816165	0.00178651	0.00736739	0.000656293	19094801
Spta1	0.000373872	-2.49053	2.49053	0.00096123	0.00540197	0.00133988	0.00589391	0.00195647	19104152
Ces2g	0.0227247	-2.48529	2.48529	0.00048012	0.00268842	0.00111657	0.00343811	0.0640601	19124510
Tbx15	0.00617989	-2.45743	2.45743	0.000475268	0.00261035	0.000893256	0.00368369	0.0219101	19120233
Rgs8	0.0103184	-2.43487	2.43487	0.000292755	0.00158298	0.000893256	0.00343811	0.0335634	19122477
Gm36529	0.00410477	-2.42193	2.42193	0.000307691	0.00164888	0.000669942	0.00343811	0.015533	19120447
Gm35692	0.0687877	-2.41612	2.41612	0.000342697	0.00182909	0.00133988	0.00319253	0.155945	19128770
Lipc	0.0143925	-2.3745	2.3745	0.000865855	0.00448994	0.0015632	0.00442043	0.0442008	19119599
Kel	0.00117668	-2.36449	2.36449	0.00071498	0.00368193	0.00178651	0.00613949	0.00533493	19105969
Gm15326	0.0103249	-2.36221	2.36221	0.00043719	0.00224785	0.000893256	0.00343811	0.0335753	19122479
Gm7125	0.000619551	-2.28494	2.28494	0.000766169	0.00373388	0.00133988	0.00564833	0.0030641	19106397
Kif28	0.0171134	-2.28209	2.28209	0.00048545	0.00236114	0.000893256	0.00319253	0.050949	19124719
Hsbp1l1	0.0286421	-2.28003	2.28003	0.000601436	0.0029211	0.00133988	0.00368369	0.0773812	19124302
Nr0b1	7.82505e-37	-2.27459	2.27459	0.0161348	0.0780696	0.0129522	0.0655697	1.20463e-34	18666916
Gm28913	0.00193811	-2.27337	2.27337	0.000798479	0.00386026	0.00111657	0.00466601	0.00816823	1.91133e+07
Stfa2l1	0.00015616	-2.19267	2.19267	0.00103871	0.00474847	0.000669942	0.00491159	0.00091597	19107022
Tal1	0.0114261	-2.16536	2.16536	0.000735117	0.00329758	0.00178651	0.00491159	0.0365006	19117157
Iglc2	0.000215446	-2.11104	2.11104	0.00393187	0.0169857	0.00267977	0.00859528	0.00121693	19091673
Lcn2	8.50762e-08	-2.10773	2.10773	0.00242242	0.010441	0.0031264	0.0135069	1.05159e-06	19051075
Adamts16	9.80195e-20	-2.10129	2.10129	0.0077502	0.0332555	0.0111657	0.0424853	5.51449e-18	18859585
Slc38a5	0.00102345	-2.09206	2.09206	0.000766166	0.0032666	0.00133988	0.00540275	0.00474045	19108645
Slc27a2	0.00704399	-2.07957	2.07957	0.000648598	0.00274151	0.000669942	0.00319253	0.0243982	1.91227e+07
Gm9999	0.0458712	-2.06683	2.06683	0.000399318	0.001673	0.000893256	0.00270138	0.113003	19129192
Miat	4.2791e-06	-2.03611	2.03611	0.00160322	0.00657542	0.00357302	0.012279	3.72365e-05	19066248
Gpr88	0.0761983	-1.99896	1.99896	0.000720847	0.00288132	0.00223314	0.00442043	0.168782	19125687
Foxp2	0.0177139	-1.98332	1.98332	0.00102202	0.0040411	0.00178651	0.00466601	0.0522865	19119418
4930527J03Rik	0.0103579	-1.97478	1.97478	0.000532037	0.00209127	0.000893256	0.00343811	0.0336467	19122489
Gm14236	0.0530415	-1.96736	1.96736	0.000328914	0.00128622	0.0015632	0.00368369	0.126991	1.91263e+07
Gm29675	0.0581196	-1.92833	1.92833	0.000992734	0.00377849	0.00334971	0.00613949	0.136618	1.91202e+07
Fcmr	2.46022e-05	-1.92217	1.92217	0.00246098	0.0093269	0.0031264	0.0105599	0.000180274	19077912
Npffr1	0.00102182	-1.89015	1.89015	0.00188927	0.00700303	0.00245645	0.00736739	0.00473678	19100891
Psg16	0.0575664	-1.88313	1.88313	0.000553586	0.00204203	0.00111657	0.00294695	0.1356	19128987
Epb42	0.0286868	-1.86238	1.86238	0.000938916	0.00341397	0.00133988	0.00368369	0.0774649	19124308
Olfr57	1.5786e-11	-1.83746	1.83746	0.00618189	0.0220929	0.00781599	0.0265226	3.5882e-10	18975018
Cldn5	6.21304e-05	-1.82928	1.82928	0.00296161	0.0105244	0.00357302	0.0108055	0.000407008	19079688
Fam83a	0.157816	-1.81156	1.81156	0.000731505	0.00256774	0.00133988	0.00270138	0.291234	19133266
Gm37035	4.88905e-05	-1.78778	1.78778	0.00262527	0.00906459	0.00468959	0.0127701	0.00033024	19071921
Ms4a4a	0.173871	-1.78323	1.78323	0.000620001	0.00213403	0.0015632	0.00294695	0.312379	19133046
Rhag	0.000424244	-1.74953	1.74953	0.00123819	0.0041634	0.00111657	0.00540275	0.00219497	19106646
Pabpc1l	0.0066969	-1.73781	1.73781	0.00110863	0.00369759	0.00267977	0.00663065	0.0233922	19109614
Gm13840	0.0459239	-1.73547	1.73547	0.000611164	0.0020351	0.000893256	0.00270138	0.1131	19129196
Exoc3l	0.0610324	-1.73318	1.73318	0.000825667	0.00274501	0.00178651	0.00392927	0.141909	19126121
Grap2	0.0460162	-1.72987	1.72987	0.000520772	0.00172739	0.000893256	0.00270138	0.113278	19129203
Gm38250	0.0115188	-1.72104	1.72104	0.00111244	0.00366741	0.00178651	0.00491159	0.03675	19117189
Gm36325	0.079939	-1.7208	1.7208	0.000635198	0.00209373	0.0015632	0.00343811	0.175257	19128576
Ngp	3.30636e-12	-1.71587	1.71587	0.00634658	0.0208482	0.00692273	0.0257859	8.20966e-11	1.89737e+07
Gm10320	0.00366981	-1.71076	1.71076	0.000787423	0.0025775	0.0015632	0.00515717	0.0141334	1.91129e+07
Ano5	0.00275854	-1.70471	1.70471	0.00118529	0.0038636	0.00133988	0.00491159	0.011101	19113147
Gm13710	0.0141391	-1.69722	1.69722	0.000588976	0.0019099	0.00111657	0.00368369	0.0435813	1.91223e+07
Vmn1r183	0.118933	-1.69412	1.69412	0.000855758	0.00276906	0.0015632	0.00319253	0.236053	1.91308e+07
Carmil2	0.0348593	-1.67424	1.67424	0.000635713	0.00202888	0.0015632	0.00392927	0.0905934	19124111
Glt1d1	0.0801684	-1.65973	1.65973	0.000733338	0.00231703	0.0015632	0.00343811	0.175511	19128589
Spata9	0.368043	-1.65164	1.65164	0.0006107	0.00191877	0.00178651	0.00270138	0.532415	19137320
Stxbp5l	0.0576861	-1.64674	1.64674	0.000624706	0.00195611	0.00111657	0.00294695	0.13575	19128995
Sost	0.000263264	-1.64357	1.64357	0.00517082	0.0161556	0.00424297	0.0110511	0.00144979	1.90836e+07
Iglc3	0.0251362	-1.63868	1.63868	0.00421016	0.0131097	0.00379634	0.00736739	0.0694723	19112999
Gm12248	0.0287017	-1.62454	1.62454	0.0010336	0.00318702	0.00133988	0.00368369	0.0774928	19124310
Syt1	4.63062e-10	-1.60551	1.60551	0.00856521	0.0260642	0.00982582	0.0279961	8.32431e-09	1.898e+07
BC051537	0.139548	-1.60072	1.60072	0.000399792	0.00121255	0.00111657	0.0024558	0.265847	19133481
Trim30c	0.0287316	-1.60013	1.60013	0.000951128	0.00288354	0.00133988	0.00368369	0.0775364	19124314
Gm15524	0.069149	-1.59262	1.59262	0.000540781	0.00163098	0.00133988	0.00319253	0.156588	19128792
Vmn2r76	0.139321	-1.59223	1.59223	0.000720244	0.00217164	0.00111657	0.0024558	0.265742	19133474
Spata20	0.13903	-1.59073	1.59073	0.000390893	0.00117737	0.00111657	0.0024558	0.265516	19133465
Clec12a	0.0163925	-1.58959	1.58959	0.00236509	0.00711807	0.00357302	0.00736739	0.0491834	19111025
Nxpe2	0.0588458	-1.58444	1.58444	0.0014561	0.00436672	0.00245645	0.00491159	0.137942	19123268
Gm17324	0.0529618	-1.57356	1.57356	0.00104721	0.00311689	0.00223314	0.00466601	0.126854	19123474
Gm16299	0.105174	-1.57043	1.57043	0.000724823	0.00215268	0.00133988	0.00294695	0.214606	19131026
Hist1h4n	1.38254e-05	-1.56944	1.56944	0.00213603	0.00633951	0.00379634	0.0120334	0.000108603	1.90706e+07
Gm32687	2.97269e-12	-1.5656	1.5656	0.00736224	0.0217923	0.00937919	0.0302063	7.44667e-11	18956117
Adad1	0.174075	-1.55705	1.55705	0.000645944	0.00190069	0.0015632	0.00294695	0.312597	19133052
C530043A13Rik	0.118933	-1.55459	1.55459	0.000709965	0.00208553	0.0015632	0.00319253	0.236053	1.91308e+07
Gm49422	0.23242	-1.54923	1.54923	0.000691862	0.00202481	0.00133988	0.0024558	0.385577	19135499
Gm14393	0.0454012	-1.54642	1.54642	0.00133927	0.00391189	0.00357302	0.00663065	0.112073	19117743
Gm39090	0.109425	-1.54459	1.54459	0.00124144	0.00362154	0.00223314	0.00417485	0.221253	19127956
Car10	3.85965e-10	-1.5407	1.5407	0.00852284	0.024796	0.0096025	0.0277505	7.06588e-09	18980273
Smbd1	0.0365015	-1.53983	1.53983	0.00101656	0.00295576	0.00111657	0.00319253	0.0940387	1.91268e+07
Ctse	0.00451867	-1.53883	1.53883	0.00159807	0.00464334	0.00267977	0.00687623	0.0168215	19107433
Snph	0.00415283	-1.52945	1.52945	0.00154809	0.00446895	0.0031264	0.00761297	0.0156677	19104741
Slc25a31	0.118908	-1.52893	1.52893	0.000894602	0.00258156	0.0015632	0.00319253	0.236053	1.91308e+07
Gm46332	0.0164915	-1.5276	1.5276	0.00150836	0.00434867	0.00223314	0.00540275	0.0494278	19116780
Adgrl4	0.00601756	-1.52536	1.52536	0.00255609	0.0073579	0.00446628	0.00933202	0.0214079	19101173
Gm41804	0.00591141	-1.5225	1.5225	0.00136892	0.00393275	0.00200983	0.00564833	0.0210789	1.91125e+07
Ushbp1	0.00141646	-1.52044	1.52044	0.00252455	0.00724238	0.00446628	0.0103143	0.00627259	19092229
Gm35229	0.105174	-1.51749	1.51749	0.000606262	0.00173568	0.00133988	0.00294695	0.214606	19131026
Gm2694	0.0047193	-1.51174	1.51174	0.00130011	0.00370731	0.00178651	0.00540275	0.0174452	19112701
Gm45168	0.139256	-1.50581	1.50581	0.000627139	0.00178098	0.00111657	0.0024558	0.265679	19133472
Ccdc116	0.117749	-1.50398	1.50398	0.000935042	0.00265201	0.00245645	0.00442043	0.234335	19127732
Adh1	0.517778	-1.496	1.496	0.00101488	0.00286257	0.00245645	0.00319253	0.670085	1.91389e+07
Phospho1	0.0905061	-1.49405	1.49405	0.000683173	0.00192436	0.00178651	0.00368369	0.192252	19128378
Vmn1r13	8.32345e-09	-1.48347	1.48347	0.00982023	0.0274594	0.0109424	0.0279961	1.24294e-07	18990114
Meox2	0.0691819	-1.47664	1.47664	0.00194665	0.00541752	0.00133988	0.00319253	0.156642	19128794
Slc4a1	4.15474e-06	-1.47418	1.47418	0.00598516	0.0166283	0.00714605	0.0181729	3.62849e-05	19045115
Gm35082	1.24005e-09	-1.4731	1.4731	0.00502824	0.0139593	0.00647611	0.0218566	2.08117e-08	1.90058e+07
Gys2	0.014528	-1.46361	1.46361	0.000758271	0.0020913	0.0015632	0.00442043	0.0444957	19119635
Gm31135	0.139483	-1.45839	1.45839	0.000615732	0.00169204	0.00111657	0.0024558	0.265833	19133479
Gm9833	1.40393e-18	-1.45615	1.45615	0.0153761	0.0421883	0.0216615	0.0586935	7.07565e-17	1.88081e+07
Pgpep1l	0.29115	-1.45449	1.45449	0.000847456	0.00232253	0.00223314	0.00343811	0.450958	19134662
Clcnkb	0.139256	-1.4436	1.4436	0.000408586	0.00111134	0.00111657	0.0024558	0.265679	19133472
Gm29083	0.0692148	-1.44066	1.44066	0.000733963	0.0019923	0.00133988	0.00319253	0.156675	19128796
Adamts8	0.174178	-1.43923	1.43923	0.000525102	0.00142396	0.0015632	0.00294695	0.312748	19133055
Pramef12	0.000267327	-1.43381	1.43381	0.00328275	0.00886867	0.00424297	0.0110511	0.00146937	1.90837e+07
AI593442	0.000284471	-1.43053	1.43053	0.00195856	0.00527921	0.00334971	0.0095776	0.00155245	1.90889e+07
Gm15852	0.0460954	-1.41182	1.41182	0.000584403	0.00155494	0.000893256	0.00270138	0.113374	19129209
Gm17344	0.0692807	-1.41017	1.41017	0.000879254	0.00233678	0.00133988	0.00319253	0.156803	19128800
Gm49490	0.0385495	-1.40958	1.40958	0.00136349	0.00362225	0.0031264	0.00613949	0.0983223	19118163
Gm3739	0.109425	-1.4059	1.4059	0.000787965	0.00208797	0.00223314	0.00417485	0.221253	19127956
Gna14	0.0271837	-1.40236	1.40236	0.00145522	0.00384662	0.00178651	0.00442043	0.0741988	19121676
Rhd	0.000851405	-1.39293	1.39293	0.00450578	0.0118327	0.00870925	0.0166994	0.00403744	19072478
Treml2	0.18936	-1.39263	1.39263	0.000871208	0.00228742	0.00178651	0.00319253	0.332829	19132862
Gm14698	0.0142152	-1.38209	1.38209	0.00229775	0.00598896	0.00491291	0.00933202	0.0437832	19105280
Hist1h4m	0.0532137	-1.37651	1.37651	0.000680834	0.00176771	0.0015632	0.00368369	0.127259	1.91264e+07
Gdf10	0.00203315	-1.37529	1.37529	0.00267297	0.00693424	0.00379634	0.00908644	0.00850947	1.90974e+07
4930458D05Rik	1.68122e-08	-1.36527	1.36527	0.00847456	0.0218326	0.0102724	0.0265226	2.35094e-07	18997536
Cacna1b	0.00189071	-1.36488	1.36488	0.00234878	0.0060494	0.0031264	0.00810413	0.00799633	19100334
Cib3	0.00108601	-1.36315	1.36315	0.00244579	0.00629171	0.00401965	0.00982318	0.00498387	19092739
Ermap	0.0637893	-1.36202	1.36202	0.00210876	0.00542046	0.00491291	0.00810413	0.146927	19116430
Endou	0.103664	-1.35472	1.35472	0.00170875	0.00437008	0.0031264	0.00540275	0.212678	19124884
Mzb1	0.0670952	-1.35154	1.35154	0.00340029	0.00867702	0.00379634	0.00663065	0.152918	1.91198e+07
C5ar1	0.0613237	-1.33951	1.33951	0.00113793	0.00287971	0.00178651	0.00392927	0.142488	19126143
Gm47708	0.0217758	-1.33879	1.33879	0.00198195	0.00501312	0.00267977	0.00589391	0.061923	19116358
Hist1h4c	4.85609e-34	-1.33772	1.33772	0.0414007	0.104641	0.050469	0.124509	6.52643e-32	18472442
Pla2g2f	0.0246091	-1.3352	1.3352	0.00143675	0.00362505	0.00223314	0.00515717	0.0682381	19119018
Gm31597	0.00237581	-1.33202	1.33202	0.00189158	0.00476215	0.00290308	0.00761297	0.00975795	1.91028e+07
4631405J19Rik	0.279979	-1.33083	1.33083	0.000756283	0.0019024	0.00200983	0.00319253	0.438388	1.91349e+07
Gm47003	3.97484e-06	-1.32539	1.32539	0.00491707	0.0123222	0.00602948	0.0164538	3.50208e-05	1.90507e+07
Pcdhb15	7.89823e-06	-1.32025	1.32025	0.00734097	0.0183311	0.0116123	0.0243124	6.50212e-05	19029493
Bcl6b	0.331798	-1.31932	1.31932	0.00136512	0.00340665	0.00334971	0.00466601	0.493732	1.91336e+07
Bmx	0.0148882	-1.31823	1.31823	0.00190512	0.0047506	0.00267977	0.00613949	0.0454264	19114130
Spata31d1a	0.0211742	-1.31418	1.31418	0.00114283	0.00284179	0.00200983	0.00491159	0.0605272	19119231
Eci3	3.42898e-06	-1.30998	1.30998	0.00415939	0.0103127	0.00535954	0.0154715	3.06419e-05	19053683
Mmp25	0.0348256	-1.30797	1.30797	0.000975605	0.00241554	0.0015632	0.00392927	0.0905337	19124107
Gm14091	4.83535e-06	-1.30513	1.30513	0.00597805	0.0147721	0.00982582	0.0221022	4.15222e-05	19033572
Nptx2	0.00576628	-1.30398	1.30398	0.00216485	0.0053452	0.00245645	0.00638507	0.0206396	19109909
5830416I19Rik	2.08513e-72	-1.29533	1.29533	0.0998858	0.245154	0.0980348	0.246316	9.29201e-70	17807680
Actg2	0.00457201	-1.29137	1.29137	0.006487	0.0158776	0.00625279	0.0120334	0.0169847	19092796
Caln1	2.54255e-05	-1.28963	1.28963	0.00630347	0.0154098	0.00759268	0.0176817	0.000185584	19053690
Cntn4	1.19065e-08	-1.28694	1.28694	0.00620548	0.015142	0.00692273	0.0213654	1.72476e-07	1.90144e+07
Bhlha15	0.380943	-1.28604	1.28604	0.000531993	0.00129731	0.00200983	0.00294695	0.544229	19137126
Cd36	0.000348152	-1.28548	1.28548	0.00467928	0.0114063	0.00580616	0.0132613	0.0018395	19077703
Dclk3	0.00927366	-1.28531	1.28531	0.000902314	0.00219925	0.0015632	0.00466601	0.03063	1.91174e+07
Gm44214	0.280246	-1.28511	1.28511	0.000755245	0.00184053	0.00200983	0.00319253	0.438562	1.91349e+07
Mc1r	1.22203e-49	-1.28165	1.28165	0.0746459	0.181476	0.0792765	0.188114	2.65305e-47	18155375
Gm28386	0.658726	-1.28042	1.28042	0.000695157	0.00168861	0.00178651	0.00221022	0.781358	19141804
Gm50068	0.011541	-1.27916	1.27916	0.00107861	0.00261776	0.00133988	0.00417485	0.0367914	19119858
Gm10406	0.336561	-1.2782	1.2782	0.00107361	0.00260389	0.00357302	0.00491159	0.499312	19133403
Cstdc5	1.19329e-07	-1.27528	1.27528	0.00731863	0.0177144	0.00714605	0.0203831	1.42807e-06	19025271
Klkb1	4.91887e-15	-1.27438	1.27438	0.0209619	0.0507057	0.0209915	0.0527996	1.76849e-13	1.88571e+07
Mpp7	9.28278e-42	-1.2686	1.2686	0.0560158	0.134957	0.0770433	0.172397	1.65468e-39	18266972
Elane	0.0228338	-1.26752	1.26752	0.00113088	0.00272255	0.00111657	0.00343811	0.064284	19124527
Erfe	0.164023	-1.25958	1.25958	0.00109189	0.00261427	0.00245645	0.00417485	0.298952	1.913e+07
Gm38832	0.0271965	-1.2589	1.2589	0.00109258	0.00261469	0.00178651	0.00442043	0.0742218	19121678
Irf4	0.266568	-1.25586	1.25586	0.000766153	0.00182964	0.00178651	0.00294695	0.424174	19135092
Il1r2	0.009074	-1.25216	1.25216	0.00203933	0.00485765	0.00379634	0.00810413	0.0300644	1.91064e+07
Fam220a	3.49707e-07	-1.25123	1.25123	0.0102208	0.0243301	0.0178651	0.0353635	3.87781e-06	1.8985e+07
Nipal1	0.00161882	-1.25058	1.25058	0.00264002	0.00628157	0.00401965	0.0095776	0.00702181	19095038
Hist1h2ad	0.0177457	-1.24839	1.24839	0.00250214	0.0059445	0.00558285	0.0100688	0.0523438	1.91047e+07
Kcnd2	9.18216e-05	-1.24531	1.24531	0.0054401	0.0128968	0.00602948	0.0144892	0.000573732	1.90686e+07
Mpo	0.000809853	-1.24296	1.24296	0.001701	0.00402599	0.00223314	0.00712181	0.0038642	19101128
Capn12	0.0012867	-1.23642	1.23642	0.0037983	0.00894932	0.00558285	0.0120334	0.00578271	1.90868e+07
Slc22a3	0.0449271	-1.23631	1.23631	0.00135702	0.00319709	0.00133988	0.00343811	0.111211	19126562
Gata6	0.157916	-1.23548	1.23548	0.00088501	0.00208384	0.00133988	0.00270138	0.291302	19133269
4933417E11Rik	0.0365708	-1.23451	1.23451	0.000930289	0.00218898	0.00111657	0.00319253	0.0941457	1.91268e+07
Rgs9bp	0.0804757	-1.23066	1.23066	0.0015867	0.00372359	0.00334971	0.00589391	0.176001	19122434
Lpl	7.43518e-17	-1.22928	1.22928	0.0504033	0.11817	0.0404198	0.0832515	3.18566e-15	1.87519e+07
Pik3r6	0.521629	-1.22483	1.22483	0.00104923	0.00245234	0.00267977	0.00343811	0.673164	19138722
9430078K24Rik	0.232971	-1.22446	1.22446	0.000739794	0.00172866	0.00133988	0.0024558	0.386171	19135511
Gm45606	0.0247061	-1.22339	1.22339	0.00175792	0.00410464	0.00223314	0.00515717	0.0684622	19119036
Pla2g4d	0.0146037	-1.22284	1.22284	0.00135496	0.00316255	0.0015632	0.00442043	0.0447114	19119655
Ccdc85a	0.105364	-1.22168	1.22168	0.000600234	0.00139986	0.00133988	0.00294695	0.214936	19131034
Lrg1	0.202369	-1.21925	1.21925	0.00236608	0.00550885	0.00357302	0.00540275	0.349044	19128946
Col13a1	2.50382e-05	-1.21659	1.21659	0.0132706	0.0308406	0.012059	0.0240668	0.00018331	19035729
Slc35d3	0.00353753	-1.21269	1.21269	0.00374559	0.00868115	0.00558285	0.0112967	0.013727	19093430
Slc6a20a	0.0904875	-1.21055	1.21055	0.00113521	0.00262716	0.00178651	0.00368369	0.192236	19128377
Igkc	5.36638e-05	-1.20693	1.20693	0.0196358	0.0453284	0.0176418	0.030943	0.00035735	19023685
Trim5	0.00582302	-1.20523	1.20523	0.00387684	0.00893901	0.00513622	0.0103143	0.0208207	19098398
Runx2os2	0.139418	-1.20514	1.20514	0.000775033	0.00178692	0.00111657	0.0024558	0.265808	19133477
Icam4	0.000693717	-1.20488	1.20488	0.00563185	0.0129825	0.00893256	0.0171906	0.00338835	19070214
Colec11	0.173285	-1.19632	1.19632	0.00193095	0.00442485	0.00267977	0.00442043	0.311541	19129791
Mroh2a	0.0460822	-1.19345	1.19345	0.000824631	0.00188592	0.000893256	0.00270138	0.113358	19129208
Gm32816	0.0450167	-1.19192	1.19192	0.00096241	0.00219868	0.00133988	0.00343811	0.111368	19126570
Tmem30c	0.0103436	-1.19018	1.19018	0.00217655	0.00496647	0.00334971	0.00736739	0.0336153	19109058
Gm47061	0.00360649	-1.18905	1.18905	0.00309105	0.00704767	0.00558285	0.0112967	0.0139445	19093538
Gm17634	0.391255	-1.18419	1.18419	0.000853541	0.00193955	0.00223314	0.00319253	0.554483	19136921
Cwh43	0.336532	-1.18323	1.18323	0.000450742	0.00102356	0.00133988	0.00221022	0.499312	19137748
S100a9	2.02164e-41	-1.17941	1.17941	0.0582446	0.131915	0.0647611	0.156434	3.56609e-39	18316339
Cxcl2	0.00160435	-1.17915	1.17915	0.00474926	0.0107544	0.00602948	0.0125246	0.00696696	1.90865e+07
Gm10855	0.0975876	-1.17693	1.17693	0.00204483	0.00462325	0.00290308	0.00515717	0.203491	1.91251e+07
Egfros	0.00886213	-1.17634	1.17634	0.00273664	0.00618488	0.00535954	0.0103143	0.0295125	19100462
Gm49083	1.78339e-05	-1.17373	1.17373	0.00449922	0.01015	0.00535954	0.0144892	0.000135669	19062633
Gm49201	0.0354426	-1.17364	1.17364	0.00218101	0.00491993	0.00379634	0.00712181	0.0918276	1.91153e+07
D530037P16Rik	0.00436456	-1.17326	1.17326	0.00205581	0.00463627	0.00379634	0.00859528	0.0163084	1.91019e+07
Gypa	0.000166095	-1.17105	1.17105	0.00821757	0.018504	0.00781599	0.0166994	0.000965552	19064577
Tmem178b	2.032e-05	-1.16414	1.16414	0.00509258	0.0114124	0.00915587	0.0201375	0.000152256	19045502
Olfr729	0.0192582	-1.16375	1.16375	0.00222099	0.00497591	0.00245645	0.00564833	0.0559861	1.91166e+07
Pde6a	1.71357e-38	-1.15951	1.15951	0.0649053	0.144987	0.065431	0.153733	2.76358e-36	18350587
Cd7	0.139515	-1.15755	1.15755	0.00106139	0.00236774	0.00111657	0.0024558	0.265844	19133480
Pstpip2	0.00166756	-1.1572	1.1572	0.00273227	0.00609364	0.00468959	0.0105599	0.00719453	1.90922e+07
Fndc11	0.525474	-1.15626	1.15626	0.00118143	0.00263316	0.00290308	0.00368369	0.67622	1.91385e+07
Adgrv1	0.0110958	-1.15591	1.15591	0.00278642	0.00620884	0.00424297	0.00859528	0.0356269	1.9106e+07
Mrgprf	0.000235585	-1.15382	1.15382	0.00472849	0.010521	0.00781599	0.0164538	0.00131325	1.90669e+07
Gm13272	0.13945	-1.15192	1.15192	0.000787939	0.00175087	0.00111657	0.0024558	0.265819	19133478
Gm10371	0.000100902	-1.15067	1.15067	0.00225012	0.00499565	0.00357302	0.0105599	0.000625431	19082135
Gm43305	4.885e-09	-1.14912	1.14912	0.0117513	0.026062	0.0198749	0.0415029	7.56839e-08	1.8948e+07
Adamts14	4.06785e-05	-1.14787	1.14787	0.00701215	0.015538	0.0133988	0.0255403	0.000281163	19034554
Ano7	0.18905	-1.14549	1.14549	0.000921486	0.00203852	0.00178651	0.00319253	0.332705	19132853
Serpina9	0.0288213	-1.14346	1.14346	0.0010678	0.00235889	0.00133988	0.00368369	0.0777413	19124326
4933408N05Rik	0.0692972	-1.14262	1.14262	0.000730799	0.00161347	0.00133988	0.00319253	0.156819	19128801
Klhl31	0.00452078	-1.13841	1.13841	0.00202649	0.00446107	0.00267977	0.00687623	0.0168215	19107435
Clec3b	0.0531758	-1.1336	1.1336	0.00217531	0.00477274	0.00223314	0.00466601	0.127204	19123494
Nyap2	0.000253893	-1.13348	1.13348	0.0051839	0.0113728	0.00468959	0.0117878	0.00140477	19081065
Gm47547	0.00101589	-1.13309	1.13309	0.00328267	0.00719981	0.00580616	0.0125246	0.00471448	19084396
Vwc2	3.34348e-13	-1.13303	1.13303	0.0186655	0.0409369	0.0205449	0.0493615	9.49975e-12	1.88842e+07
Gm29325	1.37523e-05	-1.13029	1.13029	0.00621426	0.0136032	0.00602948	0.0157171	0.000108116	19057601
Gm46123	0.000916646	-1.13029	1.13029	0.00381969	0.00836139	0.00491291	0.0112967	0.00430941	19087553
Gm12089	0.00910046	-1.1246	1.1246	0.0015391	0.00335586	0.00379634	0.00810413	0.0301285	1.91064e+07
Fhl5	0.280602	-1.12443	1.12443	0.00122931	0.00268007	0.00200983	0.00319253	0.438999	1.91349e+07
Cfap57	0.103813	-1.12083	1.12083	0.00187254	0.00407227	0.0031264	0.00540275	0.212847	19124893
Ms4a1	0.134416	-1.12057	1.12057	0.00316455	0.00688079	0.00290308	0.00491159	0.258866	19127363
Pax3	2.84062e-05	-1.1183	1.1183	0.00948752	0.0205965	0.00982582	0.0208743	0.000204259	19044940
Gm10062	8.00229e-60	-1.11711	1.11711	0.129302	0.280471	0.128852	0.270138	2.50946e-57	17856657
Ltf	0.00231806	-1.11433	1.11433	0.00169314	0.00366556	0.0015632	0.00540275	0.0095555	19110722
Gm39121	0.0282407	-1.1139	1.1139	0.00197585	0.00427634	0.00245645	0.00540275	0.0764797	19118830
Kbtbd13	0.15805	-1.11277	1.11277	0.000744408	0.00160986	0.00133988	0.00270138	0.291517	19133273
Apol7b	0.0693797	-1.11258	1.11258	0.000751423	0.00162482	0.00133988	0.00319253	0.156922	19128806
Rapsn	0.00684971	-1.11109	1.11109	0.00449993	0.00972024	0.00647611	0.0120334	0.0238472	1.90949e+07
Slc30a2	0.189291	-1.1108	1.1108	0.00116946	0.00252562	0.00178651	0.00319253	0.332829	19132860
Tmc3	0.00191539	-1.10931	1.10931	0.00292411	0.00630854	0.0031264	0.00810413	0.00808255	19100390
Npas4	0.262536	-1.10927	1.10927	0.0013743	0.00296486	0.00357302	0.00515717	0.420038	19131168
Rnase6	0.52788	-1.10912	1.10912	0.00190287	0.00410476	0.0031264	0.00392927	0.678038	19138319
4732465J04Rik	0.0170671	-1.10849	1.10849	0.0024165	0.00521047	0.00290308	0.00638507	0.050847	19113955
B430218F22Rik	0.214576	-1.10571	1.10571	0.0012438	0.00267672	0.00223314	0.00368369	0.364082	19132458
Chil3	0.00478236	-1.10486	1.10486	0.00156961	0.00337589	0.00223314	0.00613949	0.0176533	19110122
Ffar1	0.0424477	-1.09957	1.09957	0.00228204	0.00489021	0.00334971	0.00638507	0.106317	19118013
Siglecg	0.00371791	-1.09928	1.09928	0.00164681	0.00352824	0.0015632	0.00515717	0.0142635	1.9113e+07
Chrdl1	5.08767e-16	-1.09729	1.09729	0.0330055	0.0706159	0.0332738	0.072446	2.0513e-14	1.87903e+07
Sfrp4	3.52694e-14	-1.09614	1.09614	0.0615246	0.131529	0.0511389	0.0925835	1.14636e-12	18761431
Ccdc92b	0.0165701	-1.09302	1.09302	0.00193394	0.00412548	0.00223314	0.00540275	0.0496194	19116801
Grin1	0.018383	-1.09083	1.09083	0.00305655	0.00651032	0.00468959	0.00884086	0.0539698	19107806
Hist1h3f	1.97046e-08	-1.09017	1.09017	0.0154237	0.0328369	0.0238946	0.0459234	2.72612e-07	1.89437e+07
Stmn4	2.14171e-05	-1.08714	1.08714	0.0106404	0.0226058	0.0151854	0.0284872	0.000159489	19023928
Hist1h3b	0.00629322	-1.0836	1.0836	0.015501	0.0328515	0.0230013	0.0324165	0.0222298	19057487
1700011D18Rik	0.233017	-1.08206	1.08206	0.000836932	0.00177183	0.00133988	0.0024558	0.386172	19135512
Vmn1r90	0.000916646	-1.08179	1.08179	0.00361018	0.00764153	0.00491291	0.0112967	0.00430941	19087553
Acbd7	0.0139555	-1.07904	1.07904	0.00377478	0.00797473	0.00580616	0.0105599	0.0431088	19102261
Cd5	0.847266	-1.07776	1.07776	0.000680923	0.00143726	0.00178651	0.00196464	0.911943	19144045
Gm14004	0.000351481	-1.07667	1.07667	0.0045713	0.00964159	0.00513622	0.012279	0.00185478	19080764
Slc12a1	9.03826e-29	-1.07282	1.07282	0.0609322	0.128173	0.0623046	0.133841	9.44777e-27	18496145
A130077B15Rik	0.00576355	-1.07134	1.07134	0.00212203	0.00445921	0.00245645	0.00638507	0.0206343	19109907
Abca14	0.174553	-1.06917	1.06917	0.00113586	0.00238329	0.0015632	0.00294695	0.313322	19133066
Cnmd	6.12691e-11	-1.06759	1.06759	0.0374865	0.078569	0.0276909	0.0557466	1.2773e-09	18889395
Ccdc96	0.381333	-1.06432	1.06432	0.00100162	0.00209458	0.00200983	0.00294695	0.544339	19137133
Gm34667	0.292026	-1.0636	1.0636	0.00122328	0.00255683	0.00223314	0.00343811	0.451677	19134682
Myl1	0.00302596	-1.06344	1.06344	0.00291606	0.00609429	0.00446628	0.00982318	0.0120092	19096820
Ipcef1	0.222877	-1.06315	1.06315	0.0025204	0.00526635	0.00446628	0.00638507	0.37398	19128084
Agtr2	0.0366403	-1.06258	1.06258	0.00117683	0.002458	0.00111657	0.00319253	0.0942193	1.91268e+07
Slc2a6	0.0905255	-1.06249	1.06249	0.000708265	0.00147924	0.00111657	0.00270138	0.192269	1.91312e+07
Gm48780	0.0669369	-1.06138	1.06138	0.00222152	0.00463616	0.00379634	0.00663065	0.152579	1.91198e+07
Gm26714	0.0772765	-1.06035	1.06035	0.00174855	0.00364647	0.00223314	0.00442043	0.170702	19125760
Scamp4	0.0615229	-1.05819	1.05819	0.00104982	0.00218606	0.00178651	0.00392927	0.142829	19126158
2310043M15Rik	0.131932	-1.05725	1.05725	0.000998868	0.0020786	0.00178651	0.00343811	0.255487	19130620
Pdzd7	0.0912843	-1.05649	1.05649	0.00194972	0.00405516	0.00267977	0.00491159	0.193192	19125330
Rab3b	1.74067e-26	-1.0558	1.0558	0.0666071	0.138467	0.072577	0.143664	1.55961e-24	18495862
Ttc21a	0.507771	-1.05435	1.05435	0.00099737	0.00207131	0.00200983	0.00270138	0.661949	1.91394e+07
Tvp23bos	0.00342342	-1.05275	1.05275	0.00355633	0.00737752	0.00468959	0.0100688	0.0133467	1.90967e+07
Nlrp5	0.354188	-1.05201	1.05201	0.000895483	0.00185671	0.0015632	0.0024558	0.51817	19137540
Trim30d	0.118425	-1.04932	1.04932	0.00164715	0.00340886	0.00245645	0.00442043	0.235266	19127765
Klhl4	0.5071	-1.04896	1.04896	0.000717208	0.00148393	0.00200983	0.00270138	0.661472	1.91394e+07
Rgs9	1.35051e-08	-1.04726	1.04726	0.0215477	0.0445306	0.0265744	0.0498527	1.9306e-07	18932161
Xist	4.7189e-264	-1.04588	1.04588	1.27006	2.62221	0.445511	0.944253	2.66366e-260	15252093
Gm20383	0.0129238	-1.04401	1.04401	0.00221204	0.00456113	0.00379634	0.00785855	0.0404383	19108640
1700026D11Rik	0.174621	-1.04297	1.04297	0.000927715	0.00191152	0.0015632	0.00294695	0.313348	19133068
Armc4	0.00146341	-1.04162	1.04162	0.00278919	0.00574166	0.00446628	0.0103143	0.00644342	19092387
Megf11	0.507301	-1.04126	1.04126	0.00122496	0.00252101	0.00200983	0.00270138	0.661555	1.91394e+07
Gm30382	0.00723412	-1.04118	1.04118	0.00137729	0.00283434	0.00223314	0.00589391	0.0249699	19112315
Padi2	0.214403	-1.04098	1.04098	0.00126093	0.00259453	0.00223314	0.00368369	0.363833	19132453
Gm42851	0.0166264	-1.03881	1.03881	0.00156894	0.00322344	0.00223314	0.00540275	0.0497684	19116816
Gm7879	5.09345e-28	-1.03536	1.03536	0.0384136	0.0787333	0.0477892	0.112967	5.07368e-26	18561173
Gadl1	0.0318382	-1.03281	1.03281	0.00220194	0.00450519	0.00267977	0.00564833	0.0842025	19118630
Gm33301	0.234063	-1.03144	1.03144	0.00175043	0.00357801	0.00267977	0.00417485	0.387375	19132029
Btnl9	0.158117	-1.02906	1.02906	0.00107009	0.00218372	0.00133988	0.00270138	0.291609	19133275
En1	0.294691	-1.02485	1.02485	0.00301168	0.00612801	0.00535954	0.00712181	0.454159	19129450
Gm19531	2.08383e-12	-1.01926	1.01926	0.0249551	0.0505807	0.0364002	0.0702358	5.35472e-11	1.8836e+07
Gm30173	0.0319854	-1.01848	1.01848	0.00187084	0.00378991	0.00200983	0.00466601	0.0844992	1.91215e+07
Gm10260	5.18348e-34	-1.01749	1.01749	0.158248	0.320355	0.152077	0.246562	6.91158e-32	1.81831e+07
Wfdc21	0.0649232	-1.01742	1.01742	0.00224014	0.00453472	0.00267977	0.00515717	0.149052	19123092
Gm37933	0.104246	-1.01724	1.01724	0.00213054	0.00431232	0.0031264	0.00540275	0.213433	19124919
Gm45733	0.00485704	-1.0169	1.0169	0.00256693	0.00519437	0.00334971	0.00785855	0.0178803	19104575
1700012B07Rik	0.189395	-1.01537	1.01537	0.00075861	0.00153347	0.00178651	0.00319253	0.332829	19132863
Ftl1-ps1	1.22869e-87	-1.01121	1.01121	0.231209	0.466027	0.254355	0.443762	7.43095e-85	17228367
Krt80	0.513493	-1.01004	1.01004	0.00113763	0.00229114	0.00223314	0.00294695	0.666832	19139153
Zfp433	3.41565e-10	-1.0099	1.0099	0.0241327	0.0485977	0.0357302	0.0650786	6.29386e-09	18876152
1700108F19Rik	0.0301019	-1.00763	1.00763	0.00285216	0.00573456	0.00424297	0.00785855	0.0806305	19112717
Steap4	0.00167769	-1.00483	1.00483	0.0143011	0.028698	0.0151854	0.024558	0.00722718	1.90596e+07
Gm44686	0.143731	-1.00211	1.00211	0.00116884	0.00234111	0.00200983	0.00368369	0.271645	1.91304e+07
Cdnf	0.0301731	-1.00087	1.00087	0.00211483	0.00423222	0.00334971	0.00663065	0.0807446	1.91158e+07
Gm10322	0.148167	-0.999752	0.999752	0.00219756	0.00439437	0.00334971	0.00540275	0.278281	19126948
Vmn1r12	0.13958	-0.99945	0.99945	0.000968613	0.00193649	0.00111657	0.0024558	0.265847	19133482
Gm50375	0.00112153	-0.99739	0.99739	0.00651923	0.0130149	0.00848593	0.0162083	0.00511775	19075174
1700011L22Rik	0.232971	-0.99639	0.99639	0.00112409	0.00224256	0.00133988	0.0024558	0.386171	19135511
Gdpd2	1.61206e-20	-0.995768	0.995768	0.0523013	0.104296	0.0547119	0.109774	9.54496e-19	18645101
Nox1	0.105507	-0.995054	0.995054	0.00101078	0.00201464	0.00133988	0.00294695	0.215109	19131040
Slamf7	0.514653	-0.994973	0.994973	0.00115457	0.0023011	0.00223314	0.00294695	0.667827	19139171
AC142100.1	0.369074	-0.992668	0.992668	0.000757346	0.00150701	0.00178651	0.00270138	0.53336	19137338
4930590L14Rik	0.000385478	-0.992413	0.992413	0.00425547	0.00846629	0.00468959	0.0115422	0.00201285	1.90834e+07
Gm13056	0.154346	-0.990439	0.990439	0.0016542	0.00328655	0.00357302	0.00564833	0.286653	19126739
Cd3d	0.214403	-0.990144	0.990144	0.00149465	0.00296895	0.00223314	0.00368369	0.363833	19132453
Ttn	0.175031	-0.986949	0.986949	0.00128281	0.00254252	0.0015632	0.00294695	0.313615	19133080
Vmn2r65	0.010414	-0.985986	0.985986	0.00503671	0.00997604	0.00580616	0.0108055	0.0337965	19100111
Elovl7	0.0122527	-0.9854	0.9854	0.0034547	0.00683982	0.00759268	0.0130157	0.0387176	19096057
Gm44646	0.0155646	-0.984	0.984	0.00405117	0.00801298	0.00513622	0.0095776	0.0470578	1.91052e+07
1110013H19Rik	0.0602402	-0.981882	0.981882	0.00315335	0.006228	0.00602948	0.0095776	0.140511	1.91132e+07
Ccl21a	0.0805401	-0.981558	0.981558	0.00111907	0.00220972	0.0015632	0.00343811	0.176119	19128610
St8sia2	4.52428e-06	-0.979598	0.979598	0.0130276	0.0256892	0.0167485	0.0319253	3.91088e-05	19007173
Gm20052	0.266975	-0.975697	0.975697	0.00100143	0.00196939	0.00178651	0.00294695	0.424401	19135101
Ptcra	0.0171517	-0.974953	0.974953	0.0073661	0.0144786	0.00781599	0.0130157	0.0510452	1.90982e+07
Gabrb3	0.00593873	-0.973873	0.973873	0.00402059	0.00789687	0.0080393	0.0142436	0.0211585	19089048
Gm16565	7.4349e-07	-0.973004	0.973004	0.0127019	0.0249329	0.0140688	0.0297151	7.66297e-06	1.90039e+07
Cbln3	0.0132963	-0.972691	0.972691	0.00207151	0.00406533	0.0031264	0.00687623	0.041402	19111514
Fbxo40	0.00117055	-0.969181	0.969181	0.00350061	0.00685324	0.00535954	0.0117878	0.00531282	19087126
Ifnz	0.13971	-0.96657	0.96657	0.00085885	0.00167836	0.00111657	0.0024558	0.266035	19133486
Dppa2	3.07857e-05	-0.964434	0.964434	0.00826094	0.0161196	0.00848593	0.0189096	0.00021969	19050902
Gm44702	0.109966	-0.962417	0.962417	0.00149539	0.00291387	0.00223314	0.00417485	0.222135	19127983
Gm34084	0.0283333	-0.962187	0.962187	0.000979235	0.00190781	0.000893256	0.00294695	0.0766938	19126979
Gm31036	0.499244	-0.962009	0.962009	0.000757116	0.00147488	0.00178651	0.0024558	0.654401	19139574
Vmn2r44	0.174997	-0.958672	0.958672	0.00131654	0.00255873	0.0015632	0.00294695	0.313615	19133079
Hlx	0.202773	-0.956451	0.956451	0.00227188	0.00440866	0.00357302	0.00540275	0.349492	19128961
Pde6h	0.523005	-0.956339	0.956339	0.00104744	0.00203244	0.00267977	0.00343811	0.674272	19138745
Gm15965	0.0413676	-0.955692	0.955692	0.00139713	0.00270975	0.00178651	0.00417485	0.10412	19123943
4930481A15Rik	6.38238e-08	-0.952638	0.952638	0.0189609	0.0366971	0.023448	0.0444499	8.06562e-07	18953673
Rtbdn	0.0412862	-0.951469	0.951469	0.00177079	0.00342442	0.00245645	0.00515717	0.104018	1.91211e+07
Kif27	0.00341868	-0.951169	0.951169	0.00455406	0.008805	0.00714605	0.0135069	0.0133361	19087684
Gm3164	0.157916	-0.951033	0.951033	0.000611791	0.00118275	0.00133988	0.00270138	0.291302	19133269
Plac9b	0.0533739	-0.950952	0.950952	0.00111397	0.00215348	0.0015632	0.00368369	0.127588	1.91264e+07
A730049H05Rik	3.39193e-06	-0.949977	0.949977	0.0099871	0.0192935	0.0158553	0.030943	3.03268e-05	1.90081e+07
Gm30191	0.0149646	-0.946602	0.946602	0.00189864	0.00365929	0.00267977	0.00613949	0.0455773	19114154
Hus1b	0.657294	-0.946539	0.946539	0.00114211	0.00220112	0.00290308	0.00343811	0.781358	19140774
Rem1	0.000259175	-0.946266	0.946266	0.00862399	0.0166174	0.011389	0.0213654	0.0014296	19054798
Aoc3	1.79797e-05	-0.946209	0.946209	0.0156496	0.0301537	0.0154087	0.0289784	0.000136717	19021834
Jakmip3	0.0617067	-0.945711	0.945711	0.00196391	0.00378275	0.00468959	0.00785855	0.143143	19116735
Ccl24	0.0759403	-0.945188	0.945188	0.0025172	0.00484671	0.0031264	0.00564833	0.168343	19122688
Htra4	0.0492851	-0.944576	0.944576	0.00264808	0.00509656	0.00379634	0.00687623	0.119551	19117601
Olfr46	0.233108	-0.944281	0.944281	0.0010838	0.00208548	0.00133988	0.0024558	0.386286	19135514
Hbb-bt	1.83476e-103	-0.944278	0.944278	0.251919	0.48475	0.225324	0.445236	1.47952e-100	1.70868e+07
1700010I14Rik	0.0275104	-0.944063	0.944063	0.00222092	0.00427292	0.0031264	0.00638507	0.0748973	19115992
Sphkap	5.75235e-20	-0.943482	0.943482	0.0552163	0.10619	0.0634212	0.120334	3.31328e-18	18626618
Col6a5	0.000834735	-0.941547	0.941547	0.0157685	0.0302848	0.0154087	0.0255403	0.00396616	19052806
Car7	0.0651965	-0.935628	0.935628	0.00202356	0.0038705	0.00267977	0.00515717	0.149472	19123115
Rec8	8.16779e-05	-0.935559	0.935559	0.0123984	0.0237136	0.0183117	0.0314342	0.000517834	19025288
6430562O15Rik	0.0712344	-0.935196	0.935196	0.00178461	0.00341244	0.00401965	0.00687623	0.159815	19119634
Gm30524	0.00422853	-0.933186	0.933186	0.004791	0.00914836	0.00513622	0.0105599	0.0158934	1.90963e+07
Gm45570	0.0105636	-0.931683	0.931683	0.00445946	0.00850642	0.00692273	0.012279	0.0342098	19096787
Kera	0.0220233	-0.929272	0.929272	0.00368587	0.00701906	0.00424297	0.00810413	0.0624903	1.91105e+07
Gm4425	0.0320829	-0.928554	0.928554	0.0042784	0.00814336	0.00692273	0.0112967	0.0846762	19105710
Gm15902	0.000508528	-0.928463	0.928463	0.00794948	0.0151298	0.0107191	0.0198919	0.00257621	1.9062e+07
Hist1h4h	1.38007e-32	-0.926602	0.926602	0.0825004	0.156816	0.102054	0.193271	1.73112e-30	18314743
Gm44264	0.813186	-0.925594	0.925594	0.00140054	0.00266028	0.00267977	0.00294695	0.891179	19143220
Gm6169	2.79273e-11	-0.925481	0.925481	0.0213178	0.0404893	0.031264	0.0613949	6.16584e-10	18871355
Wdr72	0.406831	-0.925117	0.925117	0.00104869	0.00199129	0.00267977	0.00368369	0.571014	19136500
C1s2	1.30143e-07	-0.924792	0.924792	0.0143275	0.0271994	0.0236713	0.0442043	1.54765e-06	18958257
Fam71f2	0.380943	-0.924689	0.924689	0.00126078	0.00239331	0.00200983	0.00294695	0.544229	19137126
Kcnc1	0.499174	-0.923756	0.923756	0.00101682	0.00192895	0.00178651	0.0024558	0.654359	19139573
Add2	0.0189177	-0.922783	0.922783	0.00299739	0.00568236	0.00580616	0.0103143	0.0552237	1.91045e+07
5730507C01Rik	2.81863e-07	-0.922404	0.922404	0.0144503	0.0273873	0.0200983	0.0388016	3.17358e-06	18975514
Odf3l1	0.0193664	-0.922324	0.922324	0.00193978	0.00367621	0.00245645	0.00564833	0.0562137	1.91166e+07
Unc80	3.03337e-09	-0.922267	0.922267	0.0197558	0.0374391	0.0194283	0.0415029	4.85512e-08	18946132
BC028471	0.00595521	-0.920581	0.920581	0.00272712	0.00516211	0.00513622	0.0103143	0.0212128	19098524
Gm2670	0.310812	-0.918521	0.918521	0.00129686	0.00245129	0.00267977	0.00392927	0.471959	19134256
Serpinb1a	0.311871	-0.918321	0.918321	0.00187912	0.00355138	0.00267977	0.00392927	0.473016	19134281
Zfp804a	0.158352	-0.918041	0.918041	0.00119118	0.0022508	0.00133988	0.00270138	0.291883	19133282
Mmp9	5.25875e-14	-0.917036	0.917036	0.0598193	0.112953	0.0596248	0.103635	1.66452e-12	18740793
D030046N08Rik	2.39921e-05	-0.914169	0.914169	0.00639531	0.0120519	0.0109424	0.0225933	0.000176491	19039472
B4galnt3	0.00912655	-0.913774	0.913774	0.00487368	0.00918186	0.00870925	0.0147348	0.0301854	19090617
Gm36283	0.0213407	-0.913673	0.913673	0.00169216	0.00318775	0.00200983	0.00491159	0.0608901	19119265
Cd33	0.111397	-0.913013	0.913013	0.00357579	0.00673311	0.00491291	0.00761297	0.224383	19121019
Aspn	5.39237e-08	-0.909361	0.909361	0.0393036	0.0738206	0.030594	0.0540275	6.923e-07	18930869
Gm21817	0.202728	-0.909294	0.909294	0.00115059	0.00216095	0.00200983	0.00343811	0.349486	19132662
Fibin	6.97781e-11	-0.908596	0.908596	0.0509876	0.0957148	0.0564984	0.0928291	1.43575e-09	1.88087e+07
Hist1h2ab	0.000838953	-0.908399	0.908399	0.016995	0.0318989	0.0250112	0.0373281	0.00398285	19031611
Gm6288	0.0157949	-0.908008	0.908008	0.00303535	0.00569569	0.00424297	0.00834971	0.0476352	19108286
Mmp8	0.0534444	-0.907647	0.907647	0.00158881	0.00298058	0.00223314	0.00466601	0.127703	19123519
Spp1	3.27731e-27	-0.907023	0.907023	0.1128	0.21152	0.0658776	0.137033	3.13548e-25	18505221
Gm5532	0.0631479	-0.903171	0.903171	0.00214001	0.00400219	0.00357302	0.00638507	0.145866	19120039
Pax5	0.3031	-0.901793	0.901793	0.00187939	0.00351143	0.00245645	0.00368369	0.463266	1.91345e+07
Kcnd3	0.0177572	-0.901437	0.901437	0.00579878	0.0108317	0.00669942	0.0115422	0.0523686	19101471
1300017J02Rik	0.0713756	-0.897268	0.897268	0.00287472	0.00535428	0.00401965	0.00687623	0.160047	19119647
Tec	9.38587e-09	-0.897095	0.897095	0.0268902	0.050078	0.042653	0.0709725	1.38991e-07	1.88846e+07
Gm10373	0.499455	-0.895398	0.895398	0.00127855	0.00237827	0.00178651	0.0024558	0.65456	19139577
2010308F09Rik	0.659055	-0.895323	0.895323	0.000878329	0.00163371	0.00178651	0.00221022	0.781358	19141808
Slc6a13	0.121453	-0.892181	0.892181	0.00298312	0.00553661	0.00558285	0.00834971	0.239763	19120376
Ebf2	0.0560784	-0.8905	0.8905	0.00849826	0.0157542	0.00937919	0.0137525	0.132853	19105538
Fer1l5	0.00718695	-0.890169	0.890169	0.00300394	0.00556749	0.00334971	0.00761297	0.0248278	1.91069e+07
Syndig1	0.000309128	-0.889811	0.889811	0.00943428	0.0174811	0.0109424	0.0206287	0.00166289	19057545
Gm9008	0.00470496	-0.888334	0.888334	0.00444483	0.00822755	0.00625279	0.0120334	0.017396	19092967
A730081D07Rik	0.18244	-0.885852	0.885852	0.00188335	0.00348016	0.00290308	0.00466601	0.324249	1.91296e+07
Cpne7	0.302841	-0.885571	0.885571	0.00128755	0.00237874	0.00245645	0.00368369	0.462968	1.91345e+07
Gm36208	0.024821	-0.883168	0.883168	0.00212106	0.00391213	0.00290308	0.00613949	0.0687246	1.91162e+07
Galnt9	0.0674022	-0.883109	0.883109	0.00279482	0.00515461	0.00379634	0.00663065	0.153482	1.91199e+07
P2rx5	0.984338	-0.883051	0.883051	0.000897144	0.00165458	0.00223314	0.00221022	0.991304	19145872
Uchl4	0.0501315	-0.881999	0.881999	0.00414094	0.00763146	0.00647611	0.0103143	0.121206	19110592
Tes3-ps	0.0100225	-0.878275	0.878275	0.00494231	0.00908483	0.00781599	0.0135069	0.0327395	1.90938e+07
1600010M07Rik	0.838792	-0.874306	0.874306	0.000648988	0.00118968	0.00200983	0.00221022	0.907263	1.91438e+07
Gm48882	0.0827819	-0.874242	0.874242	0.00398646	0.00730735	0.00647611	0.00982318	0.179854	19115044
Gm4544	0.000582912	-0.871212	0.871212	0.00802247	0.0146747	0.0100491	0.0189096	0.00290133	19065150
Slc30a3	0.656868	-0.870871	0.870871	0.000756579	0.00138361	0.0015632	0.00196464	0.781358	19142018
Ccdc180	3.51592e-05	-0.869911	0.869911	0.0152978	0.0279575	0.0189817	0.0331532	0.000246843	1.90163e+07
Tnfrsf11a	2.92378e-05	-0.869873	0.869873	0.00733821	0.0134106	0.0122823	0.0243124	0.000209882	1.90359e+07
Agt	0.00618073	-0.869724	0.869724	0.00784782	0.0143404	0.00937919	0.0159627	0.0219101	19085592
Gm46224	0.0237429	-0.869544	0.869544	0.0037488	0.00684938	0.00446628	0.00834971	0.0663359	19110320
Gm28154	0.0016672	-0.869393	0.869393	0.00700198	0.0127919	0.00870925	0.0162083	0.00719453	19077324
Gm11946	0.164346	-0.868526	0.868526	0.00143844	0.0026263	0.00245645	0.00417485	0.299347	1.913e+07
Pcdh12	0.319119	-0.868041	0.868041	0.0016509	0.00301319	0.00290308	0.00417485	0.480838	1.91341e+07
Itgb3	6.28978e-05	-0.867967	0.867967	0.0147309	0.0268852	0.0207682	0.0348723	0.00041124	19016501
4930445N18Rik	0.00542201	-0.867954	0.867954	0.00265609	0.00484756	0.00290308	0.00712181	0.0196063	1.91073e+07
Gm5129	0.0365815	-0.867449	0.867449	0.00137507	0.00250872	0.00223314	0.00491159	0.0941517	19121284
Pdf	0.372097	-0.866433	0.866433	0.00247665	0.0045153	0.00692273	0.00859528	0.535681	1.91303e+07
H1foo	0.1751	-0.866236	0.866236	0.00141285	0.00257548	0.0015632	0.00294695	0.313672	19133082
Zar1	0.00124717	-0.866066	0.866066	0.00504454	0.00919462	0.00870925	0.0164538	0.00562288	1.90752e+07
Ank1	0.0935219	-0.865863	0.865863	0.00411918	0.00750691	0.00759268	0.0110511	0.196631	19114007
Hist1h2bj	0.000508656	-0.864882	0.864882	0.017324	0.0315503	0.0292541	0.0429764	0.00257621	19018167
Trib3	0.022717	-0.863867	0.863867	0.00432368	0.00786871	0.00535954	0.0095776	0.0640509	19107221
Gm36101	1.06295e-20	-0.862955	0.862955	0.0624643	0.113607	0.0614113	0.120334	6.4516e-19	1.86192e+07
Gm16244	0.100648	-0.858735	0.858735	0.0013041	0.00236491	0.00200983	0.00392927	0.208036	19128187
1700001C19Rik	0.00767491	-0.856258	0.856258	0.00494095	0.00894478	0.00580616	0.0110511	0.0262083	19097921
Cdkl1	1.79975e-11	-0.855511	0.855511	0.0380094	0.0687742	0.049799	0.0861984	4.06359e-10	1.88133e+07
Trim10	0.0706262	-0.855299	0.855299	0.00232976	0.00421484	0.00290308	0.00540275	0.15885	19122898
Trim63	0.0489037	-0.852257	0.852257	0.00318006	0.00574104	0.00491291	0.00834971	0.118848	19114323
Slc5a7	0.110564	-0.852122	0.852122	0.00291524	0.00526245	0.00334971	0.00564833	0.223051	1.91247e+07
Msc	0.00603625	-0.849833	0.849833	0.00360012	0.00648847	0.00513622	0.0103143	0.0214563	19098600
Arl11	0.0413529	-0.849477	0.849477	0.00278972	0.00502665	0.00424297	0.00761297	0.104099	1.9115e+07
Slco1a4	0.660725	-0.848781	0.848781	0.00122318	0.00220292	0.00200983	0.0024558	0.781358	19141608
Serpinb1b	0.202763	-0.846762	0.846762	0.00138153	0.00248462	0.00200983	0.00343811	0.349492	19132663
Isoc2a	3.43574e-19	-0.845743	0.845743	0.0621192	0.11164	0.0819562	0.142436	1.80686e-17	18589621
A830019L24Rik	0.234371	-0.84458	0.84458	0.00210951	0.00378813	0.00267977	0.00417485	0.387772	19132038
Pmch	4.96555e-22	-0.844516	0.844516	0.0925014	0.166101	0.0922287	0.160855	3.35006e-20	18513975
Gm49207	1.52984e-14	-0.843305	0.843305	0.0406963	0.0730155	0.0527021	0.0962672	5.20207e-13	1.87495e+07
Cdh4	0.189788	-0.842703	0.842703	0.00221346	0.00396963	0.0031264	0.00491159	0.333078	19129396
4930562F07Rik	0.00106878	-0.842689	0.842689	0.00746658	0.0133905	0.00915587	0.0171906	0.00491758	1.90726e+07
1700028K03Rik	0.00719498	-0.842392	0.842392	0.00314969	0.00564747	0.00401965	0.00859528	0.02485	19104039
Gm20628	0.202728	-0.841344	0.841344	0.00117178	0.0020995	0.00200983	0.00343811	0.349486	19132662
Six2	0.00790069	-0.841069	0.841069	0.00327689	0.00587014	0.00424297	0.00884086	0.0268655	19103761
Robo4	0.423014	-0.840067	0.840067	0.00181587	0.00325065	0.00334971	0.00442043	0.586484	19135880
Fer1l6	0.0303611	-0.839709	0.839709	0.00246105	0.00440452	0.00334971	0.00663065	0.0811624	1.91158e+07
Lgi3	0.00741583	-0.836465	0.836465	0.00853451	0.0152398	0.0118356	0.0189096	0.025463	1.9081e+07
Agap2	0.381555	-0.834088	0.834088	0.00132751	0.00236659	0.00200983	0.00294695	0.544519	19137137
Exd1	0.0112248	-0.833551	0.833551	0.00445823	0.00794486	0.00714605	0.0125246	0.0359594	19096603
Gm37986	0.174805	-0.833499	0.833499	0.00194511	0.0034662	0.00446628	0.00663065	0.313454	19125880
Rab6b	2.12355e-08	-0.832074	0.832074	0.0266282	0.0474046	0.034167	0.0596758	2.91885e-07	1.89132e+07
Gm3667	0.532187	-0.829105	0.829105	0.00150137	0.00266731	0.00379634	0.00466601	0.680514	1.91377e+07
Fam81a	5.59353e-05	-0.828772	0.828772	0.0162829	0.0289212	0.026351	0.0419941	0.000370292	19001894
Atp6ap1l	0.000571686	-0.828005	0.828005	0.00659535	0.0117082	0.00736936	0.0152259	0.00285321	19074397
Gm9774	3.48794e-10	-0.827899	0.827899	0.0376358	0.0668073	0.0515855	0.0854617	6.42008e-09	18834123
Hyal4	0.337201	-0.827807	0.827807	0.000559734	0.00099352	0.00133988	0.00221022	0.500102	19137759
8030423F21Rik	0.499595	-0.82767	0.82767	0.000926478	0.00164433	0.00178651	0.0024558	0.65456	19139579
Gm4737	0.0115702	-0.827402	0.827402	0.00950874	0.0168731	0.0158553	0.0233301	0.0368635	1.90769e+07
Zfp54	0.000161123	-0.826961	0.826961	0.0124081	0.0220113	0.0187584	0.0314342	0.000939876	19029832
Spaar	0.407291	-0.826688	0.826688	0.00171232	0.00303699	0.00267977	0.00368369	0.571422	19136509
Ctxn2	1.57719e-08	-0.826575	0.826575	0.0289708	0.0513788	0.031264	0.0562377	2.22013e-07	1.89188e+07
Ighd	0.336775	-0.826272	0.826272	0.00129481	0.00229583	0.00133988	0.00221022	0.499514	19137752
Gm48662	0.00602366	-0.825961	0.825961	0.00583328	0.0103407	0.0104958	0.0174361	0.0214206	1.90824e+07
Hist2h2ab	0.000578383	-0.825767	0.825767	0.00568672	0.0100796	0.00915587	0.0176817	0.00288323	19068089
Penk	1.26791e-43	-0.824835	0.824835	0.184424	0.326676	0.175525	0.303782	2.43987e-41	17969398
Gm49915	0.233292	-0.824471	0.824471	0.000865142	0.00153207	0.00133988	0.0024558	0.386518	19135518
A630023P12Rik	0.139742	-0.822789	0.822789	0.000488307	0.000863729	0.00111657	0.0024558	0.266067	19133487
Gm45081	0.0806111	-0.822689	0.822689	0.00122937	0.00217439	0.0015632	0.00343811	0.176206	19128614
Ly6k	0.488992	-0.822167	0.822167	0.00122582	0.00216733	0.0015632	0.00221022	0.645601	1.91398e+07
6430550D23Rik	0.0220149	-0.820879	0.820879	0.0019348	0.00341779	0.00267977	0.00589391	0.0624876	19116411
Ccdc169	0.267472	-0.820523	0.820523	0.00130383	0.00230263	0.00178651	0.00294695	0.424615	19135112
Gm2366	0.0218164	-0.820503	0.820503	0.00320783	0.00566509	0.00424297	0.00810413	0.0620281	1.91105e+07
Ccm2l	0.195879	-0.819982	0.819982	0.00165563	0.00292282	0.00334971	0.00515717	0.340556	1.91292e+07
Arl4aos	0.158284	-0.819706	0.819706	0.000710286	0.00125369	0.00133988	0.00270138	0.291791	19133280
Dgkeos	0.0712669	-0.819255	0.819255	0.00214144	0.00377855	0.00401965	0.00687623	0.159867	19119637
A430108G06Rik	0.0214441	-0.818705	0.818705	0.00184397	0.00325243	0.00200983	0.00491159	0.0611131	19119286
BC028777	0.174929	-0.818375	0.818375	0.0013001	0.00229263	0.0015632	0.00294695	0.313598	19133077
Gper1	0.0371311	-0.817554	0.817554	0.00437985	0.00771912	0.00781599	0.012279	0.0952838	19104861
Gm43714	0.0112941	-0.817388	0.817388	0.00277312	0.00488682	0.00424297	0.00859528	0.0361608	1.91061e+07
Gm37748	0.134331	-0.817043	0.817043	0.00206146	0.00363187	0.00290308	0.00491159	0.25879	19127359
Setdb2	1.08105e-11	-0.81604	0.81604	0.040906	0.0720178	0.0573917	0.0962672	2.51119e-10	18789992
Gm20667	0.0751204	-0.815749	0.815749	0.00176788	0.00311185	0.00424297	0.00712181	0.166831	1.91194e+07
Gm17705	0.121383	-0.815462	0.815462	0.00265699	0.00467594	0.00379634	0.00613949	0.239736	1.91243e+07
Gm43847	0.174963	-0.815174	0.815174	0.00144677	0.00254561	0.0015632	0.00294695	0.313608	19133078
Rnaset2b	2.13085e-86	-0.814901	0.814901	0.306043	0.538385	0.327378	0.534381	1.20279e-83	17123543
Hba-a2	1.29274e-116	-0.814409	0.814409	0.368819	0.648598	0.30661	0.564096	1.45942e-113	1.67848e+07
Gm27017	0.0503467	-0.813918	0.813918	0.00207639	0.00365025	0.00290308	0.00564833	0.121605	1.91207e+07
Slx1b	2.76492e-29	-0.813714	0.813714	0.126418	0.222208	0.140688	0.235756	2.98223e-27	1.82766e+07
Ccdc171	9.67348e-12	-0.811341	0.811341	0.0429563	0.0753814	0.0538187	0.0920923	2.25635e-10	1.87976e+07
Oxtr	0.0087928	-0.811329	0.811329	0.00517041	0.00907318	0.00625279	0.0115422	0.0293452	19097453
Tcerg1l	0.643809	-0.810828	0.810828	0.00199836	0.00350555	0.00424297	0.00491159	0.772881	19139537
Pik3c2g	8.25611e-15	-0.810154	0.810154	0.0519064	0.0910127	0.0549352	0.100196	2.88266e-13	18737866
Apoc1	0.356971	-0.810058	0.810058	0.0033679	0.00590487	0.00468959	0.00613949	0.520847	1.91324e+07
Mchr1	0.11192	-0.809736	0.809736	0.00405429	0.00710673	0.00491291	0.00761297	0.225142	19121055
Gm17191	0.251321	-0.80866	0.80866	0.0011755	0.00205898	0.0015632	0.00270138	0.407105	1.91353e+07
Ptprb	0.0694472	-0.808437	0.808437	0.00847463	0.0148417	0.0122823	0.016945	0.156986	1.91028e+07
A830052D11Rik	0.00101107	-0.807728	0.807728	0.00668804	0.0117071	0.0080393	0.0157171	0.00469727	19075905
Inmt	0.000697452	-0.807521	0.807521	0.0137929	0.0241404	0.0107191	0.0196464	0.00340365	19064394
Gm45311	0.0707003	-0.805642	0.805642	0.00163423	0.0028565	0.00290308	0.00540275	0.158929	19122904
4930517E14Rik	0.00171394	-0.805518	0.805518	0.00657209	0.0114865	0.00781599	0.0149804	0.00735616	1.90805e+07
Hist1h2ag	3.10465e-05	-0.80517	0.80517	0.0187243	0.032718	0.0310406	0.0483792	0.000221272	1.89858e+07
Ptgir	0.830023	-0.804906	0.804906	0.00107147	0.00187188	0.00223314	0.0024558	0.902273	19143641
Aldh1b1	0.0241665	-0.80413	0.80413	0.00320938	0.00560387	0.00558285	0.00982318	0.0672753	19107026
Spata5l1	0.0219253	-0.803257	0.803257	0.00295903	0.00516362	0.00424297	0.00810413	0.0622958	1.91105e+07
Nutf2	6.65542e-07	-0.803241	0.803241	0.0222348	0.0388	0.0337204	0.0557466	6.91005e-06	18943864
Cntn3	5.216e-09	-0.803034	0.803034	0.0272761	0.0475904	0.0301474	0.0557466	8.0225e-08	1.89134e+07
Gm7967	0.00999812	-0.802084	0.802084	0.00605305	0.0105542	0.00781599	0.0135069	0.0326724	1.90938e+07
Gm43936	0.660335	-0.801956	0.801956	0.00124357	0.00216812	0.00200983	0.0024558	0.781358	19141603
Tlr5	0.000927952	-0.800307	0.800307	0.00654441	0.0113969	0.0107191	0.0194008	0.00435289	19066596
D830030K20Rik	0.0061933	-0.800033	0.800033	0.00586994	0.0102204	0.0107191	0.0176817	0.0219455	19082110
Atp8b1	6.42712e-06	-0.79975	0.79975	0.0221953	0.0386376	0.0334971	0.0530452	5.372e-05	18965315
Slc44a5	0.00048675	-0.799054	0.799054	0.00638427	0.0111084	0.0096025	0.0184185	0.00248048	1.90653e+07
Xrra1	0.0907484	-0.79702	0.79702	0.0011253	0.00195523	0.00178651	0.00368369	0.19251	19128391
Gnaz	1.9195e-11	-0.796184	0.796184	0.0476368	0.0827213	0.0594015	0.0982318	4.32245e-10	18790141
D030025P21Rik	0.283275	-0.795982	0.795982	0.00214643	0.00372676	0.00446628	0.00613949	0.442078	19130360
Kif6	0.00253341	-0.795083	0.795083	0.00641633	0.0111335	0.0102724	0.0179273	0.0103102	19075850
Gm13166	8.24778e-14	-0.794777	0.794777	0.052666	0.0913656	0.0656543	0.111493	2.52108e-12	18728604
A430010J10Rik	0.0859809	-0.794558	0.794558	0.00393262	0.00682132	0.00491291	0.00785855	0.185148	19118833
Scn3a	0.0244168	-0.794537	0.794537	0.00434319	0.00753336	0.00558285	0.00982318	0.0678271	19107094
Pcdhgb6	0.000160699	-0.79368	0.79368	0.00903632	0.0156644	0.0116123	0.0221022	0.000938695	19050461
Ch25h	0.319868	-0.793515	0.793515	0.00147854	0.00256275	0.00290308	0.00417485	0.481243	1.91341e+07
Ramp1	2.80944e-10	-0.791852	0.791852	0.0501673	0.0868544	0.0605181	0.0967583	5.24532e-09	1.88117e+07
Sytl5	0.660939	-0.790901	0.790901	0.00139522	0.00241395	0.00223314	0.00270138	0.781358	19141402
Tmigd1	0.164696	-0.788682	0.788682	0.00185623	0.00320663	0.00245645	0.00417485	0.299759	1.913e+07
Gm21887	0.000218543	-0.787391	0.787391	0.0134968	0.0232948	0.0241179	0.0378193	0.00123161	1.90199e+07
Trh	0.173799	-0.786566	0.786566	0.00157252	0.00271254	0.00267977	0.00442043	0.3123	19129810
Gm11769	0.00947361	-0.785902	0.785902	0.0067184	0.0115837	0.0102724	0.0166994	0.0312113	19086934
8430432A02Rik	0.139942	-0.785401	0.785401	0.0031088	0.00535824	0.00468959	0.00712181	0.266298	1.91235e+07
Poln	0.196854	-0.784121	0.784121	0.00215559	0.00371202	0.00334971	0.00515717	0.341761	1.91292e+07
Gm42303	0.0536719	-0.783816	0.783816	0.00384852	0.00662592	0.00692273	0.0108055	0.12812	19110166
Tepp	0.0031782	-0.782492	0.782492	0.0048746	0.00838479	0.00692273	0.0132613	0.0125191	19087905
Gm50321	0.00191242	-0.782205	0.782205	0.00622452	0.0107047	0.0102724	0.0181729	0.00807402	19073606
4933406P04Rik	0.00163888	-0.782089	0.782089	0.00929985	0.0159922	0.0131755	0.0221022	0.00709792	19064331
Tspo2	0.027594	-0.781361	0.781361	0.00274498	0.00471795	0.0031264	0.00638507	0.0750646	19116008
Iglc1	0.214767	-0.780601	0.780601	0.00533713	0.00916837	0.00401965	0.00589391	0.364298	19128564
Igf2bp2	1.13467e-21	-0.780462	0.780462	0.0869777	0.1494	0.101831	0.173625	7.50568e-20	18496069
Bfsp2	0.964676	-0.78039	0.78039	0.000920907	0.00158175	0.00200983	0.00196464	0.981366	19146079
Usp50	5.83821e-40	-0.778649	0.778649	0.166468	0.28558	0.203662	0.327603	1.00882e-37	17978279
Asprv1	0.0812336	-0.778393	0.778393	0.00242072	0.00415206	0.00334971	0.00589391	0.177384	19122492
Pou3f3	0.242465	-0.77615	0.77615	0.00204257	0.00349801	0.00290308	0.00442043	0.397054	19131818
Htr2a	0.660652	-0.776126	0.776126	0.00150725	0.0025812	0.00245645	0.00294695	0.781358	19141199
Abhd3	6.75782e-17	-0.775603	0.775603	0.0711991	0.121886	0.0777133	0.13335	2.91878e-15	1.86409e+07
Gm10801	0.0653634	-0.775517	0.775517	0.00275556	0.00471698	0.00267977	0.00515717	0.149819	19123129
S100a8	1.91036e-23	-0.772114	0.772114	0.0618854	0.105686	0.0652077	0.130403	1.48395e-21	1.85637e+07
Cd3e	0.13958	-0.771293	0.771293	0.00119459	0.00203893	0.00111657	0.0024558	0.265847	19133482
Hist1h2ae	1.57719e-18	-0.771258	0.771258	0.0922889	0.157515	0.0792765	0.138752	7.90181e-17	1.86071e+07
Tsix	1.11511e-49	-0.770376	0.770376	0.127301	0.217139	0.128182	0.264244	2.45236e-47	1.79823e+07
Trim12a	9.24248e-14	-0.769852	0.769852	0.0483644	0.0824659	0.0564984	0.0999509	2.79486e-12	1.87526e+07
9430091E24Rik	0.0213771	-0.769766	0.769766	0.00445138	0.00758957	0.00625279	0.0108055	0.0609734	19104170
1700093K21Rik	0.381555	-0.769219	0.769219	0.000913735	0.00155732	0.00200983	0.00294695	0.544519	19137137
Lrrc9	0.0347292	-0.769139	0.769139	0.00383179	0.00653034	0.00468959	0.00834971	0.0903386	19112360
Taf9	0.00552746	-0.769047	0.769047	0.00670981	0.0114345	0.0100491	0.016945	0.0199416	1.90829e+07
Pla2g2d	0.661607	-0.767747	0.767747	0.00106483	0.001813	0.00223314	0.00270138	0.781358	19141411
Erg	7.44832e-10	-0.765526	0.765526	0.030589	0.0520011	0.0314873	0.0594303	1.29199e-08	18894177
Hist1h4a	0.000118031	-0.764591	0.764591	0.0198095	0.0336541	0.0310406	0.0469057	0.000717424	18999220
Mettl21c	0.242941	-0.764527	0.764527	0.00198846	0.00337801	0.00290308	0.00442043	0.397599	19131832
K230015D01Rik	0.000190713	-0.763946	0.763946	0.0143726	0.0244066	0.022778	0.0363458	0.00109217	19021564
Ripor3	0.00127642	-0.763846	0.763846	0.019059	0.0323625	0.0238946	0.035609	0.00574491	1.90381e+07
Depp1	0.488992	-0.763415	0.763415	0.00124663	0.00211616	0.0015632	0.00221022	0.645601	1.91398e+07
Gm26850	0.0983552	-0.762375	0.762375	0.00221688	0.00376046	0.00290308	0.00515717	0.204474	1.91252e+07
Cdrt4	0.0319854	-0.762308	0.762308	0.00191279	0.00324448	0.00200983	0.00466601	0.0844992	1.91215e+07
Adamts6	2.34071e-21	-0.762189	0.762189	0.0893833	0.1516	0.101385	0.171906	1.51868e-19	1.85033e+07
Jazf1	6.75375e-08	-0.762173	0.762173	0.0250105	0.0424188	0.034837	0.0594303	8.47799e-07	18921095
Tbc1d22bos	0.13971	-0.761879	0.761879	0.00107271	0.00181899	0.00111657	0.0024558	0.266035	19133486
Nat8f3	0.302797	-0.761371	0.761371	0.00139428	0.00236344	0.00245645	0.00368369	0.462944	1.91345e+07
C430049B03Rik	3.51794e-36	-0.759114	0.759114	0.163312	0.276398	0.181331	0.295678	5.04854e-34	1.80804e+07
Shc2	3.3354e-05	-0.758905	0.758905	0.0149509	0.0253	0.0236713	0.0392927	0.00023557	19003435
Gfod1	2.78901e-05	-0.758643	0.758643	0.0110331	0.0186669	0.0167485	0.0304519	0.000201232	1.90209e+07
Olfr905	0.0392819	-0.758285	0.758285	0.00277875	0.0047002	0.0031264	0.00613949	0.0998649	19118266
Gm7102	0.214403	-0.758007	0.758007	0.00129517	0.00219033	0.00223314	0.00368369	0.363833	19132453
Gm26739	0.31991	-0.757688	0.757688	0.00168127	0.00284265	0.00290308	0.00417485	0.481243	1.91341e+07
Gm26619	0.0117385	-0.756918	0.756918	0.00225338	0.00380794	0.00290308	0.00663065	0.0373505	1.91117e+07
Wfdc6a	0.000611997	-0.75683	0.75683	0.0115173	0.0194616	0.0160786	0.0267682	0.00302996	19048305
Gm26877	0.984081	-0.756672	0.756672	0.000856266	0.00144674	0.00223314	0.00221022	0.99113	19145875
Abcb4	0.0356834	-0.756195	0.756195	0.00215251	0.00363566	0.00290308	0.00589391	0.0922961	19118466
Gm37170	0.09793	-0.755464	0.755464	0.0018129	0.00306049	0.00290308	0.00515717	0.203954	1.91251e+07
Synpo2l	0.214784	-0.75255	0.75255	0.00147808	0.00249022	0.00223314	0.00368369	0.364298	19132464
A230083G16Rik	0.144256	-0.752301	0.752301	0.00174694	0.00294267	0.00200983	0.00368369	0.272455	1.91304e+07
Gm34643	0.22091	-0.751869	0.751869	0.00321702	0.00541738	0.00424297	0.00613949	0.371594	1.91284e+07
Apobr	0.116218	-0.750889	0.750889	0.00667188	0.0112276	0.0111657	0.0149804	0.232024	19110580
Il4i1	0.23492	-0.750813	0.750813	0.00177515	0.00298712	0.00267977	0.00417485	0.388376	19132054
D430018E03Rik	0.224643	-0.750114	0.750114	0.00282137	0.00474533	0.00446628	0.00638507	0.376117	19128151
Gpr37l1	0.863788	-0.749912	0.749912	0.00267826	0.004504	0.00290308	0.00270138	0.921588	1.91475e+07
Nlrc4	0.658722	-0.749491	0.749491	0.00117422	0.00197409	0.00267977	0.00319253	0.781358	19140980
Necab3	0.347707	-0.748413	0.748413	0.00178156	0.00299292	0.00401965	0.00540275	0.511005	19133037
Ggt1	0.765451	-0.74749	0.74749	0.0021183	0.00355634	0.00424297	0.00466601	0.85958	1.91418e+07
Ccdc154	0.090749	-0.74586	0.74586	0.0012208	0.00204725	0.00111657	0.00270138	0.19251	1.91313e+07
Gm17028	0.148362	-0.745672	0.745672	0.00238811	0.00400427	0.00334971	0.00540275	0.27847	19126957
Gm29054	0.00641262	-0.744268	0.744268	0.00630709	0.0105652	0.00826262	0.0144892	0.0225574	1.9089e+07
Btla	0.107907	-0.74374	0.74374	0.00261869	0.00438502	0.00468959	0.00736739	0.218968	19121247
Nat1	0.128626	-0.742991	0.742991	0.00453624	0.00759204	0.00602948	0.00884086	0.250506	1.912e+07
Gm29292	0.08483	-0.742591	0.742591	0.00196788	0.00329261	0.00245645	0.00466601	0.183229	1.91256e+07
Gm26912	0.0320284	-0.742528	0.742528	0.00231504	0.0038733	0.00267977	0.00564833	0.0845866	19118660
Gm49708	6.16437e-46	-0.742059	0.742059	0.215084	0.359741	0.228897	0.367878	1.25768e-43	17838418
Gm37240	0.354779	-0.741654	0.741654	0.000761863	0.00127391	0.0015632	0.0024558	0.518811	19137550
Lmod1	0.0452486	-0.741211	0.741211	0.00875657	0.0146373	0.0118356	0.016945	0.111778	1.90988e+07
Prr15	0.42742	-0.740832	0.740832	0.00160426	0.00268094	0.00357302	0.00466601	0.590369	19135684
Pdzrn4	6.4337e-05	-0.739481	0.739481	0.061443	0.102584	0.0457794	0.0650786	0.000419677	1.89658e+07
Gm5602	0.24352	-0.738291	0.738291	0.00199425	0.00332681	0.00290308	0.00442043	0.398046	19131849
Eya1	0.00124164	-0.737474	0.737474	0.00900879	0.01502	0.0107191	0.0191552	0.00560092	19068863
Gm12592	0.0214046	-0.737264	0.737264	0.0019079	0.0031805	0.00200983	0.00491159	0.0610418	19119278
A930018P22Rik	0.173989	-0.736514	0.736514	0.00154707	0.00257765	0.00267977	0.00442043	0.312475	19129817
Tmem139	0.0655067	-0.733959	0.733959	0.00217704	0.00362085	0.00267977	0.00515717	0.14998	19123141
Phyhipl	0.625111	-0.732292	0.732292	0.0033902	0.00563205	0.00558285	0.00638507	0.758911	19138260
Gm10710	0.847633	-0.73171	0.73171	0.000951233	0.00157962	0.00178651	0.00196464	0.912081	19144049
Rnf32	0.14926	-0.731118	0.731118	0.00477773	0.00793066	0.0080393	0.0110511	0.27963	19118106
1700047K16Rik	0.0345609	-0.73013	0.73013	0.00350758	0.00581833	0.00468959	0.00834971	0.0900135	19112329
Gm9803	6.22668e-16	-0.729328	0.729328	0.0608461	0.100875	0.0812863	0.136051	2.45787e-14	1.86505e+07
5033426O07Rik	0.098066	-0.729326	0.729326	0.00365833	0.00606502	0.00580616	0.00884086	0.204086	19117976
Hist1h1e	8.68974e-57	-0.728309	0.728309	0.297747	0.493276	0.276016	0.444745	2.4941e-54	1.75955e+07
Spata48	0.95203	-0.728129	0.728129	0.00170389	0.00282247	0.00401965	0.00392927	0.97518	19146437
Meig1	0.02569	-0.727469	0.727469	0.00866557	0.0143479	0.0104958	0.0159627	0.0707489	1.90956e+07
9130230N09Rik	0.0450551	-0.726237	0.726237	0.00473013	0.00782515	0.00736936	0.0115422	0.11143	1.91076e+07
P2ry1	3.15061e-09	-0.725797	0.725797	0.0301377	0.0498422	0.0424297	0.0722004	5.03324e-08	18875269
Abcb1a	0.40816	-0.723719	0.723719	0.00128039	0.00211449	0.00267977	0.00368369	0.572452	19136526
Pcdh8	0.0607321	-0.722122	0.722122	0.0057121	0.00942272	0.00781599	0.0117878	0.141366	19109383
Gm10115	0.000298275	-0.721907	0.721907	0.0110521	0.0182289	0.0127289	0.0230845	0.00161683	19051628
Kcnh3	0.437638	-0.721604	0.721604	0.00207015	0.00341371	0.00446628	0.00564833	0.599641	19134848
Gm16098	0.391904	-0.721517	0.721517	0.00152211	0.00250983	0.00223314	0.00319253	0.555262	19136933
Retnlg	0.0269911	-0.721506	0.721506	0.00524343	0.0086459	0.00602948	0.0103143	0.0737563	19106620
Zfp109	0.000163499	-0.721355	0.721355	0.00596173	0.00982928	0.00759268	0.0164538	0.000952421	19065275
Lmntd1	0.0912283	-0.72066	0.72066	0.00289954	0.00477826	0.00379634	0.00638507	0.193192	19122100
Hist1h4d	2.25752e-42	-0.720523	0.720523	0.209147	0.344627	0.209692	0.34553	4.11063e-40	1.79233e+07
Nutf2-ps1	1.10656e-42	-0.719481	0.719481	0.204278	0.336362	0.249888	0.381631	2.10545e-40	1.7863e+07
Rnf17	0.154958	-0.719236	0.719236	0.00381243	0.00627643	0.00558285	0.00810413	0.287568	1.91226e+07
Gm3892	0.0346151	-0.717525	0.717525	0.00346963	0.00570531	0.00468959	0.00834971	0.090125	19112339
Gm12319	0.121453	-0.71717	0.71717	0.00261471	0.00429847	0.00379634	0.00613949	0.239763	1.91243e+07
Chst7	0.0761227	-0.716977	0.716977	0.00404272	0.00664515	0.00580616	0.00908644	0.168681	19115740
Gm35940	0.499595	-0.716242	0.716242	0.000949538	0.00155999	0.00178651	0.0024558	0.65456	19139579
Tie1	0.261051	-0.714601	0.714601	0.00519066	0.00851802	0.00759268	0.00982318	0.418383	19125134
Gm10817	0.0861883	-0.714274	0.714274	0.00515722	0.00846123	0.00915587	0.0130157	0.185476	1.91104e+07
1110018N20Rik	0.0374926	-0.713071	0.713071	0.00423695	0.00694559	0.00625279	0.0103143	0.0960514	19108676
Gpr162	0.0526865	-0.712055	0.712055	0.00269778	0.00441933	0.00401965	0.00712181	0.126427	19117405
Pde6g	0.656955	-0.711785	0.711785	0.000674445	0.00110462	0.0015632	0.00196464	0.781358	19142019
AI854703	0.0128643	-0.710929	0.710929	0.00945634	0.0154787	0.0142921	0.0213654	0.0402968	19080997
Gm20618	0.233384	-0.710919	0.710919	0.00101045	0.00165395	0.00133988	0.0024558	0.386566	19135520
Srp54c	5.0754e-08	-0.71003	0.71003	0.0195776	0.0320258	0.0279142	0.050835	6.54583e-07	1.89378e+07
Phf2os1	0.656837	-0.709324	0.709324	0.00157188	0.00257008	0.00290308	0.00343811	0.781358	19140767
Gm14066	0.251641	-0.709287	0.709287	0.000706687	0.00115543	0.0015632	0.00270138	0.407277	1.91353e+07
F2rl1	0.743654	-0.709215	0.709215	0.00151198	0.00247195	0.00334971	0.00294695	0.843964	19149312
Pld6	0.0069917	-0.70879	0.70879	0.00367031	0.00599888	0.00468959	0.0095776	0.0242618	1.91012e+07
Hk3	0.848092	-0.708603	0.708603	0.00105886	0.00173041	0.00178651	0.00196464	0.912081	19144054
Shh	0.0542607	-0.708256	0.708256	0.00816862	0.0133461	0.00692273	0.0108055	0.129197	19110253
Ptp4a1	0.0651695	-0.708028	0.708028	0.00352858	0.00576418	0.00647611	0.0100688	0.149442	1.91129e+07
Acsl6	0.215061	-0.707869	0.707869	0.00271255	0.00443065	0.00401965	0.00589391	0.364531	19128575
Gm29417	0.0755967	-0.706374	0.706374	0.00711418	0.0116082	0.0102724	0.0144892	0.167731	19107051
Papolb	0.0392461	-0.705455	0.705455	0.00207648	0.00338603	0.0031264	0.00613949	0.0998188	19118261
Cd8b1	0.203041	-0.705172	0.705172	0.00158812	0.00258917	0.00200983	0.00343811	0.34974	19132671
Mrvi1	0.036053	-0.704505	0.704505	0.0121905	0.0198655	0.0178651	0.0243124	0.0930421	19086428
Sptb	0.0505693	-0.703956	0.703956	0.00788392	0.0128426	0.0104958	0.0152259	0.122021	19102382
4833419F23Rik	0.747098	-0.703612	0.703612	0.00281944	0.00459168	0.00491291	0.00540275	0.846415	19141133
Gpc5	4.63393e-15	-0.70208	0.70208	0.0664984	0.108183	0.0790531	0.131631	1.67673e-13	18672252
Chp2	0.046626	-0.701977	0.701977	0.00942227	0.0153275	0.012059	0.0171906	0.114314	19098723
Ccl11	0.00885662	-0.700855	0.700855	0.00743599	0.012087	0.00446628	0.00908644	0.0295013	19103633
Gm15688	0.00764511	-0.69968	0.69968	0.00585124	0.00950326	0.00781599	0.0137525	0.0261179	19091647
Il2	1.93459e-13	-0.699561	0.699561	0.0530655	0.086179	0.0701206	0.11665	5.69744e-12	18724853
Gm28967	0.0618428	-0.698463	0.698463	0.00192435	0.00312279	0.00178651	0.00392927	0.143419	19126182
Gm12666	0.0736874	-0.697848	0.697848	0.00286719	0.00465083	0.00558285	0.00884086	0.164166	19115968
Vmn1r15	0.355075	-0.697837	0.697837	0.000999039	0.00162051	0.0015632	0.0024558	0.518974	19137555
Nbeal2	0.290993	-0.696432	0.696432	0.00314887	0.00510272	0.00491291	0.00663065	0.450798	19129951
Hpgd	5.5646e-05	-0.696054	0.696054	0.0375159	0.0607783	0.0390799	0.0574656	0.000368666	18975787
Gm36278	0.148904	-0.695802	0.695802	0.00237276	0.00384337	0.00334971	0.00540275	0.279148	19126982
Plaur	3.63206e-05	-0.69559	0.69559	0.0242861	0.0393324	0.0439929	0.0638507	0.000254122	1.89622e+07
Mapkapk5	0.00291328	-0.69536	0.69536	0.0116271	0.0188277	0.0238946	0.0346267	0.011638	1.9047e+07
Pcdh11x	0.00195512	-0.694878	0.694878	0.00418866	0.00678038	0.00491291	0.0108055	0.00821945	19092174
5430419D17Rik	0.656868	-0.694232	0.694232	0.000876893	0.00141883	0.0015632	0.00196464	0.781358	19142018
Hectd2os	1.56221e-07	-0.692959	0.692959	0.0243065	0.0392938	0.0272443	0.0491159	1.83584e-06	1.89485e+07
Calca	0.0216628	-0.692848	0.692848	0.0114178	0.0184566	0.015632	0.0223477	0.0616535	19084062
Alcam	4.20892e-06	-0.692807	0.692807	0.0502541	0.081232	0.0623046	0.0876719	3.66824e-05	18907100
Nccrp1	0.942062	-0.692473	0.692473	0.000777679	0.00125677	0.00178651	0.00171906	0.969367	19146290
Gm10603	0.232925	-0.691943	0.691943	0.00083334	0.00134623	0.00133988	0.0024558	0.386171	19135510
Cilp2	0.0866924	-0.691865	0.691865	0.00521439	0.00842318	0.00937919	0.0132613	0.186301	19110050
Gm19277	0.248909	-0.691722	0.691722	0.00426044	0.0068815	0.00602948	0.00810413	0.404705	1.91267e+07
Gm4316	0.0482167	-0.689894	0.689894	0.00399728	0.00644828	0.00781599	0.0120334	0.117381	1.91072e+07
Unc13c	2.23818e-12	-0.688768	0.688768	0.0763519	0.123072	0.0806163	0.126965	5.69945e-11	18724215
Slc6a2	0.0150769	-0.688622	0.688622	0.00412961	0.00665588	0.00714605	0.012279	0.04587	19098919
Gm21269	0.121435	-0.688468	0.688468	0.00318058	0.00512573	0.00379634	0.00613949	0.239763	1.91243e+07
Sox6os	0.0561128	-0.687681	0.687681	0.00442897	0.00713371	0.00714605	0.0110511	0.132897	19110060
Mogat1	0.0369412	-0.686155	0.686155	0.00373164	0.00600416	0.00491291	0.00859528	0.0948827	1.91122e+07
2500002B13Rik	0.00399607	-0.685818	0.685818	0.00965968	0.0155387	0.0158553	0.024558	0.0151823	1.90661e+07
Rnd1	0.0575408	-0.684397	0.684397	0.008155	0.0131053	0.0122823	0.0171906	0.135578	1.91007e+07
Sh3tc2	0.414368	-0.684355	0.684355	0.00178726	0.00287209	0.00290308	0.00392927	0.578524	19136319
Syn2	1.9172e-06	-0.684024	0.684024	0.0248165	0.0398706	0.0267977	0.046169	1.81004e-05	1.89704e+07
Mageb3	0.514589	-0.683257	0.683257	0.00129607	0.00208119	0.00223314	0.00294695	0.667794	19139170
Thpo	0.0741542	-0.683219	0.683219	0.00421698	0.00677129	0.00558285	0.00884086	0.164939	19116016
Gm15328	0.355075	-0.681446	0.681446	0.00138571	0.00222232	0.0015632	0.0024558	0.518974	19137555
Kcne4	9.22355e-05	-0.679476	0.679476	0.0145948	0.0233744	0.0212148	0.0351179	0.000575928	1.90187e+07
Gm16564	0.251869	-0.679273	0.679273	0.00127486	0.00204147	0.0015632	0.00270138	0.407492	1.91353e+07
Spib	0.270707	-0.678135	0.678135	0.00263337	0.00421358	0.00379634	0.00540275	0.427735	19131035
Gramd2	0.161361	-0.677726	0.677726	0.00260146	0.00416134	0.00602948	0.00859528	0.295244	1.91222e+07
Mgl2	0.251641	-0.677358	0.677358	0.00108298	0.00173191	0.0015632	0.00270138	0.407277	1.91353e+07
Gm32017	0.00493142	-0.676293	0.676293	0.00988932	0.0158034	0.0107191	0.0179273	0.018099	19080121
Gm9754	0.337567	-0.675724	0.675724	0.00113463	0.00181246	0.00133988	0.00221022	0.500425	19137765
Jhy	0.0206194	-0.675136	0.675136	0.00575076	0.00918251	0.00602948	0.0105599	0.059171	1.91045e+07
A830035O19Rik	0.00041243	-0.674893	0.674893	0.00815092	0.0130128	0.00982582	0.0189096	0.00214105	1.90633e+07
Pcdhga2	0.0121505	-0.673868	0.673868	0.00675874	0.0107825	0.00870925	0.0144892	0.0384377	1.9093e+07
Gm10447	0.0724256	-0.673766	0.673766	0.00362851	0.00578831	0.00401965	0.00687623	0.161843	19119743
Mmp28	0.189913	-0.672448	0.672448	0.00111845	0.00178256	0.00178651	0.00319253	0.333159	19132878
BC055402	0.0415829	-0.672416	0.672416	0.0070853	0.0112921	0.0104958	0.0154715	0.1046	1.91003e+07
Gm9903	0.0653753	-0.671107	0.671107	0.00161928	0.00257837	0.00267977	0.00515717	0.149826	19123130
Gm30339	0.0752389	-0.670533	0.670533	0.00533216	0.00848699	0.00759268	0.0112967	0.167029	19111872
Cfap61	0.0276658	-0.670373	0.670373	0.00996552	0.01586	0.0109424	0.0164538	0.0752237	1.90954e+07
Hist1h4b	0.0198227	-0.66961	0.66961	0.00373355	0.00593875	0.00714605	0.0120334	0.0573319	19101131
Mei4	0.182685	-0.668076	0.668076	0.00225485	0.00358285	0.00290308	0.00466601	0.324617	1.91296e+07
Hist1h2bb	0.000278685	-0.667944	0.667944	0.0233938	0.0371683	0.0299241	0.0446955	0.0015248	19010283
Spon2	0.000320121	-0.667182	0.667182	0.0165251	0.0262414	0.0212148	0.03389	0.00171223	19030000
Gm10931	0.264844	-0.666865	0.666865	0.002817	0.00447232	0.00357302	0.00515717	0.422504	19131238
Gm45447	0.0143047	-0.666724	0.666724	0.00829674	0.0131708	0.011389	0.0176817	0.0440029	19088099
Gm20544	0.015555	-0.666611	0.666611	0.00748747	0.0118852	0.0100491	0.0159627	0.0470541	1.90919e+07
Inpp5j	0.1156	-0.666575	0.666575	0.00133716	0.00212247	0.00357302	0.00589391	0.231144	19124489
Lrrc75aos2	0.086055	-0.665267	0.665267	0.00469351	0.00744326	0.00915587	0.0130157	0.18526	1.91103e+07
Aldh1a7	0.119022	-0.664411	0.664411	0.0014348	0.00227405	0.00245645	0.00442043	0.236202	19127794
Ibsp	1.75829e-05	-0.664359	0.664359	0.134892	0.213785	0.0752568	0.100688	0.000134001	1.8906e+07
Shox2	2.84291e-06	-0.664326	0.664326	0.0440967	0.0698856	0.0477892	0.0714637	2.58688e-05	18927640
Lpar3	0.0275373	-0.664325	0.664325	0.00441503	0.00699705	0.00915587	0.0142436	0.0749474	19099139
Sox7	0.354602	-0.664209	0.664209	0.00120137	0.0019038	0.0015632	0.0024558	0.518626	19137547
Hist1h2be	6.5973e-08	-0.663925	0.663925	0.0423435	0.0670885	0.0553819	0.0849705	8.30005e-07	1.88743e+07
Gm26672	0.100073	-0.662397	0.662397	0.00336085	0.00531925	0.00424297	0.00687623	0.207194	19121682
Carmn	9.77499e-10	-0.662185	0.662185	0.0408086	0.0645787	0.0513622	0.084725	1.67109e-08	1.88432e+07
Gm41505	0.116547	-0.661546	0.661546	0.00255154	0.00403597	0.00357302	0.00589391	0.232528	19124544
Gm6787	0.507738	-0.661286	0.661286	0.00134369	0.00212503	0.00200983	0.00270138	0.661949	19139371
Gm46633	4.27242e-05	-0.660489	0.660489	0.0112596	0.0177971	0.0158553	0.0289784	0.000292912	19026889
Ccdc170	0.00514351	-0.659885	0.659885	0.00934988	0.0147724	0.0125056	0.0201375	0.0187353	19076074
Dynlt1b	0.14787	-0.659702	0.659702	0.00425609	0.00672358	0.00781599	0.0108055	0.277855	19118352
1700081N11Rik	0.19575	-0.658803	0.658803	0.00357335	0.0056415	0.00558285	0.00785855	0.340472	19124902
Ribc2	0.0358829	-0.658221	0.658221	0.00451785	0.00712977	0.00602948	0.0100688	0.0927412	1.91089e+07
Rgs14	0.40045	-0.656744	0.656744	0.00147974	0.00233284	0.00245645	0.00343811	0.564278	19136725
Hist2h2ac	9.08316e-07	-0.655757	0.655757	0.0395985	0.0623852	0.0515855	0.0776031	9.14473e-06	1.89083e+07
Gm37233	9.42493e-05	-0.655619	0.655619	0.0165779	0.026115	0.0254578	0.0405206	0.000587852	1.90087e+07
Gm43577	0.0277671	-0.653681	0.653681	0.00248339	0.00390682	0.0031264	0.00638507	0.0754506	19116041
Gm10570	0.000715975	-0.653631	0.653631	0.00807656	0.0127054	0.00870925	0.016945	0.00348475	1.90711e+07
Adcy7	0.000769336	-0.653385	0.653385	0.0191535	0.0301257	0.0350603	0.0493615	0.00369797	1.90126e+07
Cldn2	0.192865	-0.653267	0.653267	0.00394612	0.00620616	0.00535954	0.00761297	0.336674	19125135
Fgd3	0.000105683	-0.652797	0.652797	0.0164145	0.025807	0.0216615	0.035609	0.000651016	1.90187e+07
Ocel1	1.19606e-16	-0.652272	0.652272	0.0760765	0.119565	0.109201	0.171415	5.02583e-15	18578093
Reps2	1.02451e-08	-0.651806	0.651806	0.0245455	0.0385643	0.034837	0.0613949	1.50338e-07	18905136
Gm43660	0.225453	-0.651785	0.651785	0.00198842	0.00312402	0.00245645	0.00392927	0.377032	19132261
Gm7160	0.00994959	-0.65135	0.65135	0.00753301	0.0118316	0.012059	0.0189096	0.0325326	19083178
Gm43514	0.00982917	-0.650754	0.650754	0.00382028	0.0059978	0.00468959	0.00933202	0.0322197	19103491
Itgb7	0.134107	-0.650722	0.650722	0.00420681	0.0066045	0.00647611	0.00933202	0.258476	19119608
Hist1h2an	0.0801885	-0.649702	0.649702	0.0347889	0.0545783	0.0355069	0.0424853	0.175511	19078937
4932441J04Rik	0.233392	-0.649332	0.649332	0.00254446	0.00399083	0.00491291	0.00687623	0.386566	19127749
Slc16a9	5.70214e-09	-0.648715	0.648715	0.0446037	0.0699284	0.0582849	0.0913556	8.70695e-08	18844260
Gm20443	0.132498	-0.648371	0.648371	0.00131203	0.00205648	0.00178651	0.00343811	0.256041	19130642
Cdh5	0.169789	-0.648155	0.648155	0.0101271	0.0158709	0.0116123	0.0149804	0.306721	19114733
Hist1h3e	7.15451e-07	-0.648042	0.648042	0.0523134	0.0819772	0.0692273	0.0982318	7.39649e-06	18875281
Gm22146	0.40903	-0.646346	0.646346	0.00207104	0.00324159	0.00267977	0.00368369	0.573292	19136543
Dnajc28	0.000133278	-0.646083	0.646083	0.0199911	0.0312844	0.0265744	0.0415029	0.000796373	19009581
Rnf207	0.0136995	-0.645916	0.645916	0.00477096	0.00746527	0.00468959	0.00908644	0.0424109	1.91057e+07
Gm30082	0.190259	-0.644849	0.644849	0.00146221	0.00228627	0.00178651	0.00319253	0.333632	19132888
P4ha3	3.85231e-06	-0.644098	0.644098	0.036623	0.057233	0.0567218	0.081778	3.4012e-05	18914882
5830487J09Rik	0.104285	-0.644045	0.644045	0.00429859	0.00671742	0.00625279	0.00933202	0.213461	19117619
4930502E18Rik	0.519329	-0.643863	0.643863	0.00169888	0.00265452	0.00245645	0.00319253	0.671475	1.9139e+07
Gm19705	0.00106682	-0.643491	0.643491	0.0168772	0.026364	0.0214381	0.0329077	0.00491179	19041147
Cd80	0.081273	-0.643193	0.643193	0.00257958	0.00402874	0.00334971	0.00589391	0.177447	19122495
D230022J07Rik	0.0364934	-0.642828	0.642828	0.0110727	0.0172888	0.0142921	0.0201375	0.0940322	19092191
Thsd7a	2.00253e-19	-0.642544	0.642544	0.155267	0.242384	0.146047	0.221022	1.08341e-17	18454833
Nkain2	0.0016785	-0.641997	0.641997	0.0124143	0.0193724	0.0160786	0.0257859	0.00722884	19057358
Ccr1	0.444666	-0.641885	0.641885	0.00379619	0.00592346	0.00558285	0.00687623	0.606297	19133844
B830017H08Rik	0.140156	-0.641808	0.641808	0.00259611	0.00405066	0.00468959	0.00712181	0.266464	1.91235e+07
Pparg	0.00583551	-0.641686	0.641686	0.0134998	0.0210617	0.0196516	0.0287328	0.0208522	1.90624e+07
Gm47210	0.0203023	-0.641594	0.641594	0.00383255	0.00597898	0.00491291	0.00908644	0.0584594	19107758
Gm48829	0.175066	-0.641407	0.641407	0.00095946	0.00149661	0.0015632	0.00294695	0.313644	19133081
Man2c1os	0.0109812	-0.641307	0.641307	0.00744298	0.0116091	0.0109424	0.0174361	0.0353039	1.90866e+07
Hist1h3i	0.000242319	-0.641002	0.641002	0.0160467	0.0250234	0.0243412	0.0380648	0.00134848	19020317
Gm44549	0.660043	-0.640819	0.640819	0.000903956	0.00140946	0.00178651	0.00221022	0.781358	19141820
Myl6b	4.39066e-06	-0.638234	0.638234	0.0180286	0.0280601	0.0247879	0.0427308	3.80739e-05	1.89829e+07
Usp43	0.0401607	-0.637212	0.637212	0.00457866	0.00712128	0.00826262	0.0127701	0.101626	19104567
Myf5	0.0101222	-0.635417	0.635417	0.00471044	0.00731714	0.00781599	0.0135069	0.0330181	1.90939e+07
Gm14410	9.09682e-05	-0.634909	0.634909	0.0175493	0.0272512	0.0272443	0.0427308	0.000569485	19004405
Gm14230	0.0300007	-0.63376	0.63376	0.00518067	0.00803835	0.00647611	0.0108055	0.0804102	19106268
Gm31282	0.292067	-0.633417	0.633417	0.00394311	0.00611669	0.00491291	0.00663065	0.451677	19129986
Tmem267	2.08196e-11	-0.633229	0.633229	0.0549168	0.0851778	0.073247	0.115668	4.66966e-10	18760040
Ajm1	0.014958	-0.633057	0.633057	0.0104658	0.0162309	0.0158553	0.0230845	0.0455773	19079590
Nacad	0.0100913	-0.633015	0.633015	0.00568371	0.00881432	0.0104958	0.016945	0.0329452	1.90869e+07
Zfp52	1.48037e-05	-0.632515	0.632515	0.029652	0.0459684	0.0448861	0.0660609	0.0001151	18950663
Hrk	0.059435	-0.632446	0.632446	0.00224841	0.00348547	0.00245645	0.00491159	0.139046	19123320
B230303O12Rik	0.1235	-0.631899	0.631899	0.0053893	0.00835127	0.00826262	0.0115422	0.243124	1.91157e+07
Mapk12	0.148284	-0.631212	0.631212	0.00297551	0.00460867	0.00513622	0.00761297	0.278354	1.91231e+07
Vav3	7.46748e-23	-0.630543	0.630543	0.138819	0.214912	0.148057	0.234037	5.49802e-21	18379400
Atp1a2	3.97405e-08	-0.630514	0.630514	0.0593609	0.0918977	0.0520322	0.081778	5.19264e-07	1.88759e+07
Gm31946	0.0303627	-0.629548	0.629548	0.00382064	0.00591083	0.00424297	0.00785855	0.0811624	19112769
Gm44081	0.132472	-0.628626	0.628626	0.00103868	0.0016059	0.00178651	0.00343811	0.256041	19130641
Rims2	0.659549	-0.628021	0.628021	0.000848388	0.00131114	0.00178651	0.00221022	0.781358	19141814
Gm26826	0.00169348	-0.62728	0.62728	0.00860363	0.0132896	0.0147387	0.0240668	0.00728587	19060669
Rtl8c	0.0205495	-0.627098	0.627098	0.00636907	0.00983675	0.00870925	0.013998	0.0590406	1.90975e+07
Gm6938	0.189878	-0.62694	0.62694	0.00149599	0.00231023	0.00178651	0.00319253	0.333159	19132877
C1qtnf7	0.00351911	-0.626692	0.626692	0.012589	0.0194377	0.0165252	0.0255403	0.013668	19063417
4930599N23Rik	0.0218939	-0.626002	0.626002	0.00595474	0.00918984	0.00759268	0.0125246	0.0622171	19100789
Myct1	0.243213	-0.625919	0.625919	0.00195263	0.00301328	0.00290308	0.00442043	0.397853	19131840
Piwil2	0.264777	-0.625817	0.625817	0.0050911	0.00785599	0.00781599	0.0100688	0.422504	1.9125e+07
9530036M11Rik	0.144519	-0.624667	0.624667	0.0017452	0.00269084	0.00200983	0.00368369	0.27277	1.91304e+07
Gpr156	0.258595	-0.623513	0.623513	0.00227392	0.00350325	0.00334971	0.00491159	0.415588	19131447
Gm30564	0.660881	-0.62332	0.62332	0.000744509	0.00114685	0.00200983	0.0024558	0.781358	19141610
Gm12305	0.292464	-0.623281	0.623281	0.000991879	0.00152787	0.00223314	0.00343811	0.452209	19134692
4930505A04Rik	0.140067	-0.623224	0.623224	0.00106184	0.00163557	0.00111657	0.0024558	0.266416	19133497
Col6a6	0.446484	-0.623036	0.623036	0.00356618	0.00549232	0.00602948	0.00736739	0.607338	19133457
Gm49164	0.007262	-0.622653	0.622653	0.0063707	0.00980899	0.0100491	0.0166994	0.0250254	19085157
E030013I19Rik	0.0274088	-0.622511	0.622511	0.00521257	0.00802502	0.00602948	0.0103143	0.0747048	19106726
A830012C17Rik	0.0571893	-0.622428	0.622428	0.00602449	0.00927449	0.00937919	0.0137525	0.134973	19105718
Gm3411	0.299552	-0.622397	0.622397	0.00291907	0.0044937	0.00558285	0.00736739	0.459393	19129314
Gm33054	0.175031	-0.621635	0.621635	0.00133966	0.00206122	0.0015632	0.00294695	0.313615	19133080
Gm11100	0.104678	-0.620762	0.620762	0.00328775	0.00505553	0.00446628	0.00712181	0.214007	19121506
Stc2	5.19378e-38	-0.620389	0.620389	0.346867	0.533234	0.256364	0.387033	8.29731e-36	17930935
Gm43256	0.298094	-0.619657	0.619657	0.00385561	0.00592418	0.00535954	0.00712181	0.457778	19129564
Enpp3	6.76576e-09	-0.619212	0.619212	0.0531838	0.0816922	0.0538187	0.0861984	1.02296e-07	18854905
Ccdc63	0.0896696	-0.618168	0.618168	0.00387677	0.00595055	0.00513622	0.00810413	0.190882	1.91187e+07
Rps6ka4	0.0635024	-0.61812	0.61812	0.0037966	0.0058273	0.00625279	0.00982318	0.146386	19113145
Gm7324	2.27771e-07	-0.61749	0.61749	0.0324837	0.0498366	0.0460027	0.072446	2.5991e-06	1.89056e+07
Perm1	0.489655	-0.616419	0.616419	0.0010793	0.00165464	0.0015632	0.00221022	0.645981	1.91398e+07
Ptprn	0.434269	-0.616411	0.616411	0.00198271	0.00303961	0.00401965	0.00515717	0.596328	19135286
5330417C22Rik	0.337323	-0.615116	0.615116	0.000778066	0.00119175	0.00133988	0.00221022	0.500239	19137761
Dmrta2	0.355922	-0.612921	0.612921	0.00279514	0.00427475	0.00446628	0.00589391	0.51975	19132647
Iqcg	0.0192512	-0.611747	0.611747	0.00839723	0.0128319	0.0116123	0.0176817	0.0559751	19090439
Iqcd	0.0210531	-0.611728	0.611728	0.00778494	0.0118961	0.0104958	0.0162083	0.0602727	19093670
Gm17501	0.000230587	-0.611308	0.611308	0.01994	0.0304613	0.0326038	0.0481336	0.00128955	19003160
Cdh10	0.0530683	-0.610949	0.610949	0.00316937	0.00484046	0.00401965	0.00712181	0.127037	1.91175e+07
Slc13a4	0.0200798	-0.610542	0.610542	0.00726337	0.01109	0.00848593	0.0137525	0.0579369	1.90978e+07
Tex26	0.0822232	-0.610068	0.610068	0.00332122	0.00506928	0.00468959	0.00761297	0.179009	1.9119e+07
AW495222	0.280274	-0.60984	0.60984	0.00278621	0.00425201	0.00424297	0.00589391	0.438566	19130609
Gm3336	0.10744	-0.608504	0.608504	0.00542303	0.00826837	0.00937919	0.0130157	0.218179	19112372
Gm34961	0.00418265	-0.608409	0.608409	0.00864974	0.0131872	0.0111657	0.018664	0.0157571	19077549
C1rb	3.10656e-06	-0.608091	0.608091	0.0326867	0.0498225	0.0468959	0.0704813	2.79673e-05	1.89301e+07
Nuggc	0.104882	-0.608018	0.608018	0.00223733	0.00341005	0.0031264	0.00540275	0.214284	19124957
Gm15829	0.527095	-0.60798	0.60798	0.0016928	0.00258003	0.00290308	0.00368369	0.677482	1.91386e+07
Gm16751	0.0863465	-0.607781	0.607781	0.00393076	0.00599015	0.00669942	0.0100688	0.185722	19114961
Meis2	0.0259354	-0.607057	0.607057	0.00357725	0.00544868	0.00379634	0.00736739	0.0713782	19113176
BC049762	0.381667	-0.605423	0.605423	0.001274	0.00193829	0.00200983	0.00294695	0.54454	19137139
Gm12655	0.258228	-0.605271	0.605271	0.0022316	0.00339485	0.00334971	0.00491159	0.415234	19131436
Gm48742	0.00506564	-0.605206	0.605206	0.0160249	0.024377	0.0198749	0.029224	0.0184954	1.90604e+07
Itga10	7.40199e-08	-0.603217	0.603217	0.0497681	0.0756028	0.057615	0.0879175	9.23695e-07	1.88707e+07
Hils1	0.489139	-0.60271	0.60271	0.000797608	0.00121122	0.0015632	0.00221022	0.645631	1.91398e+07
Zbtb8b	0.201996	-0.602618	0.602618	0.00416894	0.00633041	0.00602948	0.00834971	0.348543	19124487
Ntn1	8.17648e-06	-0.602554	0.602554	0.0467825	0.0710346	0.0571684	0.0812868	6.69832e-05	18922811
A730071L15Rik	0.374104	-0.602551	0.602551	0.00442177	0.00671402	0.00714605	0.00884086	0.537709	19130101
Map3k21	0.930599	-0.602377	0.602377	0.00112827	0.00171295	0.00357302	0.00368369	0.962837	19144655
B3gnt5	0.0169648	-0.602188	0.602188	0.0129945	0.0197259	0.0216615	0.0297151	0.0505957	1.90714e+07
Myo7a	0.0905529	-0.602024	0.602024	0.00872922	0.0132496	0.0140688	0.018664	0.192295	19103428
Kif14	0.0879737	-0.602009	0.602009	0.011165	0.0169465	0.0200983	0.0255403	0.188147	19095521
Rab37	7.17289e-05	-0.601801	0.601801	0.0181204	0.0274997	0.0203216	0.0343811	0.000461847	1.90186e+07
Asic3	0.19187	-0.60168	0.60168	0.00310308	0.00470887	0.00535954	0.00761297	0.335759	19125089
Gm20621	0.00116329	-0.60145	0.60145	0.0142513	0.0216226	0.0200983	0.0311886	0.00528269	19044829
Gm47079	0.161129	-0.601167	0.601167	0.00252383	0.00382851	0.00379634	0.00589391	0.295075	19126576
Zfp791	0.00169605	-0.600425	0.600425	0.0135962	0.0206141	0.0178651	0.0279961	0.00729328	1.90534e+07
Commd5	5.28922e-12	-0.6004	0.6004	0.0644193	0.0976684	0.0899955	0.137525	1.27227e-10	1.87141e+07
Nnmt	0.0470962	-0.600313	0.600313	0.00532949	0.00807976	0.00602948	0.00982318	0.1152	19111124
Pgm5	0.00443729	-0.599846	0.599846	0.00549422	0.00832679	0.00692273	0.0130157	0.0165436	19090281
Platr9	0.747205	-0.599633	0.599633	0.00309808	0.00469462	0.00491291	0.00540275	0.846478	19141135
Fabp3	1.79701e-30	-0.599226	0.599226	0.295482	0.447627	0.267307	0.378929	2.04232e-28	18062305
Gm45441	2.64713e-05	-0.598658	0.598658	0.0133051	0.0201479	0.0196516	0.0343811	0.000192306	19012018
Psme2b	0.0125083	-0.598575	0.598575	0.00674367	0.0102114	0.0102724	0.0164538	0.0394148	19089376
Npr1	0.00171415	-0.597748	0.597748	0.0120744	0.0182728	0.0178651	0.0279961	0.00735616	19053487
Map3k7cl	0.414767	-0.597364	0.597364	0.00260893	0.00394718	0.00290308	0.00392927	0.578794	19136327
Higd1b	0.215249	-0.596547	0.596547	0.00589072	0.00890731	0.00401965	0.00589391	0.364685	19128582
Fam241a	1.16988e-18	-0.595209	0.595209	0.117769	0.177913	0.127736	0.198674	5.94915e-17	1.85017e+07
Dnhd1	0.000105195	-0.595172	0.595172	0.0218598	0.0330226	0.0299241	0.0459234	0.000648245	19000099
Gm14320	0.829778	-0.594947	0.594947	0.00129996	0.00196348	0.00223314	0.0024558	0.90218	19143638
Apoa2	0.0102991	-0.594829	0.594829	0.00520924	0.00786749	0.00781599	0.0135069	0.0335073	1.9094e+07
Gm47015	0.233476	-0.594654	0.594654	0.00103575	0.0015641	0.00133988	0.0024558	0.386638	19135522
Cmklr1	0.00446718	-0.59413	0.59413	0.021034	0.0317521	0.0272443	0.0380648	0.016644	19046284
Fbxl13	0.0274924	-0.593174	0.593174	0.00194678	0.00293684	0.00178651	0.00442043	0.0748833	19121724
Trnp1	2.44751e-05	-0.592952	0.592952	0.0232216	0.0350258	0.0319339	0.0500982	0.000179809	18981250
Gm48529	0.0339326	-0.591997	0.591997	0.00422645	0.00637066	0.00714605	0.0115422	0.0886615	19105624
9430085M18Rik	0.0129149	-0.591453	0.591453	0.00788278	0.0118775	0.0104958	0.0166994	0.040418	19089145
Gm30124	0.204885	-0.59089	0.59089	0.00384349	0.00578897	0.00625279	0.00859528	0.351771	19124282
Gm44731	0.0551679	-0.590776	0.590776	0.00680846	0.0102539	0.00893256	0.0132613	0.130989	19106210
1700034H15Rik	0.838447	-0.590469	0.590469	0.00145014	0.00218353	0.00200983	0.00221022	0.907176	1.91438e+07
Ly9	0.392282	-0.58936	0.58936	0.00142767	0.00214805	0.00223314	0.00319253	0.555613	19136940
Calcb	0.00699576	-0.587736	0.587736	0.00712391	0.0107064	0.00848593	0.0147348	0.0242709	19089006
Defb25	0.530665	-0.585674	0.585674	0.00190803	0.00286346	0.00334971	0.00417485	0.679441	1.91381e+07
Scn1a	0.000123547	-0.585	0.585	0.0202993	0.0304498	0.0221081	0.0361002	0.000747997	19018968
Cmbl	3.59844e-12	-0.584854	0.584854	0.0878206	0.131721	0.0971416	0.147348	8.85929e-11	1.86967e+07
Gm13778	0.0868552	-0.584718	0.584718	0.00272798	0.00409128	0.00357302	0.00613949	0.186556	19122335
Arsi	0.000137776	-0.584557	0.584557	0.0146209	0.0219252	0.0200983	0.0333988	0.000820067	1.90249e+07
Gm38973	0.0080361	-0.584118	0.584118	0.0213333	0.0319812	0.0279142	0.0380648	0.027233	1.90525e+07
Qrich2	0.180855	-0.583819	0.583819	0.00495116	0.00742086	0.00781599	0.0105599	0.322005	1.91206e+07
Adcy5	6.61321e-06	-0.583791	0.583791	0.0290414	0.0435267	0.0446628	0.0670432	5.51937e-05	1.89422e+07
Syn1	0.104263	-0.583664	0.583664	0.00260598	0.00390545	0.00446628	0.00712181	0.213441	19121477
P2rx6	0.224838	-0.583385	0.583385	0.00443156	0.00664007	0.00848593	0.0110511	0.376247	19122192
Nsg2	9.58021e-05	-0.583217	0.583217	0.0313365	0.0469479	0.0410898	0.0594303	0.000596607	1.8978e+07
Enpep	0.00113924	-0.582916	0.582916	0.020008	0.0299694	0.0238946	0.0358546	0.00518876	19036816
Gm50203	0.0594662	-0.582141	0.582141	0.0034559	0.00517372	0.00580616	0.00933202	0.139069	1.91136e+07
Xlr	0.00905577	-0.581452	0.581452	0.00630403	0.00943306	0.00848593	0.0144892	0.0300169	19091114
Rasl10a	0.381778	-0.579732	0.579732	0.00115274	0.00172285	0.00200983	0.00294695	0.544622	19137141
Rab42	0.00257215	-0.579731	0.579731	0.0147008	0.0219714	0.0218848	0.0324165	0.0104478	1.90494e+07
Slc9a7	0.182631	-0.579411	0.579411	0.00191711	0.00286462	0.00290308	0.00466601	0.324554	1.91296e+07
Gm14137	0.898183	-0.579407	0.579407	0.00290714	0.00434395	0.00714605	0.00736739	0.943714	19143545
4930426I24Rik	0.0158023	-0.579279	0.579279	0.0116248	0.0173687	0.0165252	0.0238212	0.0476489	19078974
Tgm2	3.9381e-05	-0.579111	0.579111	0.0261403	0.0390517	0.0372934	0.0559921	0.000273189	1.89752e+07
Usp35	0.00104087	-0.578633	0.578633	0.021669	0.0323612	0.0314873	0.0449411	0.00481192	19022035
Gpihbp1	0.368696	-0.5781	0.5781	0.00400389	0.00597734	0.00558285	0.00712181	0.53295	1.91316e+07
4833412C05Rik	5.53606e-05	-0.57765	0.57765	0.0186522	0.0278369	0.0279142	0.0442043	0.000367494	18998018
Gm45605	0.00465316	-0.577327	0.577327	0.0117581	0.0175441	0.014962	0.0233301	0.0172271	1.90695e+07
Hist1h2bk	0.0487602	-0.577233	0.577233	0.0127166	0.018973	0.0236713	0.0304519	0.118562	19082730
Chil1	0.0372266	-0.576055	0.576055	0.00443404	0.00661011	0.00491291	0.00859528	0.0954999	19112217
Dnah6	0.0351467	-0.575653	0.575653	0.00088846	0.00132412	0.0015632	0.00392927	0.0911724	19124145
Fam163a	0.519018	-0.574888	0.574888	0.00108444	0.00161535	0.00245645	0.00319253	0.671279	1.9139e+07
Pcdh9	3.41318e-19	-0.574843	0.574843	0.147356	0.219489	0.1523	0.229617	1.80058e-17	18448285
4930525G20Rik	0.192756	-0.574532	0.574532	0.00397523	0.00591989	0.00535954	0.00761297	0.336674	19125130
Lmntd2	0.530774	-0.574293	0.574293	0.00183054	0.00272557	0.00334971	0.00417485	0.679477	1.91381e+07
Clip4	5.25832e-07	-0.573917	0.573917	0.0453249	0.0674688	0.0647611	0.0938114	5.60733e-06	18878850
Galnt3	0.688967	-0.573845	0.573845	0.00396802	0.00590634	0.00759268	0.00834971	0.802902	19138669
Ankrd34a	0.0194318	-0.572989	0.572989	0.00382506	0.00569017	0.00580616	0.0103143	0.0563553	19104701
Gm11205	0.171804	-0.570837	0.570837	0.00349981	0.00519857	0.00424297	0.00638507	0.309767	19126168
Adam32	0.651562	-0.570757	0.570757	0.00242811	0.00360647	0.00357302	0.00417485	0.778491	19140160
D330050G23Rik	0.267163	-0.570713	0.570713	0.00455897	0.00677124	0.0080393	0.0103143	0.424483	19124859
Rpl10-ps3	2.86703e-55	-0.570382	0.570382	0.470243	0.698272	0.451541	0.590373	7.95906e-53	1.74638e+07
Chrnb4	0.661236	-0.570336	0.570336	0.00123866	0.00183925	0.00223314	0.00270138	0.781358	19141406
Kit	2.10817e-36	-0.570187	0.570187	0.417021	0.619157	0.30996	0.43836	3.13156e-34	1.79008e+07
Ogn	1.87493e-56	-0.569933	0.569933	0.708711	1.05205	0.376284	0.557711	5.29169e-54	1.74869e+07
4930515G01Rik	0.140153	-0.56926	0.56926	0.00422508	0.00626902	0.00692273	0.00982318	0.266464	19119257
Efcab7	1.44346e-05	-0.56888	0.56888	0.0255017	0.0378285	0.034837	0.0542731	0.000112643	18969827
Gm4129	0.320452	-0.568336	0.568336	0.00166169	0.00246398	0.00290308	0.00417485	0.481887	1.91341e+07
Traf1	0.00606034	-0.567838	0.567838	0.0160669	0.023816	0.019205	0.0282417	0.0215239	19063582
Swap70	8.88115e-29	-0.567587	0.567587	0.21576	0.319766	0.250335	0.361493	9.34121e-27	1.81135e+07
Gm11615	0.0229413	-0.567005	0.567005	0.00563625	0.00834979	0.00937919	0.0147348	0.0645221	19096934
Cd300lg	0.265009	-0.566506	0.566506	0.00315553	0.00467312	0.00357302	0.00515717	0.422527	19131243
Olfr1369-ps1	0.295344	-0.56634	0.56634	0.00620739	0.00919167	0.00513622	0.00687623	0.454752	19129779
Gm10642	0.0130226	-0.565633	0.565633	0.0053672	0.00794366	0.00647611	0.0115422	0.0406946	1.90997e+07
Rgn	0.202806	-0.565534	0.565534	0.00484218	0.00716612	0.00602948	0.00834971	0.349507	19124525
Gm20633	0.00764337	-0.564662	0.564662	0.00803479	0.0118838	0.0102724	0.016945	0.0261179	19085021
Catspere2	0.00320309	-0.564077	0.564077	0.0105544	0.0156041	0.0138455	0.0223477	0.0126083	19068536
Gprin3	9.41971e-15	-0.563696	0.563696	0.104688	0.154735	0.123046	0.183939	3.26872e-13	1.8594e+07
Gm12184	7.0013e-11	-0.563143	0.563143	0.0756852	0.111824	0.0991514	0.145874	1.43884e-09	18724055
A330074K22Rik	0.00546586	-0.563106	0.563106	0.00870489	0.012861	0.00982582	0.0166994	0.0197438	19083320
D330050I16Rik	0.00079757	-0.563085	0.563085	0.0246839	0.0364686	0.0375167	0.0523084	0.0038185	19009019
Gm10053	0.0719728	-0.563002	0.563002	0.00753025	0.0111247	0.0125056	0.0171906	0.161104	19102881
Ccsap	5.24225e-23	-0.562825	0.562825	0.184612	0.272702	0.181108	0.27333	3.92798e-21	18322524
Lrrc71	0.090749	-0.562695	0.562695	0.000921777	0.00136149	0.00111657	0.00270138	0.19251	1.91313e+07
Cemip	0.0282306	-0.562525	0.562525	0.017382	0.0256706	0.0283609	0.0365914	0.0764647	1.90691e+07
Ddc	0.000653699	-0.562248	0.562248	0.0174308	0.0257377	0.027021	0.040275	0.00321234	19024873
Gm45601	0.0283841	-0.561965	0.561965	0.00114948	0.00169695	0.000893256	0.00294695	0.0767698	19126985
Gm37864	0.967115	-0.561351	0.561351	0.00159099	0.00234775	0.00290308	0.00294695	0.982785	19145249
Ranbp3l	0.287883	-0.561276	0.561276	0.00293157	0.00432575	0.00468959	0.00638507	0.447331	19130174
Ccdc40	0.000476336	-0.561223	0.561223	0.0110446	0.0162965	0.0145154	0.0250491	0.00243106	19050226
Ttc36	0.652092	-0.561065	0.561065	0.0018305	0.00270065	0.00357302	0.00417485	0.778959	19140169
6430571L13Rik	0.094917	-0.561022	0.561022	0.0054004	0.00796728	0.00759268	0.0110511	0.199025	19114141
1810012K16Rik	0.659944	-0.560589	0.560589	0.0017168	0.00253206	0.00267977	0.00319253	0.781358	19140998
A330041J22Rik	0.00113846	-0.560489	0.560489	0.0177551	0.0261846	0.0209915	0.0324165	0.00518662	19042619
Tmem253	0.369591	-0.56046	0.56046	0.000993357	0.00146494	0.00178651	0.00270138	0.533832	19137347
Gm10602	1.1019e-05	-0.559559	0.559559	0.0324912	0.0478861	0.0430996	0.0645874	8.81003e-05	18950564
Pak3	1.43813e-05	-0.558058	0.558058	0.0380448	0.0560128	0.0500223	0.072446	0.000112279	18941046
Gm16279	0.370574	-0.558	0.558	0.00374452	0.00551279	0.00602948	0.00761297	0.534113	1.91312e+07
Ipp	1.04896e-05	-0.557876	0.557876	0.0321299	0.0472985	0.0482358	0.0707269	8.43053e-05	18940640
Eme2	0.00011172	-0.557699	0.557699	0.0181573	0.0267261	0.0261277	0.0412574	0.000683478	19008733
Gm16838	0.0815894	-0.556946	0.556946	0.00385567	0.00567228	0.00625279	0.0095776	0.177977	19115370
Stap2	0.320741	-0.556717	0.556717	0.00608946	0.0089571	0.0109424	0.0132613	0.481896	19124301
Rasl11a	5.32039e-18	-0.555627	0.555627	0.155158	0.228052	0.153193	0.227407	2.58153e-16	18473122
Gm4707	0.0522304	-0.55556	0.55556	0.00568321	0.00835283	0.0107191	0.0154715	0.125439	19102302
Pakap	2.83895e-13	-0.555386	0.555386	0.116137	0.170671	0.143144	0.202358	8.20388e-12	18599267
Nfe2l3	8.32959e-15	-0.554476	0.554476	0.123496	0.18137	0.135328	0.198428	2.90233e-13	18573197
Col4a6	1.21302e-11	-0.55447	0.55447	0.0719258	0.105632	0.0783832	0.123527	2.80619e-10	1.87437e+07
Grip2	0.00202482	-0.554464	0.554464	0.0107671	0.0158128	0.0140688	0.0230845	0.00847879	19063867
H2-Oa	0.320493	-0.554298	0.554298	0.00180841	0.00265557	0.00290308	0.00417485	0.481889	1.91341e+07
Adam30	0.0329746	-0.554066	0.554066	0.00871035	0.0127887	0.0127289	0.0184185	0.086559	1.90938e+07
4930470G03Rik	0.101915	-0.553832	0.553832	0.00482616	0.00708471	0.00602948	0.00908644	0.20993	1.91179e+07
Spi1	0.24079	-0.553671	0.553671	0.011386	0.0167125	0.0140688	0.0171906	0.395264	19117028
Gm12992	0.040151	-0.553231	0.553231	0.0086295	0.0126626	0.0125056	0.0179273	0.101617	19096295
Gm26520	0.354956	-0.553	0.553	0.00102113	0.00149813	0.0015632	0.0024558	0.518915	19137553
Ccdc162	0.104664	-0.552908	0.552908	0.00215198	0.00315704	0.0031264	0.00540275	0.214004	19124944
1810041H14Rik	0.444973	-0.552711	0.552711	0.00299028	0.00438626	0.00647611	0.00785855	0.606453	19132996
9630013D21Rik	0.238206	-0.551689	0.551689	0.00655029	0.00960142	0.0131755	0.0162083	0.392125	19117737
BC018473	0.0800447	-0.551505	0.551505	0.00460562	0.00675006	0.00602948	0.00933202	0.175385	19115670
St8sia4	3.89829e-10	-0.551224	0.551224	0.0852966	0.124988	0.0931219	0.136051	7.12121e-09	18752715
Gm10401	0.235229	-0.550927	0.550927	0.00201697	0.00295491	0.00267977	0.00417485	0.388632	19132063
Cyth4	0.322441	-0.550728	0.550728	0.00716372	0.0104936	0.0109424	0.0132613	0.483248	19124376
Gm20721	9.66752e-08	-0.5503	0.5503	0.0425165	0.0622608	0.0511389	0.0800589	1.17862e-06	18886091
Rdh9	0.792049	-0.550152	0.550152	0.0022195	0.00324988	0.00334971	0.00368369	0.876799	1.91426e+07
Arl5c	5.03993e-05	-0.550064	0.550064	0.0336196	0.0492242	0.050469	0.0712181	0.000338944	18954972
Gm14325	1.77791e-10	-0.549944	0.549944	0.0566786	0.082979	0.0794998	0.121316	3.44474e-09	18768129
Eno1b	6.49114e-15	-0.549681	0.549681	0.109508	0.160293	0.127066	0.190079	2.2948e-13	18583032
Uprt	0.000636278	-0.54959	0.54959	0.0210536	0.0308156	0.0288075	0.0424853	0.00313766	1.90212e+07
Hist1h2bg	0.007088	-0.549353	0.549353	0.0138275	0.0202356	0.0218848	0.0311886	0.0245356	19060579
Vmn2r29	0.0283058	-0.549137	0.549137	0.00756245	0.0110655	0.00915587	0.0142436	0.0766439	19099367
Parpbp	0.0017931	-0.548333	0.548333	0.0192033	0.0280829	0.0343904	0.0476424	0.00764074	19023835
Dok3	0.0260903	-0.546714	0.546714	0.00835904	0.0122105	0.0122823	0.0181729	0.0717462	19092139
Atp8b3	0.251824	-0.546665	0.546665	0.00133847	0.00195511	0.0015632	0.00270138	0.40749	1.91353e+07
Tinagl1	0.0196981	-0.545629	0.545629	0.0140135	0.0204549	0.0203216	0.0279961	0.057013	19075247
Adgrf5	0.000128685	-0.545179	0.545179	0.0388857	0.0567421	0.0453327	0.0640963	0.000773298	18974336
Trpc4	0.000116996	-0.544312	0.544312	0.0247902	0.0361522	0.0283609	0.0439587	0.0007119	19004367
Zfp418	0.0309249	-0.544248	0.544248	0.0128184	0.0186925	0.0178651	0.024558	0.0822365	19084517
Samsn1	0.530562	-0.543516	0.543516	0.00370457	0.00539949	0.00558285	0.00663065	0.679423	1.91361e+07
Gm42726	1.3292e-06	-0.543364	0.543364	0.0360557	0.0525464	0.0410898	0.064833	1.29509e-05	18932860
Pacsin1	0.423316	-0.542928	0.542928	0.00683192	0.0099536	0.011389	0.0132613	0.586711	1.91283e+07
Fabp7	1.10097e-06	-0.542912	0.542912	0.0559749	0.0815504	0.0460027	0.0709725	1.09476e-05	18920877
Gm16677	0.281138	-0.54127	0.54127	0.00122889	0.00178834	0.00200983	0.00319253	0.439511	1.91349e+07
Cep295nl	0.0739212	-0.541048	0.541048	0.00456299	0.00663929	0.00736936	0.0110511	0.164578	1.91121e+07
Kyat3	3.00808e-06	-0.539525	0.539525	0.0349889	0.0508561	0.0433229	0.0665521	2.71673e-05	1.89365e+07
5430402O13Rik	0.00970288	-0.539213	0.539213	0.0115969	0.0168523	0.0154087	0.0230845	0.0318366	19075857
Tmem254a	0.0184973	-0.537535	0.537535	0.0118487	0.0171982	0.0158553	0.0228389	0.0542055	19081896
Zmynd10	0.862358	-0.537511	0.537511	0.00120757	0.00175274	0.00290308	0.00270138	0.920581	1.91475e+07
4831440D22Rik	0.6539	-0.53714	0.53714	0.00162546	0.00235869	0.00334971	0.00392927	0.780219	19140368
Tbc1d30	0.0145783	-0.535817	0.535817	0.00659121	0.00955568	0.0096025	0.0154715	0.0446418	1.90923e+07
Atp8b5	0.660043	-0.535075	0.535075	0.00109803	0.00159107	0.00178651	0.00221022	0.781358	19141820
Ppp1r3e	0.0128709	-0.534982	0.534982	0.00873306	0.0126535	0.0140688	0.0211198	0.0403025	19081424
Gdap1	0.116945	-0.534968	0.534968	0.00322687	0.00467545	0.00357302	0.00589391	0.233147	19124567
AC132444.6	0.499595	-0.534139	0.534139	0.00130964	0.00189646	0.00178651	0.0024558	0.65456	19139579
1700007J10Rik	0.354956	-0.533982	0.533982	0.00107161	0.0015516	0.0015632	0.0024558	0.518915	19137553
Lrp2bp	0.0454227	-0.533791	0.533791	0.00574246	0.00831352	0.00915587	0.0137525	0.11211	19103853
Hbb-bs	1.78576e-182	-0.533701	0.533701	1.19688	1.73266	0.759937	0.958497	5.04e-179	1.58671e+07
Tpd52	4.83117e-14	-0.533517	0.533517	0.141846	0.205315	0.171282	0.23502	1.54945e-12	18543643
Gla	1.28425e-05	-0.533236	0.533236	0.0428506	0.0620122	0.0605181	0.084725	0.000101482	18922762
Tagap	0.631609	-0.533074	0.533074	0.000911982	0.00131965	0.00245645	0.00196464	0.763104	19150147
Fer	1.01622e-28	-0.533069	0.533069	0.236976	0.342906	0.278696	0.394646	1.05575e-26	1.80819e+07
Fam162b	0.000548402	-0.532823	0.532823	0.0318677	0.0461049	0.0408665	0.0569745	0.0027516	18998997
Egfr	6.51267e-06	-0.532691	0.532691	0.0720452	0.104222	0.0904422	0.119352	5.44082e-05	1.88731e+07
BC035044	0.520136	-0.532374	0.532374	0.00161347	0.00233357	0.00245645	0.00319253	0.671903	1.9139e+07
Sapcd1	0.0704995	-0.532231	0.532231	0.00838279	0.0121229	0.012059	0.0166994	0.15865	19103336
Tas1r3	0.105816	-0.532055	0.532055	0.00116312	0.00168185	0.00133988	0.00294695	0.215579	19131053
Lrrc32	0.000160262	-0.531536	0.531536	0.0227958	0.0329505	0.0317106	0.0476424	0.000936465	19000847
Krt222	0.0223414	-0.531329	0.531329	0.0127801	0.0184706	0.0189817	0.026277	0.0631391	1.90789e+07
Catsper2	0.00405917	-0.530595	0.530595	0.0189404	0.0273599	0.0285842	0.0397839	0.0153836	19042970
Khdrbs3	8.43306e-37	-0.530063	0.530063	0.468186	0.676056	0.381867	0.508104	1.28654e-34	17832671
AI838599	0.344612	-0.529355	0.529355	0.00288692	0.00416664	0.00379634	0.00515717	0.508243	1.91333e+07
Ighm	0.000331236	-0.529339	0.529339	0.0200411	0.0289246	0.0178651	0.0297151	0.00176499	1.90383e+07
Gm10143	0.954251	-0.528782	0.528782	0.00141294	0.00203847	0.0031264	0.00319253	0.976333	19145053
Csf3r	0.259198	-0.528328	0.528328	0.00263582	0.00380153	0.00334971	0.00491159	0.416122	19131465
Gm20594	0.276272	-0.528189	0.528189	0.00317477	0.00457839	0.00401965	0.00564833	0.433828	19130839
Igf1	1.10116e-30	-0.527561	0.527561	0.535188	0.771468	0.331845	0.453831	1.25994e-28	17991634
Gm47204	0.00118394	-0.527218	0.527218	0.0126552	0.0182381	0.0185351	0.029224	0.00536495	1.90484e+07
Zfpm2	1.8332e-12	-0.526997	0.526997	0.08623	0.124251	0.108531	0.161346	4.73222e-11	1.86706e+07
Klhl32	0.0062461	-0.526641	0.526641	0.0110963	0.015985	0.0154087	0.0235756	0.022091	19071409
3110045C21Rik	0.268294	-0.526575	0.526575	0.00480619	0.00692335	0.00848593	0.0108055	0.425242	19124387
Pla2g4e	0.022262	-0.526561	0.526561	0.0101938	0.0146841	0.0129522	0.0191552	0.0629568	19089221
Tunar	5.59171e-08	-0.52647	0.52647	0.0589076	0.0848505	0.0721304	0.105845	7.15721e-07	1.88412e+07
9430065F17Rik	0.00608667	-0.526432	0.526432	0.0157519	0.0226884	0.0221081	0.0316798	0.0216038	1.90584e+07
Gm26759	0.00169932	-0.526432	0.526432	0.0188674	0.0271758	0.023448	0.0348723	0.00730178	1.90419e+07
Slc17a9	0.00302068	-0.526339	0.526339	0.0244106	0.0351579	0.0339437	0.0464145	0.0119963	19031080
Rnf165	0.0268168	-0.526086	0.526086	0.00574811	0.00827737	0.00870925	0.0137525	0.0733983	19099864
Ppp2r2b	1.6672e-19	-0.525643	0.525643	0.191199	0.275246	0.183117	0.267436	9.10719e-18	18395075
Lyl1	0.0304298	-0.525424	0.525424	0.0101056	0.0145456	0.0142921	0.0203831	0.0812388	19090136
D830035M03Rik	0.15081	-0.524943	0.524943	0.00873758	0.0125723	0.0140688	0.0179273	0.281786	1.91102e+07
Drp2	5.25284e-11	-0.523911	0.523911	0.0657943	0.0946022	0.0870925	0.132367	1.11608e-09	18741513
Rpgrip1l	1.83289e-14	-0.523711	0.523711	0.106881	0.153658	0.136891	0.199902	6.16382e-13	1.85785e+07
Pde8a	4.57809e-08	-0.523298	0.523298	0.0642233	0.0923042	0.0844127	0.119843	5.94064e-07	18819415
Erlin1	1.93722e-09	-0.523033	0.523033	0.0611471	0.0878667	0.0899955	0.130648	3.17262e-08	18774977
Gm16867	0.00367866	-0.522292	0.522292	0.00467511	0.00671455	0.00826262	0.0149804	0.0141546	1.90846e+07
Serac1	0.00887073	-0.522228	0.522228	0.010373	0.0148974	0.0145154	0.0221022	0.0295354	19076750
Akap12	1.535e-50	-0.521493	0.521493	0.626644	0.89951	0.445735	0.594057	3.56077e-48	17540721
Angptl6	0.00249303	-0.521199	0.521199	0.0168213	0.024141	0.0265744	0.0380648	0.0101728	1.90405e+07
Nos1ap	1.22981e-10	-0.519817	0.519817	0.0777238	0.111438	0.0931219	0.138507	2.44146e-09	18739736
Pdlim5	6.33349e-28	-0.519727	0.519727	0.273082	0.391512	0.269093	0.38335	6.27201e-26	18108151
Cdh15	0.0118539	-0.519233	0.519233	0.00812207	0.0116405	0.00982582	0.0159627	0.0376613	19089948
1700030J22Rik	0.0546408	-0.519032	0.519032	0.00773154	0.0110793	0.011389	0.0162083	0.129956	19101608
Gm11808	5.33329e-107	-0.51828	0.51828	0.76869	1.10095	0.643591	0.790029	4.75337e-104	16670791
Ggh	1.93661e-39	-0.518157	0.518157	0.33772	0.483657	0.359759	0.505648	3.21515e-37	17794251
Olfr78	0.661115	-0.517751	0.517751	0.00156436	0.00223972	0.00200983	0.0024558	0.781358	19141613
Lsmem1	0.90109	-0.517335	0.517335	0.00214006	0.00306308	0.00535954	0.00515717	0.945243	19147465
2610306M01Rik	5.03069e-09	-0.517136	0.517136	0.0519308	0.0743188	0.0692273	0.105599	7.77279e-08	18820704
Dner	0.0175084	-0.516749	0.516749	0.0127902	0.0182993	0.0176418	0.0250491	0.0518698	19078160
Napsa	0.838452	-0.51666	0.51666	0.00475101	0.00679698	0.00580616	0.00613949	0.907176	19142589
Fam83f	0.650842	-0.516591	0.516591	0.00194874	0.00278781	0.00379634	0.00442043	0.777887	19139983
Adgrg6	0.000497888	-0.515941	0.515941	0.101889	0.145694	0.100715	0.122299	0.00253038	18929246
Zfp273	1.85961e-05	-0.515763	0.515763	0.0215007	0.0307406	0.0261277	0.043222	0.000141087	1.89919e+07
Spdl1	0.0866227	-0.515556	0.515556	0.020899	0.029876	0.0355069	0.0424853	0.186198	1.90803e+07
Trim16	0.00591105	-0.515231	0.515231	0.0166614	0.0238128	0.0288075	0.0395383	0.0210789	19047290
Scimp	0.555297	-0.51513	0.51513	0.00082852	0.00118406	0.00200983	0.00147348	0.69893	19150563
Sox17	0.434357	-0.515109	0.515109	0.00323565	0.00462407	0.00401965	0.00515717	0.5964	19135288
Tnnt1	0.000939278	-0.514955	0.514955	0.0240666	0.0343899	0.034837	0.0491159	0.00440115	19015179
Nuak2	0.805877	-0.514814	0.514814	0.00140761	0.0020112	0.00401965	0.00368369	0.886669	19148698
Adgrl3	4.5669e-23	-0.514519	0.514519	0.211467	0.302085	0.217061	0.312623	3.46798e-21	1.82731e+07
Tlr13	0.293519	-0.514327	0.514327	0.00157544	0.00225024	0.00223314	0.00343811	0.453095	19134716
Nav3	6.47093e-10	-0.513476	0.513476	0.1265	0.180577	0.108977	0.154224	1.14145e-08	18733402
Gm10614	0.0200646	-0.513423	0.513423	0.00531197	0.00758248	0.00714605	0.0120334	0.0579079	19101218
Ppl	0.570491	-0.513317	0.513317	0.00486106	0.00693833	0.00848593	0.00736739	0.712314	19155639
Catsperd	0.415116	-0.512996	0.512996	0.00233314	0.00332941	0.00290308	0.00392927	0.579042	19136334
E130018N17Rik	0.408518	-0.512945	0.512945	0.00178042	0.00254059	0.00267977	0.00368369	0.572859	19136533
Tagln	5.00141e-14	-0.512888	0.512888	0.293791	0.419211	0.158776	0.222004	1.59499e-12	18559372
Snx30	6.76416e-10	-0.512682	0.512682	0.0948062	0.13526	0.125949	0.172642	1.18699e-08	18710927
Lrrn1	4.24856e-09	-0.512157	0.512157	0.0848864	0.121063	0.0937919	0.134332	6.65542e-08	18777489
Gucy1b1	8.51903e-13	-0.511532	0.511532	0.131275	0.187141	0.150514	0.209725	2.28986e-11	18601177
Gm26575	0.515234	-0.51147	0.51147	0.00161433	0.00230123	0.00223314	0.00294695	0.668427	19139180
Ptpn3	4.89947e-05	-0.511113	0.511113	0.0317278	0.0452169	0.0453327	0.0653242	0.000330549	18963058
Mgarp	7.36019e-05	-0.51109	0.51109	0.024618	0.0350838	0.0319339	0.0488703	0.000472291	18992269
Dtna	2.04209e-15	-0.510715	0.510715	0.132062	0.188156	0.138455	0.20555	7.75353e-14	18552934
A330035P11Rik	0.000763454	-0.510678	0.510678	0.0144669	0.0206113	0.0183117	0.0294695	0.00367805	19044753
Ctsw	0.955689	-0.510465	0.510465	0.00250194	0.00356404	0.0031264	0.00319253	0.976978	19145073
Gm45894	0.373949	-0.510455	0.510455	0.00384906	0.00548298	0.00647611	0.00810413	0.537701	1.91308e+07
1700040L08Rik	0.203631	-0.510185	0.510185	0.00161017	0.00229326	0.00200983	0.00343811	0.350365	19132688
Cyb5r4	3.01937e-12	-0.509674	0.509674	0.110218	0.15692	0.153193	0.210953	7.52439e-11	1.86122e+07
Dnajb3	0.00510253	-0.508834	0.508834	0.0215381	0.0306466	0.0350603	0.0469057	0.018602	19036402
Ak5	0.120005	-0.508577	0.508577	0.00635373	0.00903911	0.0116123	0.0154715	0.23768	1.91103e+07
Fam171b	7.83368e-17	-0.508351	0.508351	0.171772	0.244332	0.19004	0.266208	3.33305e-15	18449635
S1pr4	0.489507	-0.50829	0.50829	0.000870607	0.00123832	0.0015632	0.00221022	0.645887	1.91398e+07
Ptprcap	0.0182604	-0.508263	0.508263	0.00737533	0.0104902	0.00669942	0.0115422	0.0536564	19101664
Gm11335	0.800017	-0.507989	0.507989	0.00141037	0.00200564	0.0031264	0.00343811	0.882444	19142831
Emcn	0.00282893	-0.507663	0.507663	0.0107876	0.0153373	0.0104958	0.0181729	0.0113546	19076057
Fam98a	2.32569e-15	-0.507327	0.507327	0.129797	0.184495	0.174408	0.244352	8.71312e-14	1.85054e+07
Kbtbd11	2.8577e-19	-0.507123	0.507123	0.179076	0.254505	0.200536	0.287083	1.53626e-17	1.83774e+07
Gm47962	0.381667	-0.506666	0.506666	0.00124849	0.0017738	0.00200983	0.00294695	0.54454	19137139
Gm15420	0.120642	-0.506251	0.506251	0.00585881	0.00832158	0.00781599	0.0110511	0.238691	1.91162e+07
Cnnm4	1.30664e-14	-0.505331	0.505331	0.149021	0.211528	0.15833	0.225196	4.47004e-13	18544254
Gm11630	0.50851	-0.505225	0.505225	0.00129287	0.00183503	0.00200983	0.00270138	0.662551	1.91394e+07
Gm47232	0.364199	-0.504848	0.504848	0.00341221	0.00484183	0.00513622	0.00663065	0.528569	1.9132e+07
St6gal2	1.38271e-05	-0.504726	0.504726	0.0294714	0.0418157	0.0357302	0.055501	0.000108603	18967448
Rgs22	0.0170559	-0.504028	0.504028	0.0155385	0.0220363	0.0207682	0.0287328	0.0508226	1.90728e+07
Neurl2	6.32375e-07	-0.503734	0.503734	0.0384343	0.0544952	0.0531487	0.0803045	6.61027e-06	18901188
Cdkn1c	1.5978e-68	-0.503433	0.503433	0.930172	1.3186	0.570344	0.738212	6.29235e-66	17194693
Eya4	7.11274e-05	-0.503327	0.503327	0.0355055	0.0503283	0.0491291	0.0692534	0.000458148	18961195
Gm29539	0.918186	-0.503313	0.503313	0.00132268	0.00187485	0.00379634	0.00392927	0.955664	19144431
1700096K18Rik	5.05965e-07	-0.503102	0.503102	0.0474202	0.0672066	0.0658776	0.095776	5.42623e-06	1.88761e+07
C130074G19Rik	0.863907	-0.502834	0.502834	0.00532715	0.00754855	0.0080393	0.00834971	0.921595	19142639
Fmnl1	0.611833	-0.50149	0.50149	0.0039719	0.00562292	0.00669942	0.00761297	0.748362	19137256
Ydjc	0.000144725	-0.501314	0.501314	0.0279683	0.0395891	0.0433229	0.0616405	0.000857215	18978964
Wnt10b	0.0643307	-0.501195	0.501195	0.00815415	0.0115413	0.0138455	0.0189096	0.147973	19099498
2010300C02Rik	0.0948647	-0.501138	0.501138	0.00397562	0.00562682	0.00759268	0.0110511	0.198991	19114136
Setd4	0.000157119	-0.500876	0.500876	0.033482	0.0473795	0.0471192	0.0658153	0.000920642	18973989
Vwf	0.503311	-0.500131	0.500131	0.00716771	0.0101376	0.0096025	0.0110511	0.657644	1.91324e+07
Slc16a11	0.508107	-0.499987	0.499987	0.00135993	0.00192322	0.00200983	0.00270138	0.662174	1.91394e+07
Vps25	7.79298e-05	-0.499789	0.499789	0.0413335	0.0584459	0.0623046	0.0842338	0.000496861	18942911
Btn2a2	0.215582	-0.499787	0.499787	0.00213653	0.00302107	0.00223314	0.00368369	0.36514	19132487
A330094K24Rik	0.215235	-0.499694	0.499694	0.00162942	0.00230386	0.00223314	0.00368369	0.364685	19132477
Echdc1	4.99886e-09	-0.499529	0.499529	0.0744429	0.105244	0.100938	0.142436	7.73066e-08	18768556
Akr1c14	0.0217633	-0.499487	0.499487	0.00461093	0.00651852	0.00513622	0.00933202	0.0618978	19107561
Wdr93	0.132987	-0.499081	0.499081	0.00172935	0.00244412	0.00178651	0.00343811	0.25674	19130661
Vpreb3	0.149343	-0.498781	0.498781	0.0101602	0.0143565	0.00781599	0.0108055	0.279754	19118451
Stat4	0.161722	-0.498727	0.498727	0.00288782	0.00408039	0.00379634	0.00589391	0.295615	19126603
1810009A15Rik	4.55273e-05	-0.49872	0.49872	0.0232262	0.0328177	0.0388566	0.0577112	0.00031037	18973809
Sesn1	1.78675e-20	-0.498486	0.498486	0.204297	0.288616	0.232693	0.324902	1.05425e-18	1.83123e+07
Adamtsl4	2.52433e-06	-0.49823	0.49823	0.0310329	0.0438333	0.0381867	0.0604126	2.33081e-05	1.89455e+07
Proca1	1.27754e-10	-0.498213	0.498213	0.0513777	0.0725692	0.061858	0.100933	2.52732e-09	1.88e+07
Cp	0.00715608	-0.496763	0.496763	0.0306043	0.043184	0.0294774	0.0400295	0.0247409	19048752
Gm3055	0.0834633	-0.496639	0.496639	0.00662935	0.00935351	0.00848593	0.012279	0.180923	19111196
1700016J18Rik	0.443805	-0.495956	0.495956	0.00491532	0.00693185	0.00736936	0.00884086	0.605591	19132161
F3	2.67392e-08	-0.495682	0.495682	0.0645713	0.0910447	0.0757034	0.111248	3.62532e-07	18826847
Ankmy1	0.013057	-0.495563	0.495563	0.014263	0.020109	0.0218848	0.0304519	0.0407872	1.90677e+07
Gm31356	0.00682158	-0.495266	0.495266	0.0119398	0.0168302	0.0140688	0.0218566	0.0237542	19075101
Pawr	1.72075e-11	-0.495192	0.495192	0.0878065	0.123764	0.11657	0.168222	3.89561e-10	1.86814e+07
Tmppe	0.814821	-0.495013	0.495013	0.00162094	0.00228445	0.00267977	0.00294695	0.892152	19143242
Derl3	0.766032	-0.49449	0.49449	0.00234508	0.0033038	0.00424297	0.00466601	0.859813	1.91418e+07
Gucy1a2	4.81792e-05	-0.494218	0.494218	0.035728	0.050325	0.0430996	0.0628684	0.000325861	18966609
Olfr1423	0.380591	-0.493856	0.493856	0.00651079	0.00916852	0.00870925	0.0105599	0.543913	1.91288e+07
Psors1c2	0.983309	-0.49376	0.49376	0.00112606	0.00158561	0.00223314	0.00221022	0.99113	19145884
Tnfaip8l2	0.595661	-0.49354	0.49354	0.00512591	0.00721674	0.0080393	0.00908644	0.734556	19136049
Zfp69	0.0439657	-0.493374	0.493374	0.0093292	0.013133	0.0138455	0.0194008	0.109375	19095035
Tead4	0.238429	-0.492285	0.492285	0.00282826	0.00397843	0.00513622	0.00712181	0.392338	1.91276e+07
Myzap	0.205528	-0.491614	0.491614	0.0124575	0.0175154	0.0185351	0.0223477	0.352554	1.91104e+07
Mamld1	0.00115154	-0.491569	0.491569	0.0206344	0.0290113	0.0256811	0.0380648	0.00523775	19033436
Ogfrl1	6.60753e-11	-0.489997	0.489997	0.111506	0.156604	0.137338	0.189342	1.36955e-09	18668112
Tmigd3	0.533111	-0.489788	0.489788	0.00167026	0.00234544	0.00379634	0.00466601	0.681137	1.91377e+07
Zfp879	0.0342565	-0.489754	0.489754	0.0116119	0.0163055	0.0160786	0.0223477	0.0892872	19088526
Gm33195	0.028442	-0.489699	0.489699	0.00825417	0.0115901	0.0109424	0.0164538	0.0769143	1.90956e+07
Gm8113	0.046077	-0.489658	0.489658	0.0127136	0.0178513	0.0187584	0.0250491	0.113358	19088233
Gm8797	8.55498e-12	-0.489546	0.489546	0.0895491	0.125727	0.11858	0.171415	2.00964e-10	18670778
Hist1h3c	0.116959	-0.489525	0.489525	0.0298074	0.0418491	0.0361769	0.0424853	0.233147	19085619
Cd209f	0.257295	-0.489406	0.489406	0.00655715	0.00920537	0.00669942	0.00884086	0.414207	19126114
Gmfg	0.0783308	-0.489148	0.489148	0.0174277	0.0244618	0.0218848	0.0277505	0.172699	19091759
Trim36	0.0306584	-0.48888	0.48888	0.00735579	0.0103228	0.0096025	0.0147348	0.0816818	19099131
1700023H06Rik	0.534773	-0.488614	0.488614	0.00218864	0.00307087	0.00424297	0.00515717	0.682173	1.91373e+07
Gm50012	0.0561122	-0.488256	0.488256	0.0104545	0.014665	0.014962	0.0203831	0.132897	1.90962e+07
Gm26810	0.6586	-0.48822	0.48822	0.00208593	0.00292596	0.00290308	0.00343811	0.781358	19140794
Rpl36a-ps1	1.92974e-26	-0.487743	0.487743	0.304103	0.426428	0.324699	0.431483	1.7109e-24	18090730
Fabp4	0.00899267	-0.487733	0.487733	0.0124333	0.0174345	0.00848593	0.0144892	0.0298698	19091064
Chad	0.0922746	-0.487541	0.487541	0.00297119	0.00416576	0.00267977	0.00491159	0.194617	19125392
Ltbp4	0.000257556	-0.486993	0.486993	0.109595	0.1536	0.11858	0.142682	0.00142345	1.89022e+07
Syt7	0.154439	-0.486525	0.486525	0.0116949	0.0163853	0.0160786	0.0201375	0.286763	19108295
Ehd4	4.09001e-19	-0.486495	0.486495	0.215933	0.30253	0.238723	0.325884	2.13766e-17	1.83392e+07
Gpat3	0.00020315	-0.486229	0.486229	0.0332339	0.0465534	0.0455561	0.0638507	0.00115596	18979433
Gm50399	0.53561	-0.48574	0.48574	0.00222207	0.00311158	0.00401965	0.00491159	0.682778	19137553
1700066J03Rik	0.0921945	-0.485658	0.485658	0.00258531	0.00362002	0.00267977	0.00491159	0.194544	19125387
Zfp97	0.0170057	-0.485557	0.485557	0.0140077	0.0196126	0.0205449	0.0284872	0.0506909	19073087
Selenbp1	2.47844e-14	-0.48547	0.48547	0.151494	0.212097	0.165476	0.233301	8.22939e-13	18541340
Kitl	0.00185796	-0.485106	0.485106	0.0689494	0.0965077	0.0837427	0.102161	0.00788341	18967378
Gm49886	0.0911785	-0.485077	0.485077	0.00149338	0.00209022	0.00178651	0.00368369	0.193192	19128414
Gm47772	0.661503	-0.484966	0.484966	0.000944543	0.00132194	0.00245645	0.00294695	0.781358	19141211
Aff2	3.45239e-11	-0.484939	0.484939	0.075805	0.106091	0.0908888	0.13777	7.52417e-10	18730186
Fbll1	0.414916	-0.484594	0.484594	0.00194463	0.00272092	0.00290308	0.00392927	0.578907	19136330
Kank4	9.13388e-05	-0.484582	0.484582	0.0325442	0.0455353	0.0381867	0.0562377	0.000571593	18982500
Kbtbd8	0.120869	-0.484108	0.484108	0.00480114	0.00671546	0.00781599	0.0110511	0.239021	1.91162e+07
Scube2	0.0262301	-0.483944	0.483944	0.0193874	0.0271145	0.0308173	0.0395383	0.0720369	19065051
Olfm3	0.420493	-0.483648	0.483648	0.00270875	0.00378758	0.0031264	0.00417485	0.583754	19136129
Fzd4	0.0833169	-0.483519	0.483519	0.0120061	0.0167864	0.0165252	0.021611	0.180676	19099070
Gm20705	0.529755	-0.482924	0.482924	0.00333244	0.00465733	0.00580616	0.00687623	0.678908	19135860
Flvcr2	1.5552e-06	-0.482783	0.482783	0.0375627	0.0524915	0.0453327	0.0699902	1.4955e-05	18925526
Egfem1	9.45733e-09	-0.48274	0.48274	0.0529768	0.0740295	0.0569451	0.0903733	1.39747e-07	1.88508e+07
Ptgis	4.67495e-36	-0.481855	0.481855	0.469734	0.656002	0.391023	0.520383	6.65257e-34	1.7839e+07
Pcyt1b	0.00109796	-0.481753	0.481753	0.0311814	0.0435429	0.0395266	0.0545187	0.00502916	1.90097e+07
Cep72	2.76707e-05	-0.481735	0.481735	0.0325773	0.0454917	0.0482358	0.069499	0.000199904	1.89516e+07
Cbs	0.270936	-0.481643	0.481643	0.00248862	0.00347495	0.00379634	0.00540275	0.427988	19131042
1700012C14Rik	0.0595437	-0.48117	0.48117	0.00857427	0.0119686	0.0125056	0.0174361	0.139174	19100687
Plcl1	1.20383e-05	-0.481074	0.481074	0.0354033	0.0494153	0.0428763	0.0643418	9.55281e-05	18951822
Cmah	0.77325	-0.480777	0.480777	0.00267981	0.00373965	0.00401965	0.00442043	0.865047	19142005
Gm13589	0.337628	-0.480624	0.480624	0.00121299	0.00169254	0.00133988	0.00221022	0.500472	19137766
Adamts4	2.58428e-08	-0.480477	0.480477	0.061628	0.0859838	0.081063	0.117387	3.52069e-07	1.88178e+07
Tmem150c	0.800086	-0.480356	0.480356	0.00174966	0.00244092	0.0031264	0.00343811	0.882444	19142832
Gm15743	0.140746	-0.480152	0.480152	0.00325143	0.00453538	0.00468959	0.00712181	0.267286	1.91235e+07
Map3k15	0.303964	-0.480139	0.480139	0.00172338	0.0024039	0.00245645	0.00368369	0.464058	1.91345e+07
Rin3	0.00368446	-0.479845	0.479845	0.0268111	0.0373907	0.03841	0.0513261	0.0141608	1.90273e+07
Gm14488	0.377824	-0.47957	0.47957	0.00443998	0.00619079	0.00714605	0.00884086	0.541384	19130222
Susd2	0.0928359	-0.479549	0.479549	0.00369479	0.00515167	0.00535954	0.00834971	0.195508	19118452
Nebl	4.39003e-10	-0.479222	0.479222	0.101991	0.142175	0.107637	0.153978	7.94238e-09	1.87305e+07
Wdr63	0.097797	-0.478941	0.478941	0.00514047	0.00716437	0.00781599	0.0112967	0.203827	19114023
Efcc1	0.00222553	-0.478772	0.478772	0.0133389	0.0185886	0.0218848	0.0326621	0.00921445	19047775
3110009F21Rik	0.000308641	-0.478522	0.478522	0.0221105	0.030807	0.0245645	0.0383104	0.00166133	19021994
din	4.59813e-22	-0.478418	0.478418	0.162441	0.226315	0.197633	0.293713	3.1271e-20	18316902
Gm32817	0.0459641	-0.478347	0.478347	0.00518108	0.007218	0.00736936	0.0115422	0.113166	1.91078e+07
Cryzl2	5.29071e-07	-0.478004	0.478004	0.0526831	0.0733778	0.0750335	0.106336	5.63832e-06	18861967
Dnaaf3	0.0515521	-0.477919	0.477919	0.0121775	0.01696	0.0176418	0.0235756	0.124038	19091259
9430060I03Rik	0.00157109	-0.477685	0.477685	0.0182191	0.0253702	0.0247879	0.0365914	0.00684809	1.90385e+07
Gm37065	0.174614	-0.477628	0.477628	0.00226281	0.00315086	0.00267977	0.00442043	0.313348	19129840
Gm31152	0.500157	-0.477523	0.477523	0.00138867	0.00193352	0.00178651	0.0024558	0.654989	19139587
A030001D20Rik	3.82092e-05	-0.476971	0.476971	0.027456	0.0382138	0.0410898	0.0606582	0.000265832	18967724
Tspan33	0.0400736	-0.47574	0.47574	0.0131352	0.0182662	0.0194283	0.0260314	0.101497	19085476
4930417H01Rik	0.442114	-0.475661	0.475661	0.003507	0.00487668	0.00491291	0.00613949	0.604111	19134468
Gm2449	0.33421	-0.475648	0.475648	0.00241274	0.00335502	0.00334971	0.00466601	0.496492	1.91337e+07
0610010F05Rik	1.67716e-07	-0.475117	0.475117	0.0511965	0.0711647	0.0703439	0.102407	1.96005e-06	1.88563e+07
Sorcs3	0.0274964	-0.474814	0.474814	0.0110812	0.0154	0.0127289	0.018664	0.0748833	19091828
Vmn2r4	0.515363	-0.47457	0.47457	0.0016801	0.00233451	0.00223314	0.00294695	0.668499	19139182
Myo5b	3.17587e-17	-0.474412	0.474412	0.193792	0.269245	0.165029	0.242878	1.42653e-15	18470853
Qrfp	0.963951	-0.474161	0.474161	0.00103435	0.00143682	0.00200983	0.00196464	0.980974	19146087
Tsga10ip	0.515169	-0.474044	0.474044	0.0012399	0.00172222	0.00223314	0.00294695	0.668396	19139179
Smim5	0.204941	-0.473979	0.473979	0.00234991	0.00326388	0.00357302	0.00540275	0.351797	19129041
Rexo5	0.00637821	-0.473533	0.473533	0.029981	0.0416288	0.0439929	0.0567289	0.0224597	19028200
Jrkl	4.59476e-12	-0.473133	0.473133	0.111186	0.154339	0.144931	0.202358	1.11632e-10	1.86269e+07
Ccl27a	1.83063e-17	-0.473062	0.473062	0.167054	0.231879	0.205672	0.287083	8.4239e-16	1.84147e+07
Gm16153	0.26491	-0.472942	0.472942	0.00255722	0.00354926	0.00357302	0.00515717	0.422504	19131240
Rgs18	0.853237	-0.472809	0.472809	0.00323697	0.00449229	0.00535954	0.00564833	0.914936	19142988
Bmf	2.68017e-08	-0.472019	0.472019	0.0981574	0.136149	0.111657	0.15275	3.63088e-07	1.87737e+07
Tex36	0.661583	-0.471621	0.471621	0.00117719	0.00163238	0.00200983	0.0024558	0.781358	19141619
Slc46a2	0.0126322	-0.471608	0.471608	0.0109694	0.0152108	0.0136222	0.0206287	0.0397167	19082108
Dynlt1c	5.38654e-05	-0.4713	0.4713	0.0427274	0.0592355	0.0687807	0.0920923	0.000358536	1.89293e+07
Pbdc1	7.47031e-27	-0.471298	0.471298	0.263047	0.364677	0.308843	0.420923	6.76483e-25	1.80933e+07
Gm45148	0.0921784	-0.471111	0.471111	0.00191552	0.00265525	0.00267977	0.00491159	0.194535	19125386
Dgat2	0.00095105	-0.471039	0.471039	0.01922	0.026641	0.0254578	0.0380648	0.00445138	19031776
Col5a3	0.00359512	-0.470716	0.470716	0.0527739	0.0731339	0.0428763	0.0564833	0.0139186	19021113
Pcdhgb1	0.0491914	-0.470371	0.470371	0.00682276	0.00945271	0.00781599	0.0120334	0.119376	1.91074e+07
Spo11	0.990288	-0.470299	0.470299	0.00290009	0.00401777	0.00468959	0.00466601	0.994339	1.91459e+07
Gm9747	0.15645	-0.470148	0.470148	0.00422632	0.00585451	0.00558285	0.00810413	0.289432	1.91227e+07
Eepd1	0.0197471	-0.469977	0.469977	0.0103534	0.0143403	0.0198749	0.0275049	0.0571327	19075949
Pacc1	0.00117127	-0.469431	0.469431	0.0208598	0.0288818	0.0314873	0.0449411	0.00531465	1.90233e+07
Vmn2r1	0.659796	-0.469281	0.469281	0.000775711	0.00107391	0.00178651	0.00221022	0.781358	19141817
Gm42997	0.221578	-0.469165	0.469165	0.00248483	0.00343978	0.00424297	0.00613949	0.372344	1.91284e+07
Olfr482	0.009414	-0.469087	0.469087	0.00990231	0.0137071	0.014962	0.0225933	0.0310391	1.90764e+07
Scarf1	0.716263	-0.46884	0.46884	0.00353821	0.00489687	0.00625279	0.00687623	0.823714	19139900
Gstp1	8.42874e-14	-0.46879	0.46879	0.153833	0.212898	0.155427	0.219303	2.57175e-12	18568464
Vcam1	0.000525468	-0.468554	0.468554	0.0472184	0.0653372	0.0587316	0.0773576	0.00265066	18973673
Gm20707	0.000518354	-0.468004	0.468004	0.028265	0.039096	0.0393033	0.0552554	0.00262181	1.90007e+07
Gm29093	0.420299	-0.467951	0.467951	0.00200116	0.00276789	0.0031264	0.00417485	0.583629	19136125
Tmem8b	5.41508e-09	-0.467766	0.467766	0.0624387	0.0863506	0.0761501	0.114194	8.30607e-08	1.88086e+07
Carns1	0.0130887	-0.466659	0.466659	0.0107938	0.014916	0.0160786	0.0235756	0.0408589	1.90777e+07
Ctsc	4.98538e-05	-0.466595	0.466595	0.0830738	0.114795	0.0859759	0.111739	0.000335676	18906891
Strip2	0.445873	-0.466558	0.466558	0.00362946	0.00501522	0.00625279	0.00761297	0.607236	19133229
Mycbpap	0.0530031	-0.46651	0.46651	0.0106335	0.0146929	0.0133988	0.018664	0.126935	19097891
Lrp8	0.118724	-0.466494	0.466494	0.0093797	0.0129604	0.0198749	0.0248035	0.235804	1.91003e+07
Cfap299	0.126306	-0.465717	0.465717	0.00510316	0.00704748	0.00848593	0.0117878	0.247211	19115568
Hist1h2bf	0.014459	-0.465672	0.465672	0.00587479	0.00811285	0.00937919	0.0152259	0.0443729	19092758
Opn3	0.555721	-0.465269	0.465269	0.00619894	0.0085581	0.0107191	0.0120334	0.699403	19133368
Gm15627	0.373885	-0.465252	0.465252	0.00466208	0.00643627	0.00625279	0.00785855	0.537696	19131033
Rbm8a2	0.0275055	-0.465099	0.465099	0.0173612	0.0239657	0.0225547	0.0302063	0.0748959	1.90762e+07
Rhoh	0.206944	-0.464659	0.464659	0.00592474	0.00817609	0.00625279	0.00859528	0.354337	19124379
Mfsd12	4.00473e-06	-0.464608	0.464608	0.0360294	0.0497185	0.0509156	0.0753929	3.52474e-05	18925042
Gas1	7.62987e-32	-0.464491	0.464491	0.435127	0.600402	0.350826	0.48502	9.22888e-30	1.79487e+07
Cdk15	0.0230996	-0.463741	0.463741	0.0116538	0.0160719	0.0194283	0.0267682	0.0648299	19078555
Col4a5	1.47921e-18	-0.463404	0.463404	0.230249	0.317465	0.237829	0.324411	7.43292e-17	18353267
Cdk19os	0.303316	-0.463226	0.463226	0.00184819	0.00254795	0.00245645	0.00368369	0.463402	1.91345e+07
Pwwp3b	3.81017e-06	-0.463027	0.463027	0.0428446	0.0590583	0.0578383	0.0834971	3.36575e-05	18912587
Igfbp5	1.62329e-36	-0.462847	0.462847	1.03323	1.42406	0.406655	0.542976	2.45435e-34	17817431
Pi15	0.00013832	-0.462306	0.462306	0.0342456	0.0471815	0.0321572	0.0486248	0.00082273	18998197
Bivm	1.24176e-07	-0.461634	0.461634	0.0779099	0.10729	0.105181	0.142682	1.48188e-06	18801803
Ptger2	3.12712e-09	-0.46081	0.46081	0.0877552	0.120779	0.0886556	0.129912	5.00044e-08	18781373
Pcdhb6	0.00782521	-0.460477	0.460477	0.0144356	0.0198634	0.0198749	0.0287328	0.0266346	1.90652e+07
Gm20337	0.311749	-0.460093	0.460093	0.00379839	0.00522517	0.00647611	0.00834971	0.472907	19128608
Gm47101	0.000482036	-0.459883	0.459883	0.00643072	0.008845	0.00937919	0.0181729	0.00245783	1.9066e+07
Mapkbp1	1.00905e-11	-0.459543	0.459543	0.0904256	0.124345	0.119696	0.172642	2.34966e-10	1.86708e+07
Tmem47	1.69577e-27	-0.459533	0.459533	0.292951	0.402836	0.310183	0.428291	1.6599e-25	1.80762e+07
Rasgrp1	0.511919	-0.459525	0.459525	0.00633267	0.00870799	0.00848593	0.00982318	0.665656	19133377
Ephb2	4.49129e-05	-0.459264	0.459264	0.0342782	0.0471271	0.0495757	0.0704813	0.000306777	18954935
Dapp1	7.55677e-06	-0.459213	0.459213	0.0481437	0.0661876	0.0719071	0.0989686	6.24226e-05	18899107
Insl6	5.11039e-05	-0.45914	0.45914	0.0266343	0.0366147	0.0386333	0.0574656	0.00034273	18975343
Btc	0.315817	-0.459135	0.459135	0.00563022	0.00773996	0.00714605	0.00908644	0.477291	19127969
Gm20109	0.244065	-0.458978	0.458978	0.00201867	0.0027748	0.00290308	0.00442043	0.39863	19131865
Nfe2	0.320619	-0.458893	0.458893	0.0015266	0.0020983	0.00290308	0.00417485	0.481889	1.91341e+07
Gm27042	0.792247	-0.458619	0.458619	0.00196779	0.00270418	0.00334971	0.00368369	0.876811	1.91426e+07
4933439K11Rik	0.619483	-0.458173	0.458173	0.00516339	0.00709347	0.00625279	0.00712181	0.754157	19137710
Cldn10	3.14625e-34	-0.458134	0.458134	0.786148	1.07998	0.412461	0.541012	4.29666e-32	1.78605e+07
A230065N10Rik	0.0769695	-0.457734	0.457734	0.00497792	0.00683659	0.00580616	0.00908644	0.170113	19115826
Nat8l	0.368424	-0.45763	0.45763	0.00357874	0.00491463	0.00558285	0.00712181	0.532745	1.91316e+07
Hist1h2ac	0.000326153	-0.457507	0.457507	0.0252559	0.0346806	0.0346137	0.0503438	0.0017423	19003156
Gm49472	0.265344	-0.457435	0.457435	0.00576167	0.00791134	0.00759268	0.00982318	0.422902	19125318
A2m	0.207536	-0.457262	0.457262	0.0184342	0.0253089	0.0198749	0.0238212	0.355028	1.91094e+07
4930404H11Rik	0.320827	-0.457053	0.457053	0.00179171	0.00245954	0.00290308	0.00417485	0.481896	1.91341e+07
Col12a1	1.42439e-62	-0.456796	0.456796	0.959083	1.31633	0.577043	0.745825	4.72953e-60	1.72813e+07
Rpgrip1	8.33468e-13	-0.456653	0.456653	0.0893645	0.12264	0.11657	0.172888	2.24744e-11	18648581
Pagr1a	0.270725	-0.456398	0.456398	0.00515292	0.00707039	0.00870925	0.0110511	0.427735	1.91242e+07
Pdia5	4.27779e-18	-0.456332	0.456332	0.155626	0.213526	0.193167	0.275295	2.09971e-16	1.84143e+07
Kdm4d	0.425239	-0.456188	0.456188	0.00205836	0.00282389	0.00334971	0.00442043	0.588943	19135927
Ino80	1.57003e-20	-0.456089	0.456089	0.201517	0.276444	0.239616	0.334234	9.36157e-19	1.83027e+07
6530437J22Rik	0.0614708	-0.456014	0.456014	0.0121501	0.0166669	0.0174185	0.0230845	0.142747	19093846
Napb	0.00408717	-0.455907	0.455907	0.0302631	0.0415102	0.0422063	0.055501	0.0154768	19023810
Prph	0.401081	-0.455782	0.455782	0.00158408	0.0021726	0.00245645	0.00343811	0.564906	19136737
Hook1	7.40733e-10	-0.45576	0.45576	0.093746	0.128573	0.0955784	0.140226	1.28652e-08	18754183
Aldh1a2	0.0410445	-0.455565	0.455565	0.0619405	0.0849402	0.054042	0.0638507	0.103538	19050802
Styxl1	0.660624	-0.455482	0.455482	0.00180884	0.00248035	0.00267977	0.00319253	0.781358	19141008
Gm26670	0.0156704	-0.455419	0.455419	0.0153434	0.0210386	0.0216615	0.0299607	0.0473356	19070307
Aspg	0.50539	-0.455291	0.455291	0.00595229	0.00816094	0.00915587	0.0105599	0.659953	1.91327e+07
Hrct1	0.106487	-0.455178	0.455178	0.00705519	0.00967233	0.00893256	0.0125246	0.216658	1.9113e+07
Zfp951	0.0444187	-0.455065	0.455065	0.0166892	0.0228783	0.0241179	0.0311886	0.110295	19080795
Prss12	2.80197e-05	-0.454533	0.454533	0.0377798	0.0517711	0.0520322	0.074165	0.000201995	18945242
Gm26510	0.263557	-0.453996	0.453996	0.00514362	0.00704588	0.00736936	0.0095776	0.421243	1.91255e+07
Trim24	4.23372e-21	-0.453619	0.453619	0.235922	0.323088	0.26954	0.365668	2.71568e-19	1.82602e+07
Cep83	5.07058e-15	-0.453472	0.453472	0.141868	0.194265	0.183564	0.25442	1.81918e-13	1.85021e+07
Fbxw10	0.0250343	-0.453423	0.453423	0.00883917	0.0121034	0.0118356	0.0176817	0.0692244	19092584
Pik3r3	3.61607e-12	-0.453265	0.453265	0.116357	0.159308	0.147164	0.206041	8.88745e-11	18620734
Gm16759	5.31962e-05	-0.453174	0.453174	0.0374239	0.0512351	0.0446628	0.064833	0.000354516	1.89648e+07
Lvrn	0.0157668	-0.453062	0.453062	0.0109523	0.0149931	0.0160786	0.0233301	0.0475589	19079721
Sh3bgr	0.739691	-0.452838	0.452838	0.00832984	0.0114013	0.0127289	0.0135069	0.841247	1.91382e+07
Ccdc152	0.0106462	-0.452743	0.452743	0.0174828	0.0239276	0.0209915	0.0297151	0.0344512	19066727
Gm42937	6.83363e-05	-0.45269	0.45269	0.0464107	0.0635171	0.0549352	0.0763752	0.000442188	1.89515e+07
Vpreb1	0.105113	-0.452339	0.452339	0.00801167	0.010962	0.0125056	0.0166994	0.214558	19107436
Tubb2a	1.19543e-31	-0.452268	0.452268	0.430682	0.589255	0.404422	0.526768	1.42559e-29	17919243
Ttyh2	5.53562e-05	-0.452084	0.452084	0.0355662	0.048655	0.0480125	0.0685167	0.000367494	1.89599e+07
Gldc	0.660125	-0.452068	0.452068	0.00091072	0.00124586	0.00178651	0.00221022	0.781358	19141821
Sh3gl2	0.00325308	-0.451905	0.451905	0.0234432	0.0320666	0.0337204	0.046169	0.0127723	1.90323e+07
Gpr176	0.00430091	-0.451521	0.451521	0.00937179	0.0128157	0.0127289	0.0206287	0.0161096	19073893
Kif13b	1.5314e-16	-0.451432	0.451432	0.175238	0.23962	0.200759	0.278978	6.41899e-15	18443135
Il33	0.0327947	-0.451414	0.451414	0.00370243	0.00506263	0.00446628	0.00810413	0.0861669	19112610
Dnah11	0.786677	-0.451004	0.451004	0.00173129	0.00236666	0.00379634	0.00343811	0.87291	19148901
Pou2f2	0.238382	-0.450951	0.450951	0.00780518	0.0106692	0.0109424	0.0137525	0.392299	19120050
Hsf5	0.65748	-0.450758	0.450758	0.000743612	0.00101634	0.0015632	0.00196464	0.781358	19142025
4833413G10Rik	0.924414	-0.450667	0.450667	0.00345403	0.00472052	0.00647611	0.00663065	0.959269	1.91442e+07
4930452B06Rik	0.00184451	-0.450303	0.450303	0.0178032	0.024325	0.0265744	0.038556	0.00783615	1.9037e+07
Nes	5.99405e-34	-0.450275	0.450275	0.431874	0.590069	0.354623	0.497053	7.92994e-32	17901620
CAAA01066123.1	0.023357	-0.450126	0.450126	0.00779838	0.0106538	0.0111657	0.016945	0.065398	19093239
Nostrin	0.213592	-0.450116	0.450116	0.00560421	0.0076562	0.00669942	0.00908644	0.362821	19124036
Herc2	8.05838e-31	-0.449667	0.449667	0.328838	0.449102	0.361769	0.492141	9.34661e-29	1.79625e+07
Dsn1	4.16624e-05	-0.449423	0.449423	0.0286265	0.0390893	0.042653	0.0626228	0.000286909	18965693
Otud3	0.00195148	-0.449402	0.449402	0.0244037	0.0333226	0.0370701	0.050835	0.0082103	1.90207e+07
Gm49870	0.321287	-0.448712	0.448712	0.00212994	0.00290699	0.00290308	0.00417485	0.482201	1.91341e+07
Gimap5	0.428715	-0.448631	0.448631	0.00235483	0.00321375	0.00357302	0.00466601	0.591675	19135712
1700086P04Rik	0.104922	-0.448577	0.448577	0.00352865	0.00481552	0.00446628	0.00712181	0.214299	19121523
Gm15879	0.0925047	-0.448561	0.448561	0.0072466	0.00988927	0.00982582	0.0137525	0.194981	19109977
Cd93	0.542215	-0.4485	0.4485	0.0193628	0.0264229	0.0207682	0.0225933	0.68773	1.91282e+07
Ckmt2	0.150122	-0.447802	0.447802	0.00418717	0.00571113	0.00513622	0.00761297	0.280872	1.91232e+07
Itga11	1.47394e-05	-0.447744	0.447744	0.0971509	0.132505	0.11724	0.146857	0.00011481	18855800
Ldhd	0.554041	-0.447731	0.447731	0.00631386	0.00861144	0.0111657	0.0125246	0.697969	19133066
Zfp993	0.180604	-0.44748	0.44748	0.00302468	0.00412462	0.00468959	0.00687623	0.321661	19125734
Gm10131	0.0362858	-0.447404	0.447404	0.00264906	0.00361221	0.00379634	0.00712181	0.0935685	1.91154e+07
BC025920	0.00299849	-0.447261	0.447261	0.00943273	0.012861	0.012059	0.0201375	0.0119277	19072373
Pcdhb12	0.0165768	-0.446917	0.446917	0.0198733	0.0270898	0.0292541	0.038556	0.0496308	19060327
2610035D17Rik	7.93011e-06	-0.446813	0.446813	0.0601719	0.0820158	0.072577	0.0999509	6.52203e-05	18898594
Pls3	2.18305e-30	-0.446276	0.446276	0.336743	0.458819	0.353506	0.485511	2.46452e-28	1.79768e+07
4632404H12Rik	0.00426695	-0.44577	0.44577	0.0249194	0.0339412	0.0328272	0.0446955	0.0160001	1.90371e+07
Cdh17	0.573481	-0.445158	0.445158	0.00453864	0.00617918	0.00982582	0.0110511	0.715172	19134408
Dusp27	0.159422	-0.444468	0.444468	0.0038057	0.00517884	0.00580616	0.00834971	0.293153	19122499
Grb14	7.13268e-09	-0.443775	0.443775	0.112084	0.152452	0.126396	0.170923	1.07651e-07	1.87386e+07
Naalad2	3.36651e-13	-0.44376	0.44376	0.140301	0.19083	0.15297	0.215619	9.54915e-12	1.85865e+07
Gm40841	4.26184e-05	-0.443281	0.443281	0.0378391	0.0514496	0.0482358	0.0692534	0.000292646	1.89563e+07
Sec61a1	6.78241e-76	-0.443164	0.443164	0.874678	1.1892	0.701206	0.847741	3.10414e-73	17056865
Gch1	0.861522	-0.442919	0.442919	0.00726071	0.00986986	0.0138455	0.0142436	0.920045	19141637
D430036J16Rik	0.216332	-0.442511	0.442511	0.00575279	0.00781786	0.00714605	0.0095776	0.365824	19123537
Shank3	0.137711	-0.442433	0.442433	0.0143667	0.0195228	0.0241179	0.029224	0.263682	1.90986e+07
Gng3	0.114699	-0.442392	0.442392	0.00834585	0.0113408	0.015632	0.0201375	0.22966	19104532
Paqr3	0.00110196	-0.442321	0.442321	0.0262181	0.0356249	0.0366235	0.0510806	0.00504342	19014218
Mturn	2.67232e-07	-0.442276	0.442276	0.0626874	0.0851762	0.0790531	0.11223	3.02899e-06	1.88475e+07
Synm	1.16068e-06	-0.441875	0.441875	0.0771304	0.104772	0.0895489	0.122053	1.1454e-05	1.88508e+07
4930432K21Rik	0.0689461	-0.441774	0.441774	0.00803215	0.0109099	0.0116123	0.0162083	0.156234	19103794
BC106179	0.317709	-0.441682	0.441682	0.0049538	0.00672818	0.00759268	0.0095776	0.479464	19127538
Shld2	3.43804e-09	-0.441584	0.441584	0.0878656	0.11933	0.120143	0.164538	5.47178e-08	1.87377e+07
Hes5	0.500227	-0.441553	0.441553	0.00137286	0.00186443	0.00178651	0.0024558	0.65503	19139588
Nrd1	8.18132e-33	-0.441551	0.441551	0.347333	0.4717	0.374274	0.512525	1.0339e-30	17910805
E430024P14Rik	0.00461462	-0.441132	0.441132	0.0110893	0.0150556	0.0145154	0.0228389	0.0171181	1.90704e+07
Arhgap10	7.6309e-15	-0.44083	0.44083	0.175263	0.237899	0.218178	0.291503	2.68095e-13	1.84689e+07
Ccdc17	0.0658298	-0.440813	0.440813	0.00772279	0.0104827	0.0109424	0.0154715	0.150501	1.91044e+07
Rgs5	0.00174179	-0.440811	0.440811	0.0883619	0.11994	0.0464493	0.0618861	0.00745588	1.90061e+07
Ube2q2	3.08543e-19	-0.440746	0.440746	0.206097	0.279736	0.256364	0.347986	1.64822e-17	18317314
Gm10767	0.109771	-0.439885	0.439885	0.00674164	0.00914502	0.00937919	0.0130157	0.221847	19112591
Adamtsl3	0.00143934	-0.439791	0.439791	0.0324561	0.0440237	0.0428763	0.0579568	0.0063556	19008431
Ptgr1	5.55133e-06	-0.439318	0.439318	0.056802	0.0770214	0.0835194	0.112721	4.71209e-05	1.88793e+07
Frmpd3	0.305304	-0.439236	0.439236	0.00377053	0.0051124	0.00580616	0.00761297	0.465683	19129218
Kcnk4	0.00724447	-0.439129	0.439129	0.00932995	0.0126494	0.0129522	0.0203831	0.0249901	19078163
1700101I11Rik	0.349157	-0.439001	0.439001	0.00309807	0.00419994	0.00401965	0.00540275	0.512714	19133075
Art5	0.0533424	-0.438702	0.438702	0.00265666	0.0036008	0.00401965	0.00712181	0.127549	19117483
BC037032	0.052276	-0.437938	0.437938	0.0187293	0.0253719	0.0250112	0.0319253	0.12553	19082131
Apba1	6.33813e-05	-0.437606	0.437606	0.0258884	0.0350621	0.0357302	0.0537819	0.000414081	18983093
Ankrd37	0.00101403	-0.437548	0.437548	0.0473572	0.0641359	0.061858	0.0798134	0.0047097	1.89795e+07
Gm33148	0.303748	-0.437315	0.437315	0.00173514	0.00234952	0.00245645	0.00368369	0.463811	1.91345e+07
Kdm1b	5.14868e-06	-0.437233	0.437233	0.0511131	0.0692075	0.0674408	0.0950393	4.4012e-05	18900414
Gchfr	4.70526e-05	-0.437205	0.437205	0.0660373	0.089413	0.0649844	0.0884086	0.000319226	1.89324e+07
Apmap	9.53797e-07	-0.436616	0.436616	0.0785087	0.106256	0.11188	0.147102	9.56848e-06	18820689
Rnf180	1.12748e-09	-0.436507	0.436507	0.0991371	0.134165	0.11188	0.158644	1.90737e-08	18734466
D6Ertd527e	0.919159	-0.436284	0.436284	0.0021426	0.00289918	0.00379634	0.00392927	0.956008	19144446
Sell	0.662423	-0.436217	0.436217	0.00149853	0.00202759	0.00223314	0.00270138	0.781358	19141422
Gucy1a1	4.42797e-21	-0.435863	0.435863	0.28783	0.389353	0.269093	0.371562	2.81119e-19	1.82583e+07
Adam8	0.0278295	-0.435703	0.435703	0.00914646	0.0123712	0.0129522	0.0189096	0.0755838	19091547
Gm15687	0.408672	-0.435621	0.435621	0.00205984	0.00278592	0.00267977	0.00368369	0.57298	19136536
Rab27b	0.000306263	-0.435614	0.435614	0.04964	0.0671375	0.0728004	0.0938114	0.00165062	1.8949e+07
Ppm1e	3.77176e-10	-0.435579	0.435579	0.111244	0.150452	0.132649	0.183202	6.91244e-09	1.8694e+07
Nwd2	0.963045	-0.435321	0.435321	0.001185	0.00160237	0.00200983	0.00196464	0.980574	19146097
Cxcl13	0.489507	-0.43522	0.43522	0.00146566	0.00198174	0.0015632	0.00221022	0.645887	1.91398e+07
0610009L18Rik	3.33344e-08	-0.435109	0.435109	0.086608	0.117095	0.11188	0.152996	4.44477e-07	1.8776e+07
Pecam1	0.0179893	-0.434871	0.434871	0.0269962	0.0364932	0.0321572	0.0417485	0.0529423	19057813
Gm49479	0.0571967	-0.434594	0.434594	0.0069182	0.00935016	0.00915587	0.0135069	0.134973	1.91061e+07
Fbxo41	0.772771	-0.434391	0.434391	0.00221282	0.00299028	0.00401965	0.00442043	0.864682	19141997
Kcnj15	1.91055e-20	-0.43417	0.43417	0.327251	0.44216	0.256588	0.353635	1.11563e-18	1.82868e+07
Oas1c	0.0678234	-0.434157	0.434157	0.00746091	0.0100806	0.00870925	0.0127701	0.154288	1.91087e+07
Sft2d1	2.56724e-11	-0.434011	0.434011	0.110488	0.149267	0.14962	0.20555	5.69027e-10	18640797
Gm9918	1.03235e-05	-0.433996	0.433996	0.035165	0.0475068	0.0428763	0.064833	8.31282e-05	1.89499e+07
Zfp971	1.91848e-05	-0.433918	0.433918	0.0523517	0.0707217	0.07749	0.10388	0.000145004	1.89038e+07
Rbm41	8.1692e-07	-0.433655	0.433655	0.0556646	0.0751835	0.0750335	0.10609	8.33357e-06	1.88669e+07
Gm47525	0.524502	-0.433391	0.433391	0.00208718	0.00281853	0.00267977	0.00343811	0.675328	19138770
Stx2	2.37351e-14	-0.433387	0.433387	0.127738	0.172497	0.163912	0.232564	7.89648e-13	18542313
Zfp51	5.31303e-05	-0.433239	0.433239	0.0454345	0.0613485	0.0640911	0.0874263	0.000354216	1.8935e+07
Tppp	0.0504349	-0.433237	0.433237	0.0140177	0.0189275	0.0216615	0.0282417	0.1218	1.90856e+07
Sertm1	0.226392	-0.433155	0.433155	0.00281293	0.00379796	0.00446628	0.00638507	0.378131	19128217
Gm20186	0.00100425	-0.433133	0.433133	0.0332917	0.0449492	0.0466726	0.0628684	0.0046694	1.89983e+07
Gm49937	0.369993	-0.433131	0.433131	0.00136487	0.00184279	0.00178651	0.00270138	0.53398	19137354
Sema3a	4.94089e-06	-0.432696	0.432696	0.0685043	0.0924639	0.0830728	0.112967	4.23641e-05	18877964
Hist1h1b	2.10795e-09	-0.43253	0.43253	0.140674	0.189854	0.0897722	0.131385	3.43562e-08	18775474
Ptger1	0.130044	-0.432499	0.432499	0.00534537	0.00721394	0.00893256	0.012279	0.252513	19115183
Car5b	0.000308129	-0.432415	0.432415	0.0317439	0.042838	0.0397499	0.0567289	0.0016591	1.89936e+07
Wnt11	1.38738e-05	-0.432186	0.432186	0.082601	0.111452	0.102501	0.132122	0.000108819	18869598
Gm35065	0.252372	-0.43193	0.43193	0.00211595	0.00285449	0.0031264	0.00466601	0.408066	19131676
Gm36423	0.633449	-0.431539	0.431539	0.00373837	0.00504183	0.00513622	0.00589391	0.764727	19138727
Mirt1	0.815298	-0.431293	0.431293	0.00137331	0.00185183	0.00245645	0.00221022	0.892226	1.91479e+07
Gm48050	0.0410317	-0.431111	0.431111	0.00542533	0.00731481	0.00826262	0.0127701	0.103521	19104745
Cited1	0.0240397	-0.430789	0.430789	0.0091499	0.0123338	0.011389	0.0171906	0.0669993	19093064
Metrnl	2.51515e-28	-0.430443	0.430443	0.396871	0.534842	0.365565	0.490668	2.5504e-26	1.80133e+07
Hmga1b	0.148895	-0.428885	0.428885	0.00308089	0.00414747	0.00513622	0.00761297	0.279148	1.91231e+07
Treml1	0.660866	-0.428223	0.428223	0.00132425	0.00178187	0.00178651	0.00221022	0.781358	19141830
Ppp1r3b	0.000691197	-0.428144	0.428144	0.0278467	0.0374678	0.0379634	0.0532908	0.00337701	19006378
Zfp28	0.00355174	-0.428001	0.428001	0.0296381	0.0398742	0.0435462	0.05722	0.0137695	19020112
Gm9844	0.178684	-0.427931	0.427931	0.00855158	0.0115045	0.0140688	0.0176817	0.319012	19112588
Dpep1	5.0667e-09	-0.427587	0.427587	0.21744	0.292453	0.159893	0.20776	7.82129e-08	1.86967e+07
Peg12	0.000169852	-0.427167	0.427167	0.0303154	0.0407617	0.0471192	0.0660609	0.000984206	1.89747e+07
Slfn3	0.153467	-0.426736	0.426736	0.00538521	0.00723874	0.00826262	0.0112967	0.285521	1.91181e+07
Gm29055	0.717069	-0.426437	0.426437	0.00765519	0.0102879	0.0138455	0.0147348	0.824254	19137203
Hyal3	0.0479087	-0.42607	0.42607	0.0064714	0.00869477	0.0096025	0.0142436	0.116799	19103490
Hp	0.438202	-0.426034	0.426034	0.00791862	0.0106389	0.00982582	0.0115422	0.60017	19129982
Ero1lb	0.000498607	-0.425779	0.425779	0.0368341	0.0494792	0.0486824	0.0663065	0.00253328	18986135
Rnf24	1.50129e-24	-0.4256	0.4256	0.314139	0.421929	0.328048	0.440324	1.24622e-22	18127113
Gpr165	0.130953	-0.42544	0.42544	0.00856534	0.0115031	0.00893256	0.012279	0.254045	19115255
Usp53	0.000758876	-0.425145	0.425145	0.0457466	0.0614243	0.0707905	0.0901277	0.00365807	1.89651e+07
Celf2	3.55198e-14	-0.424907	0.424907	0.163575	0.219597	0.169719	0.23944	1.15228e-12	18538934
Gm266	0.000473995	-0.424642	0.424642	0.0275301	0.036952	0.0451094	0.0621316	0.00241985	18990721
Notch4	0.0454499	-0.424624	0.424624	0.0124227	0.016674	0.0180884	0.0243124	0.112146	1.9089e+07
Clcn5	0.000211301	-0.424294	0.424294	0.0513829	0.0689515	0.0797231	0.102161	0.00119591	18935599
Col24a1	2.69744e-05	-0.424094	0.424094	0.053088	0.0712297	0.053372	0.0758841	0.000195541	1.89426e+07
4930430F08Rik	7.6766e-09	-0.424064	0.424064	0.0729815	0.0979194	0.096025	0.137033	1.15142e-07	1.87802e+07
Klf14	0.941869	-0.424017	0.424017	0.000811206	0.00108836	0.00178651	0.00171906	0.969327	19146292
C1qtnf3	0.264018	-0.423917	0.423917	0.00227767	0.00305565	0.00357302	0.00515717	0.421781	19131213
Asl	6.19917e-07	-0.423907	0.423907	0.0659889	0.0885278	0.0893256	0.123035	6.49609e-06	18842874
Baiap2l1	5.21264e-07	-0.423492	0.423492	0.0725635	0.09732	0.0859759	0.119597	5.56563e-06	18845264
Camsap3	0.900874	-0.423407	0.423407	0.00176344	0.00236494	0.00334971	0.00319253	0.945075	1.91471e+07
Zfp469	1.62172e-06	-0.423218	0.423218	0.0654806	0.0878039	0.0911121	0.123527	1.55241e-05	1.88529e+07
Etfbkmt	4.30938e-10	-0.423144	0.423144	0.11532	0.154627	0.125056	0.176081	7.82155e-09	1.87045e+07
Gm26916	0.000308105	-0.423106	0.423106	0.0518697	0.0695475	0.0580616	0.0780943	0.0016591	18966680
Gm49077	0.030148	-0.42296	0.42296	0.00819027	0.0109805	0.0116123	0.0171906	0.0806978	19094919
D930020B18Rik	0.779241	-0.422856	0.422856	0.00288225	0.00386389	0.00379634	0.00417485	0.868588	1.91422e+07
Creb3l4	0.0322992	-0.422531	0.422531	0.0114479	0.0153434	0.0147387	0.0208743	0.0850763	1.909e+07
Il21r	0.970032	-0.422262	0.422262	0.00146864	0.00196801	0.00290308	0.00294695	0.984331	19145288
Magi3	2.88556e-11	-0.421773	0.421773	0.101142	0.135487	0.129745	0.183694	6.34598e-10	18667552
Sncaip	3.59938e-12	-0.421422	0.421422	0.14561	0.195008	0.162349	0.223969	8.85929e-11	1.86013e+07
Matk	0.00442236	-0.421361	0.421361	0.014825	0.0198535	0.0252345	0.0358546	0.0164989	19049357
5330439K02Rik	0.0212566	-0.421136	0.421136	0.0116836	0.0156442	0.0145154	0.0211198	0.0607115	19085785
Tmem86b	0.096378	-0.420907	0.420907	0.00384614	0.00514909	0.00558285	0.00859528	0.201539	1.91183e+07
Olfml2a	8.64925e-05	-0.420897	0.420897	0.0944479	0.126443	0.096025	0.122544	0.000545702	1.8904e+07
Zfp85os	0.185641	-0.420832	0.420832	0.00381154	0.0051025	0.00491291	0.00712181	0.328249	19125566
Cd72	0.379587	-0.420211	0.420211	0.00774544	0.0103644	0.00915587	0.0110511	0.543034	1.91284e+07
Tmem120b	0.0107906	-0.419853	0.419853	0.020855	0.0278997	0.0339437	0.0446955	0.0348052	19048141
Spa17	3.74495e-09	-0.419638	0.419638	0.114498	0.153151	0.134212	0.181974	5.91024e-08	18720250
Scin	6.04127e-18	-0.41939	0.41939	0.266356	0.356215	0.217731	0.305992	2.90633e-16	1.83871e+07
Erh	3.75239e-37	-0.419241	0.419241	0.531626	0.710903	0.469406	0.600933	5.82963e-35	1.77704e+07
Gm43062	0.749995	-0.418985	0.418985	0.00287202	0.00383985	0.00491291	0.00540275	0.848747	19141187
Usp12	4.00239e-11	-0.418647	0.418647	0.128477	0.171731	0.167039	0.22446	8.65599e-10	18625698
Gm35248	0.661271	-0.418211	0.418211	0.000855713	0.00114346	0.00200983	0.0024558	0.781358	19141615
Ninj1	8.96124e-25	-0.417975	0.417975	0.44533	0.594984	0.406208	0.507367	7.54973e-23	18073589
Kcnu1	0.0833925	-0.41762	0.41762	0.0126104	0.0168439	0.0158553	0.0208743	0.180792	1.90999e+07
Adap1	0.654751	-0.417437	0.417437	0.00158549	0.00211751	0.00334971	0.00392927	0.780667	19140382
Plvap	0.37205	-0.417002	0.417002	0.0105657	0.0141068	0.012059	0.0142436	0.535681	1.91256e+07
Asb9	0.293431	-0.416673	0.416673	0.00195836	0.00261411	0.00223314	0.00343811	0.453042	19134714
Slit2	1.90409e-05	-0.416384	0.416384	0.075506	0.100769	0.0830728	0.110511	0.00014401	1.88964e+07
Gm19967	0.203745	-0.416273	0.416273	0.00746881	0.00996694	0.012059	0.0152259	0.350526	1.91167e+07
Fam78b	0.00760476	-0.416272	0.416272	0.0294338	0.0392787	0.041983	0.0542731	0.026016	1.90332e+07
Homer2	1.13326e-07	-0.416124	0.416124	0.0957675	0.127786	0.121706	0.161591	1.36297e-06	1.87802e+07
Opcml	0.0128241	-0.416115	0.416115	0.0189092	0.0252311	0.0299241	0.0397839	0.0401931	1.90558e+07
Stk39	2.5578e-22	-0.415826	0.415826	0.322464	0.430187	0.319116	0.424853	1.77515e-20	1.81869e+07
Erich2	0.370768	-0.415191	0.415191	0.00323911	0.00431928	0.00580616	0.00736739	0.534344	19131434
Abi3	0.446781	-0.414703	0.414703	0.00385811	0.00514296	0.00602948	0.00736739	0.607645	19133465
Dll1	4.83889e-09	-0.414585	0.414585	0.116851	0.155753	0.122823	0.168713	7.5107e-08	18737552
Gm44763	0.603072	-0.413888	0.413888	0.00331867	0.00442136	0.00736936	0.00834971	0.741154	19136636
Mpp4	0.119373	-0.41384	0.41384	0.00203783	0.00271485	0.00245645	0.00442043	0.236733	19127811
Dkk2	3.65942e-09	-0.413632	0.413632	0.133589	0.177945	0.104734	0.148084	5.78606e-08	18758862
Tmem255b	0.339875	-0.413416	0.413416	0.00241881	0.00322145	0.00357302	0.00491159	0.502824	19133487
Padi4	0.658666	-0.41307	0.41307	0.00165068	0.00219791	0.00290308	0.00343811	0.781358	19140795
Rcan3	6.31563e-08	-0.412318	0.412318	0.101017	0.134435	0.135998	0.178536	7.99319e-07	1.8756e+07
Sema7a	0.139134	-0.411777	0.411777	0.0274386	0.0365022	0.0350603	0.0410118	0.265595	1.90899e+07
Gm45494	0.273257	-0.411682	0.411682	0.00559249	0.00743933	0.00893256	0.0112967	0.430049	1.91241e+07
Tcf15	0.155561	-0.410776	0.410776	0.00161737	0.00215014	0.00223314	0.00392927	0.288339	19130250
Ooep	0.0427354	-0.410689	0.410689	0.0100101	0.0133066	0.0165252	0.0225933	0.106895	19090485
Gcnt4	0.822484	-0.410585	0.410585	0.00140246	0.00186419	0.00245645	0.00270138	0.896956	1.91434e+07
Nudt15	0.207109	-0.409747	0.409747	0.0115261	0.0153119	0.0196516	0.0235756	0.354548	19109542
Nup210l	0.661786	-0.409533	0.409533	0.00112137	0.00148947	0.00245645	0.00294695	0.781358	19141215
Aqp11	2.97692e-05	-0.409485	0.409485	0.0422201	0.0560773	0.0529254	0.0753929	0.000213245	1.89443e+07
Mtrf1	0.0038693	-0.409413	0.409413	0.0311674	0.0413949	0.0455561	0.0594303	0.0147507	19018814
Proscos	0.531851	-0.409323	0.409323	0.0041326	0.00548835	0.00580616	0.00687623	0.680152	19135910
Gm13205	0.0712334	-0.409249	0.409249	0.00239418	0.00317946	0.00290308	0.00540275	0.159815	19122947
Rnf222	0.138248	-0.409193	0.409193	0.00574827	0.00763338	0.00669942	0.0095776	0.26453	19119503
4833411C07Rik	0.0166287	-0.409078	0.409078	0.0143189	0.0190132	0.0160786	0.0233301	0.0497684	1.90803e+07
Amhr2	0.345662	-0.408701	0.408701	0.00267222	0.00354734	0.00379634	0.00515717	0.50928	1.91333e+07
Slx4ip	1.13939e-06	-0.408632	0.408632	0.0827503	0.109845	0.10987	0.144892	1.12776e-05	1.88253e+07
Bmp3	9.9092e-07	-0.408563	0.408563	0.109048	0.144747	0.0741402	0.104862	9.89984e-06	18870510
Tnfsf11	0.180104	-0.40811	0.40811	0.0166717	0.0221224	0.0214381	0.0257859	0.320938	19105587
Vat1l	0.149941	-0.40804	0.40804	0.00386421	0.00512735	0.00513622	0.00761297	0.280692	1.91232e+07
F13a1	0.0428308	-0.407814	0.407814	0.00942299	0.0125012	0.0107191	0.0157171	0.107037	19100221
Gm43403	0.786478	-0.407784	0.407784	0.00450917	0.00598207	0.00736936	0.00785855	0.872811	19141043
Gm5165	0.00071188	-0.407267	0.407267	0.0444913	0.0590031	0.0602948	0.078831	0.00346806	18976018
Tln2	7.44963e-17	-0.407183	0.407183	0.279706	0.370917	0.290531	0.377456	3.18566e-15	18349294
6030445D17Rik	0.839224	-0.406699	0.406699	0.00102236	0.0013553	0.00200983	0.00221022	0.907382	1.91439e+07
Hist1h2bm	0.215752	-0.406644	0.406644	0.0189607	0.0251343	0.0276909	0.0321709	0.365354	19104108
Syne3	0.0457531	-0.406389	0.406389	0.014047	0.0186174	0.0250112	0.0321709	0.112778	1.90801e+07
Gm12743	0.204438	-0.40607	0.40607	0.00831751	0.0110213	0.0118356	0.0149804	0.351182	1.9117e+07
Vstm2b	0.241424	-0.406027	0.406027	0.0122318	0.0162075	0.0163019	0.0196464	0.396014	19115026
Gm47123	0.00715824	-0.405933	0.405933	0.00705771	0.00935108	0.00736936	0.0132613	0.0247434	19092399
Prss27	0.654812	-0.405922	0.405922	0.00212236	0.00281199	0.00334971	0.00392927	0.780667	19140383
Galnt10	4.49506e-10	-0.405686	0.405686	0.118619	0.157137	0.155203	0.207515	8.10642e-09	18669461
Entpd1	0.236994	-0.405618	0.405618	0.0124308	0.0164665	0.0169719	0.0203831	0.390751	1.91141e+07
1700087I21Rik	0.162759	-0.405077	0.405077	0.00702514	0.00930241	0.0096025	0.0127701	0.297129	19116800
3830408C21Rik	0.0183616	-0.40476	0.40476	0.0203531	0.0269448	0.0247879	0.0333988	0.0539351	19067692
Cyp20a1	1.76261e-13	-0.404265	0.404265	0.144532	0.191276	0.181554	0.250246	5.21819e-12	1.85432e+07
Adamts9	3.33922e-13	-0.404062	0.404062	0.294261	0.389375	0.255025	0.32613	9.49975e-12	1.84816e+07
Plxnc1	5.60609e-06	-0.4039	0.4039	0.0315973	0.0418057	0.0395266	0.0613949	4.75619e-05	18950324
Nkain3	0.0379899	-0.403886	0.403886	0.00539904	0.00714329	0.00625279	0.0103143	0.0971052	19108772
Phf11c	0.115278	-0.403756	0.403756	0.00536333	0.00709541	0.00714605	0.0103143	0.230583	19116886
Slc24a5	9.38391e-20	-0.403609	0.403609	0.286209	0.378601	0.316883	0.415766	5.29691e-18	1.82521e+07
Il1r1	7.9886e-11	-0.403572	0.403572	0.147446	0.195039	0.166816	0.22446	1.62987e-09	18633944
Vps13a	1.1997e-19	-0.4033	0.4033	0.335928	0.444275	0.322019	0.418222	6.6175e-18	1.8252e+07
Tnn	2.62928e-08	-0.403205	0.403205	0.195804	0.258939	0.129075	0.174116	3.57455e-07	1.87511e+07
Ropn1l	0.0584019	-0.402513	0.402513	0.0126434	0.0167122	0.0200983	0.026277	0.137114	19089619
Arhgap6	0.00759759	-0.402332	0.402332	0.0256451	0.0338937	0.034167	0.0454322	0.0260019	1.9043e+07
Hivep3	7.41059e-23	-0.402272	0.402272	0.372568	0.492381	0.331398	0.442289	5.47995e-21	18163469
Arhgap28	5.98865e-12	-0.402123	0.402123	0.150042	0.198273	0.184234	0.246807	1.42833e-10	1.85832e+07
Gm44699	0.110962	-0.401853	0.401853	0.00925084	0.0122222	0.0138455	0.0181729	0.223668	19106315
Iqgap2	4.94655e-19	-0.401822	0.401822	0.288464	0.381111	0.288298	0.386542	2.55381e-17	1.8292e+07
E130208F15Rik	0.104659	-0.401797	0.401797	0.00632208	0.00835243	0.00870925	0.012279	0.214004	19113172
Mroh5	0.500016	-0.401128	0.401128	0.00125118	0.00165224	0.00178651	0.0024558	0.654908	19139585
Cks1brt	0.149381	-0.401064	0.401064	0.00361019	0.00476719	0.00513622	0.00761297	0.279763	1.91231e+07
Crispld1	3.83829e-19	-0.400778	0.400778	0.394222	0.52046	0.350826	0.440079	2.01231e-17	18247417
Rad51c	0.000652406	-0.400751	0.400751	0.0349972	0.0462032	0.0468959	0.0638507	0.00320878	18992209
Ppm1h	0.000984498	-0.400518	0.400518	0.0349401	0.0461203	0.0442162	0.060167	0.00459253	1.90014e+07
Tmem88b	0.658006	-0.400461	0.400461	0.00101582	0.00134082	0.0015632	0.00196464	0.781358	19142031
Btaf1	1.88962e-13	-0.400338	0.400338	0.166589	0.219866	0.208129	0.27775	5.57472e-12	1.85164e+07
Sord	4.65885e-05	-0.400129	0.400129	0.0540049	0.0712663	0.0777133	0.102898	0.000316331	1.89156e+07
Ncapd3	2.18526e-13	-0.400006	0.400006	0.186974	0.246715	0.219294	0.290029	6.40227e-12	18507036
Mcph1	1.92471e-05	-0.399723	0.399723	0.0508538	0.0670891	0.0757034	0.101916	0.000145375	18906095
Nptx1	0.45302	-0.399678	0.399678	0.0127471	0.0168161	0.0154087	0.0174361	0.612881	1.91269e+07
B3gntl1	0.00176697	-0.399563	0.399563	0.031187	0.041139	0.0464493	0.0618861	0.00755223	1.90063e+07
Dclre1c	0.00288433	-0.399424	0.399424	0.0341699	0.0450694	0.0451094	0.0594303	0.011536	1.90151e+07
BC043934	0.0255266	-0.399413	0.399413	0.0136942	0.0180623	0.0209915	0.0284872	0.0703789	19077431
Zfp619	0.0333258	-0.399318	0.399318	0.0161302	0.0212738	0.0238946	0.0314342	0.087278	19076985
Plekha8	4.49823e-09	-0.398576	0.398576	0.119115	0.157019	0.158776	0.208497	7.02056e-08	18695457
Ppp2r2c	0.819006	-0.398566	0.398566	0.00468304	0.00617317	0.0096025	0.0100688	0.894546	1.91412e+07
Tspan8	0.073404	-0.398235	0.398235	0.00834567	0.0109987	0.0129522	0.0176817	0.163663	19102434
Gm12915	0.508779	-0.397358	0.397358	0.00116989	0.00154086	0.00200983	0.00270138	0.66274	1.91394e+07
Hist2h3c2	0.444816	-0.397168	0.397168	0.00362983	0.0047802	0.00692273	0.00834971	0.606434	19132585
Gabra3	0.105387	-0.397139	0.397139	0.00617452	0.00813118	0.00870925	0.012279	0.214936	19113240
D630036H23Rik	0.320597	-0.396806	0.396806	0.00481616	0.00634091	0.00848593	0.0105599	0.481889	19126692
Fbxo17	1.56816e-09	-0.39662	0.39662	0.0948561	0.124871	0.121036	0.168468	2.59835e-08	1.8726e+07
Spns3	0.28529	-0.396359	0.396359	0.00306769	0.00403764	0.00446628	0.00613949	0.444345	19130424
Desi2	3.23726e-22	-0.396274	0.396274	0.311508	0.409977	0.344127	0.449165	2.22844e-20	18171384
Nek6	1.16709e-19	-0.396104	0.396104	0.292716	0.3852	0.310853	0.411591	6.45868e-18	18258257
Fscn2	0.943288	-0.395646	0.395646	0.00361016	0.00474929	0.00602948	0.00613949	0.969922	1.91446e+07
Dnaaf4	1.49408e-05	-0.395327	0.395327	0.0433498	0.0570154	0.0596248	0.0842338	0.000116058	18925460
M1ap	0.369935	-0.395141	0.395141	0.0011652	0.00153232	0.00178651	0.00270138	0.53398	19137353
Cyp51	2.90255e-11	-0.395029	0.395029	0.137007	0.18016	0.168825	0.227407	6.37478e-10	18619476
Plcb2	0.0466052	-0.394766	0.394766	0.00733428	0.0096426	0.00937919	0.013998	0.114279	19103658
Ptgr2	9.65365e-08	-0.394583	0.394583	0.0994424	0.130723	0.136445	0.178782	1.17777e-06	18761165
C2cd4a	0.44709	-0.394548	0.394548	0.00292873	0.00384991	0.00669942	0.00810413	0.607853	19132851
Gm49700	0.0158891	-0.394443	0.394443	0.0169863	0.0223273	0.0259044	0.0348723	0.0478681	1.90642e+07
Cdkl3	1.0089e-08	-0.394319	0.394319	0.105287	0.138381	0.133988	0.179519	1.48434e-07	18733639
Plin1	0.443865	-0.393488	0.393488	0.00357085	0.00469055	0.00513622	0.00638507	0.605625	19134277
Atp6v0e2	0.119464	-0.393287	0.393287	0.0115414	0.0151582	0.0183117	0.0230845	0.236857	19102036
Gm17655	0.207242	-0.393228	0.393228	0.0126263	0.0165825	0.0185351	0.0223477	0.354723	1.91105e+07
Zfp174	0.00320704	-0.392569	0.392569	0.0264718	0.0347503	0.0372934	0.0503438	0.012621	1.90269e+07
Gm49864	0.120886	-0.392538	0.392538	0.0133663	0.0175459	0.0185351	0.0233301	0.239021	19101962
Nudcd1	1.81829e-07	-0.392537	0.392537	0.0952107	0.124983	0.137561	0.178291	2.10753e-06	18769185
Dipk1a	2.80301e-27	-0.391964	0.391964	0.439088	0.576162	0.394596	0.524067	2.69694e-25	1.80159e+07
Depdc7	0.131029	-0.391944	0.391944	0.00511963	0.00671777	0.00893256	0.012279	0.254134	19115261
Ang	0.0350028	-0.391906	0.391906	0.016557	0.0217249	0.0261277	0.03389	0.0908845	19074871
Irx5	8.17682e-23	-0.391684	0.391684	0.454859	0.59674	0.335194	0.446464	5.96838e-21	1.81616e+07
Tspan12	0.00143471	-0.391406	0.391406	0.0235384	0.0308746	0.031264	0.0444499	0.00634013	19026028
Cfap47	0.127621	-0.39138	0.39138	0.00651029	0.0085392	0.00848593	0.0117878	0.249132	19115672
Dennd1c	0.898355	-0.391044	0.391044	0.00251481	0.00329777	0.00424297	0.00442043	0.943783	19144033
Slc24a4	0.160849	-0.3909	0.3909	0.00514434	0.00674531	0.00915587	0.012279	0.294785	19117279
Tnfaip8l3	0.839915	-0.39089	0.39089	0.000831881	0.00109076	0.00200983	0.00221022	0.907585	1.91439e+07
Cd19	0.653623	-0.390867	0.390867	0.00239357	0.0031384	0.00357302	0.00417485	0.780113	19140195
Zfp853	0.00302607	-0.390735	0.390735	0.021278	0.0278968	0.0310406	0.043222	0.0120092	1.90354e+07
9230116N13Rik	0.00770307	-0.390506	0.390506	0.0257128	0.0337058	0.0355069	0.0469057	0.0262872	1.90414e+07
Atp7a	1.77929e-09	-0.390468	0.390468	0.10653	0.139642	0.135552	0.184676	2.92529e-08	18709183
Fyb	9.5651e-06	-0.39003	0.39003	0.049106	0.0643495	0.0625279	0.0881631	7.73891e-05	1.89156e+07
Gm19667	0.444304	-0.389999	0.389999	0.00364926	0.00478197	0.00513622	0.00638507	0.606029	19134288
Kctd7	0.0185367	-0.389704	0.389704	0.0177223	0.0232184	0.026351	0.0351179	0.0542798	19065698
Plk1	0.29202	-0.389573	0.389573	0.0295481	0.0387082	0.0370701	0.0412574	0.451677	19105371
Tbxa2r	0.0077919	-0.389274	0.389274	0.0189456	0.0248136	0.0294774	0.0400295	0.0265436	1.90498e+07
Arhgap26	1.50132e-05	-0.389211	0.389211	0.0787671	0.103159	0.0973649	0.126965	0.000116568	18876118
Dusp10	0.00910887	-0.389137	0.389137	0.0216471	0.0283493	0.0337204	0.0446955	0.0301504	19046045
Prox2	0.0900979	-0.389126	0.389126	0.00860602	0.0112704	0.0129522	0.0174361	0.191553	19104895
Gm43465	0.524502	-0.388993	0.388993	0.00156912	0.00205473	0.00267977	0.00343811	0.675328	19138770
Ccdc80	3.45139e-08	-0.388851	0.388851	0.183216	0.239894	0.161009	0.20776	4.58399e-07	18721400
Crym	5.35723e-05	-0.388328	0.388328	0.062067	0.081238	0.0602948	0.0832515	0.000356882	18940372
Dab2	1.52582e-09	-0.388246	0.388246	0.170822	0.223572	0.195176	0.249263	2.53069e-08	18645671
Lrrtm2	0.0822232	-0.388113	0.388113	0.00692323	0.0090603	0.0111657	0.0154715	0.179009	19106502
Acta2	7.43389e-09	-0.388024	0.388024	0.22418	0.293362	0.11456	0.15889	1.117e-07	18753464
Lat2	0.102137	-0.387976	0.387976	0.00452582	0.00592229	0.00602948	0.00908644	0.210284	1.91179e+07
2210039B01Rik	0.0297027	-0.387815	0.387815	0.00700554	0.00916613	0.00937919	0.0144892	0.0798243	19099312
D630033O11Rik	2.90167e-07	-0.387701	0.387701	0.118902	0.15556	0.127066	0.166994	3.25842e-06	18786497
Vash1	0.0118773	-0.387658	0.387658	0.0120608	0.0157787	0.0171952	0.0250491	0.0377144	19074571
Gamt	6.00798e-13	-0.387505	0.387505	0.160802	0.21035	0.19272	0.262279	1.65161e-11	1.85448e+07
Rsph3a	0.0527949	-0.387071	0.387071	0.0138501	0.0181123	0.0252345	0.0321709	0.126555	1.9082e+07
Arl4d	0.0194149	-0.387016	0.387016	0.0300227	0.0392603	0.0460027	0.0569745	0.0563254	1.90439e+07
Socs2	1.53497e-20	-0.386961	0.386961	0.305866	0.399962	0.317552	0.424853	9.21745e-19	18229559
Asah2	3.08464e-08	-0.386956	0.386956	0.113402	0.148288	0.134435	0.178782	4.14565e-07	1.87476e+07
Zfp40	1.26981e-06	-0.386843	0.386843	0.0534798	0.0699264	0.0719071	0.102161	1.24151e-05	1.88767e+07
Svep1	3.69945e-06	-0.386468	0.386468	0.113428	0.148272	0.119696	0.153487	3.2782e-05	1.88316e+07
Gm46218	0.000109124	-0.386424	0.386424	0.0512516	0.0669935	0.0609647	0.0830059	0.000669534	1.89487e+07
Mgll	0.000813222	-0.386298	0.386298	0.061296	0.080116	0.0839661	0.104862	0.00387809	18952534
Iqcb1	4.36616e-10	-0.386238	0.386238	0.153811	0.201028	0.176195	0.232564	7.91612e-09	18645821
Synpr	0.0018028	-0.386202	0.386202	0.0395577	0.0516999	0.0518088	0.06778	0.00767243	18999932
A930004D18Rik	0.00304591	-0.386195	0.386195	0.0180222	0.023554	0.0288075	0.0405206	0.012071	1.90391e+07
Gpm6a	0.217845	-0.385942	0.385942	0.00291059	0.0038033	0.00669942	0.00466601	0.367722	19164055
B3gat2	0.151903	-0.385893	0.385893	0.00596982	0.00780058	0.0080393	0.0110511	0.283358	19118284
Arhgap18	0.00418483	-0.385847	0.385847	0.0387498	0.0506315	0.0562751	0.0712181	0.0157585	1.90078e+07
Ldlr	0.00164406	-0.385667	0.385667	0.0397996	0.0519968	0.057615	0.0744106	0.00711488	18991678
Gm26549	0.0064665	-0.385447	0.385447	0.0388567	0.0507571	0.0524788	0.0663065	0.0227092	1.90189e+07
Tnip2	0.00162401	-0.385058	0.385058	0.0411694	0.0537636	0.0600715	0.077112	0.0070371	18988715
Fibcd1	0.659401	-0.385	0.385	0.00102839	0.00134293	0.00267977	0.00319253	0.781358	19140990
Galnt17	0.0397637	-0.384698	0.384698	0.0122697	0.0160191	0.0194283	0.0260314	0.100863	19085382
Gm3830	4.7178e-06	-0.38469	0.38469	0.0634558	0.0828466	0.0770433	0.106336	4.05951e-05	18885403
Gm16576	0.274092	-0.38469	0.38469	0.00566023	0.00738988	0.00915587	0.0115422	0.430971	1.91239e+07
Rap1gds1	1.41231e-19	-0.384564	0.384564	0.315022	0.41125	0.351496	0.449411	7.73981e-18	18233316
Bcl2l12	7.63246e-11	-0.384543	0.384543	0.136144	0.177728	0.177981	0.236739	1.56097e-09	1.86215e+07
Fat3	2.51353e-06	-0.384437	0.384437	0.0766107	0.100004	0.0812863	0.111739	2.32336e-05	1.88717e+07
Slc35f3	0.0895568	-0.384309	0.384309	0.0239287	0.0312326	0.0337204	0.0405206	0.190714	1.90824e+07
Gm19299	0.40903	-0.384274	0.384274	0.00197914	0.00258319	0.00267977	0.00368369	0.573292	19136543
4632428C04Rik	0.37047	-0.384083	0.384083	0.00391356	0.00510731	0.00558285	0.00712181	0.534083	1.91317e+07
Npr3	0.00708747	-0.384	0.384	0.0380879	0.049703	0.0433229	0.0559921	0.0245356	19030481
Spef2	0.211323	-0.383977	0.383977	0.00276019	0.00360186	0.00379634	0.00564833	0.359943	1.91288e+07
Cideb	0.00128672	-0.383668	0.383668	0.0205212	0.0267731	0.026351	0.0388016	0.00578271	19033342
Pxdc1	4.11591e-06	-0.38327	0.38327	0.085485	0.111498	0.112104	0.145629	3.602e-05	1.88409e+07
Gria1	0.37478	-0.383232	0.383232	0.00860131	0.0112183	0.0107191	0.0127701	0.538297	19126848
Ubl4b	0.660125	-0.383161	0.383161	0.00130438	0.00170117	0.00178651	0.00221022	0.781358	19141821
Tjp2	6.75161e-08	-0.383109	0.383109	0.106132	0.138411	0.124386	0.16724	8.47799e-07	18769150
Insig1	4.4462e-07	-0.382262	0.382262	0.0917155	0.11954	0.118133	0.156189	4.82641e-06	18802499
Lama2	5.7441e-14	-0.382154	0.382154	0.204313	0.266278	0.211702	0.2861	1.79136e-12	1.84972e+07
Cpne4	0.420882	-0.382097	0.382097	0.00136321	0.00177659	0.0031264	0.00417485	0.584151	19136137
Nat2	0.0274695	-0.382094	0.382094	0.0362232	0.0472073	0.0529254	0.0638507	0.0748461	19043773
1700105P06Rik	0.000803989	-0.382051	0.382051	0.0410005	0.0534316	0.0529254	0.0704813	0.0038438	1.89869e+07
Mustn1	0.0133524	-0.382012	0.382012	0.0165387	0.0215526	0.0189817	0.0270138	0.0415491	19072755
Cdpf1	1.18332e-08	-0.381563	0.381563	0.101773	0.132586	0.140241	0.18664	1.71562e-07	1.87284e+07
Utp14b	2.5955e-07	-0.381541	0.381541	0.0692031	0.0901531	0.0931219	0.128929	2.94982e-06	18826558
Gzf1	2.64632e-11	-0.381361	0.381361	0.148372	0.193265	0.190264	0.251719	5.85022e-10	1.85954e+07
AC163347.1	0.0912722	-0.38128	0.38128	0.00115851	0.00150895	0.00178651	0.00368369	0.193192	19128419
Gm10010	0.151993	-0.38078	0.38078	0.0054986	0.00715942	0.0080393	0.0110511	0.283379	19118290
Vdr	6.35255e-14	-0.380598	0.380598	0.249599	0.324949	0.221751	0.299116	1.97022e-12	18487589
6530403H02Rik	0.00282254	-0.380495	0.380495	0.0235632	0.0306743	0.0267977	0.0383104	0.0113343	1.90415e+07
Polr2l	1.17308e-13	-0.380414	0.380414	0.210535	0.274057	0.249665	0.323428	3.51593e-12	18472162
A830008E24Rik	0.525341	-0.380343	0.380343	0.0024749	0.00322146	0.00267977	0.00343811	0.67622	19138784
Gm46404	0.018955	-0.379886	0.379886	0.0267125	0.0347593	0.034837	0.0446955	0.0553039	1.90554e+07
Gm10125	0.0211721	-0.379755	0.379755	0.0181382	0.0235999	0.0256811	0.0341356	0.0605272	1.90684e+07
Tm6sf2	0.189887	-0.379542	0.379542	0.00407444	0.00530055	0.00513622	0.00736739	0.333159	19125374
Dera	1.26864e-08	-0.379517	0.379517	0.118031	0.153547	0.164136	0.213163	1.8268e-07	18704054
Nln	6.1953e-08	-0.379371	0.379371	0.102788	0.133704	0.136445	0.179764	7.8703e-07	1.87549e+07
Tent5c	0.00958995	-0.379338	0.379338	0.027154	0.0353205	0.0359536	0.0471513	0.0315271	19043912
1700112D23Rik	0.276564	-0.379096	0.379096	0.00267026	0.00347275	0.00401965	0.00564833	0.434245	19130848
Trmt5	9.70582e-05	-0.378849	0.378849	0.0453575	0.0589786	0.0631979	0.0857073	0.000603371	1.89441e+07
Plcb1	1.10867e-10	-0.378847	0.378847	0.123021	0.159965	0.137115	0.192289	2.21655e-09	18672267
Hist1h1d	2.62025e-05	-0.378776	0.378776	0.07706	0.100196	0.0710138	0.0967583	0.000190844	18916058
Ankib1	3.28978e-13	-0.378736	0.378736	0.161502	0.209985	0.202546	0.273576	9.37864e-12	18527464
Gm11713	0.10239	-0.37861	0.37861	0.00707639	0.00919994	0.0118356	0.0159627	0.210651	1.91081e+07
Rarb	1.24541e-17	-0.37847	0.37847	0.280292	0.364369	0.284502	0.377701	5.84204e-16	1.83317e+07
Fads3	0.000366002	-0.377789	0.377789	0.0457836	0.0594888	0.0609647	0.0807957	0.00192182	18965535
Gm536	0.00849901	-0.377717	0.377717	0.017607	0.0228765	0.0236713	0.0331532	0.0285333	19059685
Kif4	0.261164	-0.377615	0.377615	0.0308062	0.0400231	0.0413131	0.0459234	0.418486	19100417
Cul2	5.92733e-13	-0.377327	0.377327	0.167626	0.217734	0.215051	0.285118	1.63741e-11	1.85229e+07
Gm4724	0.15902	-0.377301	0.377301	0.00960576	0.012477	0.0171952	0.0213654	0.2927	1.91075e+07
Prkg2	0.142079	-0.377277	0.377277	0.0133302	0.0173144	0.0218848	0.0267682	0.269154	19101133
Eid2b	1.60326e-07	-0.377188	0.377188	0.100094	0.130003	0.135998	0.1778	1.88147e-06	18768567
Ufd1	2.5119e-20	-0.376797	0.376797	0.293697	0.381353	0.329388	0.434676	1.46174e-18	1.8227e+07
Gm49322	0.010188	-0.376611	0.376611	0.0161164	0.0209237	0.0238946	0.0331532	0.0332096	1.90615e+07
Pcdhga1	0.0321953	-0.376502	0.376502	0.00943283	0.0122456	0.012059	0.0176817	0.0848583	19094728
Mreg	0.0507897	-0.376209	0.376209	0.00189475	0.00245925	0.00290308	0.00564833	0.122448	1.91207e+07
Macrod2	6.3669e-13	-0.376145	0.376145	0.176484	0.229053	0.205002	0.275295	1.74744e-11	1.85331e+07
AU041133	1.05739e-08	-0.376035	0.376035	0.102902	0.133543	0.127289	0.173625	1.5503e-07	1.87413e+07
Dhx57	6.7116e-11	-0.376023	0.376023	0.1331	0.172732	0.168155	0.226424	1.38772e-09	18630174
9330104G04Rik	0.00151947	-0.375745	0.375745	0.0213525	0.027705	0.0283609	0.0410118	0.00664705	1.90316e+07
Decr1	3.37329e-17	-0.375729	0.375729	0.281531	0.365285	0.332738	0.424853	1.50721e-15	1.83089e+07
Gm38102	0.52026	-0.375345	0.375345	0.00179593	0.00232959	0.00245645	0.00319253	0.672012	1.9139e+07
Pcdhga9	0.054333	-0.375345	0.375345	0.0124537	0.0161544	0.0178651	0.0238212	0.129351	19091593
Lpin3	0.210133	-0.375299	0.375299	0.00216275	0.00280532	0.00379634	0.00564833	0.358311	1.91288e+07
Top1mt	0.0008095	-0.375296	0.375296	0.0366747	0.0475709	0.0522555	0.0697446	0.0038642	18987818
Zfp747	0.0633985	-0.375158	0.375158	0.0204356	0.0265046	0.0323805	0.0397839	0.146246	1.90775e+07
Htra3	7.96537e-06	-0.374971	0.374971	0.0987614	0.128075	0.110764	0.142682	6.54467e-05	1.88522e+07
Mfsd2b	0.653329	-0.37473	0.37473	0.00212492	0.00275516	0.00357302	0.00417485	0.779996	19140190
Slc23a4	0.312805	-0.374586	0.374586	0.00222433	0.00288378	0.00267977	0.00392927	0.473899	19134303
Rubcnl	0.231036	-0.373439	0.373439	0.00352514	0.0045666	0.00468959	0.00663065	0.383867	1.9128e+07
Gm49894	0.354956	-0.373233	0.373233	0.00119249	0.00154458	0.0015632	0.0024558	0.518915	19137553
Bmt2	2.39804e-08	-0.373169	0.373169	0.136011	0.176161	0.172175	0.221022	3.28016e-07	1.87053e+07
Rad9b	2.81817e-05	-0.372808	0.372808	0.0467741	0.0605664	0.0582849	0.081778	0.00020299	1.89353e+07
Gm31763	0.216297	-0.372768	0.372768	0.00289983	0.0037548	0.00401965	0.00589391	0.365801	19128621
Tmem220	0.000434779	-0.37274	0.37274	0.0443624	0.0574409	0.0598481	0.0793222	0.00224126	1.89693e+07
Vmn1r4	0.181655	-0.372662	0.372662	0.00382673	0.00495461	0.00468959	0.00687623	0.323125	19125782
Eldr	0.0313698	-0.372646	0.372646	0.0169117	0.021896	0.0310406	0.0395383	0.0832235	1.90675e+07
Znrd1as	0.000124407	-0.372626	0.372626	0.0650058	0.0841634	0.0877624	0.112475	0.000751859	1.89185e+07
4930540M05Rik	0.439712	-0.372462	0.372462	0.00321716	0.0041648	0.00446628	0.00564833	0.601801	19134897
Dnaic1	0.0636167	-0.372408	0.372408	0.00793212	0.0102682	0.0102724	0.0147348	0.146629	19105165
1700066B19Rik	0.44493	-0.372204	0.372204	0.00302395	0.00391399	0.00535954	0.00663065	0.606443	19134075
Gm9967	0.105387	-0.372176	0.372176	0.00617737	0.00799539	0.00870925	0.012279	0.214936	19113240
Shtn1	1.80114e-07	-0.372149	0.372149	0.128935	0.166877	0.145824	0.188605	2.09194e-06	1.876e+07
Eml1	1.78002e-05	-0.372128	0.372128	0.0496296	0.0642336	0.0701206	0.0960216	0.000135474	18912382
1700029J07Rik	1.36471e-08	-0.371754	0.371754	0.105695	0.136762	0.122376	0.16724	1.94365e-07	18750835
Ccdc186	3.54197e-21	-0.371709	0.371709	0.32804	0.424446	0.353283	0.462181	2.28599e-19	18189021
Myo1f	0.917486	-0.371678	0.371678	0.00180097	0.00233019	0.00357302	0.00343811	0.95534	19146899
Dtd2	2.52869e-15	-0.371608	0.371608	0.224172	0.290032	0.272666	0.357073	9.4319e-14	18404386
Trmt10c	2.25435e-10	-0.371361	0.371361	0.138526	0.179193	0.182001	0.239686	4.26062e-09	1.86314e+07
Arhgap42	5.38117e-17	-0.371243	0.371243	0.249526	0.322753	0.267307	0.357318	2.35464e-15	18362966
Gimap8	0.926519	-0.371069	0.371069	0.00310603	0.00401706	0.00580616	0.00564833	0.960378	19147064
Apoh	0.304614	-0.370749	0.370749	0.00205896	0.00266228	0.00245645	0.00368369	0.464723	1.91345e+07
Gm46212	0.147314	-0.370724	0.370724	0.0041594	0.00537811	0.00759268	0.0105599	0.277087	19118660
Mlf1	0.251576	-0.370483	0.370483	0.0137573	0.0177853	0.0245645	0.0284872	0.407277	19109371
Klhl11	2.13755e-05	-0.370326	0.370326	0.0668891	0.0864638	0.0931219	0.121807	0.000159249	18885991
Cdc45	0.0623588	-0.370297	0.370297	0.0249789	0.0322882	0.0404198	0.0486248	0.14445	19069927
Cab39l	3.32539e-15	-0.370056	0.370056	0.273551	0.353538	0.298124	0.382367	1.21888e-13	1.83889e+07
Trmt10b	3.64695e-06	-0.369857	0.369857	0.0754782	0.0975348	0.0982582	0.130894	3.23676e-05	1.88546e+07
Gm35315	0.544443	-0.36974	0.36974	0.00736086	0.00951111	0.012059	0.0135069	0.68978	19132263
Rfx2	0.29748	-0.369656	0.369656	0.0125458	0.0162098	0.0207682	0.0240668	0.457209	19115287
Mcc	0.00831071	-0.369346	0.369346	0.0919481	0.118776	0.119696	0.136788	0.0280457	18971158
Kcnb1	0.0619138	-0.368856	0.368856	0.0176805	0.0228313	0.0261277	0.0329077	0.143544	19083459
1700056E22Rik	0.0232891	-0.368827	0.368827	0.0219037	0.0282843	0.0328272	0.0422397	0.0652325	1.90608e+07
Tfr2	0.00110304	-0.368784	0.368784	0.0335005	0.043258	0.0468959	0.0631139	0.00504696	18999226
Id4	2.16084e-21	-0.368615	0.368615	0.533668	0.689026	0.410674	0.50835	1.40737e-19	18153473
Emid1	5.61364e-06	-0.368458	0.368458	0.0563619	0.0727616	0.0761501	0.104862	4.76021e-05	18888990
Egfl7	3.63311e-05	-0.368431	0.368431	0.0768616	0.0992243	0.0987048	0.127456	0.000254122	1.88875e+07
4833408A19Rik	0.00261308	-0.368027	0.368027	0.025664	0.0331217	0.034837	0.047888	0.0105937	1.90277e+07
Stk25	7.30989e-20	-0.36801	0.36801	0.294432	0.379986	0.336757	0.441798	4.19613e-18	18233513
Tesk2	0.000103268	-0.367933	0.367933	0.0415572	0.0536297	0.0522555	0.0729371	0.000638311	18960546
Mmp13	5.75092e-06	-0.367777	0.367777	0.239399	0.308911	0.105628	0.138016	4.8693e-05	18852797
Kcnab3os	0.428483	-0.36774	0.36774	0.00226775	0.00292614	0.00357302	0.00466601	0.591452	19135707
Ppp1r3c	3.60337e-09	-0.367478	0.367478	0.138908	0.179204	0.143368	0.193762	5.70276e-08	18708300
Ppp1r36	0.143645	-0.367279	0.367279	0.0255977	0.033019	0.0395266	0.0456778	0.271545	1.90875e+07
Hspb7	0.127103	-0.367215	0.367215	0.00342252	0.00441457	0.00580616	0.00859528	0.2484	19120337
Crabp2	1.93296e-10	-0.367214	0.367214	0.211859	0.273269	0.212372	0.272839	3.69861e-09	18601133
Pdgfd	5.3622e-18	-0.367173	0.367173	0.317172	0.409095	0.314203	0.409627	2.59438e-16	18299422
Klk10	0.982794	-0.36716	0.36716	0.00133501	0.00172191	0.00223314	0.00221022	0.990869	19145890
B930094E09Rik	0.536969	-0.367136	0.367136	0.0030094	0.00388149	0.00446628	0.00540275	0.683584	19137166
Cep290	2.39465e-16	-0.367008	0.367008	0.270241	0.348523	0.287852	0.376228	9.84246e-15	18364079
Foxred1	9.58292e-05	-0.366885	0.366885	0.062487	0.080581	0.091782	0.117633	0.000596607	1.891e+07
Dop1b	6.07029e-14	-0.366649	0.366649	0.250566	0.323069	0.253685	0.331778	1.8896e-12	18459332
Gm26704	0.290689	-0.366648	0.366648	0.00380911	0.0049113	0.00468959	0.00638507	0.450368	19130264
Fam122b	0.00547575	-0.366638	0.366638	0.0259906	0.0335108	0.0375167	0.0498527	0.0197753	19033922
Gm15816	0.393257	-0.366627	0.366627	0.00156199	0.00201393	0.00223314	0.00319253	0.556528	19136958
Fbxl18	2.69382e-07	-0.366604	0.366604	0.0670076	0.0863938	0.0879857	0.123035	3.04927e-06	18834157
Wwp1	2.37576e-17	-0.366579	0.366579	0.2747	0.354169	0.310853	0.402996	1.07858e-15	18319653
Syt6	1.568e-11	-0.366067	0.366067	0.177233	0.228425	0.145601	0.205796	3.56888e-10	18637700
Ticam1	0.00418269	-0.365963	0.365963	0.0213365	0.0274973	0.0357302	0.0481336	0.0157571	19032698
Gm29674	0.0899808	-0.365648	0.365648	0.00609885	0.00785812	0.00692273	0.0103143	0.1914	19114889
Kctd21	0.150698	-0.365534	0.365534	0.00811096	0.0104498	0.0131755	0.016945	0.281666	1.91112e+07
Mansc1	0.0134396	-0.365474	0.365474	0.0154737	0.0199349	0.0221081	0.0306974	0.0417818	1.90677e+07
Epb41l4a	0.022774	-0.365355	0.365355	0.040837	0.0526061	0.0652077	0.0773576	0.0641581	19030120
Slc13a5	0.162832	-0.365138	0.365138	0.041342	0.0532487	0.031264	0.0365914	0.29723	1.90959e+07
Nlrp3	0.839677	-0.364799	0.364799	0.00154811	0.00199351	0.00267977	0.0024558	0.907585	19147713
Zc2hc1a	1.52131e-06	-0.364784	0.364784	0.0904037	0.116412	0.123046	0.159627	1.46458e-05	1.88146e+07
Lgals2	0.433409	-0.364606	0.364606	0.00619841	0.00798064	0.0104958	0.012279	0.595822	19129308
Wdr47	4.58773e-07	-0.364494	0.364494	0.101145	0.130217	0.131085	0.170923	4.9673e-06	1.87886e+07
Anxa11	1.02419e-07	-0.364421	0.364421	0.118834	0.152982	0.159	0.203585	1.24267e-06	1.87391e+07
Cap2	0.000344536	-0.364231	0.364231	0.0138633	0.0178448	0.019205	0.0314342	0.00182495	19035284
Itga8	4.57336e-07	-0.363818	0.363818	0.108827	0.140041	0.118133	0.157417	4.95491e-06	1.88022e+07
Hist2h3b	0.174721	-0.363748	0.363748	0.00708931	0.00912227	0.0122823	0.0157171	0.313454	19114296
Pibf1	5.50268e-12	-0.363546	0.363546	0.168233	0.216446	0.202322	0.26891	1.31986e-10	1.85627e+07
Epb41l5	0.000390627	-0.363459	0.363459	0.0436147	0.0561106	0.0616347	0.0815324	0.0020366	18965574
Ppfia3	0.323598	-0.363416	0.363416	0.00520025	0.00668995	0.0111657	0.0135069	0.484652	19124224
Bin2	0.717416	-0.363294	0.363294	0.00473465	0.00609046	0.00781599	0.00712181	0.824522	1.91518e+07
Ckap2l	0.0886168	-0.362836	0.362836	0.0516268	0.0663895	0.0569451	0.0653242	0.189235	19065217
Eif3j2	0.000942292	-0.362794	0.362794	0.0443432	0.0570215	0.0743636	0.094057	0.00441404	18964587
Tigd4	0.659777	-0.362748	0.362748	0.00200856	0.00258275	0.00290308	0.00343811	0.781358	19140812
Gm33651	0.0623835	-0.36273	0.36273	0.0067358	0.00866127	0.00781599	0.0117878	0.144475	19109613
Gm49463	0.140534	-0.36263	0.36263	0.0136947	0.0176082	0.0212148	0.0260314	0.266913	19101597
Ccn2	6.44324e-08	-0.362584	0.362584	0.17434	0.224154	0.150737	0.195727	8.13039e-07	18740345
Col6a4	0.67609	-0.362322	0.362322	0.00816176	0.0104919	0.0122823	0.0132613	0.792203	19136434
Adam28	0.431776	-0.362046	0.362046	0.00319003	0.00409997	0.00379634	0.00491159	0.594206	19135500
Rinl	0.323742	-0.361893	0.361893	0.00709236	0.00911447	0.011389	0.0137525	0.484768	1.9124e+07
Hist1h4f	0.370107	-0.36185	0.36185	0.000750865	0.000964916	0.00178651	0.00270138	0.53398	19137356
Myl2	0.536587	-0.361431	0.361431	0.00335203	0.00430636	0.00446628	0.00540275	0.683406	19137158
Pea15a	3.79838e-11	-0.361242	0.361242	0.17253	0.22162	0.202099	0.265226	8.24637e-10	1.85881e+07
Cxcl12	2.40681e-30	-0.361199	0.361199	0.707773	0.90913	0.483698	0.615914	2.69913e-28	1.7903e+07
Terf1	6.24534e-08	-0.361129	0.361129	0.135535	0.174086	0.171282	0.21832	7.92793e-07	18720194
Gm43387	0.44555	-0.361083	0.361083	0.0048172	0.00618716	0.0080393	0.0095776	0.606995	19131644
Tmc8	0.211378	-0.360877	0.360877	0.00282389	0.00362645	0.00379634	0.00564833	0.359962	1.91289e+07
Acap2	2.75477e-23	-0.360623	0.360623	0.432877	0.555806	0.439035	0.553536	2.12042e-21	1.80887e+07
Cbwd1	8.18006e-06	-0.360556	0.360556	0.0902452	0.115868	0.128406	0.162328	6.69832e-05	18834745
Veph1	0.147079	-0.360371	0.360371	0.00854728	0.0109726	0.0118356	0.0154715	0.276706	1.91126e+07
Lmo2	0.139494	-0.359991	0.359991	0.015608	0.0200316	0.0214381	0.026277	0.265833	19101267
Cops2	1.42595e-23	-0.359864	0.359864	0.388336	0.498353	0.414917	0.534136	1.12312e-21	1.80925e+07
Sdf2l1	1.06004e-08	-0.359761	0.359761	0.132663	0.170235	0.171505	0.222495	1.55283e-07	18693951
Taco1	0.00630283	-0.359756	0.359756	0.0240095	0.0308092	0.0372934	0.0493615	0.0222498	19036200
Loxl2	5.37337e-08	-0.359642	0.359642	0.239101	0.306792	0.216615	0.263998	6.90384e-07	18681940
Ccn5	0.0231175	-0.359482	0.359482	0.0264396	0.0339211	0.0225547	0.0304519	0.0648563	19073892
A430105J06Rik	0.0633202	-0.359095	0.359095	0.0208274	0.0267136	0.0290308	0.0361002	0.146145	1.90808e+07
Bloc1s6	8.07732e-09	-0.359033	0.359033	0.13764	0.176532	0.179321	0.229862	1.20938e-07	1.86834e+07
Tspyl5	0.151994	-0.358958	0.358958	0.009056	0.0116143	0.0131755	0.016945	0.283379	1.91113e+07
Casc4	8.32769e-31	-0.358925	0.358925	0.525127	0.67346	0.50268	0.637525	9.59327e-29	1.78849e+07
Gabre	0.122696	-0.35869	0.35869	0.0143966	0.0184602	0.0187584	0.0235756	0.241821	19101935
Xkrx	0.661903	-0.358681	0.358681	0.00131174	0.00168199	0.00223314	0.00270138	0.781358	19141415
Pcdhga4	0.172442	-0.358507	0.358507	0.00316193	0.00405391	0.00424297	0.00638507	0.310586	19126197
A930024E05Rik	0.0474334	-0.358471	0.358471	0.0140904	0.0180648	0.019205	0.0255403	0.115916	1.9088e+07
Cib2	1.62406e-23	-0.358335	0.358335	0.423117	0.542413	0.426976	0.545678	1.27324e-21	18087900
Ubash3a	0.919253	-0.357969	0.357969	0.00234726	0.0030083	0.00357302	0.00343811	0.956008	19146873
Pak1	7.84226e-23	-0.357955	0.357955	0.438804	0.562374	0.416927	0.52947	5.74895e-21	18110995
4933431K23Rik	0.321066	-0.35795	0.35795	0.00899306	0.0115255	0.0136222	0.0162083	0.482091	19121989
Wdr5b	0.00131201	-0.357765	0.357765	0.0297558	0.0381303	0.0424297	0.0577112	0.00587923	1.90077e+07
Mall	0.0140523	-0.357607	0.357607	0.0201174	0.0257764	0.0221081	0.0306974	0.0433604	1.90682e+07
Sdsl	0.00426496	-0.357519	0.357519	0.049642	0.0636023	0.0609647	0.0768664	0.0159962	19003003
Ttc39a	0.315494	-0.357461	0.357461	0.00424799	0.00544239	0.00692273	0.00884086	0.476951	19128214
Serpinb8	0.142198	-0.356802	0.356802	0.0152538	0.0195337	0.0205449	0.0252947	0.269318	19102426
D030028A08Rik	0.0406766	-0.356563	0.356563	0.0162772	0.0208408	0.0256811	0.0331532	0.102763	1.90776e+07
Gm10561	2.87311e-06	-0.356562	0.356562	0.0618327	0.0791689	0.0777133	0.108055	2.60876e-05	1.8878e+07
Gm44752	0.534074	-0.356302	0.356302	0.00266216	0.00340794	0.00491291	0.00589391	0.681734	19136708
Tmem40	0.000765044	-0.356242	0.356242	0.0426169	0.0545533	0.0453327	0.0621316	0.00368256	1.89963e+07
E530011L22Rik	0.0119791	-0.356172	0.356172	0.0205069	0.0262493	0.0267977	0.0363458	0.0379947	19059228
Ppox	7.05734e-10	-0.356167	0.356167	0.127036	0.162609	0.152747	0.20776	1.23205e-08	18676123
Il34	0.933481	-0.356028	0.356028	0.00450062	0.00576033	0.00625279	0.00638507	0.964287	19144383
Dok2	0.71028	-0.355887	0.355887	0.00879365	0.0112539	0.0142921	0.0152259	0.820624	1.91369e+07
Tmem229a	0.138478	-0.355674	0.355674	0.00655689	0.00839008	0.0100491	0.0135069	0.264881	1.91142e+07
Fan1	0.000113551	-0.354813	0.354813	0.0446999	0.0571631	0.0578383	0.0790766	0.000693926	1.89538e+07
Jade3	0.014401	-0.354633	0.354633	0.023344	0.029849	0.034167	0.0444499	0.0442186	1.90521e+07
Car8	0.100652	-0.354624	0.354624	0.00667857	0.00853957	0.011389	0.0154715	0.208036	1.91085e+07
Map1a	5.18982e-06	-0.354603	0.354603	0.0710761	0.0908803	0.0980348	0.129666	4.43189e-05	18860055
Adam19	9.37879e-06	-0.35405	0.35405	0.0844181	0.107898	0.11456	0.146857	7.60999e-05	1.88506e+07
Idi1	2.08074e-05	-0.353948	0.353948	0.0933207	0.119269	0.112104	0.142927	0.000155633	18865241
Pde1c	0.0253908	-0.353529	0.353529	0.0225804	0.0288506	0.0236713	0.0316798	0.0700844	19073522
2610027K06Rik	2.81634e-05	-0.353437	0.353437	0.0493045	0.0629915	0.0578383	0.081778	0.000202945	1.89356e+07
Nptxr	0.000702334	-0.353359	0.353359	0.0449012	0.0573627	0.0656543	0.0849705	0.00342451	18969449
Ccdc134	0.000921108	-0.352813	0.352813	0.0440195	0.056215	0.065431	0.0842338	0.00432438	1.89739e+07
Ace	0.617614	-0.352213	0.352213	0.01035	0.013212	0.0158553	0.0171906	0.753019	19133135
Adm	0.0119231	-0.35204	0.35204	0.030031	0.0383304	0.0381867	0.0493615	0.0378455	19044383
Dok6	3.11453e-19	-0.35183	0.35183	0.455361	0.581121	0.373828	0.473723	1.65854e-17	1.82281e+07
Zfp874b	0.00718708	-0.351671	0.351671	0.0446439	0.0569673	0.0567218	0.0709725	0.0248278	19016167
Homer1	0.000271049	-0.351617	0.351617	0.0504107	0.0643235	0.0750335	0.0972495	0.00148638	1.89443e+07
Epas1	9.26188e-10	-0.351344	0.351344	0.219401	0.2799	0.205672	0.264489	1.59229e-08	18628191
Slc9a3r2	8.86e-07	-0.35119	0.35119	0.101838	0.129906	0.126842	0.165766	8.95578e-06	1.88022e+07
Cntrob	0.000538236	-0.350649	0.350649	0.0593141	0.0756335	0.0853059	0.107318	0.0027054	18944247
Gm15860	0.00711835	-0.35055	0.35055	0.0322022	0.0410593	0.0408665	0.0532908	0.0246306	19033438
Lcorl	1.00833e-08	-0.350492	0.350492	0.131093	0.167143	0.165476	0.215128	1.48434e-07	18699471
Nos3	0.157595	-0.35048	0.35048	0.00961332	0.0122568	0.0158553	0.0198919	0.290995	1.91088e+07
Cenpe	0.171402	-0.350332	0.350332	0.0606369	0.0773032	0.0596248	0.0663065	0.309174	19080128
Dip2b	3.86957e-12	-0.350261	0.350261	0.210132	0.267875	0.249665	0.319008	9.45561e-11	18517157
Zfp46	7.72501e-06	-0.34991	0.34991	0.0735913	0.0937908	0.102054	0.133595	6.3688e-05	18861041
Micu2	8.37722e-16	-0.349655	0.349655	0.232255	0.295952	0.274676	0.361248	3.27621e-14	18389221
Tnfrsf13c	0.433405	-0.349544	0.349544	0.00267035	0.00340245	0.00379634	0.00491159	0.595822	19135536
Zfp58	0.000158037	-0.349435	0.349435	0.0475375	0.0605657	0.0634212	0.0852161	0.000925381	18950477
Gm38037	0.913034	-0.349375	0.349375	0.00542937	0.00691706	0.0122823	0.0125246	0.952669	1.91433e+07
9930012K11Rik	0.0393568	-0.348873	0.348873	0.0121264	0.0154437	0.0189817	0.0255403	0.100025	19085873
4930579K19Rik	1.68997e-05	-0.34881	0.34881	0.0433953	0.0552644	0.0587316	0.0830059	0.000129552	1.89283e+07
4933431E20Rik	0.00138396	-0.348779	0.348779	0.0433321	0.0551827	0.0591782	0.0766208	0.00615602	18987168
Aldh7a1	1.90843e-16	-0.34871	0.34871	0.269213	0.342822	0.30862	0.402014	7.92092e-15	1.83448e+07
Brinp1	5.64054e-07	-0.348421	0.348421	0.126311	0.160815	0.122823	0.161591	5.97354e-06	1.88003e+07
Slc12a6	1.23046e-11	-0.348075	0.348075	0.181925	0.231565	0.208575	0.274804	2.83876e-10	18567001
4930461C15Rik	0.658706	-0.347918	0.347918	0.00125621	0.0015988	0.0015632	0.00196464	0.781358	19142039
D5Ertd605e	0.757202	-0.347648	0.347648	0.000854116	0.00108685	0.00200983	0.00171906	0.85337	1.91483e+07
Azi2	1.20803e-14	-0.347557	0.347557	0.241865	0.30775	0.287405	0.371562	4.14105e-13	18412080
Cntd1	0.446328	-0.347557	0.347557	0.00488628	0.00621732	0.0080393	0.0095776	0.607329	19131668
Dhrs11	0.0988847	-0.347129	0.347129	0.00893541	0.0113661	0.015632	0.0203831	0.205338	19102492
Ctla2b	0.323969	-0.347001	0.347001	0.00797499	0.0101435	0.0107191	0.0130157	0.485023	19124648
Maf	6.40778e-21	-0.346997	0.346997	0.50052	0.636616	0.333408	0.44278	3.9602e-19	1.82084e+07
Tmem108	0.00131985	-0.346947	0.346947	0.0455604	0.0579467	0.0511389	0.06778	0.00590654	18996113
Nrep	5.63712e-21	-0.346745	0.346745	0.408225	0.519135	0.38812	0.499754	3.50952e-19	18172458
Slc38a4	0.179565	-0.346699	0.346699	0.0171342	0.0217886	0.0261277	0.030943	0.320213	1.91017e+07
Gm3854	0.179791	-0.346658	0.346658	0.00899716	0.0114409	0.014962	0.018664	0.320554	19111724
Fgf7	0.58274	-0.346401	0.346401	0.0203963	0.0259315	0.0285842	0.0304519	0.723946	1.91273e+07
Erich1	7.37736e-08	-0.346365	0.346365	0.105586	0.134237	0.138901	0.183448	9.213e-07	1.87541e+07
Gm49970	0.000917645	-0.346214	0.346214	0.024838	0.0315746	0.0276909	0.0410118	0.00431291	19027005
Nudt14	2.87113e-09	-0.346172	0.346172	0.144684	0.18392	0.189594	0.245088	4.60851e-08	18658394
Trim2	7.95777e-20	-0.345976	0.345976	0.378028	0.480478	0.368468	0.481336	4.55259e-18	18212368
Fam228b	4.90985e-06	-0.345866	0.345866	0.0680722	0.0865139	0.0835194	0.113949	4.21406e-05	18877020
C8g	0.104986	-0.345685	0.345685	0.0131958	0.0167686	0.0198749	0.0250491	0.214377	19098383
Slc8a3	0.0223389	-0.34563	0.34563	0.025241	0.0320738	0.0332738	0.0427308	0.0631391	1.90597e+07
Ddah1	0.000109389	-0.345569	0.345569	0.0351817	0.0447037	0.0433229	0.0623772	0.000670914	18975404
Ppp1r1a	0.446186	-0.345542	0.345542	0.0031011	0.00394035	0.00602948	0.00736739	0.607324	19133449
Bmp2k	1.46442e-08	-0.345509	0.345509	0.111333	0.14146	0.141358	0.188114	2.07866e-07	18729675
Cend1	0.00137468	-0.345252	0.345252	0.0386977	0.0491605	0.046226	0.0621316	0.00612278	1.90031e+07
F7	0.158452	-0.345235	0.345235	0.00143308	0.00182053	0.00133988	0.00270138	0.292005	19133285
Gm8066	0.15605	-0.345155	0.345155	0.00270453	0.00343553	0.00357302	0.00564833	0.288929	19126817
Tspan18	1.50857e-08	-0.345122	0.345122	0.148998	0.189266	0.162573	0.213163	2.13418e-07	18707125
Tpm2	4.93519e-39	-0.344988	0.344988	0.866388	1.10043	0.615453	0.735756	8.11383e-37	1.76823e+07
Neurl3	0.498725	-0.344859	0.344859	0.00276135	0.00350699	0.00491291	0.00392927	0.654024	19154574
F5	0.147719	-0.344812	0.344812	0.00539518	0.0068518	0.00759268	0.0105599	0.277694	19118687
2810032G03Rik	0.00394258	-0.344706	0.344706	0.0255238	0.0324124	0.031264	0.043222	0.0150098	1.90383e+07
Col25a1	5.56294e-14	-0.344696	0.344696	0.2805	0.356202	0.256811	0.338409	1.74041e-12	18454460
Gm34680	0.165289	-0.344689	0.344689	0.00242287	0.00307675	0.00245645	0.00417485	0.300645	1.913e+07
Serp2	1.20078e-05	-0.344683	0.344683	0.0729645	0.0926556	0.0955784	0.125982	9.53303e-05	18874594
Epm2a	0.0305305	-0.344496	0.344496	0.0250754	0.0318384	0.0372934	0.0466601	0.0814179	19060235
Gpt	0.123526	-0.344256	0.344256	0.0177718	0.0225613	0.027021	0.0326621	0.24313	1.90941e+07
Art4	0.0575832	-0.344243	0.344243	0.0234653	0.0297888	0.0303707	0.0378193	0.135621	19077811
Gm4890	0.132484	-0.344054	0.344054	0.0180699	0.0229364	0.0294774	0.0351179	0.256041	19093275
Sema3d	0.000346674	-0.343854	0.343854	0.0653674	0.0829606	0.0665476	0.0874263	0.00183439	18957753
Tceanc2	9.31857e-10	-0.343527	0.343527	0.132857	0.168576	0.166816	0.22225	1.60041e-08	1.86649e+07
Dhx29	5.28489e-09	-0.343525	0.343525	0.119995	0.152256	0.159669	0.209971	8.12108e-08	18696359
Gm45495	0.0655135	-0.343513	0.343513	0.00562937	0.00714279	0.00826262	0.012279	0.14998	19109195
Lipg	0.662126	-0.3433	0.3433	0.00150315	0.00190698	0.00223314	0.00270138	0.781358	19141418
Rln1	0.483024	-0.343278	0.343278	0.00946416	0.0120066	0.0125056	0.0142436	0.640276	1.91298e+07
Larp1b	0.0135675	-0.342654	0.342654	0.0420666	0.0533441	0.0645377	0.0780943	0.0420637	19020411
Specc1	7.86148e-07	-0.342197	0.342197	0.152974	0.193923	0.178874	0.221267	8.0585e-06	18753142
Slc25a43	0.649623	-0.342022	0.342022	0.00258741	0.00327962	0.00401965	0.00466601	0.776997	19139801
Tbcb	1.91885e-26	-0.342007	0.342007	0.4874	0.617789	0.486378	0.604862	1.7102e-24	1.79921e+07
Inpp5f	1.97072e-07	-0.341898	0.341898	0.134185	0.170069	0.174185	0.219057	2.27797e-06	18735108
Cfap74	0.11509	-0.341786	0.341786	0.00580149	0.00735237	0.0102724	0.013998	0.230262	19111748
A830011K09Rik	0.520571	-0.34166	0.34166	0.00170711	0.00216327	0.00245645	0.00319253	0.672311	1.9139e+07
A430033K04Rik	0.000657589	-0.34119	0.34119	0.0435046	0.0551116	0.0609647	0.0800589	0.00322959	18973860
Nap1l5	0.00810072	-0.340661	0.340661	0.0495851	0.0627914	0.0625279	0.0768664	0.0274191	1.90128e+07
Gm35439	0.658268	-0.340618	0.340618	0.000952004	0.00120552	0.0015632	0.00196464	0.781358	19142034
Gm47920	0.164184	-0.340267	0.340267	0.00467095	0.00591338	0.00602948	0.00859528	0.299149	1.91224e+07
Il23a	0.376325	-0.34021	0.34021	0.00957954	0.0121271	0.011389	0.0135069	0.539721	1.91264e+07
Tsga10	1.20944e-05	-0.340205	0.340205	0.0864277	0.109412	0.107861	0.139489	9.58833e-05	1.88612e+07
Slc26a8	0.528022	-0.340063	0.340063	0.00234013	0.00296216	0.00290308	0.00368369	0.678038	1.91386e+07
Gm36684	0.368117	-0.339962	0.339962	0.00319853	0.00404845	0.00535954	0.00687623	0.532475	19131873
Gm41409	0.941677	-0.339576	0.339576	0.000752318	0.000951972	0.00178651	0.00171906	0.969327	19146294
Pus10	8.04008e-07	-0.339491	0.339491	0.0715112	0.0904839	0.0964716	0.131631	8.21225e-06	1.88363e+07
Rell1	6.60074e-10	-0.339484	0.339484	0.142159	0.179874	0.179321	0.235511	1.16313e-08	1.86481e+07
Npc1	1.83818e-11	-0.33938	0.33938	0.165554	0.209462	0.190487	0.255157	4.14484e-10	1.85893e+07
Zc2hc1c	0.226401	-0.339203	0.339203	0.00476203	0.00602425	0.00848593	0.0110511	0.378131	19122271
Phtf2	6.57329e-14	-0.33915	0.33915	0.259191	0.327879	0.26887	0.349214	2.03124e-12	18447637
Nudt17	0.00701493	-0.339084	0.339084	0.0215382	0.0272448	0.0299241	0.0407662	0.0243175	1.90477e+07
Ifitm1	1.45002e-32	-0.338901	0.338901	1.50624	1.90509	0.693613	0.748281	1.80549e-30	17806157
Crot	1.44469e-14	-0.338816	0.338816	0.225633	0.285362	0.259044	0.344057	4.92243e-13	1.84353e+07
Rpl39l	3.45762e-09	-0.338767	0.338767	0.181522	0.229567	0.181331	0.236248	5.49262e-08	18668404
Gm5784	0.105531	-0.33865	0.33865	0.00898403	0.011361	0.0125056	0.0166994	0.215109	19107482
Gm15972	0.192309	-0.33859	0.33859	0.00626064	0.0079167	0.00893256	0.0117878	0.336179	19119708
Myl9	7.51895e-18	-0.338476	0.338476	0.540794	0.683791	0.377847	0.478143	3.58665e-16	18262452
Creb5	1.722e-09	-0.338456	0.338456	0.166063	0.209971	0.170389	0.225688	2.83661e-08	1.86693e+07
Nsmce2	4.4922e-11	-0.338034	0.338034	0.194526	0.245887	0.239393	0.30501	9.60492e-10	18558305
Gm12043	0.117049	-0.338015	0.338015	0.00301404	0.00380979	0.00357302	0.00589391	0.233272	19124573
Fadd	0.00196642	-0.337899	0.337899	0.0576693	0.0728891	0.0835194	0.102652	0.00826081	1.89682e+07
Mkrn2	9.5737e-09	-0.337586	0.337586	0.133356	0.168514	0.174185	0.225688	1.41344e-07	1.86899e+07
Platr1	0.447	-0.337585	0.337585	0.00154372	0.0019507	0.00334971	0.0024558	0.607845	19153796
Gm47467	0.124365	-0.337285	0.337285	0.00899135	0.0113595	0.0118356	0.0157171	0.244344	1.91104e+07
Gdf7	0.335177	-0.337266	0.337266	0.00173456	0.00219137	0.00334971	0.00466601	0.497711	1.91337e+07
Npnt	9.19359e-06	-0.337173	0.337173	0.134742	0.170216	0.125279	0.159627	7.46687e-05	1.88392e+07
Zfp982	5.1781e-05	-0.336984	0.336984	0.0467372	0.0590343	0.057615	0.0803045	0.000346408	1.89438e+07
Gm26512	0.0859603	-0.336928	0.336928	0.00975019	0.0123151	0.0118356	0.0162083	0.185127	19105971
Crnde	0.00056908	-0.336727	0.336727	0.0586768	0.0741023	0.0748102	0.0960216	0.00284355	1.89558e+07
Thbs2	4.13101e-06	-0.33618	0.33618	0.229748	0.290037	0.173292	0.212917	3.61149e-05	1.87848e+07
Nrp2	1.82911e-09	-0.33615	0.33615	0.293818	0.370911	0.263287	0.319253	3.00137e-08	1.85966e+07
Gm46658	0.143106	-0.336142	0.336142	0.00731683	0.00923659	0.0109424	0.0144892	0.270827	1.91134e+07
Rb1	2.94474e-08	-0.335836	0.335836	0.13187	0.166434	0.163019	0.211444	3.96411e-07	1.87166e+07
Ttll7	0.00646332	-0.335647	0.335647	0.0212974	0.0268762	0.0332738	0.0446955	0.0227027	19041938
Phex	0.00260917	-0.33561	0.33561	0.0689531	0.0870127	0.0388566	0.052554	0.0105829	19021937
Wdr60	5.60984e-11	-0.335561	0.335561	0.212171	0.267732	0.247432	0.31336	1.18303e-09	1.85551e+07
Fcrls	0.0555704	-0.335341	0.335341	0.0108699	0.0137143	0.0111657	0.0159627	0.131813	19102148
Iqck	0.13922	-0.335285	0.335285	0.0134186	0.0169293	0.0198749	0.024558	0.265669	19102761
Rmdn1	4.23374e-09	-0.335283	0.335283	0.151063	0.190585	0.188924	0.243615	6.63834e-08	18664551
Fam98b	7.95405e-16	-0.335248	0.335248	0.272425	0.343689	0.319339	0.409136	3.12515e-14	18355615
Mme	2.0851e-22	-0.335138	0.335138	0.46079	0.581286	0.42251	0.53389	1.46511e-20	18118882
Cfhr2	0.533847	-0.335047	0.335047	0.00288347	0.00363726	0.00357302	0.00442043	0.681581	19137958
Xkr6	0.0812109	-0.334959	0.334959	0.0207076	0.0261194	0.0330505	0.0400295	0.177357	19081220
Zmym6	2.43364e-06	-0.334938	0.334938	0.0749092	0.0944847	0.0920054	0.124754	2.25692e-05	1.88567e+07
Fam169b	0.643915	-0.334821	0.334821	0.00221578	0.00279459	0.00446628	0.00515717	0.772899	19139384
Gm42941	0.000969133	-0.334689	0.334689	0.0479682	0.0604929	0.0556052	0.0734283	0.00452601	18986030
Srgn	0.0148584	-0.334463	0.334463	0.0340316	0.0429107	0.0388566	0.0496071	0.0453682	19047047
Srpx	9.47158e-10	-0.334388	0.334388	0.199948	0.252103	0.211478	0.270629	1.62504e-08	18623613
Ube2h	4.43244e-21	-0.334326	0.334326	0.407385	0.513626	0.417374	0.533644	2.81119e-19	18153526
Slco1c1	0.13514	-0.334205	0.334205	0.0023786	0.00299866	0.00290308	0.00491159	0.260002	19127397
Bphl	3.30137e-17	-0.333841	0.333841	0.332038	0.418489	0.362215	0.459725	1.47898e-15	18289315
Il27ra	0.202823	-0.333841	0.333841	0.00719683	0.00907063	0.011389	0.0144892	0.349507	1.91174e+07
Trpm3	0.00902008	-0.33384	0.33384	0.0296152	0.0373259	0.0308173	0.0415029	0.0299502	1.90497e+07
Dazl	0.155534	-0.333831	0.333831	0.00155497	0.00195981	0.00223314	0.00392927	0.288322	19130249
Gnai1	5.6425e-16	-0.333828	0.333828	0.314797	0.396755	0.338767	0.433939	2.24296e-14	18337721
Fbxo47	0.662052	-0.333741	0.333741	0.00125665	0.00158372	0.00223314	0.00270138	0.781358	19141417
Gm13594	2.73298e-05	-0.333517	0.333517	0.0654138	0.0824267	0.0707905	0.0970039	0.000197936	18916579
Mtmr2	3.45791e-11	-0.333511	0.333511	0.184999	0.233113	0.229567	0.296169	7.5265e-10	18562195
Tjp1	3.46661e-12	-0.333378	0.333378	0.248581	0.313202	0.286065	0.361984	8.5829e-11	1.84876e+07
Ralb	3.67081e-14	-0.333375	0.333375	0.229313	0.288924	0.26753	0.349705	1.18629e-12	18440913
Idua	0.000228227	-0.333204	0.333204	0.0369194	0.0465113	0.0473426	0.0660609	0.00127804	1.89779e+07
Astn2	0.0226839	-0.332966	0.332966	0.0189188	0.0238301	0.027021	0.035609	0.0639683	19067565
Gm16185	0.528196	-0.332687	0.332687	0.00194686	0.00245179	0.00290308	0.00368369	0.678125	1.91386e+07
Gm28535	0.321287	-0.332415	0.332415	0.00180885	0.00227756	0.00290308	0.00417485	0.482201	1.91341e+07
Snx6	3.45331e-27	-0.332174	0.332174	0.548337	0.690307	0.522555	0.648084	3.2853e-25	1.79603e+07
Myo6	1.87945e-20	-0.332147	0.332147	0.439128	0.552812	0.42452	0.533644	1.10127e-18	18167853
Skap2	0.0900409	-0.332047	0.332047	0.0135367	0.01704	0.0194283	0.0248035	0.19148	19096604
Ggt5	0.648058	-0.331788	0.331788	0.0199299	0.0250832	0.0272443	0.0287328	0.776057	19130831
Tnnc1	0.324549	-0.331722	0.331722	0.00485952	0.00611578	0.00915587	0.0112967	0.485677	19126168
Nme3	0.000167414	-0.331651	0.331651	0.0461903	0.0581283	0.0629745	0.084725	0.000972448	18951791
D430042O09Rik	2.92704e-11	-0.331596	0.331596	0.227489	0.286273	0.254578	0.323674	6.41223e-10	18540067
Stbd1	9.18385e-09	-0.331532	0.331532	0.180559	0.227207	0.194953	0.248281	1.36301e-07	1.86707e+07
Akap6	0.0573926	-0.331476	0.331476	0.0129705	0.0163208	0.0196516	0.0257859	0.135304	19089954
Wdr89	4.64686e-27	-0.331155	0.331155	0.626646	0.788333	0.540866	0.628684	4.29999e-25	17963211
Gm44672	0.53312	-0.331134	0.331134	0.00481616	0.00605874	0.00625279	0.00736739	0.681137	19135588
Usp28	5.54867e-05	-0.331095	0.331095	0.063583	0.0799853	0.0902188	0.117141	0.000368048	1.89032e+07
Avpi1	9.44873e-16	-0.330662	0.330662	0.320147	0.402613	0.336534	0.430255	3.67827e-14	1.83458e+07
Txnl4b	0.0403588	-0.330498	0.330498	0.0153356	0.0192837	0.0250112	0.0324165	0.10207	19078286
Ppp2r5a	3.88996e-23	-0.330429	0.330429	0.488363	0.614061	0.469406	0.586935	2.96723e-21	1.80785e+07
Gm15663	0.0177725	-0.330399	0.330399	0.0257111	0.0323281	0.0424297	0.0532908	0.0524045	19046004
Gm14326	0.000189337	-0.330284	0.330284	0.0516981	0.064998	0.0743636	0.0972495	0.00108551	18939594
Harbi1	0.00256139	-0.330283	0.330283	0.052917	0.0665304	0.0750335	0.0930747	0.010414	1.89806e+07
[truncated: 14,935 more rows]

## Sheet: Tup
gene	p_val	avg_log2FC	abs_log2FC	avg_1_KO	avg_2_WT	pct_1_KO	pct_2_WT	p_val_adj	stats
Ddx3y	5.09342e-228	Inf	Inf	0.213272	0	0.226217	0	2.1563e-224	21208157
Eif2s3y	1.40409e-214	Inf	Inf	0.194394	0	0.214158	0	4.75536e-211	21098213
Uty	7.63179e-157	Inf	Inf	0.137052	0	0.160563	0	1.29237e-153	20609573
Bst2	7.9702e-148	1.59687	1.59687	0.578799	0.191348	0.445735	0.212426	1.22698e-144	21624652
Ly6e	1.55386e-119	1.70045	1.70045	0.451269	0.138851	0.378517	0.179764	2.02409e-116	21253456
Ftl1	4.71703e-117	0.266199	0.266199	2.07027	1.72145	0.948861	0.910363	5.70559e-114	21766943
Isg15	2.06987e-110	1.81894	1.81894	0.40418	0.114556	0.297678	0.109528	1.94729e-107	20951214
Kdm5d	8.27007e-100	6.65202	6.65202	0.084721	0.000842429	0.107191	0.000982318	6.3657e-97	20113812
H2-D1	7.63142e-87	0.86055	0.86055	0.852041	0.469255	0.591782	0.457515	4.45622e-84	21275465
B2m	1.99365e-77	0.579134	0.579134	1.01296	0.678041	0.694283	0.609774	9.75652e-75	2.12244e+07
Gapdh	1.5209e-70	0.275553	0.275553	1.48493	1.22675	0.862215	0.81164	6.2817e-68	2.11655e+07
Lgals3bp	1.04045e-64	0.957183	0.957183	0.454169	0.233925	0.416927	0.270874	3.6706e-62	20790949
Sostdc1	1.70159e-64	0.862228	0.862228	0.84252	0.463473	0.479008	0.325147	5.88057e-62	20863868
H2-K1	4.66396e-61	0.963264	0.963264	0.564547	0.289554	0.448638	0.318271	1.51883e-58	20793739
Zbtb20	2.80744e-58	0.341039	0.341039	1.31792	1.04046	0.80527	0.758595	8.34057e-56	2.09708e+07
Oasl2	1.12625e-57	1.5165	1.5165	0.237421	0.0829865	0.221751	0.0997053	3.28826e-55	20321097
Ifi27l2a	1.79584e-51	1.71084	1.71084	0.219968	0.0671965	0.173292	0.0687623	4.47217e-49	2.0129e+07
Ifi27	3.48179e-51	0.670241	0.670241	0.660525	0.415075	0.509156	0.386788	8.54502e-49	20712716
Rtp4	4.1731e-51	1.59585	1.59585	0.155096	0.0513099	0.159	0.0579568	1.00953e-48	20080017
Ifi44l	1.38949e-50	2.22447	2.22447	0.114524	0.0245055	0.119696	0.0336444	3.26801e-48	1.99418e+07
Dlk1	5.44927e-48	1.17246	1.17246	0.515451	0.228687	0.301921	0.181483	1.15347e-45	2.0397e+07
Ntrk3	5.69871e-45	0.996703	0.996703	0.40796	0.204447	0.307503	0.188851	1.13532e-42	20367034
Ifit1	2.20411e-42	1.74708	1.74708	0.115878	0.0345204	0.104064	0.0294695	4.10045e-40	1.98269e+07
Eda2r	1.64747e-38	4.31914	4.31914	0.034941	0.00175043	0.0475659	0.00270138	2.68252e-36	1.9555e+07
Gm34030	2.07136e-37	0.442245	0.442245	0.756191	0.556548	0.605851	0.532171	3.27817e-35	20543880
Plppr1	2.96499e-36	0.681498	0.681498	0.510794	0.318489	0.411344	0.311149	4.36602e-34	20380485
Dlx6os1	4.44112e-35	0.609506	0.609506	0.697376	0.457075	0.461813	0.359283	6.26716e-33	2.04038e+07
Gm17167	1.75213e-34	6.23942	6.23942	0.0349429	0.000462492	0.0375167	0.000491159	2.43202e-32	19483248
Cdkn1a	3.48929e-34	0.854974	0.854974	0.493168	0.27266	0.307057	0.202849	4.72701e-32	2.02135e+07
H2-Q7	1.29434e-31	2.9006	2.9006	0.0600283	0.00803873	0.0638678	0.0144892	1.53276e-29	19600329
Id1	1.79779e-31	0.312876	0.312876	1.1381	0.916207	0.718401	0.641208	2.11415e-29	2.04544e+07
Id2	8.51896e-30	0.278391	0.278391	1.19821	0.987934	0.747879	0.717092	9.36754e-28	20425756
Cox6b2	2.6293e-29	0.629258	0.629258	0.511211	0.330502	0.442832	0.365422	2.85414e-27	2.02846e+07
Mmp2	3.77244e-29	0.280692	0.280692	1.10599	0.91045	0.721527	0.674607	4.0432e-27	20405646
Psrc1	4.23841e-28	1.19507	1.19507	0.129994	0.0567768	0.143814	0.0709725	4.24693e-26	19823768
Usp18	3.50813e-27	1.73292	1.73292	0.0734725	0.0221036	0.0772666	0.0252947	3.30037e-25	19621479
Ccnd1	3.50005e-27	0.570278	0.570278	0.528164	0.355711	0.401742	0.308448	3.30037e-25	20200641
Irf7	5.14285e-27	1.71739	1.71739	0.0939698	0.028576	0.0962483	0.038556	4.70752e-25	1.96839e+07
Ecel1	2.20211e-26	1.77548	1.77548	0.124501	0.0363664	0.0937919	0.0373281	1.93215e-24	1.96704e+07
Coch	6.14297e-26	1.24876	1.24876	0.180472	0.0759444	0.144484	0.0746562	5.3074e-24	1.9801e+07
Eif4a2	1.18036e-24	0.247312	0.247312	0.94477	0.795936	0.725547	0.689587	9.89512e-23	2.02995e+07
Gm4951	1.79042e-24	1.26379	1.26379	0.119509	0.0497694	0.11121	0.0510806	1.47897e-22	19701195
Gria3	2.00038e-24	0.390316	0.390316	0.664522	0.507006	0.555605	0.481582	1.64439e-22	20242261
Phlda3	2.13001e-24	0.598347	0.598347	0.481004	0.317708	0.421393	0.353389	1.73412e-22	2.01665e+07
Zfp36l1	5.16996e-24	0.266227	0.266227	1.07366	0.892742	0.713265	0.695727	4.1889e-22	20282824
Bmp4	9.55888e-24	0.438722	0.438722	0.652732	0.481578	0.499777	0.428291	7.59953e-22	2.01999e+07
Hsd11b2	1.17736e-23	1.31036	1.31036	0.141083	0.0568878	0.117017	0.0567289	9.31653e-22	19708115
Ano3	7.28757e-23	5.38925	5.38925	0.0222405	0.000530664	0.0267977	0.0012279	5.41262e-21	19378970
Krt18	1.00555e-22	1.29073	1.29073	0.130095	0.0531756	0.102054	0.0466601	7.30818e-21	19658534
Zmat3	1.24697e-22	1.14829	1.14829	0.149852	0.0676072	0.173962	0.105845	8.94757e-21	19822005
Ephx1	3.2752e-22	1.4168	1.4168	0.0704725	0.0263949	0.0812863	0.0324165	2.24544e-20	19593255
Lypd1	4.88855e-22	1.03652	1.03652	0.234002	0.114077	0.129969	0.06778	3.31131e-20	19719255
H2-T23	8.5198e-22	0.719144	0.719144	0.306705	0.18631	0.291871	0.215128	5.70254e-20	1.99836e+07
Amelx	5.05167e-21	0.228607	0.228607	0.788678	0.673104	0.543323	0.388016	3.16833e-19	2.01348e+07
Cped1	5.73207e-21	0.393617	0.393617	0.689876	0.525146	0.548682	0.502456	3.55556e-19	20158222
Apod	1.01134e-20	0.93495	0.93495	0.526392	0.275335	0.303707	0.236248	6.16046e-19	1.99791e+07
Shisa2	1.48817e-20	0.627298	0.627298	0.439777	0.284707	0.333631	0.257367	8.96819e-19	20001792
Xaf1	1.57876e-20	0.850793	0.850793	0.177388	0.0983581	0.180214	0.112721	9.38058e-19	1.97997e+07
Gm21860	4.97693e-20	1.95463	1.95463	0.0439155	0.0113296	0.0502456	0.0147348	2.87643e-18	1.94705e+07
Ifi44	1.05617e-19	2.98722	2.98722	0.0296609	0.00374059	0.0317106	0.00491159	5.88329e-18	19390202
Cd24a	1.09783e-19	0.391552	0.391552	0.826926	0.630374	0.519875	0.466601	6.09531e-18	20111427
Fcrl6	6.40725e-19	1.1645	1.1645	0.111533	0.0497571	0.112997	0.0599214	3.28789e-17	19642614
H2-Q4	1.87034e-18	1.48964	1.48964	0.0715744	0.0254878	0.0824029	0.0378193	9.28808e-17	19560661
Dlx1	1.86809e-18	0.627852	0.627852	0.34331	0.222169	0.319116	0.248035	9.28808e-17	19941775
Phf11d	2.18029e-18	1.82322	1.82322	0.0454037	0.0128306	0.0493524	0.0154715	1.07641e-16	19455242
Irf2bp2	4.42476e-18	0.312562	0.312562	0.619439	0.498779	0.551362	0.507122	2.16557e-16	20081077
Irf9	1.14935e-17	0.742395	0.742395	0.196003	0.11716	0.211478	0.145383	5.40639e-16	1.97991e+07
Foxd1	1.72805e-17	1.01162	1.01162	0.168405	0.0835267	0.144931	0.0884086	7.97353e-16	19689223
Osr2	2.3403e-17	0.517154	0.517154	0.479769	0.335238	0.408218	0.352652	1.074e-15	1.999e+07
Ddx60	3.63979e-17	1.64761	1.64761	0.0476827	0.0152188	0.0542653	0.0196464	1.61775e-15	19462868
Gm12216	4.07437e-17	1.47491	1.47491	0.0970497	0.0349143	0.088879	0.0444499	1.79676e-15	1.95633e+07
Zbp1	5.86364e-17	3.68244	3.68244	0.0194665	0.00151622	0.0232247	0.0024558	2.55257e-15	19335190
Pappa	6.41592e-17	0.676837	0.676837	0.251965	0.157613	0.236266	0.170187	2.7787e-15	1.98174e+07
Igfbp3	6.77383e-17	0.555129	0.555129	0.920562	0.626531	0.376731	0.31164	2.91878e-15	19953375
4833427G06Rik	7.14274e-17	5.66031	5.66031	0.012779	0.000252681	0.0183117	0.000491159	3.06993e-15	19308189
Fgf10	1.036e-16	1.00751	1.00751	0.130695	0.0650084	0.126619	0.074165	4.36407e-15	1.96418e+07
Nell1	2.02756e-16	1.08863	1.08863	0.113073	0.0531677	0.102278	0.0550098	8.3743e-15	1.95859e+07
F830016B08Rik	2.42838e-16	1.59847	1.59847	0.0544345	0.0179757	0.0560518	0.021611	9.9329e-15	1.94616e+07
AC160336.1	3.43371e-16	1.24183	1.24183	0.0909032	0.0384372	0.108307	0.0609037	1.39775e-14	1.95972e+07
Glipr1	3.48518e-16	1.56827	1.56827	0.0661899	0.0223201	0.0728004	0.0336444	1.4153e-14	19510278
Hspe1-rs1	3.81806e-16	2.73977	2.73977	0.029916	0.0044787	0.0381867	0.0108055	1.54677e-14	19397472
Gbp6	6.09015e-16	1.83837	1.83837	0.0352527	0.00985799	0.0386333	0.0110511	2.41524e-14	19397413
Dlx2	9.26985e-16	0.474962	0.474962	0.409827	0.294865	0.389013	0.331532	3.61695e-14	19933620
Cdk2ap1	9.80211e-16	0.337386	0.337386	0.487622	0.38594	0.476775	0.427308	3.80708e-14	1.99828e+07
Dlx5	1.07408e-15	0.274835	0.274835	0.716634	0.59233	0.582626	0.547151	4.15262e-14	2.00214e+07
Sall3	1.08652e-15	0.81307	0.81307	0.175373	0.0998171	0.172622	0.116159	4.19116e-14	19706458
Lmo4	1.4525e-15	0.234848	0.234848	0.964256	0.8194	0.689147	0.666257	5.55229e-14	20040148
Krt8	1.73187e-15	1.14817	1.14817	0.0910435	0.0410787	0.0788298	0.0383104	6.59043e-14	1.95177e+07
Ssbp4	2.48751e-15	0.3864	0.3864	0.442909	0.338841	0.445735	0.393173	9.29879e-14	19955404
Meg3	3.0153e-15	0.270858	0.270858	1.08515	0.8994	0.598481	0.550098	1.11042e-13	2.001e+07
1700007K13Rik	3.45801e-15	2.90573	2.90573	0.0153234	0.00204476	0.0238946	0.00368369	1.26475e-13	1.933e+07
Sox9	5.16752e-15	0.234701	0.234701	1.06761	0.907318	0.65029	0.611984	1.85004e-13	2.00149e+07
Tgtp2	5.499e-15	1.6556	1.6556	0.0513288	0.0162921	0.0520322	0.0203831	1.9522e-13	19436852
Ifih1	1.0871e-14	1.20727	1.20727	0.061001	0.0264188	0.073247	0.0353635	3.74166e-13	1.94944e+07
Ccnd2	1.18954e-14	0.259724	0.259724	1.0138	0.846771	0.623716	0.587672	4.08593e-13	19998152
Peg3	1.54458e-14	0.232292	0.232292	1.0425	0.887463	0.665476	0.627456	5.24167e-13	2.00021e+07
Inka2	4.62769e-14	1.50482	1.50482	0.0238388	0.00840015	0.0370701	0.0115422	1.48983e-12	1.93778e+07
Ptch1	4.71131e-14	0.205164	0.205164	1.27025	1.10186	0.700536	0.681729	1.51388e-12	1.99924e+07
Ifi202b	4.86789e-14	Inf	Inf	0.00891488	0	0.0138455	0	1.55828e-12	19271921
Pmaip1	7.02915e-14	3.20605	3.20605	0.0107303	0.00116278	0.019205	0.00221022	2.16028e-12	19300647
Stat1	8.76629e-14	0.743437	0.743437	0.213357	0.127441	0.213042	0.158644	2.66514e-12	19724112
Ddit4l	1.03338e-13	0.641099	0.641099	0.249426	0.159938	0.219294	0.161346	3.10822e-12	1.9728e+07
Gm42047	2.37487e-13	1.09493	1.09493	0.0964985	0.0451765	0.102501	0.0604126	6.9338e-12	1.9544e+07
Gm2000	3.0605e-13	0.646562	0.646562	0.194233	0.124076	0.238723	0.184185	8.78414e-12	1.97405e+07
Smpd3	4.38318e-13	0.451099	0.451099	0.744827	0.54483	0.336088	0.274558	1.22889e-11	19819930
Thbs4	4.7729e-13	0.958683	0.958683	0.118088	0.0607593	0.0911121	0.0510806	1.33374e-11	1.95152e+07
Wfikkn2	5.96425e-13	0.772182	0.772182	0.185933	0.10887	0.156766	0.106582	1.64493e-11	19629921
Trpm1	6.58677e-13	1.19982	1.19982	0.0707739	0.0308099	0.0712372	0.0363458	1.80194e-11	19468334
Gbp3	1.29405e-12	1.10397	1.10397	0.0799031	0.0371736	0.0848593	0.0473969	3.38693e-11	1.94962e+07
Foxd2os	1.467e-12	0.496083	0.496083	0.393724	0.279162	0.341	0.292976	3.83366e-11	1.98124e+07
Plpp3	1.78048e-12	0.240224	0.240224	0.906011	0.767042	0.637785	0.601424	4.61019e-11	19927113
Tra2b	1.90055e-12	0.219512	0.219512	0.691317	0.593742	0.592899	0.565079	4.89117e-11	1.9918e+07
Tap1	2.15082e-12	0.805187	0.805187	0.137955	0.0789497	0.159223	0.110756	5.51012e-11	1.9623e+07
Fbln1	2.50055e-12	0.228907	0.228907	1.04992	0.895877	0.663466	0.644401	6.32004e-11	19927335
Fzd1	3.02079e-12	0.461592	0.461592	0.343602	0.249518	0.315543	0.259578	7.52439e-11	19782111
Dlx3	3.46681e-12	0.209105	0.209105	0.838838	0.725657	0.632872	0.59553	8.5829e-11	1.99158e+07
Snhg15	4.51591e-12	0.573368	0.573368	0.184308	0.123863	0.226217	0.17166	1.09874e-10	19696980
Wdfy1	6.48461e-12	0.702852	0.702852	0.160687	0.0987193	0.190933	0.140963	1.54228e-10	1.96545e+07
Igsf9	6.7676e-12	0.69156	0.69156	0.192318	0.11908	0.190264	0.140963	1.60283e-10	19653573
Twist2	7.30955e-12	0.355933	0.355933	0.577545	0.451273	0.463823	0.434185	1.72877e-10	19858647
Baiap2	8.7736e-12	0.826684	0.826684	0.1293	0.0729024	0.149174	0.103143	2.0521e-10	19596155
6330403K07Rik	1.09949e-11	0.631908	0.631908	0.234961	0.151626	0.215945	0.165766	2.5505e-10	1.9678e+07
Ifit3	1.22927e-11	1.41925	1.41925	0.0481094	0.0179884	0.0444395	0.018664	2.83876e-10	19381795
Greb1	1.40559e-11	0.757772	0.757772	0.1302	0.0770015	0.143814	0.0984774	3.22961e-10	1.95839e+07
Aen	1.44588e-11	0.636491	0.636491	0.158895	0.102213	0.201429	0.150786	3.31769e-10	1.96582e+07
Oas1a	2.50374e-11	3.30207	3.30207	0.0104553	0.00106001	0.0140688	0.0012279	5.5641e-10	1.92627e+07
Icam1	4.03862e-11	0.938281	0.938281	0.078411	0.0409191	0.100491	0.0621316	8.7232e-10	1.95042e+07
Frzb	5.56799e-11	0.505192	0.505192	0.27512	0.19384	0.27289	0.222986	1.17713e-09	1.97131e+07
Gm973	6.34408e-11	0.501674	0.501674	0.27413	0.193615	0.261054	0.210953	1.31817e-09	1.97012e+07
Bhlhe41	6.38657e-11	0.867381	0.867381	0.161404	0.0884721	0.130415	0.0886542	1.32537e-09	1.95511e+07
Ccng1	6.86353e-11	0.695943	0.695943	0.200817	0.123966	0.219741	0.174607	1.41395e-09	19663361
Piezo2	7.38e-11	0.366032	0.366032	0.512706	0.397816	0.416257	0.376965	1.51299e-09	1.98019e+07
Sesn2	1.10278e-10	0.83194	0.83194	0.0749048	0.0420795	0.100491	0.0628684	2.20999e-09	19496741
Uba7	1.10685e-10	0.701972	0.701972	0.134447	0.0826491	0.146717	0.102652	2.21553e-09	1.95693e+07
Irgm1	1.45371e-10	0.738168	0.738168	0.149392	0.0895606	0.162349	0.118369	2.86245e-09	1.95884e+07
Slc28a3	2.43534e-10	3.40751	3.40751	0.0116239	0.00109544	0.0129522	0.0012279	4.59244e-09	19252591
Mast4	2.81947e-10	0.294138	0.294138	0.496932	0.405278	0.470746	0.440079	5.25825e-09	19804406
Vit	3.65132e-10	0.348346	0.348346	0.601387	0.47238	0.42318	0.383841	6.71351e-09	1.97803e+07
Thy1	4.44877e-10	0.839679	0.839679	0.106337	0.0594179	0.107861	0.0707269	8.03151e-09	19498952
Unc5d	4.55128e-10	0.99455	0.99455	0.110723	0.055571	0.0955784	0.0609037	8.19037e-09	1.94782e+07
Mycn	5.13124e-10	0.594805	0.594805	0.172717	0.114361	0.174855	0.130403	9.1562e-09	1.95903e+07
Lmo1	5.19464e-10	0.511458	0.511458	0.215511	0.151184	0.224207	0.175589	9.24984e-09	19641458
Ly6a	5.86153e-10	1.42057	1.42057	0.0402479	0.0150351	0.0424297	0.0191552	1.04045e-08	19358820
Crlf1	6.46447e-10	0.584387	0.584387	0.22198	0.148046	0.210362	0.165766	1.14145e-08	1.96269e+07
Rspo2	6.74381e-10	0.774867	0.774867	0.121475	0.0709952	0.120813	0.0822692	1.18464e-08	19515936
Hddc3	6.81196e-10	0.534654	0.534654	0.201167	0.138871	0.237159	0.191798	1.1929e-08	19651565
Bex2	7.22342e-10	0.44063	0.44063	0.243466	0.179389	0.205226	0.154961	1.25716e-08	19617447
Col8a2	7.39677e-10	0.533731	0.533731	0.225371	0.155679	0.203439	0.15668	1.28601e-08	1.9617e+07
Mpped1	7.94301e-10	0.60283	0.60283	0.134273	0.0884136	0.14895	0.107073	1.37392e-08	1.95537e+07
Cxcl10	8.60981e-10	2.2371	2.2371	0.0250638	0.00531634	0.0232247	0.00687623	1.48622e-08	19294989
Ifi47	9.70464e-10	0.944329	0.944329	0.0940203	0.0488596	0.0984815	0.0633595	1.66166e-08	1.94768e+07
Herc6	1.04299e-09	1.00022	1.00022	0.061476	0.0307334	0.0698973	0.0400295	1.76974e-08	1.94221e+07
Tbc1d4	1.29172e-09	0.238628	0.238628	0.779502	0.660668	0.576597	0.553291	2.16146e-08	1.98084e+07
Gm11361	1.44209e-09	0.701444	0.701444	0.137887	0.0847945	0.170612	0.129175	2.3965e-08	19575186
Itgb8	1.61092e-09	1.00867	1.00867	0.0454449	0.0225864	0.0585083	0.0314342	2.6614e-08	19394298
Nfasc	1.63459e-09	0.869825	0.869825	0.10185	0.0557336	0.0935686	0.0599214	2.69525e-08	1.94645e+07
Trp53	1.80184e-09	0.246569	0.246569	0.518537	0.437074	0.498883	0.474951	2.95949e-08	19783487
Sag	2.17428e-09	0.480352	0.480352	0.331486	0.23761	0.255695	0.208006	3.53582e-08	19651001
Snai1	2.69737e-09	0.302743	0.302743	0.493908	0.400416	0.440375	0.406434	4.34194e-08	1.97557e+07
Ccl8	2.98185e-09	3.50524	3.50524	0.011373	0.00100159	0.0122823	0.00147348	4.78169e-08	19244272
Pqlc3	3.22434e-09	0.957701	0.957701	0.0594208	0.0305944	0.0848593	0.0530452	5.14619e-08	19443579
Igtp	3.60177e-09	1.00934	1.00934	0.07394	0.0367315	0.0797231	0.0491159	5.70276e-08	19433451
Slc19a2	3.71923e-09	1.18287	1.18287	0.0236027	0.0103964	0.0379634	0.016945	5.87514e-08	1.93376e+07
Avpr1a	4.94819e-09	0.988128	0.988128	0.0639881	0.0322584	0.0600715	0.0333988	7.65929e-08	1.93911e+07
Cnot3	5.17266e-09	0.22539	0.22539	0.589395	0.504147	0.547119	0.530943	7.96307e-08	1.97782e+07
Nlrc5	5.88333e-09	3.81665	3.81665	0.00853503	0.00060573	0.011389	0.0012279	8.95938e-08	1.92384e+07
Col8a1	9.03632e-09	0.521645	0.521645	0.368053	0.256378	0.207682	0.164293	1.34347e-07	1.95914e+07
H2-Q6	1.09359e-08	2.39673	2.39673	0.0110435	0.0020971	0.015632	0.00343811	1.59646e-07	19256991
Tmem243	1.27245e-08	0.378941	0.378941	0.300358	0.230976	0.313756	0.269401	1.83072e-07	1.9667e+07
Dhx58	1.29932e-08	1.51321	1.51321	0.0221689	0.00776645	0.0290308	0.0115422	1.86464e-07	19305548
Camk2d	1.36463e-08	0.338833	0.338833	0.417143	0.329827	0.404198	0.371807	1.94365e-07	1.97142e+07
Trim7	1.37837e-08	0.818838	0.818838	0.0924069	0.0523853	0.105851	0.0722004	1.96146e-07	19466591
Junb	1.50002e-08	0.421336	0.421336	0.685558	0.511929	0.443502	0.418713	2.12386e-07	1.97288e+07
Irgm2	1.64715e-08	1.10086	1.10086	0.0598659	0.0279117	0.0638678	0.0375737	2.3071e-07	19391800
Hpcal1	1.77725e-08	0.426145	0.426145	0.280475	0.208743	0.30259	0.261297	2.47704e-07	1.96558e+07
Fosb	1.90182e-08	0.502535	0.502535	0.475926	0.33594	0.313979	0.27947	2.64195e-07	19663578
Prdm16	1.95727e-08	0.703782	0.703782	0.119383	0.0732964	0.136222	0.0997053	2.71009e-07	1.95054e+07
Zfp365	2.06486e-08	0.785244	0.785244	0.0573015	0.0332494	0.0799464	0.0500982	2.84742e-07	19420207
Ino80b	2.83977e-08	0.29132	0.29132	0.441847	0.361057	0.435462	0.403487	3.83177e-07	1.97135e+07
Psmb8	3.24507e-08	0.375077	0.375077	0.361621	0.278833	0.339661	0.302554	4.33717e-07	1.96684e+07
Gli3	3.3497e-08	0.291786	0.291786	0.404197	0.330185	0.409781	0.37279	4.46077e-07	19699981
Podn	3.80462e-08	1.2789	1.2789	0.0138295	0.00569927	0.0189817	0.00564833	5.00991e-07	1.9267e+07
Rnf213	3.83541e-08	0.622363	0.622363	0.131133	0.085185	0.14828	0.111002	5.04653e-07	19512584
Etv1	3.85113e-08	0.689686	0.689686	0.0804692	0.04989	0.0940152	0.0623772	5.06328e-07	19438707
Gulo	3.92811e-08	1.52793	1.52793	0.0264188	0.00916135	0.0285842	0.0117878	5.14607e-07	1.92997e+07
Slfn8	4.03853e-08	2.09654	2.09654	0.0109978	0.0025715	0.0167485	0.00442043	5.27282e-07	19258104
Gm15987	4.3473e-08	2.81289	2.81289	0.0095521	0.00135936	0.0125056	0.00221022	5.64983e-07	19239601
Pdlim3	4.63128e-08	1.17754	1.17754	0.0785396	0.0347228	0.0627512	0.0375737	6.00507e-07	19382638
Tfap2a	4.835e-08	0.504601	0.504601	0.213917	0.150781	0.233586	0.194008	6.2453e-07	1.95924e+07
Mt2	5.4073e-08	1.33037	1.33037	0.040076	0.0159369	0.034167	0.0157171	6.93691e-07	19314549
Atp1b1	5.42175e-08	0.843739	0.843739	0.0761072	0.0424067	0.0763734	0.0483792	6.95019e-07	1.94068e+07
Egr1	7.112e-08	0.421992	0.421992	0.579955	0.432875	0.370031	0.339391	8.91447e-07	19671265
Dusp1	7.28108e-08	0.665251	0.665251	0.215343	0.135791	0.201653	0.164538	9.10618e-07	19560406
Ass1	7.34764e-08	0.650047	0.650047	0.0847189	0.0539879	0.11255	0.078831	9.18265e-07	1.946e+07
Slc3a2	8.01777e-08	0.248446	0.248446	0.52968	0.445886	0.487718	0.464637	9.93218e-07	19711919
Lef1	8.45899e-08	0.589006	0.589006	0.200263	0.133135	0.174185	0.136051	1.04634e-06	19531335
AW112010	8.87392e-08	1.58804	1.58804	0.027961	0.00930049	0.0276909	0.0115422	1.09209e-06	19293534
Cdh13	1.05485e-07	0.918439	0.918439	0.0712512	0.0376976	0.0556052	0.0321709	1.27683e-06	19362100
Rxrg	1.18503e-07	0.997186	0.997186	0.0377353	0.0189045	0.0482358	0.0265226	1.41918e-06	19345383
Mt1	1.29487e-07	0.731247	0.731247	0.165305	0.0995772	0.136222	0.101424	1.54092e-06	19484908
Arrdc4	1.67453e-07	0.433549	0.433549	0.23707	0.175535	0.265744	0.22667	1.95832e-06	1.95973e+07
Hist3h2ba	1.76747e-07	0.863357	0.863357	0.0406402	0.0223388	0.0524788	0.0299607	2.05707e-06	19351992
Iigp1	1.86535e-07	0.793081	0.793081	0.146231	0.0843913	0.120813	0.0884086	2.15911e-06	19462316
Gm29101	2.13234e-07	0.804493	0.804493	0.0742775	0.0425285	0.0837427	0.0559921	2.45139e-06	1.94081e+07
Tnfrsf1a	2.15282e-07	0.344474	0.344474	0.346401	0.272823	0.359982	0.327849	2.47159e-06	19646763
Btbd11	3.18683e-07	0.857609	0.857609	0.0846449	0.0467127	0.0937919	0.0653242	3.54804e-06	19420190
Sox5	3.51438e-07	0.421783	0.421783	0.231893	0.173108	0.235596	0.197692	3.88971e-06	19564755
Gdpd3	4.06051e-07	0.932597	0.932597	0.0537077	0.0281382	0.0625279	0.0388016	4.44765e-06	1.93663e+07
Prrx1	4.5239e-07	0.206106	0.206106	0.696099	0.60343	0.526351	0.509086	4.90761e-06	1.96877e+07
Mfap4	5.14332e-07	0.235063	0.235063	0.650902	0.553037	0.461143	0.423379	5.50798e-06	1.96663e+07
Psmb9	5.15112e-07	0.473929	0.473929	0.157205	0.113188	0.177758	0.141454	5.51037e-06	1.95114e+07
Klk8	5.2124e-07	0.897704	0.897704	0.0493615	0.0264943	0.0480125	0.0272593	5.56563e-06	19335481
Smpdl3b	5.47969e-07	0.892192	0.892192	0.031997	0.0172398	0.050469	0.029224	5.82505e-06	19340340
Smoc2	5.52331e-07	0.576961	0.576961	0.536521	0.35967	0.241179	0.206287	5.86774e-06	19562670
Spry1	5.98475e-07	0.647638	0.647638	0.0824301	0.0526172	0.104288	0.0744106	6.31438e-06	19428234
Ngfr	6.04177e-07	0.505529	0.505529	0.0969705	0.0683062	0.108307	0.077112	6.36265e-06	1.94329e+07
Hmgcs2	6.1641e-07	0.370386	0.370386	0.348677	0.269728	0.252791	0.213409	6.47135e-06	19567422
Sox11	6.23286e-07	0.372856	0.372856	0.394534	0.30468	0.330951	0.300098	6.52736e-06	1.96143e+07
Lrp1b	6.24653e-07	1.28894	1.28894	0.0305206	0.0124906	0.0332738	0.0164538	6.53763e-06	19300104
Gm40193	6.60752e-07	0.401617	0.401617	0.192814	0.145962	0.194953	0.157171	6.87421e-06	19522730
C2	6.95528e-07	0.664213	0.664213	0.124294	0.0784337	0.122823	0.0916012	7.20371e-06	1.94504e+07
Nr1d1	7.73405e-07	0.840381	0.840381	0.071114	0.0397169	0.0801697	0.0540275	7.94711e-06	1.93911e+07
Thsd7b	8.21399e-07	1.47068	1.47068	0.0369465	0.0133308	0.0267977	0.0120334	8.36917e-06	19281191
Amtn	1.31408e-06	1.02473	1.02473	0.0237322	0.0116644	0.0236713	0.0100688	1.28184e-05	19269851
Lgals9	1.37512e-06	0.795575	0.795575	0.0623758	0.0359356	0.0812863	0.055501	1.33522e-05	1.93875e+07
Ikzf5	1.39543e-06	0.331163	0.331163	0.272558	0.216655	0.30527	0.269646	1.35417e-05	19585582
Scube1	1.49022e-06	0.304262	0.304262	0.477793	0.386944	0.378741	0.355354	1.44038e-05	1.96198e+07
Cdca7	1.50293e-06	0.416615	0.416615	0.286201	0.214416	0.26753	0.235265	1.45018e-05	19563962
Adamts19	1.50867e-06	0.400301	0.400301	0.291408	0.2208	0.267977	0.234037	1.45406e-05	19563684
Gli1	1.55786e-06	0.420046	0.420046	0.273341	0.204295	0.279589	0.247053	1.49721e-05	1.95703e+07
Nfkbiz	1.65759e-06	0.690498	0.690498	0.107452	0.0665814	0.124163	0.0943026	1.58407e-05	19442270
Ier2	1.72674e-06	0.331671	0.331671	0.4889	0.388487	0.403975	0.378193	1.6455e-05	1.96256e+07
Sfi1	1.82047e-06	0.477381	0.477381	0.163737	0.117609	0.183341	0.149312	1.72608e-05	1.94992e+07
E030030I06Rik	1.86969e-06	0.957704	0.957704	0.0188932	0.00972768	0.0288075	0.0137525	1.7678e-05	1.92826e+07
Barx2	1.92889e-06	1.64627	1.64627	0.0168831	0.00539354	0.0169719	0.00589391	1.81971e-05	1.92467e+07
Nr4a1	2.03855e-06	0.766454	0.766454	0.0735087	0.0432129	0.0853059	0.0594303	1.91525e-05	19389834
Snhg12	2.05539e-06	0.28507	0.28507	0.40132	0.329364	0.405092	0.384578	1.92938e-05	19623338
Tbc1d8	2.2229e-06	0.903432	0.903432	0.040736	0.021778	0.053372	0.0326621	2.07511e-05	1.93363e+07
Cntfr	2.49387e-06	0.562429	0.562429	0.210135	0.142295	0.185574	0.15447	2.30645e-05	19497560
Igfbp6	2.54925e-06	0.524918	0.524918	0.23216	0.161351	0.18937	0.157171	2.35012e-05	1.95e+07
Ddx58	2.5508e-06	0.492816	0.492816	0.143212	0.101772	0.164359	0.131139	2.35012e-05	19477403
Tac1	2.58933e-06	0.800288	0.800288	0.088393	0.0507583	0.0605181	0.038556	2.37786e-05	19348173
Spred2	3.06424e-06	0.56822	0.56822	0.118379	0.0798404	0.151184	0.119597	2.76451e-05	19462774
6030458C11Rik	3.34525e-06	0.443189	0.443189	0.184369	0.135604	0.227557	0.193517	2.99569e-05	1.95239e+07
Il4ra	3.62417e-06	0.839547	0.839547	0.0462427	0.0258413	0.0582849	0.0370825	3.21823e-05	1.93416e+07
Sytl1	3.66083e-06	1.20374	1.20374	0.013859	0.00601685	0.0218848	0.00933202	3.24568e-05	19260058
Ogdhl	3.71017e-06	0.711143	0.711143	0.0611894	0.0373767	0.0824029	0.0574656	3.28426e-05	19379791
Tfap2c	3.91484e-06	1.17477	1.17477	0.0294449	0.0130427	0.0379634	0.0211198	3.45101e-05	19301028
Odam	4.01101e-06	1.88775	1.88775	0.0120596	0.00325884	0.0176418	0.00663065	3.52844e-05	19246423
Ifit3b	4.05033e-06	1.26451	1.26451	0.0181468	0.00755345	0.0203216	0.00834971	3.55196e-05	19254909
Zfp275	4.11411e-06	0.468634	0.468634	0.143499	0.103699	0.179768	0.146365	3.602e-05	1.94841e+07
Irf2bp1	4.13023e-06	0.330061	0.330061	0.288487	0.229492	0.322912	0.293468	3.61149e-05	1.95753e+07
Fos	4.34473e-06	0.428701	0.428701	0.707557	0.525666	0.38008	0.363703	3.77495e-05	19600018
Etv5	4.56428e-06	0.586252	0.586252	0.0721053	0.0480273	0.101385	0.074165	3.93541e-05	19402997
Dcxr	4.67409e-06	0.466067	0.466067	0.134337	0.0972512	0.161456	0.129175	4.02599e-05	19466312
Dpysl5	4.70564e-06	1.67741	1.67741	0.0176875	0.00552985	0.0194283	0.00785855	4.05111e-05	1.92516e+07
Dbp	4.91957e-06	0.511732	0.511732	0.209804	0.147153	0.19674	0.164538	4.22026e-05	1.94956e+07
Emilin2	5.86574e-06	0.276157	0.276157	0.390848	0.322758	0.341	0.306729	4.96156e-05	19575356
Sp100	5.95963e-06	1.13502	1.13502	0.020647	0.00940118	0.0267977	0.0130157	5.03092e-05	19271566
Isl1	5.98918e-06	1.04998	1.04998	0.030639	0.0147979	0.0261277	0.0125246	5.05083e-05	1.92697e+07
Slc22a15	6.06038e-06	0.386869	0.386869	0.23031	0.176138	0.245199	0.210707	5.10326e-05	19525112
Ccdc141	6.07333e-06	0.563058	0.563058	0.0767957	0.0519804	0.0926753	0.0665521	5.11162e-05	19388604
Gm26771	6.64198e-06	0.428753	0.428753	0.287696	0.21373	0.174185	0.140963	5.53997e-05	1.9472e+07
Dsc3	6.74177e-06	1.35348	1.35348	0.0284556	0.011136	0.0203216	0.00859528	5.61008e-05	1.92528e+07
Mapk13	7.07276e-06	0.564115	0.564115	0.104453	0.0706487	0.116793	0.0886542	5.86821e-05	1.94162e+07
Rusc1	7.25379e-06	0.421121	0.421121	0.196809	0.146986	0.222197	0.189587	6.01546e-05	1.95075e+07
Ntn4	7.41717e-06	0.870997	0.870997	0.037209	0.0203447	0.0453327	0.0272593	6.13893e-05	1.93121e+07
Rimbp2	7.77847e-06	1.1219	1.1219	0.0274206	0.0125995	0.030594	0.0159627	6.40976e-05	1.92798e+07
Socs1	8.13433e-06	0.550203	0.550203	0.126021	0.0860627	0.15163	0.121316	6.66731e-05	19449857
Dock3	9.03384e-06	1.0534	1.0534	0.0247589	0.0119296	0.0301474	0.0157171	7.3583e-05	19277846
Socs3	9.14276e-06	0.725066	0.725066	0.136906	0.082824	0.134658	0.106827	7.42915e-05	19432561
Sh3bgrl2	9.50947e-06	0.566687	0.566687	0.0911633	0.0615503	0.113667	0.0859528	7.70126e-05	19409000
Fstl4	1.10242e-05	1.10901	1.10901	0.0306788	0.0142231	0.0370701	0.0211198	8.81003e-05	19292505
Zfp703	1.12257e-05	0.388404	0.388404	0.174903	0.133621	0.208575	0.175589	8.96678e-05	1.94904e+07
Trim28	1.13331e-05	0.207054	0.207054	0.469593	0.406811	0.462037	0.449902	9.04403e-05	1.96041e+07
Fgf3	1.24225e-05	0.649152	0.649152	0.0750932	0.0478835	0.0808397	0.0574656	9.83925e-05	1.93656e+07
Slc6a6	1.33099e-05	0.327786	0.327786	0.364662	0.290547	0.313756	0.284872	0.000104832	19548063
Axin2	1.40664e-05	0.445505	0.445505	0.147343	0.108198	0.182224	0.151031	0.000110024	19467560
Adgrf4	1.41456e-05	1.05314	1.05314	0.039153	0.0188685	0.0368468	0.0211198	0.000110591	19290407
Pkp4	1.45527e-05	0.290571	0.290571	0.352063	0.287839	0.351496	0.324656	0.000113408	19562336
Fxyd3	1.47571e-05	0.955591	0.955591	0.0754131	0.0388853	0.0549352	0.0358546	0.000114895	19324655
Adamts20	1.483e-05	0.545973	0.545973	0.140522	0.0962474	0.140688	0.11223	0.000115251	1.94314e+07
2810001G20Rik	1.5193e-05	0.368785	0.368785	0.228548	0.176995	0.257928	0.22667	0.000117802	1.95168e+07
Rab26os	1.60275e-05	0.525231	0.525231	0.108241	0.075211	0.141358	0.112721	0.000123818	1.94309e+07
Epha7	1.71666e-05	0.389624	0.389624	0.263695	0.201286	0.256364	0.226179	0.000131241	1.95138e+07
2310030G06Rik	1.8932e-05	1.04227	1.04227	0.0261364	0.0126908	0.0390799	0.0230845	0.000143314	19293125
Gm47802	1.95544e-05	1.25597	1.25597	0.0218821	0.00916232	0.0261277	0.0132613	0.000147433	19263722
Rgs2	2.07417e-05	0.409394	0.409394	0.259326	0.195257	0.262394	0.233546	0.000155279	19513901
Epha4	2.08257e-05	0.391823	0.391823	0.206986	0.157758	0.207459	0.176817	0.000155701	19479747
Arap2	2.13544e-05	0.592078	0.592078	0.0295581	0.0196084	0.0370701	0.0213654	0.0001592	1.92879e+07
Cmtm5	2.15727e-05	0.807485	0.807485	0.0447566	0.0255729	0.0464493	0.0289784	0.000160577	19306346
Sh3gl3	2.20039e-05	0.900541	0.900541	0.0372178	0.019937	0.0511389	0.0329077	0.000163204	19314670
Gm9885	2.20211e-05	0.73009	0.73009	0.0813022	0.0490143	0.0779366	0.0559921	0.000163204	19356028
Fign	2.24273e-05	0.447893	0.447893	0.156219	0.114526	0.175078	0.144646	0.000166134	1.94546e+07
Snhg6	2.27309e-05	0.275756	0.275756	0.314579	0.259848	0.34301	0.319008	0.000168163	19550091
Fxyd6	2.30946e-05	0.308224	0.308224	0.310125	0.250468	0.293435	0.263752	0.000170556	1.95273e+07
Sp140	2.40915e-05	1.43302	1.43302	0.0156498	0.00579596	0.0225547	0.0108055	0.000177145	19253353
Mir17hg	2.4567e-05	0.76974	0.76974	0.0485548	0.0284785	0.0627512	0.0427308	0.000180195	1.93327e+07
Tbx2	2.51654e-05	0.214882	0.214882	0.433796	0.373766	0.414024	0.385069	0.000184003	19571009
Milr1	2.55511e-05	0.880862	0.880862	0.0567259	0.0308046	0.0645377	0.0444499	0.000186421	19335235
Gm15402	2.62629e-05	0.854533	0.854533	0.0480375	0.0265669	0.054042	0.035609	0.000191072	19318282
H2-M3	2.75717e-05	0.61956	0.61956	0.0510085	0.0331999	0.0661009	0.0454322	0.000199274	1.93365e+07
Pidd1	2.76886e-05	0.829513	0.829513	0.0180502	0.0101572	0.030594	0.0166994	0.000199948	19272303
Syne4	2.90429e-05	1.06495	1.06495	0.0221169	0.0105717	0.0308173	0.016945	0.000208572	19272575
Grik4	2.95936e-05	0.435137	0.435137	0.170394	0.126027	0.177311	0.14833	0.000212156	1.94523e+07
Fam53b	3.27891e-05	0.484611	0.484611	0.107937	0.0771415	0.138678	0.111002	0.000232128	19418149
Nr4a2	3.3069e-05	0.56335	0.56335	0.230021	0.155662	0.208575	0.182711	0.000233816	1.94738e+07
Stat2	3.57687e-05	0.698162	0.698162	0.0874082	0.0538747	0.104958	0.0807957	0.000250706	19383591
Midn	3.75503e-05	0.281028	0.281028	0.272052	0.2239	0.314203	0.287083	0.000262001	19527092
Ifit2	4.21758e-05	0.622742	0.622742	0.048992	0.0318172	0.0669942	0.0466601	0.000290327	19333731
Fas	4.65518e-05	0.673952	0.673952	0.0536022	0.0335972	0.0705672	0.0498527	0.000316208	1.93378e+07
Hapln3	4.72748e-05	0.531419	0.531419	0.122772	0.084943	0.142474	0.115914	0.000320349	19416559
Irs2	4.7893e-05	0.329932	0.329932	0.180967	0.143973	0.209469	0.178291	0.000324149	19465969
Tapbp	5.24439e-05	0.231798	0.231798	0.433667	0.369299	0.414471	0.395138	0.000350329	1.95554e+07
Maf1	5.28731e-05	0.313942	0.313942	0.281269	0.226264	0.31063	0.286837	0.000352779	1.95189e+07
Plek2	5.41876e-05	0.818584	0.818584	0.0245521	0.013921	0.0334971	0.0194008	0.000360272	19274382
9130410C08Rik	5.63726e-05	1.31675	1.31675	0.0249902	0.010032	0.0252345	0.0132613	0.00037275	19255737
Ltbp1	5.76951e-05	0.524968	0.524968	0.187542	0.130337	0.162573	0.135069	0.000380307	19430064
Ly6h	6.36973e-05	1.07844	1.07844	0.0342896	0.0162375	0.034167	0.0201375	0.000415825	1.92748e+07
Parp10	6.49661e-05	0.780004	0.780004	0.0379579	0.0221054	0.0491291	0.0321709	0.000422804	1.93022e+07
Ckmt1	6.98201e-05	1.16871	1.16871	0.0263996	0.0117431	0.023448	0.0120334	0.000450928	19250119
Fndc10	7.00094e-05	0.575546	0.575546	0.0746194	0.0500721	0.102054	0.0783399	0.000451978	19371550
Ly6c1	7.04584e-05	1.10519	1.10519	0.0176674	0.00821253	0.022778	0.0115422	0.000454357	19248384
Emb	7.2384e-05	0.412783	0.412783	0.255438	0.191878	0.238499	0.212181	0.00046518	19476938
Mfsd11	7.74641e-05	0.483933	0.483933	0.147972	0.105804	0.177088	0.150049	0.000494451	1.94363e+07
Rimklb	7.78064e-05	0.681055	0.681055	0.054893	0.0342373	0.0640911	0.0449411	0.000496261	19323582
Krt5	8.88272e-05	0.952718	0.952718	0.0609265	0.0314782	0.0424297	0.0270138	0.000557689	1.92881e+07
Hist3h2a	8.94668e-05	0.37959	0.37959	0.174667	0.134259	0.208575	0.180255	0.000560915	19454591
Tpp1	9.75693e-05	0.291599	0.291599	0.236196	0.192972	0.271326	0.242141	0.000606326	19487014
Sntg2	9.77175e-05	0.878781	0.878781	0.0267097	0.0145255	0.0281376	0.0157171	0.000606801	19259090
Irf6	0.000104211	1.08284	1.08284	0.0206555	0.00975146	0.0241179	0.0127701	0.000643587	19249519
Zfp458	0.000104905	0.51361	0.51361	0.0704006	0.0493133	0.0891023	0.0670432	0.00064716	19352014
Lgals3	0.000105913	0.823906	0.823906	0.0490192	0.0276915	0.0493524	0.0329077	0.000651957	19298422
Rbmxl1	0.000105885	0.241908	0.241908	0.282328	0.238744	0.321572	0.295923	0.000651957	1.95076e+07
Thyn1	0.000111223	0.26449	0.26449	0.306739	0.255358	0.341447	0.322692	0.000680931	19514954
Dglucy	0.000115935	0.489203	0.489203	0.0416749	0.02969	0.0602948	0.0417485	0.000706713	1.93139e+07
Tns2	0.000116719	0.45889	0.45889	0.152075	0.110641	0.171505	0.145383	0.000710466	19425297
Sp110	0.000118151	0.901447	0.901447	0.0197275	0.0105611	0.0292541	0.0166994	0.000717894	19260306
Fam181b	0.000125348	0.591248	0.591248	0.0610518	0.0405243	0.0719071	0.0523084	0.000756467	1.93292e+07
Clip3	0.000125951	0.265696	0.265696	0.258087	0.214676	0.291201	0.263016	0.000759597	1.94907e+07
Dusp6	0.000128789	0.38675	0.38675	0.096915	0.0741255	0.121259	0.095776	0.000773377	1.93819e+07
Gtse1	0.000132253	0.883473	0.883473	0.01675	0.00907952	0.0281376	0.0159627	0.000791367	19257223
Mpz	0.000132393	0.845467	0.845467	0.0234692	0.0130613	0.0230013	0.0120334	0.000791925	1.92454e+07
Pitpnc1	0.000136131	0.271288	0.271288	0.374201	0.310055	0.358196	0.341601	0.000811703	1.95162e+07
Egr3	0.000145819	0.635444	0.635444	0.0604908	0.0389405	0.0712372	0.0518173	0.000862489	1.93266e+07
Smoc1	0.000148498	0.83615	0.83615	0.0603273	0.0337915	0.0491291	0.0331532	0.000877412	1.92951e+07
Prdm1	0.000149788	0.487521	0.487521	0.0755538	0.0538887	0.0937919	0.0717092	0.000883631	19352775
Spry2	0.000151131	0.514903	0.514903	0.0890775	0.06234	0.114783	0.09111	0.000889867	1.9374e+07
Spry4	0.000160882	0.44873	0.44873	0.0681797	0.0499544	0.0895489	0.06778	0.00093944	19347097
Crim1	0.000161074	0.398891	0.398891	0.192862	0.146275	0.200089	0.17387	0.000939876	19438622
Prex2	0.000166083	0.522145	0.522145	0.0980582	0.0682814	0.101831	0.0795678	0.000965552	19360089
Lama1	0.000177016	0.399542	0.399542	0.161859	0.122705	0.182894	0.156925	0.00102133	19425746
Bex1	0.000179724	0.592995	0.592995	0.0668081	0.0442914	0.0770433	0.05722	0.00103518	1.93315e+07
4930520O04Rik	0.000183788	1.06098	1.06098	0.0179384	0.00859798	0.0259044	0.0144892	0.00105644	19250260
Rbm46	0.000197983	0.897597	0.897597	0.0294088	0.015786	0.0370701	0.0233301	0.00112846	1.92721e+07
Clec2d	0.000204113	0.406877	0.406877	0.128081	0.0966059	0.133988	0.109037	0.00116066	19386439
Net1	0.000207568	0.246851	0.246851	0.377993	0.318547	0.360652	0.337426	0.00117754	1.95057e+07
Ubash3b	0.000213919	0.506009	0.506009	0.0709811	0.0499826	0.088209	0.0672888	0.00120871	19342196
Sox8	0.000224215	0.811735	0.811735	0.0231884	0.0132104	0.0339437	0.0208743	0.00125978	1.92653e+07
Polr2h	0.000224221	0.227173	0.227173	0.345776	0.295399	0.38142	0.363212	0.00125978	19510740
Ms4a7	0.000225124	0.888059	0.888059	0.0334017	0.0180483	0.0317106	0.0191552	0.00126435	19261022
Pianp	0.000237868	0.315743	0.315743	0.267026	0.214539	0.290531	0.267927	0.00132545	19477233
Dpf2	0.0002391	0.21257	0.21257	0.356626	0.307768	0.387226	0.369352	0.00133188	1.95108e+07
Arhgef28	0.00024444	0.477421	0.477421	0.0756535	0.0543389	0.101385	0.0793222	0.00135805	19354163
Mcm7	0.000253655	0.289656	0.289656	0.309313	0.253048	0.297454	0.272839	0.00140418	1.94782e+07
Art3	0.000257789	0.541509	0.541509	0.0263361	0.0180942	0.0241179	0.0132613	0.00142428	19244065
St6galnac5	0.000257899	0.636801	0.636801	0.0910195	0.0585381	0.0897722	0.069499	0.00142442	1.93418e+07
Dlx1as	0.000264628	0.594035	0.594035	0.0629528	0.0417055	0.0661009	0.0481336	0.00145683	19313502
Col18a1	0.000276135	0.322818	0.322818	0.0787873	0.062991	0.0678874	0.0491159	0.0015128	19314905
Matn2	0.000279705	0.316068	0.316068	0.248697	0.199768	0.22778	0.201866	0.00152989	1.94435e+07
Gbp2	0.000285979	0.779057	0.779057	0.051798	0.0301852	0.0564984	0.0400295	0.00155967	1.92998e+07
Kcnk1	0.000287787	0.483897	0.483897	0.0930607	0.0665425	0.112104	0.0896365	0.00156852	1.93622e+07
Isg20	0.000290616	0.484391	0.484391	0.0411521	0.0294155	0.0520322	0.0358546	0.0015819	19292987
St14	0.000295903	0.591283	0.591283	0.0272039	0.0180567	0.0404198	0.026277	0.00160552	1.92746e+07
Hs3st6	0.000300751	1.07229	1.07229	0.0252175	0.0119925	0.0310406	0.0189096	0.00162874	1.92577e+07
Mir205hg	0.000300759	0.958343	0.958343	0.0383363	0.0197297	0.0261277	0.0149804	0.00162874	19247591
Ctbp2	0.000313157	0.344591	0.344591	0.197905	0.155857	0.237606	0.213654	0.00168029	1.94467e+07
Ptprg	0.000329864	0.266219	0.266219	0.296538	0.24657	0.321572	0.300589	0.00175879	1.94816e+07
Azin2	0.000338912	0.653342	0.653342	0.0571103	0.036311	0.0783832	0.0594303	0.00179854	19325598
Ddias	0.000344884	0.786507	0.786507	0.023983	0.013904	0.0377401	0.0243124	0.00182623	1.92688e+07
Pitx2	0.00034686	1.06064	1.06064	0.0420642	0.0201664	0.0265744	0.0154715	0.00183439	1.92476e+07
Sdk1	0.000356894	0.433457	0.433457	0.156892	0.116176	0.165252	0.141945	0.00188158	19401398
Gm5914	0.000358266	0.296087	0.296087	0.228873	0.186408	0.250782	0.225442	0.00188705	1.94498e+07
Parp14	0.000369412	0.528356	0.528356	0.107805	0.0747457	0.119026	0.0970039	0.00193673	19364867
Pear1	0.000376898	0.453544	0.453544	0.0660875	0.0482602	0.081063	0.0613949	0.00197109	19326969
Tnfsf9	0.000379844	0.70035	0.70035	0.0369355	0.0227309	0.0473426	0.0324165	0.00198405	19283603
Tiam1	0.000386696	0.246215	0.246215	0.361526	0.304805	0.350603	0.329568	0.00201797	19487351
Exoc4	0.0003877	0.358632	0.358632	0.267054	0.208277	0.285842	0.269892	0.00202196	1.94652e+07
Tenm2	0.000409137	0.452295	0.452295	0.0615623	0.0449947	0.0656543	0.047888	0.00212591	1.93078e+07
Mfsd5	0.000416761	0.351866	0.351866	0.125183	0.0980898	0.165252	0.139735	0.00216088	1.93977e+07
Parp12	0.00042194	0.510331	0.510331	0.0767621	0.0538917	0.100045	0.0793222	0.00218572	1.93454e+07
Chaf1b	0.000438671	0.685608	0.685608	0.0812707	0.0505296	0.0857526	0.0665521	0.00225789	1.93305e+07
Nop56	0.000460648	0.206998	0.206998	0.387431	0.335646	0.394372	0.379666	0.00235882	1.94961e+07
Irf1	0.000469646	0.455228	0.455228	0.140048	0.10215	0.155427	0.132367	0.00240139	1.93894e+07
Slc35g1	0.000482161	0.353808	0.353808	0.249593	0.195311	0.207905	0.183939	0.00245783	1.94217e+07
Rasgef1b	0.000505566	0.706907	0.706907	0.0159659	0.00978121	0.0256811	0.0149804	0.00256402	19243192
Cspg4	0.000524291	0.352515	0.352515	0.148177	0.116055	0.15766	0.133841	0.00264755	19388691
Hdac4	0.000556584	0.278724	0.278724	0.299425	0.246822	0.314203	0.295187	0.00278769	19466447
Bhlhe40	0.000583371	0.595498	0.595498	0.0667824	0.0441977	0.0828495	0.0643418	0.00290212	1.93237e+07
Vsig8	0.000637545	0.875813	0.875813	0.0220145	0.0119967	0.0247879	0.0144892	0.00314208	19239822
Abhd4	0.000650933	0.333304	0.333304	0.196194	0.155723	0.224654	0.202112	0.00320426	1.94244e+07
Spred1	0.000723073	0.227667	0.227667	0.365662	0.312281	0.376061	0.364686	0.00351147	1.94796e+07
Bckdhb	0.000732524	0.34983	0.34983	0.115473	0.0906088	0.15833	0.134823	0.00355126	1.93829e+07
Tcn2	0.000732766	0.240177	0.240177	0.318837	0.26994	0.331398	0.312868	0.00355142	1.94652e+07
Slc25a21	0.000743625	0.637748	0.637748	0.06278	0.0403497	0.0752568	0.0577112	0.00359787	19312208
Wnt4	0.000751536	0.437014	0.437014	0.151522	0.111923	0.143814	0.121562	0.00363096	19372557
Stard10	0.000764308	0.543423	0.543423	0.0929602	0.0637838	0.112997	0.0928291	0.00368066	19348396
Bcl6	0.00078257	0.862823	0.862823	0.0354992	0.0195202	0.0489058	0.0346267	0.00375518	19278913
Grk3	0.000801001	0.406004	0.406004	0.1499	0.113131	0.168379	0.14612	0.00383221	19388156
Zfhx2	0.000819409	0.481144	0.481144	0.0832739	0.0596582	0.109647	0.0891454	0.0039021	1.93441e+07
Epsti1	0.00083094	0.702966	0.702966	0.0305256	0.0187521	0.0390799	0.026277	0.00395146	1.92636e+07
Ptpre	0.000837264	0.27979	0.27979	0.0175528	0.0144584	0.0281376	0.0171906	0.00397595	19244395
Bcl2	0.00087384	0.264251	0.264251	0.28395	0.236425	0.294328	0.273084	0.00412649	19447598
Lsr	0.000878344	0.594662	0.594662	0.0244258	0.0161748	0.0417597	0.0284872	0.00414429	1.92672e+07
Gm26802	0.000885905	0.620164	0.620164	0.101351	0.065939	0.0980348	0.0790766	0.00417764	1.93329e+07
Bag2	0.000900763	0.482474	0.482474	0.0888208	0.0635735	0.119696	0.0989686	0.00424416	1.93511e+07
Erbb3	0.000949728	0.794137	0.794137	0.0289372	0.0166877	0.0281376	0.0174361	0.00444642	19243599
Phlda1	0.0010221	0.370988	0.370988	0.102305	0.0791075	0.123269	0.10167	0.00473681	19351462
Tmem37	0.00103345	0.853891	0.853891	0.0291813	0.0161457	0.0337204	0.0221022	0.00478156	1.92529e+07
Trerf1	0.00108594	0.336001	0.336001	0.159118	0.126059	0.188924	0.166257	0.00498387	1.93941e+07
Slco2a1	0.00115992	0.851935	0.851935	0.0451049	0.02499	0.034167	0.0225933	0.00527161	19252709
Gga2	0.00116844	0.313525	0.313525	0.199615	0.160625	0.239169	0.216847	0.00530467	19417846
Mapkapk3	0.00119502	0.461221	0.461221	0.0707535	0.0513933	0.084636	0.0667976	0.00540749	1.93155e+07
Kantr	0.00119524	0.453086	0.453086	0.102572	0.0749269	0.121483	0.101179	0.00540749	19347752
Unk	0.00127661	0.444623	0.444623	0.0871727	0.0640524	0.11724	0.0972495	0.00574491	19343285
Gm34552	0.00129535	0.549319	0.549319	0.0601242	0.0410854	0.0741402	0.0574656	0.00581995	19303730
Gbp7	0.0013337	0.448017	0.448017	0.138815	0.101758	0.146494	0.126473	0.00596064	1.93643e+07
Lurap1l	0.00138277	0.264811	0.264811	0.217802	0.181278	0.22711	0.204322	0.00615557	1.94082e+07
A530041M06Rik	0.00143637	0.808094	0.808094	0.0259371	0.0148136	0.0357302	0.0240668	0.00634425	19253356
Parp9	0.0014468	0.427516	0.427516	0.091019	0.0676764	0.112774	0.0933202	0.0063852	1.93376e+07
Cdt1	0.00147167	0.432956	0.432956	0.0459517	0.0340384	0.0665476	0.0505894	0.00647473	19293664
Gm11110	0.00148092	0.728123	0.728123	0.0215483	0.0130085	0.0328272	0.021611	0.00650868	19248299
N4bp3	0.00148215	0.706149	0.706149	0.0189842	0.0116364	0.0301474	0.0194008	0.0065124	19243721
Mfap1b	0.00150174	0.337371	0.337371	0.154492	0.122278	0.19473	0.172151	0.00658992	1.93902e+07
Ebf3	0.00153305	0.587965	0.587965	0.0489852	0.0325889	0.0551586	0.0407662	0.00669953	19279866
Kif21a	0.00153993	0.422654	0.422654	0.0873077	0.065136	0.106744	0.0874263	0.00672612	19331536
Prrt1	0.00159828	0.506397	0.506397	0.102523	0.0721741	0.107414	0.0891454	0.00694515	19331895
Tpm3-rs7	0.00161842	0.406375	0.406375	0.0770938	0.0581686	0.101161	0.0822692	0.00702181	1.9326e+07
Plk2	0.00168029	0.355821	0.355821	0.124727	0.0974647	0.140688	0.119352	0.00723469	1.93553e+07
Acad10	0.00170248	0.693511	0.693511	0.025411	0.0157129	0.0370701	0.0252947	0.00731348	19253850
C1qa	0.00174138	0.382927	0.382927	0.102491	0.0785981	0.0944618	0.0758841	0.00745588	19318887
Cpne5	0.00176587	0.44317	0.44317	0.133486	0.0981812	0.144707	0.124754	0.0075494	1.93575e+07
Plag1	0.0018506	0.671963	0.671963	0.0650573	0.0408333	0.0614113	0.0469057	0.00785613	1.92853e+07
Mia	0.00188833	0.597047	0.597047	0.0626255	0.0414021	0.0495757	0.0361002	0.00799223	19270397
Epb41l3	0.00190872	0.231731	0.231731	0.267268	0.227609	0.284055	0.26277	0.0080604	19423670
Sfrp2	0.00194226	0.20041	0.20041	0.706395	0.614778	0.282715	0.257367	0.00818163	19422036
Adar	0.00194822	0.39006	0.39006	0.0963234	0.0735042	0.127066	0.107073	0.00820061	1.93432e+07
Wwp2	0.00198087	0.314529	0.314529	0.219662	0.176633	0.244975	0.224951	0.00831738	19407898
Lrrc8d	0.00201977	0.497417	0.497417	0.053251	0.0377216	0.07682	0.0604126	0.00846184	1.93003e+07
Dmkn	0.0020267	0.484047	0.484047	0.123226	0.0881026	0.0975882	0.0798134	0.00848459	19319556
Trabd2b	0.00203571	0.495054	0.495054	0.0793985	0.056336	0.0922287	0.0746562	0.00851807	19314729
Abcg8	0.00208614	0.992545	0.992545	0.0216408	0.0108765	0.0299241	0.0196464	0.00869535	19240622
Lypla2	0.00208961	0.307215	0.307215	0.173744	0.14042	0.212595	0.191306	0.00870706	19391902
Wee1	0.00211525	0.400265	0.400265	0.085817	0.0650252	0.116347	0.0967583	0.00880524	19333682
Rhbdd2	0.00213766	0.317015	0.317015	0.151092	0.121286	0.1887	0.166503	0.00888541	1.93791e+07
Flt4	0.00216581	0.448588	0.448588	0.0553	0.0405216	0.0629745	0.047888	0.00899358	19284722
Robo1	0.00218567	0.204257	0.204257	0.356781	0.309681	0.371148	0.357318	0.00906936	19446808
Rmi2	0.0022314	0.71662	0.71662	0.0193204	0.0117569	0.0308173	0.0203831	0.00923423	19241492
Pcdhb9	0.00230677	0.513653	0.513653	0.0554797	0.0388605	0.0591782	0.0446955	0.00951128	1.92797e+07
Epha2	0.00232307	0.324197	0.324197	0.0786324	0.062807	0.106744	0.0876719	0.0095715	1.93245e+07
Ctss	0.00235144	0.567757	0.567757	0.0345385	0.0233019	0.0343904	0.0233301	0.00966958	1.92467e+07
Nudt3	0.00241449	0.214145	0.214145	0.292552	0.252196	0.330728	0.316306	0.0098979	1.94331e+07
Tshz3	0.00241623	0.314879	0.314879	0.156908	0.126141	0.193613	0.172397	0.00990068	19379120

## Sheet: Tdn
gene	p_val	avg_log2FC	abs_log2FC	avg_1_KO	avg_2_WT	pct_1_KO	pct_2_WT	p_val_adj	stats
Uba52	5.49391e-266	-0.291826	0.291826	1.95448	2.39266	0.935239	0.965373	4.65169e-262	15174252
Xist	4.7189e-264	-1.04588	1.04588	1.27006	2.62221	0.445511	0.944253	2.66366e-260	15252093
Hbb-bs	1.78576e-182	-0.533701	0.533701	1.19688	1.73266	0.759937	0.958497	5.04e-179	1.58671e+07
Hba-a2	1.29274e-116	-0.814409	0.814409	0.368819	0.648598	0.30661	0.564096	1.45942e-113	1.67848e+07
Itgb1	8.37431e-111	-0.275842	0.275842	1.5096	1.82767	0.873604	0.926817	8.67629e-108	1.65975e+07
Tmsb10	8.71011e-111	-0.264878	0.264878	2.18435	2.62457	0.923627	0.965373	8.67629e-108	1.65966e+07
Gm11808	5.33329e-107	-0.51828	0.51828	0.76869	1.10095	0.643591	0.790029	4.75337e-104	16670791
Hbb-bt	1.83476e-103	-0.944278	0.944278	0.251919	0.48475	0.225324	0.445236	1.47952e-100	1.70868e+07
Ftl1-ps1	1.22869e-87	-1.01121	1.01121	0.231209	0.466027	0.254355	0.443762	7.43095e-85	17228367
Rnaset2b	2.13085e-86	-0.814901	0.814901	0.306043	0.538385	0.327378	0.534381	1.20279e-83	17123543
Tpm1	4.9368e-76	-0.267687	0.267687	1.79754	2.16402	0.874944	0.929764	2.32222e-73	1.70433e+07
Sec61a1	6.78241e-76	-0.443164	0.443164	0.874678	1.1892	0.701206	0.847741	3.10414e-73	17056865
5830416I19Rik	2.08513e-72	-1.29533	1.29533	0.0998858	0.245154	0.0980348	0.246316	9.29201e-70	17807680
Anxa2	2.67637e-71	-0.278968	0.278968	1.56445	1.89819	0.849486	0.916994	1.13304e-68	1.71122e+07
Cdkn1c	1.5978e-68	-0.503433	0.503433	0.930172	1.3186	0.570344	0.738212	6.29235e-66	17194693
Col12a1	1.42439e-62	-0.456796	0.456796	0.959083	1.31633	0.577043	0.745825	4.72953e-60	1.72813e+07
Gm10062	8.00229e-60	-1.11711	1.11711	0.129302	0.280471	0.128852	0.270138	2.50946e-57	17856657
Hist1h1e	8.68974e-57	-0.728309	0.728309	0.297747	0.493276	0.276016	0.444745	2.4941e-54	1.75955e+07
Ogn	1.87493e-56	-0.569933	0.569933	0.708711	1.05205	0.376284	0.557711	5.29169e-54	1.74869e+07
Rpl10-ps3	2.86703e-55	-0.570382	0.570382	0.470243	0.698272	0.451541	0.590373	7.95906e-53	1.74638e+07
Nudt4	1.67786e-53	-0.276341	0.276341	1.91766	2.32252	0.823582	0.901277	4.58273e-51	1.73928e+07
Col3a1	2.84237e-53	-0.310773	0.310773	1.90272	2.36008	0.812416	0.87942	7.64011e-51	1.73976e+07
Rrbp1	3.42241e-53	-0.229	0.229	1.4244	1.66943	0.832291	0.895383	9.05548e-51	1.7398e+07
Sparc	1.50256e-52	-0.233999	0.233999	2.38528	2.8053	0.88678	0.943517	3.85522e-50	17407230
Akap12	1.535e-50	-0.521493	0.521493	0.626644	0.89951	0.445735	0.594057	3.56077e-48	17540721
Tsix	1.11511e-49	-0.770376	0.770376	0.127301	0.217139	0.128182	0.264244	2.45236e-47	1.79823e+07
Mc1r	1.22203e-49	-1.28165	1.28165	0.0746459	0.181476	0.0792765	0.188114	2.65305e-47	18155375
Tuba1a	2.59865e-46	-0.257642	0.257642	1.48079	1.77032	0.802367	0.885314	5.36653e-44	1.75202e+07
Gm49708	6.16437e-46	-0.742059	0.742059	0.215084	0.359741	0.228897	0.367878	1.25768e-43	17838418
Sept7	1.77907e-44	-0.25288	0.25288	1.07785	1.28435	0.77289	0.851424	3.50311e-42	1.75564e+07
Penk	1.26791e-43	-0.824835	0.824835	0.184424	0.326676	0.175525	0.303782	2.43987e-41	17969398
Nutf2-ps1	1.10656e-42	-0.719481	0.719481	0.204278	0.336362	0.249888	0.381631	2.10545e-40	1.7863e+07
Hist1h4d	2.25752e-42	-0.720523	0.720523	0.209147	0.344627	0.209692	0.34553	4.11063e-40	1.79233e+07
Mpp7	9.28278e-42	-1.2686	1.2686	0.0560158	0.134957	0.0770433	0.172397	1.65468e-39	18266972
S100a9	2.02164e-41	-1.17941	1.17941	0.0582446	0.131915	0.0647611	0.156434	3.56609e-39	18316339
Usp50	5.83821e-40	-0.778649	0.778649	0.166468	0.28558	0.203662	0.327603	1.00882e-37	17978279
Ggh	1.93661e-39	-0.518157	0.518157	0.33772	0.483657	0.359759	0.505648	3.21515e-37	17794251
Tpm2	4.93519e-39	-0.344988	0.344988	0.866388	1.10043	0.615453	0.735756	8.11383e-37	1.76823e+07
Pde6a	1.71357e-38	-1.15951	1.15951	0.0649053	0.144987	0.065431	0.153733	2.76358e-36	18350587
Stc2	5.19378e-38	-0.620389	0.620389	0.346867	0.533234	0.256364	0.387033	8.29731e-36	17930935
Erh	3.75239e-37	-0.419241	0.419241	0.531626	0.710903	0.469406	0.600933	5.82963e-35	1.77704e+07
Nr0b1	7.82505e-37	-2.27459	2.27459	0.0161348	0.0780696	0.0129522	0.0655697	1.20463e-34	18666916
Khdrbs3	8.43306e-37	-0.530063	0.530063	0.468186	0.676056	0.381867	0.508104	1.28654e-34	17832671
Igfbp5	1.62329e-36	-0.462847	0.462847	1.03323	1.42406	0.406655	0.542976	2.45435e-34	17817431
Kit	2.10817e-36	-0.570187	0.570187	0.417021	0.619157	0.30996	0.43836	3.13156e-34	1.79008e+07
Pafah1b1	3.42572e-36	-0.249538	0.249538	0.99681	1.18503	0.748548	0.844303	4.96591e-34	1.772e+07
C430049B03Rik	3.51794e-36	-0.759114	0.759114	0.163312	0.276398	0.181331	0.295678	5.04854e-34	1.80804e+07
Ptgis	4.67495e-36	-0.481855	0.481855	0.469734	0.656002	0.391023	0.520383	6.65257e-34	1.7839e+07
Man1a2	2.92907e-34	-0.288662	0.288662	0.890178	1.08736	0.687137	0.789293	4.03259e-32	1.77674e+07
Cldn10	3.14625e-34	-0.458134	0.458134	0.786148	1.07998	0.412461	0.541012	4.29666e-32	1.78605e+07
Hist1h4c	4.85609e-34	-1.33772	1.33772	0.0414007	0.104641	0.050469	0.124509	6.52643e-32	18472442
Gm10260	5.18348e-34	-1.01749	1.01749	0.158248	0.320355	0.152077	0.246562	6.91158e-32	1.81831e+07
Nes	5.99405e-34	-0.450275	0.450275	0.431874	0.590069	0.354623	0.497053	7.92994e-32	17901620
Eml4	7.78133e-34	-0.31581	0.31581	0.785285	0.977452	0.637115	0.746071	1.02147e-31	1.77845e+07
Trpm7	2.35001e-33	-0.330196	0.330196	0.723726	0.909857	0.584636	0.715128	3.03779e-31	1.78045e+07
Nrd1	8.18132e-33	-0.441551	0.441551	0.347333	0.4717	0.374274	0.512525	1.0339e-30	17910805
Hist1h4h	1.38007e-32	-0.926602	0.926602	0.0825004	0.156816	0.102054	0.193271	1.73112e-30	18314743
Ifitm1	1.45002e-32	-0.338901	0.338901	1.50624	1.90509	0.693613	0.748281	1.80549e-30	17806157
Ppic	2.62371e-32	-0.234853	0.234853	1.37356	1.61639	0.774676	0.864686	3.24306e-30	17800914
Sh3glb1	2.70612e-32	-0.271245	0.271245	0.878811	1.06059	0.686914	0.792976	3.32068e-30	1.78094e+07
Gas1	7.62987e-32	-0.464491	0.464491	0.435127	0.600402	0.350826	0.48502	9.22888e-30	1.79487e+07
Psip1	8.89994e-32	-0.308321	0.308321	0.763672	0.945629	0.625279	0.73723	1.06888e-29	17830930
Tubb2a	1.19543e-31	-0.452268	0.452268	0.430682	0.589255	0.404422	0.526768	1.42559e-29	17919243
Herc2	8.05838e-31	-0.449667	0.449667	0.328838	0.449102	0.361769	0.492141	9.34661e-29	1.79625e+07
Casc4	8.32769e-31	-0.358925	0.358925	0.525127	0.67346	0.50268	0.637525	9.59327e-29	1.78849e+07
Igf1	1.10116e-30	-0.527561	0.527561	0.535188	0.771468	0.331845	0.453831	1.25994e-28	17991634
Fabp3	1.79701e-30	-0.599226	0.599226	0.295482	0.447627	0.267307	0.378929	2.04232e-28	18062305
Pls3	2.18305e-30	-0.446276	0.446276	0.336743	0.458819	0.353506	0.485511	2.46452e-28	1.79768e+07
Cxcl12	2.40681e-30	-0.361199	0.361199	0.707773	0.90913	0.483698	0.615914	2.69913e-28	1.7903e+07
Bloc1s1	1.01653e-29	-0.291071	0.291071	0.724689	0.886692	0.630415	0.728389	1.11057e-27	17876974
Slx1b	2.76492e-29	-0.813714	0.813714	0.126418	0.222208	0.140688	0.235756	2.98223e-27	1.82766e+07
Col5a2	3.85915e-29	-0.286164	0.286164	1.20158	1.4652	0.711478	0.797151	4.11011e-27	17878199
Swap70	8.88115e-29	-0.567587	0.567587	0.21576	0.319766	0.250335	0.361493	9.34121e-27	1.81135e+07
Slc12a1	9.03826e-29	-1.07282	1.07282	0.0609322	0.128173	0.0623046	0.133841	9.44777e-27	18496145
Fer	1.01622e-28	-0.533069	0.533069	0.236976	0.342906	0.278696	0.394646	1.05575e-26	1.80819e+07
Col9a2	2.30789e-28	-0.325377	0.325377	0.844014	1.05754	0.550916	0.655697	2.35432e-26	17927335
Metrnl	2.51515e-28	-0.430443	0.430443	0.396871	0.534842	0.365565	0.490668	2.5504e-26	1.80133e+07
Rbis	3.92269e-28	-0.30753	0.30753	0.613813	0.759647	0.567664	0.68001	3.95398e-26	17926630
Gm7879	5.09345e-28	-1.03536	1.03536	0.0384136	0.0787333	0.0477892	0.112967	5.07368e-26	18561173
Pdlim5	6.33349e-28	-0.519727	0.519727	0.273082	0.391512	0.269093	0.38335	6.27201e-26	18108151
Tmem47	1.69577e-27	-0.459533	0.459533	0.292951	0.402836	0.310183	0.428291	1.6599e-25	1.80762e+07
Lhfp	2.20046e-27	-0.3247	0.3247	0.59708	0.747785	0.508933	0.641208	2.12929e-25	17959388
Dipk1a	2.80301e-27	-0.391964	0.391964	0.439088	0.576162	0.394596	0.524067	2.69694e-25	1.80159e+07
Spp1	3.27731e-27	-0.907023	0.907023	0.1128	0.21152	0.0658776	0.137033	3.13548e-25	18505221
Snx6	3.45331e-27	-0.332174	0.332174	0.548337	0.690307	0.522555	0.648084	3.2853e-25	1.79603e+07
Camp	3.54854e-27	-2.57368	2.57368	0.00577749	0.034395	0.0080393	0.0449411	3.31994e-25	1.88089e+07
Wdr89	4.64686e-27	-0.331155	0.331155	0.626646	0.788333	0.540866	0.628684	4.29999e-25	17963211
Hspe1	4.79393e-27	-0.213748	0.213748	1.12706	1.30705	0.758374	0.850688	4.41198e-25	1.79228e+07
Reep5	5.24516e-27	-0.278722	0.278722	0.728843	0.884174	0.609424	0.729617	4.77535e-25	17941952
Pbdc1	7.47031e-27	-0.471298	0.471298	0.263047	0.364677	0.308843	0.420923	6.76483e-25	1.80933e+07
Rab3b	1.74067e-26	-1.0558	1.0558	0.0666071	0.138467	0.072577	0.143664	1.55961e-24	18495862
Tbcb	1.91885e-26	-0.342007	0.342007	0.4874	0.617789	0.486378	0.604862	1.7102e-24	1.79921e+07
Rpl36a-ps1	1.92974e-26	-0.487743	0.487743	0.304103	0.426428	0.324699	0.431483	1.7109e-24	18090730
Omd	7.10453e-26	-0.324652	0.324652	0.701405	0.878414	0.475435	0.605845	6.10701e-24	18007536
Ninj1	8.96124e-25	-0.417975	0.417975	0.44533	0.594984	0.406208	0.507367	7.54973e-23	18073589
Smap1	1.26755e-24	-0.292684	0.292684	0.626566	0.767491	0.566771	0.675589	1.05738e-22	1.80109e+07
Rnf24	1.50129e-24	-0.4256	0.4256	0.314139	0.421929	0.328048	0.440324	1.24622e-22	18127113
Chd3	7.31967e-24	-0.286117	0.286117	0.735431	0.896751	0.593792	0.697937	5.87447e-22	1.80239e+07
Cops2	1.42595e-23	-0.359864	0.359864	0.388336	0.498353	0.414917	0.534136	1.12312e-21	1.80925e+07
Cib2	1.62406e-23	-0.358335	0.358335	0.423117	0.542413	0.426976	0.545678	1.27324e-21	18087900
Cltc	1.79194e-23	-0.267774	0.267774	0.708976	0.853571	0.609424	0.720039	1.39838e-21	1.80298e+07
S100a8	1.91036e-23	-0.772114	0.772114	0.0618854	0.105686	0.0652077	0.130403	1.48395e-21	1.85637e+07
Tpm3	2.1796e-23	-0.291097	0.291097	0.626771	0.766898	0.560518	0.676326	1.68536e-21	1.80426e+07
Acap2	2.75477e-23	-0.360623	0.360623	0.432877	0.555806	0.439035	0.553536	2.12042e-21	1.80887e+07
Ppp2r5a	3.88996e-23	-0.330429	0.330429	0.488363	0.614061	0.469406	0.586935	2.96723e-21	1.80785e+07
Adgrl3	4.5669e-23	-0.514519	0.514519	0.211467	0.302085	0.217061	0.312623	3.46798e-21	1.82731e+07
Mxd4	4.70126e-23	-0.220029	0.220029	0.95538	1.11279	0.709692	0.799116	3.53827e-21	1.80272e+07
Ccsap	5.24225e-23	-0.562825	0.562825	0.184612	0.272702	0.181108	0.27333	3.92798e-21	18322524
Rpl9-ps6	5.62986e-23	-0.23601	0.23601	0.882015	1.03878	0.655427	0.708743	4.19982e-21	18039085
Hivep3	7.41059e-23	-0.402272	0.402272	0.372568	0.492381	0.331398	0.442289	5.47995e-21	18163469
Vav3	7.46748e-23	-0.630543	0.630543	0.138819	0.214912	0.148057	0.234037	5.49802e-21	18379400
Pak1	7.84226e-23	-0.357955	0.357955	0.438804	0.562374	0.416927	0.52947	5.74895e-21	18110995
Irx5	8.17682e-23	-0.391684	0.391684	0.454859	0.59674	0.335194	0.446464	5.96838e-21	1.81616e+07
1110065P20Rik	1.1174e-22	-0.30356	0.30356	0.53753	0.663412	0.517418	0.630894	8.05193e-21	1.80734e+07
Mest	1.66919e-22	-0.269683	0.269683	0.831475	1.00238	0.57816	0.68836	1.18268e-20	18061530
Mme	2.0851e-22	-0.335138	0.335138	0.46079	0.581286	0.42251	0.53389	1.46511e-20	18118882
Rab18	2.48254e-22	-0.274057	0.274057	0.650682	0.786807	0.585083	0.69057	1.73002e-20	1.80649e+07
Stk39	2.5578e-22	-0.415826	0.415826	0.322464	0.430187	0.319116	0.424853	1.77515e-20	1.81869e+07
Clint1	2.91806e-22	-0.298636	0.298636	0.57809	0.71104	0.537293	0.653487	2.01692e-20	18077654
Desi2	3.23726e-22	-0.396274	0.396274	0.311508	0.409977	0.344127	0.449165	2.22844e-20	18171384
Taldo1	3.90287e-22	-0.279098	0.279098	0.60264	0.731265	0.552255	0.666012	2.66497e-20	1.80771e+07
din	4.59813e-22	-0.478418	0.478418	0.162441	0.226315	0.197633	0.293713	3.1271e-20	18316902
Pmch	4.96555e-22	-0.844516	0.844516	0.0925014	0.166101	0.0922287	0.160855	3.35006e-20	18513975
Erlec1	5.76346e-22	-0.299614	0.299614	0.512575	0.630885	0.492631	0.615668	3.87295e-20	1.80984e+07
Rab2a	9.19057e-22	-0.201422	0.201422	0.944457	1.08597	0.728227	0.812377	6.12729e-20	18059848
S100a13	1.10529e-21	-0.292456	0.292456	0.601665	0.736874	0.531711	0.636788	7.33998e-20	18095854
Igf2bp2	1.13467e-21	-0.780462	0.780462	0.0869777	0.1494	0.101831	0.173625	7.50568e-20	18496069
Tgfb3	1.24683e-21	-0.303397	0.303397	0.545525	0.673203	0.454444	0.578585	8.21553e-20	18121216
Id4	2.16084e-21	-0.368615	0.368615	0.533668	0.689026	0.410674	0.50835	1.40737e-19	18153473
Adamts6	2.34071e-21	-0.762189	0.762189	0.0893833	0.1516	0.101385	0.171906	1.51868e-19	1.85033e+07
Ccdc186	3.54197e-21	-0.371709	0.371709	0.32804	0.424446	0.353283	0.462181	2.28599e-19	18189021
Trim24	4.23372e-21	-0.453619	0.453619	0.235922	0.323088	0.26954	0.365668	2.71568e-19	1.82602e+07
Gucy1a1	4.42797e-21	-0.435863	0.435863	0.28783	0.389353	0.269093	0.371562	2.81119e-19	1.82583e+07
Ube2h	4.43244e-21	-0.334326	0.334326	0.407385	0.513626	0.417374	0.533644	2.81119e-19	18153526
Olfml3	5.27126e-21	-0.242093	0.242093	1.1123	1.31553	0.61925	0.73502	3.29385e-19	1.80924e+07
Nrep	5.63712e-21	-0.346745	0.346745	0.408225	0.519135	0.38812	0.499754	3.50952e-19	18172458
Maf	6.40778e-21	-0.346997	0.346997	0.50052	0.636616	0.333408	0.44278	3.9602e-19	1.82084e+07
Stmn1	9.60801e-21	-0.248787	0.248787	0.854685	1.01554	0.536177	0.664784	5.895e-19	18116315
Rala	9.95058e-21	-0.319469	0.319469	0.438504	0.547196	0.449084	0.569253	6.08315e-19	1.81475e+07
Gm36101	1.06295e-20	-0.862955	0.862955	0.0624643	0.113607	0.0614113	0.120334	6.4516e-19	1.86192e+07
Cdv3	1.16091e-20	-0.261445	0.261445	0.727941	0.872567	0.61389	0.71169	7.02105e-19	18104283
Socs2	1.53497e-20	-0.386961	0.386961	0.305866	0.399962	0.317552	0.424853	9.21745e-19	18229559
Adam10	1.54283e-20	-0.292603	0.292603	0.572996	0.701833	0.489281	0.600933	9.23192e-19	18138721
Ino80	1.57003e-20	-0.456089	0.456089	0.201517	0.276444	0.239616	0.334234	9.36157e-19	1.83027e+07
Gdpd2	1.61206e-20	-0.995768	0.995768	0.0523013	0.104296	0.0547119	0.109774	9.54496e-19	18645101
Sesn1	1.78675e-20	-0.498486	0.498486	0.204297	0.288616	0.232693	0.324902	1.05425e-18	1.83123e+07
Myo6	1.87945e-20	-0.332147	0.332147	0.439128	0.552812	0.42452	0.533644	1.10127e-18	18167853
Kcnj15	1.91055e-20	-0.43417	0.43417	0.327251	0.44216	0.256588	0.353635	1.11563e-18	1.82868e+07
Ufd1	2.5119e-20	-0.376797	0.376797	0.293697	0.381353	0.329388	0.434676	1.46174e-18	1.8227e+07
Rgs3	3.48456e-20	-0.245948	0.245948	0.865536	1.02641	0.620366	0.727652	2.02081e-18	1.81154e+07
Sphkap	5.75235e-20	-0.943482	0.943482	0.0552163	0.10619	0.0634212	0.120334	3.31328e-18	18626618
Stk25	7.30989e-20	-0.36801	0.36801	0.294432	0.379986	0.336757	0.441798	4.19613e-18	18233513
Trim2	7.95777e-20	-0.345976	0.345976	0.378028	0.480478	0.368468	0.481336	4.55259e-18	18212368
Lgmn	8.38856e-20	-0.299794	0.299794	0.553258	0.681044	0.465833	0.572937	4.78289e-18	1.81678e+07
Phb	9.34583e-20	-0.308678	0.308678	0.425378	0.526862	0.437025	0.552063	5.29305e-18	18179241
Slc24a5	9.38391e-20	-0.403609	0.403609	0.286209	0.378601	0.316883	0.415766	5.29691e-18	1.82521e+07
Adamts16	9.80195e-20	-2.10129	2.10129	0.0077502	0.0332555	0.0111657	0.0424853	5.51449e-18	18859585
Zeb2	1.01863e-19	-0.263709	0.263709	0.737007	0.884822	0.557168	0.662328	5.71173e-18	18141741
S100a1	1.02804e-19	-0.265619	0.265619	0.827237	0.994464	0.593569	0.67166	5.74551e-18	18136395
Nek6	1.16709e-19	-0.396104	0.396104	0.292716	0.3852	0.310853	0.411591	6.45868e-18	18258257
Vps13a	1.1997e-19	-0.4033	0.4033	0.335928	0.444275	0.322019	0.418222	6.6175e-18	1.8252e+07
Rap1gds1	1.41231e-19	-0.384564	0.384564	0.315022	0.41125	0.351496	0.449411	7.73981e-18	18233316
Ppp2r2b	1.6672e-19	-0.525643	0.525643	0.191199	0.275246	0.183117	0.267436	9.10719e-18	18395075
Gm47283	1.8799e-19	-0.211418	0.211418	1.101	1.27476	0.697856	0.84111	1.02361e-17	1.81241e+07
Thsd7a	2.00253e-19	-0.642544	0.642544	0.155267	0.242384	0.146047	0.221022	1.08341e-17	18454833
Rexo2	2.41047e-19	-0.259983	0.259983	0.625263	0.74873	0.555828	0.663802	1.29997e-17	18152144
Kbtbd11	2.8577e-19	-0.507123	0.507123	0.179076	0.254505	0.200536	0.287083	1.53626e-17	1.83774e+07
Arpc5	2.97453e-19	-0.245236	0.245236	0.702959	0.833208	0.607637	0.708497	1.59401e-17	1.81443e+07
Ube2q2	3.08543e-19	-0.440746	0.440746	0.206097	0.279736	0.256364	0.347986	1.64822e-17	18317314
Dok6	3.11453e-19	-0.35183	0.35183	0.455361	0.581121	0.373828	0.473723	1.65854e-17	1.82281e+07
Spag9	3.16373e-19	-0.25393	0.25393	0.656245	0.782539	0.583519	0.683939	1.67945e-17	1.81499e+07
Pcdh9	3.41318e-19	-0.574843	0.574843	0.147356	0.219489	0.1523	0.229617	1.80058e-17	18448285
Isoc2a	3.43574e-19	-0.845743	0.845743	0.0621192	0.11164	0.0819562	0.142436	1.80686e-17	18589621
Crispld1	3.83829e-19	-0.400778	0.400778	0.394222	0.52046	0.350826	0.440079	2.01231e-17	18247417
Ehd4	4.09001e-19	-0.486495	0.486495	0.215933	0.30253	0.238723	0.325884	2.13766e-17	1.83392e+07
Iqgap2	4.94655e-19	-0.401822	0.401822	0.288464	0.381111	0.288298	0.386542	2.55381e-17	1.8292e+07
Ptges3	9.13937e-19	-0.202386	0.202386	0.904547	1.04077	0.702546	0.784136	4.67571e-17	18146191
Fam241a	1.16988e-18	-0.595209	0.595209	0.117769	0.177913	0.127736	0.198674	5.94915e-17	1.85017e+07
Phf14	1.24897e-18	-0.250886	0.250886	0.641084	0.76285	0.577267	0.68222	6.33235e-17	1.81678e+07
Gm9833	1.40393e-18	-1.45615	1.45615	0.0153761	0.0421883	0.0216615	0.0586935	7.07565e-17	1.88081e+07
Col4a5	1.47921e-18	-0.463404	0.463404	0.230249	0.317465	0.237829	0.324411	7.43292e-17	18353267
Hist1h2ae	1.57719e-18	-0.771258	0.771258	0.0922889	0.157515	0.0792765	0.138752	7.90181e-17	1.86071e+07
Zmym4	1.84516e-18	-0.30085	0.30085	0.411209	0.506556	0.422063	0.525295	9.21709e-17	18223238
R3hdm2	2.16922e-18	-0.305877	0.305877	0.419036	0.517999	0.433229	0.54224	1.07408e-16	18219037
Mrps28	4.02883e-18	-0.274417	0.274417	0.565654	0.684162	0.531041	0.628929	1.98326e-16	18194482
Pdia5	4.27779e-18	-0.456332	0.456332	0.155626	0.213526	0.193167	0.275295	2.09971e-16	1.84143e+07
Amd1	5.16155e-18	-0.31357	0.31357	0.479945	0.596466	0.454891	0.552308	2.5189e-16	18222884
Nfe2l1	5.21057e-18	-0.265257	0.265257	0.568479	0.683227	0.5364	0.636297	2.53551e-16	1.8196e+07
Rasl11a	5.32039e-18	-0.555627	0.555627	0.155158	0.228052	0.153193	0.227407	2.58153e-16	18473122
Pdgfd	5.3622e-18	-0.367173	0.367173	0.317172	0.409095	0.314203	0.409627	2.59438e-16	18299422
Scin	6.04127e-18	-0.41939	0.41939	0.266356	0.356215	0.217731	0.305992	2.90633e-16	1.83871e+07
Asah1	6.96649e-18	-0.292398	0.292398	0.366008	0.44824	0.385663	0.497544	3.3325e-16	18254550
Myl9	7.51895e-18	-0.338476	0.338476	0.540794	0.683791	0.377847	0.478143	3.58665e-16	18262452
Ktn1	8.84509e-18	-0.20272	0.20272	0.856829	0.986096	0.68736	0.768418	4.20534e-16	1.81769e+07
Rarb	1.24541e-17	-0.37847	0.37847	0.280292	0.364369	0.284502	0.377701	5.84204e-16	1.83317e+07
Btbd7	1.50406e-17	-0.235147	0.235147	0.663875	0.781398	0.591782	0.693271	6.95894e-16	1.81966e+07
Ccl27a	1.83063e-17	-0.473062	0.473062	0.167054	0.231879	0.205672	0.287083	8.4239e-16	1.84147e+07
Rflnb	2.3636e-17	-0.286581	0.286581	0.596888	0.728052	0.49464	0.59111	1.07705e-15	1.82277e+07
Fbxl7	2.36602e-17	-0.237786	0.237786	0.822446	0.969814	0.61791	0.699656	1.07705e-15	18199434
Clec11a	2.35689e-17	-0.231531	0.231531	0.772504	0.906981	0.583519	0.681483	1.07705e-15	1.82044e+07
Wwp1	2.37576e-17	-0.366579	0.366579	0.2747	0.354169	0.310853	0.402996	1.07858e-15	18319653
Nckap1	2.52674e-17	-0.289691	0.289691	0.439807	0.537611	0.450201	0.551817	1.14406e-15	1.82435e+07
Dhrs1	2.73602e-17	-0.255714	0.255714	0.668016	0.797562	0.548236	0.639244	1.23552e-15	18215064
Myo5b	3.17587e-17	-0.474412	0.474412	0.193792	0.269245	0.165029	0.242878	1.42653e-15	18470853
Bphl	3.30137e-17	-0.333841	0.333841	0.332038	0.418489	0.362215	0.459725	1.47898e-15	18289315
Decr1	3.37329e-17	-0.375729	0.375729	0.281531	0.365285	0.332738	0.424853	1.50721e-15	1.83089e+07
Spats2l	3.82684e-17	-0.275557	0.275557	0.506272	0.612822	0.469183	0.571218	1.69643e-15	1.82415e+07
Epb41l2	3.901e-17	-0.280825	0.280825	0.492178	0.597942	0.460697	0.561886	1.72479e-15	18244980
Rwdd1	4.26899e-17	-0.213927	0.213927	0.768141	0.890922	0.642921	0.738458	1.87769e-15	18202181
Ate1	5.12376e-17	-0.315932	0.315932	0.311927	0.388292	0.34234	0.440815	2.24782e-15	1.83059e+07
Arhgap42	5.38117e-17	-0.371243	0.371243	0.249526	0.322753	0.267307	0.357318	2.35464e-15	18362966
Ufm1	5.84703e-17	-0.277056	0.277056	0.476112	0.576914	0.477669	0.579077	2.5519e-15	1.8244e+07
Wipi1	5.95958e-17	-0.297134	0.297134	0.429308	0.527492	0.424073	0.52333	2.58768e-15	1.82653e+07
Abhd3	6.75782e-17	-0.775603	0.775603	0.0711991	0.121886	0.0777133	0.13335	2.91878e-15	1.86409e+07
Lpl	7.43518e-17	-1.22928	1.22928	0.0504033	0.11817	0.0404198	0.0832515	3.18566e-15	1.87519e+07
Tln2	7.44963e-17	-0.407183	0.407183	0.279706	0.370917	0.290531	0.377456	3.18566e-15	18349294
Fam171b	7.83368e-17	-0.508351	0.508351	0.171772	0.244332	0.19004	0.266208	3.33305e-15	18449635
Arcn1	8.34433e-17	-0.257308	0.257308	0.557779	0.666684	0.524565	0.626228	3.54142e-15	18234285
Nsd1	9.8078e-17	-0.205834	0.205834	0.800716	0.923508	0.668825	0.757859	4.14178e-15	1.82102e+07
Ocel1	1.19606e-16	-0.652272	0.652272	0.0760765	0.119565	0.109201	0.171415	5.02583e-15	18578093
Kif13b	1.5314e-16	-0.451432	0.451432	0.175238	0.23962	0.200759	0.278978	6.41899e-15	18443135
Aldh7a1	1.90843e-16	-0.34871	0.34871	0.269213	0.342822	0.30862	0.402014	7.92092e-15	1.83448e+07
Higd1a	1.95681e-16	-0.252232	0.252232	0.59314	0.706458	0.54109	0.63556	8.10188e-15	1.8242e+07
Cep290	2.39465e-16	-0.367008	0.367008	0.270241	0.348523	0.287852	0.376228	9.84246e-15	18364079
Uaca	2.98302e-16	-0.299064	0.299064	0.413417	0.508646	0.384547	0.486248	1.21721e-14	1.83031e+07
Grpel1	4.96585e-16	-0.246081	0.246081	0.591249	0.70121	0.556722	0.656925	2.00696e-14	18250043
Chrdl1	5.08767e-16	-1.09729	1.09729	0.0330055	0.0706159	0.0332738	0.072446	2.0513e-14	1.87903e+07
Hspa4	5.30462e-16	-0.271647	0.271647	0.4572	0.551925	0.461367	0.554519	2.13369e-14	1.82795e+07
Gnai1	5.6425e-16	-0.333828	0.333828	0.314797	0.396755	0.338767	0.433939	2.24296e-14	18337721
Afdn	6.19321e-16	-0.304702	0.304702	0.391604	0.483696	0.397052	0.493124	2.45037e-14	18307534
Gm9803	6.22668e-16	-0.729328	0.729328	0.0608461	0.100875	0.0812863	0.136051	2.45787e-14	1.86505e+07
Fam98b	7.95405e-16	-0.335248	0.335248	0.272425	0.343689	0.319339	0.409136	3.12515e-14	18355615
Acbd3	8.00156e-16	-0.2637	0.2637	0.427958	0.513787	0.439482	0.540275	3.13654e-14	18291630
Micu2	8.37722e-16	-0.349655	0.349655	0.232255	0.295952	0.274676	0.361248	3.27621e-14	18389221
Avpi1	9.44873e-16	-0.330662	0.330662	0.320147	0.402613	0.336534	0.430255	3.67827e-14	1.83458e+07
Glrx5	9.9077e-16	-0.208493	0.208493	0.766258	0.885397	0.636891	0.727898	3.83929e-14	18245668
Smim10l1	1.09464e-15	-0.245796	0.245796	0.58246	0.690651	0.544886	0.652505	4.21289e-14	18262585
Mettl23	1.40344e-15	-0.287323	0.287323	0.393919	0.480728	0.415587	0.516208	5.38909e-14	1.83087e+07
Dtna	2.04209e-15	-0.510715	0.510715	0.132062	0.188156	0.138455	0.20555	7.75353e-14	18552934
Ice1	2.12148e-15	-0.314077	0.314077	0.295996	0.367988	0.332961	0.423379	8.01902e-14	1.83588e+07
Dhrs7	2.12086e-15	-0.282481	0.282481	0.395468	0.481002	0.414471	0.512525	8.01902e-14	18315041
Sppl2a	2.22097e-15	-0.225393	0.225393	0.654836	0.765566	0.564761	0.661346	8.35776e-14	1.8269e+07
Ubxn4	2.27321e-15	-0.216898	0.216898	0.634007	0.736863	0.569674	0.667731	8.53536e-14	1.82681e+07
Fam98a	2.32569e-15	-0.507327	0.507327	0.129797	0.184495	0.174408	0.244352	8.71312e-14	1.85054e+07
Dtd2	2.52869e-15	-0.371608	0.371608	0.224172	0.290032	0.272666	0.357073	9.4319e-14	18404386
Adk	2.89506e-15	-0.25607	0.25607	0.568593	0.679026	0.529701	0.618861	1.07276e-13	1.82817e+07
Psmd1	2.91931e-15	-0.303635	0.303635	0.361995	0.446793	0.389013	0.48502	1.07938e-13	1.83311e+07
Cast	3.01638e-15	-0.312372	0.312372	0.334779	0.415711	0.349933	0.442534	1.11042e-13	1.83526e+07
Cap1	3.13135e-15	-0.328602	0.328602	0.260529	0.327171	0.296338	0.384332	1.15025e-13	18388179
Cab39l	3.32539e-15	-0.370056	0.370056	0.273551	0.353538	0.298124	0.382367	1.21888e-13	1.83889e+07
Macf1	3.47169e-15	-0.222211	0.222211	0.713304	0.832083	0.608754	0.702112	1.26702e-13	1.82672e+07
Hs2st1	3.77311e-15	-0.278571	0.278571	0.410952	0.498482	0.414247	0.514244	1.37406e-13	1.83223e+07
Gpc5	4.63393e-15	-0.70208	0.70208	0.0664984	0.108183	0.0790531	0.131631	1.67673e-13	18672252
Zfp106	4.87963e-15	-0.234417	0.234417	0.548428	0.645188	0.516079	0.627947	1.75812e-13	18289538
Klkb1	4.91887e-15	-1.27438	1.27438	0.0209619	0.0507057	0.0209915	0.0527996	1.76849e-13	1.88571e+07
Cep83	5.07058e-15	-0.453472	0.453472	0.141868	0.194265	0.183564	0.25442	1.81918e-13	1.85021e+07
Prpsap1	5.23832e-15	-0.205236	0.205236	0.809805	0.933604	0.636668	0.718075	1.86749e-13	1.82695e+07
Med28	5.48589e-15	-0.251176	0.251176	0.506476	0.602796	0.507146	0.613458	1.95164e-13	1.82942e+07
Sh3kbp1	5.80567e-15	-0.282829	0.282829	0.385649	0.469172	0.385663	0.485511	2.05676e-13	1.83407e+07
Eno1b	6.49114e-15	-0.549681	0.549681	0.109508	0.160293	0.127066	0.190079	2.2948e-13	18583032
Chchd1	6.73011e-15	-0.201639	0.201639	0.745081	0.856846	0.643368	0.723723	2.37433e-13	18272218
Polb	6.83863e-15	-0.276431	0.276431	0.367278	0.444845	0.376284	0.475442	2.4076e-13	1.83476e+07
Arhgap10	7.6309e-15	-0.44083	0.44083	0.175263	0.237899	0.218178	0.291503	2.68095e-13	1.84689e+07
Pcm1	7.8804e-15	-0.20777	0.20777	0.739234	0.853743	0.630862	0.725442	2.76287e-13	1.82753e+07
Pik3c2g	8.25611e-15	-0.810154	0.810154	0.0519064	0.0910127	0.0549352	0.100196	2.88266e-13	18737866
Nfe2l3	8.32959e-15	-0.554476	0.554476	0.123496	0.18137	0.135328	0.198428	2.90233e-13	18573197
Hey1	8.8561e-15	-0.266742	0.266742	0.522997	0.629211	0.399285	0.49779	3.07945e-13	1.83403e+07
Gprin3	9.41971e-15	-0.563696	0.563696	0.104688	0.154735	0.123046	0.183939	3.26872e-13	1.8594e+07
Thap12	9.45258e-15	-0.286325	0.286325	0.393169	0.479481	0.416034	0.509332	3.27341e-13	1.8335e+07
Ascc3	1.01305e-14	-0.327363	0.327363	0.252845	0.317249	0.289415	0.376473	3.50101e-13	1.84075e+07
Kcnk2	1.06569e-14	-0.289256	0.289256	0.492275	0.601564	0.30996	0.403242	3.67544e-13	1.83923e+07
Azi2	1.20803e-14	-0.347557	0.347557	0.241865	0.30775	0.287405	0.371562	4.14105e-13	18412080
Cnnm4	1.30664e-14	-0.505331	0.505331	0.149021	0.211528	0.15833	0.225196	4.47004e-13	18544254
Zzz3	1.41917e-14	-0.258874	0.258874	0.444342	0.531675	0.449754	0.550835	4.8452e-13	18325977
Crot	1.44469e-14	-0.338816	0.338816	0.225633	0.285362	0.259044	0.344057	4.92243e-13	1.84353e+07
Gm49207	1.52984e-14	-0.843305	0.843305	0.0406963	0.0730155	0.0527021	0.0962672	5.20207e-13	1.87495e+07
Dusp11	1.56676e-14	-0.205451	0.205451	0.746331	0.860555	0.640464	0.730845	5.30629e-13	18284020
Ube2n	1.75262e-14	-0.251161	0.251161	0.517657	0.616097	0.501117	0.60167	5.91214e-13	1.83127e+07
Rpgrip1l	1.83289e-14	-0.523711	0.523711	0.106881	0.153658	0.136891	0.199902	6.16382e-13	1.85785e+07
Eif2s3x	2.14233e-14	-0.309351	0.309351	0.288431	0.357409	0.322019	0.409627	7.18382e-13	18395128
Commd1	2.20778e-14	-0.204406	0.204406	0.723503	0.833628	0.629075	0.717829	7.38866e-13	1.82906e+07
Stx2	2.37351e-14	-0.433387	0.433387	0.127738	0.172497	0.163912	0.232564	7.89648e-13	18542313
Selenbp1	2.47844e-14	-0.48547	0.48547	0.151494	0.212097	0.165476	0.233301	8.22939e-13	18541340
Usp46	2.73156e-14	-0.308234	0.308234	0.293508	0.363419	0.329835	0.416749	9.01681e-13	18393697
Mapkap1	2.72973e-14	-0.28382	0.28382	0.349605	0.425614	0.38343	0.475933	9.01681e-13	1.83638e+07
Cmc1	3.09592e-14	-0.281787	0.281787	0.396755	0.482335	0.421393	0.512279	1.01405e-12	1.83492e+07
Hacd1	3.47847e-14	-0.220081	0.220081	0.651298	0.758631	0.547566	0.638261	1.13496e-12	18311880
Copz2	3.50316e-14	-0.212767	0.212767	0.689494	0.79906	0.602278	0.691552	1.14082e-12	1.83014e+07
Sfrp4	3.52694e-14	-1.09614	1.09614	0.0615246	0.131529	0.0511389	0.0925835	1.14636e-12	18761431
Celf2	3.55198e-14	-0.424907	0.424907	0.163575	0.219597	0.169719	0.23944	1.15228e-12	18538934
Nars	3.56312e-14	-0.241775	0.241775	0.501136	0.592566	0.497097	0.597004	1.15369e-12	1.83239e+07
Ralb	3.67081e-14	-0.333375	0.333375	0.229313	0.288924	0.26753	0.349705	1.18629e-12	18440913
Tpd52	4.83117e-14	-0.533517	0.533517	0.141846	0.205315	0.171282	0.23502	1.54945e-12	18543643
Trappc4	4.9352e-14	-0.224034	0.224034	0.57617	0.672963	0.551139	0.638998	1.57684e-12	18316394
Tagln	5.00141e-14	-0.512888	0.512888	0.293791	0.419211	0.158776	0.222004	1.59499e-12	18559372
Rab5a	5.13735e-14	-0.261081	0.261081	0.419717	0.502979	0.430549	0.522102	1.63219e-12	18352374
Oip5os1	5.19015e-14	-0.218348	0.218348	0.579571	0.674273	0.5431	0.638261	1.64588e-12	18318137
Mmp9	5.25875e-14	-0.917036	0.917036	0.0598193	0.112953	0.0596248	0.103635	1.66452e-12	18740793
Paxbp1	5.32031e-14	-0.318985	0.318985	0.269824	0.336593	0.302814	0.385314	1.68086e-12	18420369
Myof	5.50576e-14	-0.267135	0.267135	0.412341	0.496218	0.3841	0.479862	1.72977e-12	18372128
Col25a1	5.56294e-14	-0.344696	0.344696	0.2805	0.356202	0.256811	0.338409	1.74041e-12	18454460
Cdkn1b	5.55208e-14	-0.242439	0.242439	0.507634	0.600527	0.488164	0.583251	1.74041e-12	18333371
Lama2	5.7441e-14	-0.382154	0.382154	0.204313	0.266278	0.211702	0.2861	1.79136e-12	1.84972e+07
Dop1b	6.07029e-14	-0.366649	0.366649	0.250566	0.323069	0.253685	0.331778	1.8896e-12	18459332
Arl4a	6.30072e-14	-0.211125	0.211125	0.88482	1.02426	0.635552	0.7139	1.95773e-12	18305680
Vdr	6.35255e-14	-0.380598	0.380598	0.249599	0.324949	0.221751	0.299116	1.97022e-12	18487589
Chn1	6.54023e-14	-0.285036	0.285036	0.484963	0.590898	0.411791	0.494352	2.02472e-12	18364985
Phtf2	6.57329e-14	-0.33915	0.33915	0.259191	0.327879	0.26887	0.349214	2.03124e-12	18447637
Erp44	6.89809e-14	-0.258832	0.258832	0.378516	0.452898	0.401965	0.501965	2.12773e-12	18366357
Tln1	6.96473e-14	-0.202035	0.202035	0.737133	0.847938	0.619696	0.713163	2.14438e-12	18308392
Pnpla8	7.21501e-14	-0.238737	0.238737	0.467547	0.551686	0.46695	0.562623	2.21339e-12	18343539
Cetn2	7.65863e-14	-0.266981	0.266981	0.402263	0.484038	0.424743	0.51891	2.34523e-12	18359649
Gm13166	8.24778e-14	-0.794777	0.794777	0.052666	0.0913656	0.0656543	0.111493	2.52108e-12	18728604
Gstp1	8.42874e-14	-0.46879	0.46879	0.153833	0.212898	0.155427	0.219303	2.57175e-12	18568464
Eea1	8.9286e-14	-0.263064	0.263064	0.365183	0.438229	0.378294	0.472741	2.70962e-12	1.83817e+07
Grb10	9.09392e-14	-0.269783	0.269783	0.532377	0.641848	0.450871	0.537083	2.75486e-12	18353748
Trim12a	9.24248e-14	-0.769852	0.769852	0.0483644	0.0824659	0.0564984	0.0999509	2.79486e-12	1.87526e+07
Top2b	9.60178e-14	-0.206599	0.206599	0.704854	0.813377	0.60987	0.698919	2.89833e-12	1.83149e+07
Dlc1	1.08359e-13	-0.240291	0.240291	0.501295	0.592145	0.46025	0.55722	3.25347e-12	1.83513e+07
Polr2l	1.17308e-13	-0.380414	0.380414	0.210535	0.274057	0.249665	0.323428	3.51593e-12	18472162
Me1	1.18558e-13	-0.280581	0.280581	0.392814	0.477145	0.400625	0.489194	3.5471e-12	18376684
Ppp2r2d	1.23505e-13	-0.276353	0.276353	0.350451	0.424441	0.377847	0.47053	3.68859e-12	1.83867e+07
Zfyve16	1.26404e-13	-0.2709	0.2709	0.30681	0.370185	0.333631	0.425344	3.76853e-12	1.841e+07
Prss35	1.35683e-13	-0.213417	0.213417	0.753245	0.873336	0.526351	0.62721	4.03805e-12	18335284
Nfu1	1.58174e-13	-0.307502	0.307502	0.276856	0.342627	0.322689	0.410118	4.69916e-12	18420484
Sulf1	1.58945e-13	-0.224166	0.224166	0.558994	0.652962	0.451318	0.554028	4.7138e-12	18358760
Cyp20a1	1.76261e-13	-0.404265	0.404265	0.144532	0.191276	0.181554	0.250246	5.21819e-12	1.85432e+07
Btaf1	1.88962e-13	-0.400338	0.400338	0.166589	0.219866	0.208129	0.27775	5.57472e-12	1.85164e+07
Il2	1.93459e-13	-0.699561	0.699561	0.0530655	0.086179	0.0701206	0.11665	5.69744e-12	18724853
Ncapd3	2.18526e-13	-0.400006	0.400006	0.186974	0.246715	0.219294	0.290029	6.40227e-12	18507036
Uba5	2.20249e-13	-0.273544	0.273544	0.31627	0.382299	0.349933	0.440324	6.44161e-12	18408904
Erc1	2.40423e-13	-0.312024	0.312024	0.282157	0.350283	0.313533	0.398084	7.00744e-12	1.84323e+07
Mrps12	2.4789e-13	-0.244668	0.244668	0.404501	0.479261	0.430103	0.522839	7.21265e-12	18374284
Pakap	2.83895e-13	-0.555386	0.555386	0.116137	0.170671	0.143144	0.202358	8.20388e-12	18599267
Crip1	2.8476e-13	-0.230836	0.230836	0.770741	0.904476	0.527468	0.604862	8.21488e-12	1.83486e+07
Mdp1	2.93691e-13	-0.309844	0.309844	0.273832	0.339434	0.321126	0.405943	8.4581e-12	18430275
Olfml1	3.08834e-13	-0.238758	0.238758	0.635892	0.750337	0.510049	0.590128	8.84907e-12	18353902
Ankib1	3.28978e-13	-0.378736	0.378736	0.161502	0.209985	0.202546	0.273576	9.37864e-12	18527464
Vwc2	3.34348e-13	-1.13303	1.13303	0.0186655	0.0409369	0.0205449	0.0493615	9.49975e-12	1.88842e+07
Adamts9	3.33922e-13	-0.404062	0.404062	0.294261	0.389375	0.255025	0.32613	9.49975e-12	1.84816e+07
Naalad2	3.36651e-13	-0.44376	0.44376	0.140301	0.19083	0.15297	0.215619	9.54915e-12	1.85865e+07
Htatsf1	3.50513e-13	-0.261646	0.261646	0.36513	0.437735	0.384323	0.475196	9.92574e-12	1.83984e+07
Crnkl1	3.55658e-13	-0.321636	0.321636	0.23659	0.295678	0.284725	0.361984	1.00546e-11	1.84583e+07
Cpne3	3.76026e-13	-0.263677	0.263677	0.341761	0.410295	0.364672	0.454813	1.0595e-11	1.84088e+07
Pdgfrl	4.02975e-13	-0.23812	0.23812	0.520678	0.614117	0.451987	0.550835	1.13355e-11	1.83725e+07
Gtf2b	4.79693e-13	-0.262163	0.262163	0.38027	0.456048	0.406878	0.498772	1.33824e-11	1.83929e+07
Jdp2	4.98405e-13	-0.307338	0.307338	0.235278	0.291138	0.262841	0.345776	1.38816e-11	18476331
Zfp664	5.17298e-13	-0.302237	0.302237	0.280737	0.346164	0.322019	0.406925	1.43841e-11	1.84372e+07
Mrpl21	5.24712e-13	-0.250297	0.250297	0.411281	0.489199	0.434122	0.524312	1.45664e-11	18383930
Cmpk1	5.33768e-13	-0.237272	0.237272	0.481539	0.56762	0.477892	0.566061	1.47935e-11	18369949
Acp1	5.51997e-13	-0.227466	0.227466	0.525999	0.615828	0.514739	0.612475	1.52737e-11	18359089
Cul2	5.92733e-13	-0.377327	0.377327	0.167626	0.217734	0.215051	0.285118	1.63741e-11	1.85229e+07
Gamt	6.00798e-13	-0.387505	0.387505	0.160802	0.21035	0.19272	0.262279	1.65161e-11	1.85448e+07
Macrod2	6.3669e-13	-0.376145	0.376145	0.176484	0.229053	0.205002	0.275295	1.74744e-11	1.85331e+07
Cbln1	6.92571e-13	-3.53018	3.53018	0.00140904	0.0162785	0.00267977	0.0181729	1.88857e-11	19004213
Rbp1	6.96328e-13	-0.248921	0.248921	0.53126	0.631306	0.459134	0.546169	1.89576e-11	1.83799e+07
Tmem128	7.00461e-13	-0.255645	0.255645	0.386701	0.46167	0.41916	0.504175	1.90395e-11	1.83946e+07
Stard3nl	7.4196e-13	-0.278493	0.278493	0.379532	0.460345	0.401519	0.48723	2.01352e-11	1.84025e+07
Cnot4	8.21119e-13	-0.25061	0.25061	0.370059	0.440263	0.403082	0.492141	2.21768e-11	1.84026e+07
Rpgrip1	8.33468e-13	-0.456653	0.456653	0.0893645	0.12264	0.11657	0.172888	2.24744e-11	18648581
Capza1	8.44233e-13	-0.254234	0.254234	0.368009	0.438926	0.397052	0.487475	2.27285e-11	1.84052e+07
Gucy1b1	8.51903e-13	-0.511532	0.511532	0.131275	0.187141	0.150514	0.209725	2.28986e-11	18601177
Tafa5	8.53722e-13	-0.253799	0.253799	0.653758	0.779504	0.475212	0.544204	2.29111e-11	1.83805e+07
Cwf19l2	8.92831e-13	-0.271226	0.271226	0.355675	0.42924	0.38008	0.465864	2.39228e-11	18414458
Brip1os	1.02193e-12	-0.297627	0.297627	0.24387	0.299746	0.262841	0.341847	2.72098e-11	18486800
Coq2	1.07775e-12	-0.317596	0.317596	0.223792	0.278901	0.267977	0.34553	2.8606e-11	18484241
Pak2	1.16798e-12	-0.227602	0.227602	0.535861	0.627432	0.518088	0.616405	3.09041e-11	18369416
Pmpcb	1.17397e-12	-0.266011	0.266011	0.311538	0.374618	0.355739	0.445481	3.10141e-11	18428989
Spast	1.19232e-12	-0.305882	0.305882	0.204892	0.253283	0.246092	0.324411	3.14498e-11	18501721
Shoc2	1.20958e-12	-0.229339	0.229339	0.485198	0.568796	0.471416	0.568271	3.1806e-11	18382702
Sec22a	1.24678e-12	-0.303466	0.303466	0.228447	0.281927	0.27423	0.351424	3.27332e-11	18481784
Psme4	1.26625e-12	-0.247857	0.247857	0.38823	0.461001	0.401295	0.489194	3.3193e-11	18409756
Golgb1	1.51218e-12	-0.204926	0.204926	0.685768	0.790435	0.563198	0.657662	3.94564e-11	18364026
Arpc1b	1.57036e-12	-0.229382	0.229382	0.571532	0.670026	0.508039	0.59725	4.09115e-11	18377449
Rspo4	1.58175e-12	-0.200694	0.200694	0.97051	1.11536	0.564761	0.642436	4.1145e-11	18365968
Ambn	1.61101e-12	-0.208218	0.208218	0.725225	0.837824	0.494194	0.56778	4.18418e-11	18383566
Rhoq	1.6488e-12	-0.290141	0.290141	0.28714	0.351103	0.318446	0.398821	4.27576e-11	1.84562e+07
Map4	1.79773e-12	-0.220373	0.220373	0.558107	0.650215	0.516079	0.601916	4.64776e-11	18377874
Zfpm2	1.8332e-12	-0.526997	0.526997	0.08623	0.124251	0.108531	0.161346	4.73222e-11	1.86706e+07
Commd6	1.89783e-12	-0.236133	0.236133	0.462979	0.545311	0.476775	0.566306	4.89117e-11	18388858
Gm19531	2.08383e-12	-1.01926	1.01926	0.0249551	0.0505807	0.0364002	0.0702358	5.35472e-11	1.8836e+07
Mrpl36	2.11324e-12	-0.248084	0.248084	0.369913	0.439319	0.396606	0.490914	5.42206e-11	1.84178e+07
Zfp950	2.17733e-12	-0.269224	0.269224	0.344151	0.414757	0.361322	0.446464	5.56266e-11	18435982
Etf1	2.18702e-12	-0.292327	0.292327	0.325294	0.39836	0.362439	0.440815	5.57756e-11	18437069
Unc13c	2.23818e-12	-0.688768	0.688768	0.0763519	0.123072	0.0806163	0.126965	5.69945e-11	18724215
Resf1	2.29915e-12	-0.240824	0.240824	0.588441	0.695342	0.50469	0.586198	5.83715e-11	18385035
Dst	2.44749e-12	-0.204737	0.204737	0.66323	0.764357	0.556052	0.652505	6.19518e-11	18372636
St8sia6	2.67692e-12	-0.273233	0.273233	0.423385	0.511666	0.316883	0.401768	6.74568e-11	18462440
Dbndd2	2.81741e-12	-0.289291	0.289291	0.364366	0.445269	0.355516	0.435658	7.08917e-11	18443641
P4ha2	2.87329e-12	-0.231132	0.231132	0.539486	0.633224	0.465386	0.554519	7.20835e-11	1.83986e+07
Brd9	2.87241e-12	-0.218219	0.218219	0.494035	0.57471	0.484368	0.580305	7.20835e-11	18392049
Gm32687	2.97269e-12	-1.5656	1.5656	0.00736224	0.0217923	0.00937919	0.0302063	7.44667e-11	18956117
Ramac	3.00683e-12	-0.262978	0.262978	0.299792	0.359737	0.341894	0.425589	7.52108e-11	1.84506e+07
Cyb5r4	3.01937e-12	-0.509674	0.509674	0.110218	0.15692	0.153193	0.210953	7.52439e-11	1.86122e+07
Pcp4l1	3.02149e-12	-0.297429	0.297429	0.318654	0.391611	0.255695	0.33276	7.52439e-11	1.85066e+07
Ngp	3.30636e-12	-1.71587	1.71587	0.00634658	0.0208482	0.00692273	0.0257859	8.20966e-11	1.89737e+07
Tjp1	3.46661e-12	-0.333378	0.333378	0.248581	0.313202	0.286065	0.361984	8.5829e-11	1.84876e+07
Mia2	3.5739e-12	-0.236522	0.236522	0.474836	0.559427	0.475659	0.559676	8.82222e-11	1.83995e+07
Cmbl	3.59844e-12	-0.584854	0.584854	0.0878206	0.131721	0.0971416	0.147348	8.85929e-11	1.86967e+07
Sncaip	3.59938e-12	-0.421422	0.421422	0.14561	0.195008	0.162349	0.223969	8.85929e-11	1.86013e+07
Pik3r3	3.61607e-12	-0.453265	0.453265	0.116357	0.159308	0.147164	0.206041	8.88745e-11	18620734
Zfp329	3.73611e-12	-0.276337	0.276337	0.332168	0.402294	0.365118	0.444253	9.14267e-11	1.84432e+07
Dip2b	3.86957e-12	-0.350261	0.350261	0.210132	0.267875	0.249665	0.319008	9.45561e-11	18517157
Cd1d1	4.35767e-12	-0.304796	0.304796	0.232206	0.286831	0.23582	0.311395	1.0633e-10	18527206
Jrkl	4.59476e-12	-0.473133	0.473133	0.111186	0.154339	0.144931	0.202358	1.11632e-10	1.86269e+07
Tmem106b	4.88072e-12	-0.241909	0.241909	0.397619	0.470207	0.415141	0.499754	1.18072e-10	18424525
Angpt1	5.22692e-12	-0.310748	0.310748	0.291522	0.361589	0.238499	0.313114	1.25907e-10	1.85277e+07
Commd5	5.28922e-12	-0.6004	0.6004	0.0644193	0.0976684	0.0899955	0.137525	1.27227e-10	1.87141e+07
Hikeshi	5.34577e-12	-0.237093	0.237093	0.424466	0.500282	0.448414	0.537819	1.28405e-10	1.84133e+07
Pibf1	5.50268e-12	-0.363546	0.363546	0.168233	0.216446	0.202322	0.26891	1.31986e-10	1.85627e+07
Fyttd1	5.89734e-12	-0.215002	0.215002	0.49522	0.574804	0.492854	0.583006	1.41053e-10	1.84015e+07
Arhgap28	5.98865e-12	-0.402123	0.402123	0.150042	0.198273	0.184234	0.246807	1.42833e-10	1.85832e+07
Fam114a1	6.54766e-12	-0.267633	0.267633	0.318352	0.383242	0.345467	0.42387	1.55509e-10	1.84611e+07
Sh3pxd2a	6.72489e-12	-0.300954	0.300954	0.393257	0.484477	0.383653	0.458006	1.59495e-10	18444210
Pde5a	7.42865e-12	-0.289687	0.289687	0.320994	0.392376	0.30996	0.386542	1.75449e-10	18482836
Acadl	8.27572e-12	-0.228897	0.228897	0.43685	0.511962	0.442162	0.53389	1.95183e-10	1.84216e+07
Gm8797	8.55498e-12	-0.489546	0.489546	0.0895491	0.125727	0.11858	0.171415	2.00964e-10	18670778
Rabep1	8.55644e-12	-0.28163	0.28163	0.27555	0.33495	0.311076	0.390226	2.00964e-10	18483428
Hapln1	8.59926e-12	-0.287491	0.287491	0.333354	0.406864	0.325592	0.40275	2.0169e-10	1.84758e+07
Cbx5	8.71028e-12	-0.212949	0.212949	0.557638	0.646333	0.520768	0.605845	2.04011e-10	18401135
Ccdc171	9.67348e-12	-0.811341	0.811341	0.0429563	0.0753814	0.0538187	0.0920923	2.25635e-10	1.87976e+07
Mapkbp1	1.00905e-11	-0.459543	0.459543	0.0904256	0.124345	0.119696	0.172642	2.34966e-10	1.86708e+07
Gpx7	1.01013e-11	-0.232464	0.232464	0.447064	0.525228	0.442608	0.528733	2.34966e-10	18425365
Setdb2	1.08105e-11	-0.81604	0.81604	0.040906	0.0720178	0.0573917	0.0962672	2.51119e-10	18789992
Jpt1	1.16765e-11	-0.224309	0.224309	0.543341	0.634741	0.502233	0.585462	2.70491e-10	1.84105e+07
Col4a6	1.21302e-11	-0.55447	0.55447	0.0719258	0.105632	0.0783832	0.123527	2.80619e-10	1.87437e+07
Slc12a6	1.23046e-11	-0.348075	0.348075	0.181925	0.231565	0.208575	0.274804	2.83876e-10	18567001
Suco	1.27827e-11	-0.259814	0.259814	0.283515	0.33946	0.319116	0.397348	2.94506e-10	18484714
Phyh	1.4809e-11	-0.302394	0.302394	0.237647	0.293064	0.26954	0.344548	3.38887e-10	1.85184e+07
Emc3	1.49163e-11	-0.215573	0.215573	0.440901	0.511959	0.46159	0.54887	3.40882e-10	1.84251e+07
Arhgef10	1.50175e-11	-0.274403	0.274403	0.338883	0.409877	0.34904	0.428045	3.42731e-10	1.84711e+07
Mcfd2	1.54092e-11	-0.286055	0.286055	0.275346	0.33573	0.318669	0.396611	3.51198e-10	1.84877e+07
Syt6	1.568e-11	-0.366067	0.366067	0.177233	0.228425	0.145601	0.205796	3.56888e-10	18637700
Olfr57	1.5786e-11	-1.83746	1.83746	0.00618189	0.0220929	0.00781599	0.0265226	3.5882e-10	18975018
Uggt2	1.61619e-11	-0.304999	0.304999	0.215949	0.266787	0.245645	0.317534	3.6687e-10	1.85378e+07
Gsr	1.66579e-11	-0.288379	0.288379	0.344879	0.421189	0.350826	0.424853	3.77624e-10	1.84729e+07
Pawr	1.72075e-11	-0.495192	0.495192	0.0878065	0.123764	0.11657	0.168222	3.89561e-10	1.86814e+07
Psmd12	1.72335e-11	-0.238609	0.238609	0.45279	0.534226	0.470299	0.553536	3.8963e-10	1.84253e+07
Cdkl1	1.79975e-11	-0.855511	0.855511	0.0380094	0.0687742	0.049799	0.0861984	4.06359e-10	1.88133e+07
Npc1	1.83818e-11	-0.33938	0.33938	0.165554	0.209462	0.190487	0.255157	4.14484e-10	1.85893e+07
Gnaz	1.9195e-11	-0.796184	0.796184	0.0476368	0.0827213	0.0594015	0.0982318	4.32245e-10	18790141
Smim13	2.05629e-11	-0.311856	0.311856	0.191035	0.237133	0.235373	0.305501	4.62434e-10	18549504
Tmem267	2.08196e-11	-0.633229	0.633229	0.0549168	0.0851778	0.073247	0.115668	4.66966e-10	18760040
5530601H04Rik	2.16561e-11	-0.325756	0.325756	0.156527	0.196179	0.188924	0.254175	4.84445e-10	18592542
Sema5a	2.20805e-11	-0.201723	0.201723	0.669532	0.770009	0.521438	0.604862	4.93286e-10	1.84159e+07
Klhl24	2.27109e-11	-0.212076	0.212076	0.462979	0.536294	0.442832	0.540766	5.06442e-10	1.84359e+07
Sft2d1	2.56724e-11	-0.434011	0.434011	0.110488	0.149267	0.14962	0.20555	5.69027e-10	18640797
Gzf1	2.64632e-11	-0.381361	0.381361	0.148372	0.193265	0.190264	0.251719	5.85022e-10	1.85954e+07
Gm6169	2.79273e-11	-0.925481	0.925481	0.0213178	0.0404893	0.031264	0.0613949	6.16584e-10	18871355
Vti1b	2.80042e-11	-0.245084	0.245084	0.340186	0.403176	0.375614	0.460953	6.17478e-10	1.84665e+07
Ywhah	2.86865e-11	-0.221766	0.221766	0.531725	0.620076	0.493077	0.578585	6.31701e-10	1.84267e+07
Magi3	2.88556e-11	-0.421773	0.421773	0.101142	0.135487	0.129745	0.183694	6.34598e-10	18667552
Cyp51	2.90255e-11	-0.395029	0.395029	0.137007	0.18016	0.168825	0.227407	6.37478e-10	18619476
D430042O09Rik	2.92704e-11	-0.331596	0.331596	0.227489	0.286273	0.254578	0.323674	6.41223e-10	18540067
Xrn2	3.02136e-11	-0.201466	0.201466	0.590889	0.679443	0.544439	0.636788	6.61031e-10	1.84151e+07
Aff2	3.45239e-11	-0.484939	0.484939	0.075805	0.106091	0.0908888	0.13777	7.52417e-10	18730186
Mtmr2	3.45791e-11	-0.333511	0.333511	0.184999	0.233113	0.229567	0.296169	7.5265e-10	18562195
Pea15a	3.79838e-11	-0.361242	0.361242	0.17253	0.22162	0.202099	0.265226	8.24637e-10	1.85881e+07
Gnai3	3.92533e-11	-0.207097	0.207097	0.514099	0.593457	0.50469	0.590373	8.51108e-10	18428802
Usp12	4.00239e-11	-0.418647	0.418647	0.128477	0.171731	0.167039	0.22446	8.65599e-10	18625698
Mterf3	4.14037e-11	-0.329303	0.329303	0.194229	0.24403	0.238723	0.306974	8.90889e-10	1.85568e+07
Vps4b	4.24949e-11	-0.243875	0.243875	0.325855	0.385868	0.359536	0.443762	9.12052e-10	18480203
Timm17a	4.24423e-11	-0.216293	0.216293	0.442179	0.5137	0.462707	0.550835	9.12052e-10	18441056
Mocs2	4.35218e-11	-0.225454	0.225454	0.404557	0.472985	0.424073	0.514735	9.3173e-10	1.84535e+07
Nsmce2	4.4922e-11	-0.338034	0.338034	0.194526	0.245887	0.239393	0.30501	9.60492e-10	18558305
Arhgap29	4.52981e-11	-0.302377	0.302377	0.253516	0.312629	0.279589	0.350196	9.67311e-10	18528448
Stfa1	5.08899e-11	-2.93686	2.93686	0.00173237	0.0132655	0.00200983	0.0147348	1.08535e-09	19029660
Shank1	5.11108e-11	-0.264312	0.264312	0.323931	0.389062	0.324029	0.401277	1.08869e-09	1.85022e+07
Myef2	5.1261e-11	-0.249029	0.249029	0.343212	0.407876	0.361769	0.442043	1.09052e-09	18482856
Drp2	5.25284e-11	-0.523911	0.523911	0.0657943	0.0946022	0.0870925	0.132367	1.11608e-09	18741513
Ifnar1	5.28069e-11	-0.271949	0.271949	0.241224	0.291263	0.280482	0.35388	1.12059e-09	18529163
Atp6v0a1	5.45808e-11	-0.316769	0.316769	0.211775	0.263774	0.250335	0.319253	1.15679e-09	18551585
Hibadh	5.58796e-11	-0.241598	0.241598	0.395211	0.467259	0.416481	0.499754	1.17988e-09	18461288
Wdr60	5.60984e-11	-0.335561	0.335561	0.212171	0.267732	0.247432	0.31336	1.18303e-09	1.85551e+07
Eif3j1	5.69012e-11	-0.233648	0.233648	0.386933	0.454957	0.411121	0.49558	1.19846e-09	1.84633e+07
Naa50	5.71376e-11	-0.241363	0.241363	0.361034	0.426782	0.390353	0.473723	1.20195e-09	1.84716e+07
Cep350	5.73664e-11	-0.252348	0.252348	0.311338	0.370848	0.341224	0.418713	1.20526e-09	18494959
Snap23	5.75381e-11	-0.282817	0.282817	0.207636	0.252603	0.250558	0.321955	1.20737e-09	18551285
Angpt4	6.03328e-11	-0.225453	0.225453	0.528669	0.61809	0.342117	0.426572	1.26133e-09	1.84936e+07
Cnmd	6.12691e-11	-1.06759	1.06759	0.0374865	0.078569	0.0276909	0.0557466	1.2773e-09	18889395
Mark3	6.12422e-11	-0.25011	0.25011	0.327322	0.389284	0.355069	0.437132	1.2773e-09	1.84882e+07
Dnm1l	6.13987e-11	-0.244215	0.244215	0.374365	0.443416	0.402188	0.483055	1.2773e-09	18468516
Chchd3	6.13731e-11	-0.241536	0.241536	0.314157	0.371412	0.353506	0.436149	1.2773e-09	18488859
Ogfrl1	6.60753e-11	-0.489997	0.489997	0.111506	0.156604	0.137338	0.189342	1.36955e-09	18668112
Lsm12	6.69183e-11	-0.22245	0.22245	0.469985	0.548337	0.472979	0.555501	1.38532e-09	18446125
Dhx57	6.7116e-11	-0.376023	0.376023	0.1331	0.172732	0.168155	0.226424	1.38772e-09	18630174
Ccdc50	6.84276e-11	-0.220104	0.220104	0.371685	0.432946	0.382983	0.466847	1.41139e-09	1.84773e+07
Fibin	6.97781e-11	-0.908596	0.908596	0.0509876	0.0957148	0.0564984	0.0928291	1.43575e-09	1.88087e+07
Gm12184	7.0013e-11	-0.563143	0.563143	0.0756852	0.111824	0.0991514	0.145874	1.43884e-09	18724055
Ddx23	7.01905e-11	-0.274997	0.274997	0.204735	0.247728	0.245869	0.318026	1.44073e-09	1.85571e+07
Tmem263	7.44227e-11	-0.226788	0.226788	0.442972	0.518378	0.443055	0.526768	1.52391e-09	1.84567e+07
Bcl2l12	7.63246e-11	-0.384543	0.384543	0.136144	0.177728	0.177981	0.236739	1.56097e-09	1.86215e+07
Il1r1	7.9886e-11	-0.403572	0.403572	0.147446	0.195039	0.166816	0.22446	1.62987e-09	18633944
Myh10	8.36339e-11	-0.23349	0.23349	0.498553	0.586137	0.447075	0.527259	1.70223e-09	18457779
Ube2a	8.47096e-11	-0.235073	0.235073	0.403517	0.474926	0.426083	0.512525	1.71999e-09	1.84639e+07
Tcim	8.72631e-11	-0.223049	0.223049	0.554365	0.647053	0.434792	0.517191	1.76972e-09	1.84621e+07
Lgalsl	8.91002e-11	-0.285196	0.285196	0.236815	0.288577	0.268423	0.340619	1.80481e-09	1.85447e+07
Idh2	9.25009e-11	-0.20744	0.20744	0.54117	0.624855	0.510272	0.598723	1.86922e-09	1.84411e+07
Prmt2	9.4748e-11	-0.286772	0.286772	0.22932	0.27975	0.261947	0.334234	1.91111e-09	1.85499e+07
Galnt2	1.00352e-10	-0.261933	0.261933	0.3377	0.404931	0.359089	0.435167	2.01825e-09	1.84952e+07
Copb2	1.00285e-10	-0.206795	0.206795	0.546078	0.63024	0.512282	0.591847	2.01825e-09	1.84429e+07
Plcb1	1.10867e-10	-0.378847	0.378847	0.123021	0.159965	0.137115	0.192289	2.21655e-09	18672267
Fnbp1l	1.13883e-10	-0.229868	0.229868	0.339509	0.398151	0.356632	0.438851	2.27417e-09	1.84969e+07
Notch2	1.22742e-10	-0.211419	0.211419	0.534022	0.618305	0.471416	0.561149	2.43957e-09	18455413
Nos1ap	1.22981e-10	-0.519817	0.519817	0.0777238	0.111438	0.0931219	0.138507	2.44146e-09	18739736
Sra1	1.24088e-10	-0.221799	0.221799	0.497262	0.5799	0.492184	0.575147	2.46054e-09	18450937
Tgfb1i1	1.25909e-10	-0.28754	0.28754	0.28273	0.345088	0.289415	0.361002	2.49374e-09	1.85365e+07
Proca1	1.27754e-10	-0.498213	0.498213	0.0513777	0.0725692	0.061858	0.100933	2.52732e-09	1.88e+07
Exoc6b	1.39359e-10	-0.297044	0.297044	0.229377	0.281819	0.269093	0.336935	2.75047e-09	18551902
Carnmt1	1.49112e-10	-0.215054	0.215054	0.505809	0.587117	0.490621	0.571218	2.9293e-09	18454643
Lsm3	1.49694e-10	-0.231637	0.231637	0.41016	0.481596	0.422287	0.504912	2.93733e-09	18474891
Tnfaip2	1.52429e-10	-0.241448	0.241448	0.372823	0.440743	0.278919	0.350688	2.98408e-09	18545645
Atp13a3	1.53824e-10	-0.308711	0.308711	0.255259	0.316164	0.288745	0.355354	3.00758e-09	1.85412e+07
Kifap3	1.53984e-10	-0.210191	0.210191	0.459877	0.532004	0.459134	0.543713	3.00758e-09	1.84633e+07
Exosc3	1.58852e-10	-0.268656	0.268656	0.215526	0.259641	0.265074	0.336935	3.09908e-09	18555140
Borcs8	1.59377e-10	-0.236804	0.236804	0.338338	0.398691	0.373381	0.456532	3.10575e-09	18494502
Sumf2	1.62408e-10	-0.31354	0.31354	0.140158	0.174182	0.176865	0.237475	3.16118e-09	1.86309e+07
Gm14325	1.77791e-10	-0.549944	0.549944	0.0566786	0.082979	0.0794998	0.121316	3.44474e-09	18768129
Tmem86a	1.7985e-10	-0.258207	0.258207	0.361292	0.432101	0.310406	0.384823	3.48066e-09	18528791
Kdm5c	1.82508e-10	-0.279854	0.279854	0.21158	0.256873	0.253238	0.322937	3.52003e-09	1.85658e+07
Slc30a9	1.88775e-10	-0.28018	0.28018	0.213074	0.258746	0.257034	0.32613	3.62029e-09	1.85639e+07
Washc3	1.88601e-10	-0.226565	0.226565	0.348922	0.408255	0.38343	0.466601	3.62029e-09	18492984
Gfpt1	1.92076e-10	-0.227469	0.227469	0.3711	0.434476	0.38812	0.469794	3.67943e-09	1.84917e+07
Crabp2	1.93296e-10	-0.367214	0.367214	0.211859	0.273269	0.212372	0.272839	3.69861e-09	18601133
Nck1	1.9552e-10	-0.238924	0.238924	0.308239	0.363757	0.34435	0.422642	3.73273e-09	1.85117e+07
Ide	1.9795e-10	-0.257603	0.257603	0.301737	0.360724	0.332738	0.40447	3.77063e-09	18519131
Mrps6	1.97895e-10	-0.239141	0.239141	0.408944	0.482673	0.403528	0.47888	3.77063e-09	1.84874e+07
Trnt1	2.00469e-10	-0.288483	0.288483	0.217106	0.265164	0.261277	0.329077	3.81004e-09	1.85623e+07
Tmem159	2.04621e-10	-0.305331	0.305331	0.231026	0.285479	0.256364	0.3222	3.88024e-09	1.85665e+07
Trmt10c	2.25435e-10	-0.371361	0.371361	0.138526	0.179193	0.182001	0.239686	4.26062e-09	1.86314e+07
Smad4	2.2998e-10	-0.217882	0.217882	0.447335	0.520261	0.4569	0.54666	4.34168e-09	1.84698e+07
Aggf1	2.4393e-10	-0.270297	0.270297	0.197436	0.238119	0.245199	0.312132	4.59479e-09	1.85765e+07
Mgst3	2.44818e-10	-0.256493	0.256493	0.29072	0.347285	0.295444	0.371071	4.60639e-09	1.85415e+07
2010320M18Rik	2.46275e-10	-0.281393	0.281393	0.232061	0.282039	0.277579	0.348477	4.62865e-09	18553638
Kif26b	2.47448e-10	-0.257358	0.257358	0.339543	0.405852	0.318446	0.390963	4.64555e-09	18529698
Dnajc25	2.60995e-10	-0.288974	0.288974	0.198295	0.242271	0.240732	0.30501	4.88905e-09	1.85816e+07
Glod4	2.71479e-10	-0.220049	0.220049	0.406396	0.473359	0.425413	0.513752	5.07981e-09	18482499
Gcc2	2.74159e-10	-0.219619	0.219619	0.406595	0.47345	0.415811	0.49779	5.1243e-09	18486969
Ramp1	2.80944e-10	-0.791852	0.791852	0.0501673	0.0868544	0.0605181	0.0967583	5.24532e-09	1.88117e+07
Stau2	2.84191e-10	-0.308187	0.308187	0.191975	0.237694	0.226887	0.291503	5.29427e-09	1.8593e+07
Smg6	2.97841e-10	-0.262905	0.262905	0.280051	0.336031	0.318446	0.390963	5.52425e-09	1.85325e+07
Heatr5a	3.1303e-10	-0.326837	0.326837	0.172053	0.2158	0.204779	0.266454	5.79328e-09	1.86134e+07
Steap2	3.13885e-10	-0.319815	0.319815	0.152944	0.1909	0.182001	0.240914	5.80277e-09	1.8635e+07
Med30	3.15312e-10	-0.233886	0.233886	0.321822	0.378462	0.363555	0.442043	5.82279e-09	1.85103e+07
Map1b	3.26805e-10	-0.260838	0.260838	0.411671	0.493253	0.332291	0.402996	6.02845e-09	1.85272e+07
Zfp433	3.41565e-10	-1.0099	1.0099	0.0241327	0.0485977	0.0357302	0.0650786	6.29386e-09	18876152
Gm9774	3.48794e-10	-0.827899	0.827899	0.0376358	0.0668073	0.0515855	0.0854617	6.42008e-09	18834123
Gulp1	3.68727e-10	-0.249215	0.249215	0.278175	0.330628	0.305047	0.378438	6.77226e-09	1.85427e+07
Ppm1e	3.77176e-10	-0.435579	0.435579	0.111244	0.150452	0.132649	0.183202	6.91244e-09	1.8694e+07
Car10	3.85965e-10	-1.5407	1.5407	0.00852284	0.024796	0.0096025	0.0277505	7.06588e-09	18980273
Dhrs3	3.87915e-10	-0.271509	0.271509	0.300746	0.363022	0.302814	0.371562	7.0939e-09	1.8546e+07
St8sia4	3.89829e-10	-0.551224	0.551224	0.0852966	0.124988	0.0931219	0.136051	7.12121e-09	18752715
Zfp652	4.03161e-10	-0.227604	0.227604	0.307908	0.360526	0.334524	0.412083	7.34889e-09	1.85277e+07
Vcl	4.11017e-10	-0.273743	0.273743	0.315859	0.381854	0.319116	0.38998	7.476e-09	1.85374e+07
Cebpz	4.30224e-10	-0.214993	0.214993	0.432764	0.502308	0.440598	0.528487	7.81696e-09	1.84853e+07
Etfbkmt	4.30938e-10	-0.423144	0.423144	0.11532	0.154627	0.125056	0.176081	7.82155e-09	1.87045e+07
Iqcb1	4.36616e-10	-0.386238	0.386238	0.153811	0.201028	0.176195	0.232564	7.91612e-09	18645821
Nebl	4.39003e-10	-0.479222	0.479222	0.101991	0.142175	0.107637	0.153978	7.94238e-09	1.87305e+07
Galnt10	4.49506e-10	-0.405686	0.405686	0.118619	0.157137	0.155203	0.207515	8.10642e-09	18669461
Syt1	4.63062e-10	-1.60551	1.60551	0.00856521	0.0260642	0.00982582	0.0279961	8.32431e-09	1.898e+07
Cfap36	4.68416e-10	-0.230861	0.230861	0.353867	0.415275	0.384547	0.466847	8.41162e-09	1.85072e+07
Txnrd1	4.75529e-10	-0.263948	0.263948	0.275489	0.330796	0.313086	0.386297	8.53031e-09	18542238
Cenpv	4.8853e-10	-0.305907	0.305907	0.198656	0.245578	0.236713	0.301326	8.74501e-09	1.85931e+07
Ubn1	5.00393e-10	-0.223075	0.223075	0.378113	0.441341	0.404422	0.48502	8.9479e-09	1.8501e+07
Armcx1	5.03211e-10	-0.24144	0.24144	0.348625	0.412134	0.371594	0.447446	8.9888e-09	18514808
Anxa3	5.14066e-10	-0.320336	0.320336	0.230084	0.287288	0.220411	0.28168	9.16336e-09	18607371
Gmds	6.01051e-10	-0.279517	0.279517	0.225165	0.273302	0.258821	0.324656	1.06467e-08	1.85802e+07
Ctdspl2	6.09843e-10	-0.258368	0.258368	0.29179	0.349017	0.329611	0.399558	1.07798e-08	1.85383e+07
Nav3	6.47093e-10	-0.513476	0.513476	0.1265	0.180577	0.108977	0.154224	1.14145e-08	18733402
Rell1	6.60074e-10	-0.339484	0.339484	0.142159	0.179874	0.179321	0.235511	1.16313e-08	1.86481e+07
Batf	6.71999e-10	-0.320241	0.320241	0.172988	0.215983	0.18736	0.248772	1.18169e-08	1.86387e+07
Fuom	6.71532e-10	-0.301522	0.301522	0.203196	0.250428	0.23649	0.300344	1.18169e-08	1.85979e+07
Snx30	6.76416e-10	-0.512682	0.512682	0.0948062	0.13526	0.125949	0.172642	1.18699e-08	18710927
Col26a1	6.78575e-10	-0.251334	0.251334	0.291569	0.347057	0.272666	0.343566	1.18954e-08	18571470
Zfp60	6.87088e-10	-0.308338	0.308338	0.141954	0.175779	0.171952	0.230354	1.20074e-08	18654678
Ppox	7.05734e-10	-0.356167	0.356167	0.127036	0.162609	0.152747	0.20776	1.23205e-08	18676123
Ppp1r9a	7.12737e-10	-0.307159	0.307159	0.176483	0.218357	0.193167	0.25442	1.243e-08	1.86344e+07
Slc25a39	7.13507e-10	-0.226485	0.226485	0.415207	0.485784	0.435462	0.515963	1.24306e-08	18496357
Hook1	7.40733e-10	-0.45576	0.45576	0.093746	0.128573	0.0955784	0.140226	1.28652e-08	18754183
Erg	7.44832e-10	-0.765526	0.765526	0.030589	0.0520011	0.0314873	0.0594303	1.29199e-08	18894177
Odr4	7.4541e-10	-0.211251	0.211251	0.322574	0.373442	0.347477	0.425344	1.29199e-08	1.85312e+07
Sgcb	7.84835e-10	-0.322992	0.322992	0.171226	0.21419	0.212818	0.272348	1.35894e-08	1.86198e+07
Vamp3	8.59222e-10	-0.274952	0.274952	0.228088	0.275976	0.273783	0.340619	1.4847e-08	18575459
Ercc6l2	8.88343e-10	-0.298388	0.298388	0.208938	0.256946	0.246315	0.308694	1.53034e-08	18595407
Hpf1	9.09512e-10	-0.214414	0.214414	0.44106	0.511732	0.445511	0.530206	1.56521e-08	18496734
Epas1	9.26188e-10	-0.351344	0.351344	0.219401	0.2799	0.205672	0.264489	1.59229e-08	18628191
Tceanc2	9.31857e-10	-0.343527	0.343527	0.132857	0.168576	0.166816	0.22225	1.60041e-08	1.86649e+07
Srpx	9.47158e-10	-0.334388	0.334388	0.199948	0.252103	0.211478	0.270629	1.62504e-08	18623613
Mrpl27	9.57323e-10	-0.200191	0.200191	0.478488	0.549711	0.488164	0.571464	1.64082e-08	1.84862e+07
Carmn	9.77499e-10	-0.662185	0.662185	0.0408086	0.0645787	0.0513622	0.084725	1.67109e-08	1.88432e+07
Triqk	9.78933e-10	-0.302292	0.302292	0.160021	0.197322	0.194506	0.253193	1.67109e-08	1.86385e+07
Anxa1	9.78611e-10	-0.228557	0.228557	0.482691	0.565551	0.42452	0.499263	1.67109e-08	1.85061e+07
Fam174a	9.83657e-10	-0.217951	0.217951	0.417448	0.485525	0.435909	0.516454	1.67747e-08	1.85016e+07
Zfp62	9.91209e-10	-0.246225	0.246225	0.225269	0.267191	0.259268	0.330059	1.68865e-08	18585577
Creg1	1.00323e-09	-0.207244	0.207244	0.414931	0.47903	0.427423	0.505648	1.7074e-08	18504975
Ola1	1.01808e-09	-0.201243	0.201243	0.428596	0.492751	0.440375	0.525049	1.73038e-08	1.85002e+07
Rnf130	1.01877e-09	-0.200851	0.200851	0.491214	0.56459	0.481242	0.566552	1.73038e-08	18488762
Dync1li2	1.07752e-09	-0.237737	0.237737	0.274967	0.324225	0.31264	0.385069	1.82467e-08	1.85552e+07
Rnf180	1.12748e-09	-0.436507	0.436507	0.0991371	0.134165	0.11188	0.158644	1.90737e-08	18734466
Csnk1g3	1.13941e-09	-0.215168	0.215168	0.386251	0.448375	0.401519	0.480108	1.92563e-08	1.85159e+07
Pum3	1.22077e-09	-0.269859	0.269859	0.249313	0.300594	0.294998	0.361739	2.05697e-08	1.85682e+07
Apip	1.22558e-09	-0.234556	0.234556	0.319537	0.37595	0.363778	0.440324	2.06302e-08	18532250
St6galnac6	1.2315e-09	-0.277439	0.277439	0.201124	0.24377	0.232916	0.297642	2.06887e-08	18608797
Gm35082	1.24005e-09	-1.4731	1.4731	0.00502824	0.0139593	0.00647611	0.0218566	2.08117e-08	1.90058e+07
Mras	1.24352e-09	-0.245225	0.245225	0.307833	0.364868	0.334971	0.408399	2.08493e-08	1.85461e+07
Rbbp9	1.25302e-09	-0.242915	0.242915	0.233017	0.275748	0.271103	0.339145	2.09878e-08	1.85824e+07
Isca1	1.3264e-09	-0.253913	0.253913	0.245994	0.293332	0.288298	0.357564	2.2173e-08	1.85726e+07
Ddx46	1.40276e-09	-0.203187	0.203187	0.4261	0.490542	0.439705	0.51891	2.33802e-08	1.85066e+07
Fcho2	1.40592e-09	-0.201288	0.201288	0.406766	0.467669	0.414247	0.493369	2.34099e-08	18514872
Fdps	1.42057e-09	-0.325547	0.325547	0.217236	0.272227	0.242519	0.302554	2.36306e-08	1.86056e+07
Dbn1	1.45043e-09	-0.296677	0.296677	0.228797	0.281034	0.26619	0.327358	2.408e-08	1.85897e+07
Dab2	1.52582e-09	-0.388246	0.388246	0.170822	0.223572	0.195176	0.249263	2.53069e-08	18645671
Fbxo17	1.56816e-09	-0.39662	0.39662	0.0948561	0.124871	0.121036	0.168468	2.59835e-08	1.8726e+07
Snx24	1.57002e-09	-0.326324	0.326324	0.147468	0.184898	0.183117	0.23944	2.59889e-08	18655768
Rap2c	1.59037e-09	-0.270009	0.270009	0.26937	0.324811	0.293881	0.360756	2.63001e-08	18572835
Sh3pxd2b	1.62775e-09	-0.208536	0.208536	0.416386	0.48114	0.400849	0.479862	2.68659e-08	1.8522e+07
Creb5	1.722e-09	-0.338456	0.338456	0.166063	0.209971	0.170389	0.225688	2.83661e-08	1.86693e+07
Ppp1r35	1.73165e-09	-0.258521	0.258521	0.218788	0.261725	0.263287	0.331532	2.84973e-08	18592008
Atp7a	1.77929e-09	-0.390468	0.390468	0.10653	0.139642	0.135552	0.184676	2.92529e-08	18709183
Nrp2	1.82911e-09	-0.33615	0.33615	0.293818	0.370911	0.263287	0.319253	3.00137e-08	1.85966e+07
Erlin1	1.93722e-09	-0.523033	0.523033	0.0611471	0.0878667	0.0899955	0.130648	3.17262e-08	18774977
Irak1bp1	1.94991e-09	-0.224834	0.224834	0.352172	0.411564	0.371371	0.446218	3.19032e-08	18537025
Col5a1	2.03464e-09	-0.216874	0.216874	0.667551	0.775836	0.516302	0.585707	3.31932e-08	18494341
Hist1h1b	2.10795e-09	-0.43253	0.43253	0.140674	0.189854	0.0897722	0.131385	3.43562e-08	18775474
Hmbs	2.16178e-09	-0.297507	0.297507	0.18862	0.231817	0.238053	0.301326	3.51996e-08	1.86137e+07
Ift74	2.18169e-09	-0.236652	0.236652	0.268285	0.316108	0.31331	0.381876	3.54216e-08	18566838
Pth1r	2.31871e-09	-0.252496	0.252496	0.310511	0.369901	0.327155	0.395629	3.75742e-08	18560883
Asxl3	2.39113e-09	-0.240446	0.240446	0.223861	0.26446	0.23582	0.302063	3.87107e-08	18615715
Kdelr3	2.40234e-09	-0.233072	0.233072	0.294099	0.345665	0.308173	0.379666	3.8855e-08	1.85703e+07
Pitpnb	2.41654e-09	-0.227004	0.227004	0.333915	0.390815	0.372264	0.445727	3.90475e-08	1.85405e+07
Cdk5rap2	2.51449e-09	-0.262177	0.262177	0.265664	0.318607	0.290755	0.35609	4.05914e-08	1.85821e+07
Rfk	2.74069e-09	-0.228353	0.228353	0.290617	0.340457	0.316213	0.388998	4.40749e-08	18567948
Nudt14	2.87113e-09	-0.346172	0.346172	0.144684	0.18392	0.189594	0.245088	4.60851e-08	18658394
Unc80	3.03337e-09	-0.922267	0.922267	0.0197558	0.0374391	0.0194283	0.0415029	4.85512e-08	18946132
Ptger2	3.12712e-09	-0.46081	0.46081	0.0877552	0.120779	0.0886556	0.129912	5.00044e-08	18781373
P2ry1	3.15061e-09	-0.725797	0.725797	0.0301377	0.0498422	0.0424297	0.0722004	5.03324e-08	18875269
Shld2	3.43804e-09	-0.441584	0.441584	0.0878656	0.11933	0.120143	0.164538	5.47178e-08	1.87377e+07
Rpl39l	3.45762e-09	-0.338767	0.338767	0.181522	0.229567	0.181331	0.236248	5.49262e-08	18668404
Zfp9	3.53762e-09	-0.252892	0.252892	0.232318	0.276828	0.271326	0.334725	5.61444e-08	1.85992e+07
Ppp1r3c	3.60337e-09	-0.367478	0.367478	0.138908	0.179204	0.143368	0.193762	5.70276e-08	18708300
Dkk2	3.65942e-09	-0.413632	0.413632	0.133589	0.177945	0.104734	0.148084	5.78606e-08	18758862
Spa17	3.74495e-09	-0.419638	0.419638	0.114498	0.153151	0.134212	0.181974	5.91024e-08	18720250
Zhx3	4.03554e-09	-0.307318	0.307318	0.143564	0.177646	0.173962	0.228635	6.34521e-08	18677250
Rmdn1	4.23374e-09	-0.335283	0.335283	0.151063	0.190585	0.188924	0.243615	6.63834e-08	18664551
Lrrn1	4.24856e-09	-0.512157	0.512157	0.0848864	0.121063	0.0937919	0.134332	6.65542e-08	18777489
Nid2	4.34696e-09	-0.25002	0.25002	0.243598	0.289693	0.251005	0.316061	6.797e-08	18614625
Plekha8	4.49823e-09	-0.398576	0.398576	0.119115	0.157019	0.158776	0.208497	7.02056e-08	18695457
Tmem87a	4.53453e-09	-0.265765	0.265765	0.192737	0.231723	0.228674	0.289784	7.07069e-08	1.86318e+07
Sspn	4.64816e-09	-0.243782	0.243782	0.252696	0.299216	0.282492	0.346758	7.24121e-08	18596590
Pabpc4	4.73162e-09	-0.279512	0.279512	0.230453	0.27972	0.274676	0.336444	7.35769e-08	18602136
Rpf1	4.72778e-09	-0.260712	0.260712	0.180967	0.216811	0.221974	0.281434	7.35769e-08	18637884
Eif2s1	4.75096e-09	-0.200618	0.200618	0.431655	0.496054	0.444618	0.522102	7.38099e-08	1.85265e+07
Dll1	4.83889e-09	-0.414585	0.414585	0.116851	0.155753	0.122823	0.168713	7.5107e-08	18737552
Gm43305	4.885e-09	-1.14912	1.14912	0.0117513	0.026062	0.0198749	0.0415029	7.56839e-08	1.8948e+07
Echdc1	4.99886e-09	-0.499529	0.499529	0.0744429	0.105244	0.100938	0.142436	7.73066e-08	18768556
2610306M01Rik	5.03069e-09	-0.517136	0.517136	0.0519308	0.0743188	0.0692273	0.105599	7.77279e-08	18820704
Dpep1	5.0667e-09	-0.427587	0.427587	0.21744	0.292453	0.159893	0.20776	7.82129e-08	1.86967e+07
Cntn3	5.216e-09	-0.803034	0.803034	0.0272761	0.0475904	0.0301474	0.0557466	8.0225e-08	1.89134e+07
Dhx29	5.28489e-09	-0.343525	0.343525	0.119995	0.152256	0.159669	0.209971	8.12108e-08	18696359
Tmem8b	5.41508e-09	-0.467766	0.467766	0.0624387	0.0863506	0.0761501	0.114194	8.30607e-08	1.88086e+07
Psmg1	5.46132e-09	-0.26781	0.26781	0.223415	0.268986	0.27289	0.335953	8.36942e-08	1.8605e+07
Agfg1	5.52605e-09	-0.28115	0.28115	0.200688	0.243868	0.248548	0.308202	8.4533e-08	18621526
Acsl3	5.60228e-09	-0.209105	0.209105	0.34527	0.399122	0.358196	0.433448	8.56218e-08	1.85599e+07
Slc16a9	5.70214e-09	-0.648715	0.648715	0.0446037	0.0699284	0.0582849	0.0913556	8.70695e-08	18844260
Fam234a	5.80507e-09	-0.20912	0.20912	0.369684	0.427348	0.357972	0.432711	8.85613e-08	1.85607e+07
Tmem50b	5.81792e-09	-0.307877	0.307877	0.172356	0.213357	0.198079	0.25442	8.86775e-08	18660573
Nup37	5.89746e-09	-0.326433	0.326433	0.149381	0.18731	0.191827	0.245334	8.97283e-08	1.86671e+07
Fam76b	6.28853e-09	-0.235047	0.235047	0.237247	0.279226	0.275569	0.341601	9.53357e-08	1.86048e+07
Agps	6.62301e-09	-0.308468	0.308468	0.145041	0.179618	0.188924	0.241896	1.00227e-07	1.86714e+07
Enpp3	6.76576e-09	-0.619212	0.619212	0.0531838	0.0816922	0.0538187	0.0861984	1.02296e-07	18854905
Grb14	7.13268e-09	-0.443775	0.443775	0.112084	0.152452	0.126396	0.170923	1.07651e-07	1.87386e+07
Trip4	7.27415e-09	-0.263728	0.263728	0.196408	0.235803	0.238053	0.298379	1.09591e-07	1.86325e+07
Tpd52l1	7.28175e-09	-0.242894	0.242894	0.368831	0.436462	0.353953	0.418959	1.096e-07	18568132
Tgs1	7.2877e-09	-0.239833	0.239833	0.259192	0.306069	0.301474	0.366159	1.096e-07	1.85931e+07
Acta2	7.43389e-09	-0.388024	0.388024	0.22418	0.293362	0.11456	0.15889	1.117e-07	18753464
Hint3	7.48232e-09	-0.264434	0.264434	0.213306	0.256216	0.255918	0.317534	1.12328e-07	18620741
4930430F08Rik	7.6766e-09	-0.424064	0.424064	0.0729815	0.0979194	0.096025	0.137033	1.15142e-07	1.87802e+07
Bloc1s6	8.07732e-09	-0.359033	0.359033	0.13764	0.176532	0.179321	0.229862	1.20938e-07	1.86834e+07
Spcs3	8.22458e-09	-0.274404	0.274404	0.229856	0.278009	0.274006	0.334234	1.23034e-07	1.86116e+07
Pstk	8.31117e-09	-0.235772	0.235772	0.229249	0.26995	0.269763	0.334234	1.2422e-07	1.8613e+07
Vmn1r13	8.32345e-09	-1.48347	1.48347	0.00982023	0.0274594	0.0109424	0.0279961	1.24294e-07	18990114
Rras	8.46207e-09	-0.309225	0.309225	0.199289	0.246927	0.225324	0.283644	1.26253e-07	18644307
Fkbp11	8.50022e-09	-0.216542	0.216542	0.339112	0.39403	0.34167	0.413802	1.2671e-07	1.85746e+07
Stbd1	9.18385e-09	-0.331532	0.331532	0.180559	0.227207	0.194953	0.248281	1.36301e-07	1.86707e+07
Tec	9.38587e-09	-0.897095	0.897095	0.0268902	0.050078	0.042653	0.0709725	1.38991e-07	1.88846e+07
Egfem1	9.45733e-09	-0.48274	0.48274	0.0529768	0.0740295	0.0569451	0.0903733	1.39747e-07	1.88508e+07
Mkrn2	9.5737e-09	-0.337586	0.337586	0.133356	0.168514	0.174185	0.225688	1.41344e-07	1.86899e+07
Ehbp1	9.95658e-09	-0.296248	0.296248	0.149332	0.183372	0.177088	0.230599	1.46868e-07	18686998
Cdkl3	1.0089e-08	-0.394319	0.394319	0.105287	0.138381	0.133988	0.179519	1.48434e-07	18733639
Lcorl	1.00833e-08	-0.350492	0.350492	0.131093	0.167143	0.165476	0.215128	1.48434e-07	18699471
Uchl3	1.01933e-08	-0.20798	0.20798	0.254436	0.293891	0.292765	0.362475	1.49708e-07	1.86019e+07
Reps2	1.02451e-08	-0.651806	0.651806	0.0245455	0.0385643	0.034837	0.0613949	1.50338e-07	18905136
AU041133	1.05739e-08	-0.376035	0.376035	0.102902	0.133543	0.127289	0.173625	1.5503e-07	1.87413e+07
Sdf2l1	1.06004e-08	-0.359761	0.359761	0.132663	0.170235	0.171505	0.222495	1.55283e-07	18693951
Gid8	1.08815e-08	-0.254081	0.254081	0.24451	0.291597	0.294998	0.357073	1.59126e-07	1.86037e+07
Tmem29	1.11064e-08	-0.238708	0.238708	0.280428	0.330887	0.316436	0.381876	1.61715e-07	1.85922e+07
Abce1	1.11566e-08	-0.230895	0.230895	0.340258	0.399314	0.372934	0.437132	1.62308e-07	18567777
Insc	1.1386e-08	-0.24322	0.24322	0.248599	0.29425	0.254578	0.318762	1.6522e-07	1.86273e+07
Cdpf1	1.18332e-08	-0.381563	0.381563	0.101773	0.132586	0.140241	0.18664	1.71562e-07	1.87284e+07
Cntn4	1.19065e-08	-1.28694	1.28694	0.00620548	0.015142	0.00692273	0.0213654	1.72476e-07	1.90144e+07
Nans	1.19675e-08	-0.259667	0.259667	0.20685	0.247642	0.251452	0.314833	1.73211e-07	18630247
Ugp2	1.21452e-08	-0.269203	0.269203	0.257947	0.310862	0.303037	0.363949	1.75483e-07	18601530
Vamp4	1.24509e-08	-0.237568	0.237568	0.283541	0.334295	0.321572	0.386297	1.79441e-07	18591798
Dera	1.26864e-08	-0.379517	0.379517	0.118031	0.153547	0.164136	0.213163	1.8268e-07	18704054
Dzip1	1.29073e-08	-0.222394	0.222394	0.280246	0.326954	0.302367	0.369352	1.85546e-07	1.86014e+07
Kazald1	1.29802e-08	-0.233634	0.233634	0.351892	0.413753	0.322242	0.388507	1.86436e-07	18591821
Exosc4	1.32135e-08	-0.210315	0.210315	0.360664	0.417267	0.401742	0.477898	1.89464e-07	18558155
Lst1	1.34126e-08	-0.308106	0.308106	0.159296	0.197221	0.173738	0.225933	1.91994e-07	1.86946e+07
Rgs9	1.35051e-08	-1.04726	1.04726	0.0215477	0.0445306	0.0265744	0.0498527	1.9306e-07	18932161
Kctd6	1.35099e-08	-0.303396	0.303396	0.134374	0.165823	0.163466	0.215373	1.9306e-07	1.87042e+07
Brms1l	1.35757e-08	-0.310833	0.310833	0.145143	0.180039	0.18736	0.239194	1.93837e-07	18683065
1700029J07Rik	1.36471e-08	-0.371754	0.371754	0.105695	0.136762	0.122376	0.16724	1.94365e-07	18750835
Bmp2k	1.46442e-08	-0.345509	0.345509	0.111333	0.14146	0.141358	0.188114	2.07866e-07	18729675
Gon4l	1.47918e-08	-0.242373	0.242373	0.220984	0.26141	0.268423	0.330305	2.09786e-07	18623607
Rbm27	1.49359e-08	-0.213363	0.213363	0.261429	0.303097	0.300804	0.367878	2.11653e-07	1.86045e+07
Tspan18	1.50857e-08	-0.345122	0.345122	0.148998	0.189266	0.162573	0.213163	2.13418e-07	18707125
Wdr75	1.52327e-08	-0.277213	0.277213	0.167547	0.203043	0.212595	0.268418	2.15317e-07	1.86631e+07
Thg1l	1.53251e-08	-0.316958	0.316958	0.110449	0.137586	0.15096	0.200393	2.16443e-07	1.87191e+07
Acadvl	1.57225e-08	-0.225788	0.225788	0.252605	0.295401	0.294328	0.358546	2.21501e-07	18609475
Ctxn2	1.57719e-08	-0.826575	0.826575	0.0289708	0.0513788	0.031264	0.0562377	2.22013e-07	1.89188e+07
S100a16	1.58564e-08	-0.251904	0.251904	0.273263	0.325395	0.2749	0.336198	2.23017e-07	1.86211e+07
Caml	1.5934e-08	-0.200255	0.200255	0.284443	0.326797	0.322465	0.393418	2.23922e-07	18594089
Babam2	1.61235e-08	-0.246054	0.246054	0.21119	0.250463	0.253461	0.31557	2.26209e-07	18633982
Arl5a	1.62861e-08	-0.230016	0.230016	0.276416	0.324194	0.317329	0.382367	2.28302e-07	1.85982e+07
Hspb1	1.65138e-08	-0.218716	0.218716	0.365713	0.425579	0.321795	0.388752	2.31112e-07	18595897
4930458D05Rik	1.68122e-08	-1.36527	1.36527	0.00847456	0.0218326	0.0102724	0.0265226	2.35094e-07	18997536
Ifrd1	1.80862e-08	-0.250517	0.250517	0.223603	0.266006	0.261947	0.323428	2.51868e-07	18630759
Vps13c	1.86623e-08	-0.246089	0.246089	0.196197	0.232687	0.231353	0.290029	2.59464e-07	18651763
Fam13a	1.9254e-08	-0.240804	0.240804	0.30987	0.366158	0.279142	0.342092	2.67252e-07	1.86214e+07
Aco1	1.92847e-08	-0.274205	0.274205	0.151553	0.183277	0.195176	0.250246	2.67458e-07	18680330
Hist1h3f	1.97046e-08	-1.09017	1.09017	0.0154237	0.0328369	0.0238946	0.0459234	2.72612e-07	1.89437e+07
Copg2	1.9832e-08	-0.259629	0.259629	0.188713	0.225921	0.224207	0.283153	2.74151e-07	1.86576e+07
Abhd8	2.10637e-08	-0.223908	0.223908	0.287362	0.335608	0.328048	0.397348	2.89939e-07	1.85966e+07
Vapb	2.10631e-08	-0.204218	0.204218	0.371062	0.427487	0.405315	0.473232	2.89939e-07	18566568
Rab6b	2.12355e-08	-0.832074	0.832074	0.0266282	0.0474046	0.034167	0.0596758	2.91885e-07	1.89132e+07
Ppm1m	2.33596e-08	-0.256391	0.256391	0.151442	0.180896	0.190487	0.244106	3.20042e-07	18687418
Sucla2	2.38811e-08	-0.228553	0.228553	0.268835	0.314983	0.314873	0.379912	3.26921e-07	1.86058e+07
Bmt2	2.39804e-08	-0.373169	0.373169	0.136011	0.176161	0.172175	0.221022	3.28016e-07	1.87053e+07
2610008E11Rik	2.43203e-08	-0.24186	0.24186	0.22127	0.261655	0.256141	0.31778	3.32397e-07	1.86389e+07
1190007I07Rik	2.53556e-08	-0.323986	0.323986	0.124221	0.155498	0.160563	0.209234	3.45988e-07	1.87168e+07
Adamts4	2.58428e-08	-0.480477	0.480477	0.061628	0.0859838	0.081063	0.117387	3.52069e-07	1.88178e+07
Tnn	2.62928e-08	-0.403205	0.403205	0.195804	0.258939	0.129075	0.174116	3.57455e-07	1.87511e+07
Arsk	2.63015e-08	-0.319953	0.319953	0.131363	0.16398	0.15565	0.204568	3.57455e-07	1.87219e+07
F3	2.67392e-08	-0.495682	0.495682	0.0645713	0.0910447	0.0757034	0.111248	3.62532e-07	18826847
Col4a2	2.67289e-08	-0.314927	0.314927	0.399097	0.496456	0.30862	0.361248	3.62532e-07	18613698
Mpp1	2.67013e-08	-0.272629	0.272629	0.193428	0.233663	0.237159	0.294941	3.62532e-07	1.86536e+07
Bmf	2.68017e-08	-0.472019	0.472019	0.0981574	0.136149	0.111657	0.15275	3.63088e-07	1.87737e+07
Sgpl1	2.68584e-08	-0.256872	0.256872	0.174954	0.20905	0.211478	0.268173	3.63566e-07	18672030
Rb1	2.94474e-08	-0.335836	0.335836	0.13187	0.166434	0.163019	0.211444	3.96411e-07	1.87166e+07
Rbfa	2.94487e-08	-0.282476	0.282476	0.133617	0.162515	0.171728	0.222986	3.96411e-07	18707550
Acsl4	2.969e-08	-0.306853	0.306853	0.134154	0.165949	0.163466	0.212917	3.99341e-07	18715892
Asah2	3.08464e-08	-0.386956	0.386956	0.113402	0.148288	0.134435	0.178782	4.14565e-07	1.87476e+07
Hacd2	3.11164e-08	-0.2538	0.2538	0.162708	0.194004	0.202322	0.258104	4.17863e-07	18681410
Ccpg1	3.11878e-08	-0.206366	0.206366	0.338736	0.390826	0.350603	0.422888	4.1849e-07	1.8593e+07
Rrm2b	3.14143e-08	-0.31167	0.31167	0.122589	0.15215	0.151854	0.199902	4.21004e-07	1.87283e+07
Hddc2	3.14249e-08	-0.211391	0.211391	0.363742	0.421142	0.389236	0.459234	4.21004e-07	18578911
Plaat3	3.3155e-08	-0.278535	0.278535	0.226731	0.275016	0.237383	0.293959	4.42782e-07	18657203
0610009L18Rik	3.33344e-08	-0.435109	0.435109	0.086608	0.117095	0.11188	0.152996	4.44477e-07	1.8776e+07
Fh1	3.35071e-08	-0.223145	0.223145	0.289388	0.337796	0.329835	0.395874	4.46077e-07	18604419
Esco1	3.4329e-08	-0.256708	0.256708	0.177697	0.212303	0.214381	0.270138	4.563e-07	18673902
Ccdc80	3.45139e-08	-0.388851	0.388851	0.183216	0.239894	0.161009	0.20776	4.58399e-07	18721400
Mphosph6	3.5107e-08	-0.231217	0.231217	0.223129	0.261914	0.270657	0.331041	4.65911e-07	1.86366e+07
Rbm28	3.52287e-08	-0.201883	0.201883	0.305679	0.351592	0.341447	0.411591	4.6716e-07	18599375
Rhobtb3	3.53624e-08	-0.219091	0.219091	0.233546	0.271847	0.27423	0.338163	4.68565e-07	1.86337e+07
Qpct	3.58843e-08	-0.281179	0.281179	0.142603	0.173289	0.159223	0.208251	4.73997e-07	1.87226e+07
Stam2	3.58306e-08	-0.277846	0.277846	0.180054	0.218295	0.22577	0.280206	4.73997e-07	18666930
Ciapin1	3.58775e-08	-0.209963	0.209963	0.290888	0.336458	0.326485	0.395874	4.73997e-07	18606384
Fam136a	3.60114e-08	-0.211687	0.211687	0.316954	0.367046	0.359982	0.428291	4.75306e-07	18592536
Atp6v1c1	3.90582e-08	-0.250317	0.250317	0.200101	0.238014	0.238053	0.295678	5.12618e-07	18658989
Slk	3.90806e-08	-0.224456	0.224456	0.27268	0.318582	0.30862	0.37279	5.12618e-07	18617371
E430024I08Rik	3.9547e-08	-0.317752	0.317752	0.113763	0.141793	0.133542	0.179764	5.17325e-07	1.87508e+07
Tbc1d12	3.95616e-08	-0.300734	0.300734	0.134392	0.16554	0.172845	0.222495	5.17325e-07	18711343
Atp1a2	3.97405e-08	-0.630514	0.630514	0.0593609	0.0918977	0.0520322	0.081778	5.19264e-07	1.88759e+07
Zdhhc5	4.29672e-08	-0.241815	0.241815	0.219663	0.259746	0.265297	0.324411	5.59698e-07	18643290
Pde8a	4.57809e-08	-0.523298	0.523298	0.0642233	0.0923042	0.0844127	0.119843	5.94064e-07	18819415
Habp4	4.72331e-08	-0.287717	0.287717	0.135442	0.165335	0.173292	0.223477	6.11503e-07	18713215
Tbc1d32	4.73275e-08	-0.316765	0.316765	0.12552	0.156339	0.150067	0.197446	6.12257e-07	1.87358e+07
Nipsnap2	4.79309e-08	-0.222035	0.222035	0.245827	0.286727	0.284949	0.348969	6.19589e-07	1.86329e+07
Srp54c	5.0754e-08	-0.71003	0.71003	0.0195776	0.0320258	0.0279142	0.050835	6.54583e-07	1.89378e+07
Clic4	5.08665e-08	-0.220894	0.220894	0.270976	0.31581	0.293881	0.358546	6.55536e-07	18629060
Usp3	5.28719e-08	-0.239095	0.239095	0.230505	0.272055	0.270433	0.328831	6.80344e-07	1.86439e+07
Atrip	5.35414e-08	-0.327753	0.327753	0.113604	0.142579	0.144931	0.190324	6.88436e-07	18743378
Loxl2	5.37337e-08	-0.359642	0.359642	0.239101	0.306792	0.216615	0.263998	6.90384e-07	18681940
Aspn	5.39237e-08	-0.909361	0.909361	0.0393036	0.0738206	0.030594	0.0540275	6.923e-07	18930869
Tunar	5.59171e-08	-0.52647	0.52647	0.0589076	0.0848505	0.0721304	0.105845	7.15721e-07	1.88412e+07
Prkra	5.83465e-08	-0.24467	0.24467	0.233498	0.276653	0.2749	0.335462	7.45128e-07	1.86425e+07
Rapgef2	6.08714e-08	-0.235713	0.235713	0.234497	0.276118	0.26619	0.324165	7.75619e-07	1.86488e+07
Nln	6.1953e-08	-0.379371	0.379371	0.102788	0.133704	0.136445	0.179764	7.8703e-07	1.87549e+07
Terf1	6.24534e-08	-0.361129	0.361129	0.135535	0.174086	0.171282	0.21832	7.92793e-07	18720194
Prr5l	6.26678e-08	-0.2409	0.2409	0.216197	0.255487	0.244082	0.301081	7.94324e-07	1.86628e+07
Pphln1	6.29202e-08	-0.328451	0.328451	0.148301	0.186217	0.197186	0.24558	7.96927e-07	1.86985e+07
Rcan3	6.31563e-08	-0.412318	0.412318	0.101017	0.134435	0.135998	0.178536	7.99319e-07	1.8756e+07
4930481A15Rik	6.38238e-08	-0.952638	0.952638	0.0189609	0.0366971	0.023448	0.0444499	8.06562e-07	18953673
Ccn2	6.44324e-08	-0.362584	0.362584	0.17434	0.224154	0.150737	0.195727	8.13039e-07	18740345
Alg14	6.4608e-08	-0.324798	0.324798	0.14351	0.179744	0.190487	0.23944	8.14648e-07	1.87039e+07
Hist1h2be	6.5973e-08	-0.663925	0.663925	0.0423435	0.0670885	0.0553819	0.0849705	8.30005e-07	1.88743e+07
Phtf1	6.71992e-08	-0.273453	0.273453	0.145699	0.176106	0.186244	0.236984	8.44804e-07	18707206
Jazf1	6.75375e-08	-0.762173	0.762173	0.0250105	0.0424188	0.034837	0.0594303	8.47799e-07	18921095
Tjp2	6.75161e-08	-0.383109	0.383109	0.106132	0.138411	0.124386	0.16724	8.47799e-07	18769150
Ahsa1	6.7731e-08	-0.235804	0.235804	0.198287	0.233495	0.238723	0.29666	8.49598e-07	1.86671e+07
Erich1	7.37736e-08	-0.346365	0.346365	0.105586	0.134237	0.138901	0.183448	9.213e-07	1.87541e+07
Itga10	7.40199e-08	-0.603217	0.603217	0.0497681	0.0756028	0.057615	0.0879175	9.23695e-07	1.88707e+07
Zbtb33	7.51516e-08	-0.323673	0.323673	0.114684	0.143528	0.147387	0.19278	9.36436e-07	1.87455e+07
Sh3bp5	7.55138e-08	-0.229241	0.229241	0.196131	0.229909	0.224654	0.281189	9.40258e-07	18678541
Zfp397	8.01071e-08	-0.208691	0.208691	0.269504	0.31145	0.305494	0.367633	9.93071e-07	18631645
Lcn2	8.50762e-08	-2.10773	2.10773	0.00242242	0.010441	0.0031264	0.0135069	1.05159e-06	19051075
R3hcc1l	8.59503e-08	-0.307335	0.307335	0.0949969	0.117551	0.125279	0.167976	1.06085e-06	18771290
Fam3c	8.70244e-08	-0.228744	0.228744	0.222206	0.260384	0.259044	0.317289	1.07332e-06	18658707
Hagh	8.72201e-08	-0.287097	0.287097	0.158347	0.193212	0.201653	0.253193	1.07495e-06	18698804
Ccdc28b	8.98096e-08	-0.244866	0.244866	0.184896	0.219099	0.224654	0.281189	1.10446e-06	18681261
Asap2	9.01238e-08	-0.324573	0.324573	0.146558	0.183534	0.182001	0.230108	1.10752e-06	1.8716e+07
Mrpl39	9.19169e-08	-0.257864	0.257864	0.16389	0.195964	0.209469	0.263261	1.12747e-06	1.86931e+07
Sike1	9.59299e-08	-0.206374	0.206374	0.23191	0.267574	0.276016	0.337672	1.17206e-06	18649896
Ptgr2	9.65365e-08	-0.394583	0.394583	0.0994424	0.130723	0.136445	0.178782	1.17777e-06	18761165
Gm20721	9.66752e-08	-0.5503	0.5503	0.0425165	0.0622608	0.0511389	0.0800589	1.17862e-06	18886091
Acyp2	1.00134e-07	-0.219658	0.219658	0.237496	0.276554	0.263734	0.324411	1.21903e-06	1.86577e+07
Ckap5	1.00925e-07	-0.200228	0.200228	0.35712	0.410288	0.375391	0.440079	1.2269e-06	18605963
Anxa11	1.02419e-07	-0.364421	0.364421	0.118834	0.152982	0.159	0.203585	1.24267e-06	1.87391e+07
Morc3	1.06765e-07	-0.266591	0.266591	0.197184	0.237205	0.239169	0.292731	1.2914e-06	1.86755e+07
Fbxl6	1.08562e-07	-0.235486	0.235486	0.19068	0.224488	0.234703	0.289293	1.3122e-06	18678276
Stambp	1.10493e-07	-0.229485	0.229485	0.232138	0.272162	0.270657	0.330305	1.33459e-06	1.86557e+07
Tubb6	1.11527e-07	-0.258151	0.258151	0.256386	0.306624	0.280482	0.337181	1.34612e-06	1.86513e+07
Ncoa3	1.11832e-07	-0.295853	0.295853	0.158854	0.195011	0.19674	0.247053	1.34787e-06	18706699
Zfand3	1.11827e-07	-0.20522	0.20522	0.287159	0.331055	0.326708	0.392436	1.34787e-06	18626978
Asna1	1.12322e-07	-0.218802	0.218802	0.218606	0.254407	0.26418	0.325147	1.35185e-06	1.86593e+07
Homer2	1.13326e-07	-0.416124	0.416124	0.0957675	0.127786	0.121706	0.161591	1.36297e-06	1.87802e+07
Pxdn	1.14689e-07	-0.224396	0.224396	0.276702	0.323267	0.306387	0.367141	1.37741e-06	18637771
Gosr1	1.15095e-07	-0.315319	0.315319	0.121405	0.151062	0.162126	0.208743	1.3813e-06	18737050
Ndfip2	1.16735e-07	-0.207394	0.207394	0.301938	0.348618	0.344127	0.4111	1.39999e-06	18620175
Rad50	1.17566e-07	-0.212888	0.212888	0.265955	0.308243	0.294774	0.353635	1.40896e-06	1.86443e+07
Cstdc5	1.19329e-07	-1.27528	1.27528	0.00731863	0.0177144	0.00714605	0.0203831	1.42807e-06	19025271
1110008P14Rik	1.19524e-07	-0.235211	0.235211	0.187336	0.220509	0.22979	0.286591	1.4294e-06	18682314
Sept10	1.19813e-07	-0.274669	0.274669	0.166755	0.201726	0.203886	0.254912	1.43184e-06	1.87022e+07
Adamts3	1.206e-07	-0.300499	0.300499	0.145184	0.178804	0.167039	0.215619	1.44023e-06	18732571
Bivm	1.24176e-07	-0.461634	0.461634	0.0779099	0.10729	0.105181	0.142682	1.48188e-06	18801803
1810030O07Rik	1.26209e-07	-0.227561	0.227561	0.184666	0.216217	0.224431	0.279715	1.50402e-06	1.86872e+07
C1s2	1.30143e-07	-0.924792	0.924792	0.0143275	0.0271994	0.0236713	0.0442043	1.54765e-06	18958257
Lactb	1.34416e-07	-0.290199	0.290199	0.147973	0.180942	0.18669	0.236002	1.59509e-06	18717607
Nufip1	1.36639e-07	-0.298539	0.298539	0.122509	0.150674	0.163689	0.209971	1.6192e-06	18738231
Stx7	1.38693e-07	-0.235081	0.235081	0.224248	0.263933	0.26753	0.324902	1.6424e-06	1.86619e+07
Psmd10	1.42311e-07	-0.262998	0.262998	0.186887	0.224259	0.240063	0.294941	1.68406e-06	18679172
Ppp2cb	1.47288e-07	-0.239598	0.239598	0.23338	0.275543	0.270657	0.326621	1.74053e-06	1.86615e+07
Gmps	1.47666e-07	-0.2092	0.2092	0.345743	0.399695	0.378964	0.443026	1.74378e-06	1.86119e+07
Camta1	1.48221e-07	-0.213387	0.213387	0.28567	0.331208	0.320232	0.379912	1.74912e-06	18636140
Golph3l	1.54214e-07	-0.281678	0.281678	0.150068	0.182424	0.19138	0.240914	1.81477e-06	18715929
Hectd2os	1.56221e-07	-0.692959	0.692959	0.0243065	0.0392938	0.0272443	0.0491159	1.83584e-06	1.89485e+07
Eid2b	1.60326e-07	-0.377188	0.377188	0.100094	0.130003	0.135998	0.1778	1.88147e-06	18768567
Idh1	1.66693e-07	-0.256813	0.256813	0.197511	0.235993	0.236936	0.291749	1.95345e-06	1.86837e+07
0610010F05Rik	1.67716e-07	-0.475117	0.475117	0.0511965	0.0711647	0.0703439	0.102407	1.96005e-06	1.88563e+07
Purg	1.67895e-07	-0.313925	0.313925	0.102144	0.126974	0.129745	0.172397	1.96079e-06	1.87752e+07
Sept2	1.72046e-07	-0.282647	0.282647	0.133827	0.162791	0.168602	0.215128	2.00512e-06	1.87372e+07
Tfrc	1.74162e-07	-0.275484	0.275484	0.164886	0.199578	0.180884	0.228143	2.02838e-06	18726870
Shisa4	1.79344e-07	-0.234162	0.234162	0.268331	0.315617	0.26753	0.325639	2.08586e-06	18666041
Pdk4	1.7953e-07	-0.2973	0.2973	0.14231	0.174877	0.147387	0.192043	2.08658e-06	1.87576e+07
Shtn1	1.80114e-07	-0.372149	0.372149	0.128935	0.166877	0.145824	0.188605	2.09194e-06	1.876e+07
Ptrhd1	1.81412e-07	-0.25445	0.25445	0.212849	0.253904	0.264404	0.320727	2.10413e-06	1.86684e+07
Nudcd1	1.81829e-07	-0.392537	0.392537	0.0952107	0.124983	0.137561	0.178291	2.10753e-06	18769185
Zc3h7a	1.8553e-07	-0.213591	0.213591	0.265837	0.308256	0.300804	0.36002	2.14895e-06	1.86492e+07
Inpp5f	1.97072e-07	-0.341898	0.341898	0.134185	0.170069	0.174185	0.219057	2.27797e-06	18735108
Stk4	1.99717e-07	-0.296201	0.296201	0.116558	0.143122	0.15431	0.199656	2.30696e-06	18752388
Tmem141	2.05337e-07	-0.286714	0.286714	0.13659	0.16662	0.169719	0.217092	2.36703e-06	1.87384e+07
Anxa4	2.10424e-07	-0.225089	0.225089	0.199064	0.232675	0.240286	0.296169	2.42073e-06	18685156
Mrpl9	2.14705e-07	-0.23151	0.23151	0.237286	0.278589	0.288745	0.346267	2.46663e-06	18658137
Zbtb41	2.25385e-07	-0.253986	0.253986	0.171237	0.204199	0.213265	0.26498	2.57709e-06	1.87051e+07
Ubr1	2.26253e-07	-0.209509	0.209509	0.225917	0.261227	0.26351	0.323919	2.58527e-06	18671615
Gm7324	2.27771e-07	-0.61749	0.61749	0.0324837	0.0498366	0.0460027	0.072446	2.5991e-06	1.89056e+07
Nfia	2.4162e-07	-0.329324	0.329324	0.173116	0.217507	0.156096	0.200639	2.75343e-06	1.87538e+07
Nucb2	2.42138e-07	-0.221174	0.221174	0.196814	0.229422	0.23649	0.290521	2.75747e-06	18690360
Afap1	2.43971e-07	-0.295474	0.295474	0.18126	0.222458	0.205449	0.254666	2.77649e-06	1.87127e+07
Slco3a1	2.57889e-07	-0.305825	0.305825	0.157478	0.194662	0.187807	0.235265	2.9329e-06	1.87272e+07
Utp14b	2.5955e-07	-0.381541	0.381541	0.0692031	0.0901531	0.0931219	0.128929	2.94982e-06	18826558
Lars	2.65464e-07	-0.203059	0.203059	0.34103	0.392573	0.375614	0.441061	3.01299e-06	1.86239e+07
Flot1	2.66867e-07	-0.213559	0.213559	0.265424	0.307771	0.299687	0.36002	3.02688e-06	1.8656e+07
Mturn	2.67232e-07	-0.442276	0.442276	0.0626874	0.0851762	0.0790531	0.11223	3.02899e-06	1.88475e+07
Fbxl18	2.69382e-07	-0.366604	0.366604	0.0670076	0.0863938	0.0879857	0.123035	3.04927e-06	18834157
Cacna2d3	2.72222e-07	-0.256874	0.256874	0.165618	0.197895	0.183787	0.233055	3.07525e-06	18730508
Mindy2	2.73229e-07	-0.204267	0.204267	0.274111	0.315803	0.292988	0.35167	3.08457e-06	18660009
Slc35d1	2.79253e-07	-0.273966	0.273966	0.18334	0.221682	0.206342	0.255403	3.14629e-06	1.87142e+07
5730507C01Rik	2.81863e-07	-0.922404	0.922404	0.0144503	0.0273873	0.0200983	0.0388016	3.17358e-06	18975514
Tmem51	2.83443e-07	-0.298724	0.298724	0.132238	0.16266	0.162796	0.20776	3.18713e-06	18750023
Parg	2.85918e-07	-0.259261	0.259261	0.191942	0.229729	0.239169	0.291503	3.21283e-06	1.8692e+07
D630033O11Rik	2.90167e-07	-0.387701	0.387701	0.118902	0.15556	0.127066	0.166994	3.25842e-06	18786497
Hebp1	2.96545e-07	-0.248704	0.248704	0.16242	0.192978	0.199419	0.25	3.32563e-06	18719605
Mvk	2.97275e-07	-0.268313	0.268313	0.132498	0.159581	0.171282	0.21832	3.3294e-06	1.87427e+07
Smndc1	2.99753e-07	-0.202689	0.202689	0.300294	0.345591	0.339214	0.402505	3.35272e-06	1.86402e+07
Plekha1	3.00663e-07	-0.243866	0.243866	0.181296	0.214684	0.218178	0.269401	3.3603e-06	18706557
Rab4a	3.41821e-07	-0.245339	0.245339	0.169825	0.201305	0.210138	0.261297	3.79567e-06	1.87141e+07
Sphk1	3.42655e-07	-0.240574	0.240574	0.183605	0.216923	0.179991	0.229126	3.80244e-06	1.8737e+07
Fam220a	3.49707e-07	-1.25123	1.25123	0.0102208	0.0243301	0.0178651	0.0353635	3.87781e-06	1.8985e+07
Elk4	3.59167e-07	-0.218856	0.218856	0.222992	0.259521	0.267084	0.323674	3.97265e-06	1.86786e+07
Nt5m	3.65755e-07	-0.240414	0.240414	0.171568	0.202679	0.216168	0.267436	4.04024e-06	1.87111e+07
Gpr89	3.87953e-07	-0.241604	0.241604	0.160383	0.189622	0.195176	0.244843	4.25768e-06	1.87272e+07
Rnaseh2b	3.94017e-07	-0.308362	0.308362	0.133028	0.164729	0.175748	0.221022	4.32143e-06	18743972
Brix1	4.11536e-07	-0.204324	0.204324	0.287974	0.331789	0.332068	0.393664	4.50191e-06	1.86493e+07
Agtpbp1	4.13481e-07	-0.274644	0.274644	0.135704	0.164161	0.169049	0.214637	4.51735e-06	18750035
Edn3	4.14488e-07	-0.250667	0.250667	0.154737	0.184099	0.163689	0.210953	4.52251e-06	18753882
Thumpd1	4.16323e-07	-0.244178	0.244178	0.19127	0.226544	0.239616	0.292731	4.53961e-06	1.86978e+07
Zfp738	4.43139e-07	-0.258915	0.258915	0.119549	0.143049	0.144931	0.188605	4.8165e-06	18772961
Insig1	4.4462e-07	-0.382262	0.382262	0.0917155	0.11954	0.118133	0.156189	4.82641e-06	18802499
Itga8	4.57336e-07	-0.363818	0.363818	0.108827	0.140041	0.118133	0.157417	4.95491e-06	1.88022e+07
Wdr47	4.58773e-07	-0.364494	0.364494	0.101145	0.130217	0.131085	0.170923	4.9673e-06	1.87886e+07
Dnajc24	4.73707e-07	-0.232818	0.232818	0.175892	0.206696	0.221751	0.274558	5.11591e-06	18711142
Plce1	4.812e-07	-0.210524	0.210524	0.271477	0.314129	0.258821	0.315815	5.18691e-06	18688116
Rassf8	4.81626e-07	-0.211786	0.211786	0.246868	0.285903	0.280706	0.337917	5.18821e-06	18676548
Nanp	4.96997e-07	-0.25177	0.25177	0.132399	0.157643	0.169495	0.215373	5.33343e-06	1.87523e+07
1700096K18Rik	5.05965e-07	-0.503102	0.503102	0.0474202	0.0672066	0.0658776	0.095776	5.42623e-06	1.88761e+07
Cyb561d2	5.13112e-07	-0.283386	0.283386	0.15511	0.188776	0.19607	0.242141	5.49939e-06	1.87322e+07
Baiap2l1	5.21264e-07	-0.423492	0.423492	0.0725635	0.09732	0.0859759	0.119597	5.56563e-06	18845264
Clip4	5.25832e-07	-0.573917	0.573917	0.0453249	0.0674688	0.0647611	0.0938114	5.60733e-06	18878850
Cryzl2	5.29071e-07	-0.478004	0.478004	0.0526831	0.0733778	0.0750335	0.106336	5.63832e-06	18861967
Elovl5	5.30691e-07	-0.244332	0.244332	0.218115	0.258366	0.247209	0.299607	5.65203e-06	1.86976e+07
Zfp386	5.3832e-07	-0.211712	0.211712	0.201562	0.233421	0.239393	0.294204	5.72967e-06	1.87018e+07
Tdg	5.55448e-07	-0.241201	0.241201	0.194366	0.229736	0.240509	0.292731	5.89345e-06	18702366
Brinp1	5.64054e-07	-0.348421	0.348421	0.126311	0.160815	0.122823	0.161591	5.97354e-06	1.88003e+07
Gtf2h3	5.74285e-07	-0.326599	0.326599	0.119166	0.14944	0.161456	0.203831	6.07809e-06	18762564
Zfp955b	5.78834e-07	-0.223001	0.223001	0.165908	0.19364	0.202769	0.252701	6.1224e-06	1.87281e+07
Asl	6.19917e-07	-0.423907	0.423907	0.0659889	0.0885278	0.0893256	0.123035	6.49609e-06	18842874
Neurl2	6.32375e-07	-0.503734	0.503734	0.0384343	0.0544952	0.0531487	0.0803045	6.61027e-06	18901188
Arf2	6.40397e-07	-0.234087	0.234087	0.193566	0.227665	0.236713	0.289047	6.68999e-06	1.8707e+07
Lamc3	6.64333e-07	-0.315625	0.315625	0.082028	0.102088	0.0911121	0.125737	6.90173e-06	18840871
Nutf2	6.65542e-07	-0.803241	0.803241	0.0222348	0.0388	0.0337204	0.0557466	6.91005e-06	18943864
Pi4k2a	6.7505e-07	-0.247133	0.247133	0.166606	0.197736	0.208129	0.256876	7.00018e-06	1.87273e+07
Hist1h3e	7.15451e-07	-0.648042	0.648042	0.0523134	0.0819772	0.0692273	0.0982318	7.39649e-06	18875281
Ano6	7.21023e-07	-0.231658	0.231658	0.212449	0.249454	0.253238	0.304764	7.445e-06	1.86997e+07
Atrnl1	7.38438e-07	-0.256626	0.256626	0.0968803	0.115741	0.125726	0.165275	7.61553e-06	1.88005e+07
Gm16565	7.4349e-07	-0.973004	0.973004	0.0127019	0.0249329	0.0140688	0.0297151	7.66297e-06	1.90039e+07
Specc1	7.86148e-07	-0.342197	0.342197	0.152974	0.193923	0.178874	0.221267	8.0585e-06	18753142
Uchl5	7.87229e-07	-0.224959	0.224959	0.168756	0.197233	0.211702	0.261788	8.06469e-06	1.8727e+07
Pus10	8.04008e-07	-0.339491	0.339491	0.0715112	0.0904839	0.0964716	0.131631	8.21225e-06	1.88363e+07
Adam17	8.04057e-07	-0.212165	0.212165	0.255885	0.296423	0.292541	0.347986	8.21225e-06	18680469
Fez1	8.10922e-07	-0.280076	0.280076	0.14046	0.170555	0.160339	0.204568	8.27737e-06	18767891
Rbm41	8.1692e-07	-0.433655	0.433655	0.0556646	0.0751835	0.0750335	0.10609	8.33357e-06	1.88669e+07
Spats2	8.18857e-07	-0.21337	0.21337	0.206821	0.239786	0.248102	0.301817	8.3483e-06	18704250
Adamtsl1	8.39961e-07	-0.305657	0.305657	0.132834	0.164181	0.140464	0.181729	8.54801e-06	18787236
Polr3k	8.40705e-07	-0.204705	0.204705	0.283339	0.326535	0.333408	0.391454	8.55045e-06	18662969
March2	8.45105e-07	-0.239517	0.239517	0.189445	0.223658	0.229343	0.280943	8.59004e-06	18716442
Ifi30	8.54379e-07	-0.222809	0.222809	0.209189	0.244124	0.243859	0.295432	8.6791e-06	1.8708e+07
Syap1	8.5725e-07	-0.208764	0.208764	0.208874	0.241395	0.252345	0.305747	8.70304e-06	18702757
Slc35a1	8.70375e-07	-0.209077	0.209077	0.242857	0.280731	0.285842	0.342338	8.82043e-06	1.86849e+07
Ctdspl	8.76321e-07	-0.208161	0.208161	0.179856	0.207773	0.215498	0.266208	8.87007e-06	18726057
Commd9	8.77921e-07	-0.2057	0.2057	0.21709	0.250358	0.262394	0.319008	8.88095e-06	18696892
Slc9a3r2	8.86e-07	-0.35119	0.35119	0.101838	0.129906	0.126842	0.165766	8.95578e-06	1.88022e+07
Mycbp	9.06895e-07	-0.247578	0.247578	0.168353	0.19987	0.210138	0.258595	9.13584e-06	1.87309e+07
Hist2h2ac	9.08316e-07	-0.655757	0.655757	0.0395985	0.0623852	0.0515855	0.0776031	9.14473e-06	1.89083e+07
Slc37a3	9.22635e-07	-0.221652	0.221652	0.248418	0.289672	0.281376	0.333743	9.27785e-06	18689102
Ankrd24	9.48437e-07	-0.275179	0.275179	0.141434	0.171155	0.172398	0.216356	9.526e-06	18760538
Apmap	9.53797e-07	-0.436616	0.436616	0.0785087	0.106256	0.11188	0.147102	9.56848e-06	18820689
2810006K23Rik	9.54492e-07	-0.285223	0.285223	0.104255	0.127046	0.139348	0.18001	9.56979e-06	18790363
Timp1	9.64324e-07	-0.320076	0.320076	0.172487	0.215333	0.170835	0.213163	9.66264e-06	18762654
Mapk9	9.75505e-07	-0.24618	0.24618	0.165579	0.196387	0.207235	0.255403	9.76313e-06	18734101
Ntpcr	9.85093e-07	-0.268912	0.268912	0.147419	0.177625	0.188254	0.233792	9.85326e-06	18748478
Cacna2d1	9.87939e-07	-0.24167	0.24167	0.215276	0.254533	0.244305	0.296415	9.87589e-06	1.87101e+07
Bmp3	9.9092e-07	-0.408563	0.408563	0.109048	0.144747	0.0741402	0.104862	9.89984e-06	18870510
Ccdc66	1.02094e-06	-0.241762	0.241762	0.147378	0.174265	0.184904	0.231336	1.01757e-05	18751205
Akap7	1.05463e-06	-0.248724	0.248724	0.15635	0.185768	0.179768	0.225196	1.05053e-05	1.87559e+07
Ethe1	1.07795e-06	-0.212551	0.212551	0.208008	0.241026	0.244305	0.298379	1.07313e-05	1.87111e+07
Fabp7	1.10097e-06	-0.542912	0.542912	0.0559749	0.0815504	0.0460027	0.0709725	1.09476e-05	18920877
Zmym1	1.10922e-06	-0.291572	0.291572	0.0789058	0.0965786	0.103618	0.139489	1.10103e-05	1.88315e+07
Slx4ip	1.13939e-06	-0.408632	0.408632	0.0827503	0.109845	0.10987	0.144892	1.12776e-05	1.88253e+07
Synm	1.16068e-06	-0.441875	0.441875	0.0771304	0.104772	0.0895489	0.122053	1.1454e-05	1.88508e+07
Plin3	1.1653e-06	-0.20523	0.20523	0.259545	0.299221	0.294328	0.349951	1.14928e-05	18686476
Necap2	1.18815e-06	-0.203598	0.203598	0.214058	0.246503	0.259268	0.312132	1.17114e-05	18704930
Nol3	1.1929e-06	-0.313078	0.313078	0.0918729	0.114139	0.11925	0.157171	1.17514e-05	18814458
Plxna2	1.24761e-06	-0.319772	0.319772	0.147762	0.184427	0.15833	0.199656	1.22257e-05	18777212
Samd4	1.26349e-06	-0.303396	0.303396	0.111732	0.137883	0.137338	0.176817	1.23605e-05	18796766
Zfp40	1.26981e-06	-0.386843	0.386843	0.0534798	0.0699264	0.0719071	0.102161	1.24151e-05	1.88767e+07
Gm42726	1.3292e-06	-0.543364	0.543364	0.0360557	0.0525464	0.0410898	0.064833	1.29509e-05	18932860
Hmbox1	1.34739e-06	-0.248464	0.248464	0.180404	0.214309	0.222644	0.270629	1.31056e-05	18729617
Ifngr2	1.45011e-06	-0.260722	0.260722	0.177015	0.212078	0.221974	0.26891	1.40321e-05	1.87316e+07
Arfgap3	1.49938e-06	-0.269183	0.269183	0.147682	0.177976	0.192273	0.237475	1.4484e-05	1.87525e+07
Adpgk	1.505e-06	-0.250482	0.250482	0.117476	0.13975	0.157883	0.199902	1.45134e-05	1.87801e+07
Zc2hc1a	1.52131e-06	-0.364784	0.364784	0.0904037	0.116412	0.123046	0.159627	1.46458e-05	1.88146e+07
Flvcr2	1.5552e-06	-0.482783	0.482783	0.0375627	0.0524915	0.0453327	0.0699902	1.4955e-05	18925526
Scrn1	1.56374e-06	-0.213838	0.213838	0.355138	0.411879	0.336311	0.390472	1.50201e-05	18674590
Micu3	1.57752e-06	-0.275034	0.275034	0.153107	0.185263	0.186021	0.230354	1.51438e-05	1.87581e+07
Ppil1	1.59921e-06	-0.229324	0.229324	0.182988	0.214514	0.230683	0.279961	1.5326e-05	18727305
Zfp469	1.62172e-06	-0.423218	0.423218	0.0654806	0.0878039	0.0911121	0.123527	1.55241e-05	1.88529e+07
St3gal5	1.62937e-06	-0.229099	0.229099	0.21375	0.250537	0.237606	0.286346	1.55885e-05	1.87237e+07
Col4a1	1.67633e-06	-0.292405	0.292405	0.407665	0.499259	0.290085	0.335707	1.60107e-05	1.86975e+07
Hmgcs1	1.69862e-06	-0.250295	0.250295	0.201658	0.239863	0.233586	0.281189	1.62053e-05	18727112
Smap2	1.72002e-06	-0.209744	0.209744	0.190636	0.220467	0.23515	0.286346	1.64003e-05	1.87254e+07
Ints8	1.80086e-06	-0.216119	0.216119	0.128384	0.149132	0.164582	0.208743	1.70845e-05	1.87766e+07
Lyst	1.83679e-06	-0.259626	0.259626	0.13521	0.16187	0.168602	0.210953	1.74058e-05	18774415
Spg7	1.8404e-06	-0.213443	0.213443	0.19481	0.225873	0.238723	0.288556	1.74303e-05	1.87249e+07
3110040N11Rik	1.86444e-06	-0.244703	0.244703	0.117367	0.139062	0.15498	0.1972	1.76382e-05	18785750
Dclre1a	1.88904e-06	-0.264073	0.264073	0.107926	0.129604	0.136668	0.176081	1.7851e-05	18803206
Syn2	1.9172e-06	-0.684024	0.684024	0.0248165	0.0398706	0.0267977	0.046169	1.81004e-05	1.89704e+07
Gm26782	1.91757e-06	-0.235201	0.235201	0.113057	0.133076	0.138231	0.179028	1.81004e-05	18801388
Podnl1	1.93593e-06	-0.314927	0.314927	0.0757482	0.0942269	0.0817329	0.113212	1.82534e-05	18867423
C1galt1	1.96583e-06	-0.278262	0.278262	0.188831	0.229002	0.223537	0.267927	1.85249e-05	1.87366e+07
Panx3	2.0392e-06	-0.310791	0.310791	0.144444	0.179167	0.139125	0.178291	1.91525e-05	18802180
Nav1	2.08856e-06	-0.227186	0.227186	0.153225	0.179358	0.180661	0.224951	1.95835e-05	18766575
Gm10762	2.12897e-06	-0.226055	0.226055	0.164237	0.192096	0.202992	0.249018	1.99513e-05	18750659
Slc40a1	2.18589e-06	-0.24388	0.24388	0.148489	0.175836	0.15699	0.199165	2.04508e-05	1.87865e+07
Emc9	2.22257e-06	-0.311928	0.311928	0.0981924	0.121893	0.120143	0.156925	2.07511e-05	1.88226e+07
Gprc5c	2.24605e-06	-0.288112	0.288112	0.111827	0.136545	0.139125	0.178782	2.09441e-05	1.88034e+07
Dnpep	2.26763e-06	-0.200219	0.200219	0.278896	0.320416	0.320902	0.375	2.11105e-05	1.8688e+07
Isg20l2	2.33776e-06	-0.231045	0.231045	0.146827	0.172328	0.19071	0.235511	2.17276e-05	18761018
Farsb	2.43168e-06	-0.225882	0.225882	0.166955	0.195252	0.210808	0.257859	2.25633e-05	1.87475e+07
Zmym6	2.43364e-06	-0.334938	0.334938	0.0749092	0.0944847	0.0920054	0.124754	2.25692e-05	1.88567e+07
Dcaf6	2.45168e-06	-0.234979	0.234979	0.143242	0.168581	0.176641	0.22053	2.27116e-05	18772289
Fat3	2.51353e-06	-0.384437	0.384437	0.0766107	0.100004	0.0812863	0.111739	2.32336e-05	1.88717e+07
Chfr	2.51787e-06	-0.232203	0.232203	0.140958	0.165573	0.176418	0.22053	2.32611e-05	1.87728e+07
Adamtsl4	2.52433e-06	-0.49823	0.49823	0.0310329	0.0438333	0.0381867	0.0604126	2.33081e-05	1.89455e+07
Spata6	2.54948e-06	-0.208095	0.208095	0.16458	0.190116	0.202769	0.250737	2.35012e-05	1.87532e+07
Smco4	2.58334e-06	-0.21693	0.21693	0.22018	0.255906	0.260607	0.312377	2.37365e-05	18718677
Plpp5	2.59394e-06	-0.205809	0.205809	0.18559	0.214047	0.226664	0.275786	2.38081e-05	18738247
Pcbd1	2.69674e-06	-0.206572	0.206572	0.23244	0.268222	0.240956	0.291503	2.4658e-05	1.87303e+07
Ehd2	2.7267e-06	-0.298709	0.298709	0.124485	0.153122	0.148504	0.187868	2.49185e-05	18798157
Shox2	2.84291e-06	-0.664326	0.664326	0.0440967	0.0698856	0.0477892	0.0714637	2.58688e-05	18927640
Gm10561	2.87311e-06	-0.356562	0.356562	0.0618327	0.0791689	0.0777133	0.108055	2.60876e-05	1.8878e+07
Mterf1a	2.89295e-06	-0.286153	0.286153	0.0833604	0.101648	0.104511	0.139489	2.62255e-05	18843439
Amotl2	2.90804e-06	-0.23717	0.23717	0.172499	0.203321	0.200536	0.246316	2.63341e-05	1.87577e+07
Tmem183a	2.9226e-06	-0.270944	0.270944	0.137902	0.166392	0.182671	0.225196	2.64518e-05	1.87712e+07
Kyat3	3.00808e-06	-0.539525	0.539525	0.0349889	0.0508561	0.0433229	0.0665521	2.71673e-05	1.89365e+07
Mmp11	3.06307e-06	-0.26916	0.26916	0.103797	0.125086	0.125056	0.162574	2.76451e-05	1.88219e+07
C1rb	3.10656e-06	-0.608091	0.608091	0.0326867	0.0498225	0.0468959	0.0704813	2.79673e-05	1.89301e+07
Trub1	3.18151e-06	-0.236285	0.236285	0.126821	0.14939	0.160339	0.202358	2.85965e-05	1.87897e+07
Cars2	3.36027e-06	-0.251769	0.251769	0.126198	0.15026	0.161903	0.203094	3.00755e-05	1.87896e+07
Amer1	3.36746e-06	-0.257988	0.257988	0.102872	0.123015	0.132425	0.170187	3.01239e-05	18816260
A730049H05Rik	3.39193e-06	-0.949977	0.949977	0.0099871	0.0192935	0.0158553	0.030943	3.03268e-05	1.90081e+07
Eci3	3.42898e-06	-1.30998	1.30998	0.00415939	0.0103127	0.00535954	0.0154715	3.06419e-05	19053683
Pde4dip	3.4547e-06	-0.253516	0.253516	0.181503	0.216372	0.220411	0.266945	3.08392e-05	18747811
Mtmr6	3.52005e-06	-0.20818	0.20818	0.151131	0.174591	0.19138	0.236248	3.13399e-05	1.87674e+07
Samhd1	3.53227e-06	-0.21559	0.21559	0.256871	0.298273	0.276909	0.327603	3.14322e-05	1.87167e+07
Mcm6	3.5664e-06	-0.23836	0.23836	0.138215	0.163045	0.15833	0.200393	3.17192e-05	18793101
Trmt10b	3.64695e-06	-0.369857	0.369857	0.0754782	0.0975348	0.0982582	0.130894	3.23676e-05	1.88546e+07
Svep1	3.69945e-06	-0.386468	0.386468	0.113428	0.148272	0.119696	0.153487	3.2782e-05	1.88316e+07
Aph1b	3.79195e-06	-0.221671	0.221671	0.138533	0.161541	0.168825	0.212426	3.3514e-05	1.87853e+07
Pwwp3b	3.81017e-06	-0.463027	0.463027	0.0428446	0.0590583	0.0578383	0.0834971	3.36575e-05	18912587
P4ha3	3.85231e-06	-0.644098	0.644098	0.036623	0.057233	0.0567218	0.081778	3.4012e-05	18914882
Gm47003	3.97484e-06	-1.32539	1.32539	0.00491707	0.0123222	0.00602948	0.0164538	3.50208e-05	1.90507e+07
Rad17	3.98537e-06	-0.224847	0.224847	0.179261	0.209493	0.22778	0.274558	3.50953e-05	1.87459e+07
Mfsd12	4.00473e-06	-0.464608	0.464608	0.0360294	0.0497185	0.0509156	0.0753929	3.52474e-05	18925042
Smad2	4.11023e-06	-0.20888	0.20888	0.19493	0.225298	0.240956	0.290275	3.60076e-05	18738334
Pxdc1	4.11591e-06	-0.38327	0.38327	0.085485	0.111498	0.112104	0.145629	3.602e-05	1.88409e+07
Thbs2	4.13101e-06	-0.33618	0.33618	0.229748	0.290037	0.173292	0.212917	3.61149e-05	1.87848e+07
Hmgcr	4.13557e-06	-0.201019	0.201019	0.194493	0.223571	0.234033	0.281434	3.61361e-05	1.87428e+07
Slc4a1	4.15474e-06	-1.47418	1.47418	0.00598516	0.0166283	0.00714605	0.0181729	3.62849e-05	19045115
Ccdc77	4.19419e-06	-0.32841	0.32841	0.0853073	0.107114	0.110987	0.145138	3.65728e-05	1.8842e+07
Alcam	4.20892e-06	-0.692807	0.692807	0.0502541	0.081232	0.0623046	0.0876719	3.66824e-05	18907100
Slc7a2	4.2572e-06	-0.247617	0.247617	0.178191	0.211556	0.19406	0.23723	3.7065e-05	1.87693e+07
Gpc1	4.3498e-06	-0.327587	0.327587	0.119748	0.150273	0.145154	0.181974	3.77741e-05	1.88092e+07
Myl6b	4.39066e-06	-0.638234	0.638234	0.0180286	0.0280601	0.0247879	0.0427308	3.80739e-05	1.89829e+07
St6galnac4	4.44751e-06	-0.246677	0.246677	0.135588	0.160872	0.172845	0.214391	3.84844e-05	1.87856e+07
St8sia2	4.52428e-06	-0.979598	0.979598	0.0130276	0.0256892	0.0167485	0.0319253	3.91088e-05	19007173
Msantd3	4.54594e-06	-0.231896	0.231896	0.143247	0.168226	0.187584	0.230845	3.9256e-05	1.87748e+07
Tradd	4.56176e-06	-0.219269	0.219269	0.156965	0.18273	0.200089	0.245088	3.93541e-05	18765924
Dmxl2	4.57816e-06	-0.253589	0.253589	0.143939	0.171599	0.170612	0.212426	3.94537e-05	18787676
Gm3830	4.7178e-06	-0.38469	0.38469	0.0634558	0.0828466	0.0770433	0.106336	4.05951e-05	18885403
Cep57l1	4.77247e-06	-0.313482	0.313482	0.0834093	0.103653	0.108531	0.142191	4.10447e-05	18846561
Ptx3	4.77626e-06	-0.248983	0.248983	0.128918	0.153203	0.131309	0.16945	4.10564e-05	1.88223e+07
Gm14091	4.83535e-06	-1.30513	1.30513	0.00597805	0.0147721	0.00982582	0.0221022	4.15222e-05	19033572
Fam228b	4.90985e-06	-0.345866	0.345866	0.0680722	0.0865139	0.0835194	0.113949	4.21406e-05	18877020
Sema3a	4.94089e-06	-0.432696	0.432696	0.0685043	0.0924639	0.0830728	0.112967	4.23641e-05	18877964
Kdm1b	5.14868e-06	-0.437233	0.437233	0.0511131	0.0692075	0.0674408	0.0950393	4.4012e-05	18900414
Gpr45	5.16532e-06	-0.271497	0.271497	0.0852204	0.102866	0.104511	0.138998	4.41319e-05	18851461
Map1a	5.18982e-06	-0.354603	0.354603	0.0710761	0.0908803	0.0980348	0.129666	4.43189e-05	18860055
Ptk2	5.22475e-06	-0.22091	0.22091	0.190322	0.221814	0.234703	0.281434	4.45947e-05	18746900
Rnf214	5.52504e-06	-0.20098	0.20098	0.20789	0.238965	0.252568	0.299853	4.69213e-05	1.87382e+07
Ptgr1	5.55133e-06	-0.439318	0.439318	0.056802	0.0770214	0.0835194	0.112721	4.71209e-05	1.88793e+07
Plxnc1	5.60609e-06	-0.4039	0.4039	0.0315973	0.0418057	0.0395266	0.0613949	4.75619e-05	18950324
Emid1	5.61364e-06	-0.368458	0.368458	0.0563619	0.0727616	0.0761501	0.104862	4.76021e-05	18888990
Med17	5.64376e-06	-0.259007	0.259007	0.111122	0.132975	0.146271	0.18443	4.78335e-05	18811692
Mmp13	5.75092e-06	-0.367777	0.367777	0.239399	0.308911	0.105628	0.138016	4.8693e-05	18852797
Abcc9	5.94697e-06	-0.278282	0.278282	0.175301	0.212596	0.171505	0.212181	5.02274e-05	18791711
Gpr153	6.00558e-06	-0.231476	0.231476	0.132203	0.155211	0.157883	0.198674	5.06214e-05	18802217
AI597479	6.09715e-06	-0.244566	0.244566	0.126012	0.149291	0.163912	0.204322	5.12402e-05	1.87979e+07
Arrdc3	6.17038e-06	-0.247322	0.247322	0.0732019	0.0868908	0.0915587	0.123035	5.18042e-05	1.88697e+07
Atp8b1	6.42712e-06	-0.79975	0.79975	0.0221953	0.0386376	0.0334971	0.0530452	5.372e-05	18965315
Egfr	6.51267e-06	-0.532691	0.532691	0.0720452	0.104222	0.0904422	0.119352	5.44082e-05	1.88731e+07
Adcy5	6.61321e-06	-0.583791	0.583791	0.0290414	0.0435267	0.0446628	0.0670432	5.51937e-05	1.89422e+07
Eif2ak4	7.32482e-06	-0.246728	0.246728	0.123007	0.14595	0.15565	0.194253	6.06545e-05	1.8808e+07
Dapp1	7.55677e-06	-0.459213	0.459213	0.0481437	0.0661876	0.0719071	0.0989686	6.24226e-05	18899107
Zfp46	7.72501e-06	-0.34991	0.34991	0.0735913	0.0937908	0.102054	0.133595	6.3688e-05	18861041
Pcdhb15	7.89823e-06	-1.32025	1.32025	0.00734097	0.0183311	0.0116123	0.0243124	6.50212e-05	19029493
2610035D17Rik	7.93011e-06	-0.446813	0.446813	0.0601719	0.0820158	0.072577	0.0999509	6.52203e-05	18898594
Htra3	7.96537e-06	-0.374971	0.374971	0.0987614	0.128075	0.110764	0.142682	6.54467e-05	1.88522e+07
Trim37	8.06424e-06	-0.224888	0.224888	0.138446	0.1618	0.168155	0.208743	6.61627e-05	1.87993e+07
Ntn1	8.17648e-06	-0.602554	0.602554	0.0467825	0.0710346	0.0571684	0.0812868	6.69832e-05	18922811
Cbwd1	8.18006e-06	-0.360556	0.360556	0.0902452	0.115868	0.128406	0.162328	6.69832e-05	18834745
1190005I06Rik	8.38614e-06	-0.294374	0.294374	0.0879381	0.107843	0.112997	0.146857	6.86375e-05	18849791
Fdft1	8.39483e-06	-0.284541	0.284541	0.10821	0.131802	0.140018	0.176572	6.86754e-05	18823789
Smc2	8.42821e-06	-0.212581	0.212581	0.2043	0.236734	0.206342	0.250982	6.89152e-05	1.87729e+07
Zfp646	8.7052e-06	-0.221214	0.221214	0.146746	0.171064	0.183564	0.225442	7.10086e-05	18789146
Tbc1d8b	8.89732e-06	-0.247246	0.247246	0.103817	0.123225	0.141358	0.1778	7.25059e-05	1.88236e+07
Fbxo32	9.06069e-06	-0.269636	0.269636	0.112876	0.136072	0.125056	0.160609	7.37662e-05	1.88386e+07
Hps4	9.0855e-06	-0.207338	0.207338	0.192825	0.222628	0.229567	0.275295	7.39327e-05	1.87603e+07
Npnt	9.19359e-06	-0.337173	0.337173	0.134742	0.170216	0.125279	0.159627	7.46687e-05	1.88392e+07
Adam19	9.37879e-06	-0.35405	0.35405	0.0844181	0.107898	0.11456	0.146857	7.60999e-05	1.88506e+07
Fyb	9.5651e-06	-0.39003	0.39003	0.049106	0.0643495	0.0625279	0.0881631	7.73891e-05	1.89156e+07
Ndufaf7	9.63718e-06	-0.220302	0.220302	0.128688	0.149919	0.167039	0.206778	7.79351e-05	1.88034e+07
Pmm2	9.76877e-06	-0.20906	0.20906	0.15796	0.182591	0.198079	0.24165	7.89239e-05	1.8781e+07
Lig3	9.86308e-06	-0.221476	0.221476	0.149752	0.1746	0.19272	0.234774	7.96098e-05	1.87851e+07
Gm9918	1.03235e-05	-0.433996	0.433996	0.035165	0.0475068	0.0428763	0.064833	8.31282e-05	1.89499e+07
Eya2	1.03344e-05	-0.306512	0.306512	0.0840553	0.103952	0.111657	0.144401	8.31367e-05	18854628
Prr7	1.03316e-05	-0.29278	0.29278	0.107073	0.131164	0.144261	0.180747	8.31367e-05	1.88235e+07
Ipp	1.04896e-05	-0.557876	0.557876	0.0321299	0.0472985	0.0482358	0.0707269	8.43053e-05	18940640
Myo9a	1.0746e-05	-0.204264	0.204264	0.278606	0.320982	0.315989	0.363949	8.61615e-05	1.87226e+07
Rbm48	1.07774e-05	-0.282977	0.282977	0.0891391	0.108456	0.11657	0.150049	8.63722e-05	18850095
Ripk1	1.09635e-05	-0.215031	0.215031	0.145201	0.168539	0.184011	0.224951	8.77808e-05	1.87931e+07
Gm10602	1.1019e-05	-0.559559	0.559559	0.0324912	0.0478861	0.0430996	0.0645874	8.81003e-05	18950564
Hscb	1.10193e-05	-0.209657	0.209657	0.161745	0.187044	0.207905	0.251965	8.81003e-05	1.87769e+07
Msh3	1.143e-05	-0.204718	0.204718	0.161274	0.185862	0.194953	0.237475	9.11275e-05	1.87862e+07
Atpaf2	1.14827e-05	-0.281242	0.281242	0.0811793	0.0986524	0.111657	0.144401	9.15053e-05	1.88561e+07
Fmnl2	1.15406e-05	-0.305935	0.305935	0.108546	0.134187	0.133095	0.167976	9.18797e-05	18835370
Tmem168	1.18519e-05	-0.242795	0.242795	0.146683	0.173567	0.185574	0.226424	9.41367e-05	1.87935e+07
Serp2	1.20078e-05	-0.344683	0.344683	0.0729645	0.0926556	0.0955784	0.125982	9.53303e-05	18874594
Plcl1	1.20383e-05	-0.481074	0.481074	0.0354033	0.0494153	0.0428763	0.0643418	9.55281e-05	18951822
Tsga10	1.20944e-05	-0.340205	0.340205	0.0864277	0.109412	0.107861	0.139489	9.58833e-05	1.88612e+07
Cobll1	1.22977e-05	-0.276743	0.276743	0.119365	0.144606	0.124163	0.159381	9.74497e-05	1.88442e+07
Fxn	1.25198e-05	-0.205658	0.205658	0.135312	0.156043	0.169942	0.210953	9.90703e-05	18805217
Rnf182	1.26921e-05	-0.280705	0.280705	0.0866791	0.105297	0.102054	0.133595	0.000100387	18867871
Orc2	1.27911e-05	-0.206502	0.206502	0.12788	0.147559	0.166592	0.206041	0.000101123	1.88085e+07
Gla	1.28425e-05	-0.533236	0.533236	0.0428506	0.0620122	0.0605181	0.084725	0.000101482	18922762
Zfp976	1.29679e-05	-0.273493	0.273493	0.106972	0.129301	0.125502	0.160118	0.000102377	1.8844e+07
Borcs5	1.31176e-05	-0.283305	0.283305	0.0876287	0.106642	0.11657	0.150295	0.000103462	18852860
Lrrc8c	1.33088e-05	-0.306847	0.306847	0.0875482	0.108297	0.115007	0.147593	0.000104832	1.88551e+07
Atpsckmt	1.33097e-05	-0.224322	0.224322	0.148308	0.173257	0.19071	0.232073	0.000104832	1.8792e+07
St6gal2	1.38271e-05	-0.504726	0.504726	0.0294714	0.0418157	0.0357302	0.055501	0.000108603	18967448
Usp24	1.38632e-05	-0.217292	0.217292	0.135007	0.156952	0.173738	0.212672	0.000108785	18804965
Wnt11	1.38738e-05	-0.432186	0.432186	0.082601	0.111452	0.102501	0.132122	0.000108819	18869598
Pak3	1.43813e-05	-0.558058	0.558058	0.0380448	0.0560128	0.0500223	0.072446	0.000112279	18941046
Efcab7	1.44346e-05	-0.56888	0.56888	0.0255017	0.0378285	0.034837	0.0542731	0.000112643	18969827
Ubac1	1.45014e-05	-0.229589	0.229589	0.201202	0.23591	0.254578	0.299607	0.00011306	18756331
Itga11	1.47394e-05	-0.447744	0.447744	0.0971509	0.132505	0.11724	0.146857	0.00011481	18855800
Zfp52	1.48037e-05	-0.632515	0.632515	0.029652	0.0459684	0.0448861	0.0660609	0.0001151	18950663
Dnaaf4	1.49408e-05	-0.395327	0.395327	0.0433498	0.0570154	0.0596248	0.0842338	0.000116058	18925460
Arhgap26	1.50132e-05	-0.389211	0.389211	0.0787671	0.103159	0.0973649	0.126965	0.000116568	18876118
Prxl2a	1.50295e-05	-0.305974	0.305974	0.094052	0.116272	0.117463	0.150049	0.00011664	1.88545e+07
Arhgap31	1.57108e-05	-0.242626	0.242626	0.122025	0.144373	0.141804	0.178045	0.000121538	18832295
Me2	1.6209e-05	-0.297718	0.297718	0.168673	0.207333	0.181331	0.218811	0.000125049	1.88029e+07
Sema3e	1.63495e-05	-0.282702	0.282702	0.0998189	0.121427	0.102501	0.133841	0.000126019	1.88711e+07
Lyplal1	1.63885e-05	-0.325631	0.325631	0.0672464	0.084274	0.0973649	0.127456	0.000126261	18877074
Heg1	1.64107e-05	-0.302952	0.302952	0.0924964	0.11411	0.123939	0.156925	0.000126318	1.88497e+07
Cntrl	1.6408e-05	-0.263503	0.263503	0.133644	0.160425	0.169495	0.207024	0.000126318	18811348
Dusp12	1.65095e-05	-0.230289	0.230289	0.146935	0.172365	0.189594	0.230845	0.000126847	1.87966e+07
4930579K19Rik	1.68997e-05	-0.34881	0.34881	0.0433953	0.0552644	0.0587316	0.0830059	0.000129552	1.89283e+07
Slc5a3	1.69135e-05	-0.207883	0.207883	0.19837	0.229116	0.209915	0.252947	0.000129598	18783922
Golga5	1.73373e-05	-0.265603	0.265603	0.129273	0.155404	0.174855	0.212181	0.000132367	1.88086e+07
Kcnt2	1.75192e-05	-0.217272	0.217272	0.113661	0.132135	0.116347	0.151031	0.000133695	1.88569e+07
Ibsp	1.75829e-05	-0.664359	0.664359	0.134892	0.213785	0.0752568	0.100688	0.000134001	1.8906e+07
Rnf144a	1.76979e-05	-0.302922	0.302922	0.145347	0.179305	0.173068	0.209971	0.000134816	18810335
Eml1	1.78002e-05	-0.372128	0.372128	0.0496296	0.0642336	0.0701206	0.0960216	0.000135474	18912382
Aoc3	1.79797e-05	-0.946209	0.946209	0.0156496	0.0301537	0.0154087	0.0289784	0.000136717	19021834
Cd276	1.82161e-05	-0.247422	0.247422	0.152435	0.180953	0.19473	0.234037	0.000138452	18795654
Mecr	1.8403e-05	-0.308285	0.308285	0.0927248	0.114815	0.129075	0.162328	0.000139748	1.88468e+07
Zfp273	1.85961e-05	-0.515763	0.515763	0.0215007	0.0307406	0.0261277	0.043222	0.000141087	1.89919e+07
Slit2	1.90409e-05	-0.416384	0.416384	0.075506	0.100769	0.0830728	0.110511	0.00014401	1.88964e+07
Zfp971	1.91848e-05	-0.433918	0.433918	0.0523517	0.0707217	0.07749	0.10388	0.000145004	1.89038e+07
Rragc	1.91894e-05	-0.204458	0.204458	0.209671	0.241594	0.257704	0.303291	0.000145004	18760261
Mcph1	1.92471e-05	-0.399723	0.399723	0.0508538	0.0670891	0.0757034	0.101916	0.000145375	18906095
Grin3a	1.92641e-05	-0.254037	0.254037	0.12678	0.15119	0.124163	0.158644	0.000145438	18851306
Ndufaf1	1.94995e-05	-0.242707	0.242707	0.130856	0.15483	0.170612	0.209479	0.00014715	18813085
Uevld	1.96556e-05	-0.324738	0.324738	0.0716315	0.089714	0.0931219	0.122544	0.000148064	1.88845e+07
Tbc1d1	1.9654e-05	-0.269035	0.269035	0.0978852	0.117952	0.133988	0.168222	0.000148064	18843173
B3galt6	1.97425e-05	-0.258019	0.258019	0.112334	0.134334	0.153193	0.189096	0.00014852	1.88271e+07
Zfp655	1.98936e-05	-0.279101	0.279101	0.121136	0.146991	0.159669	0.195972	0.000149524	18822216
Gosr2	2.00474e-05	-0.203469	0.203469	0.198079	0.228081	0.247655	0.292485	0.00015048	1.87662e+07
Ets1	2.01307e-05	-0.234743	0.234743	0.162101	0.190744	0.177981	0.21832	0.000151038	18808080
Cinp	2.02974e-05	-0.219148	0.219148	0.16965	0.197481	0.219741	0.262279	0.000152154	18781835
Tmem178b	2.032e-05	-1.16414	1.16414	0.00509258	0.0114124	0.00915587	0.0201375	0.000152256	19045502
Ncs1	2.07754e-05	-0.26779	0.26779	0.0986572	0.118779	0.134212	0.168959	0.000155462	1.88437e+07
Idi1	2.08074e-05	-0.353948	0.353948	0.0933207	0.119269	0.112104	0.142927	0.000155633	18865241
Fzd10os	2.11327e-05	-0.244392	0.244392	0.101311	0.120013	0.118356	0.152014	0.000157927	1.88583e+07
Ubxn8	2.1349e-05	-0.205203	0.205203	0.160371	0.184883	0.19741	0.240177	0.0001592	18795856
Klhl11	2.13755e-05	-0.370326	0.370326	0.0668891	0.0864638	0.0931219	0.121807	0.000159249	18885991
Stmn4	2.14171e-05	-1.08714	1.08714	0.0106404	0.0226058	0.0151854	0.0284872	0.000159489	19023928
Gm49359	2.16612e-05	-0.20685	0.20685	0.09464	0.10923	0.115453	0.149067	0.000161054	18861412
Rgp1	2.17457e-05	-0.298669	0.298669	0.0701266	0.0862564	0.0991514	0.128684	0.00016151	1.88794e+07
Cln8	2.19392e-05	-0.223877	0.223877	0.139793	0.163259	0.172398	0.211198	0.000162804	18813918
Zfp235	2.28085e-05	-0.315299	0.315299	0.0516247	0.0642351	0.0676641	0.0933202	0.000168663	18918715
Rfc4	2.32892e-05	-0.301495	0.301495	0.106829	0.131658	0.138231	0.172642	0.000171843	1.88423e+07
Prr14l	2.38412e-05	-0.210785	0.210785	0.148006	0.17129	0.188254	0.229126	0.000175534	1.88042e+07
Dlg3	2.39093e-05	-0.227792	0.227792	0.11277	0.132058	0.144931	0.180747	0.000175958	18836760
D030046N08Rik	2.39921e-05	-0.914169	0.914169	0.00639531	0.0120519	0.0109424	0.0225933	0.000176491	19039472
Moxd1	2.43065e-05	-0.213932	0.213932	0.154766	0.179504	0.145601	0.182466	0.000178649	18836110
Trnp1	2.44751e-05	-0.592952	0.592952	0.0232216	0.0350258	0.0319339	0.0500982	0.000179809	18981250
Col13a1	2.50382e-05	-1.21659	1.21659	0.0132706	0.0308406	0.012059	0.0240668	0.00018331	19035729
Eif2ak1	2.53245e-05	-0.203163	0.203163	0.138606	0.159566	0.176418	0.216601	0.000185007	18813260
Glce	2.53584e-05	-0.20649	0.20649	0.136344	0.157324	0.169272	0.207515	0.000185174	18818816
Caln1	2.54255e-05	-1.28963	1.28963	0.00630347	0.0154098	0.00759268	0.0176817	0.000185584	19053690
Sh3yl1	2.60298e-05	-0.290397	0.290397	0.0937803	0.114691	0.1159	0.147839	0.000189668	18864505
Hist1h1d	2.62025e-05	-0.378776	0.378776	0.07706	0.100196	0.0710138	0.0967583	0.000190844	18916058
Gm45441	2.64713e-05	-0.598658	0.598658	0.0133051	0.0201479	0.0196516	0.0343811	0.000192306	19012018
Nr2c2ap	2.66721e-05	-0.244964	0.244964	0.113916	0.134997	0.157436	0.194008	0.000193681	1.88288e+07
Topbp1	2.69238e-05	-0.228246	0.228246	0.175287	0.205333	0.207235	0.247299	0.000195258	18795058
Col24a1	2.69744e-05	-0.424094	0.424094	0.053088	0.0712297	0.053372	0.0758841	0.000195541	1.89426e+07
Gm13594	2.73298e-05	-0.333517	0.333517	0.0654138	0.0824267	0.0707905	0.0970039	0.000197936	18916579
Insig2	2.73398e-05	-0.206723	0.206723	0.212733	0.245508	0.248995	0.292976	0.000197936	18771981
Trappc10	2.75114e-05	-0.203228	0.203228	0.15123	0.174107	0.192273	0.232564	0.000198986	18804450
Cep72	2.76707e-05	-0.481735	0.481735	0.0325773	0.0454917	0.0482358	0.069499	0.000199904	1.89516e+07
Gfod1	2.78901e-05	-0.758643	0.758643	0.0110331	0.0186669	0.0167485	0.0304519	0.000201232	1.90209e+07
Prss12	2.80197e-05	-0.454533	0.454533	0.0377798	0.0517711	0.0520322	0.074165	0.000201995	18945242
2610027K06Rik	2.81634e-05	-0.353437	0.353437	0.0493045	0.0629915	0.0578383	0.081778	0.000202945	1.89356e+07
Rad9b	2.81817e-05	-0.372808	0.372808	0.0467741	0.0605664	0.0582849	0.081778	0.00020299	1.89353e+07
Pax3	2.84062e-05	-1.1183	1.1183	0.00948752	0.0205965	0.00982582	0.0208743	0.000204259	19044940
Tnfrsf11a	2.92378e-05	-0.869873	0.869873	0.00733821	0.0134106	0.0122823	0.0243124	0.000209882	1.90359e+07
Gmppb	2.9501e-05	-0.288315	0.288315	0.0954202	0.116528	0.132202	0.165275	0.000211682	1.88516e+07
Aqp11	2.97692e-05	-0.409485	0.409485	0.0422201	0.0560773	0.0529254	0.0753929	0.000213245	1.89443e+07
Parvb	2.98482e-05	-0.24035	0.24035	0.189164	0.223456	0.214381	0.254912	0.00021372	1.87928e+07
Utp18	3.02343e-05	-0.20391	0.20391	0.151049	0.173981	0.198303	0.238212	0.000216234	1.88026e+07
Synrg	3.03471e-05	-0.264008	0.264008	0.117409	0.140985	0.155873	0.19057	0.000216835	18832786
Dppa2	3.07857e-05	-0.964434	0.964434	0.00826094	0.0161196	0.00848593	0.0189096	0.00021969	19050902
Hist1h2ag	3.10465e-05	-0.80517	0.80517	0.0187243	0.032718	0.0310406	0.0483792	0.000221272	1.89858e+07
Vps8	3.11528e-05	-0.310993	0.310993	0.0738955	0.0916719	0.099598	0.129175	0.000221749	18884037
Caap1	3.11707e-05	-0.215203	0.215203	0.150454	0.174658	0.19272	0.232564	0.000221783	1.88066e+07
Seh1l	3.12328e-05	-0.20934	0.20934	0.186128	0.215194	0.235373	0.277505	0.000222132	18781932
Col11a2	3.1347e-05	-0.29028	0.29028	0.192974	0.235984	0.139795	0.175098	0.000222757	1.88455e+07
Zfyve1	3.16872e-05	-0.218365	0.218365	0.108056	0.125713	0.136445	0.171415	0.000224985	1.88485e+07
Epn2	3.18643e-05	-0.218827	0.218827	0.13957	0.16243	0.180214	0.21832	0.000226149	1.88155e+07
Slc25a38	3.21231e-05	-0.26021	0.26021	0.0796732	0.0954208	0.107191	0.13777	0.00022789	1.88765e+07
Gcnt1	3.25279e-05	-0.310937	0.310937	0.0795705	0.0987082	0.0933452	0.121807	0.000230568	18891673
2810002D19Rik	3.3002e-05	-0.239501	0.239501	0.0925349	0.109245	0.11255	0.144892	0.00023344	1.8871e+07
Zfp426	3.33152e-05	-0.247413	0.247413	0.107246	0.127309	0.138901	0.173625	0.000235459	18847439
Shc2	3.3354e-05	-0.758905	0.758905	0.0149509	0.0253	0.0236713	0.0392927	0.00023557	19003435
Map3k10	3.44295e-05	-0.223868	0.223868	0.142487	0.166405	0.18669	0.225442	0.000242222	1.88126e+07
Efl1	3.4495e-05	-0.313983	0.313983	0.0884253	0.109925	0.124163	0.155943	0.000242582	1.88615e+07
Ccdc180	3.51592e-05	-0.869911	0.869911	0.0152978	0.0279575	0.0189817	0.0331532	0.000246843	1.90163e+07
Ebag9	3.51977e-05	-0.231029	0.231029	0.1244	0.146005	0.169049	0.206287	0.000247011	18825092
Dnajc21	3.54555e-05	-0.211004	0.211004	0.164855	0.190818	0.207682	0.24779	0.000248615	1.88e+07
Rgcc	3.61695e-05	-0.272716	0.272716	0.130086	0.157155	0.15632	0.191552	0.000253306	1.88353e+07
Hmox1	3.62687e-05	-0.277181	0.277181	0.0729085	0.0883523	0.0942385	0.123035	0.000253896	18892097
Plaur	3.63206e-05	-0.69559	0.69559	0.0242861	0.0393324	0.0439929	0.0638507	0.000254122	1.89622e+07
Egfl7	3.63311e-05	-0.368431	0.368431	0.0768616	0.0992243	0.0987048	0.127456	0.000254122	1.88875e+07
A030001D20Rik	3.82092e-05	-0.476971	0.476971	0.027456	0.0382138	0.0410898	0.0606582	0.000265832	18967724
Gm10638	3.83715e-05	-0.279319	0.279319	0.0938205	0.113863	0.111434	0.142682	0.000266851	1.88748e+07
Cep19	3.89224e-05	-0.281959	0.281959	0.0983043	0.119523	0.129522	0.161591	0.000270349	1.88587e+07
Tgm2	3.9381e-05	-0.579111	0.579111	0.0261403	0.0390517	0.0372934	0.0559921	0.000273189	1.89752e+07
Tcea3	3.96422e-05	-0.276195	0.276195	0.13333	0.161462	0.15163	0.185413	0.000274561	18840844
Capn10	3.97133e-05	-0.318441	0.318441	0.0749038	0.0934037	0.105851	0.135069	0.000274941	1.88816e+07
Adamts14	4.06785e-05	-1.14787	1.14787	0.00701215	0.015538	0.0133988	0.0255403	0.000281163	19034554
Zfp763	4.12971e-05	-0.278224	0.278224	0.0779091	0.0944804	0.0975882	0.126965	0.000284857	1.88902e+07
Enpp5	4.14389e-05	-0.220121	0.220121	0.131992	0.153748	0.15431	0.190324	0.000285719	18838837
Ar	4.16108e-05	-0.201294	0.201294	0.157793	0.18142	0.161456	0.198183	0.000286671	18833522
Dsn1	4.16624e-05	-0.449423	0.449423	0.0286265	0.0390893	0.042653	0.0626228	0.000286909	18965693
Gm40841	4.26184e-05	-0.443281	0.443281	0.0378391	0.0514496	0.0482358	0.0692534	0.000292646	1.89563e+07
Edem2	4.26186e-05	-0.226569	0.226569	0.101316	0.118545	0.136668	0.170187	0.000292646	1.88538e+07
Gm46633	4.27242e-05	-0.660489	0.660489	0.0112596	0.0177971	0.0158553	0.0289784	0.000292912	19026889
Ahsa2	4.27704e-05	-0.20305	0.20305	0.169533	0.195155	0.218848	0.260069	0.00029311	1.87971e+07
Zc3h12b	4.36124e-05	-0.287131	0.287131	0.083046	0.101334	0.106521	0.136542	0.000298397	1.88819e+07
Ephb2	4.49129e-05	-0.459264	0.459264	0.0342782	0.0471271	0.0495757	0.0704813	0.000306777	18954935
Zfp239	4.5203e-05	-0.255879	0.255879	0.0730482	0.0872241	0.0944618	0.123035	0.000308283	1.88951e+07
1810009A15Rik	4.55273e-05	-0.49872	0.49872	0.0232262	0.0328177	0.0388566	0.0577112	0.00031037	18973809
Dubr	4.55547e-05	-0.319188	0.319188	0.0793417	0.0989889	0.104064	0.133104	0.000310432	1.88854e+07
Raver2	4.58926e-05	-0.22206	0.22206	0.103624	0.120867	0.127289	0.160363	0.000312609	18862843
Pycr1	4.63895e-05	-0.218846	0.218846	0.125427	0.145972	0.15766	0.192534	0.000315359	18838768
Sord	4.65885e-05	-0.400129	0.400129	0.0540049	0.0712663	0.0777133	0.102898	0.000316331	1.89156e+07
Gchfr	4.70526e-05	-0.437205	0.437205	0.0660373	0.089413	0.0649844	0.0884086	0.000319226	1.89324e+07
E130311K13Rik	4.71164e-05	-0.244855	0.244855	0.100071	0.118582	0.132202	0.164538	0.000319531	1.88595e+07
Tmeff1	4.75423e-05	-0.243281	0.243281	0.102204	0.120977	0.138008	0.171906	0.000322032	1.88544e+07
Gucy1a2	4.81792e-05	-0.494218	0.494218	0.035728	0.050325	0.0430996	0.0628684	0.000325861	18966609
Ptpn3	4.89947e-05	-0.511113	0.511113	0.0317278	0.0452169	0.0453327	0.0653242	0.000330549	18963058
Taco1os	4.91899e-05	-0.298292	0.298292	0.0682274	0.0838983	0.0830728	0.109774	0.000331733	1.89094e+07
Pld2	4.96996e-05	-0.268579	0.268579	0.0800681	0.0964517	0.105851	0.13556	0.000334904	18884685
Ctsc	4.98538e-05	-0.466595	0.466595	0.0830738	0.114795	0.0859759	0.111739	0.000335676	18906891
Arl5c	5.03993e-05	-0.550064	0.550064	0.0336196	0.0492242	0.050469	0.0712181	0.000338944	18954972
Timmdc1	5.03964e-05	-0.265856	0.265856	0.0975068	0.117237	0.136222	0.168713	0.000338944	18857284
Nqo2	5.0642e-05	-0.211729	0.211729	0.135316	0.156706	0.159	0.195481	0.000340306	18838813
Bmp5	5.07195e-05	-0.312902	0.312902	0.0763235	0.0948093	0.102724	0.131385	0.000340692	18888475
Insl6	5.11039e-05	-0.45914	0.45914	0.0266343	0.0366147	0.0386333	0.0574656	0.00034273	18975343
Zfp982	5.1781e-05	-0.336984	0.336984	0.0467372	0.0590343	0.057615	0.0803045	0.000346408	1.89438e+07
Adamts5	5.19068e-05	-0.306057	0.306057	0.143191	0.17703	0.134882	0.166012	0.000347015	18859370
Fam149b	5.28137e-05	-0.222883	0.222883	0.130959	0.152837	0.170612	0.207269	0.000352522	1.88315e+07
Gak	5.30218e-05	-0.232707	0.232707	0.13536	0.159054	0.181108	0.217338	0.000353632	1.88249e+07
Zfp51	5.31303e-05	-0.433239	0.433239	0.0454345	0.0613485	0.0640911	0.0874263	0.000354216	1.8935e+07
Gm16759	5.31962e-05	-0.453174	0.453174	0.0374239	0.0512351	0.0446628	0.064833	0.000354516	1.89648e+07
Crym	5.35723e-05	-0.388328	0.388328	0.062067	0.081238	0.0602948	0.0832515	0.000356882	18940372
Igkc	5.36638e-05	-1.20693	1.20693	0.0196358	0.0453284	0.0176418	0.030943	0.00035735	19023685
Dynlt1c	5.38654e-05	-0.4713	0.4713	0.0427274	0.0592355	0.0687807	0.0920923	0.000358536	1.89293e+07
4833412C05Rik	5.53606e-05	-0.57765	0.57765	0.0186522	0.0278369	0.0279142	0.0442043	0.000367494	18998018
Ttyh2	5.53562e-05	-0.452084	0.452084	0.0355662	0.048655	0.0480125	0.0685167	0.000367494	1.89599e+07
Usp28	5.54867e-05	-0.331095	0.331095	0.063583	0.0799853	0.0902188	0.117141	0.000368048	1.89032e+07
Adamts17	5.54876e-05	-0.29368	0.29368	0.08935	0.109522	0.11456	0.144401	0.000368048	18878258
Hpgd	5.5646e-05	-0.696054	0.696054	0.0375159	0.0607783	0.0390799	0.0574656	0.000368666	18975787
Fam81a	5.59353e-05	-0.828772	0.828772	0.0162829	0.0289212	0.026351	0.0419941	0.000370292	19001894
Pnkp	5.61429e-05	-0.215204	0.215204	0.126799	0.147197	0.163689	0.199656	0.000371377	1.88376e+07
Fgfbp3	5.65611e-05	-0.242096	0.242096	0.10097	0.119419	0.12059	0.152259	0.000373559	1.88725e+07
Dph6	5.78425e-05	-0.205348	0.205348	0.170426	0.196496	0.215721	0.254666	0.00038113	1.88054e+07
Eef1e1	5.81523e-05	-0.211116	0.211116	0.17496	0.202531	0.22644	0.266945	0.000382725	1.87994e+07
Ccdc43	5.8496e-05	-0.218647	0.218647	0.108489	0.126242	0.148057	0.182711	0.000384837	18849904
Nrk	5.85965e-05	-0.312408	0.312408	0.0512168	0.0635999	0.0560518	0.0785855	0.000385349	18947468
Cep295	5.88746e-05	-0.207409	0.207409	0.190467	0.219916	0.223761	0.262279	0.000387028	1.88016e+07
Fbxo4	6.15501e-05	-0.326545	0.326545	0.0860415	0.107897	0.11992	0.149804	0.000403519	1.88751e+07
Itgb3	6.28978e-05	-0.867967	0.867967	0.0147309	0.0268852	0.0207682	0.0348723	0.00041124	19016501
Apba1	6.33813e-05	-0.437606	0.437606	0.0258884	0.0350621	0.0357302	0.0537819	0.000414081	18983093
Pdzrn4	6.4337e-05	-0.739481	0.739481	0.061443	0.102584	0.0457794	0.0650786	0.000419677	1.89658e+07
Oxld1	6.44662e-05	-0.312009	0.312009	0.0960071	0.119187	0.129522	0.159872	0.000420148	1.88676e+07
Snap29	6.53506e-05	-0.292486	0.292486	0.0933289	0.114304	0.128182	0.15889	0.00042498	1.88688e+07
Strbp	6.54999e-05	-0.253747	0.253747	0.104602	0.124717	0.135105	0.16724	0.000425787	1.88627e+07
Lmf1	6.69806e-05	-0.235968	0.235968	0.124079	0.146127	0.161009	0.196464	0.00043408	18842747
Crls1	6.78648e-05	-0.233863	0.233863	0.147383	0.173319	0.198079	0.235265	0.000439603	1.8819e+07
Gm42937	6.83363e-05	-0.45269	0.45269	0.0464107	0.0635171	0.0549352	0.0763752	0.000442188	1.89515e+07
Eya4	7.11274e-05	-0.503327	0.503327	0.0355055	0.0503283	0.0491291	0.0692534	0.000458148	18961195
Rab37	7.17289e-05	-0.601801	0.601801	0.0181204	0.0274997	0.0203216	0.0343811	0.000461847	1.90186e+07
Tubgcp3	7.35488e-05	-0.204785	0.204785	0.128875	0.14853	0.165029	0.200639	0.000472129	18841652
Mgarp	7.36019e-05	-0.51109	0.51109	0.024618	0.0350838	0.0319339	0.0488703	0.000472291	18992269
Coq4	7.63025e-05	-0.230419	0.230419	0.106867	0.125374	0.141581	0.174607	0.000488324	18859944
Ankrd39	7.70004e-05	-0.216894	0.216894	0.133404	0.155046	0.176865	0.212426	0.000492419	1.88348e+07
Vps25	7.79298e-05	-0.499789	0.499789	0.0413335	0.0584459	0.0623046	0.0842338	0.000496861	18942911
Ctbs	7.85012e-05	-0.277491	0.277491	0.0730066	0.0884902	0.099598	0.127701	0.00049994	18898280
Ganc	7.88355e-05	-0.255375	0.255375	0.101099	0.120676	0.124833	0.155452	0.000501858	1.88747e+07
Cep162	7.89191e-05	-0.228679	0.228679	0.119386	0.139892	0.1523	0.186886	0.000502035	18852099
2510009E07Rik	8.11138e-05	-0.22386	0.22386	0.185127	0.216201	0.227557	0.266208	0.000515029	1.88061e+07
Arfgap1	8.13499e-05	-0.201321	0.201321	0.185274	0.21302	0.22644	0.266699	0.000515947	1.88064e+07
Rec8	8.16779e-05	-0.935559	0.935559	0.0123984	0.0237136	0.0183117	0.0314342	0.000517834	19025288
Uvrag	8.19002e-05	-0.235267	0.235267	0.128416	0.151162	0.168825	0.20334	0.000519006	1.88414e+07
Amdhd2	8.19241e-05	-0.213654	0.213654	0.0979547	0.11359	0.129075	0.161346	0.000519006	18871209
Osbpl2	8.22615e-05	-0.220952	0.220952	0.103189	0.120267	0.138901	0.17166	0.000520948	18863378
Platr25	8.50557e-05	-0.266176	0.266176	0.102236	0.12295	0.128406	0.159381	0.000537237	1.88729e+07
Tex30	8.63166e-05	-0.280828	0.280828	0.0865082	0.105098	0.118133	0.147348	0.000544795	1.88824e+07
Olfml2a	8.64925e-05	-0.420897	0.420897	0.0944479	0.126443	0.096025	0.122544	0.000545702	1.8904e+07
Ing5	8.66526e-05	-0.238538	0.238538	0.130362	0.153801	0.170165	0.205059	0.000546509	1.88415e+07
Arhgef6	8.70326e-05	-0.260031	0.260031	0.112252	0.134422	0.126619	0.157908	0.000548496	1.88746e+07
Eefsec	8.74545e-05	-0.232374	0.232374	0.135164	0.158786	0.173068	0.208251	0.000550336	18839701
Rad54l2	8.81256e-05	-0.200602	0.200602	0.112657	0.129463	0.147164	0.180255	0.000554147	18858282
Rmnd1	8.85443e-05	-0.201476	0.201476	0.1226	0.140975	0.157883	0.192534	0.000556367	1.88502e+07
Htra1	8.88053e-05	-0.31892	0.31892	0.147249	0.183678	0.135552	0.165275	0.000557689	1.88684e+07
Gm14410	9.09682e-05	-0.634909	0.634909	0.0175493	0.0272512	0.0272443	0.0427308	0.000569485	19004405
Kank4	9.13388e-05	-0.484582	0.484582	0.0325442	0.0455353	0.0381867	0.0562377	0.000571593	18982500
Ormdl2	9.185e-05	-0.291046	0.291046	0.0589103	0.0720783	0.0902188	0.116405	0.000573732	18910825
Kcne4	9.22355e-05	-0.679476	0.679476	0.0145948	0.0233744	0.0212148	0.0351179	0.000575928	1.90187e+07
Gm37233	9.42493e-05	-0.655619	0.655619	0.0165779	0.026115	0.0254578	0.0405206	0.000587852	1.90087e+07
Nsg2	9.58021e-05	-0.583217	0.583217	0.0313365	0.0469479	0.0410898	0.0594303	0.000596607	1.8978e+07
Foxred1	9.58292e-05	-0.366885	0.366885	0.062487	0.080581	0.091782	0.117633	0.000596607	1.891e+07
Tada2a	9.65762e-05	-0.232179	0.232179	0.118538	0.139235	0.156543	0.189833	0.000600816	1.88532e+07
Slc26a2	9.6622e-05	-0.243262	0.243262	0.145955	0.172762	0.183341	0.217583	0.00060088	18835434
Trmt5	9.70582e-05	-0.378849	0.378849	0.0453575	0.0589786	0.0631979	0.0857073	0.000603371	1.89441e+07
Hivep1	0.000101379	-0.272564	0.272564	0.0996618	0.120387	0.129969	0.159872	0.000627926	1.8875e+07
Tmem97	0.000101894	-0.240408	0.240408	0.110109	0.130074	0.144484	0.176326	0.000630885	1.88632e+07
Tesk2	0.000103268	-0.367933	0.367933	0.0415572	0.0536297	0.0522555	0.0729371	0.000638311	18960546
Adamts12	0.000103461	-0.286448	0.286448	0.069185	0.0843804	0.084636	0.110511	0.000639183	18918484
Rab3il1	0.000104463	-0.32583	0.32583	0.0660482	0.0827838	0.0844127	0.109774	0.000644906	18919115
Rnd2	0.00010458	-0.255106	0.255106	0.0817559	0.0975694	0.106074	0.134578	0.000645393	1.88964e+07
Dnhd1	0.000105195	-0.595172	0.595172	0.0218598	0.0330226	0.0299241	0.0459234	0.000648245	19000099
Fgd3	0.000105683	-0.652797	0.652797	0.0164145	0.025807	0.0216615	0.035609	0.000651016	1.90187e+07
Pus7l	0.000106693	-0.267049	0.267049	0.04971	0.0598183	0.0649844	0.0879175	0.000656277	18942861
Zfp955a	0.000107387	-0.259989	0.259989	0.0833113	0.0997627	0.111657	0.140717	0.000659831	18891592
D730003I15Rik	0.000107928	-0.263522	0.263522	0.0487751	0.05855	0.0625279	0.0849705	0.000662671	18946357
Gm46218	0.000109124	-0.386424	0.386424	0.0512516	0.0669935	0.0609647	0.0830059	0.000669534	1.89487e+07
Ddah1	0.000109389	-0.345569	0.345569	0.0351817	0.0447037	0.0433229	0.0623772	0.000670914	18975404
1700048O20Rik	0.0001112	-0.309679	0.309679	0.0427494	0.052985	0.0596248	0.0815324	0.000680931	18950755
Eme2	0.00011172	-0.557699	0.557699	0.0181573	0.0267261	0.0261277	0.0412574	0.000683478	19008733
Fan1	0.000113551	-0.354813	0.354813	0.0446999	0.0571631	0.0578383	0.0790766	0.000693926	1.89538e+07
Fez2	0.000114903	-0.214029	0.214029	0.107238	0.124388	0.142921	0.175098	0.000701175	1.88664e+07
Nol9	0.000116269	-0.300998	0.300998	0.0830536	0.102322	0.11322	0.141699	0.000708239	1.88917e+07
Mcur1	0.000116257	-0.216501	0.216501	0.13676	0.158902	0.176641	0.210707	0.000708239	1.88432e+07
Trpc4	0.000116996	-0.544312	0.544312	0.0247902	0.0361522	0.0283609	0.0439587	0.0007119	19004367
Acot9	0.000117809	-0.210861	0.210861	0.1252	0.144903	0.166146	0.200393	0.000716328	18850078
Hist1h4a	0.000118031	-0.764591	0.764591	0.0198095	0.0336541	0.0310406	0.0469057	0.000717424	18999220
2900093K20Rik	0.00011859	-0.262373	0.262373	0.0829594	0.0995057	0.105404	0.133595	0.000720302	18899127
Shf	0.000119068	-0.217495	0.217495	0.0822515	0.0956349	0.110764	0.13998	0.000722947	1.8894e+07
Scn1a	0.000123547	-0.585	0.585	0.0202993	0.0304498	0.0221081	0.0361002	0.000747997	19018968
Znrd1as	0.000124407	-0.372626	0.372626	0.0650058	0.0841634	0.0877624	0.112475	0.000751859	1.89185e+07
Bend5	0.000124782	-0.21334	0.21334	0.137761	0.159716	0.171059	0.205305	0.000753853	18847999
Nog	0.000124857	-0.264858	0.264858	0.130635	0.15696	0.142251	0.174116	0.000754039	1.88685e+07
Mmab	0.000127292	-0.303146	0.303146	0.0737683	0.0910178	0.106967	0.134332	0.000766015	1.88992e+07
Adgrf5	0.000128685	-0.545179	0.545179	0.0388857	0.0567421	0.0453327	0.0640963	0.000773298	18974336
Ypel2	0.000129506	-0.282967	0.282967	0.103556	0.125996	0.135105	0.164784	0.000777401	18875255
Uxt	0.000130131	-0.225118	0.225118	0.124972	0.146076	0.170612	0.204813	0.000780602	1.88491e+07
Hspa2	0.000130626	-0.242016	0.242016	0.0977264	0.115576	0.117686	0.146611	0.000783015	18889643
Dnajc28	0.000133278	-0.646083	0.646083	0.0199911	0.0312844	0.0265744	0.0415029	0.000796373	19009581
Arsi	0.000137776	-0.584557	0.584557	0.0146209	0.0219252	0.0200983	0.0333988	0.000820067	1.90249e+07
Pi15	0.00013832	-0.462306	0.462306	0.0342456	0.0471815	0.0321572	0.0486248	0.00082273	18998197
Mark1	0.000139136	-0.239303	0.239303	0.0961702	0.113521	0.118133	0.147593	0.000827001	1.88901e+07
Ston1	0.000140976	-0.321137	0.321137	0.0586065	0.073218	0.0745869	0.0982318	0.000837055	1.89349e+07
Ildr2	0.000141199	-0.244407	0.244407	0.155949	0.184738	0.141581	0.17387	0.00083809	1.8871e+07
Anpep	0.000141903	-0.301906	0.301906	0.0477522	0.0588676	0.061858	0.0837426	0.000841678	1.8951e+07
Fam107b	0.000144171	-0.231039	0.231039	0.174297	0.204569	0.197186	0.232073	0.000854528	1.88351e+07
Ydjc	0.000144725	-0.501314	0.501314	0.0279683	0.0395891	0.0433229	0.0616405	0.000857215	18978964
Zfp81	0.000146192	-0.207632	0.207632	0.100377	0.115914	0.129299	0.160363	0.000864394	1.88813e+07
Wdr36	0.000146264	-0.203519	0.203519	0.172067	0.198136	0.216838	0.254666	0.000864516	1.88241e+07
Porcn	0.000149811	-0.269897	0.269897	0.0817242	0.0985366	0.108977	0.137033	0.000883631	18899709
Kctd18	0.000152764	-0.267371	0.267371	0.0817917	0.0984455	0.110987	0.138998	0.000898233	1.88983e+07
Fabp5	0.000153057	-0.231135	0.231135	0.317501	0.372669	0.256588	0.295187	0.000899641	1.88062e+07
Prps1l3	0.000153709	-0.270189	0.270189	0.0683297	0.0824033	0.0922287	0.118369	0.000902846	1.89164e+07
Setd4	0.000157119	-0.500876	0.500876	0.033482	0.0473795	0.0471192	0.0658153	0.000920642	18973989
Zfp58	0.000158037	-0.349435	0.349435	0.0475375	0.0605657	0.0634212	0.0852161	0.000925381	18950477
Lrrc32	0.000160262	-0.531536	0.531536	0.0227958	0.0329505	0.0317106	0.0476424	0.000936465	19000847
Pcdhgb6	0.000160699	-0.79368	0.79368	0.00903632	0.0156644	0.0116123	0.0221022	0.000938695	19050461
Zfp54	0.000161123	-0.826961	0.826961	0.0124081	0.0220113	0.0187584	0.0314342	0.000939876	19029832
Nme3	0.000167414	-0.331651	0.331651	0.0461903	0.0581283	0.0629745	0.084725	0.000972448	18951791
Peg12	0.000169852	-0.427167	0.427167	0.0303154	0.0407617	0.0471192	0.0660609	0.000984206	1.89747e+07
Dhcr24	0.00017058	-0.237584	0.237584	0.0740036	0.0872515	0.0904422	0.116159	0.000987893	1.892e+07
B4galt7	0.000177125	-0.225908	0.225908	0.093551	0.109409	0.125949	0.155452	0.00102161	18887840
Tmem126b	0.00018138	-0.231683	0.231683	0.110862	0.130174	0.150067	0.181483	0.00104366	18869833
Gas7	0.000185943	-0.262379	0.262379	0.101273	0.121472	0.107637	0.135806	0.00106774	18904329
Mafb	0.000186541	-0.323972	0.323972	0.134641	0.16854	0.116793	0.14391	0.00107081	18897027
Gm14326	0.000189337	-0.330284	0.330284	0.0516981	0.064998	0.0743636	0.0972495	0.00108551	18939594
Them4	0.000189346	-0.267326	0.267326	0.0906752	0.109134	0.117463	0.145874	0.00108551	1.88962e+07
Gm46430	0.000189557	-0.227481	0.227481	0.0787961	0.0922535	0.0962483	0.12279	0.00108628	18915625
K230015D01Rik	0.000190713	-0.763946	0.763946	0.0143726	0.0244066	0.022778	0.0363458	0.00109217	19021564
Arhgef19	0.00019187	-0.203232	0.203232	0.0882029	0.101546	0.116347	0.144892	0.00109768	1.88973e+07
Vps51	0.000194682	-0.253019	0.253019	0.0756579	0.0901614	0.107414	0.134332	0.00111264	18905789
Antxr2	0.000195023	-0.281066	0.281066	0.0743505	0.0903428	0.0993747	0.125737	0.00111421	18913249
Wrb	0.000195404	-0.214068	0.214068	0.137064	0.158988	0.173738	0.208006	0.00111601	1.8855e+07
Adssl1	0.000196443	-0.328691	0.328691	0.0550267	0.0691066	0.0636445	0.0854617	0.00112119	1.8953e+07
Gm16070	0.00020094	-0.269413	0.269413	0.0730236	0.0880167	0.07682	0.100933	0.00114454	1.89371e+07
Gpat3	0.00020315	-0.486229	0.486229	0.0332339	0.0465534	0.0455561	0.0638507	0.00115596	18979433
Cdc14b	0.000207139	-0.208308	0.208308	0.102748	0.118709	0.129299	0.158644	0.00117589	1.8888e+07
Rcc1	0.000209889	-0.284527	0.284527	0.0630078	0.0767442	0.0908888	0.116159	0.00118957	1.89229e+07
Clcn5	0.000211301	-0.424294	0.424294	0.0513829	0.0689515	0.0797231	0.102161	0.00119591	18935599
Mospd2	0.000218232	-0.269162	0.269162	0.0907367	0.109347	0.124163	0.152259	0.00123062	18893378
Gm21887	0.000218543	-0.787391	0.787391	0.0134968	0.0232948	0.0241179	0.0378193	0.00123161	1.90199e+07
Eno3	0.000222038	-0.325964	0.325964	0.053879	0.0675374	0.0783832	0.101424	0.00124875	18937422
Jpx	0.000223457	-0.216264	0.216264	0.0825472	0.0958968	0.107191	0.134578	0.00125632	18908037
Mdn1	0.000227001	-0.200982	0.200982	0.139174	0.159978	0.177088	0.211444	0.00127328	1.88559e+07
Idua	0.000228227	-0.333204	0.333204	0.0369194	0.0465113	0.0473426	0.0660609	0.00127804	1.89779e+07
Lsm14b	0.000229477	-0.233957	0.233957	0.102269	0.120274	0.139125	0.168713	0.00128419	18882482
Gm17501	0.000230587	-0.611308	0.611308	0.01994	0.0304613	0.0326038	0.0481336	0.00128955	19003160
Zfp385b	0.000231676	-0.31074	0.31074	0.104437	0.129538	0.11657	0.14391	0.00129436	18900774
Klhl33	0.000231551	-0.279215	0.279215	0.111686	0.135535	0.109201	0.136788	0.00129436	1.89068e+07
Gphn	0.000232477	-0.240467	0.240467	0.108322	0.127968	0.143144	0.173379	0.00129798	1.88796e+07
Edrf1	0.000241162	-0.213214	0.213214	0.115814	0.13426	0.148727	0.179519	0.00134292	1.88763e+07
Hist1h3i	0.000242319	-0.641002	0.641002	0.0160467	0.0250234	0.0243412	0.0380648	0.00134848	19020317
B3galt1	0.000243638	-0.218931	0.218931	0.111811	0.130134	0.126396	0.156434	0.00135502	18892853
Gan	0.000247775	-0.249395	0.249395	0.0722476	0.0858814	0.0982582	0.123772	0.00137509	1.89184e+07
Ltbp4	0.000257556	-0.486993	0.486993	0.109595	0.1536	0.11858	0.142682	0.00142345	1.89022e+07
Plekhf1	0.000260496	-0.262891	0.262891	0.0711597	0.0853832	0.0958017	0.121316	0.00143548	1.89215e+07
Adamts2	0.00026499	-0.206988	0.206988	0.265383	0.306325	0.239616	0.274558	0.00145835	18826721
D830050J10Rik	0.000266523	-0.293134	0.293134	0.0923129	0.113111	0.117463	0.144401	0.00146631	1.89026e+07
Haus3	0.000267254	-0.204201	0.204201	0.121334	0.139782	0.15364	0.184921	0.00146937	1.88748e+07
Homer1	0.000271049	-0.351617	0.351617	0.0504107	0.0643235	0.0750335	0.0972495	0.00148638	1.89443e+07
Six1	0.00027609	-0.21375	0.21375	0.127087	0.147383	0.15297	0.18443	0.0015128	18875761
Adam9	0.000276848	-0.287992	0.287992	0.070131	0.0856257	0.0998213	0.124754	0.00151622	18919032
Hist1h2bb	0.000278685	-0.667944	0.667944	0.0233938	0.0371683	0.0299241	0.0446955	0.0015248	19010283
Zfp870	0.000292901	-0.292977	0.292977	0.0462969	0.0567214	0.0600715	0.0805501	0.00159325	18963308
Trmt12	0.000294002	-0.290877	0.290877	0.0536267	0.065606	0.0723537	0.0945481	0.00159725	1.89483e+07
Pelo	0.000294414	-0.21181	0.21181	0.111665	0.129324	0.153863	0.184921	0.00159897	1.88765e+07
Gm10115	0.000298275	-0.721907	0.721907	0.0110521	0.0182289	0.0127289	0.0230845	0.00161683	19051628
Zfp407	0.000302383	-0.213676	0.213676	0.111938	0.129808	0.147387	0.177554	0.00163439	18881640
Nphp3	0.00030392	-0.207525	0.207525	0.0887664	0.102499	0.11657	0.144401	0.00164081	18905228
Dzip1l	0.000304301	-0.208924	0.208924	0.114047	0.131818	0.147834	0.178045	0.00164162	1.88814e+07
Rhou	0.000305489	-0.243313	0.243313	0.101349	0.119968	0.129299	0.157908	0.00164698	18895202
Rab27b	0.000306263	-0.435614	0.435614	0.04964	0.0671375	0.0728004	0.0938114	0.00165062	1.8949e+07
Car5b	0.000308129	-0.432415	0.432415	0.0317439	0.042838	0.0397499	0.0567289	0.0016591	1.89936e+07
Gm26916	0.000308105	-0.423106	0.423106	0.0518697	0.0695475	0.0580616	0.0780943	0.0016591	18966680
3110009F21Rik	0.000308641	-0.478522	0.478522	0.0221105	0.030807	0.0245645	0.0383104	0.00166133	19021994
Fcor	0.000310819	-0.275312	0.275312	0.0506854	0.0613423	0.0676641	0.089391	0.00167047	1.89545e+07
Tanc2	0.000310932	-0.222098	0.222098	0.0998693	0.11649	0.128182	0.15668	0.00167047	18896393
Inpp4b	0.000312217	-0.221976	0.221976	0.121864	0.142133	0.144038	0.17387	0.00167631	18884638
Rwdd3	0.000313609	-0.2719	0.2719	0.0705051	0.0851276	0.0886556	0.112721	0.00168218	18931727
Mxd1	0.000315059	-0.277753	0.277753	0.0815079	0.0988125	0.110764	0.136788	0.00168943	1.89113e+07
Map7d3	0.000315247	-0.327932	0.327932	0.0571583	0.0717458	0.0741402	0.0962672	0.0016899	18947417
Spon2	0.000320121	-0.667182	0.667182	0.0165251	0.0262414	0.0212148	0.03389	0.00171223	19030000
Hist1h2ac	0.000326153	-0.457507	0.457507	0.0252559	0.0346806	0.0346137	0.0503438	0.0017423	19003156
Trappc11	0.000326437	-0.21606	0.21606	0.116979	0.135878	0.15699	0.187868	0.00174326	18876559
Ighm	0.000331236	-0.529339	0.529339	0.0200411	0.0289246	0.0178651	0.0297151	0.00176499	1.90383e+07
Hsd17b7	0.000333447	-0.285147	0.285147	0.0502317	0.0612091	0.0714605	0.0933202	0.00177622	1.89512e+07
Zdhhc12	0.000335444	-0.259262	0.259262	0.0731602	0.087563	0.107191	0.132859	0.00178461	18915464
Adck1	0.000336451	-0.288368	0.288368	0.0693971	0.0847518	0.0982582	0.123035	0.00178884	18923640
Tmem14a	0.000337238	-0.303896	0.303896	0.0690808	0.0852785	0.0922287	0.116405	0.00179246	18929436
Plekhf2	0.000338677	-0.24442	0.24442	0.0998659	0.118303	0.132649	0.161346	0.00179786	1.88946e+07
Tmem53	0.000338413	-0.238909	0.238909	0.113366	0.133783	0.139571	0.168222	0.00179786	1.88896e+07
Cap2	0.000344536	-0.364231	0.364231	0.0138633	0.0178448	0.019205	0.0314342	0.00182495	19035284
Sema3d	0.000346674	-0.343854	0.343854	0.0653674	0.0829606	0.0665476	0.0874263	0.00183439	18957753
Cnih2	0.000346831	-0.29633	0.29633	0.0535264	0.0657313	0.0752568	0.0972495	0.00183439	18947674
Sort1	0.000347494	-0.23866	0.23866	0.12007	0.141671	0.152077	0.181729	0.00183675	1.88813e+07
Gm5577	0.0003538	-0.323259	0.323259	0.0567053	0.070947	0.0665476	0.0876719	0.00186585	1.89579e+07
Spryd7	0.000358627	-0.216617	0.216617	0.105619	0.12273	0.135328	0.164293	0.00188837	1.88936e+07
Ano8	0.000359975	-0.250446	0.250446	0.0631168	0.0750822	0.0853059	0.108792	0.00189429	1.89373e+07
Fads3	0.000366002	-0.377789	0.377789	0.0457836	0.0594888	0.0609647	0.0807957	0.00192182	18965535
Mipol1	0.000368926	-0.25976	0.25976	0.0991766	0.118742	0.126619	0.153733	0.00193478	18901133
Zfp882	0.000370749	-0.235817	0.235817	0.0587321	0.0691614	0.0748102	0.0972495	0.00194193	1.89489e+07
Epb41l5	0.000390627	-0.363459	0.363459	0.0436147	0.0561106	0.0616347	0.0815324	0.0020366	18965574
Fam129a	0.000397392	-0.276604	0.276604	0.129032	0.156301	0.136222	0.164047	0.00206868	1.88953e+07
Cgnl1	0.000415325	-0.303148	0.303148	0.0846502	0.104444	0.113667	0.138752	0.00215409	1.8914e+07
Sacs	0.000423663	-0.273765	0.273765	0.0923038	0.111592	0.120366	0.147102	0.00219264	1.89085e+07
Tmem220	0.000434779	-0.37274	0.37274	0.0443624	0.0574409	0.0598481	0.0793222	0.00224126	1.89693e+07
Mettl21a	0.000442093	-0.22336	0.22336	0.101573	0.118582	0.140464	0.168713	0.00227481	18894185
Cdkn2d	0.000442396	-0.202354	0.202354	0.14998	0.172563	0.183341	0.217092	0.00227568	18866240
D630003M21Rik	0.000447451	-0.329875	0.329875	0.0248717	0.0312614	0.034837	0.0503438	0.00229749	19006271
Gpcpd1	0.000447648	-0.233412	0.233412	0.108033	0.127005	0.143591	0.172642	0.00229762	18892043
Zfp932	0.000452366	-0.241981	0.241981	0.0864866	0.10228	0.119473	0.145629	0.00232062	1.89106e+07
Osbpl11	0.000455282	-0.235705	0.235705	0.0974148	0.114704	0.131979	0.159627	0.00233346	18900876
Itga2b	0.000459151	-0.239639	0.239639	0.0553588	0.0653619	0.0616347	0.0820236	0.00235186	1.89675e+07
Rnf219	0.000473095	-0.21555	0.21555	0.118669	0.137792	0.156543	0.186395	0.00241598	1.88845e+07
Gm266	0.000473995	-0.424642	0.424642	0.0275301	0.036952	0.0451094	0.0621316	0.00241985	18990721
Ccdc40	0.000476336	-0.561223	0.561223	0.0110446	0.0162965	0.0145154	0.0250491	0.00243106	19050226
1700019D03Rik	0.000488407	-0.329671	0.329671	0.0593835	0.0746288	0.0647611	0.0852161	0.00248742	18964726
Trak2	0.000492706	-0.223366	0.223366	0.0814246	0.0950595	0.113667	0.13998	0.0025063	18916529
Fancc	0.000494151	-0.252144	0.252144	0.069467	0.0827334	0.0897722	0.113212	0.0025129	1.89381e+07
Adgrg6	0.000497888	-0.515941	0.515941	0.101889	0.145694	0.100715	0.122299	0.00253038	18929246
Ero1lb	0.000498607	-0.425779	0.425779	0.0368341	0.0494792	0.0486824	0.0663065	0.00253328	18986135
Hist1h2bj	0.000508656	-0.864882	0.864882	0.017324	0.0315503	0.0292541	0.0429764	0.00257621	19018167
Gm20707	0.000518354	-0.468004	0.468004	0.028265	0.039096	0.0393033	0.0552554	0.00262181	1.90007e+07
Pick1	0.000518726	-0.268761	0.268761	0.0713182	0.0859222	0.0998213	0.124018	0.00262245	18929628
Vcam1	0.000525468	-0.468554	0.468554	0.0472184	0.0653372	0.0587316	0.0773576	0.00265066	18973673
Phf7	0.000532929	-0.297128	0.297128	0.0456304	0.0560659	0.0640911	0.0839882	0.0026835	18966987
Cntrob	0.000538236	-0.350649	0.350649	0.0593141	0.0756335	0.0853059	0.107318	0.0027054	18944247
Dyrk1b	0.000541351	-0.287812	0.287812	0.0690706	0.0843205	0.092452	0.115668	0.00271864	1.89372e+07
Fam162b	0.000548402	-0.532823	0.532823	0.0318677	0.0461049	0.0408665	0.0569745	0.0027516	18998997
Calcrl	0.000553013	-0.248683	0.248683	0.0618522	0.073488	0.0623046	0.0825147	0.00277145	1.89693e+07
Crnde	0.00056908	-0.336727	0.336727	0.0586768	0.0741023	0.0748102	0.0960216	0.00284355	1.89558e+07
Dcbld2	0.000570592	-0.220902	0.220902	0.0946789	0.110345	0.127512	0.153978	0.00284859	18908686
Wasf1	0.000575014	-0.301051	0.301051	0.0415413	0.0511806	0.0582849	0.0773576	0.00286813	1.89752e+07
Atg4c	0.000576938	-0.321867	0.321867	0.0631748	0.0789651	0.0891023	0.111493	0.00287687	1.89416e+07
Rab33b	0.000596335	-0.223479	0.223479	0.123998	0.144773	0.162573	0.191552	0.00296313	18885713
Zfp449	0.000598171	-0.233467	0.233467	0.0798481	0.0938739	0.105181	0.130157	0.00297138	1.89272e+07
Akt3	0.000602895	-0.233683	0.233683	0.0922623	0.108485	0.12059	0.146857	0.00299133	18914852
Pcsk7	0.000611493	-0.213934	0.213934	0.0904696	0.104931	0.125056	0.151768	0.00302867	18911666
Wfdc6a	0.000611997	-0.75683	0.75683	0.0115173	0.0194616	0.0160786	0.0267682	0.00302996	19048305
Naaa	0.000616828	-0.240795	0.240795	0.0606136	0.0716237	0.0839661	0.106336	0.00305153	1.89475e+07
Mettl8	0.000624168	-0.314824	0.314824	0.0869888	0.108202	0.111657	0.135806	0.00308423	1.89231e+07
Glb1l	0.00062989	-0.225134	0.225134	0.0684499	0.08001	0.088209	0.111248	0.00310978	1.89436e+07
Uprt	0.000636278	-0.54959	0.54959	0.0210536	0.0308156	0.0288075	0.0424853	0.00313766	1.90212e+07
Fndc5	0.000637463	-0.279977	0.279977	0.0634147	0.0769966	0.0794998	0.100933	0.00314208	1.89527e+07
Rad51c	0.000652406	-0.400751	0.400751	0.0349972	0.0462032	0.0468959	0.0638507	0.00320878	18992209
Ddn	0.000652653	-0.260869	0.260869	0.0774828	0.0928399	0.0801697	0.102407	0.00320907	1.89521e+07
Ddc	0.000653699	-0.562248	0.562248	0.0174308	0.0257377	0.027021	0.040275	0.00321234	19024873
A430033K04Rik	0.000657589	-0.34119	0.34119	0.0435046	0.0551116	0.0609647	0.0800589	0.00322959	18973860
9930104L06Rik	0.000686777	-0.233683	0.233683	0.0662484	0.077897	0.0897722	0.112967	0.00335639	18943503
Ppp1r3b	0.000691197	-0.428144	0.428144	0.0278467	0.0374678	0.0379634	0.0532908	0.00337701	19006378
Nptxr	0.000702334	-0.353359	0.353359	0.0449012	0.0573627	0.0656543	0.0849705	0.00342451	18969449
Thoc6	0.000710296	-0.235035	0.235035	0.0924351	0.10879	0.129522	0.156189	0.00346134	1.89113e+07
Gm5165	0.00071188	-0.407267	0.407267	0.0444913	0.0590031	0.0602948	0.078831	0.00346806	18976018
Tyw5	0.000716129	-0.222519	0.222519	0.114807	0.133954	0.153863	0.181974	0.00348475	1.8895e+07
Ccpg1os	0.000726609	-0.287144	0.287144	0.0562475	0.0686345	0.0801697	0.101424	0.00352561	1.89542e+07
Zfp597	0.000751386	-0.237765	0.237765	0.0696208	0.0820944	0.0931219	0.116405	0.00363096	18941983
Lrrk2	0.000754324	-0.235007	0.235007	0.0694482	0.0817345	0.0933452	0.116159	0.00364235	18942048
Cep126	0.000758562	-0.272981	0.272981	0.0630155	0.0761418	0.0815096	0.102898	0.0036576	1.89535e+07
Usp53	0.000758876	-0.425145	0.425145	0.0457466	0.0614243	0.0707905	0.0901277	0.00365807	1.89651e+07
A330035P11Rik	0.000763454	-0.510678	0.510678	0.0144669	0.0206113	0.0183117	0.0294695	0.00367805	19044753
Tmem40	0.000765044	-0.356242	0.356242	0.0426169	0.0545533	0.0453327	0.0621316	0.00368256	1.89963e+07
Adcy7	0.000769336	-0.653385	0.653385	0.0191535	0.0301257	0.0350603	0.0493615	0.00369797	1.90126e+07
Baz1a	0.000775495	-0.250122	0.250122	0.0806482	0.0959155	0.108754	0.133104	0.00372651	1.89292e+07
Entpd7	0.000777357	-0.226872	0.226872	0.0865631	0.101304	0.119026	0.144155	0.00373334	18921083
Fam161a	0.000783342	-0.249069	0.249069	0.0675941	0.0803316	0.0873158	0.109774	0.00375782	1.89482e+07
D330050I16Rik	0.00079757	-0.563085	0.563085	0.0246839	0.0364686	0.0375167	0.0523084	0.0038185	19009019
1700105P06Rik	0.000803989	-0.382051	0.382051	0.0410005	0.0534316	0.0529254	0.0704813	0.0038438	1.89869e+07
Ubxn2b	0.000804699	-0.214202	0.214202	0.0733639	0.0851067	0.100491	0.124263	0.00384611	1.89367e+07
Siah2	0.000805517	-0.26668	0.26668	0.0750311	0.0902652	0.106297	0.130157	0.00384894	1.8932e+07
Top1mt	0.0008095	-0.375296	0.375296	0.0366747	0.0475709	0.0522555	0.0697446	0.0038642	18987818
Mgll	0.000813222	-0.386298	0.386298	0.061296	0.080116	0.0839661	0.104862	0.00387809	18952534
Efna5	0.000834141	-0.226655	0.226655	0.18771	0.219644	0.216615	0.246562	0.00396557	18864514
Col6a5	0.000834735	-0.941547	0.941547	0.0157685	0.0302848	0.0154087	0.0255403	0.00396616	19052806
Hist1h2ab	0.000838953	-0.908399	0.908399	0.016995	0.0318989	0.0250112	0.0373281	0.00398285	19031611
Armc6	0.00085045	-0.279365	0.279365	0.0440727	0.0534893	0.0634212	0.0825147	0.00403404	1.89747e+07
Zfp943	0.000903064	-0.243474	0.243474	0.0625062	0.0739973	0.0857526	0.107564	0.00425382	1.89522e+07
Poc1b	0.000904402	-0.264072	0.264072	0.0677625	0.0813735	0.0911121	0.113458	0.00425776	18947217
Gm49970	0.000917645	-0.346214	0.346214	0.024838	0.0315746	0.0276909	0.0410118	0.00431291	19027005
Map11	0.00092058	-0.258531	0.258531	0.0791772	0.0947165	0.104734	0.128438	0.0043231	1.89356e+07
Ccdc134	0.000921108	-0.352813	0.352813	0.0440195	0.056215	0.065431	0.0842338	0.00432438	1.89739e+07
Usp54	0.000925617	-0.270255	0.270255	0.0596214	0.0719047	0.0786065	0.0994597	0.00434314	18959652
B3gnt2	0.000932742	-0.21019	0.21019	0.108542	0.125566	0.132202	0.158153	0.00437294	18914938
Tnnt1	0.000939278	-0.514955	0.514955	0.0240666	0.0343899	0.034837	0.0491159	0.00440115	19015179
Eif3j2	0.000942292	-0.362794	0.362794	0.0443432	0.0570215	0.0743636	0.094057	0.00441404	18964587
Dgat2	0.00095105	-0.471039	0.471039	0.01922	0.026641	0.0254578	0.0380648	0.00445138	19031776
Zfp583	0.00095339	-0.223494	0.223494	0.0370045	0.0432049	0.0486824	0.0658153	0.00445986	1.89946e+07
Gm42941	0.000969133	-0.334689	0.334689	0.0479682	0.0604929	0.0556052	0.0734283	0.00452601	18986030
Ppm1h	0.000984498	-0.400518	0.400518	0.0349401	0.0461203	0.0442162	0.060167	0.00459253	1.90014e+07
Cdc42ep2	0.000984733	-0.276455	0.276455	0.0666279	0.0807007	0.080393	0.10167	0.00459253	18958752
Ikbke	0.000990025	-0.300432	0.300432	0.0516257	0.0635777	0.0647611	0.0834971	0.00461339	18975648
Rundc1	0.000992829	-0.223648	0.223648	0.0465634	0.0543712	0.0665476	0.0859528	0.00462519	1.89735e+07
Smad3	0.000999903	-0.223015	0.223015	0.115892	0.135266	0.153417	0.180255	0.00465175	18902511
Gm20186	0.00100425	-0.433133	0.433133	0.0332917	0.0449492	0.0466726	0.0628684	0.0046694	1.89983e+07
Ankrd37	0.00101403	-0.437548	0.437548	0.0473572	0.0641359	0.061858	0.0798134	0.0047097	1.89795e+07
Psd	0.00102248	-0.241262	0.241262	0.0368228	0.0435255	0.0489058	0.0658153	0.00473727	1.89953e+07
Usp35	0.00104087	-0.578633	0.578633	0.021669	0.0323612	0.0314873	0.0449411	0.00481192	19022035
Mmp16	0.00106486	-0.205288	0.205288	0.113589	0.130958	0.135552	0.161837	0.00490541	1.89152e+07
Tmem123	0.00106542	-0.269229	0.269229	0.134781	0.162434	0.173068	0.199656	0.00490665	1.88926e+07
Gm19705	0.00106682	-0.643491	0.643491	0.0168772	0.026364	0.0214381	0.0329077	0.00491179	19041147
Ppat	0.00107641	-0.240773	0.240773	0.0895726	0.105841	0.119696	0.14391	0.00494651	18926995
Pcyt1b	0.00109796	-0.481753	0.481753	0.0311814	0.0435429	0.0395266	0.0545187	0.00502916	1.90097e+07
Paqr3	0.00110196	-0.442321	0.442321	0.0262181	0.0356249	0.0366235	0.0510806	0.00504342	19014218
Tfr2	0.00110304	-0.368784	0.368784	0.0335005	0.043258	0.0468959	0.0631139	0.00504696	18999226
Slc36a2	0.00111835	-0.287039	0.287039	0.0821147	0.100191	0.0819562	0.102652	0.00510463	1.89596e+07
A330041J22Rik	0.00113846	-0.560489	0.560489	0.0177551	0.0261846	0.0209915	0.0324165	0.00518662	19042619
Enpep	0.00113924	-0.582916	0.582916	0.020008	0.0299694	0.0238946	0.0358546	0.00518876	19036816
Rngtt	0.00114012	-0.210523	0.210523	0.0901102	0.104267	0.126396	0.151523	0.00519139	1.89231e+07
Mamld1	0.00115154	-0.491569	0.491569	0.0206344	0.0290113	0.0256811	0.0380648	0.00523775	19033436
Gm20621	0.00116329	-0.60145	0.60145	0.0142513	0.0216226	0.0200983	0.0311886	0.00528269	19044829
Pacc1	0.00117127	-0.469431	0.469431	0.0208598	0.0288818	0.0314873	0.0449411	0.00531465	1.90233e+07
Gm47204	0.00118394	-0.527218	0.527218	0.0126552	0.0182381	0.0185351	0.029224	0.00536495	1.90484e+07
Polr3g	0.0011991	-0.313405	0.313405	0.0823752	0.102363	0.11188	0.134578	0.00542207	18935278
Rp2	0.00121448	-0.201483	0.201483	0.0993027	0.114186	0.127959	0.153487	0.00548719	18923116
Ddx59	0.00123136	-0.324452	0.324452	0.0481745	0.0603236	0.0714605	0.0906189	0.00555903	18971819
Cep78	0.00126198	-0.297721	0.297721	0.0541333	0.0665407	0.080393	0.100688	0.00568359	1.89632e+07
Ripor3	0.00127642	-0.763846	0.763846	0.019059	0.0323625	0.0238946	0.035609	0.00574491	1.90381e+07
Cideb	0.00128672	-0.383668	0.383668	0.0205212	0.0267731	0.026351	0.0388016	0.00578271	19033342
Wdr5b	0.00131201	-0.357765	0.357765	0.0297558	0.0381303	0.0424297	0.0577112	0.00587923	1.90077e+07
Tmem108	0.00131985	-0.346947	0.346947	0.0455604	0.0579467	0.0511389	0.06778	0.00590654	18996113
Zfp189	0.00133938	-0.304079	0.304079	0.0417151	0.0515028	0.0569451	0.0744106	0.00598253	1.89892e+07
Clec16a	0.0013587	-0.227053	0.227053	0.0480966	0.0562943	0.0683341	0.0876719	0.00606117	18976357
Cend1	0.00137468	-0.345252	0.345252	0.0386977	0.0491605	0.046226	0.0621316	0.00612278	1.90031e+07
4933431E20Rik	0.00138396	-0.348779	0.348779	0.0433321	0.0551827	0.0591782	0.0766208	0.00615602	18987168
Tspan12	0.00143471	-0.391406	0.391406	0.0235384	0.0308746	0.031264	0.0444499	0.00634013	19026028
Cgref1	0.00143639	-0.272752	0.272752	0.0639112	0.0772117	0.0681108	0.0869352	0.00634425	18977674
Adamtsl3	0.00143934	-0.439791	0.439791	0.0324561	0.0440237	0.0428763	0.0579568	0.0063556	19008431
Foxn2	0.00144824	-0.218639	0.218639	0.070251	0.0817465	0.104288	0.126965	0.00638827	18944520
Zfp607b	0.00147444	-0.250414	0.250414	0.0413464	0.0491835	0.0585083	0.0761297	0.00648525	18988713
Dhdh	0.00149117	-0.256386	0.256386	0.0351016	0.0419282	0.0446628	0.0604126	0.00654693	1.90062e+07
Hist4h4	0.0015054	-0.25389	0.25389	0.0520688	0.0620878	0.0663243	0.0849705	0.00659741	1.89803e+07
Zfp975	0.00150683	-0.211438	0.211438	0.0636603	0.0737086	0.0819562	0.102898	0.00660197	1.89644e+07
Ddx51	0.00150866	-0.312405	0.312405	0.03559	0.0441948	0.0535954	0.0702358	0.0066083	18995059
Pomk	0.0015138	-0.21505	0.21505	0.0714466	0.0829312	0.0946851	0.11665	0.00662909	1.89532e+07
Arhgef26	0.00151822	-0.208526	0.208526	0.0506001	0.0584687	0.0636445	0.0820236	0.00664331	1.89833e+07
9330104G04Rik	0.00151947	-0.375745	0.375745	0.0213525	0.027705	0.0283609	0.0410118	0.00664705	1.90316e+07
Gm15446	0.00152742	-0.236343	0.236343	0.0449036	0.0528965	0.0620813	0.0800589	0.00667664	18985209
9430060I03Rik	0.00157109	-0.477685	0.477685	0.0182191	0.0253702	0.0247879	0.0365914	0.00684809	1.90385e+07
Tfpi	0.00158096	-0.232104	0.232104	0.0871494	0.102361	0.0989281	0.12058	0.0068858	18950674
Gm49980	0.00158552	-0.209218	0.209218	0.0607081	0.0701823	0.0770433	0.0972495	0.00690389	18969998
Wdpcp	0.00159641	-0.265951	0.265951	0.0603325	0.0725455	0.0832961	0.103389	0.00694239	1.89645e+07
Gadd45a	0.00159688	-0.326465	0.326465	0.0810275	0.101603	0.102948	0.124263	0.00694262	1.89478e+07
Tnip2	0.00162401	-0.385058	0.385058	0.0411694	0.0537636	0.0600715	0.077112	0.0070371	18988715
Ldlr	0.00164406	-0.385667	0.385667	0.0397996	0.0519968	0.057615	0.0744106	0.00711488	18991678
9530018F02Rik	0.0016939	-0.285391	0.285391	0.030704	0.0374202	0.041983	0.0569745	0.00728587	19011679
Zfp791	0.00169605	-0.600425	0.600425	0.0135962	0.0206141	0.0178651	0.0279961	0.00729328	1.90534e+07
Gm26759	0.00169932	-0.526432	0.526432	0.0188674	0.0271758	0.023448	0.0348723	0.00730178	1.90419e+07
Mus81	0.00170353	-0.228457	0.228457	0.0846105	0.0991281	0.118356	0.141454	0.00731614	18937134
Npr1	0.00171415	-0.597748	0.597748	0.0120744	0.0182728	0.0178651	0.0279961	0.00735616	19053487
Trim46	0.00174038	-0.270801	0.270801	0.0272384	0.0328625	0.03841	0.0527996	0.00745362	19017125
Rgs5	0.00174179	-0.440811	0.440811	0.0883619	0.11994	0.0464493	0.0618861	0.00745588	1.90061e+07
Zfp120	0.00176412	-0.280752	0.280752	0.0616911	0.0749441	0.0870925	0.107318	0.00754386	1.89629e+07
B3gntl1	0.00176697	-0.399563	0.399563	0.031187	0.041139	0.0464493	0.0618861	0.00755223	1.90063e+07
Srf	0.00177413	-0.321192	0.321192	0.0410099	0.0512362	0.0649844	0.0827603	0.00757325	1.89845e+07
Tspan2	0.00178525	-0.318849	0.318849	0.0381937	0.0476403	0.0558285	0.0726916	0.00761498	18994782
Zscan2	0.00179174	-0.291224	0.291224	0.0319915	0.0391473	0.0439929	0.0591847	0.00763686	19009702
Parpbp	0.0017931	-0.548333	0.548333	0.0192033	0.0280829	0.0343904	0.0476424	0.00764074	19023835
Synpr	0.0018028	-0.386202	0.386202	0.0395577	0.0516999	0.0518088	0.06778	0.00767243	18999932
4930452B06Rik	0.00184451	-0.450303	0.450303	0.0178032	0.024325	0.0265744	0.038556	0.00783615	1.9037e+07
Kitl	0.00185796	-0.485106	0.485106	0.0689494	0.0965077	0.0837427	0.102161	0.00788341	18967378
Zfp758	0.00185895	-0.243684	0.243684	0.0421109	0.0498598	0.0547119	0.0714637	0.00788562	18996652
Prkdc	0.00193224	-0.213491	0.213491	0.0955863	0.110831	0.126172	0.149804	0.0081455	18934163
Nupr1	0.00193967	-0.256708	0.256708	0.121774	0.145489	0.0953551	0.116405	0.00817277	1.89574e+07
Otud3	0.00195148	-0.449402	0.449402	0.0244037	0.0333226	0.0370701	0.050835	0.0082103	1.90207e+07
Zfp438	0.00195244	-0.261989	0.261989	0.0389397	0.0466938	0.0511389	0.0672888	0.00821228	19001703
Nhsl1	0.00195543	-0.23209	0.23209	0.086567	0.101676	0.11523	0.138261	0.00821945	1.8942e+07
Fadd	0.00196642	-0.337899	0.337899	0.0576693	0.0728891	0.0835194	0.102652	0.00826081	1.89682e+07
Lmtk2	0.00205398	-0.260299	0.260299	0.0477103	0.0571439	0.0701206	0.0884086	0.0085797	18981514
Bicdl1	0.00206354	-0.243306	0.243306	0.0284525	0.0336793	0.0370701	0.0510806	0.00861113	1.90212e+07
Lyrm4	0.00206534	-0.2662	0.2662	0.0599184	0.07206	0.0835194	0.103389	0.00861651	1.89688e+07
Dapk2	0.00212397	-0.250025	0.250025	0.084075	0.0999843	0.0922287	0.112967	0.00883284	1.89617e+07
Fam221b	0.00213848	-0.278096	0.278096	0.0199436	0.0241834	0.0243412	0.0358546	0.00888663	19042559
Mtg1	0.00218819	-0.215147	0.215147	0.0632565	0.0734296	0.0855293	0.105599	0.00907315	1.8968e+07
Slx4	0.00221558	-0.218448	0.218448	0.0568876	0.0661877	0.0806163	0.100196	0.00917549	18972603
[truncated: 4 more rows]

## Sheet: Enrichr_Result (P<0.05)
Rank	Term	Overlap	P-value	Adjusted P-value	Odds Ratio	Combined Score	Genes
[truncated: 17 more rows]
